# Supplementary material for: A chromosome-scale epigenetic map of the Hydra genome reveals conserved regulators of cell state
Source: HighWire-hosted journal article supplement (doi:10.1101/gr.277040.122), 2023-01-13
Supplement: Supplemental_Data_S1.xlsx [file Supplemental_Data_S1.xlsx]

## Sheet: HVAEP1_annotation
Hydra vulgaris Gene ID	Orthofinder Orthogroup	Bilaterian Orthologs	Bilaterian Orthologs Ensembl IDs	Bilaterian Orthologs Ensembl Names	Hydra GenBank BLAST Hit	InterProScan PANTHER ID	InterProScan PANTHER Name	InterProScan Pfam ID	InterProScan Pfam Name	Uniprot BLAST Hit
HVAEP1_T000001.1	NA	NA	NA	NA	NA	PTHR47456:SF2	SI:DKEY-31C13.1	NA	NA	NA
HVAEP1_T000002.1	OG0000453	LIPE	ENSG00000079435	lipase E, hormone sensitive type	NA	PTHR23025	TRIACYLGLYCEROL LIPASE	PF07859; PF06350	alpha/beta hydrolase fold; Hormone-sensitive lipase (HSL) N-terminus	LIPS_MOUSE;Hormone-sensitive_lipase
HVAEP1_T000006.1	OG0002444	HIPK4, HIPK2, HIPK1, HIPK3	ENSG00000160396, ENSG00000064393, ENSG00000163349, ENSG00000110422	homeodomain interacting protein kinase 3, homeodomain interacting protein kinase 2, homeodomain interacting protein kinase 4, homeodomain interacting protein kinase 1	NA	NA	NA	NA	NA	NA
HVAEP1_T000008.2	NA	NA	NA	NA	NA	PTHR34825:SF1	CONSERVED PROTEIN, WITH A WEAK D-GALACTARATE DEHYDRATASE/ALTRONATE HYDROLASE DOMAIN	PF09820	Predicted AAA-ATPase	NA
HVAEP1_T000009.2	OG0000453	LIPE	ENSG00000079435	lipase E, hormone sensitive type	NA	PTHR23025	TRIACYLGLYCEROL LIPASE	PF06350; PF07859	Hormone-sensitive lipase (HSL) N-terminus; alpha/beta hydrolase fold	LIPS_MOUSE;Hormone-sensitive_lipase
HVAEP1_T000010.1	NA	NA	NA	NA	NA	NA	NA	PF00505	HMG (high mobility group) box	SOX7_XENLA;Transcription_factor_Sox-7
HVAEP1_T000012.1	OG0002695	RBBP5	ENSG00000117222	RB binding protein 5, histone lysine methyltransferase complex subunit	NA	PTHR44040	RETINOBLASTOMA-BINDING PROTEIN 5	PF00400	WD domain, G-beta repeat	RBBP5_HUMAN;Retinoblastoma-binding_protein_5
HVAEP1_T000020.1	OG0001134	VRTN	ENSG00000133980	vertebrae development associated	NA	NA	NA	NA	NA	NA
HVAEP1_T000022.1	NA	NA	NA	NA	NA	NA	NA	PF00531	Death domain	RIPK1_MOUSE;Receptor-interacting_serine/threonine-protein_kinase_1
HVAEP1_T000024.1	NA	NA	NA	NA	NA	NA	NA	PF00001	7 transmembrane receptor (rhodopsin family)	FMAR_DROME;FMRFamide_receptor
HVAEP1_T000026.1	OG0000802	PIH1D2	ENSG00000150773	PIH1 domain containing 2	NA	PTHR22997:SF6	PIH1 DOMAIN-CONTAINING PROTEIN 2	PF08190; PF18201	PIH1 N-terminal domain; PIH1 CS-like domain	PIHD2_HUMAN;PIH1_domain-containing_protein_2
HVAEP1_T000027.1	OG0004013	CFAP45	ENSG00000213085	cilia and flagella associated protein 45	NA	PTHR15504	NASOPHARYNGEAL EPITHELIUM SPECIFIC PROTEIN 1	PF13868	Trichohyalin-plectin-homology domain	CFA45_HUMAN;Cilia-_and_flagella-associated_protein_45
HVAEP1_T000029.1	NA	NA	NA	NA	NA	NA	NA	PF00078	Reverse transcriptase (RNA-dependent DNA polymerase)	RTXE_DROME;Probable_RNA-directed_DNA_polymerase_from_transposon_X-element
HVAEP1_T000030.1	OG0003115	DYM	ENSG00000141627	dymeclin	NA	PTHR12895:SF9	DYMECLIN	PF09742	Dyggve-Melchior-Clausen syndrome protein	DYM_XENLA;Dymeclin
HVAEP1_T000032.1	NA	NA	NA	NA	NA	NA	NA	PF01335	Death effector domain	NA
HVAEP1_T000037.1	NA	NA	NA	NA	NA	NA	NA	PF13424	Tetratricopeptide repeat	NA
HVAEP1_T000040.1	NA	NA	NA	NA	NA	NA	NA	NA	NA	RBBP5_HUMAN;Retinoblastoma-binding_protein_5
HVAEP1_T000041.1	NA	NA	NA	NA	NA	NA	NA	PF03184	DDE superfamily endonuclease	CLZ9_COCLU;MFS-type_transporter_clz9
HVAEP1_T000042.1	OG0002695	RBBP5	ENSG00000117222	RB binding protein 5, histone lysine methyltransferase complex subunit	NA	PTHR44040	RETINOBLASTOMA-BINDING PROTEIN 5	NA	NA	RBBP5_DROME;Retinoblastoma-binding_protein_5_homolog
HVAEP1_T000043.1	OG0002695	RBBP5	ENSG00000117222	RB binding protein 5, histone lysine methyltransferase complex subunit	NA	NA	NA	NA	NA	NA
HVAEP1_T000044.1	OG0002695	RBBP5	ENSG00000117222	RB binding protein 5, histone lysine methyltransferase complex subunit	NA	NA	NA	NA	NA	RBBP5_HUMAN;Retinoblastoma-binding_protein_5
HVAEP1_T000045.1	OG0002695	RBBP5	ENSG00000117222	RB binding protein 5, histone lysine methyltransferase complex subunit	NA	PTHR44040	RETINOBLASTOMA-BINDING PROTEIN 5	NA	NA	RBBP5_DROME;Retinoblastoma-binding_protein_5_homolog
HVAEP1_T000046.1	NA	NA	NA	NA	NA	NA	NA	NA	NA	POL_BAEVM;Gag-Pol_polyprotein
HVAEP1_T000048.1	NA	NA	NA	NA	NA	NA	NA	PF01335	Death effector domain	NA
HVAEP1_T000049.1	NA	NA	NA	NA	NA	NA	NA	PF05970	PIF1-like helicase	PIF1_XENLA;ATP-dependent_DNA_helicase_PIF1
HVAEP1_T000054.1	OG0000574	KMT5A	ENSG00000183955	lysine methyltransferase 5A	NA	PTHR46167	N-LYSINE METHYLTRANSFERASE KMT5A	NA	NA	NA
HVAEP1_T000056.2	NA	NA	NA	NA	NA	NA	NA	PF01335	Death effector domain	NA
HVAEP1_T000058.1	NA	NA	NA	NA	NA	PTHR44040	RETINOBLASTOMA-BINDING PROTEIN 5	NA	NA	RBBP5_HUMAN;Retinoblastoma-binding_protein_5
HVAEP1_T000060.1	OG0002023	RC3H2, RC3H1	ENSG00000056586, ENSG00000135870	ring finger and CCCH-type domains 2, ring finger and CCCH-type domains 1	NA	PTHR13139:SF54	LD12033P	PF18386	Roquin II domain	RC3H1_XENLA;Roquin-1
HVAEP1_T000061.1	OG0003115	DYM	ENSG00000141627	dymeclin	NA	NA	NA	PF09742	Dyggve-Melchior-Clausen syndrome protein	DYM_XENLA;Dymeclin
HVAEP1_T000063.1	OG0002023	RC3H2, RC3H1	ENSG00000056586, ENSG00000135870	ring finger and CCCH-type domains 2, ring finger and CCCH-type domains 1	NA	PTHR13139:SF54	LD12033P	NA	NA	RC3H2_MOUSE;Roquin-2
HVAEP1_T000064.1	OG0002023	RC3H2, RC3H1	ENSG00000056586, ENSG00000135870	ring finger and CCCH-type domains 2, ring finger and CCCH-type domains 1	NA	PTHR13139:SF54	LD12033P	PF18386	Roquin II domain	RC3H1_XENLA;Roquin-1
HVAEP1_T000070.1	NA	NA	NA	NA	NA	NA	NA	PF05485	THAP domain	NA
HVAEP1_T000073.1	OG0002695	RBBP5	ENSG00000117222	RB binding protein 5, histone lysine methyltransferase complex subunit	NA	NA	NA	NA	NA	NA
HVAEP1_T000074.1	NA	NA	NA	NA	NA	PTHR14819	GTP-BINDING	NA	NA	GVIN1_MOUSE;Interferon-induced_very_large_GTPase_1
HVAEP1_T000075.1	NA	NA	NA	NA	NA	PTHR22796:SF6	SI:DKEY-217F16.1-RELATED	PF00041; PF05879	Fibronectin type III domain; Root hair defective 3 GTP-binding protein (RHD3)	GVIN1_MOUSE;Interferon-induced_very_large_GTPase_1
HVAEP1_T000076.1	NA	NA	NA	NA	NA	NA	NA	PF13676	TIR domain	NA
HVAEP1_T000077.1	NA	NA	NA	NA	NA	NA	NA	PF03184	DDE superfamily endonuclease	CLZ9_COCLU;MFS-type_transporter_clz9
HVAEP1_T000078.1	NA	NA	NA	NA	NA	NA	NA	PF00078	Reverse transcriptase (RNA-dependent DNA polymerase)	RTXE_DROME;Probable_RNA-directed_DNA_polymerase_from_transposon_X-element
HVAEP1_T000079.1	NA	NA	NA	NA	NA	NA	NA	PF05485	THAP domain	NA
HVAEP1_T000081.1	NA	NA	NA	NA	NA	PTHR34153:SF8	SI:DKEY-65L23.2	PF16064	Domain of unknown function (DUF4806)	NA
HVAEP1_T000084.1	OG0002695	RBBP5	ENSG00000117222	RB binding protein 5, histone lysine methyltransferase complex subunit	NA	NA	NA	NA	NA	RBBP5_DROME;Retinoblastoma-binding_protein_5_homolog
HVAEP1_T000085.1	OG0002695	RBBP5	ENSG00000117222	RB binding protein 5, histone lysine methyltransferase complex subunit	NA	NA	NA	NA	NA	RBBP5_HUMAN;Retinoblastoma-binding_protein_5
HVAEP1_T000087.1	OG0002695	RBBP5	ENSG00000117222	RB binding protein 5, histone lysine methyltransferase complex subunit	NA	PTHR44040	RETINOBLASTOMA-BINDING PROTEIN 5	NA	NA	RBBP5_HUMAN;Retinoblastoma-binding_protein_5
HVAEP1_T000089.1	NA	NA	NA	NA	NA	NA	NA	PF16064	Domain of unknown function (DUF4806)	NA
HVAEP1_T000090.1	NA	NA	NA	NA	NA	NA	NA	PF00069	Protein kinase domain	GDT4_DICDI;Probable_serine/threonine-protein_kinase_gdt4
HVAEP1_T000092.1	NA	NA	NA	NA	NA	PTHR24203	ANKYRIN REPEAT FAMILY PROTEIN	PF12796	Ankyrin repeats (3 copies)	NA
HVAEP1_T000095.1	NA	NA	NA	NA	NA	PTHR24121:SF2	ANKYRIN REPEAT AND SOCS BOX PROTEIN 14	PF00023; PF13637; PF12796	Ankyrin repeat; Ankyrin repeats (many copies); Ankyrin repeats (3 copies)	ANR52_CHICK;Serine/threonine-protein_phosphatase_6_regulatory_ankyrin_repeat_subunit_C
HVAEP1_T000101.1	NA	NA	NA	NA	NA	PTHR24125	ANKYRIN REPEAT AND DEATH DOMAIN-CONTAINING PROTEIN	PF13637	Ankyrin repeats (many copies)	NA
HVAEP1_T000102.1	NA	NA	NA	NA	NA	NA	NA	PF12796; PF00023; PF13637	Ankyrin repeats (3 copies); Ankyrin repeat; Ankyrin repeats (many copies)	VPYL_MEDTR;Protein_VAPYRIN-LIKE
HVAEP1_T000107.1	NA	NA	NA	NA	NA	NA	NA	PF01335	Death effector domain	NA
HVAEP1_T000108.1	NA	NA	NA	NA	NA	NA	NA	PF00505	HMG (high mobility group) box	NA
HVAEP1_T000113.1	NA	NA	NA	NA	NA	NA	NA	PF13384	Homeodomain-like domain	NA
HVAEP1_T000114.2	NA	NA	NA	NA	NA	NA	NA	PF00041; PF13676	Fibronectin type III domain; TIR domain	NA
HVAEP1_T000115.1	NA	NA	NA	NA	NA	NA	NA	PF03184	DDE superfamily endonuclease	CLZ9_COCLU;MFS-type_transporter_clz9
HVAEP1_T000117.1	NA	NA	NA	NA	NA	NA	NA	NA	NA	TC1A_CAEEL;Transposable_element_Tc1_transposase
HVAEP1_T000118.1	NA	NA	NA	NA	NA	PTHR46218	LASP	PF00412	LIM domain	LNEBL_MOUSE;LIM_zinc-binding_domain-containing_Nebulette
HVAEP1_T000122.1	NA	NA	NA	NA	NA	NA	NA	PF02892	BED zinc finger	NA
HVAEP1_T000131.1	NA	NA	NA	NA	NA	NA	NA	PF00531	Death domain	NA
HVAEP1_T000136.1	NA	NA	NA	NA	NA	PTHR45641:SF1	TETRATRICOPEPTIDE REPEAT PROTEIN (AFU_ORTHOLOGUE AFUA_6G03870)	PF13424	Tetratricopeptide repeat	NA
HVAEP1_T000137.2	NA	NA	NA	NA	NA	NA	NA	PF13424	Tetratricopeptide repeat	NA
HVAEP1_T000138.1	NA	NA	NA	NA	NA	NA	NA	PF13424	Tetratricopeptide repeat	NA
HVAEP1_T000143.1	NA	NA	NA	NA	NA	PTHR33053:SF18	AGAP000105-PA	NA	NA	NA
HVAEP1_T000159.1	OG0002695	RBBP5	ENSG00000117222	RB binding protein 5, histone lysine methyltransferase complex subunit	NA	PTHR44040	RETINOBLASTOMA-BINDING PROTEIN 5	NA	NA	RBBP5_DROME;Retinoblastoma-binding_protein_5_homolog
HVAEP1_T000160.1	NA	NA	NA	NA	NA	NA	NA	PF01335	Death effector domain	NA
HVAEP1_T000167.1	NA	NA	NA	NA	NA	NA	NA	PF01335	Death effector domain	NA
HVAEP1_T000171.1	OG0001182	SAMD3	ENSG00000164483	sterile alpha motif domain containing 3	NA	NA	NA	NA	NA	NA
HVAEP1_T000173.1	NA	NA	NA	NA	NA	NA	NA	PF16064	Domain of unknown function (DUF4806)	NA
HVAEP1_T000175.1	NA	NA	NA	NA	NA	PTHR33053:SF18	AGAP000105-PA	NA	NA	NA
HVAEP1_T000177.1	NA	NA	NA	NA	NA	NA	NA	PF05699	hAT family C-terminal dimerisation region	NA
HVAEP1_T000179.1	NA	NA	NA	NA	NA	NA	NA	PF05699	hAT family C-terminal dimerisation region	NA
HVAEP1_T000180.1	NA	NA	NA	NA	NA	NA	NA	PF11175	Protein of unknown function (DUF2961)	NA
HVAEP1_T000182.1	OG0002695	RBBP5	ENSG00000117222	RB binding protein 5, histone lysine methyltransferase complex subunit	NA	NA	NA	NA	NA	NA
HVAEP1_T000183.1	OG0002695	RBBP5	ENSG00000117222	RB binding protein 5, histone lysine methyltransferase complex subunit	NA	PTHR44040	RETINOBLASTOMA-BINDING PROTEIN 5	NA	NA	RBBP5_DROME;Retinoblastoma-binding_protein_5_homolog
HVAEP1_T000184.1	NA	NA	NA	NA	NA	NA	NA	PF15299	Amyotrophic lateral sclerosis 2 chromosomal region candidate gene 8	NA
HVAEP1_T000186.1	OG0000026	CG14478	FBgn0028953	NA	NA	NA	NA	PF01498	Transposase	TCB2_CAEBR;Transposable_element_Tcb2_transposase
HVAEP1_T000187.1	NA	NA	NA	NA	NA	NA	NA	PF01335	Death effector domain	NA
HVAEP1_T000190.1	OG0000007	ZMYM1	ENSG00000197056	zinc finger MYM-type containing 1	NA	NA	NA	NA	NA	NA
HVAEP1_T000191.1	NA	NA	NA	NA	NA	PTHR45749:SF11	AC-LIKE TRANSPOSASE-RELATED	PF14291	Domain of unknown function (DUF4371)	ZMYM1_HUMAN;Zinc_finger_MYM-type_protein_1
HVAEP1_T000193.1	OG0003115	DYM	ENSG00000141627	dymeclin	NA	NA	NA	NA	NA	NA
HVAEP1_T000194.1	NA	NA	NA	NA	NA	PTHR44040	RETINOBLASTOMA-BINDING PROTEIN 5	NA	NA	RBBP5_DROME;Retinoblastoma-binding_protein_5_homolog
HVAEP1_T000199.1	NA	NA	NA	NA	NA	PTHR33395	TRANSCRIPTASE, PUTATIVE-RELATED-RELATED	PF14529	Endonuclease-reverse transcriptase	NA
HVAEP1_T000200.2	NA	NA	NA	NA	NA	PTHR33053:SF18	AGAP000105-PA	NA	NA	NA
HVAEP1_T000201.1	NA	NA	NA	NA	NA	PTHR33053:SF18	AGAP000105-PA	NA	NA	NA
HVAEP1_T000204.1	NA	NA	NA	NA	NA	PTHR10725:SF32	DNA TRANSPOSASE THAP9	NA	NA	PELET_DROME;Transposable_element_P_transposase
HVAEP1_T000206.1	OG0000026	CG14478	FBgn0028953	NA	NA	NA	NA	PF01498	Transposase	TCB2_CAEBR;Transposable_element_Tcb2_transposase
HVAEP1_T000217.1	OG0002695	RBBP5	ENSG00000117222	RB binding protein 5, histone lysine methyltransferase complex subunit	NA	NA	NA	NA	NA	RBBP5_HUMAN;Retinoblastoma-binding_protein_5
HVAEP1_T000218.1	NA	NA	NA	NA	NA	PTHR45641:SF1	TETRATRICOPEPTIDE REPEAT PROTEIN (AFU_ORTHOLOGUE AFUA_6G03870)	PF13424	Tetratricopeptide repeat	NA
HVAEP1_T000222.1	OG0001182	SAMD3	ENSG00000164483	sterile alpha motif domain containing 3	NA	NA	NA	NA	NA	NA
HVAEP1_T000223.1	NA	NA	NA	NA	NA	NA	NA	PF05485	THAP domain	NA
HVAEP1_T000224.1	OG0002695	RBBP5	ENSG00000117222	RB binding protein 5, histone lysine methyltransferase complex subunit	NA	PTHR44040	RETINOBLASTOMA-BINDING PROTEIN 5	NA	NA	RBBP5_HUMAN;Retinoblastoma-binding_protein_5
HVAEP1_T000228.1	OG0000341	RNF4	ENSG00000063978	ring finger protein 4	NA	PTHR23041	RING FINGER DOMAIN-CONTAINING	PF14634	zinc-RING finger domain	RNF4_HUMAN;E3_ubiquitin-protein_ligase_RNF4
HVAEP1_T000232.1	NA	NA	NA	NA	NA	PTHR24106	NACHT, LRR AND CARD DOMAINS-CONTAINING	PF05729	NACHT domain	NAL12_HUMAN;NACHT,_LRR_and_PYD_domains-containing_protein_12
HVAEP1_T000235.1	NA	NA	NA	NA	NA	PTHR24095:SF126	ACETYL-COENZYME A SYNTHETASE, CYTOPLASMIC	NA	NA	ACSA_DROME;Acetyl-coenzyme_A_synthetase
HVAEP1_T000238.1	NA	NA	NA	NA	NA	PTHR22796:SF13	UP-REGULATOR OF CELL PROLIFERATION	NA	NA	GVIN1_MOUSE;Interferon-induced_very_large_GTPase_1
HVAEP1_T000239.1	NA	NA	NA	NA	NA	PTHR22796:SF6	SI:DKEY-217F16.1-RELATED	NA	NA	NA
HVAEP1_T000240.1	NA	NA	NA	NA	NA	PTHR22796:SF6	SI:DKEY-217F16.1-RELATED	NA	NA	GVIN1_MOUSE;Interferon-induced_very_large_GTPase_1
HVAEP1_T000241.1	NA	NA	NA	NA	NA	PTHR14819	GTP-BINDING	NA	NA	GVIN1_MOUSE;Interferon-induced_very_large_GTPase_1
HVAEP1_T000242.1	OG0000218	LASP1	ENSG00000002834	LIM and SH3 protein 1	NA	PTHR46218	LASP	PF00412	LIM domain	LNEBL_MOUSE;LIM_zinc-binding_domain-containing_Nebulette
HVAEP1_T000245.1	NA	NA	NA	NA	NA	NA	NA	PF02892	BED zinc finger	NA
HVAEP1_T000249.1	NA	NA	NA	NA	NA	NA	NA	PF01335	Death effector domain	NA
HVAEP1_T000250.1	NA	NA	NA	NA	NA	PTHR47526	ATP-DEPENDENT DNA HELICASE	PF02037	SAP domain	NA
HVAEP1_T000252.1	NA	NA	NA	NA	NA	PTHR33309:SF5	MICROSOMAL DIPEPTIDASE FAMILY PROTEIN	NA	NA	NA
HVAEP1_T000254.1	NA	NA	NA	NA	NA	NA	NA	PF05225	helix-turn-helix, Psq domain	NA
HVAEP1_T000256.1	OG0002356	CG17078	FBgn0086855	NA	NA	PTHR31912:SF31	SI:CH211-111E20.1-RELATED	NA	NA	NA
HVAEP1_T000257.1	NA	NA	NA	NA	NA	PTHR31912:SF32	ZINC FINGER, C2H2 TYPE DOMAINCONTAINING PROTEIN	NA	NA	NA
HVAEP1_T000258.1	NA	NA	NA	NA	NA	NA	NA	PF05225	helix-turn-helix, Psq domain	NA
HVAEP1_T000261.1	NA	NA	NA	NA	NA	NA	NA	PF00505	HMG (high mobility group) box	SOX7_XENLA;Transcription_factor_Sox-7
HVAEP1_T000262.1	NA	NA	NA	NA	NA	NA	NA	PF01335	Death effector domain	NA
HVAEP1_T000264.1	NA	NA	NA	NA	NA	PTHR34825:SF1	CONSERVED PROTEIN, WITH A WEAK D-GALACTARATE DEHYDRATASE/ALTRONATE HYDROLASE DOMAIN	PF09820	Predicted AAA-ATPase	NA
HVAEP1_T000267.3	NA	NA	NA	NA	NA	NA	NA	PF13424	Tetratricopeptide repeat	NA
HVAEP1_T000271.1	NA	NA	NA	NA	NA	NA	NA	PF00531	Death domain	NA
HVAEP1_T000272.1	OG0002023	RC3H2, RC3H1	ENSG00000056586, ENSG00000135870	ring finger and CCCH-type domains 2, ring finger and CCCH-type domains 1	NA	NA	NA	NA	NA	NA
HVAEP1_T000273.1	OG0002023	RC3H2, RC3H1	ENSG00000056586, ENSG00000135870	ring finger and CCCH-type domains 2, ring finger and CCCH-type domains 1	NA	PTHR13139:SF54	LD12033P	PF18386	Roquin II domain	RC3H1_XENLA;Roquin-1
HVAEP1_T000279.1	OG0003115	DYM	ENSG00000141627	dymeclin	NA	NA	NA	NA	NA	NA
HVAEP1_T000281.1	OG0002695	RBBP5	ENSG00000117222	RB binding protein 5, histone lysine methyltransferase complex subunit	NA	NA	NA	NA	NA	RBBP5_HUMAN;Retinoblastoma-binding_protein_5
HVAEP1_T000284.1	NA	NA	NA	NA	NA	PTHR33053:SF18	AGAP000105-PA	NA	NA	NA
HVAEP1_T000293.1	OG0002695	RBBP5	ENSG00000117222	RB binding protein 5, histone lysine methyltransferase complex subunit	NA	PTHR44040	RETINOBLASTOMA-BINDING PROTEIN 5	PF00400	WD domain, G-beta repeat	RBBP5_DROME;Retinoblastoma-binding_protein_5_homolog
HVAEP1_T000294.1	OG0002695	RBBP5	ENSG00000117222	RB binding protein 5, histone lysine methyltransferase complex subunit	NA	PTHR44040	RETINOBLASTOMA-BINDING PROTEIN 5	NA	NA	RBBP5_DROME;Retinoblastoma-binding_protein_5_homolog
HVAEP1_T000295.2	NA	NA	NA	NA	NA	PTHR14819	GTP-BINDING	PF05879	Root hair defective 3 GTP-binding protein (RHD3)	GVIN1_MOUSE;Interferon-induced_very_large_GTPase_1
HVAEP1_T000299.2	NA	NA	NA	NA	NA	NA	NA	PF01335	Death effector domain	NA
HVAEP1_T000301.1	OG0000802	PIH1D2	ENSG00000150773	PIH1 domain containing 2	NA	NA	NA	PF18201	PIH1 CS-like domain	PIHD2_XENTR;PIH1_domain-containing_protein_2
HVAEP1_T000302.1	OG0000802	PIH1D2	ENSG00000150773	PIH1 domain containing 2	NA	NA	NA	NA	NA	NA
HVAEP1_T000303.1	OG0003115	DYM	ENSG00000141627	dymeclin	NA	NA	NA	PF09742	Dyggve-Melchior-Clausen syndrome protein	DYM_XENLA;Dymeclin
HVAEP1_T000305.1	OG0002695	RBBP5	ENSG00000117222	RB binding protein 5, histone lysine methyltransferase complex subunit	NA	NA	NA	NA	NA	RBBP5_HUMAN;Retinoblastoma-binding_protein_5
HVAEP1_T000306.1	OG0002695	RBBP5	ENSG00000117222	RB binding protein 5, histone lysine methyltransferase complex subunit	NA	NA	NA	NA	NA	RBBP5_HUMAN;Retinoblastoma-binding_protein_5
HVAEP1_T000308.1	OG0001182	SAMD3	ENSG00000164483	sterile alpha motif domain containing 3	NA	NA	NA	NA	NA	NA
HVAEP1_T000311.1	NA	NA	NA	NA	NA	NA	NA	PF05699	hAT family C-terminal dimerisation region	NA
HVAEP1_T000315.1	NA	NA	NA	NA	NA	NA	NA	PF14388	Domain of unknown function (DUF4419)	NA
HVAEP1_T000322.1	NA	NA	NA	NA	NA	PTHR34153:SF8	SI:DKEY-65L23.2	NA	NA	NA
HVAEP1_T000328.1	NA	NA	NA	NA	NA	NA	NA	PF05970	PIF1-like helicase	NA
HVAEP1_T000331.1	OG0001925	CG2617	FBgn0032877	NA	NA	NA	NA	PF13920	Zinc finger, C3HC4 type (RING finger)	IAP1_NPVAC;Apoptosis_inhibitor_1
HVAEP1_T000332.1	NA	NA	NA	NA	NA	PTHR45749:SF9	AC-LIKE TRANSPOSASE	NA	NA	NA
HVAEP1_T000338.2	OG0000128	CASP8, CASP10	ENSG00000064012, ENSG00000003400	caspase 10, caspase 8	NA	PTHR10454:SF209	CASPASE-18/A	PF00656	Caspase domain	CASPA_HUMAN;Caspase-10
HVAEP1_T000340.1	NA	NA	NA	NA	NA	NA	NA	NA	NA	HOBOT_DROME;Transposable_element_Hobo_transposase
HVAEP1_T000341.1	OG0000013	cdh-8	WBGene00017576	CaDHerin family	NA	NA	NA	NA	NA	NA
HVAEP1_T000342.1	OG0000574	KMT5A	ENSG00000183955	lysine methyltransferase 5A	NA	NA	NA	NA	NA	NA
HVAEP1_T000346.1	NA	NA	NA	NA	NA	NA	NA	PF05699	hAT family C-terminal dimerisation region	NA
HVAEP1_T000359.1	NA	NA	NA	NA	NA	PTHR47326	TRANSPOSABLE ELEMENT TC3 TRANSPOSASE-LIKE PROTEIN	PF16087	Helix-turn-helix domain (DUF4817)	NA
HVAEP1_T000361.2	NA	NA	NA	NA	NA	PTHR45749:SF9	AC-LIKE TRANSPOSASE	NA	NA	NA
HVAEP1_T000366.1	NA	NA	NA	NA	NA	NA	NA	PF14388	Domain of unknown function (DUF4419)	NA
HVAEP1_T000368.1	OG0000128	CASP8, CASP10	ENSG00000064012, ENSG00000003400	caspase 10, caspase 8	NA	PTHR10454:SF209	CASPASE-18/A	PF00656	Caspase domain	CASP7_MOUSE;Caspase-7
HVAEP1_T000378.1	NA	NA	NA	NA	NA	PTHR10725:SF51	SI:CH211-69L10.4	NA	NA	NA
HVAEP1_T000386.1	OG0000128	CASP8, CASP10	ENSG00000064012, ENSG00000003400	caspase 10, caspase 8	NA	PTHR10454:SF210	CASPASE-RELATED	PF00656	Caspase domain	CASP7_HUMAN;Caspase-7
HVAEP1_T000390.2	NA	NA	NA	NA	NA	PTHR45736:SF7	ZINC FINGER MYM-TYPE PROTEIN 5	NA	NA	ZMYM5_MACFA;Zinc_finger_MYM-type_protein_5
HVAEP1_T000391.1	NA	NA	NA	NA	NA	PTHR47326	TRANSPOSABLE ELEMENT TC3 TRANSPOSASE-LIKE PROTEIN	NA	NA	NA
HVAEP1_T000397.1	OG0002023	RC3H2, RC3H1	ENSG00000056586, ENSG00000135870	ring finger and CCCH-type domains 2, ring finger and CCCH-type domains 1	NA	PTHR13139:SF54	LD12033P	PF18386	Roquin II domain	RC3H1_MOUSE;Roquin-1
HVAEP1_T000398.1	NA	NA	NA	NA	NA	NA	NA	PF05485	THAP domain	NA
HVAEP1_T000401.1	NA	NA	NA	NA	NA	NA	NA	PF01335	Death effector domain	NA
HVAEP1_T000408.1	NA	NA	NA	NA	NA	NA	NA	PF00505	HMG (high mobility group) box	SOX7_XENLA;Transcription_factor_Sox-7
HVAEP1_T000410.1	OG0002023	RC3H2, RC3H1	ENSG00000056586, ENSG00000135870	ring finger and CCCH-type domains 2, ring finger and CCCH-type domains 1	NA	PTHR13139:SF54	LD12033P	PF18386	Roquin II domain	RC3H1_MOUSE;Roquin-1
HVAEP1_T000411.1	OG0002023	RC3H2, RC3H1	ENSG00000056586, ENSG00000135870	ring finger and CCCH-type domains 2, ring finger and CCCH-type domains 1	NA	NA	NA	NA	NA	NA
HVAEP1_T000418.1	NA	NA	NA	NA	NA	NA	NA	PF01335	Death effector domain	NA
HVAEP1_T000423.1	NA	NA	NA	NA	NA	PTHR46169:SF14	SIN3-HDAC COMPLEX-ASSOCIATED FACTOR,-LIKE-RELATED	PF02892	BED zinc finger	HOBOT_DROME;Transposable_element_Hobo_transposase
HVAEP1_T000424.1	OG0000057	C10A4.1, K09A11.1, B0545.4	WBGene00015662, WBGene00010704, WBGene00015247	hypothetical protein	NA	PTHR47611	HAT DIMERISATION DOMAIN, C-TERMINAL	PF05699	hAT family C-terminal dimerisation region	ZBED4_MOUSE;Zinc_finger_BED_domain-containing_protein_4
HVAEP1_T000425.1	NA	NA	NA	NA	NA	NA	NA	PF00531	Death domain	NA
HVAEP1_T000426.2	OG0002552	PPP2R1A, PPP2R1B	ENSG00000105568, ENSG00000137713	protein phosphatase 2 scaffold subunit Aalpha, protein phosphatase 2 scaffold subunit Abeta	NA	PTHR10648:SF9	SERINE/THREONINE-PROTEIN PHOSPHATASE 2A 65 KDA REGULATORY SUBUNIT A BETA ISOFORM	PF13646; PF02985	HEAT repeats; HEAT repeat	2AAA_BOVIN;Serine/threonine-protein_phosphatase_2A_65_kDa_regulatory_subunit_A_alpha_isoform
HVAEP1_T000428.1	OG0002023	RC3H2, RC3H1	ENSG00000056586, ENSG00000135870	ring finger and CCCH-type domains 2, ring finger and CCCH-type domains 1	NA	PTHR13139:SF54	LD12033P	NA	NA	RC3H1_XENLA;Roquin-1
HVAEP1_T000429.1	NA	NA	NA	NA	NA	NA	NA	PF16064	Domain of unknown function (DUF4806)	NA
HVAEP1_T000431.1	NA	NA	NA	NA	NA	PTHR23257:SF706	PROTO-ONCOGENE SERINE/THREONINE-PROTEIN KINASE MOS	PF07714	Protein tyrosine and serine/threonine kinase	GDT4_DICDI;Probable_serine/threonine-protein_kinase_gdt4
HVAEP1_T000435.1	OG0002708	ARHGAP31, ARHGAP30, ARHGAP33, ARHGAP32	ENSG00000031081, ENSG00000186517, ENSG00000004777, ENSG00000134909	Rho GTPase activating protein 33, Rho GTPase activating protein 31, Rho GTPase activating protein 32, Rho GTPase activating protein 30	NA	PTHR15729:SF10	GTPASE-ACTIVATING PROTEIN CDGAPR	PF00620; PF14604	RhoGAP domain; Variant SH3 domain	RHG32_XENLA;Rho_GTPase-activating_protein_32
HVAEP1_T000436.1	OG0002708	ARHGAP31, ARHGAP30, ARHGAP33, ARHGAP32	ENSG00000031081, ENSG00000186517, ENSG00000004777, ENSG00000134909	Rho GTPase activating protein 33, Rho GTPase activating protein 31, Rho GTPase activating protein 32, Rho GTPase activating protein 30	NA	PTHR15729:SF10	GTPASE-ACTIVATING PROTEIN CDGAPR	NA	NA	CDGAP_DROME;GTPase-activating_protein_CdGAPr
HVAEP1_T000437.1	OG0002708	ARHGAP31, ARHGAP30, ARHGAP33, ARHGAP32	ENSG00000031081, ENSG00000186517, ENSG00000004777, ENSG00000134909	Rho GTPase activating protein 33, Rho GTPase activating protein 31, Rho GTPase activating protein 32, Rho GTPase activating protein 30	NA	NA	NA	NA	NA	NA
HVAEP1_T000439.1	OG0008213	TMEM218	ENSG00000150433	transmembrane protein 218	NA	NA	NA	NA	NA	NA
HVAEP1_T000440.2	NA	NA	NA	NA	NA	PTHR33053:SF18	AGAP000105-PA	NA	NA	NA
HVAEP1_T000441.1	NA	NA	NA	NA	NA	NA	NA	PF05225	helix-turn-helix, Psq domain	NA
HVAEP1_T000443.1	NA	NA	NA	NA	NA	NA	NA	PF00078	Reverse transcriptase (RNA-dependent DNA polymerase)	RTBS_DROME;Probable_RNA-directed_DNA_polymerase_from_transposon_BS
HVAEP1_T000447.1	NA	NA	NA	NA	NA	NA	NA	PF00531	Death domain	NA
HVAEP1_T000451.1	OG0002552	PPP2R1A, PPP2R1B	ENSG00000105568, ENSG00000137713	protein phosphatase 2 scaffold subunit Aalpha, protein phosphatase 2 scaffold subunit Abeta	NA	PTHR10648:SF9	SERINE/THREONINE-PROTEIN PHOSPHATASE 2A 65 KDA REGULATORY SUBUNIT A BETA ISOFORM	PF02985; PF13646	HEAT repeat; HEAT repeats	2AAA_BOVIN;Serine/threonine-protein_phosphatase_2A_65_kDa_regulatory_subunit_A_alpha_isoform
HVAEP1_T000452.1	NA	NA	NA	NA	NA	PTHR32166:SF81	HAT TRANSPOSON SUPERFAMILY PROTEIN	PF04937; PF05699	Protein of unknown function (DUF 659); hAT family C-terminal dimerisation region	NA
HVAEP1_T000453.1	OG0002023	RC3H2, RC3H1	ENSG00000056586, ENSG00000135870	ring finger and CCCH-type domains 2, ring finger and CCCH-type domains 1	NA	PTHR13139:SF6	ROQUIN-1	NA	NA	RC3H2_MOUSE;Roquin-2
HVAEP1_T000454.1	NA	NA	NA	NA	NA	NA	NA	PF00531	Death domain	NA
HVAEP1_T000457.1	OG0002708	ARHGAP31, ARHGAP30, ARHGAP33, ARHGAP32	ENSG00000031081, ENSG00000186517, ENSG00000004777, ENSG00000134909	Rho GTPase activating protein 33, Rho GTPase activating protein 31, Rho GTPase activating protein 32, Rho GTPase activating protein 30	NA	NA	NA	PF14604; PF00620	Variant SH3 domain; RhoGAP domain	RHG32_XENLA;Rho_GTPase-activating_protein_32
HVAEP1_T000458.1	OG0008213	TMEM218	ENSG00000150433	transmembrane protein 218	NA	NA	NA	NA	NA	NA
HVAEP1_T000459.1	NA	NA	NA	NA	NA	NA	NA	PF00041	Fibronectin type III domain	TENA_CHICK;Tenascin
HVAEP1_T000461.1	OG0001005	CG8132	FBgn0037687	NA	NA	PTHR23088:SF30	OMEGA-AMIDASE NIT2	PF00795	Carbon-nitrogen hydrolase	NIT2_XENTR;Omega-amidase_NIT2
HVAEP1_T000463.1	OG0002165	XB5767034	ENSXETG00000008182	putative serine protease K12H4.7	NA	PTHR11010:SF87	SERINE PROTEASE 16	PF05577	Serine carboxypeptidase S28	YM67_CAEEL;Putative_serine_protease_K12H4.7
HVAEP1_T000464.1	OG0004604	ZDHHC6	ENSG00000023041	zinc finger DHHC-type palmitoyltransferase 6	NA	PTHR22883:SF35	PALMITOYLTRANSFERASE ZDHHC6	PF01529	DHHC palmitoyltransferase	ZDHC6_DANRE;Palmitoyltransferase_ZDHHC6
HVAEP1_T000466.1	NA	NA	NA	NA	NA	NA	NA	PF00531	Death domain	NA
HVAEP1_T000469.1	NA	NA	NA	NA	NA	NA	NA	PF00531	Death domain	NA
HVAEP1_T000473.1	NA	NA	NA	NA	NA	NA	NA	PF00531	Death domain	NA
HVAEP1_T000474.1	NA	NA	NA	NA	NA	NA	NA	NA	NA	POL_BAEVM;Gag-Pol_polyprotein
HVAEP1_T000475.1	OG0002695	RBBP5	ENSG00000117222	RB binding protein 5, histone lysine methyltransferase complex subunit	NA	PTHR44040	RETINOBLASTOMA-BINDING PROTEIN 5	NA	NA	RBBP5_HUMAN;Retinoblastoma-binding_protein_5
HVAEP1_T000476.1	NA	NA	NA	NA	NA	PTHR47160:SF4	PROTEIN CBG17457	PF13920	Zinc finger, C3HC4 type (RING finger)	BIRC7_MOUSE;Baculoviral_IAP_repeat-containing_protein_7
HVAEP1_T000479.1	OG0002695	RBBP5	ENSG00000117222	RB binding protein 5, histone lysine methyltransferase complex subunit	NA	NA	NA	NA	NA	NA
HVAEP1_T000485.1	NA	NA	NA	NA	NA	NA	NA	PF02786	Carbamoyl-phosphate synthase L chain, ATP binding domain	MCCA_MOUSE;Methylcrotonoyl-CoA_carboxylase_subunit_alpha,_mitochondrial
HVAEP1_T000487.1	NA	NA	NA	NA	NA	NA	NA	PF13920	Zinc finger, C3HC4 type (RING finger)	BIRC7_MOUSE;Baculoviral_IAP_repeat-containing_protein_7
HVAEP1_T000488.1	OG0000678	MCCC1	ENSG00000078070	methylcrotonyl-CoA carboxylase subunit 1	NA	PTHR18866:SF33	METHYLCROTONOYL-COA CARBOXYLASE SUBUNIT ALPHA, MITOCHONDRIAL-RELATED	PF02785; PF00364; PF02786; PF00289	Biotin carboxylase C-terminal domain; Biotin-requiring enzyme; Carbamoyl-phosphate synthase L chain, ATP binding domain; Biotin carboxylase, N-terminal domain	MCCA_MOUSE;Methylcrotonoyl-CoA_carboxylase_subunit_alpha,_mitochondrial
HVAEP1_T000489.1	OG0004873	PPP1R11, PPP1R11, PPP1R11, PPP1R11, PPP1R11, PPP1R11, PPP1R11, PPP1R11	ENSG00000237829, ENSG00000237403, ENSG00000236560, ENSG00000233314, ENSG00000227720, ENSG00000206501, ENSG00000234058, ENSG00000204619	protein phosphatase 1 regulatory inhibitor subunit 11	NA	PTHR20835	E3 UBIQUITIN-PROTEIN LIGASE PPP1R11-RELATED	PF07491	Protein phosphatase inhibitor	PP1RB_XENTR;E3_ubiquitin-protein_ligase_PPP1R11
HVAEP1_T000490.1	OG0000155	DNAJC12	ENSG00000108176	DnaJ heat shock protein family (Hsp40) member C12	NA	PTHR44500	DNAJ HOMOLOG SUBFAMILY C MEMBER 12	PF00226	DnaJ domain	DJC12_RAT;DnaJ_homolog_subfamily_C_member_12
HVAEP1_T000492.1	NA	NA	NA	NA	NA	NA	NA	PF01522; PF01607	Polysaccharide deacetylase; Chitin binding Peritrophin-A domain	CDA1_BOMMO;Chitin_deacetylase_1
HVAEP1_T000499.1	NA	NA	NA	NA	NA	PTHR34153:SF8	SI:DKEY-65L23.2	PF16064	Domain of unknown function (DUF4806)	NA
HVAEP1_T000502.1	OG0000631	EFNA1, EFNA2, EFNA5, EFNA3, EFNA4, EFNB3, EFNB2, EFNB1	ENSG00000169242, ENSG00000099617, ENSG00000184349, ENSG00000143590, ENSG00000243364, ENSG00000108947, ENSG00000125266, ENSG00000090776	ephrin B2, ephrin B1, ephrin A2, ephrin A5, ephrin B3, ephrin A3, ephrin A4, ephrin A1	NA	NA	NA	NA	NA	NA
HVAEP1_T000505.1	NA	NA	NA	NA	NA	PTHR33053:SF18	AGAP000105-PA	NA	NA	NA
HVAEP1_T000508.1	NA	NA	NA	NA	NA	NA	NA	PF14291	Domain of unknown function (DUF4371)	NA
HVAEP1_T000509.1	OG0000128	CASP8, CASP10	ENSG00000064012, ENSG00000003400	caspase 10, caspase 8	NA	PTHR10454:SF210	CASPASE-RELATED	PF00656	Caspase domain	CASP3_PIG;Caspase-3
HVAEP1_T000511.1	NA	NA	NA	NA	NA	NA	NA	PF01335	Death effector domain	HOBOT_DROME;Transposable_element_Hobo_transposase
HVAEP1_T000512.1	NA	NA	NA	NA	NA	NA	NA	PF05699	hAT family C-terminal dimerisation region	ZBED1_HUMAN;E3_SUMO-protein_ligase_ZBED1
HVAEP1_T000514.1	OG0000316	KCNH6, KCNH2, KCNH7	ENSG00000173826, ENSG00000055118, ENSG00000184611	potassium voltage-gated channel subfamily H member 2, potassium voltage-gated channel subfamily H member 6, potassium voltage-gated channel subfamily H member 7	NA	PTHR10217:SF548	GH12235P	PF00027; PF00520	Cyclic nucleotide-binding domain; Ion transport protein	KCNH6_RAT;Potassium_voltage-gated_channel_subfamily_H_member_6
HVAEP1_T000516.1	OG0000316	KCNH6, KCNH2, KCNH7	ENSG00000173826, ENSG00000055118, ENSG00000184611	potassium voltage-gated channel subfamily H member 2, potassium voltage-gated channel subfamily H member 6, potassium voltage-gated channel subfamily H member 7	NA	PTHR10217:SF548	GH12235P	PF07885	Ion channel	KCNH2_CANLF;Potassium_voltage-gated_channel_subfamily_H_member_2
HVAEP1_T000517.1	OG0000316	KCNH6, KCNH2, KCNH7	ENSG00000173826, ENSG00000055118, ENSG00000184611	potassium voltage-gated channel subfamily H member 2, potassium voltage-gated channel subfamily H member 6, potassium voltage-gated channel subfamily H member 7	NA	PTHR10217:SF548	GH12235P	PF00027	Cyclic nucleotide-binding domain	UN103_CAEEL;Potassium_voltage-gated_channel_unc-103
HVAEP1_T000518.1	OG0000364	T05B9.2	WBGene00011465	hypothetical protein	NA	NA	NA	PF00024	PAN domain	NA
HVAEP1_T000519.1	NA	NA	NA	NA	NA	PTHR43647:SF5	DEHYDROGENASE/REDUCTASE-RELATED	PF00106	short chain dehydrogenase	TIC32_ARATH;Short-chain_dehydrogenase_TIC_32,_chloroplastic
HVAEP1_T000520.1	NA	NA	NA	NA	NA	PTHR43647:SF5	DEHYDROGENASE/REDUCTASE-RELATED	PF00106	short chain dehydrogenase	OXIR_STRAT;Probable_oxidoreductase
HVAEP1_T000522.1	NA	NA	NA	NA	NA	NA	NA	PF07498	Rho termination factor, N-terminal domain	NA
HVAEP1_T000528.1	NA	NA	NA	NA	NA	PTHR46082:SF6	ATP/GTP-BINDING PROTEIN-RELATED	PF13374	Tetratricopeptide repeat	NA
HVAEP1_T000530.1	NA	NA	NA	NA	NA	NA	NA	PF07498	Rho termination factor, N-terminal domain	NA
HVAEP1_T000539.1	NA	NA	NA	NA	NA	PTHR33309:SF5	MICROSOMAL DIPEPTIDASE FAMILY PROTEIN	NA	NA	NA
HVAEP1_T000540.1	NA	NA	NA	NA	NA	PTHR46289:SF3	52 KDA REPRESSOR OF THE INHIBITOR OF THE PROTEIN KINASE-LIKE PROTEIN	PF05699	hAT family C-terminal dimerisation region	NA
HVAEP1_T000541.1	NA	NA	NA	NA	NA	PTHR43647:SF5	DEHYDROGENASE/REDUCTASE-RELATED	PF00106	short chain dehydrogenase	RDH12_MOUSE;Retinol_dehydrogenase_12
HVAEP1_T000542.1	NA	NA	NA	NA	NA	PTHR43647:SF5	DEHYDROGENASE/REDUCTASE-RELATED	PF00106	short chain dehydrogenase	TIC32_ARATH;Short-chain_dehydrogenase_TIC_32,_chloroplastic
HVAEP1_T000549.1	NA	NA	NA	NA	NA	PTHR43647:SF5	DEHYDROGENASE/REDUCTASE-RELATED	NA	NA	PRX1_PENRF;Short-chain_dehydrogenase/reductase_prx1
HVAEP1_T000550.1	NA	NA	NA	NA	NA	PTHR43647:SF5	DEHYDROGENASE/REDUCTASE-RELATED	PF00106	short chain dehydrogenase	RDH12_MOUSE;Retinol_dehydrogenase_12
HVAEP1_T000552.1	NA	NA	NA	NA	NA	PTHR43647:SF5	DEHYDROGENASE/REDUCTASE-RELATED	PF00106	short chain dehydrogenase	TIC32_ARATH;Short-chain_dehydrogenase_TIC_32,_chloroplastic
HVAEP1_T000553.1	NA	NA	NA	NA	NA	PTHR18945:SF853	GAMMA-AMINOBUTYRIC ACID RECEPTOR SUBUNIT BETA-LIKE	PF02931; PF02932	Neurotransmitter-gated ion-channel ligand binding domain; Neurotransmitter-gated ion-channel transmembrane region	GBRB3_MOUSE;Gamma-aminobutyric_acid_receptor_subunit_beta-3
HVAEP1_T000555.1	NA	NA	NA	NA	NA	NA	NA	PF00628; PF01400	PHD-finger; Astacin (Peptidase family M12A)	NAS6_CAEEL;Zinc_metalloproteinase_nas-6
HVAEP1_T000556.1	NA	NA	NA	NA	NA	NA	NA	PF05485	THAP domain	THA11_DANRE;THAP_domain-containing_protein_11
HVAEP1_T000557.1	NA	NA	NA	NA	NA	NA	NA	PF01400	Astacin (Peptidase family M12A)	TLD_DROME;Dorsal-ventral_patterning_protein_tolloid
HVAEP1_T000558.1	OG0005521	RPS19	ENSG00000105372	ribosomal protein S19	DQ286051.1; ribosomal protein S19	PTHR11710:SF14	40S RIBOSOMAL PROTEIN S19-1-RELATED	PF01090	Ribosomal protein S19e	RS19_BRABE;40S_ribosomal_protein_S19
HVAEP1_T000559.2	OG0005861	EI24	ENSG00000149547	EI24 autophagy associated transmembrane protein	NA	PTHR21389	P53 INDUCED PROTEIN	PF07264	Etoposide-induced protein 2.4 (EI24)	EI24_HUMAN;Etoposide-induced_protein_2.4_homolog
HVAEP1_T000560.1	OG0006667	PEX2	ENSG00000164751	peroxisomal biogenesis factor 2	NA	PTHR23350:SF4	PEROXISOME BIOGENESIS FACTOR 2	PF04757; PF00097	Pex2 / Pex12 amino terminal region; Zinc finger, C3HC4 type (RING finger)	PEX2_RAT;Peroxisome_biogenesis_factor_2
HVAEP1_T000561.1	NA	NA	NA	NA	NA	PTHR10656:SF69	MAB-21 DOMAIN CONTAINING 2	PF03281	Mab-21 protein	M21D2_MOUSE;Protein_MB21D2
HVAEP1_T000563.1	NA	NA	NA	NA	NA	PTHR10656:SF69	MAB-21 DOMAIN CONTAINING 2	PF03281	Mab-21 protein	M21D2_MOUSE;Protein_MB21D2
HVAEP1_T000564.1	NA	NA	NA	NA	NA	PTHR10656:SF69	MAB-21 DOMAIN CONTAINING 2	PF03281	Mab-21 protein	M21D2_MOUSE;Protein_MB21D2
HVAEP1_T000574.2	OG0000271	MCF2L2, MCF2L, MCF2	ENSG00000053524, ENSG00000126217, ENSG00000101977	MCF.2 cell line derived transforming sequence like, MCF.2 cell line derived transforming sequence, MCF.2 cell line derived transforming sequence-like 2	NA	PTHR22826:SF201	GUANINE NUCLEOTIDE EXCHANGE FACTOR MCF2L2-RELATED	PF00621; PF00018	RhoGEF domain; SH3 domain	MCF2L_RAT;Guanine_nucleotide_exchange_factor_DBS
HVAEP1_T000575.1	OG0001217	ATG4A, ATG4B	ENSG00000101844, ENSG00000168397	autophagy related 4A cysteine peptidase, autophagy related 4B cysteine peptidase	NA	PTHR22624:SF39	CYSTEINE PROTEASE ATG4B	PF03416	Peptidase family C54	ATG4B_CHICK;Cysteine_protease_ATG4B
HVAEP1_T000576.1	OG0002233	pole-1	WBGene00009368	DNA polymerase epsilon catalytic subunit	NA	PTHR10670	DNA POLYMERASE EPSILON CATALYTIC SUBUNIT A	PF08490; PF03104; PF00136	Domain of unknown function (DUF1744); DNA polymerase family B, exonuclease domain; DNA polymerase family B	DPOE1_HUMAN;DNA_polymerase_epsilon_catalytic_subunit_A
HVAEP1_T000577.1	OG0002233	pole-1	WBGene00009368	DNA polymerase epsilon catalytic subunit	NA	PTHR10670	DNA POLYMERASE EPSILON CATALYTIC SUBUNIT A	PF08490	Domain of unknown function (DUF1744)	DPOE1_MOUSE;DNA_polymerase_epsilon_catalytic_subunit_A
HVAEP1_T000580.1	NA	NA	NA	NA	NA	PTHR36159	PROTEIN CBG23766	NA	NA	NA
HVAEP1_T000582.1	NA	NA	NA	NA	NA	PTHR19959	KINESIN LIGHT CHAIN	PF10335	Putative nucleotidyltransferase substrate binding domain	NA
HVAEP1_T000583.1	NA	NA	NA	NA	NA	PTHR19959	KINESIN LIGHT CHAIN	PF13424	Tetratricopeptide repeat	NA
HVAEP1_T000584.1	NA	NA	NA	NA	NA	PTHR19959	KINESIN LIGHT CHAIN	PF13424	Tetratricopeptide repeat	NA
HVAEP1_T000585.1	NA	NA	NA	NA	NA	PTHR19959	KINESIN LIGHT CHAIN	PF13181; PF12796	Tetratricopeptide repeat; Ankyrin repeats (3 copies)	ANFY1_MOUSE;Rabankyrin-5
HVAEP1_T000587.2	OG0004214	FLAD1	ENSG00000160688	flavin adenine dinucleotide synthetase 1	NA	PTHR23293:SF9	FAD SYNTHASE	PF01507	Phosphoadenosine phosphosulfate reductase family	FLAD1_XENLA;FAD_synthase
HVAEP1_T000590.1	NA	NA	NA	NA	NA	NA	NA	PF14388	Domain of unknown function (DUF4419)	NA
HVAEP1_T000591.1	NA	NA	NA	NA	NA	NA	NA	PF14388	Domain of unknown function (DUF4419)	YL662_MIMIV;Uncharacterized_protein_L662
HVAEP1_T000592.1	NA	NA	NA	NA	NA	NA	NA	PF14388	Domain of unknown function (DUF4419)	NA
HVAEP1_T000594.1	NA	NA	NA	NA	NA	NA	NA	PF00059	Lectin C-type domain	NA
HVAEP1_T000595.1	NA	NA	NA	NA	NA	NA	NA	PF14388	Domain of unknown function (DUF4419)	YL662_MIMIV;Uncharacterized_protein_L662
HVAEP1_T000596.1	NA	NA	NA	NA	NA	NA	NA	PF14388	Domain of unknown function (DUF4419)	YL662_MIMIV;Uncharacterized_protein_L662
HVAEP1_T000597.1	NA	NA	NA	NA	NA	PTHR18945:SF853	GAMMA-AMINOBUTYRIC ACID RECEPTOR SUBUNIT BETA-LIKE	PF02932; PF02931	Neurotransmitter-gated ion-channel transmembrane region; Neurotransmitter-gated ion-channel ligand binding domain	GBRB1_MOUSE;Gamma-aminobutyric_acid_receptor_subunit_beta-1
HVAEP1_T000600.1	NA	NA	NA	NA	NA	NA	NA	PF03184	DDE superfamily endonuclease	CLZ9_COCLU;MFS-type_transporter_clz9
HVAEP1_T000603.1	OG0000933	U2AF1, U2AF1L5, U2AF1L4	ENSG00000160201, ENSG00000275895, ENSG00000161265	U2 small nuclear RNA auxiliary factor 1, U2 small nuclear RNA auxiliary factor 1 like 5, U2 small nuclear RNA auxiliary factor 1 like 4	NA	PTHR12620:SF3	SPLICING FACTOR U2AF 26 KDA SUBUNIT	PF00076; PF00642	RNA recognition motif. (a.k.a. RRM, RBD, or RNP domain); Zinc finger C-x8-C-x5-C-x3-H type (and similar)	U2AF1_BOVIN;Splicing_factor_U2AF_35_kDa_subunit
HVAEP1_T000604.1	NA	NA	NA	NA	NA	NA	NA	PF10277	Frag1/DRAM/Sfk1 family	DRAM1_HUMAN;DNA_damage-regulated_autophagy_modulator_protein_1
HVAEP1_T000606.1	NA	NA	NA	NA	NA	PTHR47094:SF12	ELFLESS, ISOFORM B	PF14634	zinc-RING finger domain	RNF4_MOUSE;E3_ubiquitin-protein_ligase_RNF4
HVAEP1_T000609.1	NA	NA	NA	NA	NA	NA	NA	PF14388	Domain of unknown function (DUF4419)	NA
HVAEP1_T000613.1	OG0000128	CASP8, CASP10	ENSG00000064012, ENSG00000003400	caspase 10, caspase 8	NA	PTHR10454:SF210	CASPASE-RELATED	PF00656	Caspase domain	CASPA_HUMAN;Caspase-10
HVAEP1_T000614.1	NA	NA	NA	NA	NA	NA	NA	PF00531	Death domain	NA
HVAEP1_T000616.1	NA	NA	NA	NA	NA	NA	NA	PF00531	Death domain	NA
HVAEP1_T000619.1	NA	NA	NA	NA	NA	NA	NA	PF00531	Death domain	NA
HVAEP1_T000620.1	NA	NA	NA	NA	NA	NA	NA	PF00531	Death domain	NA
HVAEP1_T000628.1	NA	NA	NA	NA	NA	PTHR46169:SF15	DNA REPLICATION-RELATED ELEMENT FACTOR, ISOFORM A	PF05699	hAT family C-terminal dimerisation region	NA
HVAEP1_T000631.1	NA	NA	NA	NA	NA	NA	NA	PF15299	Amyotrophic lateral sclerosis 2 chromosomal region candidate gene 8	NA
HVAEP1_T000632.1	NA	NA	NA	NA	NA	NA	NA	PF00531	Death domain	NA
HVAEP1_T000639.1	NA	NA	NA	NA	NA	NA	NA	PF00531	Death domain	NA
HVAEP1_T000640.1	NA	NA	NA	NA	NA	NA	NA	PF14388	Domain of unknown function (DUF4419)	NA
HVAEP1_T000641.1	NA	NA	NA	NA	NA	NA	NA	PF00443	Ubiquitin carboxyl-terminal hydrolase	UBP2_RAT;Ubiquitin_carboxyl-terminal_hydrolase_2
HVAEP1_T000642.1	OG0001413	GNL2	ENSG00000134697	G protein nucleolar 2	NA	NA	NA	PF08153	NGP1NT (NUC091) domain	NOG2_MOUSE;Nucleolar_GTP-binding_protein_2
HVAEP1_T000643.1	OG0004040	CEP295	ENSG00000166004	centrosomal protein 295	NA	NA	NA	NA	NA	NA
HVAEP1_T000644.2	OG0004040	CEP295	ENSG00000166004	centrosomal protein 295	NA	PTHR21553:SF34	CENTROSOMAL PROTEIN 295	NA	NA	CE295_HUMAN;Centrosomal_protein_of_295_kDa
HVAEP1_T000645.1	OG0005327	Fis1	ENSMUSG00000019054	fission, mitochondrial 1	NA	PTHR13247:SF0	MITOCHONDRIAL FISSION 1 PROTEIN	PF14852; PF14853	Fis1 N-terminal tetratricopeptide repeat; Fis1 C-terminal tetratricopeptide repeat	FIS1_HUMAN;Mitochondrial_fission_1_protein
HVAEP1_T000647.2	OG0000235	CG2816	FBgn0031564	NA	AY225467.1; chordin-like protein	NA	NA	PF00014; PF09619; PF00093; PF00219	Kunitz/Bovine pancreatic trypsin inhibitor domain; Type III secretion system lipoprotein chaperone (YscW); von Willebrand factor type C domain; Insulin-like growth factor binding protein	KCP_XENLA;Kielin/chordin-like_protein
HVAEP1_T000649.1	NA	NA	NA	NA	NA	PTHR11046	OLIGORIBONUCLEASE, MITOCHONDRIAL	NA	NA	NA
HVAEP1_T000657.1	NA	NA	NA	NA	NA	NA	NA	NA	NA	TC1A_CAEEL;Transposable_element_Tc1_transposase
HVAEP1_T000659.1	OG0000007	ZMYM1	ENSG00000197056	zinc finger MYM-type containing 1	NA	NA	NA	NA	NA	NA
HVAEP1_T000662.1	OG0004553	C4orf33	ENSG00000151470	chromosome 4 open reading frame 33	NA	PTHR31475	UPF0462 PROTEIN	NA	NA	CD033_DANRE;UPF0462_protein_C4orf33_homolog
HVAEP1_T000663.1	NA	NA	NA	NA	NA	PTHR24060:SF134	METABOTROPIC GLUTAMATE RECEPTOR FAMILY	PF01094; PF00003	Receptor family ligand binding region; 7 transmembrane sweet-taste receptor of 3 GCPR	CASR_PIG;Extracellular_calcium-sensing_receptor
HVAEP1_T000665.1	NA	NA	NA	NA	NA	PTHR24060:SF134	METABOTROPIC GLUTAMATE RECEPTOR FAMILY	PF01094; PF00003	Receptor family ligand binding region; 7 transmembrane sweet-taste receptor of 3 GCPR	GRM5_HUMAN;Metabotropic_glutamate_receptor_5
HVAEP1_T000668.1	NA	NA	NA	NA	NA	PTHR24060:SF134	METABOTROPIC GLUTAMATE RECEPTOR FAMILY	PF01094; PF00003	Receptor family ligand binding region; 7 transmembrane sweet-taste receptor of 3 GCPR	GRM5_HUMAN;Metabotropic_glutamate_receptor_5
HVAEP1_T000671.1	NA	NA	NA	NA	NA	NA	NA	PF03184	DDE superfamily endonuclease	NA
HVAEP1_T000672.1	NA	NA	NA	NA	NA	NA	NA	PF00531	Death domain	NA
HVAEP1_T000675.1	NA	NA	NA	NA	NA	PTHR47326	TRANSPOSABLE ELEMENT TC3 TRANSPOSASE-LIKE PROTEIN	NA	NA	NA
HVAEP1_T000676.1	NA	NA	NA	NA	NA	PTHR47326	TRANSPOSABLE ELEMENT TC3 TRANSPOSASE-LIKE PROTEIN	PF16087	Helix-turn-helix domain (DUF4817)	NA
HVAEP1_T000678.1	NA	NA	NA	NA	NA	PTHR33053:SF18	AGAP000105-PA	NA	NA	NA
HVAEP1_T000680.1	OG0000007	ZMYM1	ENSG00000197056	zinc finger MYM-type containing 1	NA	NA	NA	NA	NA	NA
HVAEP1_T000682.1	NA	NA	NA	NA	NA	NA	NA	PF01094; PF00003	Receptor family ligand binding region; 7 transmembrane sweet-taste receptor of 3 GCPR	GRM3_MOUSE;Metabotropic_glutamate_receptor_3
HVAEP1_T000683.1	OG0000215	CG10431	FBgn0032730	NA	NA	PTHR46289:SF8	52 KDA REPRESSOR OF THE INHIBITOR OF THE PROTEIN KINASE	PF05485	THAP domain	P52K_MOUSE;52_kDa_repressor_of_the_inhibitor_of_the_protein_kinase
HVAEP1_T000684.1	NA	NA	NA	NA	NA	NA	NA	PF00069	Protein kinase domain	CHK2_HUMAN;Serine/threonine-protein_kinase_Chk2
HVAEP1_T000685.1	OG0000007	ZMYM1	ENSG00000197056	zinc finger MYM-type containing 1	NA	NA	NA	NA	NA	NA
HVAEP1_T000686.1	OG0000007	ZMYM1	ENSG00000197056	zinc finger MYM-type containing 1	NA	NA	NA	NA	NA	NA
HVAEP1_T000689.1	OG0000007	ZMYM1	ENSG00000197056	zinc finger MYM-type containing 1	NA	NA	NA	NA	NA	NA
HVAEP1_T000690.1	OG0000007	ZMYM1	ENSG00000197056	zinc finger MYM-type containing 1	NA	NA	NA	PF05699	hAT family C-terminal dimerisation region	NA
HVAEP1_T000695.1	NA	NA	NA	NA	NA	NA	NA	PF00531	Death domain	NA
HVAEP1_T000696.1	NA	NA	NA	NA	NA	NA	NA	NA	NA	HOBOT_DROME;Transposable_element_Hobo_transposase
HVAEP1_T000697.1	NA	NA	NA	NA	NA	NA	NA	PF16087	Helix-turn-helix domain (DUF4817)	NA
HVAEP1_T000702.1	OG0000007	ZMYM1	ENSG00000197056	zinc finger MYM-type containing 1	NA	PTHR46289:SF3	52 KDA REPRESSOR OF THE INHIBITOR OF THE PROTEIN KINASE-LIKE PROTEIN	PF05699	hAT family C-terminal dimerisation region	NA
HVAEP1_T000704.3	NA	NA	NA	NA	NA	NA	NA	PF00028	Cadherin domain	FAT4_HUMAN;Protocadherin_Fat_4
HVAEP1_T000707.1	OG0001246	CG31224	FBgn0051224	NA	NA	NA	NA	NA	NA	NA
HVAEP1_T000708.1	OG0001158	PAFAH1B3, PAFAH1B2	ENSG00000079462, ENSG00000168092	platelet activating factor acetylhydrolase 1b catalytic subunit 3, platelet activating factor acetylhydrolase 1b catalytic subunit 2	NA	PTHR11852:SF0	PLATELET-ACTIVATING FACTOR ACETYLHYDROLASE IB SUBUNIT BETA HOMOLOG	PF13472	GDSL-like Lipase/Acylhydrolase family	PA1B3_MOUSE;Platelet-activating_factor_acetylhydrolase_IB_subunit_alpha1
HVAEP1_T000709.1	NA	NA	NA	NA	NA	PTHR21092	NICASTRIN	PF18266; PF05450	Nicastrin small lobe; Nicastrin	NICA_RAT;Nicastrin
HVAEP1_T000710.1	NA	NA	NA	NA	NA	PTHR21301	REVERSE TRANSCRIPTASE	NA	NA	NA
HVAEP1_T000712.1	NA	NA	NA	NA	NA	PTHR21092	NICASTRIN	PF18266	Nicastrin small lobe	NICA_RAT;Nicastrin
HVAEP1_T000713.1	NA	NA	NA	NA	NA	PTHR21092	NICASTRIN	PF05450; PF18266	Nicastrin; Nicastrin small lobe	NICA_HUMAN;Nicastrin
HVAEP1_T000714.2	OG0001158	PAFAH1B3, PAFAH1B2	ENSG00000079462, ENSG00000168092	platelet activating factor acetylhydrolase 1b catalytic subunit 3, platelet activating factor acetylhydrolase 1b catalytic subunit 2	NA	PTHR11852:SF0	PLATELET-ACTIVATING FACTOR ACETYLHYDROLASE IB SUBUNIT BETA HOMOLOG	PF13472	GDSL-like Lipase/Acylhydrolase family	PA1B3_MOUSE;Platelet-activating_factor_acetylhydrolase_IB_subunit_alpha1
HVAEP1_T000717.2	NA	NA	NA	NA	NA	NA	NA	PF00531	Death domain	NA
HVAEP1_T000727.2	NA	NA	NA	NA	NA	NA	NA	PF00531	Death domain	NA
HVAEP1_T000732.1	NA	NA	NA	NA	NA	NA	NA	PF00531	Death domain	NA
HVAEP1_T000735.1	OG0001182	SAMD3	ENSG00000164483	sterile alpha motif domain containing 3	NA	NA	NA	NA	NA	NA
HVAEP1_T000736.1	OG0000574	KMT5A	ENSG00000183955	lysine methyltransferase 5A	NA	NA	NA	NA	NA	NA
HVAEP1_T000737.1	OG0000574	KMT5A	ENSG00000183955	lysine methyltransferase 5A	NA	NA	NA	NA	NA	KMT5A_MOUSE;N-lysine_methyltransferase_KMT5A
HVAEP1_T000740.1	NA	NA	NA	NA	NA	NA	NA	PF00531	Death domain	NA
HVAEP1_T000741.1	NA	NA	NA	NA	NA	NA	NA	PF00531	Death domain	NA
HVAEP1_T000745.1	NA	NA	NA	NA	NA	NA	NA	PF00531	Death domain	NA
HVAEP1_T000749.1	OG0004213	NCSTN	ENSG00000162736	nicastrin	NA	NA	NA	NA	NA	NA
HVAEP1_T000751.1	NA	NA	NA	NA	NA	NA	NA	PF00531	Death domain	NA
HVAEP1_T000752.1	OG0000829	COL4A4, COL4A2, COL4A6, COL4A1, COL4A5, COL4A3	ENSG00000081052, ENSG00000134871, ENSG00000197565, ENSG00000187498, ENSG00000188153, ENSG00000169031	collagen type IV alpha 2 chain, collagen type IV alpha 1 chain, collagen type IV alpha 5 chain, collagen type IV alpha 6 chain, collagen type IV alpha 4 chain, collagen type IV alpha 3 chain	GANC01000001.1; TSA: HYDRA_COL4_mRNA sequence	PTHR24023:SF1005	COLLAGEN ALPHA-1(IV) CHAIN	PF01413; PF01391	C-terminal tandem repeated domain in type 4 procollagen; Collagen triple helix repeat (20 copies)	CO4A2_ASCSU;Collagen_alpha-2(IV)_chain
HVAEP1_T000753.1	NA	NA	NA	NA	NA	PTHR19959	KINESIN LIGHT CHAIN	PF13181	Tetratricopeptide repeat	NA
HVAEP1_T000754.1	OG0001509	CBSL, CBS	ENSG00000274276, ENSG00000160200	cystathionine beta-synthase, cystathionine beta-synthase like	NA	PTHR10314:SF177	CYSTATHIONINE BETA-SYNTHASE-RELATED	PF00291; PF00571	Pyridoxal-phosphate dependent enzyme; CBS domain	CBSL_HUMAN;Cystathionine_beta-synthase-like_protein
HVAEP1_T000755.1	OG0001509	CBSL, CBS	ENSG00000274276, ENSG00000160200	cystathionine beta-synthase, cystathionine beta-synthase like	NA	PTHR10314:SF177	CYSTATHIONINE BETA-SYNTHASE-RELATED	PF00291	Pyridoxal-phosphate dependent enzyme	CBS_MOUSE;Cystathionine_beta-synthase
HVAEP1_T000757.1	NA	NA	NA	NA	NA	NA	NA	PF13424	Tetratricopeptide repeat	NA
HVAEP1_T000758.1	NA	NA	NA	NA	NA	NA	NA	PF13424	Tetratricopeptide repeat	NA
HVAEP1_T000759.1	NA	NA	NA	NA	NA	NA	NA	PF07498	Rho termination factor, N-terminal domain	NA
HVAEP1_T000760.1	NA	NA	NA	NA	NA	PTHR24023:SF980	COLLAGEN ALPHA-3(IV) CHAIN	PF01413; PF01391	C-terminal tandem repeated domain in type 4 procollagen; Collagen triple helix repeat (20 copies)	CO4A2_BOVIN;Collagen_alpha-2(IV)_chain_(Fragment)
HVAEP1_T000761.2	NA	NA	NA	NA	AF282902.1; type IV collagen alpha 1 chain precursor	NA	NA	PF01391	Collagen triple helix repeat (20 copies)	NA
HVAEP1_T000762.1	OG0000829	COL4A4, COL4A2, COL4A6, COL4A1, COL4A5, COL4A3	ENSG00000081052, ENSG00000134871, ENSG00000197565, ENSG00000187498, ENSG00000188153, ENSG00000169031	collagen type IV alpha 2 chain, collagen type IV alpha 1 chain, collagen type IV alpha 5 chain, collagen type IV alpha 6 chain, collagen type IV alpha 4 chain, collagen type IV alpha 3 chain	NA	PTHR24023:SF980	COLLAGEN ALPHA-3(IV) CHAIN	PF01413	C-terminal tandem repeated domain in type 4 procollagen	CO4A1_CAEEL;Collagen_alpha-1(IV)_chain
HVAEP1_T000763.1	NA	NA	NA	NA	DQ679810.1; collagen (col6)	PTHR24023:SF588	COLLAGEN ALPHA-2(IV) CHAIN	PF01413; PF01391	C-terminal tandem repeated domain in type 4 procollagen; Collagen triple helix repeat (20 copies)	CO4A1_BOVIN;Collagen_alpha-1(IV)_chain
HVAEP1_T000764.1	NA	NA	NA	NA	NA	NA	NA	PF13424	Tetratricopeptide repeat	NA
HVAEP1_T000769.1	OG0002831	GGCT	ENSG00000006625	gamma-glutamylcyclotransferase	NA	PTHR12935	UNCHARACTERIZED	PF06094	Gamma-glutamyl cyclotransferase, AIG2-like	GGCT_BOVIN;Gamma-glutamylcyclotransferase
HVAEP1_T000770.3	OG0002438	CBL, CBLB	ENSG00000110395, ENSG00000114423	Cbl proto-oncogene B, Cbl proto-oncogene	NA	PTHR23007:SF5	E3 UBIQUITIN-PROTEIN LIGASE CBL	PF02762; PF14447; PF02262; PF02761	CBL proto-oncogene N-terminus, SH2-like domain; Prokaryotic RING finger family 4; CBL proto-oncogene N-terminal domain 1; CBL proto-oncogene N-terminus, EF hand-like domain	CBL_HUMAN;E3_ubiquitin-protein_ligase_CBL
HVAEP1_T000771.1	OG0000288	UBE2K	ENSG00000078140	ubiquitin conjugating enzyme E2 K	NA	PTHR24068:SF147	UBIQUITIN-CONJUGATING ENZYME E2 K	PF00179	Ubiquitin-conjugating enzyme	UBCD4_DROME;Ubiquitin-conjugating_enzyme_E2-22_kDa
HVAEP1_T000772.1	OG0000332	PEX6	ENSG00000124587	peroxisomal biogenesis factor 6	NA	PTHR23077:SF9	PEROXISOME ASSEMBLY FACTOR 2	PF00004	ATPase family associated with various cellular activities (AAA)	PEX6_RAT;Peroxisome_assembly_factor_2
HVAEP1_T000775.1	NA	NA	NA	NA	MF805381.1; mAch receptor M13	NA	NA	PF00001	7 transmembrane receptor (rhodopsin family)	ACM1_RAT;Muscarinic_acetylcholine_receptor_M1
HVAEP1_T000776.2	OG0005070	CEP63, DEUP1	ENSG00000182923, ENSG00000165325	deuterosome assembly protein 1, centrosomal protein 63	NA	PTHR18875:SF7	CENTROSOMAL PROTEIN OF 63 KDA	PF17045	Centrosomal protein of 63 kDa	CEP63_PONAB;Centrosomal_protein_of_63_kDa
HVAEP1_T000778.1	NA	NA	NA	NA	NA	PTHR19303:SF30	AGAP001462-PA	PF03184	DDE superfamily endonuclease	CLZ9_COCLU;MFS-type_transporter_clz9
HVAEP1_T000782.1	OG0000739	SLC27A1, SLC27A4	ENSG00000130304, ENSG00000167114	solute carrier family 27 member 1, solute carrier family 27 member 4	NA	PTHR43107	LONG-CHAIN FATTY ACID TRANSPORT PROTEIN	PF00501	AMP-binding enzyme	S27A1_BOVIN;Long-chain_fatty_acid_transport_protein_1
HVAEP1_T000783.1	NA	NA	NA	NA	NA	PTHR11214:SF236	HEXOSYLTRANSFERASE	PF01762	Galactosyltransferase	B3GN2_HUMAN;N-acetyllactosaminide_beta-1,3-N-acetylglucosaminyltransferase_2
HVAEP1_T000784.1	NA	NA	NA	NA	NA	PTHR11214:SF236	HEXOSYLTRANSFERASE	PF01762	Galactosyltransferase	B3GT1_GORGO;Beta-1,3-galactosyltransferase_1
HVAEP1_T000785.1	OG0001398	GPC5, GPC3, GPC1, GPC2, GPC6, GPC4	ENSG00000179399, ENSG00000147257, ENSG00000063660, ENSG00000213420, ENSG00000183098, ENSG00000076716	glypican 5, glypican 6, glypican 4, glypican 3, glypican 2, glypican 1	NA	PTHR10822	GLYPICAN	PF01153	Glypican	GPC6_MOUSE;Glypican-6
HVAEP1_T000786.1	OG0006791	MSL2	ENSG00000174579	MSL complex subunit 2	NA	NA	NA	NA	NA	NA
HVAEP1_T000787.1	OG0003558	PCCB	ENSG00000114054	propionyl-CoA carboxylase subunit beta	NA	PTHR43842	PROPIONYL-COA CARBOXYLASE BETA CHAIN	PF01039	Carboxyl transferase domain	PCCB_MOUSE;Propionyl-CoA_carboxylase_beta_chain,_mitochondrial
HVAEP1_T000788.1	OG0006791	MSL2	ENSG00000174579	MSL complex subunit 2	NA	NA	NA	NA	NA	NA
HVAEP1_T000789.1	OG0006791	MSL2	ENSG00000174579	MSL complex subunit 2	NA	NA	NA	NA	NA	NA
HVAEP1_T000790.1	OG0003558	PCCB	ENSG00000114054	propionyl-CoA carboxylase subunit beta	NA	PTHR43842	PROPIONYL-COA CARBOXYLASE BETA CHAIN	PF01039	Carboxyl transferase domain	PCCB_HUMAN;Propionyl-CoA_carboxylase_beta_chain,_mitochondrial
HVAEP1_T000791.1	OG0003558	PCCB	ENSG00000114054	propionyl-CoA carboxylase subunit beta	NA	PTHR43842	PROPIONYL-COA CARBOXYLASE BETA CHAIN	PF01039	Carboxyl transferase domain	PCCB_MOUSE;Propionyl-CoA_carboxylase_beta_chain,_mitochondrial
HVAEP1_T000792.1	NA	NA	NA	NA	NA	NA	NA	PF14291	Domain of unknown function (DUF4371)	NA
HVAEP1_T000794.1	OG0002137	LRRC40	ENSG00000066557	leucine rich repeat containing 40	NA	PTHR16083:SF28	LEUCINE-RICH REPEAT-CONTAINING PROTEIN 40	PF13855	Leucine rich repeat	LRC40_MOUSE;Leucine-rich_repeat-containing_protein_40
HVAEP1_T000795.1	OG0000172	FSTL1	ENSG00000163430	follistatin like 1	NA	PTHR10913:SF13	FOLLISTATIN-RELATED PROTEIN 1	PF07648	Kazal-type serine protease inhibitor domain	FSTL1_BOVIN;Follistatin-related_protein_1
HVAEP1_T000796.1	OG0000319	ATP11A, ATP11C, ATP11B	ENSG00000068650, ENSG00000101974, ENSG00000058063	ATPase phospholipid transporting 11A, ATPase phospholipid transporting 11C, ATPase phospholipid transporting 11B (putative)	NA	PTHR24092:SF68	PHOSPHOLIPID-TRANSPORTING ATPASE	PF16209; PF00122	Phospholipid-translocating ATPase N-terminal; E1-E2 ATPase	AT11C_MOUSE;Phospholipid-transporting_ATPase_11C
HVAEP1_T000797.1	OG0000319	ATP11A, ATP11C, ATP11B	ENSG00000068650, ENSG00000101974, ENSG00000058063	ATPase phospholipid transporting 11A, ATPase phospholipid transporting 11C, ATPase phospholipid transporting 11B (putative)	NA	PTHR24092:SF68	PHOSPHOLIPID-TRANSPORTING ATPASE	PF13246; PF00702	Cation transport ATPase (P-type); haloacid dehalogenase-like hydrolase	AT11B_RABIT;Phospholipid-transporting_ATPase_IF_(Fragment)
HVAEP1_T000798.2	OG0000319	ATP11A, ATP11C, ATP11B	ENSG00000068650, ENSG00000101974, ENSG00000058063	ATPase phospholipid transporting 11A, ATPase phospholipid transporting 11C, ATPase phospholipid transporting 11B (putative)	NA	PTHR24092:SF68	PHOSPHOLIPID-TRANSPORTING ATPASE	PF16212; PF00702	Phospholipid-translocating P-type ATPase C-terminal; haloacid dehalogenase-like hydrolase	AT11B_MOUSE;Phospholipid-transporting_ATPase_IF
HVAEP1_T000799.1	NA	NA	NA	NA	NA	NA	NA	PF13374	Tetratricopeptide repeat	NA
HVAEP1_T000801.1	NA	NA	NA	NA	NA	NA	NA	PF15299	Amyotrophic lateral sclerosis 2 chromosomal region candidate gene 8	NA
HVAEP1_T000802.1	NA	NA	NA	NA	NA	NA	NA	PF03184	DDE superfamily endonuclease	CLZ9_COCLU;MFS-type_transporter_clz9
HVAEP1_T000803.1	NA	NA	NA	NA	NA	NA	NA	PF13424	Tetratricopeptide repeat	NA
HVAEP1_T000804.1	NA	NA	NA	NA	NA	PTHR45695:SF9	LEUCOKININ RECEPTOR-RELATED	NA	NA	NA
HVAEP1_T000807.1	NA	NA	NA	NA	NA	NA	NA	PF13424	Tetratricopeptide repeat	NA
HVAEP1_T000812.1	NA	NA	NA	NA	NA	NA	NA	PF13424	Tetratricopeptide repeat	NA
HVAEP1_T000818.1	NA	NA	NA	NA	NA	NA	NA	PF13424	Tetratricopeptide repeat	NA
HVAEP1_T000824.1	NA	NA	NA	NA	NA	NA	NA	PF13424	Tetratricopeptide repeat	NA
HVAEP1_T000826.1	NA	NA	NA	NA	NA	PTHR45641:SF1	TETRATRICOPEPTIDE REPEAT PROTEIN (AFU_ORTHOLOGUE AFUA_6G03870)	PF13181	Tetratricopeptide repeat	NA
HVAEP1_T000828.1	OG0003254	soc-2	WBGene00004929	Leucine-rich repeat protein soc-2	NA	NA	NA	NA	NA	NA
HVAEP1_T000829.1	OG0001470	RUNDC3A, RUNDC3B, RUFY3, RUFY2, RUFY1, RUFY1	ENSG00000108309, ENSG00000105784, ENSG00000018189, ENSG00000204130, ENSG00000284260, ENSG00000176783	RUN and FYVE domain containing 1, RUN and FYVE domain containing 3, RUN and FYVE domain containing 2, RUN domain containing 3B, RUN domain containing 3A	NA	NA	NA	NA	NA	RUFY2_MOUSE;RUN_and_FYVE_domain-containing_protein_2
HVAEP1_T000830.1	OG0001470	RUNDC3A, RUNDC3B, RUFY3, RUFY2, RUFY1, RUFY1	ENSG00000108309, ENSG00000105784, ENSG00000018189, ENSG00000204130, ENSG00000284260, ENSG00000176783	RUN and FYVE domain containing 1, RUN and FYVE domain containing 3, RUN and FYVE domain containing 2, RUN domain containing 3B, RUN domain containing 3A	NA	NA	NA	PF02759	RUN domain	RUFY3_RAT;Protein_RUFY3
HVAEP1_T000831.1	OG0001470	RUNDC3A, RUNDC3B, RUFY3, RUFY2, RUFY1, RUFY1	ENSG00000108309, ENSG00000105784, ENSG00000018189, ENSG00000204130, ENSG00000284260, ENSG00000176783	RUN and FYVE domain containing 1, RUN and FYVE domain containing 3, RUN and FYVE domain containing 2, RUN domain containing 3B, RUN domain containing 3A	NA	NA	NA	NA	NA	RUFY2_HUMAN;RUN_and_FYVE_domain-containing_protein_2
HVAEP1_T000832.2	OG0001203	SAMD9, SAMD9L	ENSG00000205413, ENSG00000177409	sterile alpha motif domain containing 9 like, sterile alpha motif domain containing 9	NA	PTHR16155:SF18	STERILE ALPHA MOTIF DOMAIN-CONTAINING PROTEIN 9-LIKE	NA	NA	SAM9L_MOUSE;Sterile_alpha_motif_domain-containing_protein_9-like
HVAEP1_T000835.1	NA	NA	NA	NA	NA	NA	NA	PF13374	Tetratricopeptide repeat	NA
HVAEP1_T000842.2	NA	NA	NA	NA	NA	PTHR45641:SF1	TETRATRICOPEPTIDE REPEAT PROTEIN (AFU_ORTHOLOGUE AFUA_6G03870)	PF13424	Tetratricopeptide repeat	NA
HVAEP1_T000843.1	OG0004041	IWS1	ENSG00000163166	interacts with SUPT6H, CTD assembly factor 1	NA	PTHR46010	PROTEIN IWS1 HOMOLOG	PF08711	TFIIS helical bundle-like domain	IWS1A_XENLA;Protein_IWS1_homolog_A
HVAEP1_T000844.1	OG0001958	ACADVL	ENSG00000072778	acyl-CoA dehydrogenase very long chain	NA	PTHR43884:SF11	VERY LONG-CHAIN SPECIFIC ACYL-COA DEHYDROGENASE, MITOCHONDRIAL	PF02771; PF00441; PF02770	Acyl-CoA dehydrogenase, N-terminal domain; Acyl-CoA dehydrogenase, C-terminal domain; Acyl-CoA dehydrogenase, middle domain	ACADV_BOVIN;Very_long-chain_specific_acyl-CoA_dehydrogenase,_mitochondrial
HVAEP1_T000845.1	NA	NA	NA	NA	NA	PTHR23055:SF70	HIPPOCALCIN-LIKE PROTEIN 4	PF13499	EF-hand domain pair	NCAH_DROME;Neurocalcin_homolog
HVAEP1_T000846.1	OG0003262	EFR3B, EFR3A	ENSG00000084710, ENSG00000132294	EFR3 homolog B, EFR3 homolog A	NA	NA	NA	NA	NA	EFR3B_HUMAN;Protein_EFR3_homolog_B
HVAEP1_T000847.1	NA	NA	NA	NA	NA	PTHR11214:SF236	HEXOSYLTRANSFERASE	PF01762	Galactosyltransferase	B3GT1_GORGO;Beta-1,3-galactosyltransferase_1
HVAEP1_T000848.1	NA	NA	NA	NA	NA	PTHR36970	UNNAMED PRODUCT	NA	NA	NA
HVAEP1_T000849.1	NA	NA	NA	NA	NA	PTHR36970	UNNAMED PRODUCT	NA	NA	NA
HVAEP1_T000850.2	NA	NA	NA	NA	NA	PTHR36970	UNNAMED PRODUCT	NA	NA	NA
HVAEP1_T000852.1	NA	NA	NA	NA	NA	NA	NA	NA	NA	GIN1_HUMAN;Gypsy_retrotransposon_integrase-like_protein_1
HVAEP1_T000854.1	NA	NA	NA	NA	NA	PTHR36970	UNNAMED PRODUCT	NA	NA	NA
HVAEP1_T000855.1	NA	NA	NA	NA	NA	PTHR12243:SF17	LD22971P-RELATED	PF02944; PF10545	BESS motif; Alcohol dehydrogenase transcription factor Myb/SANT-like	NA
HVAEP1_T000856.1	NA	NA	NA	NA	NA	NA	NA	PF05485	THAP domain	NA
HVAEP1_T000857.1	NA	NA	NA	NA	NA	PTHR36970	UNNAMED PRODUCT	NA	NA	NA
HVAEP1_T000858.1	NA	NA	NA	NA	NA	PTHR36970	UNNAMED PRODUCT	NA	NA	NA
HVAEP1_T000859.1	NA	NA	NA	NA	NA	NA	NA	PF00001	7 transmembrane receptor (rhodopsin family)	SSR5_RAT;Somatostatin_receptor_type_5
HVAEP1_T000860.1	NA	NA	NA	NA	NA	PTHR36970	UNNAMED PRODUCT	NA	NA	NA
HVAEP1_T000861.1	NA	NA	NA	NA	NA	PTHR24201:SF2	ANKYRIN REPEAT DOMAIN-CONTAINING PROTEIN 42	PF12796; PF13637	Ankyrin repeats (3 copies); Ankyrin repeats (many copies)	NA
HVAEP1_T000863.1	NA	NA	NA	NA	NA	PTHR45641:SF1	TETRATRICOPEPTIDE REPEAT PROTEIN (AFU_ORTHOLOGUE AFUA_6G03870)	PF13424	Tetratricopeptide repeat	NA
HVAEP1_T000865.1	OG0000061	ABCC6, ABCC6, ABCC1, ABCC1, ABCC3, ABCC2	ENSG00000275331, ENSG00000091262, ENSG00000278183, ENSG00000103222, ENSG00000108846, ENSG00000023839	ATP binding cassette subfamily C member 6, ATP binding cassette subfamily C member 1, ATP binding cassette subfamily C member 2, ATP binding cassette subfamily C member 3	NA	PTHR24223:SF176	CANALICULAR MULTISPECIFIC ORGANIC ANION TRANSPORTER 1	PF00664	ABC transporter transmembrane region	MRP2_RAT;ATP-binding_cassette_sub-family_C_member_2
HVAEP1_T000867.1	NA	NA	NA	NA	NA	NA	NA	PF13424	Tetratricopeptide repeat	NA
HVAEP1_T000872.1	NA	NA	NA	NA	NA	PTHR24201:SF2	ANKYRIN REPEAT DOMAIN-CONTAINING PROTEIN 42	PF12796	Ankyrin repeats (3 copies)	V034_FOWPN;Putative_ankyrin_repeat_protein_FPV034
HVAEP1_T000873.1	NA	NA	NA	NA	NA	PTHR33309:SF5	MICROSOMAL DIPEPTIDASE FAMILY PROTEIN	NA	NA	NA
HVAEP1_T000874.1	NA	NA	NA	NA	NA	PTHR45749:SF11	AC-LIKE TRANSPOSASE-RELATED	PF14291	Domain of unknown function (DUF4371)	NA
HVAEP1_T000875.1	NA	NA	NA	NA	NA	PTHR36970	UNNAMED PRODUCT	NA	NA	NA
HVAEP1_T000876.1	NA	NA	NA	NA	NA	PTHR45695:SF9	LEUCOKININ RECEPTOR-RELATED	PF00001	7 transmembrane receptor (rhodopsin family)	NPFF2_RAT;Neuropeptide_FF_receptor_2
HVAEP1_T000877.1	NA	NA	NA	NA	NA	PTHR36970	UNNAMED PRODUCT	NA	NA	NA
HVAEP1_T000878.1	NA	NA	NA	NA	NA	PTHR36970	UNNAMED PRODUCT	NA	NA	NA
HVAEP1_T000879.1	NA	NA	NA	NA	NA	PTHR36970	UNNAMED PRODUCT	NA	NA	NA
HVAEP1_T000880.1	NA	NA	NA	NA	NA	PTHR36970	UNNAMED PRODUCT	NA	NA	NA
HVAEP1_T000881.1	NA	NA	NA	NA	NA	PTHR36970	UNNAMED PRODUCT	NA	NA	NA
HVAEP1_T000883.1	NA	NA	NA	NA	NA	PTHR36970	UNNAMED PRODUCT	NA	NA	NA
HVAEP1_T000884.3	NA	NA	NA	NA	NA	PTHR36970	UNNAMED PRODUCT	NA	NA	NA
HVAEP1_T000885.1	NA	NA	NA	NA	NA	PTHR11214:SF236	HEXOSYLTRANSFERASE	PF01762	Galactosyltransferase	B3GT1_GORGO;Beta-1,3-galactosyltransferase_1
HVAEP1_T000886.1	OG0003262	EFR3B, EFR3A	ENSG00000084710, ENSG00000132294	EFR3 homolog B, EFR3 homolog A	NA	PTHR12444:SF8	PROTEIN EFR3 HOMOLOG CMP44E	NA	NA	EFR3B_DANRE;Protein_EFR3_homolog_B
HVAEP1_T000888.1	NA	NA	NA	NA	NA	NA	NA	PF13374	Tetratricopeptide repeat	NA
HVAEP1_T000890.1	NA	NA	NA	NA	NA	NA	NA	PF10523	BEN domain	NA
HVAEP1_T000893.1	NA	NA	NA	NA	NA	PTHR45641:SF1	TETRATRICOPEPTIDE REPEAT PROTEIN (AFU_ORTHOLOGUE AFUA_6G03870)	PF13424	Tetratricopeptide repeat	NA
HVAEP1_T000895.1	NA	NA	NA	NA	NA	NA	NA	PF01335	Death effector domain	NA
HVAEP1_T000896.1	NA	NA	NA	NA	NA	PTHR45641:SF1	TETRATRICOPEPTIDE REPEAT PROTEIN (AFU_ORTHOLOGUE AFUA_6G03870)	PF13424	Tetratricopeptide repeat	NA
HVAEP1_T000897.1	NA	NA	NA	NA	NA	PTHR36970	UNNAMED PRODUCT	NA	NA	NA
HVAEP1_T000900.1	NA	NA	NA	NA	NA	NA	NA	PF13424	Tetratricopeptide repeat	NA
HVAEP1_T000903.1	NA	NA	NA	NA	NA	NA	NA	PF13384	Homeodomain-like domain	NA
HVAEP1_T000904.1	NA	NA	NA	NA	NA	PTHR24060:SF134	METABOTROPIC GLUTAMATE RECEPTOR FAMILY	PF00003	7 transmembrane sweet-taste receptor of 3 GCPR	GRM8_RAT;Metabotropic_glutamate_receptor_8
HVAEP1_T000905.1	NA	NA	NA	NA	NA	PTHR24060:SF158	METABOTROPIC GLUTAMATE RECEPTOR	PF01094	Receptor family ligand binding region	GRM8_HUMAN;Metabotropic_glutamate_receptor_8
HVAEP1_T000906.1	NA	NA	NA	NA	NA	PTHR36970	UNNAMED PRODUCT	NA	NA	NA
HVAEP1_T000910.1	NA	NA	NA	NA	NA	NA	NA	PF13424	Tetratricopeptide repeat	NA
HVAEP1_T000911.1	NA	NA	NA	NA	NA	PTHR45641:SF1	TETRATRICOPEPTIDE REPEAT PROTEIN (AFU_ORTHOLOGUE AFUA_6G03870)	PF13424	Tetratricopeptide repeat	NA
HVAEP1_T000913.1	NA	NA	NA	NA	NA	PTHR22955:SF60	PROTEIN CBG26950	PF17921	Integrase zinc binding domain	NA
HVAEP1_T000916.3	NA	NA	NA	NA	NA	PTHR45641:SF1	TETRATRICOPEPTIDE REPEAT PROTEIN (AFU_ORTHOLOGUE AFUA_6G03870)	PF13424	Tetratricopeptide repeat	NA
HVAEP1_T000918.1	NA	NA	NA	NA	NA	NA	NA	PF13424	Tetratricopeptide repeat	NA
HVAEP1_T000921.1	NA	NA	NA	NA	NA	NA	NA	PF13424	Tetratricopeptide repeat	NA
HVAEP1_T000926.1	NA	NA	NA	NA	NA	NA	NA	PF13424	Tetratricopeptide repeat	NA
HVAEP1_T000927.1	NA	NA	NA	NA	NA	NA	NA	PF13424	Tetratricopeptide repeat	NA
HVAEP1_T000932.1	NA	NA	NA	NA	NA	NA	NA	PF05485	THAP domain	NA
HVAEP1_T000935.1	NA	NA	NA	NA	NA	PTHR36970	UNNAMED PRODUCT	NA	NA	NA
HVAEP1_T000936.1	NA	NA	NA	NA	NA	NA	NA	PF00001	7 transmembrane receptor (rhodopsin family)	NPY1R_RAT;Neuropeptide_Y_receptor_type_1
HVAEP1_T000937.1	NA	NA	NA	NA	NA	NA	NA	PF00001	7 transmembrane receptor (rhodopsin family)	SSR2_PIG;Somatostatin_receptor_type_2
HVAEP1_T000938.1	NA	NA	NA	NA	NA	PTHR24230:SF75	ALLATOSTATIN A RECEPTOR 2, ISOFORM A	PF00001	7 transmembrane receptor (rhodopsin family)	OPN4A_GADMO;Melanopsin-A
HVAEP1_T000942.1	OG0003179	CDA	ENSG00000158825	cytidine deaminase	NA	PTHR11644	CYTIDINE DEAMINASE	PF00383	Cytidine and deoxycytidylate deaminase zinc-binding region	CDD_DICDI;Probable_cytidine_deaminase
HVAEP1_T000944.1	OG0003179	CDA	ENSG00000158825	cytidine deaminase	NA	PTHR11644	CYTIDINE DEAMINASE	PF00383	Cytidine and deoxycytidylate deaminase zinc-binding region	CDD_DICDI;Probable_cytidine_deaminase
HVAEP1_T000948.1	NA	NA	NA	NA	NA	NA	NA	PF05699	hAT family C-terminal dimerisation region	NA
HVAEP1_T000949.1	OG0000007	ZMYM1	ENSG00000197056	zinc finger MYM-type containing 1	NA	PTHR45749:SF11	AC-LIKE TRANSPOSASE-RELATED	PF14291	Domain of unknown function (DUF4371)	ZMYM1_HUMAN;Zinc_finger_MYM-type_protein_1
HVAEP1_T000950.1	NA	NA	NA	NA	NA	NA	NA	PF00001	7 transmembrane receptor (rhodopsin family)	OPN4_PHOSU;Melanopsin
HVAEP1_T000951.1	OG0008300	XB5838993	ENSXETG00000006330	provisional ortholog of chondroadherin	NA	NA	NA	PF00090; PF13855	Thrombospondin type 1 domain; Leucine rich repeat	TSP1_XENLA;Thrombospondin-1
HVAEP1_T000952.1	OG0006571	UBAC1	ENSG00000130560	UBA domain containing 1	NA	PTHR46738	UBIQUITIN-ASSOCIATED DOMAIN-CONTAINING PROTEIN 1	PF00627	UBA/TS-N domain	UBAC1_XENTR;Ubiquitin-associated_domain-containing_protein_1
HVAEP1_T000953.1	OG0001206	LMOD3, LMOD1, LMOD2, TMOD2, TMOD3, TMOD4, TMOD1	ENSG00000163380, ENSG00000163431, ENSG00000170807, ENSG00000128872, ENSG00000138594, ENSG00000163157, ENSG00000136842	tropomodulin 1, uncharacterized LOC112268148, tropomodulin 3, tropomodulin 2, leiomodin 2, leiomodin 3, leiomodin 1, tropomodulin 4	NA	NA	NA	NA	NA	TMOD1_RAT;Tropomodulin-1
HVAEP1_T000955.1	OG0002381	PPM1D	ENSG00000170836	protein phosphatase, Mg2+/Mn2+ dependent 1D	NA	PTHR47992:SF79	PROTEIN PHOSPHATASE 1D	PF00481	Protein phosphatase 2C	PPM1D_HUMAN;Protein_phosphatase_1D
HVAEP1_T000956.1	OG0000929	GNB2, GNB4, GNB3, GNB1	ENSG00000172354, ENSG00000114450, ENSG00000111664, ENSG00000078369	G protein subunit beta 3, G protein subunit beta 1, G protein subunit beta 2, G protein subunit beta 4	NA	PTHR19850:SF28	GUANINE NUCLEOTIDE-BINDING PROTEIN SUBUNIT BETA-4	PF00400	WD domain, G-beta repeat	GBB1_CAEBR;Guanine_nucleotide-binding_protein_subunit_beta-1
HVAEP1_T000959.1	OG0002491	BIN2, BIN1, AMPH	ENSG00000110934, ENSG00000136717, ENSG00000078053	amphiphysin, bridging integrator 2, bridging integrator 1	NA	NA	NA	PF03542	Tuberin	NA
HVAEP1_T000960.1	OG0002023	RC3H2, RC3H1	ENSG00000056586, ENSG00000135870	ring finger and CCCH-type domains 2, ring finger and CCCH-type domains 1	NA	PTHR13139:SF54	LD12033P	NA	NA	RC3H1_MOUSE;Roquin-1
HVAEP1_T000961.1	OG0002023	RC3H2, RC3H1	ENSG00000056586, ENSG00000135870	ring finger and CCCH-type domains 2, ring finger and CCCH-type domains 1	NA	NA	NA	NA	NA	RC3H1_MOUSE;Roquin-1
HVAEP1_T000963.1	OG0000692	GLB1L2, GLB1L3	ENSG00000149328, ENSG00000166105	galactosidase beta 1 like 2, galactosidase beta 1 like 3	NA	PTHR23421:SF53	BETA-GALACTOSIDASE-1-LIKE PROTEIN 2	PF01301	Glycosyl hydrolases family 35	GLBL2_MOUSE;Beta-galactosidase-1-like_protein_2
HVAEP1_T000972.1	NA	NA	NA	NA	NA	PTHR46082:SF6	ATP/GTP-BINDING PROTEIN-RELATED	PF13424	Tetratricopeptide repeat	NA
HVAEP1_T000975.1	NA	NA	NA	NA	NA	NA	NA	PF13424	Tetratricopeptide repeat	NA
HVAEP1_T000976.1	NA	NA	NA	NA	NA	NA	NA	PF13424	Tetratricopeptide repeat	NA
HVAEP1_T000978.1	NA	NA	NA	NA	NA	NA	NA	PF13424	Tetratricopeptide repeat	NA
HVAEP1_T000979.1	NA	NA	NA	NA	NA	NA	NA	PF13424	Tetratricopeptide repeat	NA
HVAEP1_T000980.1	NA	NA	NA	NA	NA	NA	NA	PF13424	Tetratricopeptide repeat	NA
HVAEP1_T000983.1	NA	NA	NA	NA	NA	PTHR45641:SF1	TETRATRICOPEPTIDE REPEAT PROTEIN (AFU_ORTHOLOGUE AFUA_6G03870)	PF13424	Tetratricopeptide repeat	NA
HVAEP1_T000986.1	NA	NA	NA	NA	NA	NA	NA	PF13374	Tetratricopeptide repeat	NA
HVAEP1_T000988.1	OG0002381	PPM1D	ENSG00000170836	protein phosphatase, Mg2+/Mn2+ dependent 1D	NA	PTHR47992:SF79	PROTEIN PHOSPHATASE 1D	PF00481	Protein phosphatase 2C	PPM1D_MOUSE;Protein_phosphatase_1D
HVAEP1_T000990.1	OG0000272	BMPR1B, BMPR1A	ENSG00000138696, ENSG00000107779	bone morphogenetic protein receptor type 1B, bone morphogenetic protein receptor type 1A	NA	PTHR23255:SF68	RECEPTOR PROTEIN SERINE/THREONINE KINASE	PF07714; PF01064	Protein tyrosine and serine/threonine kinase; Activin types I and II receptor domain	BMR1A_HUMAN;Bone_morphogenetic_protein_receptor_type-1A
HVAEP1_T000993.2	OG0006831	POLD3	ENSG00000077514	DNA polymerase delta 3, accessory subunit	NA	PTHR17598	DNA POLYMERASE DELTA SUBUNIT 3	PF09507	DNA polymerase subunit Cdc27	DPOD3_CHICK;DNA_polymerase_delta_subunit_3
HVAEP1_T000995.1	NA	NA	NA	NA	NA	PTHR11360:SF270	IP12869P	PF07690	Major Facilitator Superfamily	MOT10_MOUSE;Monocarboxylate_transporter_10
HVAEP1_T000996.1	NA	NA	NA	NA	NA	NA	NA	PF04548	AIG1 family	NA
HVAEP1_T000998.1	NA	NA	NA	NA	NA	NA	NA	PF13424	Tetratricopeptide repeat	NA
HVAEP1_T000999.1	NA	NA	NA	NA	NA	NA	NA	PF01926	50S ribosome-binding GTPase	NA
HVAEP1_T001003.1	NA	NA	NA	NA	NA	NA	NA	PF13424	Tetratricopeptide repeat	NA
HVAEP1_T001006.3	OG0002439	ATG16L1, ATG16L1, ATG16L2	ENSG00000281089, ENSG00000085978, ENSG00000168010	autophagy related 16 like 1, autophagy related 16 like 2	NA	PTHR19878:SF6	AUTOPHAGY-RELATED PROTEIN 16-1	PF08614; PF00400	Autophagy protein 16 (ATG16); WD domain, G-beta repeat	A16L1_HUMAN;Autophagy-related_protein_16-1
HVAEP1_T001010.1	NA	NA	NA	NA	NA	NA	NA	PF16064	Domain of unknown function (DUF4806)	NA
HVAEP1_T001016.1	NA	NA	NA	NA	NA	NA	NA	PF01498	Transposase	NA
HVAEP1_T001021.1	NA	NA	NA	NA	NA	NA	NA	PF04548	AIG1 family	NA
HVAEP1_T001027.1	NA	NA	NA	NA	NA	PTHR33053:SF18	AGAP000105-PA	NA	NA	NA
HVAEP1_T001030.1	NA	NA	NA	NA	NA	NA	NA	PF04548	AIG1 family	NA
HVAEP1_T001031.1	NA	NA	NA	NA	NA	NA	NA	PF04548	AIG1 family	NA
HVAEP1_T001032.3	OG0005516	MLYCD	ENSG00000103150	malonyl-CoA decarboxylase	NA	NA	NA	PF05292	Malonyl-CoA decarboxylase C-terminal domain	NA
HVAEP1_T001034.1	NA	NA	NA	NA	NA	PTHR31511:SF13	PROTEIN CBG24201	NA	NA	NA
HVAEP1_T001036.1	NA	NA	NA	NA	NA	NA	NA	PF13374	Tetratricopeptide repeat	NA
HVAEP1_T001037.1	OG0002439	ATG16L1, ATG16L1, ATG16L2	ENSG00000281089, ENSG00000085978, ENSG00000168010	autophagy related 16 like 1, autophagy related 16 like 2	NA	PTHR19878:SF6	AUTOPHAGY-RELATED PROTEIN 16-1	PF08614; PF00400	Autophagy protein 16 (ATG16); WD domain, G-beta repeat	A16L1_HUMAN;Autophagy-related_protein_16-1
HVAEP1_T001038.1	OG0005862	ARGLU1	ENSG00000134884	arginine and glutamate rich 1	NA	PTHR31711	ARGININE AND GLUTAMATE-RICH PROTEIN 1	PF15346	Arginine and glutamate-rich 1	NA
HVAEP1_T001039.1	OG0000957	CG3491, sno	FBgn0028887, FBgn0265630	NA	NA	PTHR12706:SF30	UNNAMED PRODUCT	PF13871; PF13872	C-terminal domain on Strawberry notch homologue; P-loop containing NTP hydrolase pore-1	SBNO1_RAT;Protein_strawberry_notch_homolog_1
HVAEP1_T001041.1	NA	NA	NA	NA	NA	PTHR45695:SF9	LEUCOKININ RECEPTOR-RELATED	PF00001	7 transmembrane receptor (rhodopsin family)	BRS3_MACMU;Bombesin_receptor_subtype-3
HVAEP1_T001042.1	NA	NA	NA	NA	NA	NA	NA	PF00001	7 transmembrane receptor (rhodopsin family)	RYAR_DROME;RYamide_receptor
HVAEP1_T001043.2	NA	NA	NA	NA	NA	NA	NA	PF00001	7 transmembrane receptor (rhodopsin family)	C5AR1_RAT;C5a_anaphylatoxin_chemotactic_receptor_1
HVAEP1_T001045.1	NA	NA	NA	NA	NA	NA	NA	PF00001	7 transmembrane receptor (rhodopsin family)	CXCR5_RAT;C-X-C_chemokine_receptor_type_5
HVAEP1_T001046.1	NA	NA	NA	NA	NA	PTHR45695:SF9	LEUCOKININ RECEPTOR-RELATED	PF00001	7 transmembrane receptor (rhodopsin family)	CXCR4_CALJA;C-X-C_chemokine_receptor_type_4
HVAEP1_T001047.1	OG0000007	ZMYM1	ENSG00000197056	zinc finger MYM-type containing 1	NA	NA	NA	PF14291; PF05699	Domain of unknown function (DUF4371); hAT family C-terminal dimerisation region	ZMYM1_HUMAN;Zinc_finger_MYM-type_protein_1
HVAEP1_T001049.1	NA	NA	NA	NA	NA	NA	NA	PF05699	hAT family C-terminal dimerisation region	NA
HVAEP1_T001051.1	NA	NA	NA	NA	NA	NA	NA	PF02892	BED zinc finger	NA
HVAEP1_T001058.1	OG0000252	DAZL, DAZ3, DAZ2, DAZ1, DAZ4	ENSG00000092345, ENSG00000187191, ENSG00000205944, ENSG00000188120, ENSG00000205916	deleted in azoospermia 4, deleted in azoospermia 3, deleted in azoospermia 1, deleted in azoospermia 2, deleted in azoospermia like	NA	NA	NA	NA	NA	NA
HVAEP1_T001060.1	OG0004603	BTBD7, BTBD7	ENSG00000277222, ENSG00000011114	BTB domain containing 7	NA	PTHR16064:SF3	BTB/POZ DOMAIN-CONTAINING PROTEIN 7	PF00651	BTB/POZ domain	BTBD7_HUMAN;BTB/POZ_domain-containing_protein_7
HVAEP1_T001061.1	NA	NA	NA	NA	NA	PTHR10514	ANGIOTENSIN-CONVERTING ENZYME	PF01401	Angiotensin-converting enzyme	ACE_CHICK;Angiotensin-converting_enzyme_(Fragment)
HVAEP1_T001063.3	OG0005859	INTS10	ENSG00000104613	integrator complex subunit 10	NA	PTHR16055	UNCHARACTERIZED	NA	NA	INT10_HUMAN;Integrator_complex_subunit_10
HVAEP1_T001064.1	OG0003359	TIMM10B	ENSG00000132286	translocase of inner mitochondrial membrane 10B	NA	PTHR13172:SF0	MITOCHONDRIAL IMPORT INNER MEMBRANE TRANSLOCASE SUBUNIT TIM10 B	PF02953	Tim10/DDP family zinc finger	T10B_PONAB;Mitochondrial_import_inner_membrane_translocase_subunit_Tim10_B
HVAEP1_T001065.1	OG0000220	UBA52	ENSG00000221983	ubiquitin A-52 residue ribosomal protein fusion product 1	NA	PTHR10666:SF342	UBIQUITIN-60S RIBOSOMAL PROTEIN L40	PF00240; PF01020	Ubiquitin family; Ribosomal L40e family	RL40_DROME;Ubiquitin-60S_ribosomal_protein_L40
HVAEP1_T001067.2	OG0000797	SORL1	ENSG00000137642	sortilin related receptor 1	AF159157.1; head-activator binding protein precursor (HAB)	PTHR12106:SF20	SORTILIN-RELATED RECEPTOR	PF00041; PF00058; PF15901; PF00057; PF15902	Fibronectin type III domain; Low-density lipoprotein receptor repeat class B; Sortilin, neurotensin receptor 3, C-terminal; Low-density lipoprotein receptor domain class A; Sortilin, neurotensin receptor 3,	SORL_MOUSE;Sortilin-related_receptor
HVAEP1_T001068.1	OG0000509	POLR2A, POLR2A	ENSG00000284832, ENSG00000181222	RNA polymerase II subunit A	NA	PTHR19376:SF56	DNA-DIRECTED RNA POLYMERASE SUBUNIT	PF04998; PF00623; PF04983; PF04992; PF04997; PF04990; PF05000; PF05001	RNA polymerase Rpb1, domain 5; RNA polymerase Rpb1, domain 2; RNA polymerase Rpb1, domain 3; RNA polymerase Rpb1, domain 6; RNA polymerase Rpb1, domain 1; RNA polymerase Rpb1, domain 7; RNA polymerase Rpb1, domain 4; RNA polymerase Rpb1 C-terminal repeat	RPB1_CRIGR;DNA-directed_RNA_polymerase_II_subunit_RPB1
HVAEP1_T001070.1	OG0001151	ASMT	ENSG00000196433	acetylserotonin O-methyltransferase	NA	PTHR11746:SF150	ACETYLSEROTONIN O-METHYLTRANSFERASE 2	PF00891; PF16864	O-methyltransferase domain; Dimerisation domain	TCMO_STRGA;Tetracenomycin_polyketide_synthesis_8-O-methyl_transferase_TcmO
HVAEP1_T001071.1	OG0001151	ASMT	ENSG00000196433	acetylserotonin O-methyltransferase	NA	PTHR11746:SF254	ACETYLSEROTONIN O-METHYLTRANSFERASE	PF16864; PF00891	Dimerisation domain; O-methyltransferase domain	TCMO_STRGA;Tetracenomycin_polyketide_synthesis_8-O-methyl_transferase_TcmO
HVAEP1_T001072.1	OG0001151	ASMT	ENSG00000196433	acetylserotonin O-methyltransferase	NA	NA	NA	PF00891	O-methyltransferase domain	AZIB2_STREG;3-hydroxy-5-methyl-1-naphthoate_3-O-methyltransferase
HVAEP1_T001074.1	OG0001151	ASMT	ENSG00000196433	acetylserotonin O-methyltransferase	NA	PTHR11746:SF150	ACETYLSEROTONIN O-METHYLTRANSFERASE 2	PF16864; PF00891	Dimerisation domain; O-methyltransferase domain	TCMO_STRGA;Tetracenomycin_polyketide_synthesis_8-O-methyl_transferase_TcmO
HVAEP1_T001075.1	OG0003069	DNAJC3	ENSG00000102580	DnaJ heat shock protein family (Hsp40) member C3	NA	PTHR44140:SF3	DNAJ HOMOLOG SUBFAMILY C MEMBER 3	PF13432; PF00226	Tetratricopeptide repeat; DnaJ domain	DNJC3_BOVIN;DnaJ_homolog_subfamily_C_member_3
HVAEP1_T001078.1	OG0000130	TCTE1	ENSG00000146221	t-complex-associated-testis-expressed 1	NA	NA	NA	NA	NA	NA
HVAEP1_T001079.1	NA	NA	NA	NA	NA	PTHR36970	UNNAMED PRODUCT	NA	NA	NA
HVAEP1_T001081.1	OG0001766	LSM1	ENSG00000175324	LSM1 homolog, mRNA degradation associated	NA	PTHR15588:SF8	U6 SNRNA-ASSOCIATED SM-LIKE PROTEIN LSM1	PF01423	LSM domain	LSM1_MOUSE;U6_snRNA-associated_Sm-like_protein_LSm1
HVAEP1_T001083.1	OG0000096	ERG, FLI1, FEV	ENSG00000157554, ENSG00000151702, ENSG00000163497	ETS transcription factor ERG, Fli-1 proto-oncogene, ETS transcription factor, FEV transcription factor, ETS family member	JQ994222.1; transcription factor Ets1	NA	NA	PF02198; PF00178	Sterile alpha motif (SAM)/Pointed domain; Ets-domain	ERG_CHICK;Transcriptional_regulator_Erg
HVAEP1_T001085.1	OG0002905	C2CD5	ENSG00000111731	C2 calcium dependent domain containing 5	NA	PTHR37412	C2 DOMAIN-CONTAINING PROTEIN 5	PF00168	C2 domain	C2CD5_HUMAN;C2_domain-containing_protein_5
HVAEP1_T001086.1	OG0000061	ABCC6, ABCC6, ABCC1, ABCC1, ABCC3, ABCC2	ENSG00000275331, ENSG00000091262, ENSG00000278183, ENSG00000103222, ENSG00000108846, ENSG00000023839	ATP binding cassette subfamily C member 6, ATP binding cassette subfamily C member 1, ATP binding cassette subfamily C member 2, ATP binding cassette subfamily C member 3	NA	PTHR24223:SF241	MULTIDRUG RESISTANCE-ASSOCIATED PROTEIN 1	PF00664; PF00005	ABC transporter transmembrane region; ABC transporter	MRP1_CHICK;Multidrug_resistance-associated_protein_1
HVAEP1_T001087.1	NA	NA	NA	NA	NA	PTHR46104:SF1	GENE 9195-RELATED	NA	NA	ZAN_MOUSE;Zonadhesin
HVAEP1_T001088.1	NA	NA	NA	NA	NA	NA	NA	NA	NA	POL_BAEVM;Gag-Pol_polyprotein
HVAEP1_T001092.1	OG0000574	KMT5A	ENSG00000183955	lysine methyltransferase 5A	NA	PTHR46167	N-LYSINE METHYLTRANSFERASE KMT5A	NA	NA	KT5AA_XENLA;N-lysine_methyltransferase_KMT5A-A
HVAEP1_T001093.1	OG0007229	PROSER3	ENSG00000167595	proline and serine rich 3	NA	PTHR22045	PROLINE AND SERINE-RICH PROTEIN 3	NA	NA	NA
HVAEP1_T001094.1	OG0000061	ABCC6, ABCC6, ABCC1, ABCC1, ABCC3, ABCC2	ENSG00000275331, ENSG00000091262, ENSG00000278183, ENSG00000103222, ENSG00000108846, ENSG00000023839	ATP binding cassette subfamily C member 6, ATP binding cassette subfamily C member 1, ATP binding cassette subfamily C member 2, ATP binding cassette subfamily C member 3	NA	PTHR24223:SF241	MULTIDRUG RESISTANCE-ASSOCIATED PROTEIN 1	PF00005; PF00664	ABC transporter; ABC transporter transmembrane region	MRP1_CHICK;Multidrug_resistance-associated_protein_1
HVAEP1_T001098.1	OG0000061	ABCC6, ABCC6, ABCC1, ABCC1, ABCC3, ABCC2	ENSG00000275331, ENSG00000091262, ENSG00000278183, ENSG00000103222, ENSG00000108846, ENSG00000023839	ATP binding cassette subfamily C member 6, ATP binding cassette subfamily C member 1, ATP binding cassette subfamily C member 2, ATP binding cassette subfamily C member 3	NA	PTHR24223:SF176	CANALICULAR MULTISPECIFIC ORGANIC ANION TRANSPORTER 1	PF00005; PF00664	ABC transporter; ABC transporter transmembrane region	MRP2_RAT;ATP-binding_cassette_sub-family_C_member_2
HVAEP1_T001100.1	OG0000061	ABCC6, ABCC6, ABCC1, ABCC1, ABCC3, ABCC2	ENSG00000275331, ENSG00000091262, ENSG00000278183, ENSG00000103222, ENSG00000108846, ENSG00000023839	ATP binding cassette subfamily C member 6, ATP binding cassette subfamily C member 1, ATP binding cassette subfamily C member 2, ATP binding cassette subfamily C member 3	NA	PTHR24223:SF271	FI20146P1-RELATED	NA	NA	MRP2_RAT;ATP-binding_cassette_sub-family_C_member_2
HVAEP1_T001101.1	OG0000061	ABCC6, ABCC6, ABCC1, ABCC1, ABCC3, ABCC2	ENSG00000275331, ENSG00000091262, ENSG00000278183, ENSG00000103222, ENSG00000108846, ENSG00000023839	ATP binding cassette subfamily C member 6, ATP binding cassette subfamily C member 1, ATP binding cassette subfamily C member 2, ATP binding cassette subfamily C member 3	NA	PTHR24223:SF176	CANALICULAR MULTISPECIFIC ORGANIC ANION TRANSPORTER 1	PF00005; PF00664	ABC transporter; ABC transporter transmembrane region	MRP1_CHICK;Multidrug_resistance-associated_protein_1
HVAEP1_T001102.1	NA	NA	NA	NA	NA	PTHR45695:SF9	LEUCOKININ RECEPTOR-RELATED	PF00001	7 transmembrane receptor (rhodopsin family)	OPN4A_DANRE;Melanopsin-A
HVAEP1_T001105.1	OG0000093	LAMA3, LAMA5	ENSG00000053747, ENSG00000130702	laminin subunit alpha 3, laminin subunit alpha 5	NA	PTHR10574:SF261	LAMININ SUBUNIT ALPHA-5	PF00055; PF00054; PF00052; PF00053	Laminin N-terminal (Domain VI); Laminin G domain; Laminin B (Domain IV); Laminin EGF domain	LAMA_DROME;Laminin_subunit_alpha
HVAEP1_T001106.1	NA	NA	NA	NA	NA	NA	NA	PF00097	Zinc finger, C3HC4 type (RING finger)	RN122_HUMAN;RING_finger_protein_122
HVAEP1_T001109.1	NA	NA	NA	NA	NA	PTHR11046	OLIGORIBONUCLEASE, MITOCHONDRIAL	NA	NA	NA
HVAEP1_T001110.2	OG0000321	rpl22l1, txlna, tmprss11f, cpm, camlg, ncln, med9	ENSXETG00000035493, ENSXETG00000037891, ENSXETG00000040087, ENSXETG00000040612, ENSXETG00000038173, ENSXETG00000038007, ENSXETG00000035613		NA	NA	NA	NA	NA	YTX2_XENLA;Transposon_TX1_uncharacterized_149_kDa_protein
HVAEP1_T001111.1	NA	NA	NA	NA	NA	PTHR45969	RING ZINC FINGER PROTEIN-RELATED	PF13639	Ring finger domain	RN139_MOUSE;E3_ubiquitin-protein_ligase_RNF139
HVAEP1_T001112.1	NA	NA	NA	NA	NA	PTHR10334:SF386	GOLGI-ASSOCIATED PLANT PATHOGENESIS-RELATED PROTEIN 1	PF01549; PF00188	ShK domain-like; Cysteine-rich secretory protein family	ECT_ACRMI;Ectin_(Fragment)
HVAEP1_T001113.1	NA	NA	NA	NA	NA	NA	NA	PF13639	Ring finger domain	BBR_ARATH;E3_ubiquitin_ligase_BIG_BROTHER-related
HVAEP1_T001114.1	OG0000808	PRMT1, PRMT8	ENSG00000126457, ENSG00000111218	protein arginine methyltransferase 8, protein arginine methyltransferase 1	NA	PTHR11006:SF47	PROTEIN ARGININE N-METHYLTRANSFERASE 8	PF13649	Methyltransferase domain	ANM1_XENTR;Protein_arginine_N-methyltransferase_1
HVAEP1_T001115.1	OG0000432	KMT2B, KMT2A	ENSG00000272333, ENSG00000118058	lysine methyltransferase 2B, lysine methyltransferase 2A	NA	PTHR45838:SF3	HISTONE-LYSINE N-METHYLTRANSFERASE 2B	PF13771; PF05965; PF05964; PF00628; PF00856	PHD-like zinc-binding domain; F/Y rich C-terminus; F/Y-rich N-terminus; PHD-finger; SET domain	KMT2B_MOUSE;Histone-lysine_N-methyltransferase_2B
HVAEP1_T001117.1	NA	NA	NA	NA	DQ286045.1; heat shock protein 70 (hsp70)	PTHR19375:SF458	SI:CH211-199O1.2	PF00012	Hsp70 protein	HSP70_HYDVU;Heat_shock_70_kDa_protein
HVAEP1_T001119.1	NA	NA	NA	NA	NA	PTHR31356	THYLAKOID LUMENAL 29 KDA PROTEIN, CHLOROPLASTIC-RELATED	PF00141	Peroxidase	APX1_HYDVD;Putative_ascorbate_peroxidase
HVAEP1_T001120.1	OG0003072	VANGL2, VANGL1	ENSG00000162738, ENSG00000173218	VANGL planar cell polarity protein 1, VANGL planar cell polarity protein 2	AM263457.1; putative Strabismus/VanGogh protein (stbm gene), strain Basel	PTHR20886	VANG-LIKE PROTEIN	PF06638	Strabismus protein	VANG2_DANRE;Vang-like_protein_2
HVAEP1_T001121.3	NA	NA	NA	NA	NA	PTHR17550:SF4	E3 UBIQUITIN-PROTEIN LIGASE TTC3	PF19179; PF13639	Family of unknown function (DUF5861); Ring finger domain	TTC3_HUMAN;E3_ubiquitin-protein_ligase_TTC3
HVAEP1_T001122.1	OG0005890	TMEM147	ENSG00000105677	transmembrane protein 147	NA	PTHR12869:SF0	TRANSMEMBRANE PROTEIN 147	PF09767	Predicted membrane protein (DUF2053)	TM147_DANRE;Transmembrane_protein_147
HVAEP1_T001123.1	OG0000669	KPNA4, KPNA3	ENSG00000186432, ENSG00000102753	karyopherin subunit alpha 3, karyopherin subunit alpha 4	AF005264.1; importin alpha-3 subunit	PTHR23316:SF28	IMPORTIN SUBUNIT ALPHA	PF00514; PF01749; PF16186	Armadillo/beta-catenin-like repeat; Importin beta binding domain; Atypical Arm repeat	IMA4_MOUSE;Importin_subunit_alpha-4
HVAEP1_T001124.1	OG0001186	RAB41	ENSG00000147127	RAB41, member RAS oncogene family	NA	PTHR24073:SF343	RAS-RELATED PROTEIN RAB-6B	PF00071	Ras family	RAB6B_CAEEL;Ras-related_protein_Rab-6.2
HVAEP1_T001125.1	NA	NA	NA	NA	NA	NA	NA	PF05225; PF03184	helix-turn-helix, Psq domain; DDE superfamily endonuclease	CHEC_CHAGB;Chaetoglobosin_A_biosynthesis_cluster_protein_C
HVAEP1_T001127.1	NA	NA	NA	NA	NA	PTHR47767	ADHESION G PROTEIN-COUPLED RECEPTOR G7	PF00002; PF01825	7 transmembrane receptor (Secretin family); GPCR proteolysis site, GPS, motif	AGRG4_HUMAN;Adhesion_G-protein_coupled_receptor_G4
HVAEP1_T001130.1	OG0003427	MRE11	ENSG00000020922	MRE11 homolog, double strand break repair nuclease	NA	PTHR10139	DOUBLE-STRAND BREAK REPAIR PROTEIN MRE11	PF00149; PF04152	Calcineurin-like phosphoesterase; Mre11 DNA-binding presumed domain	MRE11_RAT;Double-strand_break_repair_protein_MRE11
HVAEP1_T001131.1	OG0003648	CAB39, CAB39L	ENSG00000135932, ENSG00000102547	calcium binding protein 39 like, calcium binding protein 39	NA	PTHR10182:SF11	CALCIUM-BINDING PROTEIN 39	PF08569	Mo25-like	MO25_DROME;Protein_Mo25
HVAEP1_T001132.1	NA	NA	NA	NA	NA	PTHR47977:SF37	EG:80H7.4 PROTEIN	PF00071	Ras family	RAB6_DICDI;Ras-related_protein_Rab-6
HVAEP1_T001134.1	OG0001647	NAA50	ENSG00000121579	N-alpha-acetyltransferase 50, NatE catalytic subunit	NA	PTHR42919:SF8	N-ALPHA-ACETYLTRANSFERASE 50	PF00583	Acetyltransferase (GNAT) family	NAA50_XENTR;N-alpha-acetyltransferase_50
HVAEP1_T001135.1	OG0003573	OVOL3, OVOL2, OVOL1	ENSG00000105261, ENSG00000125850, ENSG00000172818	ovo like zinc finger 2, ovo like zinc finger 3, ovo like transcriptional repressor 1	NA	PTHR10032:SF271	OVO-LIKE ZINC FINGER 1A-RELATED	PF00096	Zinc finger, C2H2 type	OVOL1_MOUSE;Putative_transcription_factor_Ovo-like_1
HVAEP1_T001136.1	NA	NA	NA	NA	KC503882.1; xeroderma pigmentosum group G	PTHR16171:SF7	DNA REPAIR PROTEIN COMPLEMENTING XP-G CELLS	PF00867; PF00752	XPG I-region; XPG N-terminal domain	ERCC5_HUMAN;DNA_excision_repair_protein_ERCC-5
HVAEP1_T001137.1	OG0005881	NIP7	ENSG00000132603	nucleolar pre-rRNA processing protein NIP7	NA	PTHR23415:SF4	60S RIBOSOME SUBUNIT BIOGENESIS PROTEIN NIP7 HOMOLOG	PF03657; PF17833	UPF0113 PUA domain; UPF0113 Pre-PUA domain	NIP7_TETNG;60S_ribosome_subunit_biogenesis_protein_NIP7_homolog
HVAEP1_T001142.1	NA	NA	NA	NA	NA	PTHR33053:SF18	AGAP000105-PA	NA	NA	NA
HVAEP1_T001144.1	NA	NA	NA	NA	NA	PTHR35374	CYCLIN-DEPENDENT KINASE 11A-LIKE	NA	NA	NA
HVAEP1_T001145.1	NA	NA	NA	NA	NA	PTHR36159	PROTEIN CBG23766	NA	NA	NA
HVAEP1_T001146.1	NA	NA	NA	NA	NA	NA	NA	PF04947; PF07498	Poxvirus Late Transcription Factor VLTF3 like; Rho termination factor, N-terminal domain	VF282_IIV6;Putative_transcription_factor_282R
HVAEP1_T001157.1	OG0006096	ATP5MGL, ATP5MG	ENSG00000249222, ENSG00000167283	ATP synthase membrane subunit g like, ATP synthase membrane subunit g	NA	PTHR12386	ATP SYNTHASE SUBUNIT	PF04718	Mitochondrial ATP synthase g subunit	ATP5L_HUMAN;ATP_synthase_subunit_g,_mitochondrial
HVAEP1_T001159.1	OG0003784	FBL, FBL, FBLL1	ENSG00000280548, ENSG00000105202, ENSG00000188573	fibrillarin, fibrillarin like 1	NA	PTHR10335:SF6	RRNA/TRNA 2'-O-METHYLTRANSFERASE FIBRILLARIN-LIKE PROTEIN 1	PF01269	Fibrillarin	FBRL_DROME;rRNA_2'-O-methyltransferase_fibrillarin
HVAEP1_T001160.1	OG0002052	MPDU1	ENSG00000129255	mannose-P-dolichol utilization defect 1	NA	PTHR12226:SF2	MANNOSE-P-DOLICHOL UTILIZATION DEFECT 1 PROTEIN	PF04193	PQ loop repeat	MPU1_MOUSE;Mannose-P-dolichol_utilization_defect_1_protein
HVAEP1_T001161.1	OG0006296	CCDC15	ENSG00000149548	coiled-coil domain containing 15	NA	PTHR14817	COILED-COIL DOMAIN-CONTAINING PROTEIN 15	NA	NA	CCD15_MOUSE;Coiled-coil_domain-containing_protein_15
HVAEP1_T001162.1	OG0003521	HS6ST3, HS6ST2, HS6ST1	ENSG00000185352, ENSG00000171004, ENSG00000136720	heparan sulfate 6-O-sulfotransferase 3, heparan sulfate 6-O-sulfotransferase 2, heparan sulfate 6-O-sulfotransferase 1	NA	PTHR12812:SF6	HEPARAN-SULFATE 6-O-SULFOTRANSFERASE 2	PF03567	Sulfotransferase family	H6ST2_CHICK;Heparan-sulfate_6-O-sulfotransferase_2
HVAEP1_T001163.1	NA	NA	NA	NA	JX118848.1; antimicrobial peptide hydramacin	NA	NA	PF14865	Macin	HYDMA_HYDVU;Hydramacin-1
HVAEP1_T001166.1	OG0001433	UXS1	ENSG00000115652	UDP-glucuronate decarboxylase 1	NA	PTHR43078:SF6	UDP-GLUCURONIC ACID DECARBOXYLASE 1	PF16363	GDP-mannose 4,6 dehydratase	UXS1_RAT;UDP-glucuronic_acid_decarboxylase_1
HVAEP1_T001167.1	NA	NA	NA	NA	NA	NA	NA	PF00001	7 transmembrane receptor (rhodopsin family)	CXCR2_MACMU;C-X-C_chemokine_receptor_type_2_(Fragment)
HVAEP1_T001169.1	OG0000877	PAK2, PAK3, PAK1	ENSG00000180370, ENSG00000077264, ENSG00000149269	p21 (RAC1) activated kinase 3, p21 (RAC1) activated kinase 1, p21 (RAC1) activated kinase 2	NA	PTHR48015:SF20	SERINE/THREONINE-PROTEIN KINASE PAK 1	PF00069; PF00786	Protein kinase domain; P21-Rho-binding domain	PAK3_RAT;Serine/threonine-protein_kinase_PAK_3
HVAEP1_T001171.1	NA	NA	NA	NA	NA	NA	NA	PF05699	hAT family C-terminal dimerisation region	ZMYM1_HUMAN;Zinc_finger_MYM-type_protein_1
HVAEP1_T001173.1	NA	NA	NA	NA	NA	NA	NA	NA	NA	RTBS_DROME;Probable_RNA-directed_DNA_polymerase_from_transposon_BS
HVAEP1_T001178.1	NA	NA	NA	NA	NA	NA	NA	PF05699	hAT family C-terminal dimerisation region	ZMYM1_HUMAN;Zinc_finger_MYM-type_protein_1
HVAEP1_T001180.1	NA	NA	NA	NA	NA	PTHR10773:SF12	DNA-DIRECTED RNA POLYMERASES I, II, AND III SUBUNIT RPABC2	NA	NA	NA
HVAEP1_T001185.1	NA	NA	NA	NA	NA	PTHR31025:SF17	SI:CH211-196P9.1	NA	NA	NA
HVAEP1_T001186.1	NA	NA	NA	NA	NA	NA	NA	PF05485	THAP domain	NA
HVAEP1_T001187.1	OG0004931	NICN1	ENSG00000145029	nicolin 1	NA	NA	NA	NA	NA	NA
HVAEP1_T001188.2	NA	NA	NA	NA	NA	PTHR10773:SF12	DNA-DIRECTED RNA POLYMERASES I, II, AND III SUBUNIT RPABC2	NA	NA	NA
HVAEP1_T001189.1	NA	NA	NA	NA	NA	PTHR11360:SF251	KARMOISIN, ISOFORM B	PF07690	Major Facilitator Superfamily	MOT10_DANRE;Monocarboxylate_transporter_10
HVAEP1_T001190.1	NA	NA	NA	NA	NA	NA	NA	PF03281	Mab-21 protein	NA
HVAEP1_T001191.1	OG0007070	ATP5PF	ENSG00000154723	ATP synthase peripheral stalk subunit F6	DQ286052.1; putative ATP synthase coupling factor-like, complete sequence	PTHR12441:SF10	ATP SYNTHASE-COUPLING FACTOR 6, MITOCHONDRIAL	PF05511	Mitochondrial ATP synthase coupling factor 6	ATP5J_DROME;ATP_synthase-coupling_factor_6,_mitochondrial
HVAEP1_T001193.1	OG0000033	CYP4V2	ENSG00000145476	cytochrome P450 family 4 subfamily V member 2	NA	PTHR24291:SF157	CYTOCHROME P450 4V2	PF00067	Cytochrome P450	CP4V2_MOUSE;Cytochrome_P450_4V2
HVAEP1_T001194.1	OG0006545	EMC6	ENSG00000127774	ER membrane protein complex subunit 6	NA	PTHR20994:SF0	ER MEMBRANE PROTEIN COMPLEX SUBUNIT 6	PF07019	Rab5-interacting protein (Rab5ip)	EMC6_BOVIN;ER_membrane_protein_complex_subunit_6
HVAEP1_T001196.1	OG0004905	RPS25, RPS25	ENSG00000280831, ENSG00000118181	ribosomal protein S25	NA	PTHR12850	40S RIBOSOMAL PROTEIN S25	PF03297	S25 ribosomal protein	RS25_DROME;40S_ribosomal_protein_S25
HVAEP1_T001197.1	NA	NA	NA	NA	Y15516.1; prdl-b protein, partial	NA	NA	PF00046	Homeodomain	ARX_HUMAN;Homeobox_protein_ARX
HVAEP1_T001198.2	NA	NA	NA	NA	NA	NA	NA	PF00836	Stathmin family	NA
HVAEP1_T001200.1	OG0000290	RSF1	ENSG00000048649	remodeling and spacing factor 1	NA	PTHR14296:SF3	REMODELING AND SPACING FACTOR 1	PF00628	PHD-finger	RSF1_HUMAN;Remodeling_and_spacing_factor_1
HVAEP1_T001201.1	NA	NA	NA	NA	NA	PTHR11920:SF488	GUANYLATE CYCLASE	PF01094; PF00069; PF00211	Receptor family ligand binding region; Protein kinase domain; Adenylate and Guanylate cyclase catalytic domain	GCY_STRPU;Speract_receptor
HVAEP1_T001202.1	OG0005139	MOSPD1, MOSPD3	ENSG00000101928, ENSG00000106330	motile sperm domain containing 1, motile sperm domain containing 3	NA	PTHR34441	MOTILE SPERM DOMAIN-CONTAINING PROTEIN 1	NA	NA	MSPD1_MOUSE;Motile_sperm_domain-containing_protein_1
HVAEP1_T001203.2	OG0001806	PLCXD2, PLCXD3	ENSG00000240891, ENSG00000182836	phosphatidylinositol specific phospholipase C X domain containing 3, phosphatidylinositol specific phospholipase C X domain containing 2	NA	PTHR13593:SF32	PI-PLC X DOMAIN-CONTAINING PROTEIN 2	NA	NA	PLCX2_MOUSE;PI-PLC_X_domain-containing_protein_2
HVAEP1_T001204.1	NA	NA	NA	NA	NA	PTHR16469:SF7	UBIQUITIN-ASSOCIATED AND SH3 DOMAIN-CONTAINING PROTEIN A	PF00300	Histidine phosphatase superfamily (branch 1)	UBS3A_DROME;Protein_UBASH3A_homolog
HVAEP1_T001205.3	OG0005520	PEX19	ENSG00000162735	peroxisomal biogenesis factor 19	NA	PTHR12774	PEROXISOMAL BIOGENESIS FACTOR 19	PF04614	Pex19 protein family	PEX19_HUMAN;Peroxisomal_biogenesis_factor_19
HVAEP1_T001206.1	OG0004874	TAF9, TAF9, TAF9B	ENSG00000276463, ENSG00000273841, ENSG00000187325	TATA-box binding protein associated factor 9, TATA-box binding protein associated factor 9b	NA	PTHR48068:SF4	TAF9 RNA POLYMERASE II, TATA BOX-BINDING PROTEIN (TBP)-ASSOCIATED FACTOR	PF02291	Transcription initiation factor IID, 31kD subunit	TAF9_MOUSE;Transcription_initiation_factor_TFIID_subunit_9
HVAEP1_T001207.1	OG0003107	PUDP	ENSG00000130021	pseudouridine 5'-phosphatase	NA	PTHR18901	2-DEOXYGLUCOSE-6-PHOSPHATE PHOSPHATASE 2	PF13419	Haloacid dehalogenase-like hydrolase	HDHD1_HUMAN;Pseudouridine-5'-phosphatase
HVAEP1_T001208.1	OG0004495	ARMH1	ENSG00000198520	armadillo like helical domain containing 1	NA	PTHR34258	ARMADILLO-LIKE HELICAL DOMAIN CONTAINING PROTEIN 1	PF17741	Family of unknown function (DUF5578)	ARMD1_BOVIN;Armadillo-like_helical_domain_containing_protein_1
HVAEP1_T001211.1	OG0006146	DAW1	ENSG00000123977	dynein assembly factor with WD repeats 1	NA	PTHR44156:SF1	DYNEIN ASSEMBLY FACTOR WITH WDR REPEAT DOMAINS 1	PF00400	WD domain, G-beta repeat	DAW1_XENTR;Dynein_assembly_factor_with_WDR_repeat_domains_1
HVAEP1_T001212.1	OG0001007	DDX3Y, DDX3X	ENSG00000067048, ENSG00000215301	DEAD-box helicase 3 Y-linked, DEAD-box helicase 3 X-linked	AB047381.1; CnPL10 for PL10-related protein CnPL10	PTHR47958:SF98	DEAD-BOX HELICASE 3 X-LINKED A	PF00271; PF00270	Helicase conserved C-terminal domain; DEAD/DEAH box helicase	DDX3X_HUMAN;ATP-dependent_RNA_helicase_DDX3X
HVAEP1_T001215.1	NA	NA	NA	NA	NA	NA	NA	PF00505	HMG (high mobility group) box	S17B1_XENLA;Transcription_factor_Sox-17-beta.1
HVAEP1_T001216.1	OG0000425	ARHGEF9, SPATA13, ARHGEF4	ENSG00000131089, ENSG00000182957, ENSG00000136002	spermatogenesis associated 13, Cdc42 guanine nucleotide exchange factor 9, Rho guanine nucleotide exchange factor 4	NA	PTHR45834	RHO GUANINE NUCLEOTIDE EXCHANGE FACTOR 9-RELATED	PF00621; PF14604	RhoGEF domain; Variant SH3 domain	ARHG9_HUMAN;Rho_guanine_nucleotide_exchange_factor_9
HVAEP1_T001217.1	NA	NA	NA	NA	NA	PTHR11232:SF35	LOW DENSITY LIPOPROTEIN RECEPTOR ADAPTER PROTEIN 1	PF14719	Phosphotyrosine interaction domain (PTB/PID)	ARHA_XENLA;Low_density_lipoprotein_receptor_adapter_protein_1-A
HVAEP1_T001218.1	NA	NA	NA	NA	NA	PTHR48021:SF1	FACILITATED TREHALOSE TRANSPORTER TRET1-1-RELATED	PF00083	Sugar (and other) transporter	GTR8_HUMAN;Solute_carrier_family_2,_facilitated_glucose_transporter_member_8
HVAEP1_T001219.1	NA	NA	NA	NA	NA	PTHR48021:SF1	FACILITATED TREHALOSE TRANSPORTER TRET1-1-RELATED	PF00083	Sugar (and other) transporter	GTR8_HUMAN;Solute_carrier_family_2,_facilitated_glucose_transporter_member_8
HVAEP1_T001220.1	NA	NA	NA	NA	NA	PTHR48021:SF1	FACILITATED TREHALOSE TRANSPORTER TRET1-1-RELATED	PF00083	Sugar (and other) transporter	GTR8_HUMAN;Solute_carrier_family_2,_facilitated_glucose_transporter_member_8
HVAEP1_T001221.1	NA	NA	NA	NA	NA	NA	NA	PF00083	Sugar (and other) transporter	NA
HVAEP1_T001223.1	OG0000868	CG4612	FBgn0035016	NA	NA	PTHR24012:SF760	POLYADENYLATE-BINDING PROTEIN 1-RELATED	PF00076	RNA recognition motif. (a.k.a. RRM, RBD, or RNP domain)	PABP8_ARATH;Polyadenylate-binding_protein_8
HVAEP1_T001224.1	OG0000868	CG4612	FBgn0035016	NA	NA	PTHR24012:SF455	POLYADENYLATE-BINDING PROTEIN 7	PF00076	RNA recognition motif. (a.k.a. RRM, RBD, or RNP domain)	PABP4_HUMAN;Polyadenylate-binding_protein_4
HVAEP1_T001225.1	OG0000868	CG4612	FBgn0035016	NA	NA	PTHR24012:SF455	POLYADENYLATE-BINDING PROTEIN 7	PF00076	RNA recognition motif. (a.k.a. RRM, RBD, or RNP domain)	PABP8_ARATH;Polyadenylate-binding_protein_8
HVAEP1_T001228.1	NA	NA	NA	NA	NA	PTHR45749:SF9	AC-LIKE TRANSPOSASE	PF05699	hAT family C-terminal dimerisation region	NA
HVAEP1_T001229.1	OG0000007	ZMYM1	ENSG00000197056	zinc finger MYM-type containing 1	NA	PTHR45749:SF11	AC-LIKE TRANSPOSASE-RELATED	NA	NA	NA
HVAEP1_T001231.1	OG0000868	CG4612	FBgn0035016	NA	NA	PTHR24012:SF760	POLYADENYLATE-BINDING PROTEIN 1-RELATED	PF00076; PF13920	RNA recognition motif. (a.k.a. RRM, RBD, or RNP domain); Zinc finger, C3HC4 type (RING finger)	PABP8_ARATH;Polyadenylate-binding_protein_8
HVAEP1_T001233.1	OG0000868	CG4612	FBgn0035016	NA	NA	NA	NA	PF00076; PF13920	RNA recognition motif. (a.k.a. RRM, RBD, or RNP domain); Zinc finger, C3HC4 type (RING finger)	PABP2_ARATH;Polyadenylate-binding_protein_2
HVAEP1_T001239.1	NA	NA	NA	NA	NA	PTHR11046	OLIGORIBONUCLEASE, MITOCHONDRIAL	NA	NA	NA
HVAEP1_T001243.1	NA	NA	NA	NA	NA	PTHR10024:SF344	SYNAPTOTAGMIN-7	PF00168	C2 domain	SYT4_HUMAN;Synaptotagmin-4
HVAEP1_T001246.1	NA	NA	NA	NA	NA	NA	NA	PF01335	Death effector domain	NA
HVAEP1_T001247.1	OG0002820	TFDP2, TFDP1, TFDP3	ENSG00000114126, ENSG00000198176, ENSG00000183434	transcription factor Dp-1, transcription factor Dp family member 3, transcription factor Dp-2	NA	PTHR12548:SF5	TRANSCRIPTION FACTOR DP-2	PF02319; PF08781	E2F/DP family winged-helix DNA-binding domain; Transcription factor DP	TFDP1_BOVIN;Transcription_factor_Dp-1
HVAEP1_T001251.1	NA	NA	NA	NA	NA	PTHR24249:SF372	LP14436P	PF00001	7 transmembrane receptor (rhodopsin family)	CNR1A_TAKRU;Cannabinoid_receptor_type_1A
HVAEP1_T001252.1	NA	NA	NA	NA	NA	PTHR24416:SF359	HYPOXIA INHIBITED RECEPTOR TYROSINE KINASE	PF07714	Protein tyrosine and serine/threonine kinase	RET_RAT;Proto-oncogene_tyrosine-protein_kinase_receptor_Ret
HVAEP1_T001258.1	NA	NA	NA	NA	NA	PTHR24249:SF372	LP14436P	PF00001	7 transmembrane receptor (rhodopsin family)	CNR1_XENLA;Cannabinoid_receptor_1
HVAEP1_T001261.1	OG0001880	XRCC1	ENSG00000073050	X-ray repair cross complementing 1	NA	PTHR11370	DNA-REPAIR PROTEIN XRCC1	PF12738; PF01834	twin BRCT domain; XRCC1 N terminal domain	XRCC1_HUMAN;DNA_repair_protein_XRCC1
HVAEP1_T001262.1	OG0003571	TOMM40, TOMM40L	ENSG00000130204, ENSG00000158882	translocase of outer mitochondrial membrane 40, translocase of outer mitochondrial membrane 40 like	NA	PTHR10802	MITOCHONDRIAL IMPORT RECEPTOR SUBUNIT TOM40	PF01459	Eukaryotic porin	TOM40_XENTR;Mitochondrial_import_receptor_subunit_TOM40_homolog
HVAEP1_T001263.2	OG0001566	SUCLA2	ENSG00000136143	succinate-CoA ligase ADP-forming subunit beta	NA	PTHR11815:SF10	SUCCINATE--COA LIGASE [ADP-FORMING] SUBUNIT BETA, MITOCHONDRIAL	PF08442; PF00549	ATP-grasp domain; CoA-ligase	SUCB1_COLLI;Succinate--CoA_ligase_[ADP-forming]_subunit_beta,_mitochondrial_(Fragment)
HVAEP1_T001265.1	NA	NA	NA	NA	NA	NA	NA	PF07679	Immunoglobulin I-set domain	TITIN_HUMAN;Titin
HVAEP1_T001266.1	OG0005141	KHK	ENSG00000138030	ketohexokinase	NA	PTHR43085:SF1	KETOHEXOKINASE	PF00294	pfkB family carbohydrate kinase	KHK_MOUSE;Ketohexokinase
HVAEP1_T001267.1	OG0001807	UGGT1, UGGT2	ENSG00000136731, ENSG00000102595	UDP-glucose glycoprotein glucosyltransferase 2, UDP-glucose glycoprotein glucosyltransferase 1	NA	PTHR11226	UDP-GLUCOSE GLYCOPROTEIN:GLUCOSYLTRANSFERASE	PF06427; PF18403; PF18404	UDP-glucose:Glycoprotein Glucosyltransferase; Thioredoxin-like domain; Glucosyltransferase 24	UGGG1_MOUSE;UDP-glucose:glycoprotein_glucosyltransferase_1
HVAEP1_T001268.1	NA	NA	NA	NA	NA	NA	NA	PF13384	Homeodomain-like domain	NA
HVAEP1_T001269.1	OG0000010	T19C9.10	WBGene00050934	ATP-dependent DNA helicase	NA	NA	NA	NA	NA	NA
HVAEP1_T001271.2	NA	NA	NA	NA	NA	PTHR11046	OLIGORIBONUCLEASE, MITOCHONDRIAL	NA	NA	NA
HVAEP1_T001274.1	OG0000027	CG32187	FBgn0052187	NA	NA	NA	NA	NA	NA	NA
HVAEP1_T001278.1	NA	NA	NA	NA	NA	NA	NA	PF12560	RAG1 importin binding	RAG1_PIG;V(D)J_recombination-activating_protein_1
HVAEP1_T001280.1	OG0000997	LAMP3, CD68	ENSG00000078081, ENSG00000129226	CD68 molecule, lysosomal associated membrane protein 3	NA	PTHR11506:SF28	FI04419P	NA	NA	LAMP1_CHICK;Lysosome-associated_membrane_glycoprotein_1
HVAEP1_T001283.1	OG0000997	LAMP3, CD68	ENSG00000078081, ENSG00000129226	CD68 molecule, lysosomal associated membrane protein 3	NA	NA	NA	NA	NA	LAMP1_CRIGR;Lysosome-associated_membrane_glycoprotein_1
HVAEP1_T001285.1	OG0001076	ARL14EP	ENSG00000152219	ADP ribosylation factor like GTPase 14 effector protein	NA	NA	NA	NA	NA	NA
HVAEP1_T001286.1	OG0004629	MIPEP	ENSG00000027001	mitochondrial intermediate peptidase	NA	PTHR11804:SF5	MITOCHONDRIAL INTERMEDIATE PEPTIDASE	PF01432	Peptidase family M3	MIPEP_PONAB;Mitochondrial_intermediate_peptidase
HVAEP1_T001287.1	OG0005242	VPS26C	ENSG00000157538	VPS26 endosomal protein sorting factor C	NA	PTHR12233:SF2	VACUOLAR PROTEIN SORTING-ASSOCIATED PROTEIN 26C	PF03643	Vacuolar protein sorting-associated protein 26	VP26C_HUMAN;Vacuolar_protein_sorting-associated_protein_26C
HVAEP1_T001288.1	OG0004408	FUNDC2, FUNDC1	ENSG00000165775, ENSG00000069509	FUN14 domain containing 1, FUN14 domain containing 2	NA	PTHR21346	FUN14 DOMAIN CONTAINING	PF04930	FUN14 family	FUND1_DANRE;FUN14_domain-containing_protein_1
HVAEP1_T001289.1	OG0000093	HSPG2	ENSG00000142798	heparan sulfate proteoglycan 2	LN868238.1; Hemicentin 1-like 2 (HMCN1L2 gene), strain Jussy	PTHR11640:SF79	HEPARAN SULFATE PROTEOGLYCAN 2	PF00052; PF13385; PF13927; PF00054; PF00053; PF00008; PF07679	Laminin B (Domain IV); Concanavalin A-like lectin/glucanases superfamily; Immunoglobulin domain; Laminin G domain; Laminin EGF domain; EGF-like domain; Immunoglobulin I-set domain	PGBM_MOUSE;Basement_membrane-specific_heparan_sulfate_proteoglycan_core_protein
HVAEP1_T001290.1	OG0000681	BCL10	ENSG00000142867	BCL10 immune signaling adaptor	NA	NA	NA	PF00619	Caspase recruitment domain	VCLAP_EHV2;CARD_domain-containing_protein_E10
HVAEP1_T001291.1	OG0005286	PPP1R2C, PPP1R2B, PPP1R2	ENSG00000102055, ENSG00000231989, ENSG00000184203	PPP1R2C family member C, PPP1R2 family member B, protein phosphatase 1 regulatory inhibitor subunit 2	NA	PTHR12398:SF22	PROTEIN PHOSPHATASE INHIBITOR 2-RELATED	PF04979	Protein phosphatase inhibitor 2 (IPP-2)	IPP2_RABIT;Protein_phosphatase_inhibitor_2
HVAEP1_T001292.1	OG0005205	RPL35A	ENSG00000182899	ribosomal protein L35a	DQ286046.1; ribosomal protein L35A	PTHR10902	60S RIBOSOMAL PROTEIN L35A	PF01247	Ribosomal protein L35Ae	RL35A_ICTPU;60S_ribosomal_protein_L35a
HVAEP1_T001295.2	OG0001187	GCC2	ENSG00000135968	GRIP and coiled-coil domain containing 2	NA	PTHR18902:SF30	FI04457P	PF16704; PF01465	Rab binding domain; GRIP domain	GCC2_RAT;GRIP_and_coiled-coil_domain-containing_protein_2
HVAEP1_T001296.1	OG0001822	FUT11	ENSG00000196968	fucosyltransferase 11	NA	PTHR11929:SF131	ALPHA-(1,3)-FUCOSYLTRANSFERASE 10	PF00852; PF17039	Glycosyltransferase family 10 (fucosyltransferase) C-term; Fucosyltransferase, N-terminal	FUT11_DANRE;Alpha-(1,3)-fucosyltransferase_11
HVAEP1_T001297.5	NA	NA	NA	NA	NA	PTHR22906:SF21	COMPLEMENT FACTOR PROPERDIN-RELATED	PF01607; PF00090	Chitin binding Peritrophin-A domain; Thrombospondin type 1 domain	CADN_ACRMI;Coadhesin_(Fragment)
HVAEP1_T001298.1	OG0001822	FUT11	ENSG00000196968	fucosyltransferase 11	NA	PTHR11929:SF131	ALPHA-(1,3)-FUCOSYLTRANSFERASE 10	PF17039; PF00852	Fucosyltransferase, N-terminal; Glycosyltransferase family 10 (fucosyltransferase) C-term	FUT11_ORYLA;Alpha-(1,3)-fucosyltransferase_11
HVAEP1_T001299.1	OG0000006	RYK	ENSG00000163785	receptor like tyrosine kinase	HM117257.1; strain Ind-Pune receptor-like tyrosine kinase (RyK)	PTHR24416:SF349	TYROSINE-PROTEIN KINASE RYK	PF07714; PF02019	Protein tyrosine and serine/threonine kinase; WIF domain	RYK_MOUSE;Tyrosine-protein_kinase_RYK
HVAEP1_T001300.1	NA	NA	NA	NA	NA	PTHR24070:SF69	FI18258P1	PF00071	Ras family	DIRA2_HUMAN;GTP-binding_protein_Di-Ras2
HVAEP1_T001301.1	NA	NA	NA	NA	NA	PTHR24070:SF290	EG:BACR37P7.8 PROTEIN	PF00071	Ras family	DIRA_CAEEL;GTP-binding_protein_drn-1_(Fragment)
HVAEP1_T001303.1	NA	NA	NA	NA	NA	PTHR24070:SF290	EG:BACR37P7.8 PROTEIN	PF00071	Ras family	DIRA_CAEEL;GTP-binding_protein_drn-1_(Fragment)
HVAEP1_T001304.2	OG0000006	Shark	FBgn0015295	NA	U00936.1; protein-tyrosine kinase gene	PTHR24418:SF372	TYROSINE-PROTEIN KINASE SHARK	PF00017; PF13637; PF07714; PF12796	SH2 domain; Ankyrin repeats (many copies); Protein tyrosine and serine/threonine kinase; Ankyrin repeats (3 copies)	HTK16_HYDVU;Tyrosine-protein_kinase_HTK16
HVAEP1_T001306.1	OG0004839	NFU1	ENSG00000169599	NFU1 iron-sulfur cluster scaffold	NA	PTHR11178:SF46	NFU1 IRON-SULFUR CLUSTER SCAFFOLD HOMOLOG (S. CEREVISIAE)	PF08712; PF01106	Scaffold protein Nfu/NifU N terminal; NifU-like domain	NFU1_HUMAN;NFU1_iron-sulfur_cluster_scaffold_homolog,_mitochondrial
HVAEP1_T001307.1	NA	NA	NA	NA	NA	NA	NA	PF00001	7 transmembrane receptor (rhodopsin family)	OPSC2_HEMSA;Compound_eye_opsin_BCRH2
HVAEP1_T001308.2	NA	NA	NA	NA	NA	PTHR23430:SF72	HISTONE H2A TYPE 2-B	PF00125; PF16211	Core histone H2A/H2B/H3/H4; C-terminus of histone H2A	H2A_DROER;Histone_H2A
HVAEP1_T001309.1	NA	NA	NA	NA	NA	PTHR45695:SF9	LEUCOKININ RECEPTOR-RELATED	PF00001	7 transmembrane receptor (rhodopsin family)	OPSC1_HEMSA;Compound_eye_opsin_BCRH1
HVAEP1_T001310.1	OG0003175	PSMD1	ENSG00000173692	proteasome 26S subunit, non-ATPase 1	NA	PTHR10943:SF2	26S PROTEASOME NON-ATPASE REGULATORY SUBUNIT 1	PF18004; PF13646; PF01851	26S proteasome regulatory subunit RPN2 C-terminal domain; HEAT repeats; Proteasome/cyclosome repeat	PSMD1_CHICK;26S_proteasome_non-ATPase_regulatory_subunit_1
HVAEP1_T001311.1	OG0000602	FTH1, FTHL17, FTMT, FTL	ENSG00000167996, ENSG00000132446, ENSG00000181867, ENSG00000087086	ferritin heavy chain like 17, ferritin mitochondrial, ferritin light chain, ferritin heavy chain 1	NA	NA	NA	PF00210	Ferritin-like domain	FRIS_LYMST;Soma_ferritin
HVAEP1_T001312.1	NA	NA	NA	NA	NA	PTHR24034:SF107	FIBULIN-5	PF07645	Calcium-binding EGF domain	CREL1_MOUSE;Protein_disulfide_isomerase_Creld1
HVAEP1_T001313.1	NA	NA	NA	NA	NA	NA	NA	PF07645	Calcium-binding EGF domain	NA
HVAEP1_T001314.1	NA	NA	NA	NA	NA	PTHR24039:SF28	FIBRILLIN 2B	PF07645	Calcium-binding EGF domain	NA
HVAEP1_T001315.1	NA	NA	NA	NA	NA	PTHR24039:SF28	FIBRILLIN 2B	PF07645	Calcium-binding EGF domain	NA
HVAEP1_T001316.1	NA	NA	NA	NA	NA	NA	NA	PF07645	Calcium-binding EGF domain	NA
HVAEP1_T001319.1	NA	NA	NA	NA	NA	NA	NA	PF07645	Calcium-binding EGF domain	AGRE1_RAT;Adhesion_G_protein-coupled_receptor_E2
HVAEP1_T001326.1	NA	NA	NA	NA	LN868233.1; Contactin-associated protein 4 (CNTNAP4 gene), strain Jussy	PTHR15036:SF46	CONTACTIN-ASSOCIATED PROTEIN-LIKE 5	PF02210	Laminin G domain	NR1AA_DANRE;Neurexin-1a
HVAEP1_T001327.1	OG0000228	XB5731323	ENSXETG00000013257	uncharacterized XB5731323	NA	NA	NA	PF00248	Aldo/keto reductase family	DKGA_ECO57;2,5-diketo-D-gluconic_acid_reductase_A
HVAEP1_T001328.1	OG0000542	DGAT2L6, AWAT2, AWAT1, MOGAT3, DGAT2, MOGAT2, MOGAT1	ENSG00000184210, ENSG00000147160, ENSG00000204195, ENSG00000106384, ENSG00000062282, ENSG00000166391, ENSG00000124003	acyl-CoA wax alcohol acyltransferase 2, diacylglycerol O-acyltransferase 2 like 6, acyl-CoA wax alcohol acyltransferase 1, monoacylglycerol O-acyltransferase 3, diacylglycerol O-acyltransferase 2, monoacylglycerol O-acyltransferase 1, monoacylglycerol O-acyltransferase 2	NA	PTHR12317:SF0	DIACYLGLYCEROL O-ACYLTRANSFERASE 1	PF03982	Diacylglycerol acyltransferase	MOGT1_BOVIN;2-acylglycerol_O-acyltransferase_1
HVAEP1_T001330.1	NA	NA	NA	NA	NA	PTHR24559:SF375	RETROVIRUS-RELATED POL POLYPROTEIN FROM TRANSPOSON GYPSY-LIKE PROTEIN	NA	NA	GIN1_PONAB;Gypsy_retrotransposon_integrase-like_protein_1
HVAEP1_T001331.1	NA	NA	NA	NA	NA	NA	NA	PF17921	Integrase zinc binding domain	GIN1_BOVIN;Gypsy_retrotransposon_integrase-like_protein_1
HVAEP1_T001332.1	NA	NA	NA	NA	NA	PTHR46169:SF14	SIN3-HDAC COMPLEX-ASSOCIATED FACTOR,-LIKE-RELATED	PF02892	BED zinc finger	TRA1_MAIZE;Putative_AC_transposase
HVAEP1_T001333.1	OG0001246	CG31224	FBgn0051224	NA	NA	NA	NA	PF00096	Zinc finger, C2H2 type	NA
HVAEP1_T001334.1	OG0001246	CG31224	FBgn0051224	NA	NA	NA	NA	NA	NA	NA
HVAEP1_T001335.1	OG0001246	CG31224	FBgn0051224	NA	NA	PTHR24390:SF159	GH23506P-RELATED	PF00096; PF00385; PF13894	Zinc finger, C2H2 type; Chromo (CHRromatin Organisation MOdifier) domain; C2H2-type zinc finger	ZFY2_MOUSE;Zinc_finger_Y-chromosomal_protein_2
HVAEP1_T001336.2	NA	NA	NA	NA	NA	NA	NA	PF07679	Immunoglobulin I-set domain	HMCN1_HUMAN;Hemicentin-1
HVAEP1_T001338.1	OG0005645	TEX47	ENSG00000164645	testis expressed 47	NA	PTHR34035	TESTIS-EXPRESSED PROTEIN 47	NA	NA	TEX47_MOUSE;Testis-expressed_protein_47
HVAEP1_T001339.1	OG0005566	SPRYD7	ENSG00000123178	SPRY domain containing 7	NA	PTHR20951	C13ORF1 PROTEIN-RELATED	PF00622	SPRY domain	SPRY7_CHICK;SPRY_domain-containing_protein_7
HVAEP1_T001340.1	OG0000363	VAT1	ENSG00000108828	vesicle amine transport 1	NA	PTHR48106:SF13	QUINONE OXIDOREDUCTASE-RELATED	PF00107	Zinc-binding dehydrogenase	CAA43_BURSP;2-haloacrylate_reductase
HVAEP1_T001341.2	OG0001092	IFT80	ENSG00000068885	intraflagellar transport 80	NA	PTHR24098:SF11	INTRAFLAGELLAR TRANSPORT PROTEIN 80 HOMOLOG	PF00400	WD domain, G-beta repeat	IFT80_RAT;Intraflagellar_transport_protein_80_homolog
HVAEP1_T001342.1	OG0000702	PRKX	ENSG00000183943	protein kinase X-linked	NA	PTHR24353:SF117	UT01108P-RELATED	PF00069	Protein kinase domain	PRKX_HUMAN;cAMP-dependent_protein_kinase_catalytic_subunit_PRKX
HVAEP1_T001343.1	NA	NA	NA	NA	NA	NA	NA	PF03184	DDE superfamily endonuclease	CLZ9_COCLU;MFS-type_transporter_clz9
HVAEP1_T001344.1	NA	NA	NA	NA	NA	PTHR24070:SF69	FI18258P1	PF00071	Ras family	DIRA1_HUMAN;GTP-binding_protein_Di-Ras1
HVAEP1_T001345.1	OG0000364	T05B9.2	WBGene00011465	hypothetical protein	NA	NA	NA	PF00024	PAN domain	NA
HVAEP1_T001346.1	OG0000364	T05B9.2	WBGene00011465	hypothetical protein	NA	NA	NA	PF00024	PAN domain	NA
HVAEP1_T001348.1	NA	NA	NA	NA	NA	NA	NA	PF00088	Trefoil (P-type) domain	NA
HVAEP1_T001349.1	NA	NA	NA	NA	NA	NA	NA	PF00582	Universal stress protein family	Y1101_SYNY3;Universal_stress_protein_Slr1101
HVAEP1_T001350.2	NA	NA	NA	NA	NA	PTHR19972	CALBINDIN	PF13202	EF hand	CALB2_MOUSE;Calretinin
HVAEP1_T001351.1	OG0006175	CLNS1A	ENSG00000074201	chloride nucleotide-sensitive channel 1A	NA	PTHR21399:SF0	METHYLOSOME SUBUNIT PICLN	PF03517	Regulator of volume decrease after cellular swelling	ICLN_RABIT;Methylosome_subunit_pICln
HVAEP1_T001354.1	OG0004236	PDE12	ENSG00000174840	phosphodiesterase 12	NA	PTHR12121:SF37	2',5'-PHOSPHODIESTERASE 12	PF03372	Endonuclease/Exonuclease/phosphatase family	PDE12_MOUSE;2',5'-phosphodiesterase_12
HVAEP1_T001355.1	OG0002654	DZIP1, DZIP1L	ENSG00000134874, ENSG00000158163	DAZ interacting zinc finger protein 1, DAZ interacting zinc finger protein 1 like	NA	NA	NA	PF13815	Iguana/Dzip1-like DAZ-interacting protein N-terminal	DZIP1_MOUSE;Zinc_finger_protein_DZIP1
HVAEP1_T001356.1	NA	NA	NA	NA	NA	NA	NA	PF00023; PF13857; PF12796	Ankyrin repeat; Ankyrin repeats (many copies); Ankyrin repeats (3 copies)	NA
HVAEP1_T001357.1	NA	NA	NA	NA	NA	PTHR10270:SF305	SOX21A, ISOFORM B-RELATED	PF00505	HMG (high mobility group) box	SOX3_CAEEL;Transcription_factor_sox-3
HVAEP1_T001358.1	NA	NA	NA	NA	NA	PTHR24180:SF15	CYCLIN-DEPENDENT KINASE INHIBITOR 2C	PF12796; PF13637	Ankyrin repeats (3 copies); Ankyrin repeats (many copies)	NA
HVAEP1_T001359.1	OG0002101	MPPED2, MPPED1	ENSG00000066382, ENSG00000186732	metallophosphoesterase domain containing 1, metallophosphoesterase domain containing 2	NA	PTHR12905:SF13	METALLOPHOSPHOESTERASE MPPED2	PF00149	Calcineurin-like phosphoesterase	MPPD1_HUMAN;Metallophosphoesterase_domain-containing_protein_1
HVAEP1_T001362.1	OG0003090	DYRK1A, DYRK1B, DYRK1B	ENSG00000157540, ENSG00000281320, ENSG00000105204	dual specificity tyrosine phosphorylation regulated kinase 1B, dual specificity tyrosine phosphorylation regulated kinase 1A	NA	PTHR24058:SF121	DUAL SPECIFICITY TYROSINE-PHOSPHORYLATION-REGULATED KINASE 1A	PF00069	Protein kinase domain	DYR1A_MOUSE;Dual_specificity_tyrosine-phosphorylation-regulated_kinase_1A
HVAEP1_T001363.1	NA	NA	NA	NA	NA	PTHR22804:SF52	NEUROGENIC LOCUS NOTCH HOMOLOG PROTEIN 2	PF12661; PF00008	Human growth factor-like EGF; EGF-like domain	EYS_DANRE;Protein_eyes_shut_homolog
HVAEP1_T001364.1	OG0000129	MYO5B, MYO5A, MYO5C	ENSG00000167306, ENSG00000197535, ENSG00000128833	myosin VC, myosin VB, myosin VA	NA	PTHR13140:SF273	UNCONVENTIONAL MYOSIN-VA	PF01843; PF00612; PF00063	DIL domain; IQ calmodulin-binding motif; Myosin head (motor domain)	MYO5A_MOUSE;Unconventional_myosin-Va
HVAEP1_T001365.1	OG0000081	SIK3	ENSG00000160584	SIK family kinase 3	NA	PTHR24346:SF42	SERINE/THREONINE-PROTEIN KINASE SIK3	PF02149; PF00069	Kinase associated domain 1; Protein kinase domain	SIK3_MOUSE;Serine/threonine-protein_kinase_SIK3
HVAEP1_T001367.1	OG0006005	ETFB	ENSG00000105379	electron transfer flavoprotein subunit beta	AY030357.1; electron transfer flavoprotein beta subunit	PTHR21294:SF8	ELECTRON TRANSFER FLAVOPROTEIN SUBUNIT BETA	PF01012	Electron transfer flavoprotein domain	ETFB_HUMAN;Electron_transfer_flavoprotein_subunit_beta
HVAEP1_T001369.1	OG0001198	CUL3	ENSG00000036257	cullin 3	NA	PTHR11932:SF95	CULLIN-3A-RELATED	PF10557; PF00888	Cullin protein neddylation domain; Cullin family	CUL3_MOUSE;Cullin-3
HVAEP1_T001370.1	NA	NA	NA	NA	NA	NA	NA	PF05225	helix-turn-helix, Psq domain	NA
HVAEP1_T001371.1	OG0005524	GTF2F2	ENSG00000188342	general transcription factor IIF subunit 2	NA	PTHR10445:SF0	GENERAL TRANSCRIPTION FACTOR IIF SUBUNIT 2	PF02270; PF17683	TFIIF, beta subunit HTH domain; TFIIF, beta subunit N-terminus	T2FB_XENLA;General_transcription_factor_IIF_subunit_2
HVAEP1_T001372.3	OG0003251	IGSF9, IGSF9B	ENSG00000085552, ENSG00000080854	immunoglobulin superfamily member 9B, immunoglobulin superfamily member 9	NA	NA	NA	PF13927; PF07686; PF07679	Immunoglobulin domain; Immunoglobulin V-set domain; Immunoglobulin I-set domain	TUTL_DROME;Protein_turtle
HVAEP1_T001373.1	NA	NA	NA	NA	NA	PTHR47326	TRANSPOSABLE ELEMENT TC3 TRANSPOSASE-LIKE PROTEIN	NA	NA	NA
HVAEP1_T001374.1	OG0000991	GRAMD1C, GRAMD1B, GRAMD1A	ENSG00000178075, ENSG00000023171, ENSG00000089351	GRAM domain containing 1A, GRAM domain containing 1B, GRAM domain containing 1C	NA	PTHR23319:SF4	AT22714P	PF02893; PF16016	GRAM domain; VAD1 Analog of StAR-related lipid transfer domain	ASTRB_HUMAN;Protein_Aster-B
HVAEP1_T001375.1	NA	NA	NA	NA	NA	PTHR10514	ANGIOTENSIN-CONVERTING ENZYME	PF01401	Angiotensin-converting enzyme	ACE_RAT;Angiotensin-converting_enzyme
HVAEP1_T001376.1	NA	NA	NA	NA	NA	NA	NA	PF13637; PF13606; PF00536; PF00013; PF12796	Ankyrin repeats (many copies); Ankyrin repeat; SAM domain (Sterile alpha motif); KH domain; Ankyrin repeats (3 copies)	ANKHM_CAEEL;Ankyrin_repeat_and_KH_domain-containing_protein_mask-1
HVAEP1_T001378.1	NA	NA	NA	NA	MK376927.1; innexin 11 (INX11)	PTHR11893	INNEXIN	PF00876	Innexin	NA
HVAEP1_T001380.1	OG0000070	CALML4	ENSG00000129007	calmodulin like 4	NA	PTHR23048:SF0	FI08416P-RELATED	PF00036; PF13499	EF hand; EF-hand domain pair	CALMS_CHICK;Calmodulin,_striated_muscle
HVAEP1_T001381.1	NA	NA	NA	NA	NA	NA	NA	PF00001	7 transmembrane receptor (rhodopsin family)	OPSP_ICTPU;Parapinopsin
HVAEP1_T001382.3	OG0000385	L3MBTL3, L3MBTL4, L3MBTL1	ENSG00000198945, ENSG00000154655, ENSG00000185513	L3MBTL histone methyl-lysine binding protein 4, L3MBTL histone methyl-lysine binding protein 1, L3MBTL histone methyl-lysine binding protein 3	NA	PTHR12247:SF130	L3MBTL HISTONE METHYL-LYSINE-BINDING PROTEIN 1B	PF00536; PF02820; PF01530	SAM domain (Sterile alpha motif); mbt repeat; Zinc finger, C2HC type	LMBL3_HUMAN;Lethal(3)malignant_brain_tumor-like_protein_3
HVAEP1_T001383.1	NA	NA	NA	NA	NA	PTHR16165	BRUSH BORDER-RELATED	NA	NA	NA
HVAEP1_T001384.1	OG0001487	MDH1B	ENSG00000138400	malate dehydrogenase 1B	NA	PTHR23382:SF1	MALATE DEHYDROGENASE 1B-RELATED	NA	NA	MDH1B_BRAFL;Putative_malate_dehydrogenase_1B
HVAEP1_T001385.1	OG0000096	edl	FBgn0023214	NA	NA	NA	NA	PF02198	Sterile alpha motif (SAM)/Pointed domain	ETV6_MOUSE;Transcription_factor_ETV6
HVAEP1_T001387.1	OG0000792	TOMM70	ENSG00000154174	translocase of outer mitochondrial membrane 70	NA	PTHR46208	MITOCHONDRIAL IMPORT RECEPTOR SUBUNIT TOM70	PF00515	Tetratricopeptide repeat	TOM70_HUMAN;Mitochondrial_import_receptor_subunit_TOM70
HVAEP1_T001388.3	NA	NA	NA	NA	NA	NA	NA	PF00001	7 transmembrane receptor (rhodopsin family)	SSR2_BOVIN;Somatostatin_receptor_type_2
HVAEP1_T001389.1	NA	NA	NA	NA	NA	NA	NA	PF00001	7 transmembrane receptor (rhodopsin family)	TLR1_DROME;Tachykinin-like_peptides_receptor_86C
HVAEP1_T001390.1	NA	NA	NA	NA	NA	PTHR11365:SF10	HYDANTOINASE	PF01968; PF05378; PF06032	Hydantoinase/oxoprolinase; Hydantoinase/oxoprolinase N-terminal region; Protein of unknown function (DUF917)	APCC_AROAE;Acetophenone_carboxylase_gamma_subunit
HVAEP1_T001391.1	NA	NA	NA	NA	NA	NA	NA	PF00001	7 transmembrane receptor (rhodopsin family)	NA
HVAEP1_T001394.1	OG0000942	YEATS2	ENSG00000163872	YEATS domain containing 2	NA	PTHR23195:SF7	YEATS DOMAIN-CONTAINING PROTEIN 2	PF03366	YEATS family	YETS2_MOUSE;YEATS_domain-containing_protein_2
HVAEP1_T001396.1	NA	NA	NA	NA	NA	PTHR24230:SF75	ALLATOSTATIN A RECEPTOR 2, ISOFORM A	PF00001	7 transmembrane receptor (rhodopsin family)	APJ_MACMU;Apelin_receptor
HVAEP1_T001397.1	NA	NA	NA	NA	NA	NA	NA	PF00001	7 transmembrane receptor (rhodopsin family)	APJ_RAT;Apelin_receptor
HVAEP1_T001398.1	NA	NA	NA	NA	NA	PTHR24230:SF75	ALLATOSTATIN A RECEPTOR 2, ISOFORM A	PF00001	7 transmembrane receptor (rhodopsin family)	TLR1_DROME;Tachykinin-like_peptides_receptor_86C
HVAEP1_T001399.1	NA	NA	NA	NA	NA	PTHR45695:SF9	LEUCOKININ RECEPTOR-RELATED	PF00001	7 transmembrane receptor (rhodopsin family)	C3AR_DANRE;C3a_anaphylatoxin_chemotactic_receptor
HVAEP1_T001400.1	NA	NA	NA	NA	NA	PTHR45695:SF9	LEUCOKININ RECEPTOR-RELATED	PF00001	7 transmembrane receptor (rhodopsin family)	C3AR_DANRE;C3a_anaphylatoxin_chemotactic_receptor
HVAEP1_T001401.1	OG0004042	RRAGA, RRAGB	ENSG00000155876, ENSG00000083750	Ras related GTP binding B, Ras related GTP binding A	NA	PTHR11259:SF7	RAS-RELATED GTP-BINDING PROTEIN A	PF04670	Gtr1/RagA G protein conserved region	RRAGA_BOVIN;Ras-related_GTP-binding_protein_A
HVAEP1_T001402.1	OG0002864	BMS1	ENSG00000165733	BMS1 ribosome biogenesis factor	NA	PTHR12858:SF2	RIBOSOME BIOGENESIS PROTEIN BMS1 HOMOLOG	PF08142; PF04950	AARP2CN (NUC121) domain; 40S ribosome biogenesis protein Tsr1 and BMS1 C-terminal	BMS1_HUMAN;Ribosome_biogenesis_protein_BMS1_homolog
HVAEP1_T001403.1	NA	NA	NA	NA	NA	PTHR45695:SF9	LEUCOKININ RECEPTOR-RELATED	PF00001	7 transmembrane receptor (rhodopsin family)	C3AR_DANRE;C3a_anaphylatoxin_chemotactic_receptor
HVAEP1_T001405.1	NA	NA	NA	NA	NA	PTHR14413:SF16	39S RIBOSOMAL PROTEIN L17, MITOCHONDRIAL	PF01196	Ribosomal protein L17	RM17_BOVIN;39S_ribosomal_protein_L17,_mitochondrial
HVAEP1_T001406.3	OG0004183	TXNDC16	ENSG00000087301	thioredoxin domain containing 16	NA	PTHR22699	THIOREDOXIN DOMAIN-CONTAINING PROTEIN 16	PF00085; PF13848	Thioredoxin; Thioredoxin-like domain	TXD16_HUMAN;Thioredoxin_domain-containing_protein_16
HVAEP1_T001407.1	OG0000542	DGAT2L6, AWAT2, AWAT1, MOGAT3, DGAT2, MOGAT2, MOGAT1	ENSG00000184210, ENSG00000147160, ENSG00000204195, ENSG00000106384, ENSG00000062282, ENSG00000166391, ENSG00000124003	acyl-CoA wax alcohol acyltransferase 2, diacylglycerol O-acyltransferase 2 like 6, acyl-CoA wax alcohol acyltransferase 1, monoacylglycerol O-acyltransferase 3, diacylglycerol O-acyltransferase 2, monoacylglycerol O-acyltransferase 1, monoacylglycerol O-acyltransferase 2	NA	PTHR12317:SF0	DIACYLGLYCEROL O-ACYLTRANSFERASE 1	PF03982	Diacylglycerol acyltransferase	MOG2A_XENLA;2-acylglycerol_O-acyltransferase_2-A
HVAEP1_T001408.1	OG0001026	EIF4E2	ENSG00000135930	eukaryotic translation initiation factor 4E family member 2	AY197742.1; eIF4E-1	PTHR11960:SF17	EUKARYOTIC TRANSLATION INITIATION FACTOR 4E TYPE 2	PF01652	Eukaryotic initiation factor 4E	IF4E2_MOUSE;Eukaryotic_translation_initiation_factor_4E_type_2
HVAEP1_T001409.1	OG0005407	SMG9	ENSG00000105771	SMG9 nonsense mediated mRNA decay factor	NA	PTHR14270	UNCHARACTERIZED	NA	NA	SMG9_XENLA;Protein_SMG9
HVAEP1_T001411.1	OG0003895	ANKMY1	ENSG00000144504	ankyrin repeat and MYND domain containing 1	NA	PTHR15897	ANKYRIN REPEAT AND MYND DOMAIN PROTEIN 1	PF00023; PF01753; PF12796	Ankyrin repeat; MYND finger; Ankyrin repeats (3 copies)	ANKY1_HUMAN;Ankyrin_repeat_and_MYND_domain-containing_protein_1
HVAEP1_T001412.1	OG0000790	AP1S2, AP1S1, AP1S3	ENSG00000182287, ENSG00000106367, ENSG00000152056	adaptor related protein complex 1 subunit sigma 2, adaptor related protein complex 1 subunit sigma 1, adaptor related protein complex 1 subunit sigma 3	NA	PTHR11753:SF45	AP-1 COMPLEX SUBUNIT SIGMA-2	PF01217	Clathrin adaptor complex small chain	AP1S2_HUMAN;AP-1_complex_subunit_sigma-2
HVAEP1_T001413.1	OG0004717	DDX51, DDX51	ENSG00000288503, ENSG00000185163	DEAD-box helicase 51	NA	PTHR24031:SF68	ATP-DEPENDENT RNA HELICASE DDX51	PF00271; PF00270	Helicase conserved C-terminal domain; DEAD/DEAH box helicase	DDX51_DANRE;ATP-dependent_RNA_helicase_DDX51
HVAEP1_T001414.1	OG0000671	ARHGEF12, ARHGEF1, ARHGEF11	ENSG00000196914, ENSG00000076928, ENSG00000132694	uncharacterized LOC100505585, Rho guanine nucleotide exchange factor 1, Rho guanine nucleotide exchange factor 11, Rho guanine nucleotide exchange factor 12	NA	PTHR45872	RHO GUANINE NUCLEOTIDE EXCHANGE FACTOR 2, ISOFORM D	PF09128; PF17838; PF00621; PF00130	Regulator of G protein signalling-like domain; PH domain; RhoGEF domain; Phorbol esters/diacylglycerol binding domain (C1 domain)	ARHGB_HUMAN;Rho_guanine_nucleotide_exchange_factor_11
HVAEP1_T001415.2	NA	NA	NA	NA	NA	PTHR31025:SF18	SI:DKEY-286J15.1	NA	NA	NA
HVAEP1_T001417.1	OG0001394	TUBGCP3, TUBGCP3	ENSG00000126216, ENSG00000282003	tubulin gamma complex associated protein 3	NA	PTHR19302:SF14	GAMMA-TUBULIN COMPLEX COMPONENT 3	PF04130; PF17681	Gamma tubulin complex component C-terminal; Gamma tubulin complex component N-terminal	GCP3_XENLA;Gamma-tubulin_complex_component_3_homolog
HVAEP1_T001420.1	OG0000938	DCAF8, DCAF8L2, DCAF8L1	ENSG00000132716, ENSG00000189186, ENSG00000226372	DDB1 and CUL4 associated factor 8 like 1, DDB1 and CUL4 associated factor 8 like 2, DDB1 and CUL4 associated factor 8	NA	PTHR15574:SF21	DDB1- AND CUL4-ASSOCIATED FACTOR 8-RELATED	PF00400	WD domain, G-beta repeat	DCAF8_MOUSE;DDB1-_and_CUL4-associated_factor_8
HVAEP1_T001421.1	OG0004212	LRRC63	ENSG00000173988	leucine rich repeat containing 63	NA	PTHR45752:SF21	LEUCINE-RICH REPEAT-CONTAINING PROTEIN 63	NA	NA	LRC63_MOUSE;Leucine-rich_repeat-containing_protein_63
HVAEP1_T001423.1	OG0003813	AMMECR1L, AMMECR1	ENSG00000144233, ENSG00000101935	AMMECR nuclear protein 1, AMMECR1 like	NA	PTHR13016:SF2	AMME SYNDROME CANDIDATE GENE 1 PROTEIN	PF01871	AMMECR1	AMERL_MOUSE;AMMECR1-like_protein
HVAEP1_T001425.1	NA	NA	NA	NA	NA	NA	NA	PF06990	Galactose-3-O-sulfotransferase	G3ST3_BOVIN;Galactose-3-O-sulfotransferase_3
HVAEP1_T001426.2	OG0000206	RCBTB2, RCBTB1	ENSG00000136161, ENSG00000136144	RCC1 and BTB domain containing protein 2, RCC1 and BTB domain containing protein 1	NA	NA	NA	PF00651; PF00415	BTB/POZ domain; Regulator of chromosome condensation (RCC1) repeat	RCBT1_MOUSE;RCC1_and_BTB_domain-containing_protein_1
HVAEP1_T001427.1	NA	NA	NA	NA	NA	PTHR22752	G PROTEIN-COUPLED RECEPTOR	PF00001	7 transmembrane receptor (rhodopsin family)	GP161_DANRE;G-protein_coupled_receptor_161
HVAEP1_T001428.1	OG0006778	WDR53	ENSG00000185798	WD repeat domain 53	NA	PTHR44666	WD REPEAT-CONTAINING PROTEIN 53	NA	NA	WDR53_MOUSE;WD_repeat-containing_protein_53
HVAEP1_T001429.1	NA	NA	NA	NA	NA	NA	NA	NA	NA	TC3A_CAEEL;Transposable_element_Tc3_transposase
HVAEP1_T001430.2	OG0013456	COPS9	ENSG00000172428	COP9 signalosome subunit 9	NA	NA	NA	PF15004	Myeloma-overexpressed-like	CSN9_DANRE;COP9_signalosome_complex_subunit_9
HVAEP1_T001431.1	OG0004875	AKAP14	ENSG00000186471	A-kinase anchoring protein 14	NA	PTHR35075	A-KINASE ANCHOR PROTEIN 14	PF14469	28 kDa A-kinase anchor	AKA14_RAT;A-kinase_anchor_protein_14
HVAEP1_T001432.1	NA	NA	NA	NA	NA	PTHR10127:SF780	ASTACIN-LIKE METALLOENDOPEPTIDASE	PF01400	Astacin (Peptidase family M12A)	VMPA3_LOXIN;Astacin-like_metalloprotease_toxin_3
HVAEP1_T001433.1	OG0005034	RBMX2	ENSG00000134597	RNA binding motif protein X-linked 2	NA	PTHR45880:SF1	RNA-BINDING MOTIF PROTEIN, X-LINKED 2	PF00076	RNA recognition motif. (a.k.a. RRM, RBD, or RNP domain)	RBMX2_HUMAN;RNA-binding_motif_protein,_X-linked_2
HVAEP1_T001434.1	OG0000942	YEATS4	ENSG00000127337	YEATS domain containing 4	NA	PTHR47573	PROTEIN AF-9 HOMOLOG	PF03366	YEATS family	YETS4_HUMAN;YEATS_domain-containing_protein_4
HVAEP1_T001439.1	OG0002525	ALDH5A1	ENSG00000112294	aldehyde dehydrogenase 5 family member A1	NA	PTHR43353:SF5	SUCCINATE-SEMIALDEHYDE DEHYDROGENASE, MITOCHONDRIAL	PF00171	Aldehyde dehydrogenase family	SSDH_RAT;Succinate-semialdehyde_dehydrogenase,_mitochondrial
HVAEP1_T001440.1	NA	NA	NA	NA	NA	NA	NA	PF03184	DDE superfamily endonuclease	NA
HVAEP1_T001442.1	OG0007919	#NAME?	FBgn0266172	NA	NA	NA	NA	NA	NA	NA
HVAEP1_T001443.1	OG0000007	ZMYM1	ENSG00000197056	zinc finger MYM-type containing 1	NA	PTHR45749:SF11	AC-LIKE TRANSPOSASE-RELATED	PF14291	Domain of unknown function (DUF4371)	NA
HVAEP1_T001444.1	OG0001159	TM9SF2	ENSG00000125304	transmembrane 9 superfamily member 2	NA	PTHR10766:SF36	TRANSMEMBRANE 9 SUPERFAMILY MEMBER 2	PF02990	Endomembrane protein 70	TM9S2_RAT;Transmembrane_9_superfamily_member_2
HVAEP1_T001445.1	OG0006164	TMEM192	ENSG00000170088	transmembrane protein 192	NA	PTHR31592:SF1	TRANSMEMBRANE PROTEIN 192	PF14802	TMEM192 family	TM192_DANRE;Transmembrane_protein_192
HVAEP1_T001447.1	OG0000005	dop-5	WBGene00011382	DOPamine receptor	NA	NA	NA	PF00001	7 transmembrane receptor (rhodopsin family)	OCTB1_DROME;Octopamine_receptor_beta-1R
HVAEP1_T001448.3	NA	NA	NA	NA	NA	NA	NA	PF12796	Ankyrin repeats (3 copies)	NA
HVAEP1_T001452.1	NA	NA	NA	NA	NA	PTHR46791	EXPRESSED PROTEIN	NA	NA	NA
HVAEP1_T001454.1	OG0001186	RAB6A, RAB6C, RAB6D, RAB6B	ENSG00000175582, ENSG00000222014, ENSG00000233087, ENSG00000154917	RAB6A, member RAS oncogene family, RAB6C, member RAS oncogene family, RAB6B, member RAS oncogene family, RAB6D, member RAS oncogene family	NA	PTHR24073:SF343	RAS-RELATED PROTEIN RAB-6B	PF00071	Ras family	RAB6_DROME;Ras-related_protein_Rab6
HVAEP1_T001455.1	OG0000615	PLSCR2, PLSCR1, PLSCR4, PLSCR5, PLSCR3, PLSCR3	ENSG00000163746, ENSG00000188313, ENSG00000114698, ENSG00000231213, ENSG00000284009, ENSG00000187838	phospholipid scramblase 3, phospholipid scramblase 4, phospholipid scramblase 2, phospholipid scramblase 1, phospholipid scramblase family member 5	NA	PTHR23248:SF38	PHOSPHOLIPID SCRAMBLASE 1	PF03803	Scramblase	PLS1_MOUSE;Phospholipid_scramblase_1
HVAEP1_T001456.1	OG0003757	UBA2	ENSG00000126261	ubiquitin like modifier activating enzyme 2	NA	PTHR10953:SF5	SUMO-ACTIVATING ENZYME SUBUNIT 2	PF14732; PF00899	Ubiquitin/SUMO-activating enzyme ubiquitin-like domain; ThiF family	SAE2_XENTR;SUMO-activating_enzyme_subunit_2
HVAEP1_T001457.1	OG0005328	COG8	ENSG00000213380	component of oligomeric golgi complex 8	NA	PTHR21311	CONSERVED OLIGOMERIC GOLGI COMPLEX COMPONENT 8	PF04124	Dor1-like family	COG8_BOVIN;Conserved_oligomeric_Golgi_complex_subunit_8
HVAEP1_T001458.1	OG0005149	NFRKB	ENSG00000170322	nuclear factor related to kappaB binding protein	NA	PTHR13052:SF0	NUCLEAR FACTOR RELATED TO KAPPA-B-BINDING PROTEIN	PF14465	NFRKB Winged Helix-like	NFRKB_HUMAN;Nuclear_factor_related_to_kappa-B-binding_protein
HVAEP1_T001459.1	NA	NA	NA	NA	NA	PTHR45672:SF11	PROTEIN DISULFIDE-ISOMERASE C17H9.14C	PF00085; PF07749	Thioredoxin; Endoplasmic reticulum protein ERp29, C-terminal domain	PDI22_ORYSJ;Protein_disulfide_isomerase-like_2-2
HVAEP1_T001461.1	OG0001877	SAG, SAG, ARR3, ARRB1, ARRB2	ENSG00000281857, ENSG00000130561, ENSG00000120500, ENSG00000137486, ENSG00000141480	S-antigen visual arrestin, arrestin 3, arrestin beta 2, arrestin beta 1	NA	PTHR11792:SF17	KURTZ ARRESTIN	PF00339; PF02752	Arrestin (or S-antigen), N-terminal domain; Arrestin (or S-antigen), C-terminal domain	ARRB2_HUMAN;Beta-arrestin-2
HVAEP1_T001462.1	OG0003013	CG17387	FBgn0037276	NA	NA	PTHR18962	COILED-COIL DOMAIN-CONTAINING PROTEIN 39	NA	NA	CCD39_XENTR;Coiled-coil_domain-containing_protein_39
HVAEP1_T001464.1	NA	NA	NA	NA	NA	NA	NA	NA	NA	PTPRF_DANRE;Receptor-type_tyrosine-protein_phosphatase_F
HVAEP1_T001465.1	OG0000081	TSSK4, TSSK4	ENSG00000285140, ENSG00000139908	testis specific serine kinase 4	NA	PTHR24343:SF76	TESTIS-SPECIFIC SERINE/THREONINE-PROTEIN KINASE 1	PF00069	Protein kinase domain	TSSK1_MOUSE;Testis-specific_serine/threonine-protein_kinase_1
HVAEP1_T001466.1	OG0005780	ZC3H13	ENSG00000123200	zinc finger CCCH-type containing 13	NA	PTHR38563	FL(2)D-ASSOCIATED COMPLEX COMPONENT	NA	NA	NA
HVAEP1_T001467.1	OG0000906	RFC4	ENSG00000163918	replication factor C subunit 4	NA	PTHR11669:SF20	REPLICATION FACTOR C SUBUNIT 4	PF00004	ATPase family associated with various cellular activities (AAA)	RFC4_HUMAN;Replication_factor_C_subunit_4
HVAEP1_T001468.2	NA	NA	NA	NA	NA	NA	NA	PF05485	THAP domain	PTPRF_DANRE;Receptor-type_tyrosine-protein_phosphatase_F
HVAEP1_T001469.1	OG0000520	F35B12.10	WBGene00009389	hypothetical protein	AM233901.1; Cerberus-like precursor (crb1 gene)	NA	NA	PF03045	DAN domain	CER1_XENLA;Cerberus
HVAEP1_T001472.1	OG0000906	RFC4	ENSG00000163918	replication factor C subunit 4	NA	PTHR11669:SF20	REPLICATION FACTOR C SUBUNIT 4	PF08542; PF00004	Replication factor C C-terminal domain; ATPase family associated with various cellular activities (AAA)	RFC4_MOUSE;Replication_factor_C_subunit_4
HVAEP1_T001473.1	OG0006435	HAUS5	ENSG00000249115	HAUS augmin like complex subunit 5	NA	PTHR28588	HAUS AUGMIN-LIKE COMPLEX SUBUNIT 5	PF14817	HAUS augmin-like complex subunit 5	NA
HVAEP1_T001474.1	OG0000678	PCCA	ENSG00000175198	propionyl-CoA carboxylase subunit alpha	NA	PTHR18866:SF33	METHYLCROTONOYL-COA CARBOXYLASE SUBUNIT ALPHA, MITOCHONDRIAL-RELATED	PF02786; PF02785; PF00364; PF00289; PF18140	Carbamoyl-phosphate synthase L chain, ATP binding domain; Biotin carboxylase C-terminal domain; Biotin-requiring enzyme; Biotin carboxylase, N-terminal domain; Propionyl-coenzyme A carboxylase BT domain	PCCA_HUMAN;Propionyl-CoA_carboxylase_alpha_chain,_mitochondrial
HVAEP1_T001478.1	NA	NA	NA	NA	NA	NA	NA	PF01710	Transposase	NA
HVAEP1_T001479.1	OG0000427	ECT2	ENSG00000114346	epithelial cell transforming 2	NA	PTHR16777	PROTEIN ECT2	PF12738; PF00533; PF00621	twin BRCT domain; BRCA1 C Terminus (BRCT) domain; RhoGEF domain	ECT2_HUMAN;Protein_ECT2
HVAEP1_T001486.1	OG0007363	RPP38	ENSG00000152464	ribonuclease P/MRP subunit p38	NA	PTHR46948	RIBONUCLEASE P PROTEIN SUBUNIT P38	PF01248	Ribosomal protein L7Ae/L30e/S12e/Gadd45 family	RPP38_MOUSE;Ribonuclease_P_protein_subunit_p38
HVAEP1_T001487.1	OG0002079	ARHGEF6, ARHGEF7	ENSG00000129675, ENSG00000102606	Rho guanine nucleotide exchange factor 7, Rac/Cdc42 guanine nucleotide exchange factor 6	NA	PTHR46026	RHO-TYPE GUANINE NUCLEOTIDE EXCHANGE FACTOR, ISOFORM F	PF00018; PF00621	SH3 domain; RhoGEF domain	ARHG7_HUMAN;Rho_guanine_nucleotide_exchange_factor_7
HVAEP1_T001488.1	OG0000219	FARP2, FARP1	ENSG00000006607, ENSG00000152767	FERM, ARH/RhoGEF and pleckstrin domain protein 1, FERM, ARH/RhoGEF and pleckstrin domain protein 2	NA	PTHR45858	FERM DOMAIN CONTAINING PROTEIN	PF09380; PF00621; PF00169; PF09379; PF00373	FERM C-terminal PH-like domain; RhoGEF domain; PH domain; FERM N-terminal domain; FERM central domain	FARP2_MOUSE;FERM,_ARHGEF_and_pleckstrin_domain-containing_protein_2
HVAEP1_T001489.1	OG0000097	RNF13, ZNRF4, RNF167	ENSG00000082996, ENSG00000105428, ENSG00000108523	zinc and ring finger 4, ring finger protein 167, ring finger protein 13	NA	PTHR22765:SF35	E3 UBIQUITIN-PROTEIN LIGASE RNF167	PF13639; PF02225	Ring finger domain; PA domain	RNF13_BOVIN;E3_ubiquitin-protein_ligase_RNF13
HVAEP1_T001490.1	OG0000505	PSMC4, PSMC4	ENSG00000281221, ENSG00000013275	proteasome 26S subunit, ATPase 4	NA	PTHR23073:SF120	26S PROTEASOME REGULATORY SUBUNIT 6B HOMOLOG	PF16450; PF00004; PF17862	Proteasomal ATPase OB C-terminal domain; ATPase family associated with various cellular activities (AAA); AAA+ lid domain	PRS6B_BOVIN;26S_proteasome_regulatory_subunit_6B
HVAEP1_T001491.1	OG0003992	ZBBX	ENSG00000169064	zinc finger B-box domain containing	NA	PTHR28634	ZINC FINGER B-BOX DOMAIN-CONTAINING PROTEIN 1	NA	NA	NA
HVAEP1_T001492.1	OG0001486	EFHC2	ENSG00000183690	EF-hand domain containing 2	NA	PTHR12086:SF11	EF-HAND DOMAIN-CONTAINING FAMILY MEMBER C2	PF06565	DUF1126 PH-like domain	EFHC2_CHICK;EF-hand_domain-containing_family_member_C2
HVAEP1_T001495.1	OG0006696	NUSAP1	ENSG00000137804	nucleolar and spindle associated protein 1	NA	PTHR15874	NUCLEOLAR AND SPINDLE-ASSOCIATED PROTEIN 1	PF16006	Nucleolar and spindle-associated protein	NA
HVAEP1_T001501.2	NA	NA	NA	NA	NA	NA	NA	PF00630; PF00307	Filamin/ABP280 repeat; Calponin homology (CH) domain	FLNA_MOUSE;Filamin-A
HVAEP1_T001503.1	OG0001134	VRTN	ENSG00000133980	vertebrae development associated	NA	NA	NA	NA	NA	NA
HVAEP1_T001504.1	OG0000790	AP1S2, AP1S1, AP1S3	ENSG00000182287, ENSG00000106367, ENSG00000152056	adaptor related protein complex 1 subunit sigma 2, adaptor related protein complex 1 subunit sigma 1, adaptor related protein complex 1 subunit sigma 3	NA	PTHR11753:SF45	AP-1 COMPLEX SUBUNIT SIGMA-2	PF01217	Clathrin adaptor complex small chain	AP1S2_HUMAN;AP-1_complex_subunit_sigma-2
HVAEP1_T001505.1	OG0003540	DDX6	ENSG00000110367	DEAD-box helicase 6	NA	PTHR47960:SF5	DEAD-BOX ATP-DEPENDENT RNA HELICASE 6	PF00270; PF00271	DEAD/DEAH box helicase; Helicase conserved C-terminal domain	DDX6_CHICK;Probable_ATP-dependent_RNA_helicase_DDX6
HVAEP1_T001508.1	NA	NA	NA	NA	NA	PTHR45736:SF7	ZINC FINGER MYM-TYPE PROTEIN 5	NA	NA	ZMYM5_HUMAN;Zinc_finger_MYM-type_protein_5
HVAEP1_T001509.1	OG0000007	ZMYM1	ENSG00000197056	zinc finger MYM-type containing 1	NA	PTHR45749:SF11	AC-LIKE TRANSPOSASE-RELATED	PF14291	Domain of unknown function (DUF4371)	NA
HVAEP1_T001511.1	OG0000150	MYO7B, MYO7A	ENSG00000169994, ENSG00000137474	myosin VIIA, myosin VIIB	NA	PTHR22692:SF19	MYOSIN VIIA	PF00373; PF00784; PF00612; PF00063	FERM central domain; MyTH4 domain; IQ calmodulin-binding motif; Myosin head (motor domain)	MYO7A_AEDAE;Myosin-VIIa
HVAEP1_T001512.2	OG0000628	PKNOX2, PKNOX1	ENSG00000165495, ENSG00000160199	PBX/knotted 1 homeobox 1, PBX/knotted 1 homeobox 2	NA	NA	NA	PF05920; PF16493	Homeobox KN domain; N-terminal of Homeobox Meis and PKNOX1	PKNX2_MOUSE;Homeobox_protein_PKNOX2
HVAEP1_T001514.1	OG0005523	BLZF1	ENSG00000117475	basic leucine zipper nuclear factor 1	NA	PTHR13066	BASIC LEUCINE ZIPPER NUCLEAR FACTOR 1 BLZF1 PROTEIN	NA	NA	GO45_HUMAN;Golgin-45
HVAEP1_T001515.1	OG0003859	COG3	ENSG00000136152	component of oligomeric golgi complex 3	NA	PTHR13302	CONSERVED OLIGOMERIC GOLGI COMPLEX COMPONENT 3	PF04136	Sec34-like family	COG3_MOUSE;Conserved_oligomeric_Golgi_complex_subunit_3
HVAEP1_T001518.1	NA	NA	NA	NA	NA	NA	NA	PF00053; PF01344; PF13418	Laminin EGF domain; Kelch motif; Galactose oxidase, central domain	MEGF8_MOUSE;Multiple_epidermal_growth_factor-like_domains_protein_8
HVAEP1_T001519.1	OG0004534	TMEM164	ENSG00000157600	transmembrane protein 164	NA	PTHR20948	UNCHARACTERIZED	PF14808	TMEM164 family	TM164_HUMAN;Transmembrane_protein_164
HVAEP1_T001520.1	OG0007237	TBRG1	ENSG00000154144	transforming growth factor beta regulator 1	NA	PTHR22715	TRANSFORMING GROWTH FACTOR BETA REGULATED GENE 1	PF05965; PF05964	F/Y rich C-terminus; F/Y-rich N-terminus	TBRG1_HUMAN;Transforming_growth_factor_beta_regulator_1
HVAEP1_T001521.1	NA	NA	NA	NA	NA	PTHR24247:SF202	SEROTONIN/OCTOPAMINE RECEPTOR FAMILY	PF00001	7 transmembrane receptor (rhodopsin family)	NA
HVAEP1_T001522.1	NA	NA	NA	NA	NA	PTHR11040:SF168	ZINC TRANSPORTER ZIP3	PF02535	ZIP Zinc transporter	S39A1_DANRE;Zinc_transporter_ZIP1
HVAEP1_T001524.1	OG0001376	ERICH6B, ERICH6	ENSG00000165837, ENSG00000163645	glutamate rich 6B, glutamate rich 6	NA	PTHR23093	SIMILAR TO CHROMOSOME 3 OPEN READING FRAME 20	PF14977	FAM194 protein	ERIP6_RAT;Glutamate-rich_protein_6
HVAEP1_T001527.1	OG0005744	ATP6AP2	ENSG00000182220	ATPase H+ transporting accessory protein 2	NA	PTHR13351	RENIN RECEPTOR	PF07850	Renin receptor-like protein	RENR_MOUSE;Renin_receptor
HVAEP1_T001528.1	OG0003029	BCORL1, BCOR	ENSG00000085185, ENSG00000183337	BCL6 corepressor, BCL6 corepressor like 1	NA	PTHR24117	AGAP007537-PB	PF12796	Ankyrin repeats (3 copies)	NA
HVAEP1_T001529.1	NA	NA	NA	NA	NA	PTHR33053:SF18	AGAP000105-PA	NA	NA	NA
HVAEP1_T001533.1	OG0000241	GGT5, GGTLC3, GGT2, GGTLC1, GGT1, GGTLC2	ENSG00000099998, ENSG00000274252, ENSG00000133475, ENSG00000149435, ENSG00000100031, ENSG00000100121	gamma-glutamyltransferase light chain 1, gamma-glutamyltransferase 2, gamma-glutamyltransferase light chain family member 3, gamma-glutamyltransferase 1, gamma-glutamyltransferase 5, gamma-glutamyltransferase light chain 2	NA	PTHR11686	GAMMA GLUTAMYL TRANSPEPTIDASE	PF01019	Gamma-glutamyltranspeptidase	GGT1_PIG;Glutathione_hydrolase_1_proenzyme
HVAEP1_T001534.1	OG0002838	ubc-19	WBGene00006714	UBiquitin Conjugating enzyme	NA	PTHR24067:SF294	PROTEIN CROSSBRONX-RELATED	PF00179	Ubiquitin-conjugating enzyme	AKTIP_MOUSE;AKT-interacting_protein
HVAEP1_T001536.1	NA	NA	NA	NA	NA	NA	NA	PF02944	BESS motif	NA
HVAEP1_T001537.1	NA	NA	NA	NA	NA	PTHR22930:SF207	SIMILAR TO ENSANGP00000010363	NA	NA	NA
HVAEP1_T001538.1	OG0000591	KAT7	ENSG00000136504	lysine acetyltransferase 7	NA	PTHR10615:SF102	HISTONE ACETYLTRANSFERASE KAT7	PF00628; PF01853; PF17772	PHD-finger; MOZ/SAS family; MYST family zinc finger domain	KAT7_HUMAN;Histone_acetyltransferase_KAT7
HVAEP1_T001540.1	OG0002473	PHLDB3, PHLDB2, PHLDB1	ENSG00000176531, ENSG00000144824, ENSG00000019144	pleckstrin homology like domain family B member 3, pleckstrin homology like domain family B member 2, pleckstrin homology like domain family B member 1	NA	PTHR12156	PLECKSTRIN HOMOLOGY-LIKE DOMAIN, FAMILY B, MEMBER 3	PF00225; PF00169	Kinesin motor domain; PH domain	KI16B_HUMAN;Kinesin-like_protein_KIF16B
HVAEP1_T001542.1	OG0001221	GK5	ENSG00000175066	glycerol kinase 5	NA	PTHR10196:SF68	GLYCEROL KINASE 5-RELATED	PF00370; PF02782	FGGY family of carbohydrate kinases, N-terminal domain; FGGY family of carbohydrate kinases, C-terminal domain	GLPK5_BOVIN;Putative_glycerol_kinase_5
HVAEP1_T001543.1	OG0006800	MRPL41	ENSG00000182154	mitochondrial ribosomal protein L41	NA	PTHR21338	MITOCHONDRIAL RIBOSOMAL PROTEIN L41	PF09809	Mitochondrial ribosomal protein L27	RM41A_XENLA;39S_ribosomal_protein_L41-A,_mitochondrial
HVAEP1_T001544.1	OG0000654	RUBCNL, RUBCN	ENSG00000102445, ENSG00000145016	rubicon like autophagy enhancer, rubicon autophagy regulator	NA	PTHR45971:SF3	RUN DOMAIN BECLIN-1-INTERACTING AND CYSTEINE-RICH DOMAIN-CONTAINING PROTEIN	PF13901	Putative zinc-RING and/or ribbon	RUBIC_MOUSE;Run_domain_Beclin-1-interacting_and_cysteine-rich_domain-containing_protein
HVAEP1_T001545.1	NA	NA	NA	NA	NA	PTHR11474:SF76	TYROSINASE	PF00264	Common central domain of tyrosinase	TYRO_STRAT;Tyrosinase
HVAEP1_T001546.1	NA	NA	NA	NA	NA	PTHR11474:SF76	TYROSINASE	PF00264	Common central domain of tyrosinase	TYRO_STRGA;Tyrosinase
HVAEP1_T001550.1	OG0001204	PPP2R3A, PPP2R3B, PPP2R3B, PPP2R3B	ENSG00000073711, ENSG00000167393, ENSG00000276438, ENSG00000273850	protein phosphatase 2 regulatory subunit B''beta, protein phosphatase 2 regulatory subunit B''alpha	NA	PTHR14095	PHOSPHATASE 2A REGULATORY SUBUNIT-RELATED	PF17958; PF13499	EF-hand domain; EF-hand domain pair	P2R3B_HUMAN;Serine/threonine-protein_phosphatase_2A_regulatory_subunit_B''_subunit_beta
HVAEP1_T001551.1	NA	NA	NA	NA	NA	PTHR24543	MULTICOPPER OXIDASE-RELATED	PF00090; PF00754; PF00092	Thrombospondin type 1 domain; F5/8 type C domain; von Willebrand factor type A domain	COSA1_HUMAN;Collagen_alpha-1(XXVIII)_chain
HVAEP1_T001552.1	OG0004110	tag-89	WBGene00006459	hypothetical protein	NA	NA	NA	PF00001	7 transmembrane receptor (rhodopsin family)	OCTB1_DROME;Octopamine_receptor_beta-1R
HVAEP1_T001553.1	OG0005975	BAG1	ENSG00000107262	BAG cochaperone 1	NA	PTHR12329:SF16	BAG FAMILY MOLECULAR CHAPERONE REGULATOR 1	PF02179	BAG domain	BAG1_HUMAN;BAG_family_molecular_chaperone_regulator_1
HVAEP1_T001554.1	OG0000308	DYNLT2B	ENSG00000213123	dynein light chain Tctex-type 2B	NA	PTHR21255:SF7	TCTEX1 DOMAIN-CONTAINING PROTEIN 2	PF03645	Tctex-1 family	DYT2B_DANRE;Dynein_light_chain_Tctex-type_protein_2B
HVAEP1_T001555.1	NA	NA	NA	NA	NA	NA	NA	PF00169; PF02181	PH domain; Formin Homology 2 Domain	FORF_DICDI;Formin-F
HVAEP1_T001558.1	OG0005637	SDHD	ENSG00000204370	succinate dehydrogenase complex subunit D	NA	PTHR13337:SF2	SUCCINATE DEHYDROGENASE [UBIQUINONE] CYTOCHROME B SMALL SUBUNIT, MITOCHONDRIAL	PF05328	CybS, succinate dehydrogenase cytochrome B small subunit	DHSD_MOUSE;Succinate_dehydrogenase_[ubiquinone]_cytochrome_b_small_subunit,_mitochondrial
HVAEP1_T001559.1	OG0000113	CIC	ENSG00000079432	capicua transcriptional repressor	NA	PTHR13059:SF13	TRANSCRIPTION FACTOR CAPICUA-RELATED	PF16090; PF00505	Domain of unknown function (DUF4819); HMG (high mobility group) box	CIC_HUMAN;Protein_capicua_homolog
HVAEP1_T001560.1	NA	NA	NA	NA	NA	NA	NA	PF02181; PF00169	Formin Homology 2 Domain; PH domain	FORF_DICDI;Formin-F
HVAEP1_T001561.1	NA	NA	NA	NA	NA	NA	NA	PF02902	Ulp1 protease family, C-terminal catalytic domain	NA
HVAEP1_T001562.1	NA	NA	NA	NA	NA	NA	NA	PF01541	GIY-YIG catalytic domain	NA
HVAEP1_T001563.1	OG0000723	USP9X, USP9Y	ENSG00000124486, ENSG00000114374	testis-specific transcript, Y-linked 15, ubiquitin specific peptidase 9 Y-linked, ubiquitin specific peptidase 9 X-linked	NA	PTHR24006:SF802	UBIQUITIN CARBOXYL-TERMINAL HYDROLASE FAF-X-RELATED	PF12030; PF00443	Domain of unknown function (DUF3517); Ubiquitin carboxyl-terminal hydrolase	USP9X_HUMAN;Probable_ubiquitin_carboxyl-terminal_hydrolase_FAF-X
HVAEP1_T001564.3	OG0001062	ANKS3	ENSG00000168096	ankyrin repeat and sterile alpha motif domain containing 3	NA	PTHR24184:SF6	ANKYRIN REPEAT AND SAM DOMAIN-CONTAINING PROTEIN 3	PF00536; PF12796	SAM domain (Sterile alpha motif); Ankyrin repeats (3 copies)	ANKS3_RAT;Ankyrin_repeat_and_SAM_domain-containing_protein_3
HVAEP1_T001565.1	OG0002556	CHEK1	ENSG00000149554	checkpoint kinase 1	NA	PTHR43895:SF116	SERINE/THREONINE-PROTEIN KINASE CHK1	PF00069	Protein kinase domain	CHK1_HUMAN;Serine/threonine-protein_kinase_Chk1
HVAEP1_T001566.1	NA	NA	NA	NA	NA	PTHR12231:SF252	ROUNDABOUT 1, ISOFORM A	PF13895	Immunoglobulin domain	HMCN1_MOUSE;Hemicentin-1
HVAEP1_T001567.1	NA	NA	NA	NA	NA	NA	NA	PF00057; PF00041	Low-density lipoprotein receptor domain class A; Fibronectin type III domain	DCC_HUMAN;Netrin_receptor_DCC
HVAEP1_T001568.1	NA	NA	NA	NA	NA	NA	NA	PF00057; PF00041	Low-density lipoprotein receptor domain class A; Fibronectin type III domain	NA
HVAEP1_T001569.1	OG0006457	MRI1	ENSG00000037757	methylthioribose-1-phosphate isomerase 1	NA	PTHR43475	METHYLTHIORIBOSE-1-PHOSPHATE ISOMERASE	PF01008	Initiation factor 2 subunit family	MTNA_ANOGA;Methylthioribose-1-phosphate_isomerase
HVAEP1_T001570.1	OG0004674	RCL1	ENSG00000120158	RNA terminal phosphate cyclase like 1	NA	PTHR11096:SF1	RNA 3'-TERMINAL PHOSPHATE CYCLASE-LIKE PROTEIN	PF05189; PF01137	RNA 3'-terminal phosphate cyclase (RTC), insert domain; RNA 3'-terminal phosphate cyclase	RCL1_HUMAN;RNA_3'-terminal_phosphate_cyclase-like_protein
HVAEP1_T001571.1	OG0000147	MFS9	FBgn0038799	NA	NA	PTHR11662:SF437	GH23975P	PF07690	Major Facilitator Superfamily	VGLU3_DANRE;Vesicular_glutamate_transporter_3
HVAEP1_T001572.2	OG0001369	ILVBL	ENSG00000105135	ilvB acetolactate synthase like	NA	PTHR18968:SF13	ACETOLACTATE SYNTHASE-LIKE PROTEIN	PF00205; PF02775; PF02776	Thiamine pyrophosphate enzyme, central domain; Thiamine pyrophosphate enzyme, C-terminal TPP binding domain; Thiamine pyrophosphate enzyme, N-terminal TPP binding domain	HACL2_DANRE;2-hydroxyacyl-CoA_lyase_2
HVAEP1_T001573.1	NA	NA	NA	NA	NA	PTHR11360:SF251	KARMOISIN, ISOFORM B	PF07690	Major Facilitator Superfamily	MOT14_MOUSE;Monocarboxylate_transporter_14
HVAEP1_T001574.1	OG0001231	C16orf96	ENSG00000205832	chromosome 16 open reading frame 96	NA	NA	NA	PF16043	Domain of unknown function (DUF4795)	NA
HVAEP1_T001577.1	NA	NA	NA	NA	NA	NA	NA	PF00041	Fibronectin type III domain	NA
HVAEP1_T001578.1	NA	NA	NA	NA	KC701505.1; arminin 7591	NA	NA	NA	NA	NA
HVAEP1_T001579.1	NA	NA	NA	NA	KC701507.1; arminin 7519	NA	NA	NA	NA	NA
HVAEP1_T001580.1	OG0006966	C19orf44	ENSG00000105072	chromosome 19 open reading frame 44	NA	PTHR22409	UNCHARACTERIZED	PF15391	Domain of unknown function (DUF4614)	CS044_RAT;Uncharacterized_protein_C19orf44_homolog
HVAEP1_T001582.1	OG0001206	LMOD3, LMOD1, LMOD2, TMOD2, TMOD3, TMOD4, TMOD1	ENSG00000163380, ENSG00000163431, ENSG00000170807, ENSG00000128872, ENSG00000138594, ENSG00000163157, ENSG00000136842	tropomodulin 1, uncharacterized LOC112268148, tropomodulin 3, tropomodulin 2, leiomodin 2, leiomodin 3, leiomodin 1, tropomodulin 4	NA	NA	NA	NA	NA	TMOD1_MOUSE;Tropomodulin-1
HVAEP1_T001583.1	NA	NA	NA	NA	NA	NA	NA	PF09588	YqaJ-like viral recombinase domain	NA
HVAEP1_T001584.1	NA	NA	NA	NA	NA	PTHR16059:SF25	THROMBOSPONDIN-RELATED ANONYMOUS PROTEIN	NA	NA	NA
HVAEP1_T001587.1	OG0006014	URM1	ENSG00000167118	ubiquitin related modifier 1	NA	PTHR14986	RURM1 PROTEIN	PF09138	Urm1 (Ubiquitin related modifier)	URM1_BOVIN;Ubiquitin-related_modifier_1
HVAEP1_T001588.1	NA	NA	NA	NA	NA	NA	NA	PF16041	Domain of unknown function (DUF4793)	NA
HVAEP1_T001591.1	OG0001182	SAMD3	ENSG00000164483	sterile alpha motif domain containing 3	NA	NA	NA	NA	NA	SAMD3_MOUSE;Sterile_alpha_motif_domain-containing_protein_3
HVAEP1_T001592.1	NA	NA	NA	NA	NA	NA	NA	PF02944	BESS motif	NA
HVAEP1_T001593.1	NA	NA	NA	NA	NA	NA	NA	PF10545	Alcohol dehydrogenase transcription factor Myb/SANT-like	NA
HVAEP1_T001597.1	NA	NA	NA	NA	NA	PTHR22588:SF3	COLLAGEN, TYPE VI, ALPHA 4A	PF00092	von Willebrand factor type A domain	VITRN_MOUSE;Vitrin
HVAEP1_T001600.3	OG0000024	vcam1	ENSXETG00000013241	vascular cell adhesion molecule 1	NA	PTHR46013	VASCULAR CELL ADHESION MOLECULE 1	PF06119; PF13895	Nidogen-like; Immunoglobulin domain	TITIN_HUMAN;Titin
HVAEP1_T001601.1	OG0001939	DDAH2, DDAH2, DDAH2, DDAH2, DDAH2, DDAH2, DDAH2, DDAH1	ENSG00000228128, ENSG00000225635, ENSG00000227317, ENSG00000233076, ENSG00000226634, ENSG00000206395, ENSG00000213722, ENSG00000153904	dimethylarginine dimethylaminohydrolase 2, dimethylarginine dimethylaminohydrolase 1	NA	PTHR12737:SF9	GM09012P	NA	NA	DDAH1_HUMAN;N(G),N(G)-dimethylarginine_dimethylaminohydrolase_1
HVAEP1_T001602.1	OG0004911	TTC12	ENSG00000149292	tetratricopeptide repeat domain 12	NA	PTHR46540	TETRATRICOPEPTIDE REPEAT PROTEIN 12	PF13181; PF13414	Tetratricopeptide repeat; TPR repeat	TTC12_HUMAN;Tetratricopeptide_repeat_protein_12
HVAEP1_T001603.1	OG0003366	APP, APLP1, APLP2	ENSG00000142192, ENSG00000105290, ENSG00000084234	amyloid beta precursor protein, amyloid beta precursor like protein 1, amyloid beta precursor like protein 2	NA	PTHR23103:SF15	AMYLOID-BETA-LIKE PROTEIN	PF12924; PF12925; PF10515; PF02177	Copper-binding of amyloid precursor, CuBD; E2 domain of amyloid precursor protein; Beta-amyloid precursor protein C-terminus; Amyloid A4 N-terminal heparin-binding	A4_TAKRU;Amyloid-beta_A4_protein
HVAEP1_T001605.1	OG0001764	CABYR	ENSG00000154040	calcium binding tyrosine phosphorylation regulated	NA	PTHR10699:SF16	SPERM SURFACE PROTEIN SP17	PF00612; PF02197	IQ calmodulin-binding motif; Regulatory subunit of type II PKA R-subunit	SP17_MOUSE;Sperm_surface_protein_Sp17
HVAEP1_T001606.1	OG0004363	DKC1	ENSG00000130826	dyskerin pseudouridine synthase 1	NA	PTHR23127:SF0	H/ACA RIBONUCLEOPROTEIN COMPLEX SUBUNIT DKC1	PF01509; PF08068; PF16198; PF01472	TruB family pseudouridylate synthase (N terminal domain); DKCLD (NUC011) domain; tRNA pseudouridylate synthase B C-terminal domain; PUA domain	DKC1_HUMAN;H/ACA_ribonucleoprotein_complex_subunit_DKC1
HVAEP1_T001607.1	OG0000602	FTH1, FTHL17, FTMT, FTL	ENSG00000167996, ENSG00000132446, ENSG00000181867, ENSG00000087086	ferritin heavy chain like 17, ferritin mitochondrial, ferritin light chain, ferritin heavy chain 1	NA	PTHR11431:SF75	FERRITIN	PF00210	Ferritin-like domain	FRIH_TREBE;Ferritin,_heavy_subunit
HVAEP1_T001608.2	OG0001882	PANK4, PANK4	ENSG00000273494, ENSG00000157881	pantothenate kinase 4 (inactive)	NA	PTHR12280:SF39	PANTOTHENATE KINASE 2	PF01937; PF03630	Protein of unknown function DUF89; Fumble	PANK4_HUMAN;4'-phosphopantetheine_phosphatase
HVAEP1_T001609.1	OG0001939	DDAH2, DDAH2, DDAH2, DDAH2, DDAH2, DDAH2, DDAH2, DDAH1	ENSG00000228128, ENSG00000225635, ENSG00000227317, ENSG00000233076, ENSG00000226634, ENSG00000206395, ENSG00000213722, ENSG00000153904	dimethylarginine dimethylaminohydrolase 2, dimethylarginine dimethylaminohydrolase 1	NA	PTHR12737:SF9	GM09012P	PF02274	Amidinotransferase	DDAH1_MOUSE;N(G),N(G)-dimethylarginine_dimethylaminohydrolase_1
HVAEP1_T001611.1	OG0005786	RNF168, RNF169	ENSG00000163961, ENSG00000166439	ring finger protein 169, ring finger protein 168	NA	PTHR23328:SF1	E3 UBIQUITIN-PROTEIN LIGASE RNF168	PF00097	Zinc finger, C3HC4 type (RING finger)	RN168_XENTR;E3_ubiquitin-protein_ligase_rnf168
HVAEP1_T001612.1	OG0000224	DHX16, DHX16, DHX16, DHX16, DHX16, DHX16, DHX16, DHX16	ENSG00000227222, ENSG00000206486, ENSG00000231377, ENSG00000226171, ENSG00000233049, ENSG00000233418, ENSG00000233561, ENSG00000204560	DEAH-box helicase 16	NA	PTHR18934:SF208	OS05G0389800 PROTEIN	PF00270; PF07717; PF04408; PF00271	DEAD/DEAH box helicase; Oligonucleotide/oligosaccharide-binding (OB)-fold; Helicase associated domain (HA2); Helicase conserved C-terminal domain	DHX16_PIG;Pre-mRNA-splicing_factor_ATP-dependent_RNA_helicase_DHX16
HVAEP1_T001613.2	OG0004242	PPOX	ENSG00000143224	protoporphyrinogen oxidase	NA	PTHR42923	PROTOPORPHYRINOGEN OXIDASE	PF01593	Flavin containing amine oxidoreductase	PPOX_MOUSE;Protoporphyrinogen_oxidase
HVAEP1_T001614.2	OG0000235	CG10031	FBgn0031563	NA	NA	PTHR12352:SF3	NIDOGEN-2	PF00092; PF00086; PF00014	von Willebrand factor type A domain; Thyroglobulin type-1 repeat; Kunitz/Bovine pancreatic trypsin inhibitor domain	ATPI1_ACTTE;Actinia_tenebrosa_protease_inhibitors
HVAEP1_T001615.1	OG0005336	UVRAG	ENSG00000198382	UV radiation resistance associated	NA	PTHR15157	UV RADIATION RESISTANCE-ASSOCIATED GENE PROTEIN	PF10186	Vacuolar sorting 38 and autophagy-related subunit 14	UVRAG_MOUSE;UV_radiation_resistance-associated_protein
HVAEP1_T001617.1	OG0001644	GPATCH1	ENSG00000076650	G-patch domain containing 1	NA	PTHR13384:SF19	G PATCH DOMAIN-CONTAINING PROTEIN 1	PF07713	Protein of unknown function (DUF1604)	GPTC1_BOVIN;G_patch_domain-containing_protein_1
HVAEP1_T001618.2	OG0005494	HDDC3	ENSG00000184508	HD domain containing 3	NA	PTHR46246	GUANOSINE-3',5'-BIS(DIPHOSPHATE) 3'-PYROPHOSPHOHYDROLASE MESH1	PF13328	HD domain	MESH1_XENTR;Guanosine-3',5'-bis(diphosphate)_3'-pyrophosphohydrolase_MESH1
HVAEP1_T001619.1	NA	NA	NA	NA	NA	NA	NA	PF13639	Ring finger domain	DZIP3_HUMAN;E3_ubiquitin-protein_ligase_DZIP3
HVAEP1_T001620.1	NA	NA	NA	NA	NA	NA	NA	PF01363	FYVE zinc finger	PEP7_YEAST;Vacuolar_segregation_protein_PEP7
HVAEP1_T001624.1	NA	NA	NA	NA	NA	NA	NA	PF08385	Dynein heavy chain, N-terminal region 1	DYH2_MOUSE;Dynein_axonemal_heavy_chain_2
HVAEP1_T001634.1	NA	NA	NA	NA	NA	NA	NA	PF08385	Dynein heavy chain, N-terminal region 1	DYH1B_CHLRE;Dynein-1-beta_heavy_chain,_flagellar_inner_arm_I1_complex
HVAEP1_T001635.1	NA	NA	NA	NA	NA	NA	NA	PF08385	Dynein heavy chain, N-terminal region 1	DYH2_HUMAN;Dynein_axonemal_heavy_chain_2
HVAEP1_T001636.1	OG0000011	DNAH2	ENSG00000183914	dynein axonemal heavy chain 2	NA	PTHR45703:SF17	DYNEIN HEAVY CHAIN	PF03028; PF08393; PF12774; PF12781; PF17852; PF17857; PF12780; PF12775; PF18199; PF12777	Dynein heavy chain region D6 P-loop domain; Dynein heavy chain, N-terminal region 2; Hydrolytic ATP binding site of dynein motor region; ATP-binding dynein motor region; Dynein heavy chain AAA lid domain; AAA+ lid domain; P-loop containing dynein motor region D4; P-loop containing dynein motor region; Dynein heavy chain C-terminal domain; Microtubule-binding stalk of dynein motor	DYH2_MOUSE;Dynein_axonemal_heavy_chain_2
HVAEP1_T001638.1	NA	NA	NA	NA	NA	NA	NA	PF03184	DDE superfamily endonuclease	CLZ9_COCLU;MFS-type_transporter_clz9
HVAEP1_T001640.1	OG0003677	NDUFS2	ENSG00000158864	NADH:ubiquinone oxidoreductase core subunit S2	NA	PTHR11993	NADH-UBIQUINONE OXIDOREDUCTASE 49 KDA SUBUNIT	PF00346	Respiratory-chain NADH dehydrogenase, 49 Kd subunit	NDUS2_MOUSE;NADH_dehydrogenase_[ubiquinone]_iron-sulfur_protein_2,_mitochondrial
HVAEP1_T001641.1	OG0004364	AGFG2, AGFG1	ENSG00000106351, ENSG00000173744	ArfGAP with FG repeats 2, ArfGAP with FG repeats 1	NA	PTHR46134	DRONGO, ISOFORM F	PF01412	Putative GTPase activating protein for Arf	AGFG1_RAT;Arf-GAP_domain_and_FG_repeat-containing_protein_1
HVAEP1_T001642.1	OG0000933	ZRSR2	ENSG00000169249	zinc finger CCCH-type, RNA binding motif and serine/arginine rich 2	NA	PTHR12620:SF4	ZINC FINGER CCCH-TYPE, RNA BINDING MOTIF AND SERINE/ARGININE RICH 2	PF00642	Zinc finger C-x8-C-x5-C-x3-H type (and similar)	U2AFL_HUMAN;Putative_U2_small_nuclear_ribonucleoprotein_auxiliary_factor_35_kDa_subunit-related_protein_1
HVAEP1_T001643.1	NA	NA	NA	NA	NA	PTHR42695	GLUTAMINE AMIDOTRANSFERASE YLR126C-RELATED	PF00117	Glutamine amidotransferase class-I	GGP3_ARATH;Gamma-glutamyl_peptidase_3
HVAEP1_T001644.1	NA	NA	NA	NA	NA	PTHR10725:SF51	SI:CH211-69L10.4	NA	NA	NA
HVAEP1_T001645.1	NA	NA	NA	NA	NA	NA	NA	PF04500	FLYWCH zinc finger domain	NA
HVAEP1_T001647.1	NA	NA	NA	NA	NA	NA	NA	PF05891	AdoMet dependent proline di-methyltransferase	NA
HVAEP1_T001649.1	OG0002743	MED14	ENSG00000180182	mediator complex subunit 14	NA	PTHR12809:SF2	MEDIATOR OF RNA POLYMERASE II TRANSCRIPTION SUBUNIT 14	PF08638	Mediator complex subunit MED14	MED14_HUMAN;Mediator_of_RNA_polymerase_II_transcription_subunit_14
HVAEP1_T001650.1	OG0002658	cki-1, cki-2	WBGene00000516, WBGene00000517	Cyclin-dependent kinase inhibitor 1, CKI family (Cyclin-dependent Kinase Inhibitor)	NA	NA	NA	PF02234	Cyclin-dependent kinase inhibitor	CDN1B_CANLF;Cyclin-dependent_kinase_inhibitor_1B
HVAEP1_T001651.1	NA	NA	NA	NA	NA	PTHR46104:SF1	GENE 9195-RELATED	NA	NA	NA
HVAEP1_T001652.1	NA	NA	NA	NA	NA	PTHR46104:SF1	GENE 9195-RELATED	NA	NA	NA
HVAEP1_T001653.1	OG0005453	IAH1	ENSG00000134330	isoamyl acetate hydrolyzing esterase 1 (putative)	NA	PTHR14209:SF26	ISOAMYL ACETATE-HYDROLYZING ESTERASE 1 HOMOLOG	PF00657	GDSL-like Lipase/Acylhydrolase	IAH1_RAT;Isoamyl_acetate-hydrolyzing_esterase_1_homolog
HVAEP1_T001654.1	OG0004214	FLAD1	ENSG00000160688	flavin adenine dinucleotide synthetase 1	NA	PTHR23293:SF9	FAD SYNTHASE	PF01507; PF00994	Phosphoadenosine phosphosulfate reductase family; Probable molybdopterin binding domain	FLAD1_XENLA;FAD_synthase
HVAEP1_T001655.1	OG0000214	H3c14	ENSMUSG00000093769	H3 clustered histone 14	NA	NA	NA	PF00125	Core histone H2A/H2B/H3/H4	H32_BOVIN;Histone_H3.2
HVAEP1_T001656.1	NA	NA	NA	NA	NA	PTHR10484:SF185	HISTONE H4	PF15511	Centromere kinetochore component CENP-T histone fold	H4_ACRFO;Histone_H4
HVAEP1_T001657.1	OG0000137	H2AC1, H2AJ, H2AC20, H2AC18, H2AC19, H2AC6, H2AC14, H2AC12, H2AC7, H2AW, H2AW, H2AC4, H2AC8, H2AC11, H2AC13, H2AC15, H2AC16, H2AC17, H2AC21	ENSG00000164508, ENSG00000246705, ENSG00000184260, ENSG00000203812, ENSG00000272196, ENSG00000180573, ENSG00000276368, ENSG00000274997, ENSG00000196866, ENSG00000284841, ENSG00000181218, ENSG00000278463, ENSG00000277075, ENSG00000196787, ENSG00000196747, ENSG00000275221, ENSG00000276903, ENSG00000278677, ENSG00000184270	H2A.W histone, H2A clustered histone 1, H2A clustered histone 4, H2A clustered histone 15, H2A clustered histone 16, H2A clustered histone 17, H2A clustered histone 6, H2A clustered histone 7, H2A clustered histone 8, H2A clustered histone 14, H2A clustered histone 13, H2A clustered histone 11, H2A clustered histone 12, H2A.J histone, H2A clustered histone 20, H2A clustered histone 21	NA	PTHR23430:SF303	HISTONE H2AX	PF16211; PF00125	C-terminus of histone H2A; Core histone H2A/H2B/H3/H4	H2A_SEPOF;Histone_H2A
HVAEP1_T001658.1	NA	NA	NA	NA	NA	NA	NA	NA	NA	H4_AGABI;Histone_H4
HVAEP1_T001659.1	NA	NA	NA	NA	NA	PTHR23430:SF303	HISTONE H2AX	PF16211	C-terminus of histone H2A	H2A_SEPOF;Histone_H2A
HVAEP1_T001660.1	OG0000344	H1-0	ENSG00000189060	H1.0 linker histone	NA	PTHR11467:SF102	HISTONE H1.0	PF00538	linker histone H1 and H5 family	H10A_XENLA;Histone_H1.0-A
HVAEP1_T001661.1	NA	NA	NA	NA	NA	PTHR10484:SF185	HISTONE H4	PF15511	Centromere kinetochore component CENP-T histone fold	H4_ACRFO;Histone_H4
HVAEP1_T001662.1	NA	NA	NA	NA	NA	PTHR23430:SF303	HISTONE H2AX	PF16211	C-terminus of histone H2A	H2A_SEPOF;Histone_H2A
HVAEP1_T001663.1	OG0000344	H1-0	ENSG00000189060	H1.0 linker histone	NA	PTHR11467:SF102	HISTONE H1.0	PF00538	linker histone H1 and H5 family	H10A_XENLA;Histone_H1.0-A
HVAEP1_T001664.1	OG0000214	H3c14	ENSMUSG00000093769	H3 clustered histone 14	NA	NA	NA	PF00125	Core histone H2A/H2B/H3/H4	H32_BOVIN;Histone_H3.2
HVAEP1_T001665.1	NA	NA	NA	NA	NA	PTHR10484:SF185	HISTONE H4	PF15511	Centromere kinetochore component CENP-T histone fold	H4_ACRFO;Histone_H4
HVAEP1_T001666.1	NA	NA	NA	NA	NA	PTHR23430:SF303	HISTONE H2AX	PF16211	C-terminus of histone H2A	H2A_SEPOF;Histone_H2A
HVAEP1_T001667.1	OG0000344	H1-0	ENSG00000189060	H1.0 linker histone	NA	PTHR11467:SF102	HISTONE H1.0	PF00538	linker histone H1 and H5 family	H10A_XENLA;Histone_H1.0-A
HVAEP1_T001668.1	OG0000214	H3c14	ENSMUSG00000093769	H3 clustered histone 14	NA	NA	NA	PF00125	Core histone H2A/H2B/H3/H4	H32_BOVIN;Histone_H3.2
HVAEP1_T001669.1	OG0000137	H2AC1, H2AJ, H2AC20, H2AC18, H2AC19, H2AC6, H2AC14, H2AC12, H2AC7, H2AW, H2AW, H2AC4, H2AC8, H2AC11, H2AC13, H2AC15, H2AC16, H2AC17, H2AC21	ENSG00000164508, ENSG00000246705, ENSG00000184260, ENSG00000203812, ENSG00000272196, ENSG00000180573, ENSG00000276368, ENSG00000274997, ENSG00000196866, ENSG00000284841, ENSG00000181218, ENSG00000278463, ENSG00000277075, ENSG00000196787, ENSG00000196747, ENSG00000275221, ENSG00000276903, ENSG00000278677, ENSG00000184270	H2A.W histone, H2A clustered histone 1, H2A clustered histone 4, H2A clustered histone 15, H2A clustered histone 16, H2A clustered histone 17, H2A clustered histone 6, H2A clustered histone 7, H2A clustered histone 8, H2A clustered histone 14, H2A clustered histone 13, H2A clustered histone 11, H2A clustered histone 12, H2A.J histone, H2A clustered histone 20, H2A clustered histone 21	NA	PTHR23430:SF303	HISTONE H2AX	PF16211; PF00125	C-terminus of histone H2A; Core histone H2A/H2B/H3/H4	H2A_SEPOF;Histone_H2A
HVAEP1_T001670.1	OG0001445	GYG1, GYG2	ENSG00000163754, ENSG00000056998	glycogenin 2, glycogenin 1	NA	PTHR11183:SF100	GLYCOGENIN-2	PF01501	Glycosyl transferase family 8	GLYG_MOUSE;Glycogenin-1
HVAEP1_T001671.1	OG0000292	grm3	ENSXETG00000036687	DNZDHHC/NEW1 zinc finger protein 11	NA	PTHR22883:SF246	PALMITOYLTRANSFERASE ZDHHC3	PF01529	DHHC palmitoyltransferase	ZDHC3_HUMAN;Palmitoyltransferase_ZDHHC3
HVAEP1_T001678.1	OG0006471	LSM11	ENSG00000155858	LSM11, U7 small nuclear RNA associated	NA	PTHR21415	U7 SNRNA-ASSOCIATED SM-LIKE PROTEIN LSM11	NA	NA	LSM11_HUMAN;U7_snRNA-associated_Sm-like_protein_LSm11
HVAEP1_T001679.2	OG0005208	PABIR2, PABIR3, PABIR1	ENSG00000156504, ENSG00000156500, ENSG00000187866	PP2A Aalpha (PPP2R1A) and B55A (PPP2R2A) interacting phosphatase regulator 1, PABIR family member 3, PABIR family member 2	NA	PTHR22227	UNCHARACTERIZED	NA	NA	PBIR1_HUMAN;PPP2R1A-PPP2R2A-interacting_phosphatase_regulator_1
HVAEP1_T001680.1	OG0005713	CWC15	ENSG00000150316	CWC15 spliceosome associated protein homolog	NA	PTHR12718:SF2	SPLICEOSOME-ASSOCIATED PROTEIN CWC15 HOMOLOG	PF04889	Cwf15/Cwc15 cell cycle control protein	CW15A_XENLA;Protein_CWC15_homolog_A
HVAEP1_T001681.1	OG0000344	H1-0	ENSG00000189060	H1.0 linker histone	NA	PTHR11467:SF102	HISTONE H1.0	PF00538	linker histone H1 and H5 family	H5_CAIMO;Histone_H5
HVAEP1_T001682.1	OG0000137	H2AC1, H2AJ, H2AC20, H2AC18, H2AC19, H2AC6, H2AC14, H2AC12, H2AC7, H2AW, H2AW, H2AC4, H2AC8, H2AC11, H2AC13, H2AC15, H2AC16, H2AC17, H2AC21	ENSG00000164508, ENSG00000246705, ENSG00000184260, ENSG00000203812, ENSG00000272196, ENSG00000180573, ENSG00000276368, ENSG00000274997, ENSG00000196866, ENSG00000284841, ENSG00000181218, ENSG00000278463, ENSG00000277075, ENSG00000196787, ENSG00000196747, ENSG00000275221, ENSG00000276903, ENSG00000278677, ENSG00000184270	H2A.W histone, H2A clustered histone 1, H2A clustered histone 4, H2A clustered histone 15, H2A clustered histone 16, H2A clustered histone 17, H2A clustered histone 6, H2A clustered histone 7, H2A clustered histone 8, H2A clustered histone 14, H2A clustered histone 13, H2A clustered histone 11, H2A clustered histone 12, H2A.J histone, H2A clustered histone 20, H2A clustered histone 21	KY053286.1; strain Ind-Pune histone H2A.1	PTHR23430:SF303	HISTONE H2AX	PF16211; PF00125	C-terminus of histone H2A; Core histone H2A/H2B/H3/H4	H2A_SEPOF;Histone_H2A
HVAEP1_T001683.1	OG0000344	H1-0	ENSG00000189060	H1.0 linker histone	NA	PTHR11467:SF102	HISTONE H1.0	PF00538	linker histone H1 and H5 family	H10A_XENLA;Histone_H1.0-A
HVAEP1_T001684.1	OG0000214	H3c14	ENSMUSG00000093769	H3 clustered histone 14	NA	NA	NA	PF00125	Core histone H2A/H2B/H3/H4	H32_BOVIN;Histone_H3.2
HVAEP1_T001685.1	NA	NA	NA	NA	NA	PTHR10484:SF185	HISTONE H4	PF15511	Centromere kinetochore component CENP-T histone fold	H4_ACRFO;Histone_H4
HVAEP1_T001686.1	OG0000137	H2AC1, H2AJ, H2AC20, H2AC18, H2AC19, H2AC6, H2AC14, H2AC12, H2AC7, H2AW, H2AW, H2AC4, H2AC8, H2AC11, H2AC13, H2AC15, H2AC16, H2AC17, H2AC21	ENSG00000164508, ENSG00000246705, ENSG00000184260, ENSG00000203812, ENSG00000272196, ENSG00000180573, ENSG00000276368, ENSG00000274997, ENSG00000196866, ENSG00000284841, ENSG00000181218, ENSG00000278463, ENSG00000277075, ENSG00000196787, ENSG00000196747, ENSG00000275221, ENSG00000276903, ENSG00000278677, ENSG00000184270	H2A.W histone, H2A clustered histone 1, H2A clustered histone 4, H2A clustered histone 15, H2A clustered histone 16, H2A clustered histone 17, H2A clustered histone 6, H2A clustered histone 7, H2A clustered histone 8, H2A clustered histone 14, H2A clustered histone 13, H2A clustered histone 11, H2A clustered histone 12, H2A.J histone, H2A clustered histone 20, H2A clustered histone 21	NA	PTHR23430:SF303	HISTONE H2AX	PF16211	C-terminus of histone H2A	H2A_ASTRU;Histone_H2A
HVAEP1_T001687.1	OG0000344	H1-0	ENSG00000189060	H1.0 linker histone	NA	PTHR11467:SF102	HISTONE H1.0	PF00538	linker histone H1 and H5 family	H5_CAIMO;Histone_H5
HVAEP1_T001688.1	OG0000214	H3c14	ENSMUSG00000093769	H3 clustered histone 14	NA	NA	NA	PF00125	Core histone H2A/H2B/H3/H4	H32_BOVIN;Histone_H3.2
HVAEP1_T001689.1	OG0000137	H2AC1, H2AJ, H2AC20, H2AC18, H2AC19, H2AC6, H2AC14, H2AC12, H2AC7, H2AW, H2AW, H2AC4, H2AC8, H2AC11, H2AC13, H2AC15, H2AC16, H2AC17, H2AC21	ENSG00000164508, ENSG00000246705, ENSG00000184260, ENSG00000203812, ENSG00000272196, ENSG00000180573, ENSG00000276368, ENSG00000274997, ENSG00000196866, ENSG00000284841, ENSG00000181218, ENSG00000278463, ENSG00000277075, ENSG00000196787, ENSG00000196747, ENSG00000275221, ENSG00000276903, ENSG00000278677, ENSG00000184270	H2A.W histone, H2A clustered histone 1, H2A clustered histone 4, H2A clustered histone 15, H2A clustered histone 16, H2A clustered histone 17, H2A clustered histone 6, H2A clustered histone 7, H2A clustered histone 8, H2A clustered histone 14, H2A clustered histone 13, H2A clustered histone 11, H2A clustered histone 12, H2A.J histone, H2A clustered histone 20, H2A clustered histone 21	NA	PTHR23430:SF303	HISTONE H2AX	PF16211; PF00125	C-terminus of histone H2A; Core histone H2A/H2B/H3/H4	H2A_SEPOF;Histone_H2A
HVAEP1_T001690.1	OG0000344	H1-0	ENSG00000189060	H1.0 linker histone	NA	PTHR11467:SF102	HISTONE H1.0	PF00538	linker histone H1 and H5 family	H5_CAIMO;Histone_H5
HVAEP1_T001691.1	NA	NA	NA	NA	NA	PTHR10484:SF185	HISTONE H4	NA	NA	H4_ACRFO;Histone_H4
HVAEP1_T001692.1	OG0000234	H2BC3, H2BU1, H2BU1, H2BC14, H2BC21, H2BC12, H2BS1, H2BC4, H2BC6, H2BC7, H2BC8, H2BC10, H2BC5, H2BC15, H2BC13, H2BC11, H2BC17, H2BC9, H2BC18, H2BC1	ENSG00000276410, ENSG00000285449, ENSG00000196890, ENSG00000273703, ENSG00000184678, ENSG00000197903, ENSG00000234289, ENSG00000180596, ENSG00000274290, ENSG00000277224, ENSG00000273802, ENSG00000278588, ENSG00000158373, ENSG00000233822, ENSG00000185130, ENSG00000124635, ENSG00000274641, ENSG00000275713, ENSG00000203814, ENSG00000146047	H2B.S histone 1, H2B.U histone 1, H2B clustered histone 1, H2B clustered histone 11, H2B clustered histone 3, H2B clustered histone 6, H2B clustered histone 17, H2B clustered histone 10, H2B clustered histone 14, H2B clustered histone 8, H2B clustered histone 13, H2B clustered histone 15, H2B clustered histone 7, H2B clustered histone 9, H2B clustered histone 4, H2B clustered histone 5, H2B clust…	NA	PTHR23428:SF125	HISTONE H2B 3-RELATED	PF00125	Core histone H2A/H2B/H3/H4	H2B1_TIGCA;Histone_H2B.1/H2B.2
HVAEP1_T001693.1	OG0000137	H2AC1, H2AJ, H2AC20, H2AC18, H2AC19, H2AC6, H2AC14, H2AC12, H2AC7, H2AW, H2AW, H2AC4, H2AC8, H2AC11, H2AC13, H2AC15, H2AC16, H2AC17, H2AC21	ENSG00000164508, ENSG00000246705, ENSG00000184260, ENSG00000203812, ENSG00000272196, ENSG00000180573, ENSG00000276368, ENSG00000274997, ENSG00000196866, ENSG00000284841, ENSG00000181218, ENSG00000278463, ENSG00000277075, ENSG00000196787, ENSG00000196747, ENSG00000275221, ENSG00000276903, ENSG00000278677, ENSG00000184270	H2A.W histone, H2A clustered histone 1, H2A clustered histone 4, H2A clustered histone 15, H2A clustered histone 16, H2A clustered histone 17, H2A clustered histone 6, H2A clustered histone 7, H2A clustered histone 8, H2A clustered histone 14, H2A clustered histone 13, H2A clustered histone 11, H2A clustered histone 12, H2A.J histone, H2A clustered histone 20, H2A clustered histone 21	NA	PTHR23430:SF303	HISTONE H2AX	PF16211; PF00125	C-terminus of histone H2A; Core histone H2A/H2B/H3/H4	H2A_SEPOF;Histone_H2A
HVAEP1_T001694.1	OG0000344	H1-0	ENSG00000189060	H1.0 linker histone	NA	PTHR11467:SF102	HISTONE H1.0	PF00538	linker histone H1 and H5 family	H5_CAIMO;Histone_H5
HVAEP1_T001695.1	NA	NA	NA	NA	LN868239.1; Hemicentin 2-like 1 (HMCN2L1 gene), strain Jussy	PTHR45080:SF13	WRAPPER/REGA-1/KLINGON HOMOLOG	PF13927; PF07679	Immunoglobulin domain; Immunoglobulin I-set domain	HMCN1_MOUSE;Hemicentin-1
HVAEP1_T001696.1	OG0000007	ZMYM1	ENSG00000197056	zinc finger MYM-type containing 1	NA	NA	NA	NA	NA	NA
HVAEP1_T001698.1	OG0001623	C25H3.11	WBGene00016120	hypothetical protein	NA	PTHR16166:SF93	VACUOLAR PROTEIN SORTING-ASSOCIATED PROTEIN 13D	PF16910; PF12624; PF16908; PF06650; PF00627; PF16909	Repeating coiled region of VPS13; N-terminal region of Chorein or VPS13; Vacuolar sorting-associated protein 13, N-terminal; SHR-binding domain of vacuolar-sorting associated protein 13; UBA/TS-N domain; Vacuolar-sorting-associated 13 protein C-terminal	VP13D_HUMAN;Vacuolar_protein_sorting-associated_protein_13D
HVAEP1_T001699.2	NA	NA	NA	NA	NA	NA	NA	PF00531	Death domain	NA
HVAEP1_T001701.1	OG0000128	CASP8, CASP10	ENSG00000064012, ENSG00000003400	caspase 10, caspase 8	NA	PTHR10454:SF209	CASPASE-18/A	PF00531; PF00656	Death domain; Caspase domain	CASP8_MOUSE;Caspase-8
HVAEP1_T001702.2	NA	NA	NA	NA	NA	PTHR47241	FINGER PROTEIN, PUTATIVE-RELATED	NA	NA	TRA1_MAIZE;Putative_AC_transposase
HVAEP1_T001703.1	NA	NA	NA	NA	NA	NA	NA	PF00078	Reverse transcriptase (RNA-dependent DNA polymerase)	RTBS_DROME;Probable_RNA-directed_DNA_polymerase_from_transposon_BS
HVAEP1_T001704.1	OG0000026	CG14478	FBgn0028953	NA	NA	NA	NA	PF01498	Transposase	NA
HVAEP1_T001705.1	OG0000081	SIK2	ENSG00000170145	salt inducible kinase 2	NA	PTHR24346:SF38	SALT INDUCIBLE KINASE 2	PF00069	Protein kinase domain	SIK2_MOUSE;Serine/threonine-protein_kinase_SIK2
HVAEP1_T001707.1	OG0002097	NDUFA2	ENSG00000131495	NADH:ubiquinone oxidoreductase subunit A2	NA	PTHR12878	NADH-UBIQUINONE OXIDOREDUCTASE B8 SUBUNIT	PF05047	Mitochondrial ribosomal protein L51 / S25 / CI-B8 domain	NDUA2_BOVIN;NADH_dehydrogenase_[ubiquinone]_1_alpha_subcomplex_subunit_2
HVAEP1_T001708.1	OG0002294	TMEM145	ENSG00000167619	transmembrane protein 145	NA	PTHR23252:SF24	TRANSMEMBRANE PROTEIN 145	PF10192	Rhodopsin-like GPCR transmembrane domain	TM145_XENLA;Transmembrane_protein_145
HVAEP1_T001709.1	OG0004977	TMEM177	ENSG00000144120	transmembrane protein 177	NA	PTHR21824:SF4	TRANSMEMBRANE PROTEIN 177	PF01435	Peptidase family M48	TM177_DANRE;Transmembrane_protein_177
HVAEP1_T001710.1	OG0004977	TMEM177	ENSG00000144120	transmembrane protein 177	NA	NA	NA	PF01435	Peptidase family M48	TM177_DANRE;Transmembrane_protein_177
HVAEP1_T001711.1	OG0003451	U2SURP	ENSG00000163714	U2 snRNP associated SURP domain containing	NA	PTHR23140:SF0	U2 SNRNP-ASSOCIATED SURP MOTIF-CONTAINING PROTEIN	PF08312; PF04818; PF00076; PF01805	cwf21 domain; CID domain; RNA recognition motif. (a.k.a. RRM, RBD, or RNP domain); Surp module	SR140_HUMAN;U2_snRNP-associated_SURP_motif-containing_protein
HVAEP1_T001712.1	OG0005263	NUFIP1	ENSG00000083635	nuclear FMR1 interacting protein 1	NA	PTHR13309	NUCLEAR FRAGILE X MENTAL RETARDATION PROTEIN INTERACTING PROTEIN 1	PF10453	Nuclear fragile X mental retardation-interacting protein 1 (NUFIP1)	NUFP1_HUMAN;Nuclear_fragile_X_mental_retardation-interacting_protein_1
HVAEP1_T001714.1	OG0000828	Nhe3	FBgn0028703	NA	NA	PTHR10110:SF61	SODIUM/HYDROGEN EXCHANGER 9	PF00999	Sodium/hydrogen exchanger family	SL9A9_HUMAN;Sodium/hydrogen_exchanger_9
HVAEP1_T001718.2	OG0002153	Fpps	FBgn0025373	NA	NA	PTHR11525:SF0	FARNESYL PYROPHOSPHATE SYNTHASE	PF00348	Polyprenyl synthetase	FPPS_BOVIN;Farnesyl_pyrophosphate_synthase
HVAEP1_T001720.1	NA	NA	NA	NA	NA	PTHR10131:SF138	TNF RECEPTOR ASSOCIATED FACTOR (TRAF) HOMOLOG	PF02176	TRAF-type zinc finger	TRAF4_HUMAN;TNF_receptor-associated_factor_4
HVAEP1_T001722.1	OG0003055	NOG	ENSG00000183691	noggin	EU314928.1; strain Ind-Pune hynog	PTHR10494	BONE MORPHOGENETIC PROTEIN INHIBITOR, NOGGIN	PF05806	Noggin	NOGG1_DANRE;Noggin-1
HVAEP1_T001725.1	OG0004239	WRAP53	ENSG00000141499	WD repeat containing antisense to TP53	NA	PTHR13211	UNCHARACTERIZED	PF00400	WD domain, G-beta repeat	TCAB1_MOUSE;Telomerase_Cajal_body_protein_1
HVAEP1_T001726.1	OG0000137	H2AC1, H2AJ, H2AC20, H2AC18, H2AC19, H2AC6, H2AC14, H2AC12, H2AC7, H2AW, H2AW, H2AC4, H2AC8, H2AC11, H2AC13, H2AC15, H2AC16, H2AC17, H2AC21	ENSG00000164508, ENSG00000246705, ENSG00000184260, ENSG00000203812, ENSG00000272196, ENSG00000180573, ENSG00000276368, ENSG00000274997, ENSG00000196866, ENSG00000284841, ENSG00000181218, ENSG00000278463, ENSG00000277075, ENSG00000196787, ENSG00000196747, ENSG00000275221, ENSG00000276903, ENSG00000278677, ENSG00000184270	H2A.W histone, H2A clustered histone 1, H2A clustered histone 4, H2A clustered histone 15, H2A clustered histone 16, H2A clustered histone 17, H2A clustered histone 6, H2A clustered histone 7, H2A clustered histone 8, H2A clustered histone 14, H2A clustered histone 13, H2A clustered histone 11, H2A clustered histone 12, H2A.J histone, H2A clustered histone 20, H2A clustered histone 21	NA	PTHR23430:SF303	HISTONE H2AX	PF16211; PF00125	C-terminus of histone H2A; Core histone H2A/H2B/H3/H4	H2A1_PSAMI;Late_histone_H2A.1
HVAEP1_T001727.1	OG0000344	H1-0	ENSG00000189060	H1.0 linker histone	NA	PTHR11467:SF102	HISTONE H1.0	PF00538	linker histone H1 and H5 family	H5_CAIMO;Histone_H5
HVAEP1_T001728.1	NA	NA	NA	NA	NA	PTHR43625:SF4	ALDO-KETO REDUCTASE FAMILY 7, MEMBER A3 (AFLATOXIN ALDEHYDE REDUCTASE)	PF00248	Aldo/keto reductase family	ARK72_MOUSE;Aflatoxin_B1_aldehyde_reductase_member_2
HVAEP1_T001729.1	OG0003030	INPP5D, INPP5D, INPPL1	ENSG00000281614, ENSG00000168918, ENSG00000165458	inositol polyphosphate-5-phosphatase D, inositol polyphosphate phosphatase like 1	NA	NA	NA	PF03372; PF00536; PF00017	Endonuclease/Exonuclease/phosphatase family; SAM domain (Sterile alpha motif); SH2 domain	SHP2A_DANRE;Phosphatidylinositol_3,4,5-trisphosphate_5-phosphatase_2A
HVAEP1_T001730.1	NA	NA	NA	NA	NA	PTHR10484:SF186	HISTONE H4	NA	NA	H4_ACRFO;Histone_H4
HVAEP1_T001731.1	OG0001336	ULK1, ULK2	ENSG00000177169, ENSG00000083290	unc-51 like autophagy activating kinase 2, unc-51 like autophagy activating kinase 1	NA	PTHR24348:SF18	SERINE/THREONINE-PROTEIN KINASE ULK2	PF00069	Protein kinase domain	ULK2_HUMAN;Serine/threonine-protein_kinase_ULK2
HVAEP1_T001732.1	NA	NA	NA	NA	NA	PTHR22796:SF6	SI:DKEY-217F16.1-RELATED	PF00041	Fibronectin type III domain	GVIN1_MOUSE;Interferon-induced_very_large_GTPase_1
HVAEP1_T001735.1	OG0006563	AP5Z1	ENSG00000242802	adaptor related protein complex 5 subunit zeta 1	NA	PTHR46488	AP-5 COMPLEX SUBUNIT ZETA-1	PF14764	AP-5 complex subunit, vesicle trafficking	AP5Z1_HUMAN;AP-5_complex_subunit_zeta-1
HVAEP1_T001736.1	OG0005435	AGPS	ENSG00000018510	alkylglycerone phosphate synthase	NA	PTHR46568	ALKYLDIHYDROXYACETONEPHOSPHATE SYNTHASE, PEROXISOMAL	PF01565; PF02913	FAD binding domain; FAD linked oxidases, C-terminal domain	ADAS_HUMAN;Alkyldihydroxyacetonephosphate_synthase,_peroxisomal
HVAEP1_T001737.1	NA	NA	NA	NA	NA	PTHR11360:SF251	KARMOISIN, ISOFORM B	PF07690	Major Facilitator Superfamily	MOT10_HUMAN;Monocarboxylate_transporter_10
HVAEP1_T001738.1	NA	NA	NA	NA	NA	PTHR10773:SF12	DNA-DIRECTED RNA POLYMERASES I, II, AND III SUBUNIT RPABC2	NA	NA	NA
HVAEP1_T001739.1	OG0001336	ULK3	ENSG00000140474	unc-51 like kinase 3	NA	PTHR24348:SF22	SERINE/THREONINE-PROTEIN KINASE ULK3	PF00069; PF04212	Protein kinase domain; MIT (microtubule interacting and transport) domain	ULK3_XENLA;Serine/threonine-protein_kinase_ULK3
HVAEP1_T001744.1	OG0002849	NHLRC2	ENSG00000196865	NHL repeat containing 2	NA	PTHR46388	NHL REPEAT-CONTAINING PROTEIN 2	NA	NA	NHLC2_MOUSE;NHL_repeat-containing_protein_2
HVAEP1_T001745.1	OG0002849	NHLRC2	ENSG00000196865	NHL repeat containing 2	NA	PTHR46388	NHL REPEAT-CONTAINING PROTEIN 2	PF01436	NHL repeat	NHLC2_CHICK;NHL_repeat-containing_protein_2
HVAEP1_T001746.1	NA	NA	NA	NA	MK376926.1; innexin 10 (INX10)	PTHR11893	INNEXIN	PF00876	Innexin	NA
HVAEP1_T001747.1	OG0005283	THOC6	ENSG00000131652	THO complex 6	NA	PTHR44411	THO COMPLEX SUBUNIT 6 HOMOLOG	PF00400	WD domain, G-beta repeat	THOC6_DANRE;THO_complex_subunit_6_homolog
HVAEP1_T001748.1	OG0005943	JKAMP	ENSG00000050130	JNK1/MAPK8 associated membrane protein	NA	PTHR12740	JNK1/MAPK8-ASSOCIATED MEMBRANE PROTEIN	PF05571	JNK1/MAPK8-associated membrane protein	JKAMP_HUMAN;JNK1/MAPK8-associated_membrane_protein
HVAEP1_T001749.2	NA	NA	NA	NA	NA	NA	NA	PF00076	RNA recognition motif. (a.k.a. RRM, RBD, or RNP domain)	ROA1_DROME;Heterogeneous_nuclear_ribonucleoprotein_A1
HVAEP1_T001751.1	NA	NA	NA	NA	NA	PTHR22891:SF59	PROTEIN ARGONAUTE-2	PF02170; PF16487; PF16486; PF02171; PF08699; PF16488	PAZ domain; Mid domain of argonaute; N-terminal domain of argonaute; Piwi domain; Argonaute linker 1 domain; Argonaute linker 2 domain	AGO2_HUMAN;Protein_argonaute-2
HVAEP1_T001752.1	NA	NA	NA	NA	NA	PTHR22891:SF59	PROTEIN ARGONAUTE-2	PF02171	Piwi domain	AGO2_RABIT;Protein_argonaute-2_(Fragment)
HVAEP1_T001756.1	NA	NA	NA	NA	NA	PTHR22891:SF17	PROTEIN ARGONAUTE-1	PF02171; PF16487; PF16488	Piwi domain; Mid domain of argonaute; Argonaute linker 2 domain	AGO1_HUMAN;Protein_argonaute-1
HVAEP1_T001757.2	NA	NA	NA	NA	NA	PTHR22891:SF59	PROTEIN ARGONAUTE-2	PF08699; PF16486	Argonaute linker 1 domain; N-terminal domain of argonaute	AGO2_HUMAN;Protein_argonaute-2
HVAEP1_T001758.1	OG0004183	TXNDC16	ENSG00000087301	thioredoxin domain containing 16	NA	PTHR22699	THIOREDOXIN DOMAIN-CONTAINING PROTEIN 16	PF13848; PF00085	Thioredoxin-like domain; Thioredoxin	TXD16_HUMAN;Thioredoxin_domain-containing_protein_16
HVAEP1_T001759.1	OG0004183	TXNDC16	ENSG00000087301	thioredoxin domain containing 16	NA	NA	NA	NA	NA	NA
HVAEP1_T001760.1	OG0000137	H2AC1, H2AJ, H2AC20, H2AC18, H2AC19, H2AC6, H2AC14, H2AC12, H2AC7, H2AW, H2AW, H2AC4, H2AC8, H2AC11, H2AC13, H2AC15, H2AC16, H2AC17, H2AC21	ENSG00000164508, ENSG00000246705, ENSG00000184260, ENSG00000203812, ENSG00000272196, ENSG00000180573, ENSG00000276368, ENSG00000274997, ENSG00000196866, ENSG00000284841, ENSG00000181218, ENSG00000278463, ENSG00000277075, ENSG00000196787, ENSG00000196747, ENSG00000275221, ENSG00000276903, ENSG00000278677, ENSG00000184270	H2A.W histone, H2A clustered histone 1, H2A clustered histone 4, H2A clustered histone 15, H2A clustered histone 16, H2A clustered histone 17, H2A clustered histone 6, H2A clustered histone 7, H2A clustered histone 8, H2A clustered histone 14, H2A clustered histone 13, H2A clustered histone 11, H2A clustered histone 12, H2A.J histone, H2A clustered histone 20, H2A clustered histone 21	NA	PTHR23430:SF303	HISTONE H2AX	PF16211; PF00125	C-terminus of histone H2A; Core histone H2A/H2B/H3/H4	H2A_SEPOF;Histone_H2A
HVAEP1_T001761.1	NA	NA	NA	NA	NA	PTHR10484:SF185	HISTONE H4	PF15511	Centromere kinetochore component CENP-T histone fold	H4_ACRFO;Histone_H4
HVAEP1_T001762.1	OG0000214	H3c14	ENSMUSG00000093769	H3 clustered histone 14	NA	NA	NA	PF00125	Core histone H2A/H2B/H3/H4	H32_BOVIN;Histone_H3.2
HVAEP1_T001763.1	OG0000344	H1-0	ENSG00000189060	H1.0 linker histone	NA	PTHR11467:SF102	HISTONE H1.0	PF00538	linker histone H1 and H5 family	H5_CAIMO;Histone_H5
HVAEP1_T001764.1	OG0000137	H2AC1, H2AJ, H2AC20, H2AC18, H2AC19, H2AC6, H2AC14, H2AC12, H2AC7, H2AW, H2AW, H2AC4, H2AC8, H2AC11, H2AC13, H2AC15, H2AC16, H2AC17, H2AC21	ENSG00000164508, ENSG00000246705, ENSG00000184260, ENSG00000203812, ENSG00000272196, ENSG00000180573, ENSG00000276368, ENSG00000274997, ENSG00000196866, ENSG00000284841, ENSG00000181218, ENSG00000278463, ENSG00000277075, ENSG00000196787, ENSG00000196747, ENSG00000275221, ENSG00000276903, ENSG00000278677, ENSG00000184270	H2A.W histone, H2A clustered histone 1, H2A clustered histone 4, H2A clustered histone 15, H2A clustered histone 16, H2A clustered histone 17, H2A clustered histone 6, H2A clustered histone 7, H2A clustered histone 8, H2A clustered histone 14, H2A clustered histone 13, H2A clustered histone 11, H2A clustered histone 12, H2A.J histone, H2A clustered histone 20, H2A clustered histone 21	NA	PTHR23430:SF303	HISTONE H2AX	PF16211; PF00125	C-terminus of histone H2A; Core histone H2A/H2B/H3/H4	H2A_SEPOF;Histone_H2A
HVAEP1_T001765.1	NA	NA	NA	NA	NA	PTHR10484:SF185	HISTONE H4	PF15511	Centromere kinetochore component CENP-T histone fold	H4_ACRFO;Histone_H4
HVAEP1_T001766.1	OG0000214	H3c14	ENSMUSG00000093769	H3 clustered histone 14	NA	NA	NA	PF00125	Core histone H2A/H2B/H3/H4	H32_BOVIN;Histone_H3.2
HVAEP1_T001767.1	OG0000344	H1-0	ENSG00000189060	H1.0 linker histone	NA	PTHR11467:SF102	HISTONE H1.0	PF00538	linker histone H1 and H5 family	H5_CAIMO;Histone_H5
HVAEP1_T001768.1	OG0000137	H2AC1, H2AJ, H2AC20, H2AC18, H2AC19, H2AC6, H2AC14, H2AC12, H2AC7, H2AW, H2AW, H2AC4, H2AC8, H2AC11, H2AC13, H2AC15, H2AC16, H2AC17, H2AC21	ENSG00000164508, ENSG00000246705, ENSG00000184260, ENSG00000203812, ENSG00000272196, ENSG00000180573, ENSG00000276368, ENSG00000274997, ENSG00000196866, ENSG00000284841, ENSG00000181218, ENSG00000278463, ENSG00000277075, ENSG00000196787, ENSG00000196747, ENSG00000275221, ENSG00000276903, ENSG00000278677, ENSG00000184270	H2A.W histone, H2A clustered histone 1, H2A clustered histone 4, H2A clustered histone 15, H2A clustered histone 16, H2A clustered histone 17, H2A clustered histone 6, H2A clustered histone 7, H2A clustered histone 8, H2A clustered histone 14, H2A clustered histone 13, H2A clustered histone 11, H2A clustered histone 12, H2A.J histone, H2A clustered histone 20, H2A clustered histone 21	NA	PTHR23430:SF303	HISTONE H2AX	PF16211; PF00125	C-terminus of histone H2A; Core histone H2A/H2B/H3/H4	H2A_SEPOF;Histone_H2A
HVAEP1_T001769.1	NA	NA	NA	NA	NA	PTHR10484:SF185	HISTONE H4	PF15511	Centromere kinetochore component CENP-T histone fold	H4_ACRFO;Histone_H4
HVAEP1_T001770.1	OG0000214	H3c14	ENSMUSG00000093769	H3 clustered histone 14	NA	NA	NA	PF00125	Core histone H2A/H2B/H3/H4	H32_BOVIN;Histone_H3.2
HVAEP1_T001771.1	OG0000344	H1-0	ENSG00000189060	H1.0 linker histone	NA	PTHR11467:SF102	HISTONE H1.0	PF00538	linker histone H1 and H5 family	H5_CAIMO;Histone_H5
HVAEP1_T001772.1	OG0000137	H2AC1, H2AJ, H2AC20, H2AC18, H2AC19, H2AC6, H2AC14, H2AC12, H2AC7, H2AW, H2AW, H2AC4, H2AC8, H2AC11, H2AC13, H2AC15, H2AC16, H2AC17, H2AC21	ENSG00000164508, ENSG00000246705, ENSG00000184260, ENSG00000203812, ENSG00000272196, ENSG00000180573, ENSG00000276368, ENSG00000274997, ENSG00000196866, ENSG00000284841, ENSG00000181218, ENSG00000278463, ENSG00000277075, ENSG00000196787, ENSG00000196747, ENSG00000275221, ENSG00000276903, ENSG00000278677, ENSG00000184270	H2A.W histone, H2A clustered histone 1, H2A clustered histone 4, H2A clustered histone 15, H2A clustered histone 16, H2A clustered histone 17, H2A clustered histone 6, H2A clustered histone 7, H2A clustered histone 8, H2A clustered histone 14, H2A clustered histone 13, H2A clustered histone 11, H2A clustered histone 12, H2A.J histone, H2A clustered histone 20, H2A clustered histone 21	NA	PTHR23430:SF303	HISTONE H2AX	PF16211; PF00125	C-terminus of histone H2A; Core histone H2A/H2B/H3/H4	H2A_SEPOF;Histone_H2A
HVAEP1_T001773.1	OG0000214	H3c14	ENSMUSG00000093769	H3 clustered histone 14	NA	NA	NA	PF00125	Core histone H2A/H2B/H3/H4	H32_BOVIN;Histone_H3.2
HVAEP1_T001774.1	OG0000344	H1-0	ENSG00000189060	H1.0 linker histone	NA	PTHR11467:SF102	HISTONE H1.0	PF00538	linker histone H1 and H5 family	H5_CAIMO;Histone_H5
HVAEP1_T001775.1	OG0000137	H2AC1, H2AJ, H2AC20, H2AC18, H2AC19, H2AC6, H2AC14, H2AC12, H2AC7, H2AW, H2AW, H2AC4, H2AC8, H2AC11, H2AC13, H2AC15, H2AC16, H2AC17, H2AC21	ENSG00000164508, ENSG00000246705, ENSG00000184260, ENSG00000203812, ENSG00000272196, ENSG00000180573, ENSG00000276368, ENSG00000274997, ENSG00000196866, ENSG00000284841, ENSG00000181218, ENSG00000278463, ENSG00000277075, ENSG00000196787, ENSG00000196747, ENSG00000275221, ENSG00000276903, ENSG00000278677, ENSG00000184270	H2A.W histone, H2A clustered histone 1, H2A clustered histone 4, H2A clustered histone 15, H2A clustered histone 16, H2A clustered histone 17, H2A clustered histone 6, H2A clustered histone 7, H2A clustered histone 8, H2A clustered histone 14, H2A clustered histone 13, H2A clustered histone 11, H2A clustered histone 12, H2A.J histone, H2A clustered histone 20, H2A clustered histone 21	NA	PTHR23430:SF303	HISTONE H2AX	PF16211; PF00125	C-terminus of histone H2A; Core histone H2A/H2B/H3/H4	H2A_SEPOF;Histone_H2A
HVAEP1_T001776.1	OG0000214	H3c14	ENSMUSG00000093769	H3 clustered histone 14	NA	NA	NA	PF00125	Core histone H2A/H2B/H3/H4	H32_BOVIN;Histone_H3.2
HVAEP1_T001777.1	OG0000344	H1-0	ENSG00000189060	H1.0 linker histone	NA	NA	NA	PF00538	linker histone H1 and H5 family	NA
HVAEP1_T001778.1	OG0000137	H2AC1, H2AJ, H2AC20, H2AC18, H2AC19, H2AC6, H2AC14, H2AC12, H2AC7, H2AW, H2AW, H2AC4, H2AC8, H2AC11, H2AC13, H2AC15, H2AC16, H2AC17, H2AC21	ENSG00000164508, ENSG00000246705, ENSG00000184260, ENSG00000203812, ENSG00000272196, ENSG00000180573, ENSG00000276368, ENSG00000274997, ENSG00000196866, ENSG00000284841, ENSG00000181218, ENSG00000278463, ENSG00000277075, ENSG00000196787, ENSG00000196747, ENSG00000275221, ENSG00000276903, ENSG00000278677, ENSG00000184270	H2A.W histone, H2A clustered histone 1, H2A clustered histone 4, H2A clustered histone 15, H2A clustered histone 16, H2A clustered histone 17, H2A clustered histone 6, H2A clustered histone 7, H2A clustered histone 8, H2A clustered histone 14, H2A clustered histone 13, H2A clustered histone 11, H2A clustered histone 12, H2A.J histone, H2A clustered histone 20, H2A clustered histone 21	NA	PTHR23430:SF72	HISTONE H2A TYPE 2-B	PF00125; PF16211	Core histone H2A/H2B/H3/H4; C-terminus of histone H2A	H2AO_CHITH;Histone_H2A,_orphon
HVAEP1_T001779.1	NA	NA	NA	NA	NA	PTHR10484:SF185	HISTONE H4	NA	NA	H4_BLAAD;Histone_H4
HVAEP1_T001780.1	OG0000214	H3c14	ENSMUSG00000093769	H3 clustered histone 14	NA	NA	NA	PF00125	Core histone H2A/H2B/H3/H4	H32_ARATH;Histone_H3.2
HVAEP1_T001782.1	OG0006134	TMCO3	ENSG00000150403	transmembrane and coiled-coil domains 3	NA	PTHR16254:SF14	TRANSMEMBRANE AND COILED-COIL DOMAIN-CONTAINING PROTEIN 3	PF00999	Sodium/hydrogen exchanger family	TMCO3_MOUSE;Transmembrane_and_coiled-coil_domain-containing_protein_3
HVAEP1_T001783.1	OG0005882	RABAC1	ENSG00000105404	Rab acceptor 1	NA	PTHR19317:SF0	PRENYLATED RAB ACCEPTOR PROTEIN 1	PF03208	PRA1 family protein	PRAF1_HUMAN;Prenylated_Rab_acceptor_protein_1
HVAEP1_T001785.1	OG0003587	MINDY1, MINDY2	ENSG00000143409, ENSG00000128923	MINDY lysine 48 deubiquitinase 2, MINDY lysine 48 deubiquitinase 1	NA	PTHR18063:SF7	UBIQUITIN CARBOXYL-TERMINAL HYDROLASE MINDY-1	PF04424	MINDY deubiquitinase	MINY2_BOVIN;Ubiquitin_carboxyl-terminal_hydrolase_MINDY-2
HVAEP1_T001788.1	OG0003658	WASHC2C, WASHC2A	ENSG00000172661, ENSG00000099290	WASH complex subunit 2A, WASH complex subunit 2C	NA	PTHR21669:SF1	WASH COMPLEX SUBUNIT 2A-RELATED	NA	NA	WAC2C_HUMAN;WASH_complex_subunit_2C
HVAEP1_T001789.1	OG0011404	lag-2	WBGene00002246	Protein lag-2	NA	NA	NA	PF00008	EGF-like domain	DNER_HUMAN;Delta_and_Notch-like_epidermal_growth_factor-related_receptor
HVAEP1_T001791.1	NA	NA	NA	NA	NA	PTHR45749:SF11	AC-LIKE TRANSPOSASE-RELATED	PF14291	Domain of unknown function (DUF4371)	NA
HVAEP1_T001794.1	OG0004391	ARCN1	ENSG00000095139	archain 1	NA	PTHR10121	COATOMER SUBUNIT DELTA	PF00928; PF01217	Adaptor complexes medium subunit family; Clathrin adaptor complex small chain	COPD_CHICK;Coatomer_subunit_delta
HVAEP1_T001795.1	OG0005230	RRP1B, RRP1	ENSG00000160208, ENSG00000160214	ribosomal RNA processing 1B, ribosomal RNA processing 1	NA	PTHR13026:SF0	RIBOSOMAL RNA-PROCESSING 1	PF05997	Nucleolar protein,Nop52	RRP1_MOUSE;Ribosomal_RNA_processing_protein_1_homolog_A
HVAEP1_T001796.2	NA	NA	NA	NA	NA	NA	NA	PF08279	HTH domain	NA
HVAEP1_T001797.1	NA	NA	NA	NA	NA	NA	NA	PF13894; PF00096	C2H2-type zinc finger; Zinc finger, C2H2 type	MAZ_MESAU;Myc-associated_zinc_finger_protein_(Fragment)
HVAEP1_T001798.1	OG0000165	ABCG4, ABCG1	ENSG00000172350, ENSG00000160179	ATP binding cassette subfamily G member 1, ATP binding cassette subfamily G member 4	NA	PTHR48041:SF78	ABC TRANSPORTER EXPRESSED IN TRACHEA, ISOFORM A-RELATED	PF00005; PF01061	ABC transporter; ABC-2 type transporter	ABCG4_HUMAN;ATP-binding_cassette_sub-family_G_member_4
HVAEP1_T001799.1	NA	NA	NA	NA	NA	PTHR46182	FI19480P1	NA	NA	NA
HVAEP1_T001800.1	NA	NA	NA	NA	NA	PTHR10773:SF12	DNA-DIRECTED RNA POLYMERASES I, II, AND III SUBUNIT RPABC2	NA	NA	NA
HVAEP1_T001801.2	OG0006903	GPR180	ENSG00000152749	G protein-coupled receptor 180	NA	PTHR23252:SF29	INTEGRAL MEMBRANE PROTEIN GPR180	PF10192	Rhodopsin-like GPCR transmembrane domain	GP180_XENLA;Integral_membrane_protein_GPR180
HVAEP1_T001802.1	NA	NA	NA	NA	NA	PTHR11920:SF488	GUANYLATE CYCLASE	PF01094; PF00211; PF00069	Receptor family ligand binding region; Adenylate and Guanylate cyclase catalytic domain; Protein kinase domain	ANPRA_HUMAN;Atrial_natriuretic_peptide_receptor_1
HVAEP1_T001806.1	OG0000260	SLC25A14, SLC25A30	ENSG00000102078, ENSG00000174032	solute carrier family 25 member 30, solute carrier family 25 member 14	NA	PTHR45618:SF48	MITOCHONDRIAL UNCOUPLING PROTEIN BMCP	PF00153	Mitochondrial carrier protein	KMCP1_MOUSE;Kidney_mitochondrial_carrier_protein_1
HVAEP1_T001807.1	OG0001276	GLUL	ENSG00000135821	glutamate-ammonia ligase	NA	PTHR20852:SF57	GLUTAMINE SYNTHETASE 2 CYTOPLASMIC	PF00120; PF03951	Glutamine synthetase, catalytic domain; Glutamine synthetase, beta-Grasp domain	GLNA_PANAR;Glutamine_synthetase
HVAEP1_T001808.1	OG0001276	GLUL	ENSG00000135821	glutamate-ammonia ligase	NA	PTHR20852:SF57	GLUTAMINE SYNTHETASE 2 CYTOPLASMIC	PF00120; PF03951	Glutamine synthetase, catalytic domain; Glutamine synthetase, beta-Grasp domain	GLNA_PANAR;Glutamine_synthetase
HVAEP1_T001809.1	OG0000183	CCNB3	ENSG00000147082	cyclin B3	NA	PTHR10177:SF214	G2/MITOTIC-SPECIFIC CYCLIN-B3	PF00134; PF02984	Cyclin, N-terminal domain; Cyclin, C-terminal domain	CCNB3_CHICK;G2/mitotic-specific_cyclin-B3
HVAEP1_T001810.1	OG0001276	GLUL	ENSG00000135821	glutamate-ammonia ligase	NA	PTHR20852:SF57	GLUTAMINE SYNTHETASE 2 CYTOPLASMIC	PF00120; PF03951	Glutamine synthetase, catalytic domain; Glutamine synthetase, beta-Grasp domain	GLNA_MOUSE;Glutamine_synthetase
HVAEP1_T001811.1	OG0005150	SELENOT	ENSG00000198843	selenoprotein T	NA	PTHR13544:SF0	THIOREDOXIN REDUCTASE-LIKE SELENOPROTEIN T	PF10262	Rdx family	SELT_XENTR;Thioredoxin_reductase-like_selenoprotein_T
HVAEP1_T001812.1	OG0000079	RAP2B, RAP2A, RAP2C	ENSG00000181467, ENSG00000125249, ENSG00000123728	RAP2A, member of RAS oncogene family, RAP2C, member of RAS oncogene family, RAP2B, member of RAS oncogene family	NA	PTHR24070:SF419	RAP2A, MEMBER OF RAS ONCOGENE FAMILY A	PF00071	Ras family	RAP2A_PIG;Ras-related_protein_Rap-2a
HVAEP1_T001813.2	NA	NA	NA	NA	NA	PTHR48012:SF9	SERINE/THREONINE-PROTEIN KINASE 25	PF00069	Protein kinase domain	STK25_MOUSE;Serine/threonine-protein_kinase_25
HVAEP1_T001814.1	OG0002089	CFAP91	ENSG00000183833	cilia and flagella associated protein 91	NA	PTHR22455	UNCHARACTERIZED	PF14738	Cilia- and flagella-associated protein 91	CFA91_HUMAN;Cilia-_and_flagella-associated_protein_91
HVAEP1_T001818.1	NA	NA	NA	NA	NA	PTHR10454:SF210	CASPASE-RELATED	PF00656	Caspase domain	CASP3_SAIBB;Caspase-3
HVAEP1_T001819.1	OG0006486	PSMC3IP	ENSG00000131470	PSMC3 interacting protein	NA	PTHR15938	TBP-1 INTERACTING PROTEIN	PF18517; PF07106	Leucine zipper with capping helix domain; TBPIP/Hop2 winged helix domain	HOP2_MOUSE;Homologous-pairing_protein_2_homolog
HVAEP1_T001820.2	OG0001058	RGSL1	ENSG00000121446	regulator of G protein signaling like 1	NA	PTHR47079	REGULATOR OF G-PROTEIN SIGNALING PROTEIN-LIKE	PF00615	Regulator of G protein signaling domain	RGSL_HUMAN;Regulator_of_G-protein_signaling_protein-like
HVAEP1_T001821.1	OG0003542	WDFY2, WDFY1	ENSG00000139668, ENSG00000085449	WD repeat and FYVE domain containing 2, WD repeat and FYVE domain containing 1	NA	PTHR46189	LD41958P	PF01363; PF00400	FYVE zinc finger; WD domain, G-beta repeat	WDFY2_HUMAN;WD_repeat_and_FYVE_domain-containing_protein_2
HVAEP1_T001822.1	NA	NA	NA	NA	NA	PTHR23055:SF178	RECOVERIN FAMILY PROTEIN DDB_G0274781	PF13833; PF00569; PF13405	EF-hand domain pair; Zinc finger, ZZ type; EF-hand domain	MIB_DROME;E3_ubiquitin-protein_ligase_mind-bomb
HVAEP1_T001823.1	OG0007241	TMEM101	ENSG00000091947	transmembrane protein 101	NA	PTHR31034	TRANSMEMBRANE PROTEIN 101	PF15111	TMEM101 protein family	TM101_MOUSE;Transmembrane_protein_101
HVAEP1_T001825.1	OG0000215	CG10431	FBgn0032730	NA	NA	PTHR10725:SF33	THAP DOMAIN CONTAINING 2	PF12017; PF05485	Transposase protein; THAP domain	THAP9_HUMAN;DNA_transposase_THAP9
HVAEP1_T001826.1	OG0002194	CG3308	FBgn0038877	NA	NA	PTHR10060:SF20	FI03671P	PF00076; PF01026	RNA recognition motif. (a.k.a. RRM, RBD, or RNP domain); TatD related DNase	TATD_ERWBE;3'-5'_ssDNA/RNA_exonuclease_TatD
HVAEP1_T001827.1	NA	NA	NA	NA	NA	NA	NA	PF01522	Polysaccharide deacetylase	CDA7_BOMMO;Chitin_deacetylase_7
HVAEP1_T001828.1	NA	NA	NA	NA	NA	NA	NA	NA	NA	CDA8_BOMMO;Chitin_deacetylase_8
HVAEP1_T001830.1	NA	NA	NA	NA	NA	PTHR36299	AGAP008005-PA	PF15998	Domain of unknown function (DUF4773)	NA
HVAEP1_T001831.1	OG0001996	LRCH2, LRCH1, LRCH4, LRCH3	ENSG00000130224, ENSG00000136141, ENSG00000077454, ENSG00000186001	leucine rich repeats and calponin homology domain containing 1, leucine rich repeats and calponin homology domain containing 2, leucine rich repeats and calponin homology domain containing 4, leucine rich repeats and calponin homology domain containing 3	NA	PTHR45752:SF80	LEUCINE-RICH-REPEATS AND CALPONIN HOMOLOGY DOMAIN PROTEIN, ISOFORM B	PF13855; PF00307	Leucine rich repeat; Calponin homology (CH) domain	LRCH1_HUMAN;Leucine-rich_repeat_and_calponin_homology_domain-containing_protein_1
HVAEP1_T001833.1	OG0000214	igf3	ENSXETG00000039567		NA	NA	NA	PF00125	Core histone H2A/H2B/H3/H4	H33_PONAB;Histone_H3.3
HVAEP1_T001834.1	NA	NA	NA	NA	NA	PTHR10484:SF185	HISTONE H4	PF15511	Centromere kinetochore component CENP-T histone fold	H4_ACRFO;Histone_H4
HVAEP1_T001835.1	OG0000137	H2AC1, H2AJ, H2AC20, H2AC18, H2AC19, H2AC6, H2AC14, H2AC12, H2AC7, H2AW, H2AW, H2AC4, H2AC8, H2AC11, H2AC13, H2AC15, H2AC16, H2AC17, H2AC21	ENSG00000164508, ENSG00000246705, ENSG00000184260, ENSG00000203812, ENSG00000272196, ENSG00000180573, ENSG00000276368, ENSG00000274997, ENSG00000196866, ENSG00000284841, ENSG00000181218, ENSG00000278463, ENSG00000277075, ENSG00000196787, ENSG00000196747, ENSG00000275221, ENSG00000276903, ENSG00000278677, ENSG00000184270	H2A.W histone, H2A clustered histone 1, H2A clustered histone 4, H2A clustered histone 15, H2A clustered histone 16, H2A clustered histone 17, H2A clustered histone 6, H2A clustered histone 7, H2A clustered histone 8, H2A clustered histone 14, H2A clustered histone 13, H2A clustered histone 11, H2A clustered histone 12, H2A.J histone, H2A clustered histone 20, H2A clustered histone 21	NA	PTHR23430:SF303	HISTONE H2AX	PF16211; PF00125	C-terminus of histone H2A; Core histone H2A/H2B/H3/H4	H2A_SEPOF;Histone_H2A
HVAEP1_T001836.1	OG0000344	H1-0	ENSG00000189060	H1.0 linker histone	NA	PTHR11467:SF102	HISTONE H1.0	PF00538	linker histone H1 and H5 family	H5_CAIMO;Histone_H5
HVAEP1_T001837.1	OG0002804	FMR1, FXR2, FXR1	ENSG00000102081, ENSG00000129245, ENSG00000114416	FMRP translational regulator 1, FMR1 autosomal homolog 2, FMR1 autosomal homolog 1	NA	PTHR10603	FRAGILE X MENTAL RETARDATION SYNDROME-RELATED PROTEIN	PF05641; PF17904; PF00013	Agenet domain; FMRP KH0 domain; KH domain	FXR1A_XENLA;Fragile_X_mental_retardation_syndrome-related_protein_1_homolog_A
HVAEP1_T001843.1	NA	NA	NA	NA	NA	NA	NA	NA	NA	ING5_HUMAN;Inhibitor_of_growth_protein_5
HVAEP1_T001845.2	NA	NA	NA	NA	NA	NA	NA	PF05225	helix-turn-helix, Psq domain	NA
HVAEP1_T001848.1	NA	NA	NA	NA	NA	NA	NA	PF00536	SAM domain (Sterile alpha motif)	NA
HVAEP1_T001849.1	NA	NA	NA	NA	NA	PTHR46791	EXPRESSED PROTEIN	NA	NA	NA
HVAEP1_T001854.1	NA	NA	NA	NA	NA	NA	NA	NA	NA	PELET_DROME;Transposable_element_P_transposase
HVAEP1_T001855.1	NA	NA	NA	NA	NA	PTHR43939:SF1	STRUCTURAL MAINTENANCE OF CHROMOSOMES PROTEIN 4	PF02463	RecF/RecN/SMC N terminal domain	SMC4_ARATH;Structural_maintenance_of_chromosomes_protein_4
HVAEP1_T001856.1	NA	NA	NA	NA	NA	PTHR43939:SF1	STRUCTURAL MAINTENANCE OF CHROMOSOMES PROTEIN 4	PF06470	SMC proteins Flexible Hinge Domain	SMC4_MOUSE;Structural_maintenance_of_chromosomes_protein_4
HVAEP1_T001857.1	NA	NA	NA	NA	NA	NA	NA	NA	NA	ZMYM1_HUMAN;Zinc_finger_MYM-type_protein_1
HVAEP1_T001858.2	OG0006919	CFAP126	ENSG00000188931	cilia and flagella associated protein 126	NA	PTHR34639	PROTEIN FLATTOP	NA	NA	FLTOP_NEMVE;Protein_Flattop_homolog
HVAEP1_T001860.1	OG0001799	STAG3, STAG2, STAG1	ENSG00000066923, ENSG00000101972, ENSG00000118007	stromal antigen 2, stromal antigen 3, stromal antigen 1	NA	PTHR11199	STROMAL ANTIGEN	PF08514	STAG domain	STAG1_HUMAN;Cohesin_subunit_SA-1
HVAEP1_T001861.1	OG0000344	H1-0	ENSG00000189060	H1.0 linker histone	NA	PTHR11467:SF102	HISTONE H1.0	PF00538	linker histone H1 and H5 family	H10A_XENLA;Histone_H1.0-A
HVAEP1_T001862.1	NA	NA	NA	NA	NA	NA	NA	PF00125	Core histone H2A/H2B/H3/H4	H33_HORVU;Histone_H3.3_(Fragment)
HVAEP1_T001863.1	NA	NA	NA	NA	NA	NA	NA	NA	NA	H4_ACRFO;Histone_H4
HVAEP1_T001864.1	OG0000137	H2AC1, H2AJ, H2AC20, H2AC18, H2AC19, H2AC6, H2AC14, H2AC12, H2AC7, H2AW, H2AW, H2AC4, H2AC8, H2AC11, H2AC13, H2AC15, H2AC16, H2AC17, H2AC21	ENSG00000164508, ENSG00000246705, ENSG00000184260, ENSG00000203812, ENSG00000272196, ENSG00000180573, ENSG00000276368, ENSG00000274997, ENSG00000196866, ENSG00000284841, ENSG00000181218, ENSG00000278463, ENSG00000277075, ENSG00000196787, ENSG00000196747, ENSG00000275221, ENSG00000276903, ENSG00000278677, ENSG00000184270	H2A.W histone, H2A clustered histone 1, H2A clustered histone 4, H2A clustered histone 15, H2A clustered histone 16, H2A clustered histone 17, H2A clustered histone 6, H2A clustered histone 7, H2A clustered histone 8, H2A clustered histone 14, H2A clustered histone 13, H2A clustered histone 11, H2A clustered histone 12, H2A.J histone, H2A clustered histone 20, H2A clustered histone 21	NA	PTHR23430:SF303	HISTONE H2AX	PF16211; PF00125	C-terminus of histone H2A; Core histone H2A/H2B/H3/H4	H2A_SEPOF;Histone_H2A
HVAEP1_T001865.2	OG0000344	H1-0	ENSG00000189060	H1.0 linker histone	NA	PTHR11467:SF102	HISTONE H1.0	PF00538	linker histone H1 and H5 family	H10A_XENLA;Histone_H1.0-A
HVAEP1_T001866.1	OG0000214	H3c14	ENSMUSG00000093769	H3 clustered histone 14	NA	NA	NA	PF00125	Core histone H2A/H2B/H3/H4	H32_BOVIN;Histone_H3.2
HVAEP1_T001867.1	NA	NA	NA	NA	NA	PTHR10484:SF185	HISTONE H4	PF15511	Centromere kinetochore component CENP-T histone fold	H4_ACRFO;Histone_H4
HVAEP1_T001868.1	OG0000137	H2AC1, H2AJ, H2AC20, H2AC18, H2AC19, H2AC6, H2AC14, H2AC12, H2AC7, H2AW, H2AW, H2AC4, H2AC8, H2AC11, H2AC13, H2AC15, H2AC16, H2AC17, H2AC21	ENSG00000164508, ENSG00000246705, ENSG00000184260, ENSG00000203812, ENSG00000272196, ENSG00000180573, ENSG00000276368, ENSG00000274997, ENSG00000196866, ENSG00000284841, ENSG00000181218, ENSG00000278463, ENSG00000277075, ENSG00000196787, ENSG00000196747, ENSG00000275221, ENSG00000276903, ENSG00000278677, ENSG00000184270	H2A.W histone, H2A clustered histone 1, H2A clustered histone 4, H2A clustered histone 15, H2A clustered histone 16, H2A clustered histone 17, H2A clustered histone 6, H2A clustered histone 7, H2A clustered histone 8, H2A clustered histone 14, H2A clustered histone 13, H2A clustered histone 11, H2A clustered histone 12, H2A.J histone, H2A clustered histone 20, H2A clustered histone 21	NA	PTHR23430:SF303	HISTONE H2AX	PF16211; PF00125	C-terminus of histone H2A; Core histone H2A/H2B/H3/H4	H2A_SEPOF;Histone_H2A
HVAEP1_T001869.1	OG0000344	H1-0	ENSG00000189060	H1.0 linker histone	NA	PTHR11467:SF102	HISTONE H1.0	PF00538	linker histone H1 and H5 family	H10A_XENLA;Histone_H1.0-A
HVAEP1_T001870.1	OG0000137	H2AC1, H2AJ, H2AC20, H2AC18, H2AC19, H2AC6, H2AC14, H2AC12, H2AC7, H2AW, H2AW, H2AC4, H2AC8, H2AC11, H2AC13, H2AC15, H2AC16, H2AC17, H2AC21	ENSG00000164508, ENSG00000246705, ENSG00000184260, ENSG00000203812, ENSG00000272196, ENSG00000180573, ENSG00000276368, ENSG00000274997, ENSG00000196866, ENSG00000284841, ENSG00000181218, ENSG00000278463, ENSG00000277075, ENSG00000196787, ENSG00000196747, ENSG00000275221, ENSG00000276903, ENSG00000278677, ENSG00000184270	H2A.W histone, H2A clustered histone 1, H2A clustered histone 4, H2A clustered histone 15, H2A clustered histone 16, H2A clustered histone 17, H2A clustered histone 6, H2A clustered histone 7, H2A clustered histone 8, H2A clustered histone 14, H2A clustered histone 13, H2A clustered histone 11, H2A clustered histone 12, H2A.J histone, H2A clustered histone 20, H2A clustered histone 21	NA	PTHR23430:SF303	HISTONE H2AX	PF00125	Core histone H2A/H2B/H3/H4	H2A_PLADU;Histone_H2A
HVAEP1_T001871.1	OG0005338	SF3B6	ENSG00000115128	splicing factor 3b subunit 6	NA	PTHR12785:SF7	SPLICING FACTOR 3B SUBUNIT 6	PF00076	RNA recognition motif. (a.k.a. RRM, RBD, or RNP domain)	SF3B6_HUMAN;Splicing_factor_3B_subunit_6
HVAEP1_T001872.1	OG0004734	EIF2A	ENSG00000144895	eukaryotic translation initiation factor 2A	NA	PTHR13227	EUKARYOTIC TRANSLATION INITIATION FACTOR 2A	PF08662	Eukaryotic translation initiation factor eIF2A	EIF2A_MOUSE;Eukaryotic_translation_initiation_factor_2A
HVAEP1_T001873.1	OG0000565	PIK3CD, PIK3CB	ENSG00000171608, ENSG00000051382	phosphatidylinositol-4,5-bisphosphate 3-kinase catalytic subunit delta, phosphatidylinositol-4,5-bisphosphate 3-kinase catalytic subunit beta	NA	PTHR10048:SF108	PHOSPHATIDYLINOSITOL 3-KINASE CATALYTIC SUBUNIT TYPE 3	PF02192; PF00794; PF00792; PF00454; PF00613	PI3-kinase family, p85-binding domain; PI3-kinase family, ras-binding domain; Phosphoinositide 3-kinase C2; Phosphatidylinositol 3- and 4-kinase; Phosphoinositide 3-kinase family, accessory domain (PIK domain)	PK3CB_MOUSE;Phosphatidylinositol_4,5-bisphosphate_3-kinase_catalytic_subunit_beta_isoform
HVAEP1_T001876.1	NA	NA	NA	NA	NA	NA	NA	PF02902; PF00628	Ulp1 protease family, C-terminal catalytic domain; PHD-finger	NA
HVAEP1_T001878.1	OG0005204	ASCC1	ENSG00000138303	activating signal cointegrator 1 complex subunit 1	NA	PTHR13360	ACTIVATING SIGNAL COINTEGRATOR 1 COMPLEX SUBUNIT 1	PF00013; PF10469	KH domain; AKAP7 2'5' RNA ligase-like domain	ASCC1_MOUSE;Activating_signal_cointegrator_1_complex_subunit_1
HVAEP1_T001879.1	OG0001246	CG31224	FBgn0051224	NA	NA	PTHR24393:SF87	FI17950P1	PF00096	Zinc finger, C2H2 type	NA
HVAEP1_T001880.1	NA	NA	NA	NA	NA	PTHR23055:SF57	NEURON-SPECIFIC CALCIUM-BINDING PROTEIN HIPPOCALCIN	PF00036; PF13499	EF hand; EF-hand domain pair	NCAH_DROME;Neurocalcin_homolog
HVAEP1_T001881.1	NA	NA	NA	NA	NA	PTHR24393:SF87	FI17950P1	PF00096; PF04814; PF13465	Zinc finger, C2H2 type; Hepatocyte nuclear factor 1 (HNF-1), N terminus; Zinc-finger double domain	NA
HVAEP1_T001882.1	OG0003239	MFSD1	ENSG00000118855	major facilitator superfamily domain containing 1	NA	NA	NA	PF07690	Major Facilitator Superfamily	MFSD1_DANRE;Major_facilitator_superfamily_domain-containing_protein_1
HVAEP1_T001883.1	OG0001218	ATP1B1, ATP1B3, ATP1B2, ATP4B, ATP4B, ATP1B4	ENSG00000143153, ENSG00000069849, ENSG00000129244, ENSG00000288359, ENSG00000186009, ENSG00000101892	ATPase H+/K+ transporting subunit beta, ATPase Na+/K+ transporting family member beta 4, ATPase Na+/K+ transporting subunit beta 2, ATPase Na+/K+ transporting subunit beta 3, ATPase Na+/K+ transporting subunit beta 1	NA	PTHR11523	SODIUM/POTASSIUM-DEPENDENT ATPASE BETA SUBUNIT	PF00287	Sodium / potassium ATPase beta chain	AT1B1_CHICK;Sodium/potassium-transporting_ATPase_subunit_beta-1
HVAEP1_T001885.1	OG0001913	CFAP44	ENSG00000206530	cilia and flagella associated protein 44	NA	PTHR14885:SF2	CILIA AND FLAGELLA ASSOCIATED PROTEIN 44	PF00400	WD domain, G-beta repeat	CFA44_MOUSE;Cilia-_and_flagella-associated_protein_44
HVAEP1_T001886.1	OG0000362	EIF4A1, EIF4A2	ENSG00000161960, ENSG00000156976	eukaryotic translation initiation factor 4A1, eukaryotic translation initiation factor 4A2	NA	PTHR24031:SF720	EUKARYOTIC INITIATION FACTOR 4A-II	PF00270; PF00271	DEAD/DEAH box helicase; Helicase conserved C-terminal domain	IF4A2_BOVIN;Eukaryotic_initiation_factor_4A-II
HVAEP1_T001887.1	NA	NA	NA	NA	NA	NA	NA	PF02037	SAP domain	NA
HVAEP1_T001889.1	OG0007703	LAMTOR4	ENSG00000188186	late endosomal/lysosomal adaptor, MAPK and MTOR activator 4	NA	PTHR33967	RAGULATOR COMPLEX PROTEIN LAMTOR4	NA	NA	LTOR4_NEMVE;Ragulator_complex_protein_LAMTOR4_homolog
HVAEP1_T001891.1	OG0005519	LRRC58	ENSG00000163428	leucine rich repeat containing 58	NA	PTHR45752:SF13	LEUCINE-RICH REPEAT-CONTAINING PROTEIN 58	PF13855	Leucine rich repeat	LRC58_MOUSE;Leucine-rich_repeat-containing_protein_58
HVAEP1_T001893.1	OG0004463	TMEM129	ENSG00000168936	transmembrane protein 129, E3 ubiquitin ligase	NA	PTHR31322	E3 UBIQUITIN-PROTEIN LIGASE TM129	PF10272	Putative transmembrane protein precursor	TM129_CHICK;Transmembrane_protein_129
HVAEP1_T001894.2	OG0004463	TMEM129	ENSG00000168936	transmembrane protein 129, E3 ubiquitin ligase	NA	NA	NA	PF00010	Helix-loop-helix DNA-binding domain	NA
HVAEP1_T001895.1	OG0005344	ATPAF2	ENSG00000171953	ATP synthase mitochondrial F1 complex assembly factor 2	NA	PTHR21013	ATP SYNTHASE MITOCHONDRIAL F1 COMPLEX ASSEMBLY FACTOR 2/ATP12 PROTEIN, MITOCHONDRIAL PRECURSOR	PF07542	ATP12 chaperone protein	ATPF2_BOVIN;ATP_synthase_mitochondrial_F1_complex_assembly_factor_2
HVAEP1_T001896.1	OG0007484	UBAC2	ENSG00000134882	UBA domain containing 2	NA	NA	NA	PF00627	UBA/TS-N domain	UBAC2_MOUSE;Ubiquitin-associated_domain-containing_protein_2
HVAEP1_T001908.1	NA	NA	NA	NA	NA	NA	NA	PF13966	zinc-binding in reverse transcriptase	NA
HVAEP1_T001909.2	OG0000321	rpl22l1, txlna, tmprss11f, cpm, camlg, ncln, med9	ENSXETG00000035493, ENSXETG00000037891, ENSXETG00000040087, ENSXETG00000040612, ENSXETG00000038173, ENSXETG00000038007, ENSXETG00000035613		NA	NA	NA	PF00078	Reverse transcriptase (RNA-dependent DNA polymerase)	LIN1_NYCCO;LINE-1_reverse_transcriptase_homolog
HVAEP1_T001929.1	OG0002220	GFM1	ENSG00000168827	G elongation factor mitochondrial 1	NA	PTHR43636	ELONGATION FACTOR G, MITOCHONDRIAL	PF00679; PF00009; PF03144; PF03764; PF14492	Elongation factor G C-terminus; Elongation factor Tu GTP binding domain; Elongation factor Tu domain 2; Elongation factor G, domain IV; Elongation Factor G, domain III	EFGM_NEMVE;Elongation_factor_G,_mitochondrial
HVAEP1_T001930.2	OG0000939	DIXDC1	ENSG00000150764	DIX domain containing 1	NA	PTHR10878:SF22	DIXIN	PF00778; PF00307	DIX domain; Calponin homology (CH) domain	DIXC1_HUMAN;Dixin
HVAEP1_T001931.1	OG0001593	YAP1, WWTR1	ENSG00000137693, ENSG00000018408	Yes1 associated transcriptional regulator, WW domain containing transcription regulator 1	KM065534.1; trans-spliced leader sequence D	PTHR17616	YES-ASSOCIATED PROTEIN YAP1 FAMILY MEMBER	PF00397	WW domain	YAP1_CHICK;Transcriptional_coactivator_YAP1
HVAEP1_T001932.1	OG0000344	H1-0	ENSG00000189060	H1.0 linker histone	NA	PTHR11467:SF102	HISTONE H1.0	PF00538	linker histone H1 and H5 family	H10A_XENLA;Histone_H1.0-A
HVAEP1_T001933.1	OG0000137	H2AC1, H2AJ, H2AC20, H2AC18, H2AC19, H2AC6, H2AC14, H2AC12, H2AC7, H2AW, H2AW, H2AC4, H2AC8, H2AC11, H2AC13, H2AC15, H2AC16, H2AC17, H2AC21	ENSG00000164508, ENSG00000246705, ENSG00000184260, ENSG00000203812, ENSG00000272196, ENSG00000180573, ENSG00000276368, ENSG00000274997, ENSG00000196866, ENSG00000284841, ENSG00000181218, ENSG00000278463, ENSG00000277075, ENSG00000196787, ENSG00000196747, ENSG00000275221, ENSG00000276903, ENSG00000278677, ENSG00000184270	H2A.W histone, H2A clustered histone 1, H2A clustered histone 4, H2A clustered histone 15, H2A clustered histone 16, H2A clustered histone 17, H2A clustered histone 6, H2A clustered histone 7, H2A clustered histone 8, H2A clustered histone 14, H2A clustered histone 13, H2A clustered histone 11, H2A clustered histone 12, H2A.J histone, H2A clustered histone 20, H2A clustered histone 21	NA	PTHR23430:SF303	HISTONE H2AX	PF16211; PF00125	C-terminus of histone H2A; Core histone H2A/H2B/H3/H4	H2A_SEPOF;Histone_H2A
HVAEP1_T001934.1	OG0000344	H1-0	ENSG00000189060	H1.0 linker histone	NA	PTHR11467:SF102	HISTONE H1.0	PF00538	linker histone H1 and H5 family	H10A_XENLA;Histone_H1.0-A
HVAEP1_T001935.1	OG0000137	H2AC1, H2AJ, H2AC20, H2AC18, H2AC19, H2AC6, H2AC14, H2AC12, H2AC7, H2AW, H2AW, H2AC4, H2AC8, H2AC11, H2AC13, H2AC15, H2AC16, H2AC17, H2AC21	ENSG00000164508, ENSG00000246705, ENSG00000184260, ENSG00000203812, ENSG00000272196, ENSG00000180573, ENSG00000276368, ENSG00000274997, ENSG00000196866, ENSG00000284841, ENSG00000181218, ENSG00000278463, ENSG00000277075, ENSG00000196787, ENSG00000196747, ENSG00000275221, ENSG00000276903, ENSG00000278677, ENSG00000184270	H2A.W histone, H2A clustered histone 1, H2A clustered histone 4, H2A clustered histone 15, H2A clustered histone 16, H2A clustered histone 17, H2A clustered histone 6, H2A clustered histone 7, H2A clustered histone 8, H2A clustered histone 14, H2A clustered histone 13, H2A clustered histone 11, H2A clustered histone 12, H2A.J histone, H2A clustered histone 20, H2A clustered histone 21	NA	PTHR23430:SF303	HISTONE H2AX	PF16211; PF00125	C-terminus of histone H2A; Core histone H2A/H2B/H3/H4	H2A_SEPOF;Histone_H2A
HVAEP1_T001936.1	OG0000234	H2BC3, H2BU1, H2BU1, H2BC14, H2BC21, H2BC12, H2BS1, H2BC4, H2BC6, H2BC7, H2BC8, H2BC10, H2BC5, H2BC15, H2BC13, H2BC11, H2BC17, H2BC9, H2BC18, H2BC1	ENSG00000276410, ENSG00000285449, ENSG00000196890, ENSG00000273703, ENSG00000184678, ENSG00000197903, ENSG00000234289, ENSG00000180596, ENSG00000274290, ENSG00000277224, ENSG00000273802, ENSG00000278588, ENSG00000158373, ENSG00000233822, ENSG00000185130, ENSG00000124635, ENSG00000274641, ENSG00000275713, ENSG00000203814, ENSG00000146047	H2B.S histone 1, H2B.U histone 1, H2B clustered histone 1, H2B clustered histone 11, H2B clustered histone 3, H2B clustered histone 6, H2B clustered histone 17, H2B clustered histone 10, H2B clustered histone 14, H2B clustered histone 8, H2B clustered histone 13, H2B clustered histone 15, H2B clustered histone 7, H2B clustered histone 9, H2B clustered histone 4, H2B clustered histone 5, H2B clust…	KY053291.1; strain Ind-Pune histone H2B.1	NA	NA	PF00125	Core histone H2A/H2B/H3/H4	H2B3_TIGCA;Histone_H2B.3
HVAEP1_T001937.1	OG0000344	H1-0	ENSG00000189060	H1.0 linker histone	NA	PTHR11467:SF102	HISTONE H1.0	PF00538	linker histone H1 and H5 family	H10_XENTR;Histone_H1.0
HVAEP1_T001938.1	NA	NA	NA	NA	NA	PTHR23430:SF303	HISTONE H2AX	NA	NA	H2A_ASTRU;Histone_H2A
HVAEP1_T001939.1	OG0000344	H1-0	ENSG00000189060	H1.0 linker histone	NA	PTHR11467:SF102	HISTONE H1.0	PF00538	linker histone H1 and H5 family	H10A_XENLA;Histone_H1.0-A
HVAEP1_T001940.1	OG0000137	H2AC1, H2AJ, H2AC20, H2AC18, H2AC19, H2AC6, H2AC14, H2AC12, H2AC7, H2AW, H2AW, H2AC4, H2AC8, H2AC11, H2AC13, H2AC15, H2AC16, H2AC17, H2AC21	ENSG00000164508, ENSG00000246705, ENSG00000184260, ENSG00000203812, ENSG00000272196, ENSG00000180573, ENSG00000276368, ENSG00000274997, ENSG00000196866, ENSG00000284841, ENSG00000181218, ENSG00000278463, ENSG00000277075, ENSG00000196787, ENSG00000196747, ENSG00000275221, ENSG00000276903, ENSG00000278677, ENSG00000184270	H2A.W histone, H2A clustered histone 1, H2A clustered histone 4, H2A clustered histone 15, H2A clustered histone 16, H2A clustered histone 17, H2A clustered histone 6, H2A clustered histone 7, H2A clustered histone 8, H2A clustered histone 14, H2A clustered histone 13, H2A clustered histone 11, H2A clustered histone 12, H2A.J histone, H2A clustered histone 20, H2A clustered histone 21	NA	PTHR23430:SF72	HISTONE H2A TYPE 2-B	PF00125; PF16211	Core histone H2A/H2B/H3/H4; C-terminus of histone H2A	H2AO_CHITH;Histone_H2A,_orphon
HVAEP1_T001941.1	OG0000344	H1-0	ENSG00000189060	H1.0 linker histone	NA	NA	NA	NA	NA	NA
HVAEP1_T001942.1	OG0000137	H2AC1, H2AJ, H2AC20, H2AC18, H2AC19, H2AC6, H2AC14, H2AC12, H2AC7, H2AW, H2AW, H2AC4, H2AC8, H2AC11, H2AC13, H2AC15, H2AC16, H2AC17, H2AC21	ENSG00000164508, ENSG00000246705, ENSG00000184260, ENSG00000203812, ENSG00000272196, ENSG00000180573, ENSG00000276368, ENSG00000274997, ENSG00000196866, ENSG00000284841, ENSG00000181218, ENSG00000278463, ENSG00000277075, ENSG00000196787, ENSG00000196747, ENSG00000275221, ENSG00000276903, ENSG00000278677, ENSG00000184270	H2A.W histone, H2A clustered histone 1, H2A clustered histone 4, H2A clustered histone 15, H2A clustered histone 16, H2A clustered histone 17, H2A clustered histone 6, H2A clustered histone 7, H2A clustered histone 8, H2A clustered histone 14, H2A clustered histone 13, H2A clustered histone 11, H2A clustered histone 12, H2A.J histone, H2A clustered histone 20, H2A clustered histone 21	NA	PTHR23430:SF72	HISTONE H2A TYPE 2-B	PF00125; PF16211	Core histone H2A/H2B/H3/H4; C-terminus of histone H2A	H2AO_CHITH;Histone_H2A,_orphon
HVAEP1_T001943.1	NA	NA	NA	NA	NA	PTHR23430:SF37	CORE HISTONE MACRO-H2A.2	PF16211; PF00125	C-terminus of histone H2A; Core histone H2A/H2B/H3/H4	H2AO_CHITH;Histone_H2A,_orphon
HVAEP1_T001944.1	NA	NA	NA	NA	NA	NA	NA	NA	NA	H31_CHLRE;Histone_H3_type_1
HVAEP1_T001945.1	NA	NA	NA	NA	NA	NA	NA	NA	NA	H2A_ASTRU;Histone_H2A
HVAEP1_T001946.1	OG0000344	H1-0	ENSG00000189060	H1.0 linker histone	NA	PTHR11467:SF102	HISTONE H1.0	PF00538	linker histone H1 and H5 family	H10A_XENLA;Histone_H1.0-A
HVAEP1_T001947.1	NA	NA	NA	NA	NA	NA	NA	NA	NA	H4_ACRFO;Histone_H4
HVAEP1_T001948.1	OG0000137	H2AC1, H2AJ, H2AC20, H2AC18, H2AC19, H2AC6, H2AC14, H2AC12, H2AC7, H2AW, H2AW, H2AC4, H2AC8, H2AC11, H2AC13, H2AC15, H2AC16, H2AC17, H2AC21	ENSG00000164508, ENSG00000246705, ENSG00000184260, ENSG00000203812, ENSG00000272196, ENSG00000180573, ENSG00000276368, ENSG00000274997, ENSG00000196866, ENSG00000284841, ENSG00000181218, ENSG00000278463, ENSG00000277075, ENSG00000196787, ENSG00000196747, ENSG00000275221, ENSG00000276903, ENSG00000278677, ENSG00000184270	H2A.W histone, H2A clustered histone 1, H2A clustered histone 4, H2A clustered histone 15, H2A clustered histone 16, H2A clustered histone 17, H2A clustered histone 6, H2A clustered histone 7, H2A clustered histone 8, H2A clustered histone 14, H2A clustered histone 13, H2A clustered histone 11, H2A clustered histone 12, H2A.J histone, H2A clustered histone 20, H2A clustered histone 21	NA	PTHR23430:SF303	HISTONE H2AX	PF00538; PF00125; PF16211	linker histone H1 and H5 family; Core histone H2A/H2B/H3/H4; C-terminus of histone H2A	H2AO_CHITH;Histone_H2A,_orphon
HVAEP1_T001949.1	NA	NA	NA	NA	NA	NA	NA	NA	NA	H32_CRILO;Histone_H3.2
HVAEP1_T001950.1	OG0000344	H1-0	ENSG00000189060	H1.0 linker histone	NA	PTHR11467:SF102	HISTONE H1.0	PF00538	linker histone H1 and H5 family	H10A_XENLA;Histone_H1.0-A
HVAEP1_T001951.1	NA	NA	NA	NA	NA	PTHR23430:SF199	HISTONE H2AX	NA	NA	H2A4_PSAMI;Late_histone_H2A.2.2
HVAEP1_T001952.1	NA	NA	NA	NA	NA	PTHR10484:SF185	HISTONE H4	PF15511	Centromere kinetochore component CENP-T histone fold	H4_ACRFO;Histone_H4
HVAEP1_T001953.1	OG0000344	H1-0	ENSG00000189060	H1.0 linker histone	NA	PTHR11467:SF102	HISTONE H1.0	PF00538	linker histone H1 and H5 family	H10A_XENLA;Histone_H1.0-A
HVAEP1_T001954.1	NA	NA	NA	NA	NA	PTHR10484:SF186	HISTONE H4	NA	NA	H4_ACRFO;Histone_H4
HVAEP1_T001955.1	OG0000214	H3c14	ENSMUSG00000093769	H3 clustered histone 14	NA	NA	NA	PF00125	Core histone H2A/H2B/H3/H4	H32_BOVIN;Histone_H3.2
HVAEP1_T001956.2	OG0000344	H1-0	ENSG00000189060	H1.0 linker histone	NA	PTHR11467:SF102	HISTONE H1.0	PF00538	linker histone H1 and H5 family	H10A_XENLA;Histone_H1.0-A
HVAEP1_T001957.1	NA	NA	NA	NA	NA	PTHR23430:SF303	HISTONE H2AX	PF16211	C-terminus of histone H2A	H2A_ASTRU;Histone_H2A
HVAEP1_T001958.2	OG0003091	TPP2	ENSG00000134900	tripeptidyl peptidase 2	NA	PTHR43806:SF14	TRIPEPTIDYL-PEPTIDASE 2	PF00082; PF12580	Subtilase family; Tripeptidyl peptidase II	TPP2_MOUSE;Tripeptidyl-peptidase_2
HVAEP1_T001959.1	OG0003428	WDR44	ENSG00000131725	WD repeat domain 44	NA	PTHR14221:SF53	WD REPEAT DOMAIN 44	PF00400	WD domain, G-beta repeat	WDR44_XENLA;WD_repeat-containing_protein_44
HVAEP1_T001961.1	OG0000078	XB5902317	ENSXETG00000026362	provisional ortholog of carboxylesterase 1C	AB513182.1; acetylcholinesterase	PTHR11559:SF391	CARBOXYLIC ESTER HYDROLASE	PF00135	Carboxylesterase family	PNBA_BACSU;Para-nitrobenzyl_esterase
HVAEP1_T001962.1	OG0003539	PCYT1B, PCYT1A	ENSG00000102230, ENSG00000161217	phosphate cytidylyltransferase 1B, choline, phosphate cytidylyltransferase 1A, choline	NA	PTHR10739	CYTIDYLYLTRANSFERASE	PF01467	Cytidylyltransferase-like	PCY1B_HUMAN;Choline-phosphate_cytidylyltransferase_B
HVAEP1_T001963.1	OG0003656	TPT1	ENSG00000133112	tumor protein, translationally-controlled 1	U76187.1; translationally controlled tumor protein	PTHR11991	TRANSLATIONALLY CONTROLLED TUMOR PROTEIN-RELATED	PF00838	Translationally controlled tumour protein	TCTP_HYDVU;Translationally-controlled_tumor_protein_homolog
HVAEP1_T001965.2	NA	NA	NA	NA	AM182482.1; Dickkopf 1/2/4-A protein (hydkk1/2/4-A gene), strain Basel	NA	NA	NA	NA	NA
HVAEP1_T001966.1	NA	NA	NA	NA	DQ127904.1; dickkopf-like protein Dlp-1 precursor	NA	NA	NA	NA	NA
HVAEP1_T001967.1	NA	NA	NA	NA	NA	NA	NA	PF00822	PMP-22/EMP/MP20/Claudin family	NA
HVAEP1_T001970.1	OG0005468	SDHC	ENSG00000143252	succinate dehydrogenase complex subunit C	NA	PTHR10978:SF5	SUCCINATE DEHYDROGENASE CYTOCHROME B560 SUBUNIT, MITOCHONDRIAL	PF01127	Succinate dehydrogenase/Fumarate reductase transmembrane subunit	C560_CRIGR;Succinate_dehydrogenase_cytochrome_b560_subunit,_mitochondrial
HVAEP1_T001974.1	NA	NA	NA	NA	FJ767839.1; strain Ind-Pune VEGF	PTHR11633:SF1	LD28763P	PF03128	CXCXC repeat	NA
HVAEP1_T001976.1	NA	NA	NA	NA	NA	NA	NA	PF11187	Protein of unknown function (DUF2974)	NA
HVAEP1_T001980.1	OG0000145	WNT11	ENSG00000085741	Wnt family member 11	AB425834.1; hywnt11 for secreted signaling factor Wnt11	PTHR12027:SF102	PROTEIN WNT	PF00110	wnt family	WNT4_CHICK;Protein_Wnt-4
HVAEP1_T001981.1	NA	NA	NA	NA	NA	PTHR23504:SF15	PROTEIN ZINC INDUCED FACILITATOR-LIKE 1	PF07690	Major Facilitator Superfamily	ZIF1_ARATH;Protein_ZINC_INDUCED_FACILITATOR_1
HVAEP1_T001984.1	NA	NA	NA	NA	NA	PTHR10131:SF138	TNF RECEPTOR ASSOCIATED FACTOR (TRAF) HOMOLOG	NA	NA	NA
HVAEP1_T001985.1	OG0000145	WNT11	ENSG00000085741	Wnt family member 11	NA	PTHR12027:SF70	PROTEIN WNT-16	PF00110	wnt family	WNT4_CHICK;Protein_Wnt-4
HVAEP1_T001986.3	OG0000344	H1-0	ENSG00000189060	H1.0 linker histone	NA	PTHR11467:SF102	HISTONE H1.0	PF00538	linker histone H1 and H5 family	H10A_XENLA;Histone_H1.0-A
HVAEP1_T001989.2	NA	NA	NA	NA	NA	PTHR38337	AGAP010540-PA	NA	NA	NA
HVAEP1_T001992.1	NA	NA	NA	NA	NA	NA	NA	PF05225	helix-turn-helix, Psq domain	NA
HVAEP1_T001993.1	NA	NA	NA	NA	NA	PTHR46182	FI19480P1	PF13385; PF00754; PF00431	Concanavalin A-like lectin/glucanases superfamily; F5/8 type C domain; CUB domain	CPXM1_MOUSE;Probable_carboxypeptidase_X1
HVAEP1_T001995.1	OG0000686	rrf-3, ego-1, rrf-1, rrf-2	WBGene00004510, WBGene00001214, WBGene00004508, WBGene00004509	Enhancer of Glp-One (glp-1), RNA-dependent RNA polymerase Family	NA	NA	NA	NA	NA	NA
HVAEP1_T001996.2	OG0000531	mys, Itgbn	FBgn0004657, FBgn0010395	NA	NA	PTHR10082	INTEGRIN BETA SUBUNIT	PF00362; PF07965; PF08725; PF07974	Integrin beta chain VWA domain; Integrin beta tail domain; Integrin beta cytoplasmic domain; EGF-like domain	ITBX_DROME;Integrin_beta-PS
HVAEP1_T001997.1	NA	NA	NA	NA	NA	PTHR11255:SF30	DIACYLGLYCEROL KINASE DELTA	PF00169; PF00781; PF07647; PF00130; PF00609	PH domain; Diacylglycerol kinase catalytic domain; SAM domain (Sterile alpha motif); Phorbol esters/diacylglycerol binding domain (C1 domain); Diacylglycerol kinase accessory domain	DGKH_HUMAN;Diacylglycerol_kinase_eta
HVAEP1_T001998.2	OG0002536	BACE1, BACE2	ENSG00000186318, ENSG00000182240	beta-secretase 2, beta-secretase 1	NA	PTHR47965:SF69	BETA-SECRETASE 1	PF00026	Eukaryotic aspartyl protease	BACE1_HUMAN;Beta-secretase_1
HVAEP1_T001999.1	OG0006332	GRXCR1	ENSG00000215203	glutaredoxin and cysteine rich domain containing 1	NA	PTHR46990	GLUTAREDOXIN DOMAIN-CONTAINING CYSTEINE-RICH PROTEIN 1	NA	NA	GRCR1_DROME;Glutaredoxin_domain-containing_cysteine-rich_protein_CG31559
HVAEP1_T002000.1	OG0004093	DPAGT1	ENSG00000172269	dolichyl-phosphate N-acetylglucosaminephosphotransferase 1	NA	PTHR10571:SF0	UDP-N-ACETYLGLUCOSAMINE--DOLICHYL-PHOSPHATE N-ACETYLGLUCOSAMINEPHOSPHOTRANSFERASE	PF00953	Glycosyl transferase family 4	GPT_CRIGR;UDP-N-acetylglucosamine--dolichyl-phosphate_N-acetylglucosaminephosphotransferase
HVAEP1_T002001.1	OG0001198	CUL4A, CUL4B	ENSG00000139842, ENSG00000158290	cullin 4A, cullin 4B	NA	PTHR11932:SF66	CULLIN-4B	PF10557; PF00888	Cullin protein neddylation domain; Cullin family	CUL4B_MOUSE;Cullin-4B
HVAEP1_T002004.2	OG0007919	#NAME?	FBgn0266172	NA	NA	NA	NA	NA	NA	NA
HVAEP1_T002006.2	NA	NA	NA	NA	NA	PTHR46187:SF3	ALKALINE CERAMIDASE 3	PF05875	Ceramidase	ACER3_MOUSE;Alkaline_ceramidase_3
HVAEP1_T002007.1	OG0002697	GSK3B, GSK3A	ENSG00000082701, ENSG00000105723	glycogen synthase kinase 3 alpha, glycogen synthase kinase 3 beta	AF272672.1; serine/threonine kinase GSK3	PTHR24057:SF14	GLYCOGEN SYNTHASE KINASE-3 ALPHA	PF00069	Protein kinase domain	GSK3B_XENLA;Glycogen_synthase_kinase-3_beta
HVAEP1_T002008.1	OG0005374	PSMC6	ENSG00000100519	proteasome 26S subunit, ATPase 6	NA	PTHR23073:SF76	26S PROTEASOME REGULATORY SUBUNIT 10B	PF00004; PF17862; PF16450	ATPase family associated with various cellular activities (AAA); AAA+ lid domain; Proteasomal ATPase OB C-terminal domain	PRS10_HUMAN;26S_proteasome_regulatory_subunit_10B
HVAEP1_T002009.1	OG0005273	NAT9	ENSG00000109065	N-acetyltransferase 9 (putative)	NA	PTHR13256	N-ACETYLTRANSFERASE 9	PF13302	Acetyltransferase (GNAT) domain	NAT9_NEMVE;N-acetyltransferase_9-like_protein
HVAEP1_T002010.1	OG0000096	ETS1, ETS2, GABPA	ENSG00000134954, ENSG00000157557, ENSG00000154727	ETS proto-oncogene 2, transcription factor, GA binding protein transcription factor subunit alpha, ETS proto-oncogene 1, transcription factor	DQ139842.1; ets-related protein	PTHR11849:SF195	GA-BINDING PROTEIN ALPHA CHAIN	PF00178	Ets-domain	GABPA_HUMAN;GA-binding_protein_alpha_chain
HVAEP1_T002011.1	OG0000096	ETS1, ETS2, GABPA	ENSG00000134954, ENSG00000157557, ENSG00000154727	ETS proto-oncogene 2, transcription factor, GA binding protein transcription factor subunit alpha, ETS proto-oncogene 1, transcription factor	NA	PTHR11849:SF195	GA-BINDING PROTEIN ALPHA CHAIN	PF00178; PF02198	Ets-domain; Sterile alpha motif (SAM)/Pointed domain	ELG_DROME;DNA-binding_protein_Ets97D
HVAEP1_T002012.1	OG0002795	PON1, PON2, PON3	ENSG00000005421, ENSG00000105854, ENSG00000105852	paraoxonase 3, paraoxonase 1, paraoxonase 2	NA	PTHR11799	PARAOXONASE	PF01731	Arylesterase	PON1_MOUSE;Serum_paraoxonase/arylesterase_1
HVAEP1_T002013.1	OG0007463	NEIL1	ENSG00000140398	nei like DNA glycosylase 1	NA	PTHR22993:SF9	ENDONUCLEASE 8-LIKE 1	PF09292; PF01149	Endonuclease VIII-like 1, DNA bind; Formamidopyrimidine-DNA glycosylase N-terminal domain	NEIL1_HUMAN;Endonuclease_8-like_1
HVAEP1_T002014.1	OG0003130	SPIRE2, SPIRE1	ENSG00000204991, ENSG00000134278	spire type actin nucleation factor 1, spire type actin nucleation factor 2	NA	PTHR21345:SF3	PROTEIN SPIRE	PF16474	Kinase non-catalytic C-lobe domain	SPIR1_HUMAN;Protein_spire_homolog_1
HVAEP1_T002015.1	NA	NA	NA	NA	NA	PTHR23035:SF2	CFAP97 DOMAIN-CONTAINING 1	PF13879	KIAA1430 homologue	CF97D_MOUSE;Sperm_axonemal_maintenance_protein_CFAP97D1
HVAEP1_T002017.1	OG0002500	TRIP12	ENSG00000153827	thyroid hormone receptor interactor 12	NA	NA	NA	PF00632; PF02825	HECT-domain (ubiquitin-transferase); WWE domain	TRIPC_XENTR;E3_ubiquitin-protein_ligase_TRIP12
HVAEP1_T002018.1	OG0001760	SKP1	ENSG00000113558	S-phase kinase associated protein 1	NA	PTHR11165:SF120	S-PHASE KINASE-ASSOCIATED PROTEIN 1	PF01466; PF03931	Skp1 family, dimerisation domain; Skp1 family, tetramerisation domain	SKP1_MOUSE;S-phase_kinase-associated_protein_1
HVAEP1_T002019.1	OG0002572	TTLL12	ENSG00000100304	tubulin tyrosine ligase like 12	NA	PTHR46088	TUBULIN--TYROSINE LIGASE-LIKE PROTEIN 12	PF03133	Tubulin-tyrosine ligase family	TTL12_MOUSE;Tubulin--tyrosine_ligase-like_protein_12
HVAEP1_T002020.1	OG0003240	CEP164	ENSG00000110274	centrosomal protein 164	NA	PTHR18902:SF27	CENTROSOMAL PROTEIN OF 164 KDA	PF00397	WW domain	CE164_HUMAN;Centrosomal_protein_of_164_kDa
HVAEP1_T002021.1	OG0004161	UBXN7	ENSG00000163960	UBX domain protein 7	NA	PTHR23322:SF6	UBX DOMAIN-CONTAINING PROTEIN 7	PF13899; PF14555; PF00789	Thioredoxin-like; UBA-like domain; UBX domain	UBXN7_HUMAN;UBX_domain-containing_protein_7
HVAEP1_T002022.2	OG0001847	TSTD3	ENSG00000279170	thiosulfate sulfurtransferase like domain containing 3	NA	PTHR44086:SF1	THIOSULFATE SULFURTRANSFERASE/RHODANESE-LIKE DOMAIN-CONTAINING PROTEIN 3	PF00581; PF01607	Rhodanese-like domain; Chitin binding Peritrophin-A domain	TSTD3_MOUSE;Thiosulfate_sulfurtransferase/rhodanese-like_domain-containing_protein_3
HVAEP1_T002026.1	OG0000848	DLG3, DLG2, DLG4, DLG1	ENSG00000082458, ENSG00000150672, ENSG00000132535, ENSG00000075711	discs large MAGUK scaffold protein 3, discs large MAGUK scaffold protein 2, discs large MAGUK scaffold protein 1, discs large MAGUK scaffold protein 4	NA	PTHR23119:SF5	DISKS LARGE HOMOLOG 1	PF07653; PF00625; PF00595	Variant SH3 domain; Guanylate kinase; PDZ domain	DLG1_XENTR;Disks_large_homolog_1
HVAEP1_T002033.1	NA	NA	NA	NA	NA	NA	NA	NA	NA	YTX2_XENLA;Transposon_TX1_uncharacterized_149_kDa_protein
HVAEP1_T002037.1	OG0000321	rpl22l1, txlna, tmprss11f, cpm, camlg, ncln, med9	ENSXETG00000035493, ENSXETG00000037891, ENSXETG00000040087, ENSXETG00000040612, ENSXETG00000038173, ENSXETG00000038007, ENSXETG00000035613		NA	NA	NA	NA	NA	NA
HVAEP1_T002044.1	OG0000007	ZMYM1	ENSG00000197056	zinc finger MYM-type containing 1	NA	PTHR46289:SF3	52 KDA REPRESSOR OF THE INHIBITOR OF THE PROTEIN KINASE-LIKE PROTEIN	PF05699	hAT family C-terminal dimerisation region	NA
HVAEP1_T002045.1	OG0000823	DCUN1D2, DCUN1D1	ENSG00000150401, ENSG00000043093	defective in cullin neddylation 1 domain containing 2, defective in cullin neddylation 1 domain containing 1	NA	PTHR12281:SF16	DCN1-LIKE PROTEIN 2	PF14555; PF03556	UBA-like domain; Cullin binding	DCNL1_HUMAN;DCN1-like_protein_1
HVAEP1_T002046.1	NA	NA	NA	NA	NA	PTHR47915	SI:DKEY-19B23.7	NA	NA	NA
HVAEP1_T002047.1	NA	NA	NA	NA	NA	NA	NA	PF02892	BED zinc finger	NA
HVAEP1_T002049.1	NA	NA	NA	NA	NA	PTHR22710	X-RAY RADIATION RESISTANCE ASSOCIATED PROTEIN 1 XRRA1	NA	NA	XRRA1_MOUSE;X-ray_radiation_resistance-associated_protein_1
HVAEP1_T002050.1	NA	NA	NA	NA	NA	NA	NA	PF07647	SAM domain (Sterile alpha motif)	NA
HVAEP1_T002052.1	OG0001688	AMPD1, AMPD3	ENSG00000116748, ENSG00000133805	adenosine monophosphate deaminase 3, adenosine monophosphate deaminase 1	NA	PTHR11359:SF3	AMP DEAMINASE 2	PF00962	Adenosine/AMP deaminase	AMPD2_MOUSE;AMP_deaminase_2
HVAEP1_T002053.1	NA	NA	NA	NA	NA	PTHR24240:SF133	OPSIN RH3-LIKE PROTEIN	PF00001	7 transmembrane receptor (rhodopsin family)	OPN4B_XENLA;Melanopsin-B
HVAEP1_T002054.1	OG0003928	l302640	FBgn0010786	NA	NA	PTHR11557:SF0	PORPHOBILINOGEN DEAMINASE	PF03900; PF01379	Porphobilinogen deaminase, C-terminal domain; Porphobilinogen deaminase, dipyromethane cofactor binding domain	HEM3_BOVIN;Porphobilinogen_deaminase
HVAEP1_T002055.1	OG0006089	ZBTB8OS	ENSG00000176261	zinc finger and BTB domain containing 8 opposite strand	NA	PTHR12682:SF11	PROTEIN ARCHEASE	PF01951	Archease protein family (MTH1598/TM1083)	ARCH_DROME;Protein_archease-like
HVAEP1_T002056.1	NA	NA	NA	NA	NA	NA	NA	PF00001	7 transmembrane receptor (rhodopsin family)	OPN4B_XENLA;Melanopsin-B
HVAEP1_T002058.1	OG0001206	LMOD3, LMOD1, LMOD2, TMOD2, TMOD3, TMOD4, TMOD1	ENSG00000163380, ENSG00000163431, ENSG00000170807, ENSG00000128872, ENSG00000138594, ENSG00000163157, ENSG00000136842	tropomodulin 1, uncharacterized LOC112268148, tropomodulin 3, tropomodulin 2, leiomodin 2, leiomodin 3, leiomodin 1, tropomodulin 4	NA	NA	NA	NA	NA	TMOD3_HUMAN;Tropomodulin-3
HVAEP1_T002059.1	NA	NA	NA	NA	NA	NA	NA	PF05225	helix-turn-helix, Psq domain	NA
HVAEP1_T002060.1	OG0000071	TSPAN7, TSPAN6	ENSG00000156298, ENSG00000000003	tetraspanin 7, tetraspanin 6	NA	PTHR19282:SF471	CD63 ANTIGEN	PF00335	Tetraspanin family	TSN6_BOVIN;Tetraspanin-6
HVAEP1_T002063.1	NA	NA	NA	NA	NA	PTHR33309:SF5	MICROSOMAL DIPEPTIDASE FAMILY PROTEIN	NA	NA	NA
HVAEP1_T002065.1	NA	NA	NA	NA	NA	PTHR24240:SF133	OPSIN RH3-LIKE PROTEIN	PF00001	7 transmembrane receptor (rhodopsin family)	OPSD1_MIZYE;Rhodopsin,_GQ-coupled
HVAEP1_T002069.1	OG0002261	AGPAT1, AGPAT1, AGPAT1, AGPAT1, AGPAT1, AGPAT1, AGPAT1, AGPAT2	ENSG00000236873, ENSG00000227642, ENSG00000228892, ENSG00000235758, ENSG00000206324, ENSG00000226467, ENSG00000204310, ENSG00000169692	1-acylglycerol-3-phosphate O-acyltransferase 1, 1-acylglycerol-3-phosphate O-acyltransferase 2	NA	PTHR10434:SF2	1-ACYL-SN-GLYCEROL-3-PHOSPHATE ACYLTRANSFERASE BETA	PF01553	Acyltransferase	PLCA_HUMAN;1-acyl-sn-glycerol-3-phosphate_acyltransferase_alpha
HVAEP1_T002070.1	OG0006006	BRCC3	ENSG00000185515	BRCA1/BRCA2-containing complex subunit 3	NA	PTHR10410:SF2	LYS-63-SPECIFIC DEUBIQUITINASE BRCC36-RELATED	PF01398; PF18110	JAB1/Mov34/MPN/PAD-1 ubiquitin protease; BRCC36 C-terminal helical domain	BRCC3_SALSA;Lys-63-specific_deubiquitinase_BRCC36
HVAEP1_T002071.1	OG0002325	MED12L, MED12	ENSG00000144893, ENSG00000184634	mediator complex subunit 12, mediator complex subunit 12L	NA	PTHR46007:SF3	MEDIATOR OF RNA POLYMERASE II TRANSCRIPTION SUBUNIT 12-LIKE PROTEIN	PF12145; PF09497	Eukaryotic Mediator 12 subunit domain; Transcription mediator complex subunit Med12	MD12L_HUMAN;Mediator_of_RNA_polymerase_II_transcription_subunit_12-like_protein
HVAEP1_T002073.1	NA	NA	NA	NA	NA	NA	NA	PF00001	7 transmembrane receptor (rhodopsin family)	OPN4_RAT;Melanopsin
HVAEP1_T002077.1	OG0002309	SLC40A1	ENSG00000138449	solute carrier family 40 member 1	NA	PTHR11660	SOLUTE CARRIER FAMILY 40 MEMBER	PF06963	Ferroportin1 (FPN1)	S40A1_DANRE;Solute_carrier_family_40_member_1
HVAEP1_T002078.2	NA	NA	NA	NA	NA	NA	NA	PF00582	Universal stress protein family	YXIE_BACSU;Universal_stress_protein_YxiE
HVAEP1_T002079.1	NA	NA	NA	NA	NA	NA	NA	PF00582	Universal stress protein family	YXIE_BACSU;Universal_stress_protein_YxiE
HVAEP1_T002083.1	NA	NA	NA	NA	NA	PTHR12062:SF0	ALPHA-1,3-MANNOSYL-GLYCOPROTEIN 4-BETA-N-ACETYLGLUCOSAMINYLTRANSFERASE A-LIKE	NA	NA	MGT4C_HUMAN;Alpha-1,3-mannosyl-glycoprotein_4-beta-N-acetylglucosaminyltransferase_C
HVAEP1_T002084.1	OG0000215	CG10431	FBgn0032730	NA	NA	NA	NA	PF05485; PF12017	THAP domain; Transposase protein	NA
HVAEP1_T002087.1	NA	NA	NA	NA	NA	NA	NA	PF00059	Lectin C-type domain	MRC2_HUMAN;C-type_mannose_receptor_2
HVAEP1_T002089.1	NA	NA	NA	NA	NA	NA	NA	PF07714; PF00059	Protein tyrosine and serine/threonine kinase; Lectin C-type domain	LIT1_MOUSE;Lithostathine-1
HVAEP1_T002090.1	NA	NA	NA	NA	NA	PTHR24416:SF359	HYPOXIA INHIBITED RECEPTOR TYROSINE KINASE	PF07714	Protein tyrosine and serine/threonine kinase	RET_MOUSE;Proto-oncogene_tyrosine-protein_kinase_receptor_Ret
HVAEP1_T002097.2	OG0000016	clec-199, clec-202, clec-198	WBGene00007820, WBGene00007822, WBGene00008203	C-type LECtin	NA	NA	NA	PF00059	Lectin C-type domain	MRC2_MOUSE;C-type_mannose_receptor_2
HVAEP1_T002100.1	NA	NA	NA	NA	NA	NA	NA	PF00059	Lectin C-type domain	MRC1_HUMAN;Macrophage_mannose_receptor_1
HVAEP1_T002103.2	OG0000506	CASK, MPP1	ENSG00000147044, ENSG00000130830	calcium/calmodulin dependent serine protein kinase, membrane palmitoylated protein 1	LN868218.1; Peripheral plasma membrane protein CASK (CASKL gene), strain Jussy	PTHR23122:SF7	PERIPHERAL PLASMA MEMBRANE PROTEIN CASK	PF00625; PF00595; PF00069	Guanylate kinase; PDZ domain; Protein kinase domain	CSKP_HUMAN;Peripheral_plasma_membrane_protein_CASK
HVAEP1_T002104.1	OG0004405	COG6	ENSG00000133103	component of oligomeric golgi complex 6	NA	PTHR21506	COMPONENT OF OLIGOMERIC GOLGI COMPLEX 6	PF06419	Conserved oligomeric complex COG6	COG6_RAT;Conserved_oligomeric_Golgi_complex_subunit_6
HVAEP1_T002105.1	OG0007399	ICE2	ENSG00000128915	interactor of little elongation complex ELL subunit 2	NA	PTHR14633	LITTLE ELONGATION COMPLEX SUBUNIT 2	PF10505	NMDA receptor-regulated gene protein 2 C-terminus	ICE2_HUMAN;Little_elongation_complex_subunit_2
HVAEP1_T002106.1	NA	NA	NA	NA	NA	NA	NA	PF00078	Reverse transcriptase (RNA-dependent DNA polymerase)	RTBS_DROME;Probable_RNA-directed_DNA_polymerase_from_transposon_BS
HVAEP1_T002107.2	OG0006326	ACTR8	ENSG00000113812	actin related protein 8	NA	PTHR11937:SF13	ACTIN-RELATED PROTEIN 8	PF00022	Actin	ARP8_SALSA;Actin-related_protein_8
HVAEP1_T002108.1	OG0005662	RPP25, RPP25L	ENSG00000178718, ENSG00000164967	ribonuclease P/MRP subunit p25 like, ribonuclease P and MRP subunit p25	NA	NA	NA	NA	NA	NA
HVAEP1_T002109.1	OG0003620	DZANK1	ENSG00000089091	double zinc ribbon and ankyrin repeat domains 1	NA	PTHR16058	DOUBLE ZINC RIBBON AND ANKYRIN REPEAT-CONTAINING PROTEIN 1	PF12773; PF13290	Double zinc ribbon; Chitobiase/beta-hexosaminidase C-terminal domain	DZAN1_HUMAN;Double_zinc_ribbon_and_ankyrin_repeat-containing_protein_1
HVAEP1_T002110.1	OG0005326	POLR2H	ENSG00000163882	RNA polymerase II, I and III subunit H	NA	PTHR10917	DNA-DIRECTED RNA POLYMERASES I, II, AND III SUBUNIT RPABC3	PF03870	RNA polymerase Rpb8	RPAB3_HUMAN;DNA-directed_RNA_polymerases_I,_II,_and_III_subunit_RPABC3
HVAEP1_T002112.1	OG0001139	Npc2g, Npc2h	FBgn0039800, FBgn0039801	NA	NA	PTHR11306:SF30	NPC INTRACELLULAR CHOLESTEROL TRANSPORTER 2	PF02221	ML domain	NPC2_MOUSE;NPC_intracellular_cholesterol_transporter_2
HVAEP1_T002113.1	OG0001139	Npc2g, Npc2h	FBgn0039800, FBgn0039801	NA	NA	PTHR11306:SF30	NPC INTRACELLULAR CHOLESTEROL TRANSPORTER 2	PF02221	ML domain	NPC2_DROME;NPC_intracellular_cholesterol_transporter_2_homolog_a
HVAEP1_T002114.1	NA	NA	NA	NA	NA	PTHR43123:SF1	CHITIN DEACETYLASE 1	PF04115; PF01522	Ureidoglycolate lyase; Polysaccharide deacetylase	CDA1_SCHPO;Putative_polysaccharide_deacetylase
HVAEP1_T002116.3	OG0001139	Npc2g, Npc2h	FBgn0039800, FBgn0039801	NA	NA	PTHR11306:SF30	NPC INTRACELLULAR CHOLESTEROL TRANSPORTER 2	PF02221	ML domain	NPC2_DANRE;NPC_intracellular_cholesterol_transporter_2
HVAEP1_T002119.1	NA	NA	NA	NA	FJ496651.1; kazal-type serine protease inihibitor 3 (kazal3)	PTHR21312:SF28	OVOMUCOID-RELATED	PF00050	Kazal-type serine protease inhibitor domain	TU92_POLAB;Turripeptide_Pal9.2
HVAEP1_T002120.1	NA	NA	NA	NA	FJ496652.1; kazal-type serine protease inihibitor 4 (kazal4)	PTHR10913:SF45	MIP10102P-RELATED	PF07648	Kazal-type serine protease inhibitor domain	TEFF2_MOUSE;Tomoregulin-2
HVAEP1_T002121.1	NA	NA	NA	NA	AM110763.1; putative serine protease inhibitor (kazal1 gene)	PTHR10913:SF75	OVOINHIBITOR	PF00050	Kazal-type serine protease inhibitor domain	TU92_GEMSO;Turripeptide_Gsg9.2
HVAEP1_T002122.1	NA	NA	NA	NA	FJ496650.1; kazal-type serine protease inihibitor 2 (kazal2)	PTHR10913:SF68	MSANTD3-TMEFF1 FUSION PROTEIN	PF07648	Kazal-type serine protease inhibitor domain	AGRIN_RAT;Agrin
HVAEP1_T002124.1	NA	NA	NA	NA	FJ496653.1; kazal-type serine protease inihibitor 5 (kazal5)	PTHR10913:SF68	MSANTD3-TMEFF1 FUSION PROTEIN	PF07648	Kazal-type serine protease inhibitor domain	AGRIN_HUMAN;Agrin
HVAEP1_T002125.2	OG0001139	Npc2g, Npc2h	FBgn0039800, FBgn0039801	NA	NA	PTHR11306:SF30	NPC INTRACELLULAR CHOLESTEROL TRANSPORTER 2	PF02221	ML domain	NPC2_HUMAN;NPC_intracellular_cholesterol_transporter_2
HVAEP1_T002126.1	NA	NA	NA	NA	NA	PTHR48015:SF21	MISSHAPEN, ISOFORM A	PF00069; PF00780	Protein kinase domain; CNH domain	MIG15_CAEEL;Serine/threonine-protein_kinase_mig-15
HVAEP1_T002128.1	NA	NA	NA	NA	NA	PTHR46289:SF3	52 KDA REPRESSOR OF THE INHIBITOR OF THE PROTEIN KINASE-LIKE PROTEIN	NA	NA	NA
HVAEP1_T002131.1	OG0001685	RBM11, RBM7	ENSG00000185272, ENSG00000076053	RNA binding motif protein 11, RNA binding motif protein 7	NA	PTHR13798	RNA BINDING MOTIF RBM PROTEIN -RELATED	PF00076	RNA recognition motif. (a.k.a. RRM, RBD, or RNP domain)	RBM7_BOVIN;RNA-binding_protein_7
HVAEP1_T002132.1	OG0003199	SEPHS2, SEPHS1	ENSG00000179918, ENSG00000086475	selenophosphate synthetase 1, selenophosphate synthetase 2	NA	PTHR10256:SF1	SELENIDE, WATER DIKINASE 2	PF00586; PF02769	AIR synthase related protein, N-terminal domain; AIR synthase related protein, C-terminal domain	SPS2_HUMAN;Selenide,_water_dikinase_2
HVAEP1_T002133.1	OG0000739	SLC27A1, SLC27A4	ENSG00000130304, ENSG00000167114	solute carrier family 27 member 1, solute carrier family 27 member 4	NA	PTHR43107	LONG-CHAIN FATTY ACID TRANSPORT PROTEIN	PF00501; PF13193	AMP-binding enzyme; AMP-binding enzyme C-terminal domain	S27A4_MOUSE;Long-chain_fatty_acid_transport_protein_4
HVAEP1_T002135.2	OG0006276	CNTROB	ENSG00000170037	centrobin, centriole duplication and spindle assembly protein	NA	PTHR34439	CENTROBIN	NA	NA	CNTRB_MOUSE;Centrobin
HVAEP1_T002140.1	OG0000024	Dscam4	FBgn0263219	NA	NA	PTHR13817:SF54	DOWN SYNDROME CELL ADHESION MOLECULE-LIKE PROTEIN 1 HOMOLOG	PF00041; PF13895; PF07679	Fibronectin type III domain; Immunoglobulin domain; Immunoglobulin I-set domain	DSCL1_CHICK;Down_syndrome_cell_adhesion_molecule-like_protein_1_homolog
HVAEP1_T002141.1	NA	NA	NA	NA	NA	PTHR10947:SF0	PHENYLALANINE--TRNA LIGASE BETA SUBUNIT	PF03484; PF03483; PF18262; PF17759	tRNA synthetase B5 domain; B3/4 domain; Phe-tRNA synthetase beta subunit B1 domain; Phenylalanyl tRNA synthetase beta chain CLM domain	SYFB_MOUSE;Phenylalanine--tRNA_ligase_beta_subunit
HVAEP1_T002147.1	OG0000344	H1-0	ENSG00000189060	H1.0 linker histone	NA	PTHR11467:SF102	HISTONE H1.0	PF00538	linker histone H1 and H5 family	H10_PONAB;Histone_H1.0
HVAEP1_T002148.1	NA	NA	NA	NA	NA	PTHR43388	HYDROGENASE MATURATION FACTOR HOXX	PF00551; PF00378; PF02911	Formyl transferase; Enoyl-CoA hydratase/isomerase; Formyl transferase, C-terminal domain	HOXX_BRADU;Hydrogenase_maturation_factor_HoxX
HVAEP1_T002149.1	OG0004402	NMD3	ENSG00000169251	NMD3 ribosome export adaptor	NA	PTHR12746:SF2	60S RIBOSOMAL EXPORT PROTEIN NMD3	PF04981	NMD3 family	NMD3_XENTR;60S_ribosomal_export_protein_NMD3
HVAEP1_T002154.1	OG0005375	DNAJC21	ENSG00000168724	DnaJ heat shock protein family (Hsp40) member C21	NA	PTHR44029	DNAJ HOMOLOG SUBFAMILY C MEMBER 21	PF12171; PF00226	Zinc-finger double-stranded RNA-binding; DnaJ domain	DJC21_DANRE;DnaJ_homolog_subfamily_C_member_21
HVAEP1_T002155.1	NA	NA	NA	NA	NA	NA	NA	NA	NA	H2A_ASTRU;Histone_H2A
HVAEP1_T002156.1	NA	NA	NA	NA	NA	NA	NA	NA	NA	H41_ASHGO;Histone_H4.1
HVAEP1_T002157.1	OG0002994	LRRC71	ENSG00000160838	leucine rich repeat containing 71	NA	PTHR46984	LEUCINE-RICH REPEAT-CONTAINING PROTEIN 71	PF13516	Leucine Rich repeat	LRC71_MOUSE;Leucine-rich_repeat-containing_protein_71
HVAEP1_T002158.2	OG0004409	CCDC191	ENSG00000163617	coiled-coil domain containing 191	NA	PTHR22028:SF5	COILED-COIL DOMAIN-CONTAINING PROTEIN 191	NA	NA	CC191_MACFA;Coiled-coil_domain-containing_protein_191
HVAEP1_T002159.2	OG0000569	CG3719	FBgn0024986	NA	NA	PTHR43601:SF3	THIOREDOXIN, MITOCHONDRIAL	PF00085	Thioredoxin	THIOM_HUMAN;Thioredoxin,_mitochondrial
HVAEP1_T002161.1	NA	NA	NA	NA	NA	PTHR34153:SF8	SI:DKEY-65L23.2	NA	NA	NA
HVAEP1_T002163.1	OG0004163	TMEM167A	ENSG00000174695	transmembrane protein 167A	NA	PTHR13229:SF2	PROTEIN KISH-A	PF06842	Protein of unknown function (DUF1242)	KISHA_MOUSE;Protein_kish-A
HVAEP1_T002164.1	OG0004855	ZPR1	ENSG00000109917	ZPR1 zinc finger	NA	PTHR10876	ZINC FINGER PROTEIN ZPR1	PF03367	ZPR1 zinc-finger domain	ZPR1_BOVIN;Zinc_finger_protein_ZPR1
HVAEP1_T002165.1	OG0001469	KY	ENSG00000174611	kyphoscoliosis peptidase	NA	NA	NA	NA	NA	KY_HUMAN;Kyphoscoliosis_peptidase
HVAEP1_T002168.1	OG0005522	RBM42	ENSG00000126254	RNA binding motif protein 42	NA	PTHR13952:SF8	RNA BINDING MOTIF PROTEIN HOMOLOG	PF00076	RNA recognition motif. (a.k.a. RRM, RBD, or RNP domain)	RBM42_DANRE;RNA-binding_protein_42
HVAEP1_T002169.2	NA	NA	NA	NA	NA	PTHR15128	TAL1 SCL INTERRUPTING LOCUS	PF15253	SCL-interrupting locus protein N-terminus	STIL_XENLA;SCL-interrupting_locus_protein_homolog
HVAEP1_T002172.1	NA	NA	NA	NA	NA	NA	NA	PF02892	BED zinc finger	NA
HVAEP1_T002181.1	OG0002356	CG17078	FBgn0086855	NA	NA	NA	NA	NA	NA	NA
HVAEP1_T002182.1	NA	NA	NA	NA	NA	PTHR11339:SF228	OTOGELIN	PF05270	Alpha-L-arabinofuranosidase B (ABFB) domain	NA
HVAEP1_T002187.1	OG0000321	rpl22l1, txlna, tmprss11f, cpm, camlg, ncln, med9	ENSXETG00000035493, ENSXETG00000037891, ENSXETG00000040087, ENSXETG00000040612, ENSXETG00000038173, ENSXETG00000038007, ENSXETG00000035613		NA	NA	NA	PF00078	Reverse transcriptase (RNA-dependent DNA polymerase)	YTX2_XENLA;Transposon_TX1_uncharacterized_149_kDa_protein
HVAEP1_T002202.1	OG0000976	Gm21833, Gm21962, Gm21750, Gm21897	ENSMUSG00000094030, ENSMUSG00000094856, ENSMUSG00000096463, ENSMUSG00000094472		NA	NA	NA	NA	NA	NA
HVAEP1_T002229.2	OG0000478	rad	FBgn0265597	NA	NA	PTHR15711:SF25	RADISH, ISOFORM I	PF00651; PF02145	BTB/POZ domain; Rap/ran-GAP	RPGP1_HUMAN;Rap1_GTPase-activating_protein_1
HVAEP1_T002231.1	OG0000024	ROBO2, ROBO1, ROBO3	ENSG00000185008, ENSG00000169855, ENSG00000154134	roundabout guidance receptor 2, roundabout guidance receptor 1, roundabout guidance receptor 3	NA	PTHR44170:SF9	ROUNDABOUT HOMOLOG 2	PF00041; PF13927; PF07679	Fibronectin type III domain; Immunoglobulin domain; Immunoglobulin I-set domain	ROBO1_HUMAN;Roundabout_homolog_1
HVAEP1_T002232.1	OG0000147	MFS9	FBgn0038799	NA	NA	PTHR11662:SF437	GH23975P	PF07690	Major Facilitator Superfamily	S17A5_HUMAN;Sialin
HVAEP1_T002233.1	OG0002749	ARPC1A, ARPC1B	ENSG00000241685, ENSG00000130429	actin related protein 2/3 complex subunit 1B, actin related protein 2/3 complex subunit 1A	NA	PTHR10709:SF11	ACTIN-RELATED PROTEIN 2/3 COMPLEX SUBUNIT 1A	PF00400	WD domain, G-beta repeat	AR1AA_XENLA;Actin-related_protein_2/3_complex_subunit_1A-A
HVAEP1_T002234.1	OG0002174	DFFB	ENSG00000169598	DNA fragmentation factor subunit beta	NA	PTHR13067	CASPASE-ACTIVATED DNASE	PF02017; PF09230	CIDE-N domain; DNA fragmentation factor 40 kDa	DFFB_RAT;DNA_fragmentation_factor_subunit_beta
HVAEP1_T002235.1	OG0007911	F25H2.7, F32H2.8, F32H2.11, C54C8.4, F31F4.1, ZK1055.4, T26E4.7, F41D3.7, F41D3.11, ZK1055.2, F46F5.14, T08G2.2	WBGene00009121, WBGene00009345, WBGene00043049, WBGene00008292, WBGene00017957, WBGene00022845, WBGene00012049, WBGene00009612, WBGene00009616, WBGene00022843, WBGene00018505, WBGene00020365	hypothetical protein	NA	PTHR31562	PROTEIN CBG18972	PF03314	Protein of unknown function, DUF273	NA
HVAEP1_T002236.1	OG0007911	F25H2.7, F32H2.8, F32H2.11, C54C8.4, F31F4.1, ZK1055.4, T26E4.7, F41D3.7, F41D3.11, ZK1055.2, F46F5.14, T08G2.2	WBGene00009121, WBGene00009345, WBGene00043049, WBGene00008292, WBGene00017957, WBGene00022845, WBGene00012049, WBGene00009612, WBGene00009616, WBGene00022843, WBGene00018505, WBGene00020365	hypothetical protein	NA	PTHR31562	PROTEIN CBG18972	PF03314	Protein of unknown function, DUF273	NA
HVAEP1_T002238.1	OG0004389	ALG9	ENSG00000086848	ALG9 alpha-1,2-mannosyltransferase	NA	PTHR22760:SF2	ALPHA-1,2-MANNOSYLTRANSFERASE ALG9	PF03901	Alg9-like mannosyltransferase family	ALG9_HUMAN;Alpha-1,2-mannosyltransferase_ALG9
HVAEP1_T002239.1	OG0002174	DFFB	ENSG00000169598	DNA fragmentation factor subunit beta	NA	PTHR13067	CASPASE-ACTIVATED DNASE	PF09230	DNA fragmentation factor 40 kDa	DFFB_MOUSE;DNA_fragmentation_factor_subunit_beta
HVAEP1_T002240.1	NA	NA	NA	NA	NA	PTHR46169:SF14	SIN3-HDAC COMPLEX-ASSOCIATED FACTOR,-LIKE-RELATED	NA	NA	NA
HVAEP1_T002242.1	OG0004389	ALG9	ENSG00000086848	ALG9 alpha-1,2-mannosyltransferase	NA	PTHR22760:SF2	ALPHA-1,2-MANNOSYLTRANSFERASE ALG9	PF03901	Alg9-like mannosyltransferase family	ALG9_HUMAN;Alpha-1,2-mannosyltransferase_ALG9
HVAEP1_T002243.3	NA	NA	NA	NA	NA	PTHR21646:SF35	UBIQUITIN CARBOXYL-TERMINAL HYDROLASES FAMILY 2	PF00443	Ubiquitin carboxyl-terminal hydrolase	UBP4_RAT;Ubiquitin_carboxyl-terminal_hydrolase_4
HVAEP1_T002246.1	OG0004836	synj1	ENSXETG00000037089	uncharacterized LOC100486142	NA	NA	NA	NA	NA	NA
HVAEP1_T002252.1	OG0000002	T16H12.13	WBGene00194725	hypothetical protein	NA	PTHR22955:SF60	PROTEIN CBG26950	NA	NA	NA
HVAEP1_T002261.1	NA	NA	NA	NA	NA	PTHR31912:SF32	ZINC FINGER, C2H2 TYPE DOMAINCONTAINING PROTEIN	NA	NA	NA
HVAEP1_T002263.1	NA	NA	NA	NA	NA	PTHR24416:SF359	HYPOXIA INHIBITED RECEPTOR TYROSINE KINASE	PF07714	Protein tyrosine and serine/threonine kinase	TORSO_BOMMO;Tyrosine-protein_kinase_receptor_torso
HVAEP1_T002264.2	OG0004088	TBC1D23	ENSG00000036054	TBC1 domain family member 23	NA	PTHR13297	UNCHARACTERIZED	PF00581; PF00566	Rhodanese-like domain; Rab-GTPase-TBC domain	TBC23_PONAB;TBC1_domain_family_member_23
HVAEP1_T002265.1	OG0000391	GRTP1	ENSG00000139835	growth hormone regulated TBC protein 1	NA	PTHR22957:SF359	GROWTH HORMONE-REGULATED TBC PROTEIN 1	PF00566	Rab-GTPase-TBC domain	GRTP1_XENTR;Growth_hormone-regulated_TBC_protein_1
HVAEP1_T002266.2	OG0000979	FASLG, TNFSF14, TNFSF15, TNF, TNF, TNF, TNF, TNF, TNF, TNF, TNF, LTA, LTA, LTA, LTA, LTA, LTA, LTA, CD40LG, TNFSF11, TNFSF10	ENSG00000117560, ENSG00000125735, ENSG00000181634, ENSG00000228978, ENSG00000230108, ENSG00000223952, ENSG00000228849, ENSG00000228321, ENSG00000204490, ENSG00000206439, ENSG00000232810, ENSG00000226275, ENSG00000223919, ENSG00000173503, ENSG00000230279, ENSG00000231408, ENSG00000226979, ENSG00000238130, ENSG00000102245, ENSG00000120659, ENSG00000121858	tumor necrosis factor, lymphotoxin alpha, TNF superfamily member 11, TNF superfamily member 14, TNF superfamily member 15, CD40 ligand, TNF superfamily member 10, Fas ligand	NA	PTHR11471	TUMOR NECROSIS FACTOR FAMILY MEMBER	PF00229; PF01391	TNF(Tumour Necrosis Factor) family; Collagen triple helix repeat (20 copies)	TNF10_HUMAN;Tumor_necrosis_factor_ligand_superfamily_member_10
HVAEP1_T002267.1	OG0000008	hyal1	ENSXETG00000040648	transmembrane serine protease 2 gene 1	NA	NA	NA	PF00089	Trypsin	TM11B_MOUSE;Transmembrane_protease_serine_11B-like_protein
HVAEP1_T002269.1	NA	NA	NA	NA	NA	NA	NA	PF02892	BED zinc finger	NA
HVAEP1_T002270.1	OG0002345	KDM6B, KDM6A, UTY	ENSG00000132510, ENSG00000147050, ENSG00000183878	ubiquitously transcribed tetratricopeptide repeat containing, Y-linked, lysine demethylase 6A, lysine demethylase 6B	NA	PTHR14017:SF9	LYSINE-SPECIFIC DEMETHYLASE 6A	PF02373; PF13432	JmjC domain, hydroxylase; Tetratricopeptide repeat	UTY_MOUSE;Histone_demethylase_UTY
HVAEP1_T002271.1	NA	NA	NA	NA	GU121226.1; p75-like protein	NA	NA	PF00020; PF00531	TNFR/NGFR cysteine-rich region; Death domain	TNR16_HUMAN;Tumor_necrosis_factor_receptor_superfamily_member_16
HVAEP1_T002274.1	NA	NA	NA	NA	NA	NA	NA	PF02822	Antistasin family	VP302_LYCMC;Venom_protein_302
HVAEP1_T002276.1	NA	NA	NA	NA	NA	NA	NA	PF00219; PF02822	Insulin-like growth factor binding protein; Antistasin family	VP302_LYCMC;Venom_protein_302
HVAEP1_T002277.1	NA	NA	NA	NA	NA	PTHR14186:SF20	SI:CH73-330K17.3	PF02822; PF00219	Antistasin family; Insulin-like growth factor binding protein	CRIM1_DANRE;Cysteine-rich_motor_neuron_1_protein
HVAEP1_T002280.1	OG0005456	IFT81	ENSG00000122970	intraflagellar transport 81	NA	PTHR15614	INTRAFLAGELLAR TRANSPORT PROTEIN 81 HOMOLOG	PF08694; PF18383	Ubiquitin-fold modifier-conjugating enzyme 1; Intraflagellar transport 81 calponin homology domain	IFT81_RAT;Intraflagellar_transport_protein_81_homolog
HVAEP1_T002281.1	NA	NA	NA	NA	NA	NA	NA	PF15299	Amyotrophic lateral sclerosis 2 chromosomal region candidate gene 8	NA
HVAEP1_T002282.1	NA	NA	NA	NA	NA	NA	NA	PF15299	Amyotrophic lateral sclerosis 2 chromosomal region candidate gene 8	NA
HVAEP1_T002283.2	NA	NA	NA	NA	NA	PTHR45749:SF9	AC-LIKE TRANSPOSASE	PF14291	Domain of unknown function (DUF4371)	ZMYM5_MACFA;Zinc_finger_MYM-type_protein_5
HVAEP1_T002284.1	NA	NA	NA	NA	NA	NA	NA	PF01335	Death effector domain	NA
HVAEP1_T002291.1	NA	NA	NA	NA	NA	NA	NA	PF09673; PF06834	Type-F conjugative transfer system pilin assembly protein; TraU protein	TRAU_ECOLI;Protein_TraU
HVAEP1_T002292.1	OG0005137	zuc	FBgn0261266	NA	NA	PTHR43856	CARDIOLIPIN HYDROLASE	PF13091	PLD-like domain	PLD_RICCN;Phospholipase_D
HVAEP1_T002295.1	OG0001543	RSPH1	ENSG00000160188	radial spoke head component 1	NA	NA	NA	PF02493	MORN repeat	RSPH1_MOUSE;Radial_spoke_head_1_homolog
HVAEP1_T002296.2	NA	NA	NA	NA	NA	PTHR46013	VASCULAR CELL ADHESION MOLECULE 1	PF13895	Immunoglobulin domain	HMCN1_MOUSE;Hemicentin-1
HVAEP1_T002298.1	NA	NA	NA	NA	NA	PTHR10773:SF12	DNA-DIRECTED RNA POLYMERASES I, II, AND III SUBUNIT RPABC2	NA	NA	NA
HVAEP1_T002299.1	NA	NA	NA	NA	NA	NA	NA	PF00219; PF02822	Insulin-like growth factor binding protein; Antistasin family	VP302_LYCMC;Venom_protein_302
HVAEP1_T002300.1	NA	NA	NA	NA	NA	PTHR14186:SF20	SI:CH73-330K17.3	PF02822; PF00219	Antistasin family; Insulin-like growth factor binding protein	CRIM1_DANRE;Cysteine-rich_motor_neuron_1_protein
HVAEP1_T002302.1	OG0005711	UFC1	ENSG00000143222	ubiquitin-fold modifier conjugating enzyme 1	NA	PTHR12921	UBIQUITIN-FOLD MODIFIER-CONJUGATING ENZYME 1	PF08694	Ubiquitin-fold modifier-conjugating enzyme 1	UFC1_TRIAD;Ubiquitin-fold_modifier-conjugating_enzyme_1
HVAEP1_T002303.1	NA	NA	NA	NA	NA	NA	NA	PF02822	Antistasin family	VP302_LYCMC;Venom_protein_302
HVAEP1_T002304.1	NA	NA	NA	NA	NA	NA	NA	PF02822	Antistasin family	VP302_LYCMC;Venom_protein_302
HVAEP1_T002307.1	NA	NA	NA	NA	NA	NA	NA	PF02822; PF00219	Antistasin family; Insulin-like growth factor binding protein	VP302_LYCMC;Venom_protein_302
HVAEP1_T002308.2	OG0005456	IFT81	ENSG00000122970	intraflagellar transport 81	NA	PTHR15614	INTRAFLAGELLAR TRANSPORT PROTEIN 81 HOMOLOG	PF18383	Intraflagellar transport 81 calponin homology domain	IFT81_RAT;Intraflagellar_transport_protein_81_homolog
HVAEP1_T002309.1	OG0003657	TLCD5	ENSG00000181264	TLC domain containing 5	NA	PTHR31898	TRANSMEMBRANE PROTEIN 136	PF03798	TLC domain	TLCD5_DANRE;TLC_domain-containing_protein_5
HVAEP1_T002310.1	OG0003657	TLCD5	ENSG00000181264	TLC domain containing 5	NA	PTHR31898	TRANSMEMBRANE PROTEIN 136	PF03798	TLC domain	TLCD5_BOVIN;TLC_domain-containing_protein_5
HVAEP1_T002311.1	OG0001543	RSPH1	ENSG00000160188	radial spoke head component 1	NA	NA	NA	PF02493	MORN repeat	RSPH1_MOUSE;Radial_spoke_head_1_homolog
HVAEP1_T002312.1	NA	NA	NA	NA	NA	PTHR46013	VASCULAR CELL ADHESION MOLECULE 1	PF07679	Immunoglobulin I-set domain	HMCN1_HUMAN;Hemicentin-1
HVAEP1_T002316.1	OG0000082	ankrd49, pcdhac2, exoc3l2, tmem62, c4a, lrp4, pcdh15, shmt2, MGC145518, c9orf64	ENSXETG00000037124, ENSXETG00000039347, ENSXETG00000039340, ENSXETG00000031841, ENSXETG00000039706, ENSXETG00000038082, ENSXETG00000031125, ENSXETG00000035631, ENSXETG00000032392, ENSXETG00000030274	uncharacterized protein MGC145244, , uncharacterized LOC100487738, chromosome 9 open reading frame 64, ankyrin repeat domain 49, uncharacterized protein MGC145518, uncharacterized LOC108644833	NA	PTHR31751	SI:CH211-108C17.2-RELATED-RELATED	NA	NA	NA
HVAEP1_T002319.1	OG0001925	CG2617	FBgn0032877	NA	NA	NA	NA	PF13920	Zinc finger, C3HC4 type (RING finger)	LUL3_ARATH;Probable_E3_ubiquitin-protein_ligase_LUL3
HVAEP1_T002320.1	OG0000937	MYPOP	ENSG00000176182	Myb related transcription factor, partner of profilin	NA	NA	NA	NA	NA	NA
HVAEP1_T002323.1	OG0000593	CG33099, CG33093, CG5346	FBgn0053099, FBgn0053093, FBgn0038981	NA	NA	PTHR47990:SF34	IRON/ASCORBATE OXIDOREDUCTASE DDB_G0283291-RELATED	PF03171; PF14226	2OG-Fe(II) oxygenase superfamily; non-haem dioxygenase in morphine synthesis N-terminal	ODD33_ORYSJ;2-oxoglutarate-dependent_dioxygenase_33
HVAEP1_T002324.2	OG0004043	EMSY	ENSG00000158636	EMSY transcriptional repressor, BRCA2 interacting	NA	PTHR16500	BRCA2-INTERACTING TRANSCRIPTIONAL REPRESSOR EMSY	PF03735; PF00439	ENT domain; Bromodomain	EMSY_HUMAN;BRCA2-interacting_transcriptional_repressor_EMSY
HVAEP1_T002325.1	NA	NA	NA	NA	NA	PTHR14149:SF17	GTPASE-ACTIVATING PROTEIN	PF03836; PF00616	RasGAP C-terminus; GTPase-activator protein for Ras-like GTPase	GAP1_SCHPO;GTPase-activating_protein
HVAEP1_T002326.1	OG0000042	CYP21A2, CYP21A2, CYP21A2, CYP21A2, CYP21A2, CYP21A2	ENSG00000198457, ENSG00000235134, ENSG00000206338, ENSG00000232414, ENSG00000233151, ENSG00000231852	cytochrome P450 family 21 subfamily A member 2	NA	NA	NA	PF00067	Cytochrome P450	CP17A_RANDY;Steroid_17-alpha-hydroxylase/17,20_lyase
HVAEP1_T002328.1	OG0000113	SRY	ENSG00000184895	sex determining region Y	NA	PTHR10270:SF305	SOX21A, ISOFORM B-RELATED	PF00505	HMG (high mobility group) box	SOX2_CHICK;Transcription_factor_SOX-2
HVAEP1_T002331.1	NA	NA	NA	NA	NA	PTHR10656:SF42	IP12463P	PF03281	Mab-21 protein	CGAS_NEMVE;Cyclic_GMP-AMP_synthase
HVAEP1_T002332.1	NA	NA	NA	NA	MK648244.1; icell1 (icell1)	NA	NA	NA	NA	NA
HVAEP1_T002334.1	OG0005596	MRPL17	ENSG00000158042	mitochondrial ribosomal protein L17	NA	NA	NA	PF01196	Ribosomal protein L17	RM17_MOUSE;39S_ribosomal_protein_L17,_mitochondrial
HVAEP1_T002335.1	OG0006605	PFDN2	ENSG00000143256	prefoldin subunit 2	NA	PTHR13303:SF0	PREFOLDIN SUBUNIT 2	PF01920	Prefoldin subunit	PFD2_BOVIN;Prefoldin_subunit_2
HVAEP1_T002338.2	OG0000576	ACSL4, ACSL3	ENSG00000068366, ENSG00000123983	acyl-CoA synthetase long chain family member 4, acyl-CoA synthetase long chain family member 3	NA	PTHR43272:SF13	LONG-CHAIN-FATTY-ACID--COA LIGASE 3	PF00501	AMP-binding enzyme	ACSL4_MOUSE;Long-chain-fatty-acid--CoA_ligase_4
HVAEP1_T002339.1	OG0001402	NDN, NDN, TRO, MAGED2, MAGED4B, MAGED4, MAGED1, MAGEL2, MAGEL2, NSMCE3, NSMCE3, MAGEF1, MAGEE1, MAGEB10, MAGEB5, MAGEB3, MAGEB4, MAGEB1, MAGEB2, MAGEB17, MAGEB6B, MAGEB6, MAGEB18, MAGEB16, MAGEA11, MAGEA9B, MAGEA9, MAGEA8, MAGEA3, MAGEA6, MAGEA2B, MAGEA2, MAGEA12, MAGEA4, MAGEA1, MAGEA10, MAGEC2, MAGEC3, MAGEC1	ENSG00000288364, ENSG00000182636, ENSG00000067445, ENSG00000102316, ENSG00000187243, ENSG00000154545, ENSG00000179222, ENSG00000288188, ENSG00000254585, ENSG00000282130, ENSG00000185115, ENSG00000177383, ENSG00000198934, ENSG00000177689, ENSG00000188408, ENSG00000198798, ENSG00000120289, ENSG00000214107, ENSG00000099399, ENSG00000182798, ENSG00000232030, ENSG00000176746, ENSG00000176774, ENSG0000…	NSE3 homolog, SMC5-SMC6 complex component, MAGE family member L2, necdin, MAGE family member, MAGE family member D2, MAGE family member B2, MAGE family member B4, trophinin, MAGE family member B17, MAGE family member B16, MAGE family member B10, MAGE family member D1, MAGE family member B18, , MAGE family member B6, MAGE family member B5, MAGE family member B1, MAGE family member B3, MAGE family …	NA	PTHR11736	MELANOMA-ASSOCIATED ANTIGEN MAGE ANTIGEN	PF01454	MAGE family	NSE3_HUMAN;Non-structural_maintenance_of_chromosomes_element_3_homolog
HVAEP1_T002340.1	NA	NA	NA	NA	NA	PTHR24083:SF87	NUCLEAR HORMONE RECEPTOR FAMILY	PF00104; PF00105	Ligand-binding domain of nuclear hormone receptor; Zinc finger, C4 type (two domains)	NR2E3_HUMAN;Photoreceptor-specific_nuclear_receptor
HVAEP1_T002341.1	OG0002883	FNDC3A, FNDC3B	ENSG00000102531, ENSG00000075420	fibronectin type III domain containing 3A, fibronectin type III domain containing 3B	NA	PTHR24099:SF11	FIBRONECTIN TYPE III DOMAIN-CONTAINING 3BA-RELATED	PF00041	Fibronectin type III domain	FND3A_PONAB;Fibronectin_type-III_domain-containing_protein_3A
HVAEP1_T002342.1	OG0000679	npp-9	WBGene00003795	Nuclear Pore complex Protein	NA	NA	NA	PF00638	RanBP1 domain	RANG_SCHPO;Ran-specific_GTPase-activating_protein_1
HVAEP1_T002343.1	OG0000679	npp-9	WBGene00003795	Nuclear Pore complex Protein	NA	NA	NA	NA	NA	NA
HVAEP1_T002344.1	OG0000679	npp-9	WBGene00003795	Nuclear Pore complex Protein	NA	PTHR23138:SF87	E3 SUMO-PROTEIN LIGASE RANBP2-RELATED	PF00638	RanBP1 domain	RBP2_MOUSE;E3_SUMO-protein_ligase_RanBP2
HVAEP1_T002345.1	OG0000679	npp-9	WBGene00003795	Nuclear Pore complex Protein	NA	NA	NA	PF00638	RanBP1 domain	NA
HVAEP1_T002346.1	OG0000679	npp-9	WBGene00003795	Nuclear Pore complex Protein	NA	NA	NA	PF00638	RanBP1 domain	RBP2_MOUSE;E3_SUMO-protein_ligase_RanBP2
HVAEP1_T002347.1	OG0000679	npp-9	WBGene00003795	Nuclear Pore complex Protein	NA	PTHR23138:SF87	E3 SUMO-PROTEIN LIGASE RANBP2-RELATED	PF00638	RanBP1 domain	RBP2_HUMAN;E3_SUMO-protein_ligase_RanBP2
HVAEP1_T002348.1	OG0000679	npp-9	WBGene00003795	Nuclear Pore complex Protein	NA	NA	NA	NA	NA	NA
HVAEP1_T002349.1	OG0000679	npp-9	WBGene00003795	Nuclear Pore complex Protein	NA	NA	NA	NA	NA	NA
HVAEP1_T002350.1	OG0000679	npp-9	WBGene00003795	Nuclear Pore complex Protein	NA	PTHR23138:SF87	E3 SUMO-PROTEIN LIGASE RANBP2-RELATED	PF00638	RanBP1 domain	RBP2_HUMAN;E3_SUMO-protein_ligase_RanBP2
HVAEP1_T002351.1	OG0000679	npp-9	WBGene00003795	Nuclear Pore complex Protein	NA	NA	NA	NA	NA	RBP2_HUMAN;E3_SUMO-protein_ligase_RanBP2
HVAEP1_T002352.1	OG0000679	npp-9	WBGene00003795	Nuclear Pore complex Protein	NA	PTHR23138:SF87	E3 SUMO-PROTEIN LIGASE RANBP2-RELATED	PF00638	RanBP1 domain	RBP2_PANTR;E3_SUMO-protein_ligase_RanBP2
HVAEP1_T002353.1	OG0000679	npp-9	WBGene00003795	Nuclear Pore complex Protein	NA	PTHR23138:SF87	E3 SUMO-PROTEIN LIGASE RANBP2-RELATED	PF00638	RanBP1 domain	RBP2_HUMAN;E3_SUMO-protein_ligase_RanBP2
HVAEP1_T002354.1	OG0000679	npp-9	WBGene00003795	Nuclear Pore complex Protein	NA	NA	NA	NA	NA	NA
HVAEP1_T002355.1	OG0000679	npp-9	WBGene00003795	Nuclear Pore complex Protein	NA	PTHR23138:SF87	E3 SUMO-PROTEIN LIGASE RANBP2-RELATED	PF00638	RanBP1 domain	RBP2_MOUSE;E3_SUMO-protein_ligase_RanBP2
HVAEP1_T002356.1	OG0000679	npp-9	WBGene00003795	Nuclear Pore complex Protein	NA	PTHR23138:SF87	E3 SUMO-PROTEIN LIGASE RANBP2-RELATED	PF00638	RanBP1 domain	RBP2_MOUSE;E3_SUMO-protein_ligase_RanBP2
HVAEP1_T002357.1	OG0000679	npp-9	WBGene00003795	Nuclear Pore complex Protein	NA	PTHR23138:SF87	E3 SUMO-PROTEIN LIGASE RANBP2-RELATED	PF00638	RanBP1 domain	RGPD4_HUMAN;RanBP2-like_and_GRIP_domain-containing_protein_4
HVAEP1_T002358.1	OG0000679	npp-9	WBGene00003795	Nuclear Pore complex Protein	NA	NA	NA	NA	NA	NA
HVAEP1_T002359.1	OG0000679	npp-9	WBGene00003795	Nuclear Pore complex Protein	NA	PTHR23138:SF87	E3 SUMO-PROTEIN LIGASE RANBP2-RELATED	PF00638	RanBP1 domain	RBP2_HUMAN;E3_SUMO-protein_ligase_RanBP2
HVAEP1_T002360.1	OG0000679	npp-9	WBGene00003795	Nuclear Pore complex Protein	NA	PTHR23138:SF87	E3 SUMO-PROTEIN LIGASE RANBP2-RELATED	PF00638	RanBP1 domain	RBP2_PANTR;E3_SUMO-protein_ligase_RanBP2
HVAEP1_T002361.1	OG0000679	npp-9	WBGene00003795	Nuclear Pore complex Protein	NA	NA	NA	NA	NA	NA
HVAEP1_T002362.1	OG0000679	npp-9	WBGene00003795	Nuclear Pore complex Protein	NA	PTHR23138:SF87	E3 SUMO-PROTEIN LIGASE RANBP2-RELATED	PF00638	RanBP1 domain	RBP2_HUMAN;E3_SUMO-protein_ligase_RanBP2
HVAEP1_T002363.1	OG0000679	npp-9	WBGene00003795	Nuclear Pore complex Protein	NA	PTHR23138:SF87	E3 SUMO-PROTEIN LIGASE RANBP2-RELATED	PF00638	RanBP1 domain	RGPD1_HUMAN;RANBP2-like_and_GRIP_domain-containing_protein_1
HVAEP1_T002364.1	OG0000679	npp-9	WBGene00003795	Nuclear Pore complex Protein	NA	PTHR23138:SF87	E3 SUMO-PROTEIN LIGASE RANBP2-RELATED	PF00638	RanBP1 domain	RBP2_HUMAN;E3_SUMO-protein_ligase_RanBP2
HVAEP1_T002365.1	OG0000679	npp-9	WBGene00003795	Nuclear Pore complex Protein	NA	NA	NA	PF00638	RanBP1 domain	NA
HVAEP1_T002366.1	OG0000679	npp-9	WBGene00003795	Nuclear Pore complex Protein	NA	NA	NA	NA	NA	NA
HVAEP1_T002367.1	OG0000679	npp-9	WBGene00003795	Nuclear Pore complex Protein	NA	NA	NA	NA	NA	NA
HVAEP1_T002368.1	OG0000679	npp-9	WBGene00003795	Nuclear Pore complex Protein	NA	PTHR23138:SF87	E3 SUMO-PROTEIN LIGASE RANBP2-RELATED	PF00638	RanBP1 domain	RBP2_MOUSE;E3_SUMO-protein_ligase_RanBP2
HVAEP1_T002369.1	NA	NA	NA	NA	NA	NA	NA	PF00628	PHD-finger	MSC1_SCHPO;Multicopy_suppressor_of_chk1_protein_1
HVAEP1_T002371.1	NA	NA	NA	NA	NA	PTHR31025:SF17	SI:CH211-196P9.1	NA	NA	NA
HVAEP1_T002372.1	NA	NA	NA	NA	NA	NA	NA	PF02017	CIDE-N domain	NA
HVAEP1_T002373.1	OG0000679	npp-9	WBGene00003795	Nuclear Pore complex Protein	NA	PTHR23138:SF87	E3 SUMO-PROTEIN LIGASE RANBP2-RELATED	PF00638; PF00641	RanBP1 domain; Zn-finger in Ran binding protein and others	RBP2_MOUSE;E3_SUMO-protein_ligase_RanBP2
HVAEP1_T002375.1	NA	NA	NA	NA	NA	NA	NA	NA	NA	ZBED4_HUMAN;Zinc_finger_BED_domain-containing_protein_4
HVAEP1_T002376.1	NA	NA	NA	NA	NA	NA	NA	PF05699	hAT family C-terminal dimerisation region	NA
HVAEP1_T002379.1	NA	NA	NA	NA	NA	NA	NA	PF13181	Tetratricopeptide repeat	RBP2_MOUSE;E3_SUMO-protein_ligase_RanBP2
HVAEP1_T002380.2	NA	NA	NA	NA	NA	PTHR33053:SF18	AGAP000105-PA	NA	NA	NA
HVAEP1_T002382.1	OG0003913	USF1, USF2	ENSG00000158773, ENSG00000105698	upstream transcription factor 2, c-fos interacting, upstream transcription factor 1	NA	PTHR46117:SF1	UPSTREAM STIMULATORY FACTOR 1	PF00010	Helix-loop-helix DNA-binding domain	USF2_HUMAN;Upstream_stimulatory_factor_2
HVAEP1_T002383.1	OG0002222	B3GALT6	ENSG00000176022	beta-1,3-galactosyltransferase 6	NA	PTHR11214:SF226	BETA-1,3-GALACTOSYLTRANSFERASE 6	PF01762	Galactosyltransferase	B3GT6_MOUSE;Beta-1,3-galactosyltransferase_6
HVAEP1_T002384.1	OG0006319	SAP130	ENSG00000136715	Sin3A associated protein 130	NA	PTHR13497	HISTONE DEACETYLASE COMPLEX SUBUNIT SAP130	PF16014	Histone deacetylase complex subunit SAP130 C-terminus	SP130_HUMAN;Histone_deacetylase_complex_subunit_SAP130
HVAEP1_T002385.1	NA	NA	NA	NA	NA	PTHR33444:SF2	SI:DKEY-19B23.12-RELATED	NA	NA	TM272_HUMAN;Transmembrane_protein_272
HVAEP1_T002391.1	OG0000199	HSPA9	ENSG00000113013	heat shock protein family A (Hsp70) member 9	NA	PTHR19375:SF451	HEAT SHOCK 70 KDA PROTEIN, MITOCHONDRIAL	PF00012	Hsp70 protein	GRP75_BOVIN;Stress-70_protein,_mitochondrial
HVAEP1_T002393.1	OG0000252	DAZL, DAZ3, DAZ2, DAZ1, DAZ4	ENSG00000092345, ENSG00000187191, ENSG00000205944, ENSG00000188120, ENSG00000205916	deleted in azoospermia 4, deleted in azoospermia 3, deleted in azoospermia 1, deleted in azoospermia 2, deleted in azoospermia like	NA	PTHR11176:SF14	PROTEIN BOULE	PF00076	RNA recognition motif. (a.k.a. RRM, RBD, or RNP domain)	BOLL_HUMAN;Protein_boule-like
HVAEP1_T002394.1	OG0003807	MSRA, MSRA	ENSG00000285250, ENSG00000175806	methionine sulfoxide reductase A	NA	PTHR42799:SF13	PEPTIDE METHIONINE SULFOXIDE REDUCTASE	PF01625	Peptide methionine sulfoxide reductase	MSRA_DROME;Peptide_methionine_sulfoxide_reductase
HVAEP1_T002395.1	OG0000602	FTH1, FTHL17, FTMT, FTL	ENSG00000167996, ENSG00000132446, ENSG00000181867, ENSG00000087086	ferritin heavy chain like 17, ferritin mitochondrial, ferritin light chain, ferritin heavy chain 1	NA	NA	NA	PF00210	Ferritin-like domain	FRIS_LYMST;Soma_ferritin
HVAEP1_T002398.1	OG0000602	FTH1, FTHL17, FTMT, FTL	ENSG00000167996, ENSG00000132446, ENSG00000181867, ENSG00000087086	ferritin heavy chain like 17, ferritin mitochondrial, ferritin light chain, ferritin heavy chain 1	NA	NA	NA	PF00210	Ferritin-like domain	FRIS_LYMST;Soma_ferritin
HVAEP1_T002399.1	OG0000602	FTH1, FTHL17, FTMT, FTL	ENSG00000167996, ENSG00000132446, ENSG00000181867, ENSG00000087086	ferritin heavy chain like 17, ferritin mitochondrial, ferritin light chain, ferritin heavy chain 1	DQ286043.1; ferritin	NA	NA	PF00210	Ferritin-like domain	FRIS_LYMST;Soma_ferritin
HVAEP1_T002400.1	OG0006080	PDCD10	ENSG00000114209	programmed cell death 10	NA	PTHR13250	TF-1 CELL APOPTOSIS RELATED PROTEIN-15	PF06840	Protein of unknown function (DUF1241)	PDC10_XENLA;Programmed_cell_death_protein_10
HVAEP1_T002401.1	NA	NA	NA	NA	NA	PTHR45641:SF1	TETRATRICOPEPTIDE REPEAT PROTEIN (AFU_ORTHOLOGUE AFUA_6G03870)	PF13374	Tetratricopeptide repeat	NA
HVAEP1_T002404.1	NA	NA	NA	NA	NA	NA	NA	PF13833	EF-hand domain pair	CDPKW_ARATH;Calcium-dependent_protein_kinase_32
HVAEP1_T002408.1	NA	NA	NA	NA	NA	NA	NA	PF02892	BED zinc finger	NA
HVAEP1_T002410.1	NA	NA	NA	NA	NA	NA	NA	PF13676	TIR domain	NA
HVAEP1_T002413.1	NA	NA	NA	NA	NA	NA	NA	NA	NA	ZBED1_HUMAN;E3_SUMO-protein_ligase_ZBED1
HVAEP1_T002414.1	NA	NA	NA	NA	NA	PTHR23064:SF54	EF HAND FAMILY PROTEIN	PF13499	EF-hand domain pair	CDPKB_ORYSJ;Calcium-dependent_protein_kinase_11
HVAEP1_T002416.1	OG0005432	ALG10, ALG10B	ENSG00000139133, ENSG00000175548	ALG10 alpha-1,2-glucosyltransferase, ALG10 alpha-1,2-glucosyltransferase B	NA	PTHR12989:SF10	DOL-P-GLC:GLC(2)MAN(9)GLCNAC(2)-PP-DOL ALPHA-1,2-GLUCOSYLTRANSFERASE-RELATED	PF04922	DIE2/ALG10 family	AG10B_RAT;Putative_Dol-P-Glc:Glc(2)Man(9)GlcNAc(2)-PP-Dol_alpha-1,2-glucosyltransferase
HVAEP1_T002417.2	NA	NA	NA	NA	NA	NA	NA	PF03184	DDE superfamily endonuclease	CLZ9_COCLU;MFS-type_transporter_clz9
HVAEP1_T002418.1	OG0004438	CCDC77	ENSG00000120647	coiled-coil domain containing 77	NA	PTHR22091	UNCHARACTERIZED	NA	NA	CCD77_XENLA;Coiled-coil_domain-containing_protein_77
HVAEP1_T002420.1	OG0000602	FTH1, FTHL17, FTMT, FTL	ENSG00000167996, ENSG00000132446, ENSG00000181867, ENSG00000087086	ferritin heavy chain like 17, ferritin mitochondrial, ferritin light chain, ferritin heavy chain 1	NA	NA	NA	PF00210	Ferritin-like domain	FRIS_LYMST;Soma_ferritin
HVAEP1_T002425.1	NA	NA	NA	NA	NA	NA	NA	PF16064	Domain of unknown function (DUF4806)	NA
HVAEP1_T002426.1	NA	NA	NA	NA	NA	PTHR33053:SF18	AGAP000105-PA	NA	NA	NA
HVAEP1_T002427.1	NA	NA	NA	NA	NA	NA	NA	PF00219; PF02822	Insulin-like growth factor binding protein; Antistasin family	VP302_LYCMC;Venom_protein_302
HVAEP1_T002428.1	NA	NA	NA	NA	NA	NA	NA	PF00219; PF02822	Insulin-like growth factor binding protein; Antistasin family	VP302_LYCMC;Venom_protein_302
HVAEP1_T002429.2	NA	NA	NA	NA	NA	PTHR24384:SF200	ZINC FINGER PROTEIN 977	PF00096	Zinc finger, C2H2 type	NA
HVAEP1_T002431.1	NA	NA	NA	NA	NA	PTHR45080:SF13	WRAPPER/REGA-1/KLINGON HOMOLOG	PF00090; PF07679; PF13927; PF07686	Thrombospondin type 1 domain; Immunoglobulin I-set domain; Immunoglobulin domain; Immunoglobulin V-set domain	HMCN1_HUMAN;Hemicentin-1
HVAEP1_T002434.1	NA	NA	NA	NA	NA	PTHR23022:SF106	TRANSPOSABLE ELEMENT TC1 TRANSPOSASE	PF01498	Transposase	TCB1_CAEBR;Transposable_element_Tcb1_transposase
HVAEP1_T002437.1	OG0005001	ALG3	ENSG00000214160	ALG3 alpha-1,3- mannosyltransferase	NA	PTHR12646:SF0	DOL-P-MAN:MAN(5)GLCNAC(2)-PP-DOL ALPHA-1,3-MANNOSYLTRANSFERASE	PF05208	ALG3 protein	ALG3_HUMAN;Dol-P-Man:Man(5)GlcNAc(2)-PP-Dol_alpha-1,3-mannosyltransferase
HVAEP1_T002438.3	OG0002885	INTS4	ENSG00000149262	integrator complex subunit 4	NA	PTHR20938	UNCHARACTERIZED	NA	NA	INT4_HUMAN;Integrator_complex_subunit_4
HVAEP1_T002439.1	OG0005597	NDUFAF1	ENSG00000137806	NADH:ubiquinone oxidoreductase complex assembly factor 1	NA	PTHR13194:SF18	COMPLEX I INTERMEDIATE-ASSOCIATED PROTEIN 30, MITOCHONDRIAL	PF08547	Complex I intermediate-associated protein 30 (CIA30)	CIA30_DROME;Complex_I_intermediate-associated_protein_30,_mitochondrial
HVAEP1_T002440.1	OG0006275	TRAPPC1	ENSG00000170043	trafficking protein particle complex subunit 1	NA	PTHR23249:SF16	TRAFFICKING PROTEIN PARTICLE COMPLEX SUBUNIT 1	PF04099	Sybindin-like family	TPPC1_MOUSE;Trafficking_protein_particle_complex_subunit_1
HVAEP1_T002441.1	NA	NA	NA	NA	NA	PTHR17695	UNCHARACTERIZED	PF07539	Down-regulated in metastasis	UTP20_HUMAN;Small_subunit_processome_component_20_homolog
HVAEP1_T002442.1	OG0000651	MS4A8	ENSG00000166959	membrane spanning 4-domains A8	NA	PTHR23320:SF95	SI:CH1073-291C23.2	PF04103	CD20-like family	M4A8_MOUSE;Membrane-spanning_4-domains_subfamily_A_member_8
HVAEP1_T002445.1	OG0004231	MAEL	ENSG00000143194	maelstrom spermatogenic transposon silencer	AB840995.1; maelstrom-like protein	PTHR21358	PROTEIN MAELSTROM HOMOLOG	PF09011; PF13017	HMG-box domain; piRNA pathway germ-plasm component	MAEL_XENTR;Protein_maelstrom_homolog
HVAEP1_T002447.1	NA	NA	NA	NA	NA	PTHR23080:SF63	ZGC:113019	PF13613; PF05485; PF13359	Helix-turn-helix of DDE superfamily endonuclease; THAP domain; DDE superfamily endonuclease	NA
HVAEP1_T002448.1	OG0000007	ZMYM1	ENSG00000197056	zinc finger MYM-type containing 1	NA	NA	NA	NA	NA	NA
HVAEP1_T002450.1	OG0000002	T16H12.13	WBGene00194725	hypothetical protein	NA	PTHR22955:SF60	PROTEIN CBG26950	NA	NA	NA
HVAEP1_T002457.2	OG0004700	MPI	ENSG00000178802	mannose phosphate isomerase	NA	PTHR10309	MANNOSE-6-PHOSPHATE ISOMERASE	PF01238	Phosphomannose isomerase type I	MPI_RAT;Mannose-6-phosphate_isomerase
HVAEP1_T002458.1	OG0006246	B3GNTL1, B3GNTL1	ENSG00000277033, ENSG00000175711	UDP-GlcNAc:betaGal beta-1,3-N-acetylglucosaminyltransferase like 1	NA	PTHR22916:SF68	UDP-GLCNAC:BETAGAL BETA-1,3-N-ACETYLGLUCOSAMINYLTRANSFERASE-LIKE PROTEIN 1	PF00535	Glycosyl transferase family 2	B3GNL_RAT;UDP-GlcNAc:betaGal_beta-1,3-N-acetylglucosaminyltransferase-like_protein_1
HVAEP1_T002459.1	OG0004636	NELFA	ENSG00000185049	negative elongation factor complex member A	NA	NA	NA	NA	NA	NELFA_MOUSE;Negative_elongation_factor_A
HVAEP1_T002460.2	OG0001986	K08B12.1, C14E2.6, H41C03.2, Y46H3A.5, Y49E10.25, Y49E10.16, Y49E10.18, Y51H4A.5, C39B5.14, K03H6.2, Y54G2A.45, C40H1.7, C40H1.8, C40H1.2, C40H1.9, F58B6.1, T10B5.7, B0035.13, F28H7.3, F25A2.1, T21H3.1, F46G10.4, ZK262.2, ZK262.3, Y51A2B.4, T08B1.4, Y110A7A.7	WBGene00019520, WBGene00015775, WBGene00019269, WBGene00021601, WBGene00013044, WBGene00013035, WBGene00013037, WBGene00013101, WBGene00189950, WBGene00019368, WBGene00044488, WBGene00008042, WBGene00008043, WBGene00008038, WBGene00008044, WBGene00019029, WBGene00020393, WBGene00007112, WBGene00009237, WBGene00017764, WBGene00020662, WBGene00009798, WBGene00013949, WBGene00013950, WBGene00013068,…	hypothetical protein, Lipase ZK262.3	NA	PTHR45908	PROTEIN CBG11750-RELATED	PF01764	Lipase (class 3)	LIP_RHIMI;Lipase
HVAEP1_T002461.1	OG0001986	K08B12.1, C14E2.6, H41C03.2, Y46H3A.5, Y49E10.25, Y49E10.16, Y49E10.18, Y51H4A.5, C39B5.14, K03H6.2, Y54G2A.45, C40H1.7, C40H1.8, C40H1.2, C40H1.9, F58B6.1, T10B5.7, B0035.13, F28H7.3, F25A2.1, T21H3.1, F46G10.4, ZK262.2, ZK262.3, Y51A2B.4, T08B1.4, Y110A7A.7	WBGene00019520, WBGene00015775, WBGene00019269, WBGene00021601, WBGene00013044, WBGene00013035, WBGene00013037, WBGene00013101, WBGene00189950, WBGene00019368, WBGene00044488, WBGene00008042, WBGene00008043, WBGene00008038, WBGene00008044, WBGene00019029, WBGene00020393, WBGene00007112, WBGene00009237, WBGene00017764, WBGene00020662, WBGene00009798, WBGene00013949, WBGene00013950, WBGene00013068,…	hypothetical protein, Lipase ZK262.3	NA	PTHR45908	PROTEIN CBG11750-RELATED	PF01764	Lipase (class 3)	LIP_RHIMI;Lipase
HVAEP1_T002464.1	NA	NA	NA	NA	NA	PTHR10773:SF12	DNA-DIRECTED RNA POLYMERASES I, II, AND III SUBUNIT RPABC2	NA	NA	NA
HVAEP1_T002469.1	NA	NA	NA	NA	NA	NA	NA	PF00090	Thrombospondin type 1 domain	SSPO_BOVIN;SCO-spondin
HVAEP1_T002470.1	OG0000007	ZMYM1	ENSG00000197056	zinc finger MYM-type containing 1	NA	NA	NA	NA	NA	NA
HVAEP1_T002474.1	NA	NA	NA	NA	NA	PTHR46481	ZINC FINGER BED DOMAIN-CONTAINING PROTEIN 4	NA	NA	TRA1_MAIZE;Putative_AC_transposase
HVAEP1_T002480.1	OG0000695	GGH	ENSG00000137563	gamma-glutamyl hydrolase	NA	PTHR11315	PROTEASE FAMILY C26 GAMMA-GLUTAMYL HYDROLASE	PF07722	Peptidase C26	GGH_MOUSE;Gamma-glutamyl_hydrolase
HVAEP1_T002483.1	OG0004215	T07E3.3	WBGene00020314	hypothetical protein	NA	PTHR42943	GLUTATHIONE S-TRANSFERASE KAPPA	PF01323	DSBA-like thioredoxin domain	NSAD_SPHXE;2-hydroxychromene-2-carboxylate_isomerase
HVAEP1_T002484.1	NA	NA	NA	NA	NA	PTHR24060:SF158	METABOTROPIC GLUTAMATE RECEPTOR	PF00003; PF01094	7 transmembrane sweet-taste receptor of 3 GCPR; Receptor family ligand binding region	GRM3_HUMAN;Metabotropic_glutamate_receptor_3
HVAEP1_T002485.1	OG0005157	LAS1L	ENSG00000001497	LAS1 like ribosome biogenesis factor	NA	PTHR15002	UNCHARACTERIZED	PF04031	Las1-like	LAS1L_HUMAN;Ribosomal_biogenesis_protein_LAS1L
HVAEP1_T002488.2	NA	NA	NA	NA	NA	PTHR31025:SF17	SI:CH211-196P9.1	NA	NA	NA
HVAEP1_T002489.1	NA	NA	NA	NA	NA	PTHR10270:SF304	TRANSCRIPTION FACTOR SOX-14-RELATED	PF00505	HMG (high mobility group) box	SOX3_CAEEL;Transcription_factor_sox-3
HVAEP1_T002490.1	OG0002884	INTS6L, INTS6	ENSG00000165359, ENSG00000102786	integrator complex subunit 6, integrator complex subunit 6 like	NA	PTHR12957	DEAD/H BOX POLYPEPTIDE 26/DICE1-RELATED	PF13519	von Willebrand factor type A domain	INT6_DANRE;Integrator_complex_subunit_6
HVAEP1_T002491.2	OG0000728	DOCK10, DOCK9, DOCK11	ENSG00000135905, ENSG00000088387, ENSG00000147251	dedicator of cytokinesis 9, dedicator of cytokinesis 11, dedicator of cytokinesis 10	NA	PTHR23317:SF77	DEDICATOR OF CYTOKINESIS PROTEIN 9	PF14429; PF00169; PF06920; PF11878	C2 domain in Dock180 and Zizimin proteins; PH domain; Dock homology region 2; Domain of unknown function (DUF3398)	DOCK9_MOUSE;Dedicator_of_cytokinesis_protein_9
HVAEP1_T002492.1	OG0006299	TXNDC15	ENSG00000113621	thioredoxin domain containing 15	NA	PTHR14684	UNCHARACTERIZED	PF00085	Thioredoxin	TXD15_RAT;Thioredoxin_domain-containing_protein_15
HVAEP1_T002493.1	NA	NA	NA	NA	NA	PTHR10404	N-ACETYLATED-ALPHA-LINKED ACIDIC DIPEPTIDASE	PF04389; PF02225; PF04253	Peptidase family M28; PA domain; Transferrin receptor-like dimerisation domain	FOLH1_HUMAN;Glutamate_carboxypeptidase_2
HVAEP1_T002495.1	NA	NA	NA	NA	NA	NA	NA	NA	NA	AL14E_BOVIN;ARL14_effector_protein
HVAEP1_T002496.1	NA	NA	NA	NA	NA	PTHR10404	N-ACETYLATED-ALPHA-LINKED ACIDIC DIPEPTIDASE	PF04253; PF04389	Transferrin receptor-like dimerisation domain; Peptidase family M28	FOLH1_HUMAN;Glutamate_carboxypeptidase_2
HVAEP1_T002498.1	NA	NA	NA	NA	NA	PTHR11576	ZONA PELLUCIDA SPERM-BINDING PROTEIN 3	PF00219; PF07648; PF00100	Insulin-like growth factor binding protein; Kazal-type serine protease inhibitor domain; Zona pellucida-like domain	VP302_LYCMC;Venom_protein_302
HVAEP1_T002499.1	NA	NA	NA	NA	NA	PTHR34153:SF8	SI:DKEY-65L23.2	NA	NA	NA
HVAEP1_T002501.1	OG0004535	UPF3A, UPF3B	ENSG00000169062, ENSG00000125351	UPF3A regulator of nonsense mediated mRNA decay, UPF3B regulator of nonsense mediated mRNA decay	NA	PTHR13112:SF0	FI21285P1	PF03467	Smg-4/UPF3 family	REN3B_HUMAN;Regulator_of_nonsense_transcripts_3B
HVAEP1_T002502.1	OG0005049	ANAPC5	ENSG00000089053	anaphase promoting complex subunit 5	NA	PTHR12830	ANAPHASE-PROMOTING COMPLEX SUBUNIT 5	PF12862	Anaphase-promoting complex subunit 5	APC5_MOUSE;Anaphase-promoting_complex_subunit_5
HVAEP1_T002503.1	OG0003572	Vha68-1, Vha68-2	FBgn0265262, FBgn0263598	NA	NA	PTHR43607	V-TYPE PROTON ATPASE CATALYTIC SUBUNIT A	PF16886; PF00006; PF02874	ATPsynthase alpha/beta subunit N-term extension; ATP synthase alpha/beta family, nucleotide-binding domain; ATP synthase alpha/beta family, beta-barrel domain	VATA_ANOGA;V-type_proton_ATPase_catalytic_subunit_A
HVAEP1_T002504.1	OG0000706	TMTC4	ENSG00000125247	transmembrane O-mannosyltransferase targeting cadherins 4	NA	NA	NA	PF00515; PF13414; PF08409	Tetratricopeptide repeat; TPR repeat; Domain of unknown function (DUF1736)	TMTC4_HUMAN;Protein_O-mannosyl-transferase_TMTC4
HVAEP1_T002505.1	OG0004217	IFT46	ENSG00000118096	intraflagellar transport 46	NA	PTHR13376	UNCHARACTERIZED	PF12317	Intraflagellar transport complex B protein 46 C terminal	IFT46_DANRE;Intraflagellar_transport_protein_46_homolog
HVAEP1_T002508.1	NA	NA	NA	NA	NA	PTHR22978	B-CELL TRANSLOCATION GENE	PF07742	BTG family	BTG1_CHICK;Protein_BTG1
HVAEP1_T002510.1	OG0000007	ZMYM1	ENSG00000197056	zinc finger MYM-type containing 1	NA	NA	NA	PF14291	Domain of unknown function (DUF4371)	ZMYM1_HUMAN;Zinc_finger_MYM-type_protein_1
HVAEP1_T002511.1	NA	NA	NA	NA	NA	NA	NA	PF13374	Tetratricopeptide repeat	NA
HVAEP1_T002513.1	OG0001301	DPP7	ENSG00000176978	dipeptidyl peptidase 7	NA	PTHR11010:SF97	LYSOSOMAL PRO-X CARBOXYPEPTIDASE	PF05577	Serine carboxypeptidase S28	DPP2_MOUSE;Dipeptidyl_peptidase_2
HVAEP1_T002514.1	OG0006916	CASQ1, CASQ2	ENSG00000143318, ENSG00000118729	calsequestrin 1, calsequestrin 2	NA	PTHR10033:SF15	CALSEQUESTRIN-2	PF01216	Calsequestrin	CASQ2_HUMAN;Calsequestrin-2
HVAEP1_T002515.1	OG0000007	ZMYM1	ENSG00000197056	zinc finger MYM-type containing 1	NA	NA	NA	NA	NA	NA
HVAEP1_T002516.1	NA	NA	NA	NA	NA	PTHR11537:SF254	POTASSIUM VOLTAGE-GATED CHANNEL PROTEIN SHAB	PF07885	Ion channel	TVOK_THEVO;Calcium-gated_potassium_channel_TvoK
HVAEP1_T002518.1	OG0001199	NME7	ENSG00000143156	NME/NM23 family member 7	NA	PTHR43109	NUCLEOSIDE DIPHOSPHATE KINASE 7	PF00334	Nucleoside diphosphate kinase	NDK7_HUMAN;Nucleoside_diphosphate_kinase_7
HVAEP1_T002519.1	OG0000049	ppk17	FBgn0032602	NA	NA	NA	NA	PF00858	Amiloride-sensitive sodium channel	ASIC5_HUMAN;Acid-sensing_ion_channel_5
HVAEP1_T002520.2	OG0000049	ppk17	FBgn0032602	NA	NA	NA	NA	PF00858	Amiloride-sensitive sodium channel	ASIC5_MOUSE;Acid-sensing_ion_channel_5
HVAEP1_T002527.2	NA	NA	NA	NA	NA	NA	NA	PF07679; PF00041	Immunoglobulin I-set domain; Fibronectin type III domain	NCAM2_HUMAN;Neural_cell_adhesion_molecule_2
HVAEP1_T002529.1	NA	NA	NA	NA	NA	PTHR11537:SF254	POTASSIUM VOLTAGE-GATED CHANNEL PROTEIN SHAB	PF07885	Ion channel	TVOK_THEVO;Calcium-gated_potassium_channel_TvoK
HVAEP1_T002532.1	NA	NA	NA	NA	NA	NA	NA	PF00060; PF07885	Ligand-gated ion channel; Ion channel	KCNQ4_HUMAN;Potassium_voltage-gated_channel_subfamily_KQT_member_4
HVAEP1_T002533.1	NA	NA	NA	NA	NA	PTHR12420:SF31	RAB6A, MEMBER RAS ONCOGENE FAMILY-RELATED	PF07885	Ion channel	MJK2_METJA;Probable_potassium_channel_protein_2
HVAEP1_T002535.1	NA	NA	NA	NA	NA	NA	NA	PF05225; PF03184	helix-turn-helix, Psq domain; DDE superfamily endonuclease	JERKL_HUMAN;Jerky_protein_homolog-like
HVAEP1_T002536.1	NA	NA	NA	NA	NA	PTHR11537:SF254	POTASSIUM VOLTAGE-GATED CHANNEL PROTEIN SHAB	PF07885	Ion channel	KCNAW_DROME;Potassium_voltage-gated_channel_protein_Shaw
HVAEP1_T002537.1	NA	NA	NA	NA	NA	PTHR12420:SF31	RAB6A, MEMBER RAS ONCOGENE FAMILY-RELATED	PF07885	Ion channel	KCNAW_DROME;Potassium_voltage-gated_channel_protein_Shaw
HVAEP1_T002538.1	OG0000264	CAPN5, CAPN6	ENSG00000149260, ENSG00000077274	calpain 6, calpain 5	NA	PTHR10183:SF381	CALPAIN-6	PF00168; PF01067; PF00648	C2 domain; Calpain large subunit, domain III; Calpain family cysteine protease	CAN5_HUMAN;Calpain-5
HVAEP1_T002539.4	OG0000264	CAPN5, CAPN6	ENSG00000149260, ENSG00000077274	calpain 6, calpain 5	NA	PTHR10183:SF381	CALPAIN-6	PF00168; PF01067; PF00648	C2 domain; Calpain large subunit, domain III; Calpain family cysteine protease	CAN5_MOUSE;Calpain-5
HVAEP1_T002540.2	NA	NA	NA	NA	NA	NA	NA	PF01549	ShK domain-like	NA
HVAEP1_T002542.2	OG0005206	MED4	ENSG00000136146	mediator complex subunit 4	NA	PTHR13208	MEDIATOR OF RNA POLYMERASE II TRANSCRIPTION SUBUNIT 4	PF10018	Vitamin-D-receptor interacting Mediator subunit 4	MED4_RAT;Mediator_of_RNA_polymerase_II_transcription_subunit_4
HVAEP1_T002543.1	NA	NA	NA	NA	NA	PTHR46289:SF3	52 KDA REPRESSOR OF THE INHIBITOR OF THE PROTEIN KINASE-LIKE PROTEIN	NA	NA	NA
HVAEP1_T002544.1	NA	NA	NA	NA	NA	NA	NA	PF14291	Domain of unknown function (DUF4371)	NA
HVAEP1_T002546.1	NA	NA	NA	NA	NA	NA	NA	PF13424	Tetratricopeptide repeat	NA
HVAEP1_T002547.1	OG0006935	SELENOS	ENSG00000131871	selenoprotein S	NA	PTHR28621	SELENOPROTEIN S	PF06936	Selenoprotein S (SelS)	SELS_RAT;Selenoprotein_S
HVAEP1_T002548.2	OG0001709	VPS37A	ENSG00000155975	VPS37A subunit of ESCRT-I	NA	NA	NA	PF07200	Modifier of rudimentary (Mod(r)) protein	VP37A_HUMAN;Vacuolar_protein_sorting-associated_protein_37A
HVAEP1_T002549.1	OG0002179	POLR2J, POLR2J3, POLR2J2	ENSG00000005075, ENSG00000285437, ENSG00000228049	RNA polymerase II subunit J, RNA polymerase II subunit J2, RNA polymerase II subunit J3	NA	PTHR13946:SF31	DNA-DIRECTED RNA POLYMERASE II SUBUNIT RPB11-A-RELATED	PF13656	RNA polymerase Rpb3/Rpb11 dimerisation domain	RPB11_MOUSE;DNA-directed_RNA_polymerase_II_subunit_RPB11
HVAEP1_T002550.1	OG0006007	PIN4	ENSG00000102309	peptidylprolyl cis/trans isomerase, NIMA-interacting 4	NA	PTHR45995:SF2	PEPTIDYL-PROLYL CIS-TRANS ISOMERASE NIMA-INTERACTING 4	PF13616	PPIC-type PPIASE domain	PIN4_XENTR;Peptidyl-prolyl_cis-trans_isomerase_NIMA-interacting_4
HVAEP1_T002551.1	OG0006779	GPALPP1	ENSG00000133114	GPALPP motifs containing 1	NA	PTHR46370	GPALPP MOTIFS-CONTAINING PROTEIN 1	PF12572	Protein of unknown function (DUF3752)	GPAM1_HUMAN;GPALPP_motifs-containing_protein_1
HVAEP1_T002552.2	OG0005919	RNASEH2B	ENSG00000136104	ribonuclease H2 subunit B	NA	PTHR13383	RIBONUCLEASE H2 SUBUNIT B	PF09468; PF17745	Ydr279p protein family (RNase H2 complex component) wHTH domain; Ydr279p protein triple barrel domain	RNH2B_XENTR;Ribonuclease_H2_subunit_B
HVAEP1_T002553.1	OG0000879	fzy-1	WBGene00001511	WD repeat-containing protein fzy-1	NA	PTHR19918:SF3	CELL DIVISION CYCLE PROTEIN 20 HOMOLOG	PF12894; PF00400	Anaphase-promoting complex subunit 4 WD40 domain; WD domain, G-beta repeat	CDC20_HUMAN;Cell_division_cycle_protein_20_homolog
HVAEP1_T002555.1	NA	NA	NA	NA	NA	PTHR46289:SF3	52 KDA REPRESSOR OF THE INHIBITOR OF THE PROTEIN KINASE-LIKE PROTEIN	NA	NA	NA
HVAEP1_T002557.1	NA	NA	NA	NA	NA	NA	NA	PF13424	Tetratricopeptide repeat	NA
HVAEP1_T002558.1	NA	NA	NA	NA	NA	NA	NA	PF13424	Tetratricopeptide repeat	NA
HVAEP1_T002559.1	NA	NA	NA	NA	NA	PTHR45641:SF1	TETRATRICOPEPTIDE REPEAT PROTEIN (AFU_ORTHOLOGUE AFUA_6G03870)	PF13424	Tetratricopeptide repeat	NA
HVAEP1_T002560.1	NA	NA	NA	NA	NA	NA	NA	PF00531	Death domain	NA
HVAEP1_T002566.1	NA	NA	NA	NA	NA	NA	NA	PF05225	helix-turn-helix, Psq domain	NA
HVAEP1_T002567.1	NA	NA	NA	NA	NA	NA	NA	PF13374	Tetratricopeptide repeat	NA
HVAEP1_T002573.1	NA	NA	NA	NA	NA	PTHR46082:SF6	ATP/GTP-BINDING PROTEIN-RELATED	PF13424	Tetratricopeptide repeat	NA
HVAEP1_T002574.2	OG0005035	COPS6	ENSG00000168090	COP9 signalosome subunit 6	NA	PTHR10540:SF8	COP9 SIGNALOSOME COMPLEX SUBUNIT 6	NA	NA	CSN6_XENLA;COP9_signalosome_complex_subunit_6
HVAEP1_T002575.4	NA	NA	NA	NA	NA	PTHR45641:SF1	TETRATRICOPEPTIDE REPEAT PROTEIN (AFU_ORTHOLOGUE AFUA_6G03870)	PF13374	Tetratricopeptide repeat	NA
HVAEP1_T002576.1	NA	NA	NA	NA	NA	NA	NA	PF10545	Alcohol dehydrogenase transcription factor Myb/SANT-like	NA
HVAEP1_T002578.1	NA	NA	NA	NA	NA	PTHR45783:SF3	KINESIN LIGHT CHAIN	PF13424	Tetratricopeptide repeat	NA
HVAEP1_T002580.1	OG0005035	COPS6	ENSG00000168090	COP9 signalosome subunit 6	NA	PTHR10540:SF8	COP9 SIGNALOSOME COMPLEX SUBUNIT 6	PF01398; PF13012	JAB1/Mov34/MPN/PAD-1 ubiquitin protease; Maintenance of mitochondrial structure and function	CSN6_BOVIN;COP9_signalosome_complex_subunit_6
HVAEP1_T002581.1	NA	NA	NA	NA	NA	PTHR12619:SF25	TRANSCRIPTION FACTOR RFX4	PF02257	RFX DNA-binding domain	RFX4_HUMAN;Transcription_factor_RFX4
HVAEP1_T002582.1	OG0005035	COPS6	ENSG00000168090	COP9 signalosome subunit 6	NA	PTHR10540:SF8	COP9 SIGNALOSOME COMPLEX SUBUNIT 6	PF13012	Maintenance of mitochondrial structure and function	CSN6_XENLA;COP9_signalosome_complex_subunit_6
HVAEP1_T002583.1	NA	NA	NA	NA	NA	PTHR12619:SF25	TRANSCRIPTION FACTOR RFX4	NA	NA	RFX4_HUMAN;Transcription_factor_RFX4
HVAEP1_T002584.1	OG0003894	CEP162	ENSG00000135315	centrosomal protein 162	NA	PTHR34031	CENTROSOMAL PROTEIN OF 162 KDA	NA	NA	CE162_HUMAN;Centrosomal_protein_of_162_kDa
HVAEP1_T002585.1	OG0005664	mrpl-2	WBGene00018932	Mitochondrial Ribosomal Protein, Large	NA	PTHR13691:SF16	60S RIBOSOMAL PROTEIN L8	PF03947	Ribosomal Proteins L2, C-terminal domain	RL8_ANOGA;60S_ribosomal_protein_L8
HVAEP1_T002586.1	OG0004244	RPL8	ENSG00000161016	ribosomal protein L8	NA	PTHR13691:SF16	60S RIBOSOMAL PROTEIN L8	PF03947; PF00181	Ribosomal Proteins L2, C-terminal domain; Ribosomal Proteins L2, RNA binding domain	RL8_BOVIN;60S_ribosomal_protein_L8
HVAEP1_T002587.1	NA	NA	NA	NA	NA	NA	NA	PF00531	Death domain	NA
HVAEP1_T002589.1	NA	NA	NA	NA	NA	PTHR45641:SF1	TETRATRICOPEPTIDE REPEAT PROTEIN (AFU_ORTHOLOGUE AFUA_6G03870)	PF13374	Tetratricopeptide repeat	NA
HVAEP1_T002590.2	OG0000007	ZMYM1	ENSG00000197056	zinc finger MYM-type containing 1	NA	PTHR45749:SF11	AC-LIKE TRANSPOSASE-RELATED	PF14291	Domain of unknown function (DUF4371)	ZMYM1_HUMAN;Zinc_finger_MYM-type_protein_1
HVAEP1_T002591.1	OG0001622	TBL1Y, TBL1X, TBL1XR1	ENSG00000092377, ENSG00000101849, ENSG00000177565	transducin beta like 1 Y-linked, transducin beta like 1 X-linked, TBL1X receptor 1	NA	PTHR22846	WD40 REPEAT PROTEIN	PF12894; PF00400; PF08513	Anaphase-promoting complex subunit 4 WD40 domain; WD domain, G-beta repeat; LisH	TBL1R_MOUSE;F-box-like/WD_repeat-containing_protein_TBL1XR1
HVAEP1_T002592.1	NA	NA	NA	NA	NA	NA	NA	PF05699	hAT family C-terminal dimerisation region	NA
HVAEP1_T002595.1	OG0000012	MSX1, MSX2	ENSG00000163132, ENSG00000120149	msh homeobox 1, msh homeobox 2	AJ271008.1; msh homeoprotein (msh gene)	PTHR24338:SF0	MUSCLE SEGMENTATION HOMEOBOX	PF00046	Homeodomain	VAB15_CAEEL;Homeobox_protein_vab-15
HVAEP1_T002596.1	NA	NA	NA	NA	NA	PTHR19969:SF14	DREADLOCKS, ISOFORM B	PF00017; PF14604; PF00018	SH2 domain; Variant SH3 domain; SH3 domain	NCK2_HUMAN;Cytoplasmic_protein_NCK2
HVAEP1_T002598.1	OG0003896	RANBP6, IPO5	ENSG00000137040, ENSG00000065150	importin 5, RAN binding protein 6	NA	PTHR10527:SF22	IMPORTIN-5	PF18816; PF13513; PF18829; PF02985	Importin repeat; HEAT-like repeat; Importin repeat 6; HEAT repeat	IPO5_MOUSE;Importin-5
HVAEP1_T002600.2	NA	NA	NA	NA	NA	PTHR31964:SF126	ADENINE NUCLEOTIDE ALPHA HYDROLASES-LIKE SUPERFAMILY PROTEIN	PF00582	Universal stress protein family	Y1101_SYNY3;Universal_stress_protein_Slr1101
HVAEP1_T002601.1	NA	NA	NA	NA	NA	NA	NA	PF00078	Reverse transcriptase (RNA-dependent DNA polymerase)	RTJK_DROME;RNA-directed_DNA_polymerase_from_mobile_element_jockey
HVAEP1_T002602.1	NA	NA	NA	NA	NA	PTHR33395	TRANSCRIPTASE, PUTATIVE-RELATED-RELATED	NA	NA	NA
HVAEP1_T002603.1	NA	NA	NA	NA	NA	NA	NA	PF13424	Tetratricopeptide repeat	NA
HVAEP1_T002608.1	NA	NA	NA	NA	NA	PTHR11537:SF254	POTASSIUM VOLTAGE-GATED CHANNEL PROTEIN SHAB	PF07885	Ion channel	KCNQ4_HUMAN;Potassium_voltage-gated_channel_subfamily_KQT_member_4
HVAEP1_T002609.1	OG0001310	SRPRA	ENSG00000182934	SRP receptor subunit alpha	NA	PTHR43134:SF1	SIGNAL RECOGNITION PARTICLE RECEPTOR SUBUNIT ALPHA	PF00448; PF04086; PF02881	SRP54-type protein, GTPase domain; Signal recognition particle, alpha subunit, N-terminal; SRP54-type protein, helical bundle domain	SRPRA_DROME;Signal_recognition_particle_receptor_subunit_alpha_homolog
HVAEP1_T002610.1	NA	NA	NA	NA	NA	PTHR11733:SF216	NEPRILYSIN-1	PF05649	Peptidase family M13	ECE2_HUMAN;Endothelin-converting_enzyme_2
HVAEP1_T002612.1	OG0001186	RAB41	ENSG00000147127	RAB41, member RAS oncogene family	NA	PTHR24073:SF1122	RAB6B, MEMBER RAS ONCOGENE FAMILY B	PF00071	Ras family	RAB6_DROME;Ras-related_protein_Rab6
HVAEP1_T002613.1	OG0005863	ATG3	ENSG00000144848	autophagy related 3	NA	PTHR12866	UBIQUITIN-LIKE-CONJUGATING ENZYME ATG3	PF03987	Autophagocytosis associated protein, active-site domain	ATG3_XENLA;Ubiquitin-like-conjugating_enzyme_ATG3
HVAEP1_T002614.1	OG0004556	HYOU1, HYOU1	ENSG00000280682, ENSG00000149428	hypoxia up-regulated 1	NA	PTHR45639:SF3	HYPOXIA UP-REGULATED PROTEIN 1	PF00012	Hsp70 protein	HYOU1_DANRE;Hypoxia_up-regulated_protein_1
HVAEP1_T002615.1	OG0004555	EIF3F	ENSG00000175390	eukaryotic translation initiation factor 3 subunit F	NA	PTHR10540:SF6	EUKARYOTIC TRANSLATION INITIATION FACTOR 3 SUBUNIT F	PF01398; PF13012	JAB1/Mov34/MPN/PAD-1 ubiquitin protease; Maintenance of mitochondrial structure and function	EIF3F_HUMAN;Eukaryotic_translation_initiation_factor_3_subunit_F
HVAEP1_T002616.1	OG0002664	Cks85A	FBgn0037613	NA	NA	PTHR23415:SF29	CYCLIN-DEPENDENT KINASES REGULATORY SUBUNIT	PF01111	Cyclin-dependent kinase regulatory subunit	CKS1_BOVIN;Cyclin-dependent_kinases_regulatory_subunit_1
HVAEP1_T002624.1	NA	NA	NA	NA	NA	NA	NA	PF00519	Papillomavirus helicase	NA
HVAEP1_T002637.1	OG0008777	-P, -Z	FBgn0266175, FBgn0261838	NA	NA	NA	NA	NA	NA	NA
HVAEP1_T002638.1	NA	NA	NA	NA	NA	NA	NA	PF16087	Helix-turn-helix domain (DUF4817)	NA
HVAEP1_T002642.1	OG0000912	OTOP1, OTOP3, OTOP2	ENSG00000163982, ENSG00000182938, ENSG00000183034	otopetrin 1, otopetrin 2, otopetrin 3	NA	PTHR21522:SF32	PROTON CHANNEL OTOPLC	PF03189	Otopetrin	NA
HVAEP1_T002647.1	NA	NA	NA	NA	NA	NA	NA	PF13020	Domain of unknown function (DUF3883)	NOV_ARATH;Protein_NO_VEIN
HVAEP1_T002648.1	NA	NA	NA	NA	NA	PTHR43881:SF1	GAMMA-GLUTAMYLTRANSPEPTIDASE (AFU_ORTHOLOGUE AFUA_4G13580)	PF01019	Gamma-glutamyltranspeptidase	YWRD_BACSU;Glutathione_hydrolase-like_YwrD_proenzyme
HVAEP1_T002649.1	NA	NA	NA	NA	NA	PTHR23504:SF15	PROTEIN ZINC INDUCED FACILITATOR-LIKE 1	PF07690	Major Facilitator Superfamily	ZIFL1_ARATH;Protein_ZINC_INDUCED_FACILITATOR-LIKE_1
HVAEP1_T002651.1	NA	NA	NA	NA	NA	PTHR31511:SF13	PROTEIN CBG24201	NA	NA	NA
HVAEP1_T002654.1	NA	NA	NA	NA	NA	NA	NA	NA	NA	PIF1_BDEBA;ATP-dependent_DNA_helicase_pif1
HVAEP1_T002662.1	NA	NA	NA	NA	NA	NA	NA	PF01926	50S ribosome-binding GTPase	NA
HVAEP1_T002665.1	NA	NA	NA	NA	NA	PTHR47456:SF2	SI:DKEY-31C13.1	PF04434	SWIM zinc finger	NA
HVAEP1_T002666.1	NA	NA	NA	NA	NA	NA	NA	PF00531	Death domain	NA
HVAEP1_T002667.1	NA	NA	NA	NA	NA	PTHR45783:SF3	KINESIN LIGHT CHAIN	PF13424	Tetratricopeptide repeat	NA
HVAEP1_T002668.1	OG0002444	HIPK4, HIPK2, HIPK1, HIPK3	ENSG00000160396, ENSG00000064393, ENSG00000163349, ENSG00000110422	homeodomain interacting protein kinase 3, homeodomain interacting protein kinase 2, homeodomain interacting protein kinase 4, homeodomain interacting protein kinase 1	NA	PTHR24058:SF45	HOMEODOMAIN-INTERACTING PROTEIN KINASE 3	PF00069	Protein kinase domain	HIPK2_HUMAN;Homeodomain-interacting_protein_kinase_2
HVAEP1_T002670.1	NA	NA	NA	NA	NA	PTHR46276	E3 UBIQUITIN-PROTEIN LIGASE UBR5	PF00632	HECT-domain (ubiquitin-transferase)	HYD_DROME;E3_ubiquitin-protein_ligase_hyd
HVAEP1_T002676.1	NA	NA	NA	NA	NA	NA	NA	NA	NA	SETMR_HUMAN;Histone-lysine_N-methyltransferase_SETMAR
HVAEP1_T002677.1	NA	NA	NA	NA	NA	NA	NA	PF00531	Death domain	NA
HVAEP1_T002679.1	OG0007919	#NAME?	FBgn0266172	NA	NA	NA	NA	PF02892	BED zinc finger	NA
HVAEP1_T002681.1	NA	NA	NA	NA	NA	NA	NA	PF01335	Death effector domain	NA
HVAEP1_T002684.2	NA	NA	NA	NA	NA	NA	NA	PF00628	PHD-finger	NA
HVAEP1_T002686.2	NA	NA	NA	NA	NA	NA	NA	PF01335	Death effector domain	NA
HVAEP1_T002690.1	NA	NA	NA	NA	NA	NA	NA	PF00531	Death domain	NA
HVAEP1_T002694.2	NA	NA	NA	NA	NA	NA	NA	NA	NA	PROP_MOUSE;Properdin
HVAEP1_T002695.1	NA	NA	NA	NA	NA	NA	NA	PF01335	Death effector domain	NA
HVAEP1_T002696.1	NA	NA	NA	NA	NA	NA	NA	PF03184	DDE superfamily endonuclease	CLZ9_COCLU;MFS-type_transporter_clz9
HVAEP1_T002699.1	NA	NA	NA	NA	NA	PTHR46927	AGAP005574-PA	PF05485	THAP domain	THAP2_MOUSE;THAP_domain-containing_protein_2
HVAEP1_T002704.1	OG0007919	#NAME?	FBgn0266172	NA	NA	NA	NA	NA	NA	NA
HVAEP1_T002708.1	NA	NA	NA	NA	NA	PTHR24348:SF22	SERINE/THREONINE-PROTEIN KINASE ULK3	PF00069	Protein kinase domain	Y1199_DICDI;Probable_serine/threonine-protein_kinase_DDB_G0282895
HVAEP1_T002716.3	NA	NA	NA	NA	NA	NA	NA	PF05699	hAT family C-terminal dimerisation region	NA
HVAEP1_T002717.1	NA	NA	NA	NA	NA	NA	NA	PF01335	Death effector domain	NA
HVAEP1_T002719.1	NA	NA	NA	NA	NA	PTHR45749:SF10	GENERAL TRANSCRIPTION FACTOR 2-RELATED ZINC FINGER PROTEIN	PF14291	Domain of unknown function (DUF4371)	NA
HVAEP1_T002721.1	NA	NA	NA	NA	NA	NA	NA	PF00531	Death domain	NA
HVAEP1_T002722.1	NA	NA	NA	NA	NA	NA	NA	PF16064	Domain of unknown function (DUF4806)	NA
HVAEP1_T002723.1	NA	NA	NA	NA	NA	PTHR33053:SF18	AGAP000105-PA	NA	NA	NA
HVAEP1_T002725.1	NA	NA	NA	NA	NA	PTHR43647:SF5	DEHYDROGENASE/REDUCTASE-RELATED	NA	NA	PRX1_PENRF;Short-chain_dehydrogenase/reductase_prx1
HVAEP1_T002726.1	NA	NA	NA	NA	NA	PTHR43647:SF5	DEHYDROGENASE/REDUCTASE-RELATED	PF00106	short chain dehydrogenase	TIC32_ARATH;Short-chain_dehydrogenase_TIC_32,_chloroplastic
HVAEP1_T002727.1	NA	NA	NA	NA	NA	PTHR43647:SF5	DEHYDROGENASE/REDUCTASE-RELATED	NA	NA	PRX1_PENRF;Short-chain_dehydrogenase/reductase_prx1
HVAEP1_T002728.1	NA	NA	NA	NA	NA	PTHR43647:SF5	DEHYDROGENASE/REDUCTASE-RELATED	PF00106	short chain dehydrogenase	RDH12_MOUSE;Retinol_dehydrogenase_12
HVAEP1_T002729.1	NA	NA	NA	NA	NA	PTHR10773:SF12	DNA-DIRECTED RNA POLYMERASES I, II, AND III SUBUNIT RPABC2	NA	NA	NA
HVAEP1_T002730.1	NA	NA	NA	NA	NA	NA	NA	PF00531	Death domain	NA
HVAEP1_T002732.2	NA	NA	NA	NA	NA	NA	NA	PF04434	SWIM zinc finger	NA
HVAEP1_T002735.1	OG0001511	GTF2I, GTF2IRD1	ENSG00000263001, ENSG00000006704	GTF2I repeat domain containing 1, general transcription factor IIi	NA	NA	NA	NA	NA	NA
HVAEP1_T002741.1	NA	NA	NA	NA	NA	NA	NA	PF00531	Death domain	NA
HVAEP1_T002744.1	NA	NA	NA	NA	NA	PTHR12483:SF27	COPPER TRANSPORTER 1A, ISOFORM C-RELATED	PF04145	Ctr copper transporter family	COPT1_PIG;High_affinity_copper_uptake_protein_1
HVAEP1_T002745.2	NA	NA	NA	NA	NA	PTHR34407	EXPRESSED PROTEIN	NA	NA	NA
HVAEP1_T002748.1	NA	NA	NA	NA	NA	NA	NA	PF00041	Fibronectin type III domain	USH2A_MOUSE;Usherin
HVAEP1_T002749.1	NA	NA	NA	NA	NA	NA	NA	PF01335	Death effector domain	NA
HVAEP1_T002752.1	OG0001004	GPSM2, GPSM1	ENSG00000121957, ENSG00000160360	G protein signaling modulator 1, G protein signaling modulator 2	NA	PTHR45954:SF3	G-PROTEIN-SIGNALING MODULATOR 2	PF13181	Tetratricopeptide repeat	GPSM1_HUMAN;G-protein-signaling_modulator_1
HVAEP1_T002753.1	NA	NA	NA	NA	NA	NA	NA	NA	NA	USH2A_MOUSE;Usherin
HVAEP1_T002754.1	NA	NA	NA	NA	NA	NA	NA	PF00531	Death domain	NA
HVAEP1_T002757.1	OG0001004	GPSM2, GPSM1	ENSG00000121957, ENSG00000160360	G protein signaling modulator 1, G protein signaling modulator 2	NA	PTHR45954:SF3	G-PROTEIN-SIGNALING MODULATOR 2	NA	NA	GPSM2_HUMAN;G-protein-signaling_modulator_2
HVAEP1_T002759.1	OG0001004	GPSM2, GPSM1	ENSG00000121957, ENSG00000160360	G protein signaling modulator 1, G protein signaling modulator 2	NA	PTHR45954:SF3	G-PROTEIN-SIGNALING MODULATOR 2	PF13176	Tetratricopeptide repeat	GPSM2_HUMAN;G-protein-signaling_modulator_2
HVAEP1_T002760.1	NA	NA	NA	NA	NA	PTHR45749:SF11	AC-LIKE TRANSPOSASE-RELATED	PF05699	hAT family C-terminal dimerisation region	NA
HVAEP1_T002761.1	NA	NA	NA	NA	NA	PTHR47326	TRANSPOSABLE ELEMENT TC3 TRANSPOSASE-LIKE PROTEIN	NA	NA	NA
HVAEP1_T002762.1	NA	NA	NA	NA	NA	NA	NA	PF00531	Death domain	NA
HVAEP1_T002768.1	NA	NA	NA	NA	NA	NA	NA	PF00531	Death domain	NA
HVAEP1_T002770.1	NA	NA	NA	NA	NA	PTHR34153:SF8	SI:DKEY-65L23.2	PF16064	Domain of unknown function (DUF4806)	NA
HVAEP1_T002778.1	NA	NA	NA	NA	NA	NA	NA	PF01498	Transposase	NA
HVAEP1_T002779.1	NA	NA	NA	NA	NA	NA	NA	PF01335	Death effector domain	GPSM2_MOUSE;G-protein-signaling_modulator_2
HVAEP1_T002780.1	OG0001004	GPSM2, GPSM1	ENSG00000121957, ENSG00000160360	G protein signaling modulator 1, G protein signaling modulator 2	NA	PTHR45954:SF3	G-PROTEIN-SIGNALING MODULATOR 2	NA	NA	GPSM2_MOUSE;G-protein-signaling_modulator_2
HVAEP1_T002786.1	NA	NA	NA	NA	NA	NA	NA	PF15299	Amyotrophic lateral sclerosis 2 chromosomal region candidate gene 8	NA
HVAEP1_T002787.1	NA	NA	NA	NA	NA	NA	NA	PF05485	THAP domain	NA
HVAEP1_T002791.1	NA	NA	NA	NA	NA	PTHR11046	OLIGORIBONUCLEASE, MITOCHONDRIAL	NA	NA	NA
HVAEP1_T002794.1	NA	NA	NA	NA	NA	NA	NA	PF01498	Transposase	NA
HVAEP1_T002797.1	NA	NA	NA	NA	NA	NA	NA	PF04434	SWIM zinc finger	NA
HVAEP1_T002798.1	NA	NA	NA	NA	NA	NA	NA	PF00069	Protein kinase domain	NA
HVAEP1_T002799.1	OG0001925	CG2617	FBgn0032877	NA	NA	NA	NA	PF13920	Zinc finger, C3HC4 type (RING finger)	LUL3_ARATH;Probable_E3_ubiquitin-protein_ligase_LUL3
HVAEP1_T002805.1	NA	NA	NA	NA	NA	NA	NA	PF01335	Death effector domain	NA
HVAEP1_T002809.1	NA	NA	NA	NA	NA	NA	NA	NA	NA	PGBD2_HUMAN;PiggyBac_transposable_element-derived_protein_2
HVAEP1_T002813.1	NA	NA	NA	NA	NA	NA	NA	PF00078	Reverse transcriptase (RNA-dependent DNA polymerase)	RTBS_DROME;Probable_RNA-directed_DNA_polymerase_from_transposon_BS
HVAEP1_T002817.1	NA	NA	NA	NA	NA	NA	NA	PF01335	Death effector domain	NA
HVAEP1_T002820.1	NA	NA	NA	NA	NA	NA	NA	PF01335	Death effector domain	NA
HVAEP1_T002823.1	NA	NA	NA	NA	NA	NA	NA	PF00041	Fibronectin type III domain	PTPRQ_MOUSE;Phosphatidylinositol_phosphatase_PTPRQ
HVAEP1_T002824.1	NA	NA	NA	NA	NA	NA	NA	PF00531	Death domain	NA
HVAEP1_T002831.1	OG0000007	ZMYM1	ENSG00000197056	zinc finger MYM-type containing 1	NA	PTHR45749:SF9	AC-LIKE TRANSPOSASE	PF05699	hAT family C-terminal dimerisation region	ZMYM1_HUMAN;Zinc_finger_MYM-type_protein_1
HVAEP1_T002833.1	NA	NA	NA	NA	NA	NA	NA	PF01335	Death effector domain	NA
HVAEP1_T002835.1	NA	NA	NA	NA	NA	PTHR34153:SF8	SI:DKEY-65L23.2	PF16064	Domain of unknown function (DUF4806)	NA
HVAEP1_T002844.1	NA	NA	NA	NA	NA	NA	NA	PF00531	Death domain	NA
HVAEP1_T002847.1	NA	NA	NA	NA	NA	NA	NA	PF00531	Death domain	NA
HVAEP1_T002848.4	OG0001004	GPSM2, GPSM1	ENSG00000121957, ENSG00000160360	G protein signaling modulator 1, G protein signaling modulator 2	NA	NA	NA	PF13424	Tetratricopeptide repeat	GPSM1_HUMAN;G-protein-signaling_modulator_1
HVAEP1_T002849.1	NA	NA	NA	NA	NA	PTHR34153:SF8	SI:DKEY-65L23.2	NA	NA	NA
HVAEP1_T002852.1	OG0001004	GPSM2, GPSM1	ENSG00000121957, ENSG00000160360	G protein signaling modulator 1, G protein signaling modulator 2	NA	PTHR45954:SF3	G-PROTEIN-SIGNALING MODULATOR 2	NA	NA	GPSM1_HUMAN;G-protein-signaling_modulator_1
HVAEP1_T002853.1	NA	NA	NA	NA	NA	NA	NA	PF04434	SWIM zinc finger	NA
HVAEP1_T002854.1	NA	NA	NA	NA	NA	NA	NA	PF00531	Death domain	NA
HVAEP1_T002855.1	NA	NA	NA	NA	NA	NA	NA	PF00531	Death domain	NA
HVAEP1_T002857.1	OG0001004	GPSM2, GPSM1	ENSG00000121957, ENSG00000160360	G protein signaling modulator 1, G protein signaling modulator 2	NA	PTHR45954:SF3	G-PROTEIN-SIGNALING MODULATOR 2	PF13424	Tetratricopeptide repeat	GPSM1_HUMAN;G-protein-signaling_modulator_1
HVAEP1_T002858.1	NA	NA	NA	NA	NA	NA	NA	PF00041	Fibronectin type III domain	NA
HVAEP1_T002859.1	NA	NA	NA	NA	NA	NA	NA	PF00531	Death domain	NA
HVAEP1_T002862.1	NA	NA	NA	NA	NA	PTHR11241:SF0	DEOXYURIDINE TRIPHOSPHATASE	PF00692	dUTPase	DUT_NAUPA;Deoxyuridine_5'-triphosphate_nucleotidohydrolase
HVAEP1_T002867.1	NA	NA	NA	NA	NA	PTHR47526	ATP-DEPENDENT DNA HELICASE	NA	NA	NA
HVAEP1_T002868.1	NA	NA	NA	NA	NA	NA	NA	PF01335	Death effector domain	NA
HVAEP1_T002869.1	NA	NA	NA	NA	NA	NA	NA	PF00531	Death domain	NA
HVAEP1_T002870.1	OG0000316	KCNH6, KCNH2, KCNH7	ENSG00000173826, ENSG00000055118, ENSG00000184611	potassium voltage-gated channel subfamily H member 2, potassium voltage-gated channel subfamily H member 6, potassium voltage-gated channel subfamily H member 7	NA	PTHR10217:SF466	POTASSIUM VOLTAGE-GATED CHANNEL SUBFAMILY H MEMBER 7	NA	NA	KCNH6_RAT;Potassium_voltage-gated_channel_subfamily_H_member_6
HVAEP1_T002873.1	NA	NA	NA	NA	NA	NA	NA	PF00628	PHD-finger	MSC1_SCHPO;Multicopy_suppressor_of_chk1_protein_1
HVAEP1_T002874.1	OG0000364	T05B9.2	WBGene00011465	hypothetical protein	NA	NA	NA	NA	NA	NA
HVAEP1_T002875.1	OG0000364	T05B9.2	WBGene00011465	hypothetical protein	NA	NA	NA	NA	NA	NA
HVAEP1_T002876.1	NA	NA	NA	NA	NA	NA	NA	PF00628	PHD-finger	MSC1_SCHPO;Multicopy_suppressor_of_chk1_protein_1
HVAEP1_T002885.1	NA	NA	NA	NA	NA	NA	NA	PF00531	Death domain	TC1A_CAEEL;Transposable_element_Tc1_transposase
HVAEP1_T002886.1	OG0000018	NLRC3, NLRP13, NLRP8, NLRP4, NLRP9, NLRP14, NLRP7, NLRP7, NLRP7, NLRP7, NLRP7, NLRP7, NLRP7, NLRP7, NLRP7, NLRP7, NLRP2, NLRP2, NLRP2, NLRP2, NLRP2, NLRP2, NLRP2, NLRP2, NLRP2, NLRP2, NLRP2B, PYDC2, NLRP6, NLRP3, NLRP12, NLRP10, NLRP10, NLRP10, NLRP5	ENSG00000167984, ENSG00000173572, ENSG00000179709, ENSG00000160505, ENSG00000185792, ENSG00000158077, ENSG00000277776, ENSG00000274174, ENSG00000277179, ENSG00000277786, ENSG00000275483, ENSG00000277071, ENSG00000274571, ENSG00000276804, ENSG00000167634, ENSG00000278173, ENSG00000275399, ENSG00000275796, ENSG00000274638, ENSG00000275082, ENSG00000278682, ENSG00000278789, ENSG00000273992, ENSG0000…	NLR family pyrin domain containing 7, NLR family pyrin domain containing 2, NLR family pyrin domain containing 10, NLR family pyrin domain containing 2B, NLR family CARD domain containing 3, NLR family pyrin domain containing 14, NLR family pyrin domain containing 6, NLR family pyrin domain containing 12, NLR family pyrin domain containing 8, NLR family pyrin domain containing 4, NLR family pyrin…	NA	NA	NA	NA	NA	NA
HVAEP1_T002887.1	NA	NA	NA	NA	NA	NA	NA	PF00078	Reverse transcriptase (RNA-dependent DNA polymerase)	POLR_DROME;Retrovirus-related_Pol_polyprotein_from_type-2_retrotransposable_element_R2DM
HVAEP1_T002896.1	NA	NA	NA	NA	NA	NA	NA	PF15299	Amyotrophic lateral sclerosis 2 chromosomal region candidate gene 8	NA
HVAEP1_T002899.1	OG0001004	GPSM2, GPSM1	ENSG00000121957, ENSG00000160360	G protein signaling modulator 1, G protein signaling modulator 2	NA	PTHR45954:SF3	G-PROTEIN-SIGNALING MODULATOR 2	NA	NA	NA
HVAEP1_T002902.1	NA	NA	NA	NA	NA	NA	NA	PF00531	Death domain	NA
HVAEP1_T002904.1	NA	NA	NA	NA	NA	NA	NA	PF09588	YqaJ-like viral recombinase domain	NA
HVAEP1_T002908.1	NA	NA	NA	NA	NA	PTHR46468:SF1	SENTRIN-SPECIFIC PROTEASE 8	PF02902	Ulp1 protease family, C-terminal catalytic domain	NA
HVAEP1_T002909.1	OG0001004	GPSM2, GPSM1	ENSG00000121957, ENSG00000160360	G protein signaling modulator 1, G protein signaling modulator 2	NA	PTHR45954:SF3	G-PROTEIN-SIGNALING MODULATOR 2	PF02188; PF13424	GoLoco motif; Tetratricopeptide repeat	GPSM2_HUMAN;G-protein-signaling_modulator_2
HVAEP1_T002912.2	NA	NA	NA	NA	NA	NA	NA	PF01335	Death effector domain	NA
HVAEP1_T002918.1	NA	NA	NA	NA	NA	NA	NA	PF01335	Death effector domain	NA
HVAEP1_T002921.1	NA	NA	NA	NA	NA	NA	NA	PF01335	Death effector domain	NA
HVAEP1_T002927.1	OG0003185	GCLM	ENSG00000023909	glutamate-cysteine ligase modifier subunit	NA	PTHR13295	GLUTAMATE CYSTEINE LIGASE REGULATORY SUBUNIT	NA	NA	GSH0_RAT;Glutamate--cysteine_ligase_regulatory_subunit
HVAEP1_T002928.2	NA	NA	NA	NA	NA	NA	NA	PF02892	BED zinc finger	NA
HVAEP1_T002931.1	NA	NA	NA	NA	NA	PTHR24348:SF22	SERINE/THREONINE-PROTEIN KINASE ULK3	PF00069	Protein kinase domain	Y1199_DICDI;Probable_serine/threonine-protein_kinase_DDB_G0282895
HVAEP1_T002933.1	NA	NA	NA	NA	NA	NA	NA	PF02892	BED zinc finger	NA
HVAEP1_T002934.1	NA	NA	NA	NA	NA	PTHR46791	EXPRESSED PROTEIN	NA	NA	NA
HVAEP1_T002935.1	OG0004397	PSMD7	ENSG00000103035	proteasome 26S subunit, non-ATPase 7	NA	PTHR10540:SF7	26S PROTEASOME NON-ATPASE REGULATORY SUBUNIT 7	PF01398	JAB1/Mov34/MPN/PAD-1 ubiquitin protease	PSMD7_MOUSE;26S_proteasome_non-ATPase_regulatory_subunit_7
HVAEP1_T002940.1	NA	NA	NA	NA	NA	NA	NA	PF12186	Acyl-CoA dehydrogenase C terminal	NA
HVAEP1_T002941.1	NA	NA	NA	NA	NA	PTHR42803:SF1	DEHYDROGENASE, PUTATIVE-RELATED	PF00441	Acyl-CoA dehydrogenase, C-terminal domain	CARC_ACEWD;Caffeyl-CoA_reductase-Etf_complex_subunit_CarC
HVAEP1_T002942.1	NA	NA	NA	NA	NA	PTHR43153:SF9	ELECTRON TRANSFER FLAVOPROTEIN SUBUNIT ALPHA	PF00766	Electron transfer flavoprotein FAD-binding domain	FIXB_CLOSA;Protein_FixB
HVAEP1_T002943.1	NA	NA	NA	NA	NA	PTHR21294:SF17	ELECTRON TRANSFER FLAVOPROTEIN SUBUNIT YDIQ-RELATED	PF01012	Electron transfer flavoprotein domain	ETFB_CLOAB;Electron_transfer_flavoprotein_subunit_beta
HVAEP1_T002944.1	OG0002296	Y71H2B.5	WBGene00022195	hypothetical protein	NA	PTHR43586:SF8	CYSTEINE DESULFURASE 1, CHLOROPLASTIC	PF00266	Aminotransferase class-V	CSD1_MYCLE;Probable_cysteine_desulfurase_1
HVAEP1_T002945.1	NA	NA	NA	NA	NA	PTHR43586:SF8	CYSTEINE DESULFURASE 1, CHLOROPLASTIC	PF00266	Aminotransferase class-V	CSD1_MYCLE;Probable_cysteine_desulfurase_1
HVAEP1_T002946.1	NA	NA	NA	NA	NA	PTHR24567:SF70	HTH-TYPE TRANSCRIPTIONAL REGULATOR CMR	PF00027	Cyclic nucleotide-binding domain	MMP1_MYCAV;Major_membrane_protein_1
HVAEP1_T002947.1	NA	NA	NA	NA	NA	NA	NA	NA	NA	DHKA_DICDI;Hybrid_signal_transduction_histidine_kinase_A
HVAEP1_T002948.1	NA	NA	NA	NA	NA	PTHR43706:SF13	NADH DEHYDROGENASE-RELATED	PF07992	Pyridine nucleotide-disulphide oxidoreductase	NDH_MYCTU;Type_II_NADH:quinone_oxidoreductase_Ndh
HVAEP1_T002949.1	NA	NA	NA	NA	NA	PTHR13710:SF105	BLOOM SYNDROME PROTEIN	PF09382; PF16124; PF00271	RQC domain; RecQ zinc-binding; Helicase conserved C-terminal domain	RECQ_SALTY;ATP-dependent_DNA_helicase_RecQ
HVAEP1_T002950.1	NA	NA	NA	NA	NA	NA	NA	PF00570	HRDC domain	RECQ_SALTY;ATP-dependent_DNA_helicase_RecQ
HVAEP1_T002951.1	NA	NA	NA	NA	NA	PTHR22931	PHOSPHOENOLPYRUVATE DIKINASE-RELATED	PF00391; PF02896	PEP-utilising enzyme, mobile domain; PEP-utilising enzyme, PEP-binding domain	PPDK_CLOSY;Pyruvate,_phosphate_dikinase
HVAEP1_T002952.1	NA	NA	NA	NA	NA	PTHR21235:SF22	GERANYLGERANYLGLYCERYL PHOSPHATE SYNTHASE	PF01884	PcrB family	GGGPS_THESM;Geranylgeranylglyceryl_phosphate_synthase
HVAEP1_T002953.1	NA	NA	NA	NA	NA	NA	NA	PF00436	Single-strand binding protein family	SSB_SHEHA;Single-stranded_DNA-binding_protein
HVAEP1_T002954.1	NA	NA	NA	NA	NA	PTHR43096:SF48	CHAPERONE PROTEIN DNAJ	PF00684; PF01556	DnaJ central domain; DnaJ C terminal domain	DNAJ_PORG3;Chaperone_protein_DnaJ
HVAEP1_T002955.1	NA	NA	NA	NA	NA	NA	NA	PF01025	GrpE	GRPE_BACTN;Protein_GrpE
HVAEP1_T002956.1	NA	NA	NA	NA	NA	NA	NA	PF01926	50S ribosome-binding GTPase	DER_MAGSA;GTPase_Der
HVAEP1_T002957.1	OG0004774	ERAL1	ENSG00000132591	Era like 12S mitochondrial rRNA chaperone 1	NA	PTHR42698:SF2	GTPASE ERA-LIKE, CHLOROPLASTIC	PF07650	KH domain	ERA_LYSSC;GTPase_Era
HVAEP1_T002958.1	OG0004774	ERAL1	ENSG00000132591	Era like 12S mitochondrial rRNA chaperone 1	NA	PTHR42698:SF2	GTPASE ERA-LIKE, CHLOROPLASTIC	PF01926	50S ribosome-binding GTPase	ERA_AMOA5;GTPase_Era
HVAEP1_T002959.1	NA	NA	NA	NA	NA	PTHR21600:SF2	RIBOSOMAL LARGE SUBUNIT PSEUDOURIDINE SYNTHASE E	PF01479; PF00849	S4 domain; RNA pseudouridylate synthase	Y1464_AQUAE;Uncharacterized_RNA_pseudouridine_synthase_aq_1464
HVAEP1_T002960.1	OG0008904	GNE	ENSG00000159921	glucosamine (UDP-N-acetyl)-2-epimerase/N-acetylmannosamine kinase	NA	PTHR43174:SF2	UDP-N-ACETYLGLUCOSAMINE 2-EPIMERASE	PF02350	UDP-N-acetylglucosamine 2-epimerase	WECB_ECOLI;UDP-N-acetylglucosamine_2-epimerase
HVAEP1_T002963.2	NA	NA	NA	NA	NA	PTHR33053:SF18	AGAP000105-PA	NA	NA	NA
HVAEP1_T002964.1	NA	NA	NA	NA	NA	PTHR34153:SF8	SI:DKEY-65L23.2	PF16064	Domain of unknown function (DUF4806)	NA
HVAEP1_T002969.3	OG0003185	GCLM	ENSG00000023909	glutamate-cysteine ligase modifier subunit	NA	PTHR13295	GLUTAMATE CYSTEINE LIGASE REGULATORY SUBUNIT	PF00248	Aldo/keto reductase family	GSH0_MOUSE;Glutamate--cysteine_ligase_regulatory_subunit
HVAEP1_T002970.1	OG0001962	NAA38	ENSG00000183011	N-alpha-acetyltransferase 38, NatC auxiliary subunit	NA	PTHR10701:SF17	N-ALPHA-ACETYLTRANSFERASE 38, NATC AUXILIARY SUBUNIT	PF01423	LSM domain	LSMD1_DANRE;N-alpha-acetyltransferase_38,_NatC_auxiliary_subunit
HVAEP1_T002971.1	OG0001976	CNDP1, CNDP2	ENSG00000150656, ENSG00000133313	carnosine dipeptidase 2, carnosine dipeptidase 1	NA	PTHR43270:SF11	CYTOSOLIC NON-SPECIFIC DIPEPTIDASE	PF01546; PF07687	Peptidase family M20/M25/M40; Peptidase dimerisation domain	CNDP2_MOUSE;Cytosolic_non-specific_dipeptidase
HVAEP1_T002974.1	OG0001043	aex-2	WBGene00000085	G-protein coupled receptor aex-2	NA	NA	NA	NA	NA	NA
HVAEP1_T002978.1	OG0000107	DUSP12	ENSG00000081721	dual specificity phosphatase 12	NA	PTHR45848:SF2	DUAL SPECIFICITY PROTEIN PHOSPHATASE 12	PF00782	Dual specificity phosphatase, catalytic domain	DUS12_HUMAN;Dual_specificity_protein_phosphatase_12
HVAEP1_T002979.1	NA	NA	NA	NA	NA	NA	NA	PF00249	Myb-like DNA-binding domain	DMTF1_DANRE;Cyclin-D-binding_Myb-like_transcription_factor_1
HVAEP1_T002980.1	NA	NA	NA	NA	NA	PTHR45749:SF10	GENERAL TRANSCRIPTION FACTOR 2-RELATED ZINC FINGER PROTEIN	NA	NA	NA
HVAEP1_T002983.1	NA	NA	NA	NA	NA	PTHR10974:SF1	FI21235P1	PF02995	Protein of unknown function (DUF229)	NA
HVAEP1_T002984.1	OG0001422	phf-31, athp-3	WBGene00008747, WBGene00013799	PHd Finger family, AT Hook plus PHD finger transcription factor	NA	NA	NA	NA	NA	NA
HVAEP1_T002985.1	OG0001422	phf-31, athp-3	WBGene00008747, WBGene00013799	PHd Finger family, AT Hook plus PHD finger transcription factor	NA	NA	NA	NA	NA	NA
HVAEP1_T002988.1	OG0000207	HACE1	ENSG00000085382	HECT domain and ankyrin repeat containing E3 ubiquitin protein ligase 1	NA	PTHR11254:SF363	E3 UBIQUITIN-PROTEIN LIGASE HACE1	PF00632; PF13637; PF12796	HECT-domain (ubiquitin-transferase); Ankyrin repeats (many copies); Ankyrin repeats (3 copies)	HACE1_XENTR;E3_ubiquitin-protein_ligase_HACE1
HVAEP1_T002989.1	NA	NA	NA	NA	NA	NA	NA	PF13472	GDSL-like Lipase/Acylhydrolase family	NA
HVAEP1_T002991.1	NA	NA	NA	NA	NA	PTHR10657	PEPTIDYL-PROLYL CIS-TRANS ISOMERASE	PF00639; PF00397	PPIC-type PPIASE domain; WW domain	PIN1_RHIO9;Peptidyl-prolyl_cis-trans_isomerase_pin1
HVAEP1_T002994.1	NA	NA	NA	NA	NA	NA	NA	NA	NA	P52K_HUMAN;52_kDa_repressor_of_the_inhibitor_of_the_protein_kinase
HVAEP1_T002998.1	NA	NA	NA	NA	NA	NA	NA	NA	NA	Y9414_DICDI;Putative_uncharacterized_protein_DDB_G0289245
HVAEP1_T002999.1	NA	NA	NA	NA	NA	NA	NA	PF00001	7 transmembrane receptor (rhodopsin family)	NPY6R_MOUSE;Neuropeptide_Y_receptor_type_6
HVAEP1_T003003.1	NA	NA	NA	NA	NA	PTHR24241:SF126	NEUROPEPTIDE Y RECEPTOR Y2	PF00001	7 transmembrane receptor (rhodopsin family)	NPY6R_MOUSE;Neuropeptide_Y_receptor_type_6
HVAEP1_T003005.3	OG0005578	SPOUT1	ENSG00000198917	SPOUT domain containing methyltransferase 1	NA	PTHR12150	CLASS IV SAM-BINDING METHYLTRANSFERASE-RELATED	PF02598	Putative RNA methyltransferase	CI114_HUMAN;Putative_methyltransferase_C9orf114
HVAEP1_T003014.1	NA	NA	NA	NA	NA	NA	NA	PF00531	Death domain	NA
HVAEP1_T003016.1	OG0000484	RCN1, RCN3, CALU	ENSG00000049449, ENSG00000142552, ENSG00000128595	reticulocalbin 1, calumenin, reticulocalbin 3	NA	PTHR10827:SF76	CALUMENIN	PF13833; PF13202	EF-hand domain pair; EF hand	CALUB_DANRE;Calumenin-B
HVAEP1_T003017.2	OG0002144	DNASE2B, DNASE2	ENSG00000137976, ENSG00000105612	deoxyribonuclease 2, lysosomal, deoxyribonuclease 2 beta	NA	PTHR10858:SF23	DEOXYRIBONUCLEASE II	PF03265	Deoxyribonuclease II	DNA2_ACAPL;Plancitoxin-1
HVAEP1_T003018.1	OG0004149	MASTL	ENSG00000120539	microtubule associated serine/threonine kinase like	NA	PTHR24356:SF1	DROP OUT, ISOFORM A	PF00069	Protein kinase domain	GWL_XENTR;Serine/threonine-protein_kinase_greatwall
HVAEP1_T003019.1	OG0003802	DCDC1	ENSG00000170959	doublecortin domain containing 1	NA	PTHR46302	DOUBLECORTIN DOMAIN-CONTAINING PROTEIN 1	PF03607	Doublecortin	DCDC1_HUMAN;Doublecortin_domain-containing_protein_1
HVAEP1_T003020.1	NA	NA	NA	NA	NA	PTHR24247:SF202	SEROTONIN/OCTOPAMINE RECEPTOR FAMILY	PF00001	7 transmembrane receptor (rhodopsin family)	ADA1A_ORYLA;Alpha-1A_adrenergic_receptor
HVAEP1_T003021.1	NA	NA	NA	NA	NA	PTHR13799	NGG1 INTERACTING FACTOR 3	PF01784	NIF3 (NGG1p interacting factor 3)	GCH1L_BACSU;GTP_cyclohydrolase_1_type_2_homolog
HVAEP1_T003022.3	OG0001303	TOP3B	ENSG00000100038	DNA topoisomerase III beta	NA	PTHR11390:SF20	DNA TOPOISOMERASE 3-BETA-1	PF01131; PF01751	DNA topoisomerase; Toprim domain	TOP3B_HUMAN;DNA_topoisomerase_3-beta-1
HVAEP1_T003024.5	NA	NA	NA	NA	NA	NA	NA	PF00050	Kazal-type serine protease inhibitor domain	IOVO_DRONO;Ovomucoid
HVAEP1_T003025.1	NA	NA	NA	NA	NA	PTHR10913:SF45	MIP10102P-RELATED	PF00050	Kazal-type serine protease inhibitor domain	MCPI_MELCP;Four-domain_proteases_inhibitor
HVAEP1_T003026.1	NA	NA	NA	NA	NA	NA	NA	PF07562; PF00003	Nine Cysteines Domain of family 3 GPCR; 7 transmembrane sweet-taste receptor of 3 GCPR	GRM3_MOUSE;Metabotropic_glutamate_receptor_3
HVAEP1_T003032.1	NA	NA	NA	NA	NA	NA	NA	PF00531	Death domain	NA
HVAEP1_T003034.1	NA	NA	NA	NA	NA	PTHR47456:SF2	SI:DKEY-31C13.1	NA	NA	NA
HVAEP1_T003035.1	NA	NA	NA	NA	NA	NA	NA	PF15299	Amyotrophic lateral sclerosis 2 chromosomal region candidate gene 8	NA
HVAEP1_T003036.1	NA	NA	NA	NA	NA	NA	NA	PF15299	Amyotrophic lateral sclerosis 2 chromosomal region candidate gene 8	NA
HVAEP1_T003039.1	OG0000007	ZMYM1	ENSG00000197056	zinc finger MYM-type containing 1	NA	PTHR45749:SF9	AC-LIKE TRANSPOSASE	PF05699	hAT family C-terminal dimerisation region	NA
HVAEP1_T003048.1	NA	NA	NA	NA	NA	PTHR47456:SF2	SI:DKEY-31C13.1	NA	NA	NA
HVAEP1_T003049.1	NA	NA	NA	NA	NA	NA	NA	PF01335	Death effector domain	NA
HVAEP1_T003054.1	NA	NA	NA	NA	NA	NA	NA	PF01335	Death effector domain	NA
HVAEP1_T003064.1	NA	NA	NA	NA	NA	NA	NA	PF01335	Death effector domain	NA
HVAEP1_T003065.1	NA	NA	NA	NA	NA	NA	NA	PF15299	Amyotrophic lateral sclerosis 2 chromosomal region candidate gene 8	NA
HVAEP1_T003066.1	NA	NA	NA	NA	NA	NA	NA	PF15299	Amyotrophic lateral sclerosis 2 chromosomal region candidate gene 8	NA
HVAEP1_T003067.1	NA	NA	NA	NA	NA	NA	NA	PF02902	Ulp1 protease family, C-terminal catalytic domain	NA
HVAEP1_T003068.1	NA	NA	NA	NA	NA	PTHR31025:SF18	SI:DKEY-286J15.1	NA	NA	NA
HVAEP1_T003070.1	NA	NA	NA	NA	NA	NA	NA	PF07714	Protein tyrosine and serine/threonine kinase	NA
HVAEP1_T003074.2	OG0000007	ZMYM1	ENSG00000197056	zinc finger MYM-type containing 1	NA	PTHR45749:SF11	AC-LIKE TRANSPOSASE-RELATED	PF14291	Domain of unknown function (DUF4371)	ZMYM1_HUMAN;Zinc_finger_MYM-type_protein_1
HVAEP1_T003075.1	NA	NA	NA	NA	NA	NA	NA	PF00531	Death domain	NA
HVAEP1_T003076.1	NA	NA	NA	NA	NA	NA	NA	PF15299	Amyotrophic lateral sclerosis 2 chromosomal region candidate gene 8	NA
HVAEP1_T003077.1	NA	NA	NA	NA	NA	PTHR47456:SF2	SI:DKEY-31C13.1	NA	NA	NA
HVAEP1_T003082.1	NA	NA	NA	NA	NA	NA	NA	PF00531	Death domain	NA
HVAEP1_T003087.1	NA	NA	NA	NA	NA	NA	NA	PF15299	Amyotrophic lateral sclerosis 2 chromosomal region candidate gene 8	NA
HVAEP1_T003092.1	NA	NA	NA	NA	NA	NA	NA	PF17852	Dynein heavy chain AAA lid domain	DYH3_MOUSE;Dynein_axonemal_heavy_chain_3
HVAEP1_T003093.1	NA	NA	NA	NA	NA	NA	NA	PF12775	P-loop containing dynein motor region	DYH7_HUMAN;Dynein_axonemal_heavy_chain_7
HVAEP1_T003101.1	NA	NA	NA	NA	NA	NA	NA	PF15299	Amyotrophic lateral sclerosis 2 chromosomal region candidate gene 8	NA
HVAEP1_T003102.2	OG0011140	med7	ENSXETG00000038990	uncharacterized LOC101731765	NA	NA	NA	PF16064	Domain of unknown function (DUF4806)	NA
HVAEP1_T003104.1	NA	NA	NA	NA	NA	NA	NA	PF15299	Amyotrophic lateral sclerosis 2 chromosomal region candidate gene 8	NA
HVAEP1_T003107.1	NA	NA	NA	NA	NA	NA	NA	PF01335	Death effector domain	NA
HVAEP1_T003109.1	OG0000574	KMT5A	ENSG00000183955	lysine methyltransferase 5A	NA	PTHR46167	N-LYSINE METHYLTRANSFERASE KMT5A	PF00856	SET domain	SET1_CAEEL;Histone-lysine_N-methyltransferase_set-1
HVAEP1_T003113.1	NA	NA	NA	NA	NA	NA	NA	PF12780	P-loop containing dynein motor region D4	DYH3_HUMAN;Dynein_axonemal_heavy_chain_3
HVAEP1_T003114.1	NA	NA	NA	NA	NA	NA	NA	PF12780	P-loop containing dynein motor region D4	DYH3_MOUSE;Dynein_axonemal_heavy_chain_3
HVAEP1_T003119.2	NA	NA	NA	NA	NA	PTHR33053:SF18	AGAP000105-PA	NA	NA	NA
HVAEP1_T003120.1	NA	NA	NA	NA	NA	NA	NA	PF05485	THAP domain	NA
HVAEP1_T003121.3	NA	NA	NA	NA	NA	NA	NA	PF15299	Amyotrophic lateral sclerosis 2 chromosomal region candidate gene 8	NA
HVAEP1_T003128.4	NA	NA	NA	NA	NA	NA	NA	NA	NA	KMT5A_XENTR;N-lysine_methyltransferase_KMT5A
HVAEP1_T003141.1	NA	NA	NA	NA	NA	NA	NA	PF12017	Transposase protein	NA
HVAEP1_T003145.1	NA	NA	NA	NA	NA	NA	NA	NA	NA	P52K_HUMAN;52_kDa_repressor_of_the_inhibitor_of_the_protein_kinase
HVAEP1_T003146.2	NA	NA	NA	NA	NA	NA	NA	PF01335	Death effector domain	NA
HVAEP1_T003147.1	OG0000018	CIITA	ENSG00000179583	class II major histocompatibility complex transactivator	NA	NA	NA	NA	NA	NA
HVAEP1_T003153.1	NA	NA	NA	NA	NA	PTHR31912:SF32	ZINC FINGER, C2H2 TYPE DOMAINCONTAINING PROTEIN	PF02992	Transposase family tnp2	NA
HVAEP1_T003154.1	NA	NA	NA	NA	NA	PTHR31912:SF32	ZINC FINGER, C2H2 TYPE DOMAINCONTAINING PROTEIN	NA	NA	NA
HVAEP1_T003162.1	NA	NA	NA	NA	NA	NA	NA	PF12775; PF12780	P-loop containing dynein motor region; P-loop containing dynein motor region D4	DYH3_MOUSE;Dynein_axonemal_heavy_chain_3
HVAEP1_T003163.1	OG0000011	DNAH5	ENSG00000039139	dynein axonemal heavy chain 5	NA	PTHR46454:SF15	DYNEIN AXONEMAL HEAVY CHAIN 1	PF12780; PF12777	P-loop containing dynein motor region D4; Microtubule-binding stalk of dynein motor	DYH3_HUMAN;Dynein_axonemal_heavy_chain_3
HVAEP1_T003171.1	NA	NA	NA	NA	NA	PTHR33053:SF18	AGAP000105-PA	NA	NA	NA
HVAEP1_T003172.1	NA	NA	NA	NA	NA	NA	NA	PF00531	Death domain	NA
HVAEP1_T003174.1	NA	NA	NA	NA	NA	NA	NA	PF01335	Death effector domain	NA
HVAEP1_T003175.1	OG0001134	VRTN	ENSG00000133980	vertebrae development associated	NA	NA	NA	NA	NA	NA
HVAEP1_T003176.1	NA	NA	NA	NA	NA	NA	NA	PF01335	Death effector domain	NA
HVAEP1_T003183.2	NA	NA	NA	NA	NA	PTHR45749:SF11	AC-LIKE TRANSPOSASE-RELATED	PF14291	Domain of unknown function (DUF4371)	ZMYM1_HUMAN;Zinc_finger_MYM-type_protein_1
HVAEP1_T003184.1	OG0000007	ZMYM1	ENSG00000197056	zinc finger MYM-type containing 1	NA	PTHR45749:SF9	AC-LIKE TRANSPOSASE	PF05699	hAT family C-terminal dimerisation region	ZMYM1_HUMAN;Zinc_finger_MYM-type_protein_1
HVAEP1_T003185.1	OG0000111	MGC115716	ENSXETG00000001042	uncharacterized LOC100145450	NA	PTHR21446:SF9	KIAA1958	PF12012	Domain of unknown function (DUF3504)	K1958_HUMAN;Uncharacterized_protein_KIAA1958
HVAEP1_T003190.1	OG0004554	RPS18, RPS18, RPS18, RPS18, RPS18	ENSG00000223367, ENSG00000226225, ENSG00000096150, ENSG00000235650, ENSG00000231500	ribosomal protein S18	NA	PTHR10871:SF3	40S RIBOSOMAL PROTEIN S18-RELATED	PF00416	Ribosomal protein S13/S18	RS18_BRABE;40S_ribosomal_protein_S18
HVAEP1_T003191.1	OG0000087	ARL1	ENSG00000120805	ADP ribosylation factor like GTPase 1	NA	PTHR11711:SF372	ADP-RIBOSYLATION FACTOR 3	PF00025	ADP-ribosylation factor family	ARL1_MOUSE;ADP-ribosylation_factor-like_protein_1
HVAEP1_T003192.1	NA	NA	NA	NA	NA	NA	NA	PF00412	LIM domain	NA
HVAEP1_T003195.2	OG0000204	LMX1A, LMX1B	ENSG00000162761, ENSG00000136944	LIM homeobox transcription factor 1 beta, LIM homeobox transcription factor 1 alpha	NA	PTHR24208:SF166	LIM HOMEOBOX TRANSCRIPTION FACTOR 1 ALPHA, ISOFORM B	PF00412; PF00046	LIM domain; Homeodomain	LMX1A_HUMAN;LIM_homeobox_transcription_factor_1-alpha
HVAEP1_T003196.1	NA	NA	NA	NA	NA	PTHR24230:SF75	ALLATOSTATIN A RECEPTOR 2, ISOFORM A	PF00001	7 transmembrane receptor (rhodopsin family)	NA
HVAEP1_T003197.1	NA	NA	NA	NA	NA	NA	NA	PF00412; PF00046	LIM domain; Homeodomain	LHX6_HUMAN;LIM/homeobox_protein_Lhx6
HVAEP1_T003198.1	OG0001895	VAV2, VAV1, VAV3	ENSG00000160293, ENSG00000141968, ENSG00000134215	vav guanine nucleotide exchange factor 1, vav guanine nucleotide exchange factor 2, vav guanine nucleotide exchange factor 3	NA	PTHR45818	PROTEIN VAV	PF14604; PF00307; PF00130; PF00017; PF00621	Variant SH3 domain; Calponin homology (CH) domain; Phorbol esters/diacylglycerol binding domain (C1 domain); SH2 domain; RhoGEF domain	VAV2_MOUSE;Guanine_nucleotide_exchange_factor_VAV2
HVAEP1_T003202.1	OG0001720	GALK2	ENSG00000156958	galactokinase 2	NA	PTHR10457:SF7	N-ACETYLGALACTOSAMINE KINASE	PF10509; PF00288	Galactokinase galactose-binding signature; GHMP kinases N terminal domain	GALK2_RAT;N-acetylgalactosamine_kinase
HVAEP1_T003210.1	NA	NA	NA	NA	NA	NA	NA	PF00628	PHD-finger	NA
HVAEP1_T003211.1	NA	NA	NA	NA	NA	NA	NA	PF01335	Death effector domain	NA
HVAEP1_T003212.1	NA	NA	NA	NA	NA	NA	NA	PF16064	Domain of unknown function (DUF4806)	NA
HVAEP1_T003218.1	NA	NA	NA	NA	NA	NA	NA	PF01335	Death effector domain	NA
HVAEP1_T003219.1	NA	NA	NA	NA	NA	NA	NA	PF01335	Death effector domain	NA
HVAEP1_T003224.1	NA	NA	NA	NA	NA	NA	NA	PF01335	Death effector domain	NA
HVAEP1_T003226.1	OG0005730	URI1	ENSG00000105176	URI1 prefoldin like chaperone	NA	NA	NA	NA	NA	NA
HVAEP1_T003227.2	OG0000346	ARHGEF39	ENSG00000137135	Rho guanine nucleotide exchange factor 39	NA	NA	NA	PF00621	RhoGEF domain	ARG39_MOUSE;Rho_guanine_nucleotide_exchange_factor_39
HVAEP1_T003230.2	OG0002082	PIK3R4	ENSG00000196455	phosphoinositide-3-kinase regulatory subunit 4	NA	PTHR17583	PHOSPHOINOSITIDE 3-KINASE REGULATORY SUBUNIT 4	PF00069; PF00400	Protein kinase domain; WD domain, G-beta repeat	PI3R4_HUMAN;Phosphoinositide_3-kinase_regulatory_subunit_4
HVAEP1_T003231.1	OG0001651	GFPT1, GFPT2	ENSG00000198380, ENSG00000131459	glutamine-fructose-6-phosphate transaminase 2, glutamine--fructose-6-phosphate transaminase 1	NA	PTHR10937:SF10	GLUTAMINE--FRUCTOSE-6-PHOSPHATE AMINOTRANSFERASE [ISOMERIZING] 2	PF01380	SIS domain	GFPT2_BOVIN;Glutamine--fructose-6-phosphate_aminotransferase_[isomerizing]_2
HVAEP1_T003233.1	NA	NA	NA	NA	NA	PTHR33309:SF5	MICROSOMAL DIPEPTIDASE FAMILY PROTEIN	NA	NA	NA
HVAEP1_T003234.1	OG0002341	NCOR2, NCOR1	ENSG00000196498, ENSG00000141027	nuclear receptor corepressor 1, nuclear receptor corepressor 2	NA	PTHR13992	NUCLEAR RECEPTOR CO-REPRESSOR RELATED NCOR	PF00249	Myb-like DNA-binding domain	NCOR1_MOUSE;Nuclear_receptor_corepressor_1
HVAEP1_T003235.2	OG0000009	MEP1A	ENSG00000112818	meprin A subunit alpha	NA	NA	NA	PF01400	Astacin (Peptidase family M12A)	HE12_DANRE;Hatching_enzyme_1.2
HVAEP1_T003237.1	NA	NA	NA	NA	NA	PTHR21255:SF56	AT23443P	PF03645	Tctex-1 family	DYLT2_MOUSE;Dynein_light_chain_Tctex-type_protein_2
HVAEP1_T003238.1	OG0000007	ZMYM1	ENSG00000197056	zinc finger MYM-type containing 1	NA	NA	NA	NA	NA	NA
HVAEP1_T003239.1	NA	NA	NA	NA	JQ994210.1; transcription factor ZNF436	PTHR24381:SF308	CHROMATIN-LINKED ADAPTOR FOR MSL PROTEINS, ISOFORM B-RELATED	PF00096	Zinc finger, C2H2 type	NA
HVAEP1_T003240.1	OG0004780	PLAA	ENSG00000137055	phospholipase A2 activating protein	NA	NA	NA	PF08324; PF09070; PF00400	PUL domain; PFU (PLAA family ubiquitin binding); WD domain, G-beta repeat	PLAP_RAT;Phospholipase_A-2-activating_protein
HVAEP1_T003242.1	NA	NA	NA	NA	NA	NA	NA	PF13384; PF01498	Homeodomain-like domain; Transposase	NA
HVAEP1_T003243.1	OG0001511	GTF2I, GTF2IRD1	ENSG00000263001, ENSG00000006704	GTF2I repeat domain containing 1, general transcription factor IIi	NA	NA	NA	NA	NA	NA
HVAEP1_T003246.1	NA	NA	NA	NA	NA	NA	NA	PF10545	Alcohol dehydrogenase transcription factor Myb/SANT-like	NA
HVAEP1_T003256.1	NA	NA	NA	NA	NA	PTHR37162:SF1	HAT FAMILY DIMERISATION DOMAINCONTAINING PROTEIN	NA	NA	NA
HVAEP1_T003293.1	OG0000976	Gm21833, Gm21962, Gm21750, Gm21897	ENSMUSG00000094030, ENSMUSG00000094856, ENSMUSG00000096463, ENSMUSG00000094472		NA	PTHR25952:SF199	GENE, 17555-RELATED	PF03372	Endonuclease/Exonuclease/phosphatase family	LORF2_HUMAN;LINE-1_retrotransposable_element_ORF2_protein
HVAEP1_T003294.1	OG0000321	rpl22l1, txlna, tmprss11f, cpm, camlg, ncln, med9	ENSXETG00000035493, ENSXETG00000037891, ENSXETG00000040087, ENSXETG00000040612, ENSXETG00000038173, ENSXETG00000038007, ENSXETG00000035613		NA	NA	NA	PF00078	Reverse transcriptase (RNA-dependent DNA polymerase)	YTX2_XENLA;Transposon_TX1_uncharacterized_149_kDa_protein
HVAEP1_T003296.1	OG0000321	rpl22l1, txlna, tmprss11f, cpm, camlg, ncln, med9	ENSXETG00000035493, ENSXETG00000037891, ENSXETG00000040087, ENSXETG00000040612, ENSXETG00000038173, ENSXETG00000038007, ENSXETG00000035613		NA	NA	NA	PF03372; PF13966; PF00078	Endonuclease/Exonuclease/phosphatase family; zinc-binding in reverse transcriptase; Reverse transcriptase (RNA-dependent DNA polymerase)	YTX2_XENLA;Transposon_TX1_uncharacterized_149_kDa_protein
HVAEP1_T003302.1	OG0000976	Gm21833, Gm21962, Gm21750, Gm21897	ENSMUSG00000094030, ENSMUSG00000094856, ENSMUSG00000096463, ENSMUSG00000094472		NA	NA	NA	PF03372	Endonuclease/Exonuclease/phosphatase family	LORF2_HUMAN;LINE-1_retrotransposable_element_ORF2_protein
HVAEP1_T003311.1	OG0005101	EXOSC2	ENSG00000130713	exosome component 2	NA	PTHR21321:SF4	EXOSOME COMPLEX COMPONENT RRP4	PF14382; PF15985	Exosome complex exonuclease RRP4 N-terminal region; KH domain	EXOS2_BOVIN;Exosome_complex_component_RRP4
HVAEP1_T003312.3	NA	NA	NA	NA	NA	NA	NA	PF12796	Ankyrin repeats (3 copies)	NA
HVAEP1_T003313.1	OG0001104	KIF23	ENSG00000137807	kinesin family member 23	NA	PTHR24115:SF600	KINESIN-LIKE PROTEIN KIF23	PF16540; PF00225	Arf6-interacting domain of mitotic kinesin-like protein 1; Kinesin motor domain	KIF23_HUMAN;Kinesin-like_protein_KIF23
HVAEP1_T003314.1	OG0002445	SETDB2	ENSG00000136169	SET domain bifurcated histone lysine methyltransferase 2	NA	PTHR46024	HISTONE-LYSINE N-METHYLTRANSFERASE EGGLESS	PF18358; PF05033; PF00856; PF18359; PF01429	Histone methyltransferase Tudor domain; Pre-SET motif; SET domain; Histone methyltransferase Tudor domain 1; Methyl-CpG binding domain	STB1B_DANRE;Histone-lysine_N-methyltransferase_SETDB1-B
HVAEP1_T003320.1	NA	NA	NA	NA	NA	NA	NA	PF16064	Domain of unknown function (DUF4806)	NA
HVAEP1_T003331.2	NA	NA	NA	NA	NA	NA	NA	PF03184	DDE superfamily endonuclease	CLZ9_COCLU;MFS-type_transporter_clz9
HVAEP1_T003332.1	OG0004886	KRR1	ENSG00000111615	KRR1 small subunit processome component homolog	NA	PTHR12581	HIV-1 REV BINDING PROTEIN 2, 3	PF17903	Krr1 KH1 domain	KRR1_DROPE;KRR1_small_subunit_processome_component_homolog
HVAEP1_T003333.1	OG0001101	B9D1	ENSG00000108641	B9 domain containing 1	NA	PTHR12968:SF1	B9 DOMAIN-CONTAINING PROTEIN 1	PF07162	Ciliary basal body-associated, B9 protein	B9D1_RAT;B9_domain-containing_protein_1
HVAEP1_T003336.1	OG0004158	ZDHHC16	ENSG00000171307	zinc finger DHHC-type palmitoyltransferase 16	NA	PTHR12246	PALMITOYLTRANSFERASE ZDHHC16	PF01529	DHHC palmitoyltransferase	ZD16A_DANRE;Palmitoyltransferase_ZDHHC16A
HVAEP1_T003337.1	OG0006719	COMMD9	ENSG00000110442	COMM domain containing 9	NA	PTHR15663	COMM DOMAIN-CONTAINING PROTEIN 9	PF07258	COMM domain	COMD9_MOUSE;COMM_domain-containing_protein_9
HVAEP1_T003339.1	OG0001190	RABGEF1	ENSG00000154710	RAB guanine nucleotide exchange factor 1	NA	PTHR23101:SF107	RAB GUANINE NUCLEOTIDE EXCHANGE FACTOR (GEF) 1-RELATED	PF18151; PF02204	Domain of unknown function (DUF5601); Vacuolar sorting protein 9 (VPS9) domain	RABX5_BOVIN;Rab5_GDP/GTP_exchange_factor
HVAEP1_T003340.1	NA	NA	NA	NA	NA	PTHR10656:SF69	MAB-21 DOMAIN CONTAINING 2	PF03281	Mab-21 protein	MB213_MOUSE;Protein_mab-21-like_3
HVAEP1_T003341.1	OG0000218	CSRP3, CSRP1, CSRP2	ENSG00000129170, ENSG00000159176, ENSG00000175183	cysteine and glycine rich protein 3, cysteine and glycine rich protein 2, cysteine and glycine rich protein 1	NA	PTHR24215	RHO-GTPASE-ACTIVATING PROTEIN LRG1	PF00412	LIM domain	CSRP2_BOVIN;Cysteine_and_glycine-rich_protein_2
HVAEP1_T003342.1	OG0002827	IPO8, IPO7	ENSG00000133704, ENSG00000205339	importin 8, importin 7	NA	PTHR10997:SF27	IMPORTIN-7	PF03810	Importin-beta N-terminal domain	IPO7_MOUSE;Importin-7
HVAEP1_T003343.2	NA	NA	NA	NA	NA	PTHR33393	POLYGLUTAMINE SYNTHESIS ACCESSORY PROTEIN RV0574C-RELATED	PF09587	Bacterial capsule synthesis protein PGA_cap	CAPA_BACSU;PGA_biosynthesis_protein_CapA
HVAEP1_T003345.1	OG0004392	TMEM161A, TMEM161B	ENSG00000064545, ENSG00000164180	transmembrane protein 161A, transmembrane protein 161B	NA	PTHR13624	RE42071P	PF10268	Predicted transmembrane protein 161AB	T161B_MOUSE;Transmembrane_protein_161B
HVAEP1_T003347.1	NA	NA	NA	NA	NA	PTHR19282:SF442	CD151 ANTIGEN	PF00335	Tetraspanin family	CD151_RAT;CD151_antigen
HVAEP1_T003348.1	NA	NA	NA	NA	NA	PTHR19282:SF442	CD151 ANTIGEN	PF00335	Tetraspanin family	CD151_RAT;CD151_antigen
HVAEP1_T003350.1	NA	NA	NA	NA	NA	NA	NA	PF00003; PF01094	7 transmembrane sweet-taste receptor of 3 GCPR; Receptor family ligand binding region	GRM3_MOUSE;Metabotropic_glutamate_receptor_3
HVAEP1_T003352.1	NA	NA	NA	NA	NA	NA	NA	PF00071	Ras family	RAB21_BOVIN;Ras-related_protein_Rab-21
HVAEP1_T003353.1	OG0009991	C9orf16	ENSG00000171159	bublin coiled coil protein	NA	NA	NA	PF03670	Uncharacterised protein family (UPF0184)	NA
HVAEP1_T003354.1	OG0001043	aex-2	WBGene00000085	G-protein coupled receptor aex-2	NA	NA	NA	NA	NA	NA
HVAEP1_T003355.1	OG0001043	aex-2	WBGene00000085	G-protein coupled receptor aex-2	NA	NA	NA	NA	NA	NA
HVAEP1_T003356.1	OG0000097	RNF122, RNF24	ENSG00000133874, ENSG00000101236	ring finger protein 24, ring finger protein 122	NA	PTHR22937:SF117	E3 UBIQUITIN-PROTEIN LIGASE MBR1-LIKE	PF13639	Ring finger domain	ZFP1_ORYSJ;Probable_E3_ubiquitin-protein_ligase_ZFP1
HVAEP1_T003357.1	OG0000097	RNF122, RNF24	ENSG00000133874, ENSG00000101236	ring finger protein 24, ring finger protein 122	NA	PTHR45798	RING-H2 FINGER PROTEIN ATL61-RELATED-RELATED	PF13639	Ring finger domain	RN122_HUMAN;RING_finger_protein_122
HVAEP1_T003358.1	OG0000097	RNF122, RNF24	ENSG00000133874, ENSG00000101236	ring finger protein 24, ring finger protein 122	NA	PTHR22937:SF123	E3 UBIQUITIN-PROTEIN LIGASE HIP1-RELATED	PF13639	Ring finger domain	RN122_HUMAN;RING_finger_protein_122
HVAEP1_T003361.1	OG0000937	MYPOP	ENSG00000176182	Myb related transcription factor, partner of profilin	NA	NA	NA	NA	NA	NA
HVAEP1_T003363.1	NA	NA	NA	NA	NA	NA	NA	PF05485	THAP domain	THAP2_HUMAN;THAP_domain-containing_protein_2
HVAEP1_T003365.1	OG0002565	QSOX2, QSOX1	ENSG00000165661, ENSG00000116260	quiescin sulfhydryl oxidase 2, quiescin sulfhydryl oxidase 1	NA	PTHR22897:SF6	SULFHYDRYL OXIDASE 1	PF18108; PF04777; PF00085; PF18371	QSOX Trx-like domain; Erv1 / Alr family; Thioredoxin; Flavin adenine dinucleotide (FAD)-dependent sulfhydryl oxidase	QSOX1_MOUSE;Sulfhydryl_oxidase_1
HVAEP1_T003366.1	OG0003562	XRCC5	ENSG00000079246	X-ray repair cross complementing 5	NA	PTHR12604:SF4	X-RAY REPAIR CROSS-COMPLEMENTING PROTEIN 5	PF03730; PF02735; PF03731; PF08785	Ku70/Ku80 C-terminal arm; Ku70/Ku80 beta-barrel domain; Ku70/Ku80 N-terminal alpha/beta domain; Ku C terminal domain like	XRCC5_HUMAN;X-ray_repair_cross-complementing_protein_5
HVAEP1_T003367.1	OG0006741	TRAF3IP2	ENSG00000056972	TRAF3 interacting protein 2	NA	NA	NA	PF08357; PF00531	SEFIR domain; Death domain	NA
HVAEP1_T003368.1	NA	NA	NA	NA	NA	PTHR14398	RNA RECOGNITION RRM/RNP DOMAIN	PF01480	PWI domain	RBM26_XENLA;RNA-binding_protein_26
HVAEP1_T003369.1	NA	NA	NA	NA	NA	NA	NA	PF00071	Ras family	RERG_HUMAN;Ras-related_and_estrogen-regulated_growth_inhibitor
HVAEP1_T003370.1	NA	NA	NA	NA	NA	NA	NA	PF08357	SEFIR domain	NA
HVAEP1_T003371.1	OG0002946	PRR5L, PRR5-ARHGAP8, PRR5	ENSG00000135362, ENSG00000248405, ENSG00000186654	PRR5-ARHGAP8 readthrough, proline rich 5, proline rich 5 like	NA	PTHR32428:SF3	PROLINE-RICH PROTEIN 5-LIKE	NA	NA	PRR5_MOUSE;Proline-rich_protein_5
HVAEP1_T003372.2	NA	NA	NA	NA	NA	NA	NA	PF07679; PF08357	Immunoglobulin I-set domain; SEFIR domain	PTPRF_DANRE;Receptor-type_tyrosine-protein_phosphatase_F
HVAEP1_T003374.1	NA	NA	NA	NA	NA	NA	NA	PF08357; PF07679	SEFIR domain; Immunoglobulin I-set domain	PTPRF_DANRE;Receptor-type_tyrosine-protein_phosphatase_F
HVAEP1_T003376.1	NA	NA	NA	NA	NA	NA	NA	PF00093	von Willebrand factor type C domain	CHRD_XENLA;Chordin
HVAEP1_T003379.2	NA	NA	NA	NA	NA	NA	NA	PF03645	Tctex-1 family	NA
HVAEP1_T003380.1	OG0000202	CG6739	FBgn0031926	NA	NA	PTHR11309:SF47	FRIZZLED	PF01392	Fz domain	MOM5_CAEEL;Protein_mom-5
HVAEP1_T003381.1	OG0002604	ASPM	ENSG00000066279	assembly factor for spindle microtubules	NA	PTHR22590:SF4	ABNORMAL SPINDLE-LIKE MICROCEPHALY-ASSOCIATED PROTEIN	PF00307; PF00612; PF15780	Calponin homology (CH) domain; IQ calmodulin-binding motif; Abnormal spindle-like microcephaly-assoc'd, ASPM-SPD-2-Hydin	ASPM_CANLF;Abnormal_spindle-like_microcephaly-associated_protein_homolog
HVAEP1_T003384.1	NA	NA	NA	NA	NA	NA	NA	PF00001	7 transmembrane receptor (rhodopsin family)	ADA1B_MESAU;Alpha-1B_adrenergic_receptor
HVAEP1_T003385.1	NA	NA	NA	NA	NA	PTHR24026:SF36	CADHERIN EGF LAG SEVEN-PASS G-TYPE RECEPTOR 1	NA	NA	CELR1_MOUSE;Cadherin_EGF_LAG_seven-pass_G-type_receptor_1
HVAEP1_T003387.2	NA	NA	NA	NA	NA	NA	NA	PF00028	Cadherin domain	FAT_DROME;Cadherin-related_tumor_suppressor
HVAEP1_T003388.1	OG0000317	FBXW7	ENSG00000109670	F-box and WD repeat domain containing 7	NA	PTHR19849:SF1	F-BOX/WD REPEAT-CONTAINING PROTEIN 7	PF12836; PF12937; PF00400	Helix-hairpin-helix motif; F-box-like; WD domain, G-beta repeat	FBXW7_DROME;F-box/WD_repeat-containing_protein_7
HVAEP1_T003389.1	OG0001649	ELMOD3	ENSG00000115459	ELMO domain containing 3	NA	PTHR12771:SF2	ELMO DOMAIN-CONTAINING PROTEIN 3	PF04727	ELMO/CED-12 family	ELMD3_BOVIN;ELMO_domain-containing_protein_3
HVAEP1_T003391.1	NA	NA	NA	NA	NA	PTHR13037:SF21	PROTEIN CAPPUCCINO	NA	NA	NA
HVAEP1_T003392.1	OG0003861	ORC5	ENSG00000164815	origin recognition complex subunit 5	NA	PTHR12705	ORIGIN RECOGNITION COMPLEX SUBUNIT 5	PF14630; PF13401	Origin recognition complex (ORC) subunit 5 C-terminus; AAA domain	ORC5_MOUSE;Origin_recognition_complex_subunit_5
HVAEP1_T003393.1	NA	NA	NA	NA	NA	NA	NA	NA	NA	TIGD1_HUMAN;Tigger_transposable_element-derived_protein_1
HVAEP1_T003394.1	NA	NA	NA	NA	NA	PTHR33309:SF5	MICROSOMAL DIPEPTIDASE FAMILY PROTEIN	NA	NA	NA
HVAEP1_T003396.3	OG0002106	CARS1, CARS1	ENSG00000278191, ENSG00000110619	cysteinyl-tRNA synthetase 1	NA	PTHR10890:SF3	CYSTEINE--TRNA LIGASE, CYTOPLASMIC	PF01406	tRNA synthetases class I (C) catalytic domain	SYCC_CHICK;Cysteine--tRNA_ligase,_cytoplasmic
HVAEP1_T003397.1	NA	NA	NA	NA	NA	NA	NA	PF16064	Domain of unknown function (DUF4806)	NA
HVAEP1_T003398.1	NA	NA	NA	NA	NA	NA	NA	PF00052; PF00055; PF00053	Laminin B (Domain IV); Laminin N-terminal (Domain VI); Laminin EGF domain	LAMB1_DROME;Laminin_subunit_beta-1
HVAEP1_T003405.1	NA	NA	NA	NA	NA	PTHR33053:SF18	AGAP000105-PA	NA	NA	NA
HVAEP1_T003407.1	NA	NA	NA	NA	NA	NA	NA	PF00474	Sodium:solute symporter family	SC5A8_HUMAN;Sodium-coupled_monocarboxylate_transporter_1
HVAEP1_T003409.1	NA	NA	NA	NA	NA	PTHR42985:SF31	LD47995P-RELATED	PF00474	Sodium:solute symporter family	SC5A8_XENLA;Sodium-coupled_monocarboxylate_transporter_1
HVAEP1_T003411.1	OG0000280	BCL2A1, MCL1	ENSG00000140379, ENSG00000143384	BCL2 related protein A1, ADAMTSL4 antisense RNA 1, MCL1 apoptosis regulator, BCL2 family member	EU035765.1; bcl-2-like 3	NA	NA	PF00452	Apoptosis regulator proteins, Bcl-2 family	BAX_BOVIN;Apoptosis_regulator_BAX
HVAEP1_T003412.1	OG0000729	SLC26A11	ENSG00000181045	solute carrier family 26 member 11	NA	PTHR11814:SF245	SODIUM-INDEPENDENT SULFATE ANION TRANSPORTER-LIKE PROTEIN	PF00916	Sulfate permease family	S2611_BOVIN;Sodium-independent_sulfate_anion_transporter
HVAEP1_T003413.1	OG0000729	SLC26A11	ENSG00000181045	solute carrier family 26 member 11	NA	PTHR11814:SF55	SODIUM-INDEPENDENT SULFATE ANION TRANSPORTER	PF00916	Sulfate permease family	S2611_BOVIN;Sodium-independent_sulfate_anion_transporter
HVAEP1_T003414.1	NA	NA	NA	NA	NA	NA	NA	PF00078	Reverse transcriptase (RNA-dependent DNA polymerase)	RTJK_DROFU;RNA-directed_DNA_polymerase_from_mobile_element_jockey
HVAEP1_T003415.1	OG0000729	SLC26A11	ENSG00000181045	solute carrier family 26 member 11	NA	PTHR11814:SF55	SODIUM-INDEPENDENT SULFATE ANION TRANSPORTER	PF00916	Sulfate permease family	S2611_BOVIN;Sodium-independent_sulfate_anion_transporter
HVAEP1_T003416.1	OG0005555	HAUS3	ENSG00000214367	HAUS augmin like complex subunit 3	NA	NA	NA	NA	NA	NA
HVAEP1_T003417.3	NA	NA	NA	NA	NA	NA	NA	PF00474	Sodium:solute symporter family	SC5A8_HUMAN;Sodium-coupled_monocarboxylate_transporter_1
HVAEP1_T003420.1	NA	NA	NA	NA	NA	NA	NA	NA	NA	SC5A8_XENLA;Sodium-coupled_monocarboxylate_transporter_1
HVAEP1_T003421.1	NA	NA	NA	NA	NA	NA	NA	PF00474	Sodium:solute symporter family	SC5A8_XENLA;Sodium-coupled_monocarboxylate_transporter_1
HVAEP1_T003422.1	OG0005389	PLPP7, PLPP6	ENSG00000160539, ENSG00000205808	phospholipid phosphatase 6, phospholipid phosphatase 7 (inactive)	NA	PTHR14969:SF13	AT30094P	PF01569	PAP2 superfamily	PLPP6_MOUSE;Phospholipid_phosphatase_6
HVAEP1_T003423.1	OG0005714	GMNN	ENSG00000112312	geminin DNA replication inhibitor	NA	NA	NA	PF07412	Geminin	GEMI_MOUSE;Geminin
HVAEP1_T003426.1	OG0004386	INTS5	ENSG00000185085	integrator complex subunit 5	NA	PTHR31697	INTEGRATOR COMPLEX SUBUNIT 5	PF14837; PF14838	Integrator complex subunit 5 N-terminus; Integrator complex subunit 5 C-terminus	INT5_MOUSE;Integrator_complex_subunit_5
HVAEP1_T003439.1	OG0000407	DDC	ENSG00000132437	dopa decarboxylase	NA	PTHR11999:SF144	MIP05841P	PF00282	Pyridoxal-dependent decarboxylase conserved domain	DDC_MOUSE;Aromatic-L-amino-acid_decarboxylase
HVAEP1_T003440.1	NA	NA	NA	NA	NA	PTHR11905	ADAM A DISINTEGRIN AND METALLOPROTEASE DOMAIN	PF01421; PF01562	Reprolysin (M12B) family zinc metalloprotease; Reprolysin family propeptide	ADAM9_MOUSE;Disintegrin_and_metalloproteinase_domain-containing_protein_9
HVAEP1_T003442.1	OG0000407	DDC	ENSG00000132437	dopa decarboxylase	NA	PTHR11999:SF144	MIP05841P	PF00282	Pyridoxal-dependent decarboxylase conserved domain	DDC_MOUSE;Aromatic-L-amino-acid_decarboxylase
HVAEP1_T003443.1	OG0000721	ABCF1, ABCF1, ABCF1, ABCF1, ABCF1, ABCF1, ABCF1	ENSG00000236342, ENSG00000225989, ENSG00000231129, ENSG00000232169, ENSG00000206490, ENSG00000236149, ENSG00000204574	ATP binding cassette subfamily F member 1	NA	PTHR19211:SF14	ATP-BINDING CASSETTE SUB-FAMILY F MEMBER 1	PF12848	ABC transporter	ABCF1_MOUSE;ATP-binding_cassette_sub-family_F_member_1
HVAEP1_T003445.1	OG0000563	GPX3, GPX6, GPX6, GPX5, GPX5	ENSG00000211445, ENSG00000281185, ENSG00000198704, ENSG00000257770, ENSG00000224586	glutathione peroxidase 5, glutathione peroxidase 6, glutathione peroxidase 3	NA	NA	NA	PF00255	Glutathione peroxidase	GPX5_PIG;Epididymal_secretory_glutathione_peroxidase
HVAEP1_T003446.1	OG0004310	HMGCS2, HMGCS1	ENSG00000134240, ENSG00000112972	3-hydroxy-3-methylglutaryl-CoA synthase 1, 3-hydroxy-3-methylglutaryl-CoA synthase 2	NA	PTHR43323	3-HYDROXY-3-METHYLGLUTARYL COENZYME A SYNTHASE	PF01154; PF08540	Hydroxymethylglutaryl-coenzyme A synthase N terminal; Hydroxymethylglutaryl-coenzyme A synthase C terminal	HMCS1_MOUSE;Hydroxymethylglutaryl-CoA_synthase,_cytoplasmic
HVAEP1_T003447.1	OG0006654	L3HYPDH	ENSG00000126790	trans-L-3-hydroxyproline dehydratase	NA	PTHR33442	TRANS-3-HYDROXY-L-PROLINE DEHYDRATASE	PF05544	Proline racemase	T3HPD_SACKO;Trans-L-3-hydroxyproline_dehydratase
HVAEP1_T003448.1	OG0001724	FUBP3, KHSRP, FUBP1	ENSG00000107164, ENSG00000088247, ENSG00000162613	KH-type splicing regulatory protein, far upstream element binding protein 3, far upstream element binding protein 1	NA	PTHR10288:SF99	FAR UPSTREAM ELEMENT-BINDING PROTEIN 1	PF00013	KH domain	FUBP1_HUMAN;Far_upstream_element-binding_protein_1
HVAEP1_T003449.2	OG0004662	LRRC56, LRRC56	ENSG00000273831, ENSG00000161328	leucine rich repeat containing 56	NA	PTHR22708:SF0	LEUCINE-RICH REPEAT-CONTAINING PROTEIN 56	NA	NA	LRC56_HUMAN;Leucine-rich_repeat-containing_protein_56
HVAEP1_T003451.1	OG0000324	B4GALT6, B4GALT5, B4GALT4, B4GALT3, B4GALT1, B4GALT2	ENSG00000118276, ENSG00000158470, ENSG00000121578, ENSG00000158850, ENSG00000086062, ENSG00000117411	beta-1,4-galactosyltransferase 6, beta-1,4-galactosyltransferase 1, beta-1,4-galactosyltransferase 5, beta-1,4-galactosyltransferase 2, beta-1,4-galactosyltransferase 4, beta-1,4-galactosyltransferase 3	NA	NA	NA	PF02709; PF13733	N-terminal domain of galactosyltransferase; N-terminal region of glycosyl transferase group 7	BRE4_CAEEL;Beta-1,4-N-acetylgalactosaminyltransferase_bre-4
HVAEP1_T003452.1	OG0000299	pde-5	WBGene00016328	Probable 3',5'-cyclic phosphodiesterase pde-5	NA	PTHR11347:SF111	CAMP AND CAMP-INHIBITED CGMP 3',5'-CYCLIC PHOSPHODIESTERASE 10A	PF01590; PF00233	GAF domain; 3'5'-cyclic nucleotide phosphodiesterase	PDE5_CAEEL;Probable_3',5'-cyclic_phosphodiesterase_pde-5
HVAEP1_T003453.1	OG0000007	ZMYM1	ENSG00000197056	zinc finger MYM-type containing 1	NA	PTHR45749:SF11	AC-LIKE TRANSPOSASE-RELATED	PF14291	Domain of unknown function (DUF4371)	NA
HVAEP1_T003455.3	OG0006795	MRPL55	ENSG00000162910	mitochondrial ribosomal protein L55	NA	PTHR34095	39S RIBOSOMAL PROTEIN L55, MITOCHONDRIAL	PF09776	Mitochondrial ribosomal protein L55	RM55_DROME;39S_ribosomal_protein_L55,_mitochondrial
HVAEP1_T003456.1	OG0000093	LAMC2, LAMC1, LAMC3	ENSG00000058085, ENSG00000135862, ENSG00000050555	laminin subunit gamma 3, laminin subunit gamma 1, laminin subunit gamma 2	NA	PTHR10574:SF270	LAMININ SUBUNIT GAMMA-1	PF00055; PF00053; PF00052	Laminin N-terminal (Domain VI); Laminin EGF domain; Laminin B (Domain IV)	LAMC1_MOUSE;Laminin_subunit_gamma-1
HVAEP1_T003457.1	OG0001453	UBR4	ENSG00000127481	ubiquitin protein ligase E3 component n-recognin 4	NA	PTHR21725:SF1	E3 UBIQUITIN-PROTEIN LIGASE UBR4	PF02207; PF13764	Putative zinc finger in N-recognin (UBR box); E3 ubiquitin-protein ligase UBR4	UBR4_HUMAN;E3_ubiquitin-protein_ligase_UBR4
HVAEP1_T003459.1	OG0002288	SET, SETSIP	ENSG00000119335, ENSG00000230667	SET nuclear proto-oncogene, SET like protein	NA	PTHR11875:SF67	PROTEIN SET	PF00956	Nucleosome assembly protein (NAP)	SET_MOUSE;Protein_SET
HVAEP1_T003460.1	OG0002288	SET, SETSIP	ENSG00000119335, ENSG00000230667	SET nuclear proto-oncogene, SET like protein	AY213094.1; SET protein	PTHR11875:SF67	PROTEIN SET	NA	NA	SET_MOUSE;Protein_SET
HVAEP1_T003463.1	NA	NA	NA	NA	NA	PTHR11905	ADAM A DISINTEGRIN AND METALLOPROTEASE DOMAIN	PF00200; PF00090; PF01421; PF00754; PF01562	Disintegrin; Thrombospondin type 1 domain; Reprolysin (M12B) family zinc metalloprotease; F5/8 type C domain; Reprolysin family propeptide	ADA21_HUMAN;Disintegrin_and_metalloproteinase_domain-containing_protein_21
HVAEP1_T003470.1	NA	NA	NA	NA	NA	PTHR24543	MULTICOPPER OXIDASE-RELATED	PF00754; PF00090; PF00200	F5/8 type C domain; Thrombospondin type 1 domain; Disintegrin	SEM5A_HUMAN;Semaphorin-5A
HVAEP1_T003477.2	NA	NA	NA	NA	NA	PTHR11905	ADAM A DISINTEGRIN AND METALLOPROTEASE DOMAIN	PF00090; PF00200; PF00754; PF01562; PF01421	Thrombospondin type 1 domain; Disintegrin; F5/8 type C domain; Reprolysin family propeptide; Reprolysin (M12B) family zinc metalloprotease	ADAM8_MOUSE;Disintegrin_and_metalloproteinase_domain-containing_protein_8
HVAEP1_T003478.1	NA	NA	NA	NA	NA	PTHR45948	DUAL SPECIFICITY PROTEIN PHOSPHATASE DDB_G0269404-RELATED	PF00782	Dual specificity phosphatase, catalytic domain	DUS22_MOUSE;Dual_specificity_protein_phosphatase_22
HVAEP1_T003479.1	OG0003398	NPHP4	ENSG00000131697	nephrocystin 4	NA	PTHR31043	NEPHROCYSTIN-4	NA	NA	NPHP4_XENLA;Nephrocystin-4
HVAEP1_T003480.1	OG0001233	LSM2, LSM2, LSM2, LSM2, LSM2, LSM2	ENSG00000224979, ENSG00000225998, ENSG00000231502, ENSG00000236826, ENSG00000172850, ENSG00000204392	LSM2 homolog, U6 small nuclear RNA and mRNA degradation associated	NA	PTHR13829	SNRNP CORE PROTEIN FAMILY MEMBER	PF01423	LSM domain	LSM2_HUMAN;U6_snRNA-associated_Sm-like_protein_LSm2
HVAEP1_T003481.1	OG0005485	EXOSC1	ENSG00000171311	exosome component 1	NA	PTHR12686	3'-5' EXORIBONUCLEASE CSL4-RELATED	PF10447; PF14382	Exosome component EXOSC1/CSL4; Exosome complex exonuclease RRP4 N-terminal region	EXOS1_HUMAN;Exosome_complex_component_CSL4
HVAEP1_T003482.1	NA	NA	NA	NA	NA	PTHR45630:SF8	CATION-TRANSPORTING ATPASE	PF12409; PF00690; PF00122	P5-type ATPase cation transporter; Cation transporter/ATPase, N-terminus; E1-E2 ATPase	AT133_MACFA;Polyamine-transporting_ATPase_13A3
HVAEP1_T003483.1	NA	NA	NA	NA	NA	PTHR45630:SF8	CATION-TRANSPORTING ATPASE	PF00122; PF00702	E1-E2 ATPase; haloacid dehalogenase-like hydrolase	AT133_MOUSE;Polyamine-transporting_ATPase_13A3
HVAEP1_T003484.1	NA	NA	NA	NA	NA	PTHR45630:SF8	CATION-TRANSPORTING ATPASE	NA	NA	AT133_MACFA;Polyamine-transporting_ATPase_13A3
HVAEP1_T003485.1	NA	NA	NA	NA	NA	PTHR48078:SF14	SI:CH73-263O4.4	PF00291	Pyridoxal-phosphate dependent enzyme	SRR_DICDI;Probable_serine_racemase
HVAEP1_T003487.1	NA	NA	NA	NA	NA	PTHR19964:SF79	INACTIVATION-NO-AFTER-POTENTIAL D PROTEIN	PF00595	PDZ domain	MPDZ_RAT;Multiple_PDZ_domain_protein
HVAEP1_T003488.1	OG0003398	NPHP4	ENSG00000131697	nephrocystin 4	NA	PTHR31043	NEPHROCYSTIN-4	NA	NA	NPHP4_XENLA;Nephrocystin-4
HVAEP1_T003489.1	OG0001233	LSM2, LSM2, LSM2, LSM2, LSM2, LSM2	ENSG00000224979, ENSG00000225998, ENSG00000231502, ENSG00000236826, ENSG00000172850, ENSG00000204392	LSM2 homolog, U6 small nuclear RNA and mRNA degradation associated	NA	PTHR13829	SNRNP CORE PROTEIN FAMILY MEMBER	PF01423	LSM domain	LSM2_HUMAN;U6_snRNA-associated_Sm-like_protein_LSm2
HVAEP1_T003490.1	OG0005485	EXOSC1	ENSG00000171311	exosome component 1	NA	PTHR12686	3'-5' EXORIBONUCLEASE CSL4-RELATED	PF10447; PF14382	Exosome component EXOSC1/CSL4; Exosome complex exonuclease RRP4 N-terminal region	EXOS1_HUMAN;Exosome_complex_component_CSL4
HVAEP1_T003491.1	NA	NA	NA	NA	NA	NA	NA	PF12409	P5-type ATPase cation transporter	AT133_MACFA;Polyamine-transporting_ATPase_13A3
HVAEP1_T003492.1	NA	NA	NA	NA	NA	PTHR45630:SF8	CATION-TRANSPORTING ATPASE	PF00690; PF00122	Cation transporter/ATPase, N-terminus; E1-E2 ATPase	AT133_HUMAN;Polyamine-transporting_ATPase_13A3
HVAEP1_T003493.1	NA	NA	NA	NA	NA	PTHR45630:SF8	CATION-TRANSPORTING ATPASE	PF13246	Cation transport ATPase (P-type)	AT133_MOUSE;Polyamine-transporting_ATPase_13A3
HVAEP1_T003494.1	NA	NA	NA	NA	NA	PTHR45630:SF8	CATION-TRANSPORTING ATPASE	NA	NA	AT133_MOUSE;Polyamine-transporting_ATPase_13A3
HVAEP1_T003495.1	NA	NA	NA	NA	NA	PTHR48078:SF14	SI:CH73-263O4.4	PF00291	Pyridoxal-phosphate dependent enzyme	SRR_DICDI;Probable_serine_racemase
HVAEP1_T003498.1	NA	NA	NA	NA	NA	NA	NA	PF14299	Phloem protein 2	NA
HVAEP1_T003499.1	NA	NA	NA	NA	NA	NA	NA	PF14299	Phloem protein 2	NA
HVAEP1_T003503.2	NA	NA	NA	NA	NA	NA	NA	PF05485	THAP domain	NA
HVAEP1_T003506.1	NA	NA	NA	NA	NA	NA	NA	PF00782	Dual specificity phosphatase, catalytic domain	123R_IIV6;Putative_tyrosine_phosphatase_123R
HVAEP1_T003507.1	OG0005485	EXOSC1	ENSG00000171311	exosome component 1	NA	PTHR12686	3'-5' EXORIBONUCLEASE CSL4-RELATED	PF14382; PF10447	Exosome complex exonuclease RRP4 N-terminal region; Exosome component EXOSC1/CSL4	EXOS1_HUMAN;Exosome_complex_component_CSL4
HVAEP1_T003508.1	NA	NA	NA	NA	NA	NA	NA	PF12409	P5-type ATPase cation transporter	NA
HVAEP1_T003509.1	NA	NA	NA	NA	NA	PTHR45630:SF8	CATION-TRANSPORTING ATPASE	PF00702; PF00122	haloacid dehalogenase-like hydrolase; E1-E2 ATPase	AT133_MOUSE;Polyamine-transporting_ATPase_13A3
HVAEP1_T003510.1	NA	NA	NA	NA	NA	PTHR48078:SF14	SI:CH73-263O4.4	PF00291	Pyridoxal-phosphate dependent enzyme	TSAL_GEOSL;L-threonine_ammonia-lyase
HVAEP1_T003512.1	NA	NA	NA	NA	NA	NA	NA	PF14299	Phloem protein 2	NA
HVAEP1_T003513.2	NA	NA	NA	NA	NA	NA	NA	PF14299	Phloem protein 2	NA
HVAEP1_T003515.1	OG0006566	RAD51AP1	ENSG00000111247	RAD51 associated protein 1	NA	NA	NA	NA	NA	NA
HVAEP1_T003516.1	OG0004972	RPS5	ENSG00000083845	ribosomal protein S5	NA	PTHR11205:SF34	40S RIBOSOMAL PROTEIN S5	PF00177	Ribosomal protein S7p/S5e	RS5_PODCA;40S_ribosomal_protein_S5
HVAEP1_T003517.2	NA	NA	NA	NA	NA	NA	NA	PF00505	HMG (high mobility group) box	NA
HVAEP1_T003518.1	OG0005936	ZWILCH	ENSG00000174442	zwilch kinetochore protein	NA	PTHR15995	PROTEIN ZWILCH HOMOLOG	PF09817	RZZ complex, subunit zwilch	ZWILC_XENTR;Protein_zwilch_homolog
HVAEP1_T003519.1	OG0005936	ZWILCH	ENSG00000174442	zwilch kinetochore protein	NA	NA	NA	NA	NA	NA
HVAEP1_T003520.1	OG0004724	BCS1L	ENSG00000074582	BCS1 homolog, ubiquinol-cytochrome c reductase complex chaperone	NA	PTHR23070:SF9	MITOCHONDRIAL CHAPERONE BCS1-A-RELATED	PF00004; PF08740	ATPase family associated with various cellular activities (AAA); BCS1 N terminal	BCS1_DANRE;Mitochondrial_chaperone_BCS1
HVAEP1_T003521.4	OG0004657	DSCC1	ENSG00000136982	DNA replication and sister chromatid cohesion 1	NA	PTHR13395	SISTER CHROMATID COHESION PROTEIN DCC1-RELATED	PF09724	Sister chromatid cohesion protein Dcc1	DCC1_XENLA;Sister_chromatid_cohesion_protein_DCC1
HVAEP1_T003522.1	NA	NA	NA	NA	NA	PTHR19964:SF79	INACTIVATION-NO-AFTER-POTENTIAL D PROTEIN	PF00595	PDZ domain	MPDZ_RAT;Multiple_PDZ_domain_protein
HVAEP1_T003523.1	OG0000355	CG6204	FBgn0039165	NA	NA	PTHR10887:SF470	NFX1-TYPE ZINC FINGER-CONTAINING PROTEIN 1	PF13086	AAA domain	ZNFX1_MOUSE;NFX1-type_zinc_finger-containing_protein_1
HVAEP1_T003525.1	NA	NA	NA	NA	NA	NA	NA	PF02944	BESS motif	NA
HVAEP1_T003526.1	NA	NA	NA	NA	NA	NA	NA	NA	NA	KS1_HYDVU;KS1_protein
HVAEP1_T003529.1	NA	NA	NA	NA	NA	NA	NA	NA	NA	HOBOT_DROME;Transposable_element_Hobo_transposase
HVAEP1_T003531.1	NA	NA	NA	NA	NA	NA	NA	NA	NA	HOBOT_DROME;Transposable_element_Hobo_transposase
HVAEP1_T003533.3	NA	NA	NA	NA	NA	NA	NA	NA	NA	KS1_HYDVU;KS1_protein
HVAEP1_T003534.1	NA	NA	NA	NA	NA	NA	NA	NA	NA	KS1_HYDVU;KS1_protein
HVAEP1_T003535.1	NA	NA	NA	NA	NA	NA	NA	PF01522	Polysaccharide deacetylase	CDA7_BOMMO;Chitin_deacetylase_7
HVAEP1_T003536.1	NA	NA	NA	NA	NA	NA	NA	PF01522	Polysaccharide deacetylase	CDA8_BOMMO;Chitin_deacetylase_8
HVAEP1_T003537.1	NA	NA	NA	NA	NA	PTHR44927	FK506-BINDING PROTEIN 15	NA	NA	NA
HVAEP1_T003540.1	NA	NA	NA	NA	NA	NA	NA	NA	NA	CDA8_BOMMO;Chitin_deacetylase_8
HVAEP1_T003541.1	NA	NA	NA	NA	NA	NA	NA	NA	NA	CDA8_BOMMO;Chitin_deacetylase_8
HVAEP1_T003542.1	NA	NA	NA	NA	NA	PTHR44927	FK506-BINDING PROTEIN 15	PF00254	FKBP-type peptidyl-prolyl cis-trans isomerase	FKB15_MOUSE;FK506-binding_protein_15
HVAEP1_T003543.1	OG0005442	GOLGA1	ENSG00000136935	golgin A1	NA	PTHR23157:SF24	GOLGIN SUBFAMILY A MEMBER 1	PF01465	GRIP domain	GOGA1_MOUSE;Golgin_subfamily_A_member_1
HVAEP1_T003544.1	OG0003557	WDR46, WDR46, WDR46, WDR46, WDR46	ENSG00000226916, ENSG00000236222, ENSG00000204221, ENSG00000227057, ENSG00000206284	WD repeat domain 46	NA	PTHR14085	WD-REPEAT PROTEIN BING4	PF00400; PF08149	WD domain, G-beta repeat; BING4CT (NUC141) domain	UTP7_SCHPO;Probable_U3_small_nucleolar_RNA-associated_protein_7
HVAEP1_T003545.2	OG0007587	CG2991	FBgn0031474	NA	NA	PTHR20893	LD08641P	PF12906	RING-variant domain	MARH5_DANRE;E3_ubiquitin-protein_ligase_MARCHF5
HVAEP1_T003546.1	OG0003126	PELI3, PELI1, PELI2	ENSG00000174516, ENSG00000197329, ENSG00000139946	pellino E3 ubiquitin protein ligase family member 2, pellino E3 ubiquitin protein ligase 1, pellino E3 ubiquitin protein ligase family member 3	NA	PTHR12098	E3 UBIQUITIN-PROTEIN LIGASE PELLINO-RELATED	PF04710	Pellino	PELI1_MOUSE;E3_ubiquitin-protein_ligase_pellino_homolog_1
HVAEP1_T003548.1	NA	NA	NA	NA	NA	NA	NA	PF17105	C-terminal domain of bromodomain protein 4	BRDT_XENTR;Bromodomain_testis-specific_protein
HVAEP1_T003549.1	OG0001309	BRD4, BRD2, BRD2, BRD2, BRD2, BRD2, BRD2, BRD2, BRD3, BRDT	ENSG00000141867, ENSG00000234704, ENSG00000230678, ENSG00000215077, ENSG00000234507, ENSG00000204256, ENSG00000236227, ENSG00000235307, ENSG00000169925, ENSG00000137948	bromodomain containing 2, bromodomain containing 4, bromodomain containing 3, bromodomain testis associated	NA	PTHR22880:SF143	BROMODOMAIN-CONTAINING PROTEIN 4	PF00439	Bromodomain	BRD2_MOUSE;Bromodomain-containing_protein_2
HVAEP1_T003550.1	OG0002151	SLC25A24, SLC25A24, SLC25A41, SLC25A23, SLC25A25	ENSG00000284468, ENSG00000085491, ENSG00000181240, ENSG00000125648, ENSG00000148339	solute carrier family 25 member 24, solute carrier family 25 member 25, solute carrier family 25 member 23, solute carrier family 25 member 41	NA	PTHR24089:SF711	FI05451P	PF13499; PF00153	EF-hand domain pair; Mitochondrial carrier protein	SCMC1_MOUSE;Calcium-binding_mitochondrial_carrier_protein_SCaMC-1
HVAEP1_T003551.1	NA	NA	NA	NA	NA	NA	NA	PF03645	Tctex-1 family	NA
HVAEP1_T003552.1	NA	NA	NA	NA	NA	NA	NA	PF03645	Tctex-1 family	NA
HVAEP1_T003553.1	NA	NA	NA	NA	NA	NA	NA	PF03645	Tctex-1 family	NA
HVAEP1_T003555.1	NA	NA	NA	NA	NA	PTHR11207:SF0	RIBONUCLEASE 3	PF14622; PF00035; PF00636	Ribonuclease-III-like; Double-stranded RNA binding motif; Ribonuclease III domain	RNC_MOUSE;Ribonuclease_3
HVAEP1_T003556.1	NA	NA	NA	NA	NA	PTHR11207:SF0	RIBONUCLEASE 3	NA	NA	RNC_MOUSE;Ribonuclease_3
HVAEP1_T003558.1	NA	NA	NA	NA	NA	PTHR43530	QUEUINE TRNA-RIBOSYLTRANSFERASE CATALYTIC SUBUNIT 1	PF01702	Queuine tRNA-ribosyltransferase	TGT_RAT;Queuine_tRNA-ribosyltransferase_catalytic_subunit_1
HVAEP1_T003559.2	NA	NA	NA	NA	NA	PTHR43530	QUEUINE TRNA-RIBOSYLTRANSFERASE CATALYTIC SUBUNIT 1	PF01702	Queuine tRNA-ribosyltransferase	TGT_DANRE;Queuine_tRNA-ribosyltransferase_catalytic_subunit_1
HVAEP1_T003560.2	OG0002543	Mps1	FBgn0000063	NA	NA	PTHR22974:SF21	DUAL SPECIFICITY PROTEIN KINASE TTK	PF00069	Protein kinase domain	TTK_MACFA;Dual_specificity_protein_kinase_TTK
HVAEP1_T003561.1	NA	NA	NA	NA	NA	PTHR46605:SF1	DEATH DOMAIN-CONTAINING MEMBRANE PROTEIN NRADD	PF00020; PF00531	TNFR/NGFR cysteine-rich region; Death domain	TNR14_MOUSE;Tumor_necrosis_factor_receptor_superfamily_member_14
HVAEP1_T003562.1	OG0006019	ANKRD45	ENSG00000183831	ankyrin repeat domain 45	NA	PTHR24180:SF14	ANKYRIN REPEAT DOMAIN-CONTAINING PROTEIN 45	PF13606	Ankyrin repeat	ANR45_HUMAN;Ankyrin_repeat_domain-containing_protein_45
HVAEP1_T003563.2	OG0002034	CERCAM, COLGALT2, COLGALT1	ENSG00000167123, ENSG00000198756, ENSG00000130309	collagen beta(1-O)galactosyltransferase 1, cerebral endothelial cell adhesion molecule, collagen beta(1-O)galactosyltransferase 2	NA	PTHR10730:SF8	PROCOLLAGEN GALACTOSYLTRANSFERASE 2	PF13704; PF01755	Glycosyl transferase family 2; Glycosyltransferase family 25 (LPS biosynthesis protein)	GT252_HUMAN;Procollagen_galactosyltransferase_2
HVAEP1_T003564.1	OG0003400	GYS1, GYS2	ENSG00000104812, ENSG00000111713	glycogen synthase 2, glycogen synthase 1	NA	PTHR10176	GLYCOGEN SYNTHASE	PF05693	Glycogen synthase	GYS1_RABIT;Glycogen_[starch]_synthase,_muscle
HVAEP1_T003566.2	OG0000363	CRYZ	ENSG00000116791	crystallin zeta	NA	PTHR44154	QUINONE OXIDOREDUCTASE	PF00107; PF08240	Zinc-binding dehydrogenase; Alcohol dehydrogenase GroES-like domain	QOR_PONAB;Quinone_oxidoreductase
HVAEP1_T003567.1	NA	NA	NA	NA	NA	PTHR33053:SF18	AGAP000105-PA	NA	NA	NA
HVAEP1_T003568.1	NA	NA	NA	NA	NA	PTHR45641:SF1	TETRATRICOPEPTIDE REPEAT PROTEIN (AFU_ORTHOLOGUE AFUA_6G03870)	PF13424	Tetratricopeptide repeat	NA
HVAEP1_T003569.1	NA	NA	NA	NA	NA	NA	NA	PF13424	Tetratricopeptide repeat	NA
HVAEP1_T003570.1	OG0000250	NCS1	ENSG00000107130	neuronal calcium sensor 1	NA	PTHR23055:SF172	NEURONAL CALCIUM SENSOR FAMILY	PF00036; PF13499	EF hand; EF-hand domain pair	NCS1_CHICK;Neuronal_calcium_sensor_1
HVAEP1_T003571.2	OG0005469	CCDC105	ENSG00000160994	coiled-coil domain containing 105	NA	PTHR35081	COILED-COIL DOMAIN-CONTAINING PROTEIN 105	PF03148	Tektin family	CC105_BOVIN;Coiled-coil_domain-containing_protein_105
HVAEP1_T003574.1	OG0000014	TRIM28, TRIM66, TRIM33, TRIM24	ENSG00000130726, ENSG00000166436, ENSG00000197323, ENSG00000122779	tripartite motif containing 66, tripartite motif containing 24, tripartite motif containing 28, tripartite motif containing 33	NA	PTHR45915:SF3	E3 UBIQUITIN-PROTEIN LIGASE TRIM33	PF00643; PF00628; PF00439	B-box zinc finger; PHD-finger; Bromodomain	TIF1A_MOUSE;Transcription_intermediary_factor_1-alpha
HVAEP1_T003575.1	NA	NA	NA	NA	NA	NA	NA	PF01436	NHL repeat	NA
HVAEP1_T003576.1	OG0007236	TSEN15	ENSG00000198860	tRNA splicing endonuclease subunit 15	NA	PTHR28582	TRNA-SPLICING ENDONUCLEASE SUBUNIT SEN15	PF09631	Sen15 protein	NA
HVAEP1_T003577.1	OG0000124	CG7402, CG7408, CG32191, CG8646	FBgn0036768, FBgn0036765, FBgn0052191, FBgn0033763	NA	NA	PTHR10342:SF269	RE14504P	PF00884	Sulfatase	ARSB_FELCA;Arylsulfatase_B
HVAEP1_T003579.1	NA	NA	NA	NA	NA	PTHR45749:SF11	AC-LIKE TRANSPOSASE-RELATED	PF05699	hAT family C-terminal dimerisation region	NA
HVAEP1_T003580.1	OG0000124	CG7402, CG7408, CG32191, CG8646	FBgn0036768, FBgn0036765, FBgn0052191, FBgn0033763	NA	NA	PTHR10342:SF269	RE14504P	PF00884	Sulfatase	ARSI_RAT;Arylsulfatase_I
HVAEP1_T003581.1	OG0000071	TSPAN11, CD151	ENSG00000110900, ENSG00000177697	tetraspanin 11, CD151 molecule (Raph blood group)	NA	PTHR19282:SF442	CD151 ANTIGEN	PF00335	Tetraspanin family	CD151_RAT;CD151_antigen
HVAEP1_T003582.1	NA	NA	NA	NA	NA	PTHR20003	GLYCOPROTEIN-RELATED	NA	NA	NA
HVAEP1_T003583.1	OG0000041	PRDM13	ENSG00000112238	PR/SET domain 13	NA	PTHR16515:SF21	PR DOMAIN ZINC FINGER PROTEIN 13	PF00096	Zinc finger, C2H2 type	PRD13_MOUSE;PR_domain_zinc_finger_protein_13
HVAEP1_T003584.2	OG0003972	NSMCE4A, EID3	ENSG00000107672, ENSG00000255150	NSE4 homolog A, SMC5-SMC6 complex component, EP300 interacting inhibitor of differentiation 3	NA	PTHR16140:SF0	NON-STRUCTURAL MAINTENANCE OF CHROMOSOMES ELEMENT 4	PF08743; PF15412	Nse4 C-terminal; Binding domain of Nse4/EID3 to Nse3-MAGE	NSE4A_BOVIN;Non-structural_maintenance_of_chromosomes_element_4_homolog_A
HVAEP1_T003586.1	OG0001821	ZER1	ENSG00000160445	zyg-11 related cell cycle regulator	NA	PTHR12904:SF23	PROTEIN ZER-1 HOMOLOG	NA	NA	ZER1_HUMAN;Protein_zer-1_homolog
HVAEP1_T003587.1	OG0000169	LMNTD1	ENSG00000152936	lamin tail domain containing 1	NA	NA	NA	NA	NA	NA
HVAEP1_T003588.1	OG0000169	LMNTD1	ENSG00000152936	lamin tail domain containing 1	NA	PTHR45721	LAMIN DM0-RELATED	PF00038	Intermediate filament protein	NA
HVAEP1_T003589.1	NA	NA	NA	NA	NA	PTHR11214:SF236	HEXOSYLTRANSFERASE	PF01762	Galactosyltransferase	B3GL1_HUMAN;UDP-GalNAc:beta-1,3-N-acetylgalactosaminyltransferase_1
HVAEP1_T003590.1	OG0004011	PSMB10, PSMB7	ENSG00000205220, ENSG00000136930	proteasome 20S subunit beta 7, proteasome 20S subunit beta 10	NA	PTHR11599:SF42	PROTEASOME SUBUNIT BETA TYPE-7	PF12465; PF00227	Proteasome beta subunits C terminal; Proteasome subunit	PSB7_MOUSE;Proteasome_subunit_beta_type-7
HVAEP1_T003591.1	OG0004011	PSMB10, PSMB7	ENSG00000205220, ENSG00000136930	proteasome 20S subunit beta 7, proteasome 20S subunit beta 10	NA	PTHR11599:SF42	PROTEASOME SUBUNIT BETA TYPE-7	PF12465; PF00227	Proteasome beta subunits C terminal; Proteasome subunit	PSB7_RAT;Proteasome_subunit_beta_type-7
HVAEP1_T003596.1	OG0000007	ZMYM1	ENSG00000197056	zinc finger MYM-type containing 1	NA	NA	NA	NA	NA	NA
HVAEP1_T003597.1	OG0000007	ZMYM1	ENSG00000197056	zinc finger MYM-type containing 1	NA	NA	NA	PF14291	Domain of unknown function (DUF4371)	ZMYM1_HUMAN;Zinc_finger_MYM-type_protein_1
HVAEP1_T003601.2	NA	NA	NA	NA	NA	PTHR11214:SF236	HEXOSYLTRANSFERASE	PF01762	Galactosyltransferase	B3GT1_GORGO;Beta-1,3-galactosyltransferase_1
HVAEP1_T003604.1	NA	NA	NA	NA	NA	PTHR11214:SF236	HEXOSYLTRANSFERASE	PF01762	Galactosyltransferase	B3GN2_HUMAN;N-acetyllactosaminide_beta-1,3-N-acetylglucosaminyltransferase_2
HVAEP1_T003605.1	OG0002198	FAM20B	ENSG00000116199	FAM20B glycosaminoglycan xylosylkinase	NA	PTHR12450:SF14	GLYCOSAMINOGLYCAN XYLOSYLKINASE	PF06702	Golgi casein kinase, C-terminal, Fam20	XYLK_DANRE;Glycosaminoglycan_xylosylkinase
HVAEP1_T003606.1	NA	NA	NA	NA	NA	NA	NA	PF13688; PF01562	Metallo-peptidase family M12; Reprolysin family propeptide	ADA10_PIG;Disintegrin_and_metalloproteinase_domain-containing_protein_10
HVAEP1_T003607.3	OG0000214	CENPA	ENSG00000115163	centromere protein A	NA	PTHR11426:SF191	HISTONE H3-LIKE CENTROMERIC PROTEIN A	PF00125	Core histone H2A/H2B/H3/H4	H32_CICIN;Histone_H3.2
HVAEP1_T003608.1	OG0000054	KIF18B, KIF18A	ENSG00000186185, ENSG00000121621	kinesin family member 18A, kinesin family member 18B	NA	PTHR24115:SF414	KINESIN-LIKE PROTEIN KIF18B	PF00225	Kinesin motor domain	KI18A_HUMAN;Kinesin-like_protein_KIF18A
HVAEP1_T003610.1	NA	NA	NA	NA	NA	NA	NA	PF05485	THAP domain	NA
HVAEP1_T003611.1	OG0000054	KIF18B, KIF18A	ENSG00000186185, ENSG00000121621	kinesin family member 18A, kinesin family member 18B	NA	PTHR24115:SF414	KINESIN-LIKE PROTEIN KIF18B	PF00225	Kinesin motor domain	KI18A_HUMAN;Kinesin-like_protein_KIF18A
HVAEP1_T003612.1	NA	NA	NA	NA	NA	NA	NA	PF05485	THAP domain	NA
HVAEP1_T003615.1	NA	NA	NA	NA	NA	NA	NA	PF00001	7 transmembrane receptor (rhodopsin family)	TAAR1_RAT;Trace_amine-associated_receptor_1
HVAEP1_T003618.3	OG0007380	SOHLH1, SOHLH2, CCDC169-SOHLH2	ENSG00000165643, ENSG00000120669, ENSG00000250709	spermatogenesis and oogenesis specific basic helix-loop-helix 2, CCDC169-SOHLH2 readthrough, spermatogenesis and oogenesis specific basic helix-loop-helix 1	NA	NA	NA	PF00010	Helix-loop-helix DNA-binding domain	SOLH2_MOUSE;Spermatogenesis-_and_oogenesis-specific_basic_helix-loop-helix-containing_protein_2
HVAEP1_T003619.1	NA	NA	NA	NA	NA	NA	NA	PF00001	7 transmembrane receptor (rhodopsin family)	HRH2_CAVPO;Histamine_H2_receptor
HVAEP1_T003620.1	OG0000445	RECQL	ENSG00000004700	RecQ like helicase	NA	PTHR13710:SF72	ATP-DEPENDENT DNA HELICASE Q1	PF00271; PF00270; PF16124	Helicase conserved C-terminal domain; DEAD/DEAH box helicase; RecQ zinc-binding	RECQ1_RAT;ATP-dependent_DNA_helicase_Q1
HVAEP1_T003621.1	OG0006847	NDUFB7	ENSG00000099795	NADH:ubiquinone oxidoreductase subunit B7	NA	PTHR20900	NADH:UBIQUINONE OXIDOREDUCTASE B18-LIKE SUBUNIT	PF05676	NADH-ubiquinone oxidoreductase B18 subunit (NDUFB7)	NDUB7_PANTR;NADH_dehydrogenase_[ubiquinone]_1_beta_subcomplex_subunit_7
HVAEP1_T003622.3	OG0002102	NUDT19	ENSG00000213965	nudix hydrolase 19	NA	PTHR12318	TESTOSTERONE-REGULATED PROTEIN RP2	NA	NA	NUD19_XENLA;Nucleoside_diphosphate-linked_moiety_X_motif_19
HVAEP1_T003625.1	OG0002102	NUDT19	ENSG00000213965	nudix hydrolase 19	NA	PTHR12318	TESTOSTERONE-REGULATED PROTEIN RP2	NA	NA	NUD19_XENLA;Nucleoside_diphosphate-linked_moiety_X_motif_19
HVAEP1_T003628.1	NA	NA	NA	NA	NA	NA	NA	PF12796	Ankyrin repeats (3 copies)	TNKS2_HUMAN;Poly_[ADP-ribose]_polymerase_tankyrase-2
HVAEP1_T003630.1	OG0005264	CFAP20DC	ENSG00000163689	CFAP20 domain containing	NA	PTHR12458:SF7	ZGC:162324	PF05018	Protein of unknown function (DUF667)	CF20D_RAT;Protein_CFAP20DC
HVAEP1_T003631.2	OG0002262	RGL3, RGL2, RGL2, RGL2, RGL2, RGL2, RALGDS, RGL4, RGL1	ENSG00000205517, ENSG00000237825, ENSG00000228736, ENSG00000206282, ENSG00000224841, ENSG00000237441, ENSG00000160271, ENSG00000159496, ENSG00000143344	ral guanine nucleotide dissociation stimulator like 2, ral guanine nucleotide dissociation stimulator like 4, ral guanine nucleotide dissociation stimulator, ral guanine nucleotide dissociation stimulator like 3, ral guanine nucleotide dissociation stimulator like 1	NA	PTHR23113:SF312	RAL GUANINE NUCLEOTIDE DISSOCIATION STIMULATOR-LIKE, ISOFORM E	PF00618; PF00788; PF00617	RasGEF N-terminal motif; Ras association (RalGDS/AF-6) domain; RasGEF domain	RGL1_DANRE;Ral_guanine_nucleotide_dissociation_stimulator-like_1
HVAEP1_T003632.1	OG0000357	ANKS1A, ANKS1B	ENSG00000064999, ENSG00000185046	ankyrin repeat and sterile alpha motif domain containing 1A, ankyrin repeat and sterile alpha motif domain containing 1B	NA	PTHR24174:SF3	ANKYRIN REPEAT AND STERILE ALPHA MOTIF DOMAIN-CONTAINING PROTEIN 1B	PF12796	Ankyrin repeats (3 copies)	ANS1B_RAT;Ankyrin_repeat_and_sterile_alpha_motif_domain-containing_protein_1B
HVAEP1_T003633.1	OG0000357	ANKS1A, ANKS1B	ENSG00000064999, ENSG00000185046	ankyrin repeat and sterile alpha motif domain containing 1A, ankyrin repeat and sterile alpha motif domain containing 1B	NA	PTHR24174:SF1	IP14385P	PF00536; PF00640	SAM domain (Sterile alpha motif); Phosphotyrosine interaction domain (PTB/PID)	ANS1B_DANRE;Ankyrin_repeat_and_sterile_alpha_motif_domain-containing_protein_1B
HVAEP1_T003637.1	NA	NA	NA	NA	NA	NA	NA	PF00955; PF07565	HCO3- transporter family; Band 3 cytoplasmic domain	S4A4_MOUSE;Electrogenic_sodium_bicarbonate_cotransporter_1
HVAEP1_T003640.1	OG0000071	Tsp74F	FBgn0036769	NA	NA	PTHR19282:SF442	CD151 ANTIGEN	PF00335	Tetraspanin family	CD151_MOUSE;CD151_antigen
HVAEP1_T003645.1	OG0006364	PPP1R15B, PPP1R15A	ENSG00000158615, ENSG00000087074	protein phosphatase 1 regulatory subunit 15A, protein phosphatase 1 regulatory subunit 15B	NA	NA	NA	NA	NA	NA
HVAEP1_T003646.1	OG0001794	SAFB, SAFB2, SLTM	ENSG00000160633, ENSG00000130254, ENSG00000137776	SAFB like transcription modulator, scaffold attachment factor B2, scaffold attachment factor B	NA	PTHR15683:SF8	SCAFFOLD ATTACHMENT FACTOR B, ISOFORM B	PF02037; PF00076	SAP domain; RNA recognition motif. (a.k.a. RRM, RBD, or RNP domain)	SAFB2_HUMAN;Scaffold_attachment_factor_B2
HVAEP1_T003647.1	OG0002143	MSH4	ENSG00000057468	mutS homolog 4	NA	PTHR11361:SF21	MUTS PROTEIN HOMOLOG 4	PF05190; PF05192; PF00488; PF05188	MutS family domain IV; MutS domain III; MutS domain V; MutS domain II	MSH4_HUMAN;MutS_protein_homolog_4
HVAEP1_T003648.2	NA	NA	NA	NA	NA	PTHR47958:SF62	DEAD-BOX ATP-DEPENDENT RNA HELICASE 37-LIKE ISOFORM X1	PF00271; PF00270	Helicase conserved C-terminal domain; DEAD/DEAH box helicase	DDX4_PELLE;Probable_ATP-dependent_RNA_helicase_DDX4
HVAEP1_T003649.1	NA	NA	NA	NA	NA	PTHR47958:SF62	DEAD-BOX ATP-DEPENDENT RNA HELICASE 37-LIKE ISOFORM X1	PF00270; PF00271	DEAD/DEAH box helicase; Helicase conserved C-terminal domain	DDX4_PELLE;Probable_ATP-dependent_RNA_helicase_DDX4
HVAEP1_T003651.1	NA	NA	NA	NA	NA	PTHR10574:SF233	LAMININ SUBUNIT BETA-1	PF00055; PF00052; PF00053	Laminin N-terminal (Domain VI); Laminin B (Domain IV); Laminin EGF domain	LAMB1_MOUSE;Laminin_subunit_beta-1
HVAEP1_T003652.1	NA	NA	NA	NA	NA	PTHR23226:SF269	ZINC FINGER AND SCAN DOMAIN CONTAINING 2	PF00096	Zinc finger, C2H2 type	NA
HVAEP1_T003653.1	NA	NA	NA	NA	NA	PTHR22883:SF301	PALMITOYLTRANSFERASE ZDHHC12-RELATED	PF01529	DHHC palmitoyltransferase	ZD12B_DANRE;Palmitoyltransferase_ZDHHC12-B
HVAEP1_T003654.1	OG0005895	C19orf12	ENSG00000131943	chromosome 19 open reading frame 12	NA	PTHR31493	NAZO FAMILY MEMBER	NA	NA	NA
HVAEP1_T003657.1	OG0000556	PITPNA, PITPNB	ENSG00000174238, ENSG00000180957	phosphatidylinositol transfer protein beta, phosphatidylinositol transfer protein alpha	NA	PTHR10658:SF58	VIBRATOR, ISOFORM B	PF02121	Phosphatidylinositol transfer protein	PIPNA_BOVIN;Phosphatidylinositol_transfer_protein_alpha_isoform
HVAEP1_T003658.2	OG0006017	FBXO47	ENSG00000204952	F-box protein 47	NA	PTHR34098	F-BOX ONLY PROTEIN 47	NA	NA	FBX47_MOUSE;F-box_only_protein_47
HVAEP1_T003659.1	OG0000556	PITPNA, PITPNB	ENSG00000174238, ENSG00000180957	phosphatidylinositol transfer protein beta, phosphatidylinositol transfer protein alpha	NA	PTHR10658:SF58	VIBRATOR, ISOFORM B	PF02121	Phosphatidylinositol transfer protein	PIPNA_BOVIN;Phosphatidylinositol_transfer_protein_alpha_isoform
HVAEP1_T003660.1	OG0002285	AP2A2, AP2A2, AP2A2, AP2A1	ENSG00000280759, ENSG00000281385, ENSG00000183020, ENSG00000196961	adaptor related protein complex 2 subunit alpha 2, adaptor related protein complex 2 subunit alpha 1	NA	PTHR22780:SF33	AP-2 COMPLEX SUBUNIT ALPHA-1	PF01602	Adaptin N terminal region	AP2A_ANOGA;AP-2_complex_subunit_alpha
HVAEP1_T003661.2	OG0002285	AP2A2, AP2A2, AP2A2, AP2A1	ENSG00000280759, ENSG00000281385, ENSG00000183020, ENSG00000196961	adaptor related protein complex 2 subunit alpha 2, adaptor related protein complex 2 subunit alpha 1	NA	PTHR22780:SF30	AP-2 COMPLEX SUBUNIT ALPHA-2	PF02883; PF02296; PF01602	Adaptin C-terminal domain; Alpha adaptin AP2, C-terminal domain; Adaptin N terminal region	AP2A2_RAT;AP-2_complex_subunit_alpha-2
HVAEP1_T003662.2	OG0003728	CFAP157	ENSG00000160401	cilia and flagella associated protein 157	NA	PTHR31954	CILIA- AND FLAGELLA-ASSOCIATED PROTEIN 157	NA	NA	CF157_XENTR;Cilia-_and_flagella-associated_protein_157
HVAEP1_T003664.1	NA	NA	NA	NA	NA	NA	NA	PF00822	PMP-22/EMP/MP20/Claudin family	NA
HVAEP1_T003665.1	OG0003368	ALAD	ENSG00000148218	aminolevulinate dehydratase	NA	PTHR11458	DELTA-AMINOLEVULINIC ACID DEHYDRATASE	PF00490	Delta-aminolevulinic acid dehydratase	HEM2_MACFA;Delta-aminolevulinic_acid_dehydratase
HVAEP1_T003666.1	OG0000471	RABGAP1, RABGAP1L	ENSG00000011454, ENSG00000152061	RAB GTPase activating protein 1, RAB GTPase activating protein 1 like	NA	PTHR22957:SF439	RAB GTPASE-ACTIVATING PROTEIN 1	PF00640; PF12473; PF00566	Phosphotyrosine interaction domain (PTB/PID); Kinesin protein; Rab-GTPase-TBC domain	RBGP1_PONAB;Rab_GTPase-activating_protein_1
HVAEP1_T003668.1	NA	NA	NA	NA	NA	NA	NA	NA	NA	YPD1_CAEEL;Uncharacterized_protein_C05D11.1
HVAEP1_T003669.1	OG0004989	C05D11.1	WBGene00015481	hypothetical protein	NA	PTHR43016:SF13	PRESEQUENCE PROTEASE, MITOCHONDRIAL	PF08367; PF05193	Peptidase M16C associated; Peptidase M16 inactive domain	YPD1_CAEEL;Uncharacterized_protein_C05D11.1
HVAEP1_T003672.1	NA	NA	NA	NA	NA	PTHR14226:SF23	PATATIN-LIKE PHOSPHOLIPASE DOMAIN-CONTAINING PROTEIN 7	PF01734; PF00027	Patatin-like phospholipase; Cyclic nucleotide-binding domain	PLPL7_MOUSE;Patatin-like_phospholipase_domain-containing_protein_7
HVAEP1_T003673.1	NA	NA	NA	NA	NA	NA	NA	PF01094; PF00003	Receptor family ligand binding region; 7 transmembrane sweet-taste receptor of 3 GCPR	GRM3_RAT;Metabotropic_glutamate_receptor_3
HVAEP1_T003674.1	NA	NA	NA	NA	NA	NA	NA	PF14291	Domain of unknown function (DUF4371)	ZMYM1_HUMAN;Zinc_finger_MYM-type_protein_1
HVAEP1_T003675.2	OG0000153	ABCA2	ENSG00000107331	ATP binding cassette subfamily A member 2	NA	PTHR19229:SF225	ATP-BINDING CASSETTE SUB-FAMILY A MEMBER 2	PF00005; PF12698	ABC transporter; ABC-2 family transporter protein	ABCA2_HUMAN;ATP-binding_cassette_sub-family_A_member_2
HVAEP1_T003678.2	OG0004663	RPL27A	ENSG00000166441	ribosomal protein L27a	NA	PTHR11721:SF13	60S RIBOSOMAL PROTEIN L27A	PF00828	Ribosomal proteins 50S-L15, 50S-L18e, 60S-L27A	RL27A_XENLA;60S_ribosomal_protein_L27a
HVAEP1_T003679.1	NA	NA	NA	NA	NA	NA	NA	PF01266	FAD dependent oxidoreductase	NA
HVAEP1_T003680.2	OG0003178	NDOR1	ENSG00000188566	NADPH dependent diflavin oxidoreductase 1	NA	PTHR19384:SF10	NADPH-DEPENDENT DIFLAVIN OXIDOREDUCTASE 1	PF00175; PF00258; PF00667	Oxidoreductase NAD-binding domain; Flavodoxin; FAD binding domain	NDOR1_DANRE;NADPH-dependent_diflavin_oxidoreductase_1
HVAEP1_T003681.1	OG0010120	ZNF618	ENSG00000157657	zinc finger protein 618	NA	NA	NA	NA	NA	ZN618_MOUSE;Zinc_finger_protein_618
HVAEP1_T003687.1	NA	NA	NA	NA	NA	PTHR34047:SF3	BLR2052 PROTEIN	NA	NA	YKFC_ECOLI;Protein_YkfC
HVAEP1_T003691.1	NA	NA	NA	NA	NA	NA	NA	PF03184	DDE superfamily endonuclease	CLZ9_COCLU;MFS-type_transporter_clz9
HVAEP1_T003692.1	NA	NA	NA	NA	NA	NA	NA	PF07885; PF00041; PF00090	Ion channel; Fibronectin type III domain; Thrombospondin type 1 domain	HMCN1_MOUSE;Hemicentin-1
HVAEP1_T003693.1	NA	NA	NA	NA	NA	PTHR13723:SF142	A DISINTEGRIN AND METALLOPROTEINASE WITH THROMBOSPONDIN MOTIFS 7	PF00090; PF00431; PF01421; PF17771	Thrombospondin type 1 domain; CUB domain; Reprolysin (M12B) family zinc metalloprotease; ADAM cysteine-rich domain	ATS6_HUMAN;A_disintegrin_and_metalloproteinase_with_thrombospondin_motifs_6
HVAEP1_T003694.1	OG0000642	Y6B3B.7	WBGene00012391	hypothetical protein	NA	NA	NA	NA	NA	NA
HVAEP1_T003696.2	OG0004067	CG42748	FBgn0261802	NA	NA	NA	NA	NA	NA	NA
HVAEP1_T003697.1	OG0004067	CG42748	FBgn0261802	NA	NA	PTHR21517	UNCHARACTERIZED	NA	NA	AJM1_MOUSE;Apical_junction_component_1_homolog
HVAEP1_T003698.1	OG0005441	SEC22B	ENSG00000265808	SEC22 homolog B, vesicle trafficking protein	NA	PTHR45837	VESICLE-TRAFFICKING PROTEIN SEC22B	PF13774; PF00957	Regulated-SNARE-like domain; Synaptobrevin	SC22B_CHICK;Vesicle-trafficking_protein_SEC22b
HVAEP1_T003700.1	OG0000927	POLE3	ENSG00000148229	DNA polymerase epsilon 3, accessory subunit	NA	PTHR46172	DNA POLYMERASE EPSILON SUBUNIT 3	PF00808	Histone-like transcription factor (CBF/NF-Y) and archaeal histone	DPOE3_RAT;DNA_polymerase_epsilon_subunit_3
HVAEP1_T003701.1	OG0001105	NXNL2, NXNL1	ENSG00000130045, ENSG00000171773	nucleoredoxin like 2, nucleoredoxin like 1	NA	PTHR46762	NUCLEOREDOXIN-LIKE PROTEIN 2	PF13905	Thioredoxin-like	NXNL2_MOUSE;Nucleoredoxin-like_protein_2
HVAEP1_T003709.1	OG0001305	FLOT1, FLOT1, FLOT1, FLOT1, FLOT1, FLOT1, FLOT1, FLOT1	ENSG00000236271, ENSG00000223654, ENSG00000230143, ENSG00000206379, ENSG00000232280, ENSG00000206480, ENSG00000137312, ENSG00000224740	flotillin 1	NA	PTHR13806:SF16	FLOTILLIN-1	PF01145	SPFH domain / Band 7 family	FLOT1_DROME;Flotillin-1
HVAEP1_T003711.1	OG0001305	FLOT1, FLOT1, FLOT1, FLOT1, FLOT1, FLOT1, FLOT1, FLOT1	ENSG00000236271, ENSG00000223654, ENSG00000230143, ENSG00000206379, ENSG00000232280, ENSG00000206480, ENSG00000137312, ENSG00000224740	flotillin 1	NA	PTHR13806:SF16	FLOTILLIN-1	PF15975; PF01145	Flotillin; SPFH domain / Band 7 family	FLOT1_DROME;Flotillin-1
HVAEP1_T003712.5	OG0000516	SYNGAP1, SYNGAP1, DAB2IP, RASAL2, RASAL3	ENSG00000227460, ENSG00000197283, ENSG00000136848, ENSG00000075391, ENSG00000105122	synaptic Ras GTPase activating protein 1, DAB2 interacting protein, RAS protein activator like 3, RAS protein activator like 2	NA	PTHR10194:SF125	RAS GTPASE-ACTIVATING PROTEIN-RELATED	PF00168; PF12004; PF00616	C2 domain; Domain of unknown function (DUF3498); GTPase-activator protein for Ras-like GTPase	DAB2P_MOUSE;Disabled_homolog_2-interacting_protein
HVAEP1_T003714.1	NA	NA	NA	NA	NA	PTHR24216:SF27	TRANSFORMING GROWTH FACTOR BETA-1-INDUCED TRANSCRIPT 1 PROTEIN	PF00412	LIM domain	TGFI1_BOVIN;Transforming_growth_factor_beta-1-induced_transcript_1_protein
HVAEP1_T003715.2	OG0006660	CCNB1IP1	ENSG00000100814	cyclin B1 interacting protein 1	NA	PTHR14305	E3 UBIQUITIN-PROTEIN LIGASE CCNB1IP1	PF14634	zinc-RING finger domain	CIP1_MOUSE;E3_ubiquitin-protein_ligase_CCNB1IP1
HVAEP1_T003716.1	OG0002681	ADPGK	ENSG00000159322	ADP dependent glucokinase	NA	PTHR21208:SF0	ADP-DEPENDENT GLUCOKINASE	PF04587	ADP-specific Phosphofructokinase/Glucokinase conserved region	ADPGK_MOUSE;ADP-dependent_glucokinase
HVAEP1_T003719.1	OG0003438	FAM102B, FAM102A	ENSG00000162636, ENSG00000167106	family with sequence similarity 102 member A, family with sequence similarity 102 member B	NA	PTHR21456	FAMILY WITH SEQUENCE SIMILARITY 102	NA	NA	F102B_HUMAN;Protein_FAM102B
HVAEP1_T003720.1	OG0001223	PAQR9	ENSG00000188582	progestin and adipoQ receptor family member 9	NA	PTHR20855:SF58	MEMBRANE PROGESTIN RECEPTOR EPSILON	PF03006	Haemolysin-III related	PAQR5_HUMAN;Membrane_progestin_receptor_gamma
HVAEP1_T003721.1	OG0001223	PAQR9	ENSG00000188582	progestin and adipoQ receptor family member 9	NA	PTHR20855:SF58	MEMBRANE PROGESTIN RECEPTOR EPSILON	PF03006	Haemolysin-III related	MPRGA_DANRE;Membrane_progestin_receptor_gamma-A
HVAEP1_T003723.1	OG0004704	DDX56	ENSG00000136271	DEAD-box helicase 56	NA	PTHR24031:SF96	ATP-DEPENDENT RNA HELICASE DDX56-RELATED	PF00271; PF00270	Helicase conserved C-terminal domain; DEAD/DEAH box helicase	DDX56_HUMAN;Probable_ATP-dependent_RNA_helicase_DDX56
HVAEP1_T003725.2	OG0000252	DAZL, DAZ3, DAZ2, DAZ1, DAZ4	ENSG00000092345, ENSG00000187191, ENSG00000205944, ENSG00000188120, ENSG00000205916	deleted in azoospermia 4, deleted in azoospermia 3, deleted in azoospermia 1, deleted in azoospermia 2, deleted in azoospermia like	NA	PTHR11176:SF14	PROTEIN BOULE	PF00076	RNA recognition motif. (a.k.a. RRM, RBD, or RNP domain)	DAZ1_CAEEL;DAZ_protein_1
HVAEP1_T003727.1	OG0002574	UHRF1BP1, UHRF1BP1L	ENSG00000065060, ENSG00000111647	UHRF1 binding protein 1, UHRF1 binding protein 1 like	NA	PTHR22774:SF17	UHRF1-BINDING PROTEIN 1-LIKE	PF12624	N-terminal region of Chorein or VPS13	UH1BL_XENLA;UHRF1-binding_protein_1-like
HVAEP1_T003729.1	NA	NA	NA	NA	NA	PTHR24067:SF248	DORSAL INTERACTING PROTEIN 4	PF00179	Ubiquitin-conjugating enzyme	UBC9A_DANRE;SUMO-conjugating_enzyme_UBC9-A
HVAEP1_T003730.1	NA	NA	NA	NA	LN868213.1; Myc3 (myc3 gene), strain Jussy	NA	NA	PF00010	Helix-loop-helix DNA-binding domain	MYC_TADBR;Myc_proto-oncogene_protein
HVAEP1_T003731.1	OG0002544	TLCD1, TLCD2, TLCD2	ENSG00000160606, ENSG00000275246, ENSG00000185561	TLC domain containing 2, TLC domain containing 1	NA	PTHR13439:SF4	TLC DOMAIN-CONTAINING PROTEIN FLD-1	PF03798	TLC domain	TLCD2_DANRE;TLC_domain-containing_protein_2
HVAEP1_T003732.1	NA	NA	NA	NA	NA	PTHR23050:SF401	CALMODULIN	PF13499	EF-hand domain pair	CALM_GLOSP;Calmodulin
HVAEP1_T003737.1	OG0005390	NELFE, NELFE, NELFE, NELFE, NELFE, NELFE	ENSG00000233801, ENSG00000229363, ENSG00000206268, ENSG00000231044, ENSG00000206357, ENSG00000204356	negative elongation factor complex member E	NA	PTHR17250	NEGATIVE ELONGATION FACTOR E	PF00076	RNA recognition motif. (a.k.a. RRM, RBD, or RNP domain)	NELFE_DROME;Negative_elongation_factor_E
HVAEP1_T003738.1	OG0000590	USP33, USP20	ENSG00000077254, ENSG00000136878	ubiquitin specific peptidase 20, ubiquitin specific peptidase 33	NA	PTHR24006:SF823	UBIQUITINYL HYDROLASE 1	PF00443	Ubiquitin carboxyl-terminal hydrolase	UBP20_XENTR;Ubiquitin_carboxyl-terminal_hydrolase_20
HVAEP1_T003742.1	NA	NA	NA	NA	NA	PTHR33053:SF18	AGAP000105-PA	NA	NA	NA
HVAEP1_T003744.1	OG0003437	RPL35	ENSG00000136942	ribosomal protein L35	NA	PTHR45722	60S RIBOSOMAL PROTEIN L35	PF00831	Ribosomal L29 protein	RL35_MOUSE;60S_ribosomal_protein_L35
HVAEP1_T003747.1	OG0001235	HLTF	ENSG00000071794	helicase like transcription factor	NA	PTHR45626:SF39	HELICASE-LIKE TRANSCRIPTION FACTOR	PF00176; PF13920; PF00271	SNF2 family N-terminal domain; Zinc finger, C3HC4 type (RING finger); Helicase conserved C-terminal domain	HLTF_HUMAN;Helicase-like_transcription_factor
HVAEP1_T003748.1	OG0001235	HLTF	ENSG00000071794	helicase like transcription factor	NA	PTHR45626:SF39	HELICASE-LIKE TRANSCRIPTION FACTOR	PF08797	HIRAN domain	HLTF_RABIT;Helicase-like_transcription_factor
HVAEP1_T003749.1	NA	NA	NA	NA	NA	PTHR18867	RAD50	PF04423; PF13476	Rad50 zinc hook motif; AAA domain	RAD50_HUMAN;DNA_repair_protein_RAD50
HVAEP1_T003750.1	OG0003729	CNTRL	ENSG00000119397	centriolin	NA	NA	NA	NA	NA	NA
HVAEP1_T003752.1	OG0003729	CNTRL	ENSG00000119397	centriolin	NA	NA	NA	NA	NA	NA
HVAEP1_T003753.1	NA	NA	NA	NA	NA	PTHR18867	RAD50	NA	NA	RAD50_HUMAN;DNA_repair_protein_RAD50
HVAEP1_T003755.1	OG0004566	TYMS	ENSG00000176890	thymidylate synthetase	NA	PTHR11548:SF2	THYMIDYLATE SYNTHASE	PF00303	Thymidylate synthase	TYSY_MOUSE;Thymidylate_synthase
HVAEP1_T003757.1	NA	NA	NA	NA	NA	NA	NA	PF13488	Glycine zipper	NA
HVAEP1_T003758.1	NA	NA	NA	NA	NA	PTHR22762:SF63	MALTASE-GLUCOAMYLASE, INTESTINAL	PF01055; PF00088; PF16863; PF13802	Glycosyl hydrolases family 31; Trefoil (P-type) domain; N-terminal barrel of NtMGAM and CtMGAM, maltase-glucoamylase; Galactose mutarotase-like	LYAG_RAT;Lysosomal_alpha-glucosidase
HVAEP1_T003759.1	NA	NA	NA	NA	NA	PTHR22762:SF63	MALTASE-GLUCOAMYLASE, INTESTINAL	PF01055; PF00088; PF16863; PF13802	Glycosyl hydrolases family 31; Trefoil (P-type) domain; N-terminal barrel of NtMGAM and CtMGAM, maltase-glucoamylase; Galactose mutarotase-like	LYAG_RAT;Lysosomal_alpha-glucosidase
HVAEP1_T003760.1	NA	NA	NA	NA	NA	PTHR22762:SF63	MALTASE-GLUCOAMYLASE, INTESTINAL	PF01055; PF16863; PF13802	Glycosyl hydrolases family 31; N-terminal barrel of NtMGAM and CtMGAM, maltase-glucoamylase; Galactose mutarotase-like	LYAG_RAT;Lysosomal_alpha-glucosidase
HVAEP1_T003761.1	NA	NA	NA	NA	NA	PTHR22762:SF92	LYSOSOMAL ALPHA-GLUCOSIDASE	PF01055	Glycosyl hydrolases family 31	LYAG_RAT;Lysosomal_alpha-glucosidase
HVAEP1_T003762.1	NA	NA	NA	NA	NA	PTHR22762:SF133	ACID ALPHA GLUCOSIDASE RELATE	PF01055	Glycosyl hydrolases family 31	SUIS_HUMAN;Sucrase-isomaltase,_intestinal
HVAEP1_T003763.1	OG0000033	CYP4V2	ENSG00000145476	cytochrome P450 family 4 subfamily V member 2	NA	PTHR24291:SF157	CYTOCHROME P450 4V2	PF00067	Cytochrome P450	CP4V2_MOUSE;Cytochrome_P450_4V2
HVAEP1_T003764.1	OG0002169	CDK5RAP2, PDE4DIP	ENSG00000136861, ENSG00000178104	CDK5 regulatory subunit associated protein 2, phosphodiesterase 4D interacting protein	NA	PTHR46930	CDK5 REGULATORY SUBUNIT-ASSOCIATED PROTEIN 2	PF07989	Centrosomin N-terminal motif 1	CK5P2_RAT;CDK5_regulatory_subunit-associated_protein_2
HVAEP1_T003766.2	OG0005971	DNLZ	ENSG00000213221	DNL-type zinc finger	NA	PTHR20922:SF13	DNL-TYPE ZINC FINGER PROTEIN	PF05180	DNL zinc finger	DNLZ_DANRE;DNL-type_zinc_finger_protein
HVAEP1_T003768.1	OG0002409	DDX39B, DDX39B, DDX39B, DDX39B, DDX39B, DDX39B, DDX39B, DDX39B, DDX39A	ENSG00000237889, ENSG00000235439, ENSG00000229496, ENSG00000230624, ENSG00000225859, ENSG00000225073, ENSG00000215425, ENSG00000198563, ENSG00000123136	DExD-box helicase 39B, DExD-box helicase 39A	NA	PTHR47958:SF10	ATP-DEPENDENT RNA HELICASE DDX39A	PF00270; PF00271	DEAD/DEAH box helicase; Helicase conserved C-terminal domain	DX39B_CANLF;Spliceosome_RNA_helicase_DDX39B
HVAEP1_T003770.1	NA	NA	NA	NA	NA	NA	NA	NA	NA	B4GN3_MOUSE;Beta-1,4-N-acetylgalactosaminyltransferase_3
HVAEP1_T003771.1	NA	NA	NA	NA	NA	NA	NA	PF00040	Fibronectin type II domain	NA
HVAEP1_T003773.1	OG0007898	SYCE2	ENSG00000161860	synaptonemal complex central element protein 2	KC580661.1; synaptonemal complex central element protein 2 (Syce2)	PTHR28398	SYNAPTONEMAL COMPLEX CENTRAL ELEMENT PROTEIN 2	NA	NA	SYCE2_MOUSE;Synaptonemal_complex_central_element_protein_2
HVAEP1_T003774.1	OG0007233	FBXL18	ENSG00000155034	F-box and leucine rich repeat protein 18	NA	NA	NA	PF12937	F-box-like	FXL18_HUMAN;F-box/LRR-repeat_protein_18
HVAEP1_T003775.1	OG0000752	CTSD, NAPSA	ENSG00000117984, ENSG00000131400	cathepsin D, napsin A aspartic peptidase	NA	PTHR47966:SF42	CATHEPSIN D	PF00026	Eukaryotic aspartyl protease	CATD_CLUHA;Cathepsin_D
HVAEP1_T003777.1	OG0001553	HPS5, HPS5	ENSG00000288445, ENSG00000110756	HPS5 biogenesis of lysosomal organelles complex 2 subunit 2	NA	NA	NA	NA	NA	HPS5_DROPS;Hermansky-Pudlak_syndrome_5_protein_homolog
HVAEP1_T003780.1	OG0001553	HPS5, HPS5	ENSG00000288445, ENSG00000110756	HPS5 biogenesis of lysosomal organelles complex 2 subunit 2	NA	PTHR23287:SF18	HERMANSKY-PUDLAK SYNDROME 5 PROTEIN	NA	NA	HPS5_MOUSE;Hermansky-Pudlak_syndrome_5_protein_homolog
HVAEP1_T003781.1	OG0000798	PPIL3	ENSG00000240344	peptidylprolyl isomerase like 3	NA	PTHR45625:SF2	PEPTIDYL-PROLYL CIS-TRANS ISOMERASE-LIKE 3	PF00160	Cyclophilin type peptidyl-prolyl cis-trans isomerase/CLD	PPIL3_CHICK;Peptidyl-prolyl_cis-trans_isomerase-like_3
HVAEP1_T003782.2	OG0005229	HMCES	ENSG00000183624	5-hydroxymethylcytosine binding, ES cell specific	NA	PTHR13604	DC12-RELATED	PF02586	SOS response associated peptidase (SRAP)	HMCES_CHICK;Abasic_site_processing_protein_HMCES
HVAEP1_T003783.1	OG0005086	TRMT5	ENSG00000126814	tRNA methyltransferase 5	NA	PTHR23245:SF36	TRNA (GUANINE(37)-N1)-METHYLTRANSFERASE	PF02475	Met-10+ like-protein	TRM5_BOVIN;tRNA_(guanine(37)-N1)-methyltransferase
HVAEP1_T003784.1	OG0001038	MAN1B1	ENSG00000177239	mannosidase alpha class 1B member 1	NA	PTHR11742:SF55	ENDOPLASMIC RETICULUM MANNOSYL-OLIGOSACCHARIDE 1,2-ALPHA-MANNOSIDASE	PF01532	Glycosyl hydrolase family 47	MA1B1_RAT;Endoplasmic_reticulum_mannosyl-oligosaccharide_1,2-alpha-mannosidase
HVAEP1_T003785.1	OG0002343	FNBP1L, TRIP10, FNBP1	ENSG00000137942, ENSG00000125733, ENSG00000187239	thyroid hormone receptor interactor 10, formin binding protein 1, formin binding protein 1 like	NA	NA	NA	PF00018; PF00611	SH3 domain; Fes/CIP4, and EFC/F-BAR homology domain	FBP1L_XENLA;Formin-binding_protein_1-like
HVAEP1_T003790.2	OG0001120	CG4558	FBgn0029914	NA	NA	PTHR12480:SF38	IP10855P	NA	NA	NA
HVAEP1_T003794.1	NA	NA	NA	NA	NA	NA	NA	PF00001	7 transmembrane receptor (rhodopsin family)	ADRB2_MOUSE;Beta-2_adrenergic_receptor
HVAEP1_T003795.1	OG0000570	INPP5E	ENSG00000148384	inositol polyphosphate-5-phosphatase E	NA	PTHR47039	INOSITOL POLYPHOSPHATE 5-PHOSPHATASE E	NA	NA	INP5E_MOUSE;Phosphatidylinositol_polyphosphate_5-phosphatase_type_IV
HVAEP1_T003796.1	OG0003518	GTF2H4, GTF2H4, GTF2H4, GTF2H4, GTF2H4, GTF2H4	ENSG00000234370, ENSG00000233149, ENSG00000226384, ENSG00000236895, ENSG00000221974, ENSG00000213780	general transcription factor IIH subunit 4	NA	PTHR13152	TFIIH, POLYPEPTIDE 4	PF18307; PF03849	Transcription factor Tfb2 (p52) C-terminal domain; Transcription factor Tfb2	TF2H4_MOUSE;General_transcription_factor_IIH_subunit_4
HVAEP1_T003797.1	OG0001434	RUVBL2	ENSG00000183207	RuvB like AAA ATPase 2	NA	PTHR11093:SF2	RUVB-LIKE 2	PF17856; PF06068	TIP49 AAA-lid domain; TIP49 P-loop domain	RUVB2_XENLA;RuvB-like_2
HVAEP1_T003799.1	NA	NA	NA	NA	NA	PTHR11267:SF91	T-BOX TRANSCRIPTION FACTOR TBX3	PF00907	T-box	TBX2_CAEEL;T-box_protein_2
HVAEP1_T003800.1	NA	NA	NA	NA	NA	PTHR11267:SF107	OPTOMOTOR-BLIND PROTEIN	PF00907	T-box	TBX6_XENTR;T-box_transcription_factor_TBX6
HVAEP1_T003802.1	OG0004727	MORN5	ENSG00000185681	MORN repeat containing 5	NA	PTHR11267:SF91	T-BOX TRANSCRIPTION FACTOR TBX3	PF00907; PF02493	T-box; MORN repeat	MORN5_BOVIN;MORN_repeat-containing_protein_5
HVAEP1_T003803.1	NA	NA	NA	NA	NA	PTHR10696:SF21	L-ASPARAGINE OXYGENASE	PF02668	Taurine catabolism dioxygenase TauD, TfdA family	DDAC_ENTAG;Dapdiamide_synthesis_protein_DdaC
HVAEP1_T003804.1	NA	NA	NA	NA	NA	NA	NA	PF00001	7 transmembrane receptor (rhodopsin family)	AA2BR_RAT;Adenosine_receptor_A2b
HVAEP1_T003807.1	NA	NA	NA	NA	NA	PTHR31025:SF17	SI:CH211-196P9.1	NA	NA	NA
HVAEP1_T003808.1	NA	NA	NA	NA	NA	NA	NA	PF00001	7 transmembrane receptor (rhodopsin family)	OPSD_ALLMI;Rhodopsin
HVAEP1_T003809.3	OG0003675	AP3M1, AP3M2	ENSG00000185009, ENSG00000070718	adaptor related protein complex 3 subunit mu 2, adaptor related protein complex 3 subunit mu 1	NA	PTHR10529:SF342	AP-3 COMPLEX SUBUNIT MU-1	PF00928	Adaptor complexes medium subunit family	AP3M1_HUMAN;AP-3_complex_subunit_mu-1
HVAEP1_T003810.1	OG0002181	CEP350	ENSG00000135837	centrosomal protein 350	NA	PTHR13958:SF3	CENTROSOMAL PROTEIN 350	PF01302	CAP-Gly domain	CE350_HUMAN;Centrosome-associated_protein_350
HVAEP1_T003811.1	OG0001612	UBE2M	ENSG00000130725	ubiquitin conjugating enzyme E2 M	NA	PTHR24068:SF315	NEDD8-CONJUGATING ENZYME UBC12	PF00179	Ubiquitin-conjugating enzyme	UBC12_BOVIN;NEDD8-conjugating_enzyme_Ubc12
HVAEP1_T003812.1	OG0000738	TBC1D13	ENSG00000107021	TBC1 domain family member 13	NA	PTHR22957:SF27	TBC1 DOMAIN FAMILY MEMBER 13	PF00566	Rab-GTPase-TBC domain	TBC13_HUMAN;TBC1_domain_family_member_13
HVAEP1_T003813.1	NA	NA	NA	NA	NA	PTHR23113:SF329	RAS-SPECIFIC GUANINE NUCLEOTIDE-RELEASING FACTOR RALGPS1-LIKE PROTEIN	PF00617	RasGEF domain	GEFY_DICDI;Ras_guanine_nucleotide_exchange_factor_Y
HVAEP1_T003814.1	OG0001077	CECR2	ENSG00000099954	CECR2 histone acetyl-lysine reader	NA	PTHR47092	CAT EYE SYNDROME CRITICAL REGION PROTEIN 2	PF00439	Bromodomain	CECR2_MOUSE;Cat_eye_syndrome_critical_region_protein_2_homolog
HVAEP1_T003815.1	OG0005940	CDC7	ENSG00000097046	cell division cycle 7	NA	PTHR11909:SF7	CELL DIVISION CYCLE 7-RELATED PROTEIN KINASE	PF00069	Protein kinase domain	CDC7_MOUSE;Cell_division_cycle_7-related_protein_kinase
HVAEP1_T003816.1	NA	NA	NA	NA	NA	PTHR43294:SF13	SODIUM/POTASSIUM-TRANSPORTING ATPASE SUBUNIT ALPHA	PF00122	E1-E2 ATPase	AT1A_TAESO;Sodium/potassium-transporting_ATPase_subunit_alpha
HVAEP1_T003817.1	NA	NA	NA	NA	NA	PTHR43294:SF13	SODIUM/POTASSIUM-TRANSPORTING ATPASE SUBUNIT ALPHA	PF00122; PF00690	E1-E2 ATPase; Cation transporter/ATPase, N-terminus	AT12A_HUMAN;Potassium-transporting_ATPase_alpha_chain_2
HVAEP1_T003818.5	NA	NA	NA	NA	NA	PTHR21590	UNCHARACTERIZED	PF12877	Domain of unknown function (DUF3827)	NA
HVAEP1_T003819.1	OG0000033	CYP4V2	ENSG00000145476	cytochrome P450 family 4 subfamily V member 2	NA	PTHR24291:SF157	CYTOCHROME P450 4V2	PF00067	Cytochrome P450	CP4V2_RAT;Cytochrome_P450_4V2
HVAEP1_T003821.2	OG0003467	CFAP94	ENSG00000118307	dynein axonemal intermediate chain 7	NA	PTHR20929	LUNG ADENOMA SUSCEPTIBILITY 1-RELATED	PF15927	Cancer susceptibility candidate 1 N-terminus	DNAI7_BOVIN;Dynein_axonemal_intermediate_chain_7
HVAEP1_T003822.1	OG0001779	CSNK2B, CSNK2B, CSNK2B	ENSG00000230700, ENSG00000232960, ENSG00000204435	casein kinase 2 beta	NA	PTHR11740	CASEIN KINASE II SUBUNIT BETA	PF01214	Casein kinase II regulatory subunit	CSK2B_BOVIN;Casein_kinase_II_subunit_beta
HVAEP1_T003823.1	OG0006661	CCDC18	ENSG00000122483	coiled-coil domain containing 18	NA	NA	NA	NA	NA	NA
HVAEP1_T003824.2	OG0004263	SYCP3	ENSG00000139351	synaptonemal complex protein 3	JQ906933.1; synaptonemal complex protein 3 (Sycp3)	PTHR19368:SF15	SYNAPTONEMAL COMPLEX PROTEIN 3	PF04803	Cor1/Xlr/Xmr conserved region	SYCP3_HUMAN;Synaptonemal_complex_protein_3
HVAEP1_T003825.1	OG0001749	PACSIN3, PACSIN1, PACSIN2	ENSG00000165912, ENSG00000124507, ENSG00000100266	protein kinase C and casein kinase substrate in neurons 2, protein kinase C and casein kinase substrate in neurons 1, protein kinase C and casein kinase substrate in neurons 3	NA	PTHR23065:SF11	SYNDAPIN, ISOFORM C	PF00611; PF14604	Fes/CIP4, and EFC/F-BAR homology domain; Variant SH3 domain	PACN2_CHICK;Protein_kinase_C_and_casein_kinase_substrate_in_neurons_protein_2
HVAEP1_T003826.1	OG0001611	UCHL5	ENSG00000116750	ubiquitin C-terminal hydrolase L5	NA	PTHR10589:SF16	UBIQUITIN CARBOXYL-TERMINAL HYDROLASE ISOZYME L5	PF01088; PF18031	Ubiquitin carboxyl-terminal hydrolase, family 1; Ubiquitin carboxyl-terminal hydrolases	UCHL5_BOVIN;Ubiquitin_carboxyl-terminal_hydrolase_isozyme_L5
HVAEP1_T003829.1	NA	NA	NA	NA	NA	NA	NA	PF00240	Ubiquitin family	UBB_GORGO;Polyubiquitin-B
HVAEP1_T003831.1	OG0000128	CASP8, CASP10	ENSG00000064012, ENSG00000003400	caspase 10, caspase 8	NA	PTHR10454:SF209	CASPASE-18/A	PF00656; PF01335	Caspase domain; Death effector domain	CASP8_MOUSE;Caspase-8
HVAEP1_T003832.2	OG0000128	CASP8, CASP10	ENSG00000064012, ENSG00000003400	caspase 10, caspase 8	NA	PTHR10454:SF209	CASPASE-18/A	PF01335; PF00656	Death effector domain; Caspase domain	CASP8_RAT;Caspase-8
HVAEP1_T003833.1	NA	NA	NA	NA	NA	NA	NA	PF01335	Death effector domain	NA
HVAEP1_T003839.1	OG0000128	csp-2, csp-3	WBGene00000820, WBGene00000821	Putative inactive caspase subunit p14, Non-catalytic caspase homolog csp-3	NA	NA	NA	PF00656	Caspase domain	NA
HVAEP1_T003841.1	NA	NA	NA	NA	NA	NA	NA	PF00078	Reverse transcriptase (RNA-dependent DNA polymerase)	RTBS_DROME;Probable_RNA-directed_DNA_polymerase_from_transposon_BS
HVAEP1_T003847.1	NA	NA	NA	NA	NA	NA	NA	PF00531	Death domain	NA
HVAEP1_T003849.1	NA	NA	NA	NA	NA	NA	NA	PF00531	Death domain	NA
HVAEP1_T003852.1	NA	NA	NA	NA	NA	NA	NA	PF16064	Domain of unknown function (DUF4806)	NA
HVAEP1_T003853.1	NA	NA	NA	NA	NA	PTHR33053:SF18	AGAP000105-PA	NA	NA	NA
HVAEP1_T003855.1	NA	NA	NA	NA	NA	NA	NA	PF02902	Ulp1 protease family, C-terminal catalytic domain	NA
HVAEP1_T003858.1	NA	NA	NA	NA	NA	NA	NA	PF00069	Protein kinase domain	CDKE1_ARATH;Cyclin-dependent_kinase_E-1
HVAEP1_T003860.2	NA	NA	NA	NA	NA	NA	NA	PF16064	Domain of unknown function (DUF4806)	NA
HVAEP1_T003861.1	OG0000128	CASP8, CASP10	ENSG00000064012, ENSG00000003400	caspase 10, caspase 8	NA	PTHR10454:SF209	CASPASE-18/A	PF00656	Caspase domain	CASP8_MOUSE;Caspase-8
HVAEP1_T003862.1	NA	NA	NA	NA	NA	NA	NA	PF00531	Death domain	NA
HVAEP1_T003864.3	OG0000128	CASP8, CASP10	ENSG00000064012, ENSG00000003400	caspase 10, caspase 8	NA	PTHR10454:SF209	CASPASE-18/A	PF00656; PF01335	Caspase domain; Death effector domain	CASP7_HUMAN;Caspase-7
HVAEP1_T003867.1	OG0000128	CASP8, CASP10	ENSG00000064012, ENSG00000003400	caspase 10, caspase 8	NA	PTHR10454:SF209	CASPASE-18/A	PF00656	Caspase domain	CASP8_RAT;Caspase-8
HVAEP1_T003869.1	NA	NA	NA	NA	NA	NA	NA	PF14291; PF05699	Domain of unknown function (DUF4371); hAT family C-terminal dimerisation region	P52K_HUMAN;52_kDa_repressor_of_the_inhibitor_of_the_protein_kinase
HVAEP1_T003871.4	NA	NA	NA	NA	NA	PTHR10454:SF210	CASPASE-RELATED	PF00656	Caspase domain	CASP8_RAT;Caspase-8
[truncated: 13,976 more rows]

## Sheet: TF IPR
Hydra vulgaris Transcript ID	Analysis Type	Signature Accession	Signature Description	Start Location	Stop Location	Score	InterPro Accession	InterPro Descriptioins	GO Annotations	Pathways Annotations
HVAEP1_T002059.1	Pfam	PF05225	helix-turn-helix, Psq domain	69	96	6.5e-05	IPR007889	DNA binding HTH domain, Psq-type	GO:0003677	-
HVAEP1_T020345.1	ProSiteProfiles	PS50157	Zinc finger C2H2 type domain profile.	1	29	8.829	IPR013087	Zinc finger C2H2-type	-	MetaCyc: PWY-102|MetaCyc: PWY-1061|MetaCyc: PWY-1187|MetaCyc: PWY-2083|MetaCyc: PWY-3542|MetaCyc: PWY-4021|MetaCyc: PWY-4161|MetaCyc: PWY-5035|MetaCyc: PWY-5036|MetaCyc: PWY-5047|MetaCyc: PWY-5059|MetaCyc: PWY-5070|MetaCyc: PWY-5105|MetaCyc: PWY-5209|MetaCyc: PWY-5287|MetaCyc: PWY-5301|MetaCyc: PWY-5305|MetaCyc: PWY-5349|MetaCyc: PWY-5392|MetaCyc: PWY-5479|MetaCyc: PWY-5665|MetaCyc: PWY-5729|Meta…
HVAEP1_T020345.1	ProSitePatterns	PS00028	Zinc finger C2H2 type domain signature.	34	57	-	IPR013087	Zinc finger C2H2-type	-	MetaCyc: PWY-102|MetaCyc: PWY-1061|MetaCyc: PWY-1187|MetaCyc: PWY-2083|MetaCyc: PWY-3542|MetaCyc: PWY-4021|MetaCyc: PWY-4161|MetaCyc: PWY-5035|MetaCyc: PWY-5036|MetaCyc: PWY-5047|MetaCyc: PWY-5059|MetaCyc: PWY-5070|MetaCyc: PWY-5105|MetaCyc: PWY-5209|MetaCyc: PWY-5287|MetaCyc: PWY-5301|MetaCyc: PWY-5305|MetaCyc: PWY-5349|MetaCyc: PWY-5392|MetaCyc: PWY-5479|MetaCyc: PWY-5665|MetaCyc: PWY-5729|Meta…
HVAEP1_T020345.1	SMART	SM00355	c2h2final6	1	24	14	IPR013087	Zinc finger C2H2-type	-	MetaCyc: PWY-102|MetaCyc: PWY-1061|MetaCyc: PWY-1187|MetaCyc: PWY-2083|MetaCyc: PWY-3542|MetaCyc: PWY-4021|MetaCyc: PWY-4161|MetaCyc: PWY-5035|MetaCyc: PWY-5036|MetaCyc: PWY-5047|MetaCyc: PWY-5059|MetaCyc: PWY-5070|MetaCyc: PWY-5105|MetaCyc: PWY-5209|MetaCyc: PWY-5287|MetaCyc: PWY-5301|MetaCyc: PWY-5305|MetaCyc: PWY-5349|MetaCyc: PWY-5392|MetaCyc: PWY-5479|MetaCyc: PWY-5665|MetaCyc: PWY-5729|Meta…
HVAEP1_T020345.1	SMART	SM00355	c2h2final6	32	57	0.16	IPR013087	Zinc finger C2H2-type	-	MetaCyc: PWY-102|MetaCyc: PWY-1061|MetaCyc: PWY-1187|MetaCyc: PWY-2083|MetaCyc: PWY-3542|MetaCyc: PWY-4021|MetaCyc: PWY-4161|MetaCyc: PWY-5035|MetaCyc: PWY-5036|MetaCyc: PWY-5047|MetaCyc: PWY-5059|MetaCyc: PWY-5070|MetaCyc: PWY-5105|MetaCyc: PWY-5209|MetaCyc: PWY-5287|MetaCyc: PWY-5301|MetaCyc: PWY-5305|MetaCyc: PWY-5349|MetaCyc: PWY-5392|MetaCyc: PWY-5479|MetaCyc: PWY-5665|MetaCyc: PWY-5729|Meta…
HVAEP1_T020345.1	ProSitePatterns	PS00028	Zinc finger C2H2 type domain signature.	2	24	-	IPR013087	Zinc finger C2H2-type	-	MetaCyc: PWY-102|MetaCyc: PWY-1061|MetaCyc: PWY-1187|MetaCyc: PWY-2083|MetaCyc: PWY-3542|MetaCyc: PWY-4021|MetaCyc: PWY-4161|MetaCyc: PWY-5035|MetaCyc: PWY-5036|MetaCyc: PWY-5047|MetaCyc: PWY-5059|MetaCyc: PWY-5070|MetaCyc: PWY-5105|MetaCyc: PWY-5209|MetaCyc: PWY-5287|MetaCyc: PWY-5301|MetaCyc: PWY-5305|MetaCyc: PWY-5349|MetaCyc: PWY-5392|MetaCyc: PWY-5479|MetaCyc: PWY-5665|MetaCyc: PWY-5729|Meta…
HVAEP1_T020345.1	ProSiteProfiles	PS50157	Zinc finger C2H2 type domain profile.	32	59	8.808	IPR013087	Zinc finger C2H2-type	-	MetaCyc: PWY-102|MetaCyc: PWY-1061|MetaCyc: PWY-1187|MetaCyc: PWY-2083|MetaCyc: PWY-3542|MetaCyc: PWY-4021|MetaCyc: PWY-4161|MetaCyc: PWY-5035|MetaCyc: PWY-5036|MetaCyc: PWY-5047|MetaCyc: PWY-5059|MetaCyc: PWY-5070|MetaCyc: PWY-5105|MetaCyc: PWY-5209|MetaCyc: PWY-5287|MetaCyc: PWY-5301|MetaCyc: PWY-5305|MetaCyc: PWY-5349|MetaCyc: PWY-5392|MetaCyc: PWY-5479|MetaCyc: PWY-5665|MetaCyc: PWY-5729|Meta…
HVAEP1_T023009.1	PRINTS	PR00024	Homeobox signature	171	182	4.1e-06	IPR020479	Homeobox domain, metazoa	GO:0003677	Reactome: R-DME-8853884|Reactome: R-HSA-2032785|Reactome: R-HSA-210745|Reactome: R-HSA-210746|Reactome: R-HSA-210747|Reactome: R-HSA-381771|Reactome: R-HSA-5578768|Reactome: R-HSA-5617472|Reactome: R-HSA-8939902|Reactome: R-HSA-9010553
HVAEP1_T023009.1	PRINTS	PR00024	Homeobox signature	196	205	4.1e-06	IPR020479	Homeobox domain, metazoa	GO:0003677	Reactome: R-DME-8853884|Reactome: R-HSA-2032785|Reactome: R-HSA-210745|Reactome: R-HSA-210746|Reactome: R-HSA-210747|Reactome: R-HSA-381771|Reactome: R-HSA-5578768|Reactome: R-HSA-5617472|Reactome: R-HSA-8939902|Reactome: R-HSA-9010553
HVAEP1_T023009.1	PRINTS	PR00024	Homeobox signature	186	196	4.1e-06	IPR020479	Homeobox domain, metazoa	GO:0003677	Reactome: R-DME-8853884|Reactome: R-HSA-2032785|Reactome: R-HSA-210745|Reactome: R-HSA-210746|Reactome: R-HSA-210747|Reactome: R-HSA-381771|Reactome: R-HSA-5578768|Reactome: R-HSA-5617472|Reactome: R-HSA-8939902|Reactome: R-HSA-9010553
HVAEP1_T023009.1	ProSitePatterns	PS00027	'Homeobox' domain signature.	182	205	-	IPR017970	Homeobox, conserved site	GO:0000981|GO:0006355	Reactome: R-CEL-2173795|Reactome: R-CEL-6807505|Reactome: R-CEL-8853884|Reactome: R-CEL-8939245|Reactome: R-DME-3214847|Reactome: R-DME-6804759|Reactome: R-DME-6807505|Reactome: R-DME-8853884|Reactome: R-DME-8939245|Reactome: R-DME-8941855|Reactome: R-DME-9018519|Reactome: R-HSA-1839117|Reactome: R-HSA-2032785|Reactome: R-HSA-210745|Reactome: R-HSA-210746|Reactome: R-HSA-210747|Reactome: R-HSA-25…
HVAEP1_T023009.1	SMART	SM00389	HOX_1	149	211	1.5e-20	IPR001356	Homeobox domain	GO:0003677	MetaCyc: PWY-361|MetaCyc: PWY-4801|MetaCyc: PWY-4922|MetaCyc: PWY-5048|MetaCyc: PWY-5129|MetaCyc: PWY-5139|MetaCyc: PWY-5268|MetaCyc: PWY-5284|MetaCyc: PWY-5292|MetaCyc: PWY-5307|MetaCyc: PWY-5313|MetaCyc: PWY-5353|MetaCyc: PWY-5400|MetaCyc: PWY-5437|MetaCyc: PWY-5473|MetaCyc: PWY-5475|MetaCyc: PWY-5477|MetaCyc: PWY-5660|MetaCyc: PWY-5710|MetaCyc: PWY-5794|MetaCyc: PWY-5846|MetaCyc: PWY-5875|Meta…
HVAEP1_T023009.1	Pfam	PF00046	Homeodomain	150	206	8.5e-19	IPR001356	Homeobox domain	GO:0003677	MetaCyc: PWY-361|MetaCyc: PWY-4801|MetaCyc: PWY-4922|MetaCyc: PWY-5048|MetaCyc: PWY-5129|MetaCyc: PWY-5139|MetaCyc: PWY-5268|MetaCyc: PWY-5284|MetaCyc: PWY-5292|MetaCyc: PWY-5307|MetaCyc: PWY-5313|MetaCyc: PWY-5353|MetaCyc: PWY-5400|MetaCyc: PWY-5437|MetaCyc: PWY-5473|MetaCyc: PWY-5475|MetaCyc: PWY-5477|MetaCyc: PWY-5660|MetaCyc: PWY-5710|MetaCyc: PWY-5794|MetaCyc: PWY-5846|MetaCyc: PWY-5875|Meta…
HVAEP1_T023009.1	CDD	cd00086	homeodomain	150	206	1.41687e-17	IPR001356	Homeobox domain	GO:0003677	MetaCyc: PWY-361|MetaCyc: PWY-4801|MetaCyc: PWY-4922|MetaCyc: PWY-5048|MetaCyc: PWY-5129|MetaCyc: PWY-5139|MetaCyc: PWY-5268|MetaCyc: PWY-5284|MetaCyc: PWY-5292|MetaCyc: PWY-5307|MetaCyc: PWY-5313|MetaCyc: PWY-5353|MetaCyc: PWY-5400|MetaCyc: PWY-5437|MetaCyc: PWY-5473|MetaCyc: PWY-5475|MetaCyc: PWY-5477|MetaCyc: PWY-5660|MetaCyc: PWY-5710|MetaCyc: PWY-5794|MetaCyc: PWY-5846|MetaCyc: PWY-5875|Meta…
HVAEP1_T023009.1	ProSiteProfiles	PS50071	'Homeobox' domain profile.	147	207	19.969	IPR001356	Homeobox domain	GO:0003677	MetaCyc: PWY-361|MetaCyc: PWY-4801|MetaCyc: PWY-4922|MetaCyc: PWY-5048|MetaCyc: PWY-5129|MetaCyc: PWY-5139|MetaCyc: PWY-5268|MetaCyc: PWY-5284|MetaCyc: PWY-5292|MetaCyc: PWY-5307|MetaCyc: PWY-5313|MetaCyc: PWY-5353|MetaCyc: PWY-5400|MetaCyc: PWY-5437|MetaCyc: PWY-5473|MetaCyc: PWY-5475|MetaCyc: PWY-5477|MetaCyc: PWY-5660|MetaCyc: PWY-5710|MetaCyc: PWY-5794|MetaCyc: PWY-5846|MetaCyc: PWY-5875|Meta…
HVAEP1_T027276.1	PANTHER	PTHR10270	SOX TRANSCRIPTION FACTOR	27	209	7e-26	-	-
HVAEP1_T027276.1	PANTHER	PTHR10270:SF305	SOX21A, ISOFORM B-RELATED	27	209	7e-26	-	-
HVAEP1_T027276.1	SMART	SM00398	hmgende2	47	117	3.8e-13	IPR009071	High mobility group box domain	-	Reactome: R-BTA-140342|Reactome: R-BTA-5686938|Reactome: R-BTA-6798695|Reactome: R-CEL-112382|Reactome: R-CEL-140342|Reactome: R-CEL-201722|Reactome: R-CEL-3769402|Reactome: R-CEL-4086398|Reactome: R-CEL-4641265|Reactome: R-CEL-5686938|Reactome: R-CEL-674695|Reactome: R-CEL-6796648|Reactome: R-CEL-6798695|Reactome: R-CEL-6804756|Reactome: R-CEL-75955|Reactome: R-CEL-8853884|Reactome: R-CEL-895143…
HVAEP1_T027276.1	ProSiteProfiles	PS50118	HMG boxes A and B DNA-binding domains profile.	48	116	16.234	IPR009071	High mobility group box domain	-	Reactome: R-BTA-140342|Reactome: R-BTA-5686938|Reactome: R-BTA-6798695|Reactome: R-CEL-112382|Reactome: R-CEL-140342|Reactome: R-CEL-201722|Reactome: R-CEL-3769402|Reactome: R-CEL-4086398|Reactome: R-CEL-4641265|Reactome: R-CEL-5686938|Reactome: R-CEL-674695|Reactome: R-CEL-6796648|Reactome: R-CEL-6798695|Reactome: R-CEL-6804756|Reactome: R-CEL-75955|Reactome: R-CEL-8853884|Reactome: R-CEL-895143…
HVAEP1_T027276.1	Pfam	PF00505	HMG (high mobility group) box	48	114	4.9e-17	IPR009071	High mobility group box domain	-	Reactome: R-BTA-140342|Reactome: R-BTA-5686938|Reactome: R-BTA-6798695|Reactome: R-CEL-112382|Reactome: R-CEL-140342|Reactome: R-CEL-201722|Reactome: R-CEL-3769402|Reactome: R-CEL-4086398|Reactome: R-CEL-4641265|Reactome: R-CEL-5686938|Reactome: R-CEL-674695|Reactome: R-CEL-6796648|Reactome: R-CEL-6798695|Reactome: R-CEL-6804756|Reactome: R-CEL-75955|Reactome: R-CEL-8853884|Reactome: R-CEL-895143…
HVAEP1_T027276.1	SUPERFAMILY	SSF47095	HMG-box	48	127	1.28e-18	IPR036910	High mobility group box domain superfamily	-	Reactome: R-BTA-140342|Reactome: R-BTA-5686938|Reactome: R-BTA-6798695|Reactome: R-CEL-112382|Reactome: R-CEL-140342|Reactome: R-CEL-201722|Reactome: R-CEL-3769402|Reactome: R-CEL-4086398|Reactome: R-CEL-4641265|Reactome: R-CEL-5686938|Reactome: R-CEL-674695|Reactome: R-CEL-6796648|Reactome: R-CEL-6798695|Reactome: R-CEL-6804756|Reactome: R-CEL-75955|Reactome: R-CEL-8853884|Reactome: R-CEL-895143…
HVAEP1_T010978.1	ProSitePatterns	PS00028	Zinc finger C2H2 type domain signature.	92	114	-	IPR013087	Zinc finger C2H2-type	-	MetaCyc: PWY-102|MetaCyc: PWY-1061|MetaCyc: PWY-1187|MetaCyc: PWY-2083|MetaCyc: PWY-3542|MetaCyc: PWY-4021|MetaCyc: PWY-4161|MetaCyc: PWY-5035|MetaCyc: PWY-5036|MetaCyc: PWY-5047|MetaCyc: PWY-5059|MetaCyc: PWY-5070|MetaCyc: PWY-5105|MetaCyc: PWY-5209|MetaCyc: PWY-5287|MetaCyc: PWY-5301|MetaCyc: PWY-5305|MetaCyc: PWY-5349|MetaCyc: PWY-5392|MetaCyc: PWY-5479|MetaCyc: PWY-5665|MetaCyc: PWY-5729|Meta…
HVAEP1_T010978.1	ProSitePatterns	PS00028	Zinc finger C2H2 type domain signature.	20	40	-	IPR013087	Zinc finger C2H2-type	-	MetaCyc: PWY-102|MetaCyc: PWY-1061|MetaCyc: PWY-1187|MetaCyc: PWY-2083|MetaCyc: PWY-3542|MetaCyc: PWY-4021|MetaCyc: PWY-4161|MetaCyc: PWY-5035|MetaCyc: PWY-5036|MetaCyc: PWY-5047|MetaCyc: PWY-5059|MetaCyc: PWY-5070|MetaCyc: PWY-5105|MetaCyc: PWY-5209|MetaCyc: PWY-5287|MetaCyc: PWY-5301|MetaCyc: PWY-5305|MetaCyc: PWY-5349|MetaCyc: PWY-5392|MetaCyc: PWY-5479|MetaCyc: PWY-5665|MetaCyc: PWY-5729|Meta…
HVAEP1_T010978.1	ProSiteProfiles	PS50157	Zinc finger C2H2 type domain profile.	60	89	13.318	IPR013087	Zinc finger C2H2-type	-	MetaCyc: PWY-102|MetaCyc: PWY-1061|MetaCyc: PWY-1187|MetaCyc: PWY-2083|MetaCyc: PWY-3542|MetaCyc: PWY-4021|MetaCyc: PWY-4161|MetaCyc: PWY-5035|MetaCyc: PWY-5036|MetaCyc: PWY-5047|MetaCyc: PWY-5059|MetaCyc: PWY-5070|MetaCyc: PWY-5105|MetaCyc: PWY-5209|MetaCyc: PWY-5287|MetaCyc: PWY-5301|MetaCyc: PWY-5305|MetaCyc: PWY-5349|MetaCyc: PWY-5392|MetaCyc: PWY-5479|MetaCyc: PWY-5665|MetaCyc: PWY-5729|Meta…
HVAEP1_T010978.1	SMART	SM00355	c2h2final6	18	40	0.0011	IPR013087	Zinc finger C2H2-type	-	MetaCyc: PWY-102|MetaCyc: PWY-1061|MetaCyc: PWY-1187|MetaCyc: PWY-2083|MetaCyc: PWY-3542|MetaCyc: PWY-4021|MetaCyc: PWY-4161|MetaCyc: PWY-5035|MetaCyc: PWY-5036|MetaCyc: PWY-5047|MetaCyc: PWY-5059|MetaCyc: PWY-5070|MetaCyc: PWY-5105|MetaCyc: PWY-5209|MetaCyc: PWY-5287|MetaCyc: PWY-5301|MetaCyc: PWY-5305|MetaCyc: PWY-5349|MetaCyc: PWY-5392|MetaCyc: PWY-5479|MetaCyc: PWY-5665|MetaCyc: PWY-5729|Meta…
HVAEP1_T010978.1	SMART	SM00355	c2h2final6	60	84	0.019	IPR013087	Zinc finger C2H2-type	-	MetaCyc: PWY-102|MetaCyc: PWY-1061|MetaCyc: PWY-1187|MetaCyc: PWY-2083|MetaCyc: PWY-3542|MetaCyc: PWY-4021|MetaCyc: PWY-4161|MetaCyc: PWY-5035|MetaCyc: PWY-5036|MetaCyc: PWY-5047|MetaCyc: PWY-5059|MetaCyc: PWY-5070|MetaCyc: PWY-5105|MetaCyc: PWY-5209|MetaCyc: PWY-5287|MetaCyc: PWY-5301|MetaCyc: PWY-5305|MetaCyc: PWY-5349|MetaCyc: PWY-5392|MetaCyc: PWY-5479|MetaCyc: PWY-5665|MetaCyc: PWY-5729|Meta…
HVAEP1_T010978.1	SMART	SM00355	c2h2final6	90	114	0.01	IPR013087	Zinc finger C2H2-type	-	MetaCyc: PWY-102|MetaCyc: PWY-1061|MetaCyc: PWY-1187|MetaCyc: PWY-2083|MetaCyc: PWY-3542|MetaCyc: PWY-4021|MetaCyc: PWY-4161|MetaCyc: PWY-5035|MetaCyc: PWY-5036|MetaCyc: PWY-5047|MetaCyc: PWY-5059|MetaCyc: PWY-5070|MetaCyc: PWY-5105|MetaCyc: PWY-5209|MetaCyc: PWY-5287|MetaCyc: PWY-5301|MetaCyc: PWY-5305|MetaCyc: PWY-5349|MetaCyc: PWY-5392|MetaCyc: PWY-5479|MetaCyc: PWY-5665|MetaCyc: PWY-5729|Meta…
HVAEP1_T010978.1	Pfam	PF00096	Zinc finger, C2H2 type	18	40	3.1e-05	IPR013087	Zinc finger C2H2-type	-	MetaCyc: PWY-102|MetaCyc: PWY-1061|MetaCyc: PWY-1187|MetaCyc: PWY-2083|MetaCyc: PWY-3542|MetaCyc: PWY-4021|MetaCyc: PWY-4161|MetaCyc: PWY-5035|MetaCyc: PWY-5036|MetaCyc: PWY-5047|MetaCyc: PWY-5059|MetaCyc: PWY-5070|MetaCyc: PWY-5105|MetaCyc: PWY-5209|MetaCyc: PWY-5287|MetaCyc: PWY-5301|MetaCyc: PWY-5305|MetaCyc: PWY-5349|MetaCyc: PWY-5392|MetaCyc: PWY-5479|MetaCyc: PWY-5665|MetaCyc: PWY-5729|Meta…
HVAEP1_T010978.1	Pfam	PF00096	Zinc finger, C2H2 type	90	114	0.0055	IPR013087	Zinc finger C2H2-type	-	MetaCyc: PWY-102|MetaCyc: PWY-1061|MetaCyc: PWY-1187|MetaCyc: PWY-2083|MetaCyc: PWY-3542|MetaCyc: PWY-4021|MetaCyc: PWY-4161|MetaCyc: PWY-5035|MetaCyc: PWY-5036|MetaCyc: PWY-5047|MetaCyc: PWY-5059|MetaCyc: PWY-5070|MetaCyc: PWY-5105|MetaCyc: PWY-5209|MetaCyc: PWY-5287|MetaCyc: PWY-5301|MetaCyc: PWY-5305|MetaCyc: PWY-5349|MetaCyc: PWY-5392|MetaCyc: PWY-5479|MetaCyc: PWY-5665|MetaCyc: PWY-5729|Meta…
HVAEP1_T010978.1	ProSiteProfiles	PS50157	Zinc finger C2H2 type domain profile.	18	45	13.63	IPR013087	Zinc finger C2H2-type	-	MetaCyc: PWY-102|MetaCyc: PWY-1061|MetaCyc: PWY-1187|MetaCyc: PWY-2083|MetaCyc: PWY-3542|MetaCyc: PWY-4021|MetaCyc: PWY-4161|MetaCyc: PWY-5035|MetaCyc: PWY-5036|MetaCyc: PWY-5047|MetaCyc: PWY-5059|MetaCyc: PWY-5070|MetaCyc: PWY-5105|MetaCyc: PWY-5209|MetaCyc: PWY-5287|MetaCyc: PWY-5301|MetaCyc: PWY-5305|MetaCyc: PWY-5349|MetaCyc: PWY-5392|MetaCyc: PWY-5479|MetaCyc: PWY-5665|MetaCyc: PWY-5729|Meta…
HVAEP1_T010978.1	ProSiteProfiles	PS50157	Zinc finger C2H2 type domain profile.	90	119	11.635	IPR013087	Zinc finger C2H2-type	-	MetaCyc: PWY-102|MetaCyc: PWY-1061|MetaCyc: PWY-1187|MetaCyc: PWY-2083|MetaCyc: PWY-3542|MetaCyc: PWY-4021|MetaCyc: PWY-4161|MetaCyc: PWY-5035|MetaCyc: PWY-5036|MetaCyc: PWY-5047|MetaCyc: PWY-5059|MetaCyc: PWY-5070|MetaCyc: PWY-5105|MetaCyc: PWY-5209|MetaCyc: PWY-5287|MetaCyc: PWY-5301|MetaCyc: PWY-5305|MetaCyc: PWY-5349|MetaCyc: PWY-5392|MetaCyc: PWY-5479|MetaCyc: PWY-5665|MetaCyc: PWY-5729|Meta…
HVAEP1_T010978.1	ProSitePatterns	PS00028	Zinc finger C2H2 type domain signature.	62	84	-	IPR013087	Zinc finger C2H2-type	-	MetaCyc: PWY-102|MetaCyc: PWY-1061|MetaCyc: PWY-1187|MetaCyc: PWY-2083|MetaCyc: PWY-3542|MetaCyc: PWY-4021|MetaCyc: PWY-4161|MetaCyc: PWY-5035|MetaCyc: PWY-5036|MetaCyc: PWY-5047|MetaCyc: PWY-5059|MetaCyc: PWY-5070|MetaCyc: PWY-5105|MetaCyc: PWY-5209|MetaCyc: PWY-5287|MetaCyc: PWY-5301|MetaCyc: PWY-5305|MetaCyc: PWY-5349|MetaCyc: PWY-5392|MetaCyc: PWY-5479|MetaCyc: PWY-5665|MetaCyc: PWY-5729|Meta…
HVAEP1_T002928.2	Pfam	PF02892	BED zinc finger	9	50	3.8e-07	IPR003656	Zinc finger, BED-type	GO:0003677	MetaCyc: PWY-6289|MetaCyc: PWY-6462|MetaCyc: PWY-6463|MetaCyc: PWY-6682|MetaCyc: PWY-6841|MetaCyc: PWY-7815|MetaCyc: PWY-7816|MetaCyc: PWY-7817|MetaCyc: PWY-7818|MetaCyc: PWY-7887|Reactome: R-CEL-4551638|Reactome: R-HSA-4551638
HVAEP1_T002928.2	ProSiteProfiles	PS50808	Zinc finger BED-type profile.	5	56	9.908	IPR003656	Zinc finger, BED-type	GO:0003677	MetaCyc: PWY-6289|MetaCyc: PWY-6462|MetaCyc: PWY-6463|MetaCyc: PWY-6682|MetaCyc: PWY-6841|MetaCyc: PWY-7815|MetaCyc: PWY-7816|MetaCyc: PWY-7817|MetaCyc: PWY-7818|MetaCyc: PWY-7887|Reactome: R-CEL-4551638|Reactome: R-HSA-4551638
HVAEP1_T001458.1	Pfam	PF14465	NFRKB Winged Helix-like	311	411	1.5e-13	IPR025220	NFRKB winged helix-like domain	-	Reactome: R-HSA-5689603|Reactome: R-HSA-5696394|Reactome: R-MMU-5689603|Reactome: R-MMU-5696394|Reactome: R-XTR-5689603|Reactome: R-XTR-5696394
[truncated: 4,575 more rows]

## Sheet: Legend
Supplemental Data S1. Excel worksheet containing functional annotation data for the H. vulgaris strain AEP gene models. The first tab contains the combined results from our OrthoFinder, InterProScan, and BLAST annotation approaches. For these annotations, the longest isoform was used as the representative sequence for each gene. For the OrthoFinder results, the assigned orthogroup is included alo…
