# Supplementary material for: A chromosome-scale epigenetic map of the Hydra genome reveals conserved regulators of cell state
Source: HighWire-hosted journal article supplement (doi:10.1101/gr.277040.122), 2023-01-13
Supplement: Supplemental_Data_S2.xlsx [file Supplemental_Data_S2.xlsx]

## Sheet: AEP to 105
Query	Target	Strand	Q-len	Q-start	Q-stop	T-len	T-start	T-stop
CM039215.1	chr-1	-	65793045	289758	65758725	81026817	171842	80671882
JAGKSS010000045.1	chr-1	-	24911	3	20181	81026817	81003101	81023279
JAGKSS010000019.1	chr-2	-	65458	1736	8946	74586745	5021035	5177777
CM039217.1	chr-2	+	59913004	107661	59811541	74586745	80200	74455301
JAGKSS010000026.1	chr-2	+	44439	6	14209	74586745	56121397	58650554
JAGKSS010000040.1	chr-2	-	26537	1117	12162	74586745	58791478	58797850
JAGKSS010000052.1	chr-3	-	24214	8	23949	70017893	20038191	20498889
CM039214.1	chr-3	+	62712309	59109	62562164	70017893	126723	69970666
CM039223.1	chr-4	-	49247934	110341	49154121	52414368	107	52362294
JAGKSS010000032.1	chr-4	+	30347	1855	19200	52414368	40605708	43523860
JAGKSS010000050.1	chr-5	+	26634	18345	22177	43941197	7477971	7481830
JAGKSS010000047.1	chr-5	+	33110	6597	18354	43941197	2817074	31738675
CM039226.1	chr-5	-	42201620	118537	42172105	43941197	557889	43768316
JAGKSS010000042.1	chr-5	-	20001	6	19941	43941197	24147934	24166852
JAGKSS010000033.1	chr-6	-	26083	19524	22047	62381154	5675274	5677898
JAGKSS010000037.1	chr-6	-	23179	15589	22895	62381154	11457912	41239654
CM039219.1	chr-6	-	52021744	3545	51975535	62381154	290301	62182100
JAGKSS010000036.1	chr-6	+	22402	23	15002	62381154	10861944	51041943
CM039225.1	chr-7	+	39157883	38168	38774645	41470725	279348	41261481
JAGKSS010000051.1	chr-7	-	20770	6523	7656	41470725	20739773	20740866
JAGKSS010000023.1	chr-7	+	48518	677	46983	41470725	23849262	40038931
JAGKSS010000028.1	chr-8	-	42676	5	42670	59555380	14449281	14549908
JAGKSS010000020.1	chr-8	-	48274	11	48273	59555380	6611092	16782921
JAGKSS010000024.1	chr-8	+	43483	0	43469	59555380	25836788	28223574
CM039222.1	chr-8	-	51488711	116109	51354227	59555380	126341	59533570
JAGKSS010000039.1	chr-8	+	22868	594	8758	59555380	41918871	41925947
JAGKSS010000041.1	chr-8	-	23991	1	23989	59555380	44303230	44697232
JAGKSS010000022.1	chr-9	+	48166	3883	44564	63789909	11309939	45899413
CM039216.1	chr-9	+	60726905	211346	60716717	63789909	211657	63694823
JAGKSS010000025.1	chr-9	+	51168	15034	34243	63789909	29204685	57900363
JAGKSS010000048.1	chr-9	-	30099	342	29983	63789909	43616463	43808765
JAGKSS010000043.1	chr-9	+	32638	13881	17233	63789909	36274058	60847762
JAGKSS010000030.1	chr-9	+	38055	150	33566	63789909	58888527	63684188
JAGKSS010000044.1	chr-10	-	30343	6062	14054	54536456	811	6980
JAGKSS010000046.1	chr-10	+	23676	10711	22833	54536456	9366869	9368084
CM039221.1	chr-10	+	50363522	15163	50319597	54536456	182086	54534200
JAGKSS010000017.1	chr-10	+	24112	13073	19511	54536456	25963238	35693301
JAGKSS010000031.1	chr-10	+	33047	18823	24884	54536456	41730618	41737700
JAGKSS010000016.1	chr-11	+	64034	22608	44974	56258654	6153789	11265345
JAGKSS010000034.1	chr-11	-	26059	18286	25268	56258654	4233566	20921862
CM039218.1	chr-11	+	55045248	18831	54838018	56258654	590848	56251724
CM039213.1	chr-12	-	77975161	6894	77975152	85887368	431455	85826851
JAGKSS010000021.1	chr-12	+	48582	2736	38121	85887368	17988247	83060967
JAGKSS010000029.1	chr-13	+	39579	24522	34009	55696070	15089538	29128693
CM039220.1	chr-13	+	53447792	779295	52960245	55696070	108469	55648616
JAGKSS010000038.1	None	+	25409	na	na	na	na	na
JAGKSS010000049.1	None	+	22450	na	na	na	na	na
JAGKSS010000053.1	None	+	20404	na	na	na	na	na
CM039224.1	chr-14	+	42497472	13130	42452363	43518121	150396	43487906
JAGKSS010000035.1	chr-14	-	28676	19564	21184	43518121	33232286	33233802
JAGKSS010000027.1	chr-14	+	40676	35325	37127	43518121	28873443	40753886
JAGKSS010000018.1	chr-15	+	48026	72	48009	55854198	9918835	9966532
JAGKSS010000054.1	chr-15	+	45700	301	28855	55854198	15062251	15761016
CM039212.1	chr-15	+	55455600	12713	55423308	55854198	281238	55818742

## Sheet: AEP to Oligactis
Query	Target	Strand	Q-len	Q-start	Q-stop	T-len	T-start	T-stop
contig_1050	chr-1	-	153335	136398	142367	81026817	1499026	1503615
contig_23335	chr-1	-	86274	76657	82624	81026817	1499026	1503615
contig_3014	chr-1	-	34731	19299	25310	81026817	1499026	1503615
contig_3437	chr-1	-	371617	296051	301989	81026817	1499026	1503615
contig_705	chr-1	+	52559	22179	28148	81026817	1499026	1503615
contig_787	chr-1	-	359349	351625	357169	81026817	1499026	1503615
contig_8802	chr-1	+	135635	65182	71159	81026817	1499026	1503615
contig_1044	chr-1	+	46855	11834	17798	81026817	1499026	1503615
contig_2682	chr-1	-	12648	1940	7910	81026817	1499026	1503615
contig_4233	chr-1	+	47887	43648	46103	81026817	1775075	1777250
contig_13641	chr-1	+	23280	404	2653	81026817	1837225	1839644
contig_13534	chr-1	+	5265	2058	4330	81026817	1837225	1839644
contig_19299	chr-1	+	2940	326	2588	81026817	1837225	1839644
contig_1391	chr-1	+	137041	115880	118095	81026817	1837409	1839644
contig_16069	chr-1	-	9779	6953	9646	81026817	1837197	1839945
contig_6902	chr-1	-	24706	8024	9252	81026817	1920529	1921732
contig_4944	chr-1	-	45883	39888	41412	81026817	1945267	2082453
contig_20131	chr-1	+	10041	8491	9929	81026817	2497316	2498430
contig_12570	chr-1	-	24638	9808	10978	81026817	2497316	2498440
contig_21021	chr-1	+	13683	1236	1935	81026817	2497554	2498250
contig_12207	chr-1	+	7131	5838	7099	81026817	2497316	2498548
contig_17347	chr-1	-	20904	12393	13702	81026817	2497316	2498548
contig_5538	chr-1	-	30957	6838	8226	81026817	2497316	2498548
contig_18428	chr-1	+	22397	316	1633	81026817	2497316	2498553
contig_24021	chr-1	-	89715	20851	21903	81026817	2497316	2498553
contig_9705	chr-1	+	14142	1918	3030	81026817	2497316	2498553
contig_5537	chr-1	-	16266	2319	3585	81026817	2497375	2498548
contig_6434	chr-1	+	51968	16931	18144	81026817	2497375	2498553
contig_5231	chr-1	-	13255	403	1591	81026817	2497384	2498548
contig_16497	chr-1	+	25149	12080	13218	81026817	2497410	2498548
contig_20640	chr-1	-	11398	3882	5112	81026817	2497410	2498548
contig_20641	chr-1	-	11511	2509	3734	81026817	2497410	2498548
contig_14972	chr-1	-	13792	2585	13284	81026817	2497375	2498553
contig_16411	chr-1	+	18848	9306	10203	81026817	2497673	2498553
contig_2302	chr-1	-	59292	41639	42459	81026817	2497755	2498548
contig_21880	chr-1	-	7812	4047	7629	81026817	1140566	4051607
contig_4101	chr-1	+	20257	11387	17736	81026817	2869559	2875833
contig_1867	chr-1	+	382926	79308	86055	81026817	3007303	3014706
contig_3335	chr-1	+	614525	492463	505536	81026817	3007236	3021088
contig_1755	chr-1	-	223120	4657	186675	81026817	1499026	35958772
contig_9927	chr-1	-	55796	190	11348	81026817	3524946	3536524
contig_1494	chr-1	-	269681	86934	231030	81026817	3007236	13032846
contig_4625	chr-1	+	194217	116120	164874	81026817	3007236	75102055
contig_10525	chr-1	-	14791	9720	12495	81026817	4142525	4145137
contig_5799	chr-1	-	5669	54	2882	81026817	4142525	4145137
contig_6630	chr-1	-	16450	5488	8709	81026817	4142525	4145433
contig_16782	chr-1	-	15218	10978	13171	81026817	4143081	4145137
contig_24379	chr-1	-	28100	1297	3048	81026817	4404752	4406323
contig_21620	chr-1	-	3544	210	1747	81026817	1920523	7008467
contig_14438	chr-1	-	14217	1005	2537	81026817	1920523	7008467
contig_1843	chr-1	-	43209	10058	37113	81026817	1499026	69052679
contig_14020	chr-1	-	22179	3	1243	81026817	1920523	7007534
contig_1588	chr-1	-	194957	175917	194955	81026817	1499026	66253939
contig_1775	chr-1	-	461524	240481	245255	81026817	4608063	4612859
contig_16152	chr-1	+	7413	4770	6968	81026817	4674735	4677122
contig_2261	chr-1	-	308490	179738	246068	81026817	3524946	9283742
contig_2645	chr-1	+	291153	86432	155376	81026817	1499026	16569928
contig_14037	chr-1	+	125719	3812	28249	81026817	1499026	31030471
contig_8453	chr-1	-	31484	5002	31186	81026817	2497313	20421754
contig_8452	chr-1	-	34137	5446	31677	81026817	2497313	20421768
contig_16491	chr-1	+	49053	23389	24655	81026817	5870030	5871660
contig_1681	chr-1	-	332405	187	269463	81026817	1352543	50413124
contig_13591	chr-1	-	36257	17871	20068	81026817	4179139	8160098
contig_2529	chr-1	+	74637	24745	73615	81026817	4404512	26439850
contig_4224	chr-1	+	227755	181625	217017	81026817	3007644	59254423
contig_1606	chr-1	+	387982	162166	369097	81026817	3010449	58549975
contig_8597	chr-1	+	40309	23477	24193	81026817	7006565	7007276
contig_9436	chr-1	-	23406	5201	6336	81026817	7006610	7008467
contig_14808	chr-1	+	88917	48864	52468	81026817	3526159	10891239
contig_1944	chr-1	-	409171	53777	281124	81026817	1499026	39075332
contig_1982	chr-1	+	73893	2700	73598	81026817	1499026	32622291
contig_6537	chr-1	+	106544	21253	42567	81026817	2033473	10709053
contig_1908	chr-1	-	262800	72194	146920	81026817	1499026	59055863
contig_1154	chr-1	-	418643	160292	237619	81026817	1499026	14049221
contig_4094	chr-1	+	297658	39888	179310	81026817	2033545	45847293
contig_4839	chr-1	+	42686	1429	6802	81026817	1920523	30825233
contig_1921	chr-1	+	45433	8860	27856	81026817	1499026	61669622
contig_1731	chr-1	-	299077	234691	243189	81026817	8884823	8893215
contig_22403	chr-1	+	14173	2979	5829	81026817	9158410	9161278
contig_22404	chr-1	+	18427	12000	14800	81026817	9158410	9161278
contig_21941	chr-1	-	17915	3218	5801	81026817	9181282	9183869
contig_5694	chr-1	+	191719	51294	58661	81026817	1920523	54153210
contig_6536	chr-1	-	100679	3198	55873	81026817	2033473	74864975
contig_17176	chr-1	+	52160	6938	45170	81026817	2497316	52494894
contig_4071	chr-1	+	157541	20225	25962	81026817	10615506	10622244
contig_4056	chr-1	+	175872	19616	30196	81026817	10703047	10713572
contig_2332	chr-1	-	4173	718	2799	81026817	10836257	10838332
contig_11896	chr-1	+	104097	24	15059	81026817	10615506	16054719
contig_2867	chr-1	+	87130	4002	48163	81026817	1499026	48113372
contig_9238	chr-1	-	359570	80902	336352	81026817	3767172	69008741
contig_22178	chr-1	+	8859	11	8844	81026817	8884823	16055583
contig_23543	chr-1	+	159328	63756	71306	81026817	11688206	11695892
contig_7366	chr-1	-	114373	87174	91556	81026817	11733526	11739590
contig_4060	chr-1	+	85005	56845	58995	81026817	1920523	54153210
contig_15821	chr-1	+	9621	317	3887	81026817	11959799	11963309
contig_23537	chr-1	+	106083	76468	78572	81026817	7614306	16055583
contig_22586	chr-1	+	4902	161	2448	81026817	12229761	12232017
contig_20980	chr-1	+	2908	526	2903	81026817	12229761	12232201
contig_23394	chr-1	+	248295	35667	247486	81026817	375640	24067174
contig_8232	chr-1	-	17679	7410	9328	81026817	6012409	23675296
contig_2890	chr-1	+	662269	391247	405539	81026817	375640	24067174
contig_280	chr-1	+	303690	288184	301514	81026817	375640	24067174
contig_3442	chr-1	-	91336	51715	56927	81026817	13048277	13053876
contig_19446	chr-1	+	9605	199	3723	81026817	13051356	13054588
contig_23529	chr-1	-	90295	13503	67136	81026817	2497375	35304010
contig_2295	chr-1	-	45435	1921	5715	81026817	2497316	16991187
contig_3513	chr-1	+	280080	3279	185631	81026817	375640	68798981
contig_2910	chr-1	-	58026	8262	11614	81026817	1920667	54153210
contig_19481	chr-1	-	43364	18339	20614	81026817	7614306	16991187
contig_3173	chr-1	+	171858	3	5257	81026817	13708497	13713660
contig_16741	chr-1	+	9843	6195	9843	81026817	12793405	15587917
contig_16196	chr-1	-	7252	869	4435	81026817	12793405	15587917
contig_9934	chr-1	-	92962	23467	26801	81026817	12793676	15587917
contig_14904	chr-1	-	18959	14111	17451	81026817	12793676	15587917
contig_19766	chr-1	-	17520	101	3632	81026817	1920523	54153210
contig_694	chr-1	-	716922	211149	221105	81026817	13048277	45635669
contig_5387	chr-1	-	21313	9911	11908	81026817	12793676	15587917
contig_24391	chr-1	-	43173	27936	30467	81026817	6011872	23675703
contig_2328	chr-1	-	82315	324	53806	81026817	13048277	68711521
contig_1725	chr-1	+	147954	56860	65532	81026817	7347618	27179305
contig_571	chr-1	-	46651	343	10979	81026817	13048277	37340557
contig_19130	chr-1	-	17272	14486	16859	81026817	6011933	23675703
contig_9141	chr-1	+	21680	7085	20260	81026817	12030023	34836418
contig_9128	chr-1	+	136650	69384	82496	81026817	12030023	34836418
contig_16800	chr-1	-	26603	6458	9404	81026817	3493532	27014223
contig_13242	chr-1	-	13735	10885	13420	81026817	15591183	15782983
contig_20188	chr-1	+	120600	72038	87528	81026817	8158308	16900427
contig_24537	chr-1	+	102576	96175	98216	81026817	1920523	54153210
contig_19840	chr-1	-	59539	3958	6109	81026817	16052712	16054719
contig_14630	chr-1	-	33720	8947	32556	81026817	4142525	67284716
contig_20722	chr-1	+	15150	336	2116	81026817	16377888	16379608
contig_2672	chr-1	+	7912	332	2123	81026817	16377888	16379608
contig_3409	chr-1	+	10390	327	2107	81026817	16377888	16379608
contig_6524	chr-1	+	4426	2353	3404	81026817	16463142	16464202
contig_9656	chr-1	-	5570	3496	4924	81026817	16463142	16464598
contig_1756	chr-1	+	36363	5733	35066	81026817	1837197	22567280
contig_12133	chr-1	+	7882	4	2899	81026817	16496764	16499772
contig_10684	chr-1	-	13181	6655	9383	81026817	16497078	16499772
contig_22331	chr-1	+	11341	5268	7706	81026817	16497248	16499779
contig_4512	chr-1	-	125357	29348	125349	81026817	9282015	48796968
contig_18460	chr-1	-	93330	18023	20999	81026817	16052703	16991187
contig_15730	chr-1	-	4978	2015	4960	81026817	16052712	16991187
contig_4773	chr-1	-	9698	6727	9649	81026817	16052738	16991187
contig_10199	chr-1	-	7827	16	2927	81026817	16052712	16991187
contig_21155	chr-1	-	101616	62124	65032	81026817	16052712	16991187
contig_10915	chr-1	-	15718	10296	13202	81026817	16052712	16991187
contig_4684	chr-1	-	16336	6048	8954	81026817	16052712	16991187
contig_637	chr-1	-	4397	1442	4337	81026817	16052712	16991187
contig_12376	chr-1	-	16518	12208	15080	81026817	16052738	16991187
contig_3362	chr-1	+	137866	134822	136431	81026817	1920523	54153210
contig_3169	chr-1	+	39572	23559	39174	81026817	13048277	48051168
contig_21511	chr-1	-	9251	5602	8007	81026817	16856379	16858442
contig_17296	chr-1	+	17547	3760	6811	81026817	16896574	16899456
contig_10584	chr-1	+	15866	12099	15865	81026817	16896603	16900188
contig_6819	chr-1	+	8939	62	3958	81026817	16896550	16900392
contig_21031	chr-1	-	24609	12507	15198	81026817	16896867	16900096
contig_17885	chr-1	-	36274	32209	36212	81026817	16896574	16900402
contig_3672	chr-1	+	36618	29028	33054	81026817	16896593	16900402
contig_2795	chr-1	+	138782	5042	131113	81026817	1499026	47405930
contig_7355	chr-1	+	529552	206265	268442	81026817	375640	67800670
contig_2545	chr-1	+	745890	346397	742459	81026817	1499026	46413424
contig_20834	chr-1	-	11284	6881	8552	81026817	9077697	26316987
contig_18165	chr-1	+	27461	1727	6388	81026817	17734902	17739520
contig_2114	chr-1	-	11495	3518	6724	81026817	17736127	17739659
contig_3123	chr-1	+	17792	42	3123	81026817	17736288	17739659
contig_9423	chr-1	+	27908	19499	20366	81026817	17747008	17747854
contig_2885	chr-1	-	98904	27181	50482	81026817	9158410	23604307
contig_16852	chr-1	-	91936	67582	90976	81026817	11227533	23604307
contig_12197	chr-1	-	21129	37	17439	81026817	8188476	32136963
contig_4134	chr-1	-	349487	23931	256020	81026817	2497316	68622467
contig_1993	chr-1	-	119431	9857	60189	81026817	1499026	52782820
contig_24680	chr-1	+	170239	23867	151636	81026817	1920523	47590579
contig_16496	chr-1	+	236243	42729	225357	81026817	2292502	56847366
contig_17294	chr-1	+	15419	1847	3223	81026817	1920667	54153210
contig_3973	chr-1	+	124153	118711	121179	81026817	19225630	19228130
contig_23241	chr-1	-	3991	42	2850	81026817	13708531	30826800
contig_6586	chr-1	-	46593	6897	32846	81026817	16896574	35333000
contig_18106	chr-1	-	6840	2	2804	81026817	13708497	30827000
scaffold_1680	chr-1	+	1350413	510057	1216005	81026817	2967929	67800670
contig_4600	chr-1	+	35640	17841	20202	81026817	4256924	33698739
contig_947	chr-1	-	234336	149250	182090	81026817	7347618	69971164
contig_21239	chr-1	-	202149	9	5078	81026817	13708517	30826800
contig_17383	chr-1	+	6074	26	2179	81026817	5868627	37341805
contig_6296	chr-1	-	46551	11166	15710	81026817	13708497	30827000
contig_1591	chr-1	+	50725	36812	50702	81026817	1499026	36498055
contig_2474	chr-1	+	86663	4	5102	81026817	13708532	30827000
contig_320	chr-1	-	598929	82035	464139	81026817	375640	68436217
contig_23795	chr-1	-	143865	80356	87196	81026817	13708497	30827000
contig_8413	chr-1	-	154562	98034	101251	81026817	14045747	33506952
contig_17384	chr-1	-	2363	503	2357	81026817	5868627	37341805
contig_15339	chr-1	+	311763	217195	297902	81026817	13048277	48051168
contig_15171	chr-1	+	7870	2637	5130	81026817	6441248	50466991
contig_18054	chr-1	+	20999	36	7528	81026817	13692115	29338093
contig_22446	chr-1	-	11030	4445	8125	81026817	13710063	30826150
contig_22447	chr-1	-	17793	14107	17718	81026817	13709514	30826702
contig_16332	chr-1	-	14936	10768	13899	81026817	22356996	22360202
contig_24309	chr-1	-	273301	8766	230911	81026817	13708497	48793885
contig_18777	chr-1	+	66734	31976	38701	81026817	2846369	54594434
contig_2008	chr-1	-	37556	18897	24388	81026817	5868092	37342594
contig_3919	chr-1	+	48741	1754	44184	81026817	13708497	76736638
contig_1897	chr-1	-	264378	43701	106014	81026817	1499026	67800670
contig_12782	chr-1	+	42376	25945	29356	81026817	6441313	50466991
contig_3087	chr-1	+	169905	60266	165669	81026817	7284005	67294131
scaffold_2984	chr-1	+	1606926	176295	1412593	81026817	888240	58550035
contig_8830	chr-1	+	66586	27491	37083	81026817	23005172	23013488
contig_10562	chr-1	-	5371	20	3480	81026817	11797896	33210749
contig_2666	chr-1	+	91785	52838	88738	81026817	13708497	42585200
contig_5006	chr-1	-	33087	30777	32935	81026817	5867869	37342579
contig_20370	chr-1	+	5373	40	3075	81026817	23070720	24103692
contig_12323	chr-1	+	18153	2912	5904	81026817	23600926	23603749
contig_13837	chr-1	+	10867	3637	6630	81026817	23600926	23603749
contig_18494	chr-1	-	4813	42	3161	81026817	23600939	23603749
contig_22686	chr-1	+	4121	33	3614	81026817	23600926	23604295
contig_15809	chr-1	+	4947	1197	4777	81026817	23600926	23604307
contig_2004	chr-1	-	185222	110385	117310	81026817	23701791	23708535
contig_22976	chr-1	+	18906	7544	9957	81026817	23760813	23763205
contig_10150	chr-1	-	72790	503	65656	81026817	16896593	67800670
contig_1057	chr-1	+	280085	118493	270760	81026817	2497375	31026951
contig_3496	chr-1	+	184734	20257	41292	81026817	4608063	79504614
contig_3002	chr-1	+	80711	36432	40532	81026817	13708497	31027609
contig_2462	chr-1	-	43024	4923	26420	81026817	13048277	47405930
contig_13419	chr-1	+	9643	1545	5629	81026817	13708497	31027609
contig_5088	chr-1	-	84190	34569	42505	81026817	20429314	31231268
contig_1309	chr-1	+	50045	3991	9287	81026817	13708497	31027609
contig_10387	chr-1	-	242418	324	196057	81026817	16377888	31230501
contig_22887	chr-1	+	470142	56099	418886	81026817	2292344	51104500
contig_22036	chr-1	-	301814	94661	186558	81026817	2497325	31231273
contig_23233	chr-1	+	64890	34728	56844	81026817	23612781	38357749
scaffold_4993	chr-1	+	65155	20535	26856	81026817	20429309	31231273
contig_2883	chr-1	+	115404	29608	108329	81026817	16377888	31231268
contig_972	chr-1	-	195749	504	118597	81026817	13048277	67309613
contig_3360	chr-1	-	389376	70849	357672	81026817	6011872	48051408
contig_16689	chr-1	-	10347	1849	3231	81026817	1920667	54153210
contig_740	chr-1	-	524251	230727	311183	81026817	1309937	71060693
contig_886	chr-1	+	126990	34109	39898	81026817	20430000	31230583
contig_24446	chr-1	-	13795	8851	11121	81026817	25331019	25333600
contig_3106	chr-1	+	703697	390045	395780	81026817	20429309	31231273
contig_891	chr-1	-	119786	3	6581	81026817	20429309	31231273
contig_3912	chr-1	+	106437	95720	101945	81026817	20429309	31231273
contig_3913	chr-1	+	142221	124782	131055	81026817	20429309	31231273
contig_3920	chr-1	+	41252	32762	38963	81026817	20429377	31231205
contig_20904	chr-1	+	81521	7	6234	81026817	20429335	31231247
contig_3444	chr-1	+	312907	190413	197003	81026817	20429309	31231273
contig_16982	chr-1	-	100064	4	3168	81026817	20429327	31231255
contig_14405	chr-1	-	59667	76	3691	81026817	6441313	50466991
contig_3921	chr-1	+	106913	12886	20667	81026817	20429309	31231273
contig_23442	chr-1	+	89360	15238	25270	81026817	20429335	31231247
contig_16299	chr-1	-	237564	46360	207763	81026817	23005172	48581685
contig_5940	chr-1	+	678384	45486	395944	81026817	1499026	68436217
contig_754	chr-1	-	512033	264058	437248	81026817	20412170	59254721
contig_12499	chr-1	-	5895	1686	2906	81026817	26438918	26439850
scaffold_21998	chr-1	+	509407	42	491839	81026817	20457564	59813350
contig_5230	chr-1	+	565572	25344	534842	81026817	2497316	28961842
contig_5263	chr-1	+	321138	56636	308676	81026817	26744812	27160319
contig_1631	chr-1	-	337121	80418	292763	81026817	3007236	75569050
contig_11148	chr-1	+	215514	11	156023	81026817	13708517	53637654
contig_881	chr-1	-	459564	158017	410083	81026817	20429309	49557313
contig_24453	chr-1	+	35887	18447	22111	81026817	20926941	33847712
contig_1270	chr-1	+	190814	4815	44090	81026817	20457564	58984172
contig_14745	chr-1	+	12178	946	3519	81026817	20926716	33846666
contig_6816	chr-1	+	343815	244744	283673	81026817	20914313	44563780
contig_2226	chr-1	+	203701	25603	29152	81026817	6678984	45863176
contig_2104	chr-1	-	299874	134928	275266	81026817	7347618	75305783
contig_24062	chr-1	-	127849	1	109662	81026817	13708517	64214844
contig_16958	chr-1	+	18399	14273	17867	81026817	11799340	33210899
contig_22413	chr-1	-	7417	2538	3449	81026817	4179139	73643386
contig_14559	chr-1	-	12560	538	2750	81026817	6442494	50466606
contig_7162	chr-1	-	314702	141977	221060	81026817	2497325	36498182
contig_3918	chr-1	-	66120	2116	50533	81026817	20429309	76736638
contig_11187	chr-1	+	9253	5734	8780	81026817	28648988	28651791
contig_22585	chr-1	-	11873	1176	4233	81026817	28648988	28651791
contig_2424	chr-1	+	39536	16272	19333	81026817	28648988	28651791
contig_13108	chr-1	+	18662	34	2751	81026817	28649326	28651791
contig_9612	chr-1	-	86460	73059	75231	81026817	28649881	28651791
contig_5211	chr-1	-	42488	4632	8053	81026817	29220439	29224374
contig_8894	chr-1	-	15614	841	3912	81026817	8103934	42722578
contig_6624	chr-1	-	27896	20953	23705	81026817	25925337	32622529
contig_17065	chr-1	-	37397	5007	7743	81026817	27773229	31030916
contig_17209	chr-1	+	25094	19928	22824	81026817	25925337	32622529
contig_19656	chr-1	-	6956	39	2934	81026817	25925337	32622529
contig_5213	chr-1	-	95445	38501	44739	81026817	29187194	29765929
contig_2091	chr-1	+	150004	10224	133565	81026817	1499026	67800638
contig_16326	chr-1	-	240173	117338	187930	81026817	6496314	68622515
contig_3449	chr-1	-	70549	66858	70038	81026817	20927118	33847659
contig_22201	chr-1	-	370658	137094	263129	81026817	16896574	49775539
contig_4734	chr-1	-	290196	11521	267084	81026817	4179151	67800670
contig_5167	chr-1	-	482815	5509	451010	81026817	7006463	62661535
contig_15156	chr-1	-	11755	10919	11755	81026817	21790109	38730476
contig_2070	chr-1	-	247091	34710	219435	81026817	2497316	58456285
contig_892	chr-1	+	160215	52383	83191	81026817	20429309	57102874
contig_1176	chr-1	-	120841	58813	63028	81026817	30813325	30817794
contig_2615	chr-1	-	96961	11918	71579	81026817	4394033	38785340
contig_14746	chr-1	-	11629	8133	11339	81026817	28423535	33847713
contig_4346	chr-1	+	147889	59698	95058	81026817	10556071	54495895
contig_2164	chr-1	+	730937	20352	700373	81026817	13048277	67800670
contig_1177	chr-1	+	49025	9879	24822	81026817	16377888	34854620
contig_23522	chr-1	-	62456	36868	62419	81026817	7006265	33812894
contig_2778	chr-1	+	605331	61070	543967	81026817	2497381	68284193
contig_9063	chr-1	+	78802	38468	52450	81026817	16053000	58380010
contig_19536	chr-1	+	7843	129	2743	81026817	20914313	44563725
contig_16356	chr-1	+	171211	28862	43977	81026817	2292736	72443597
contig_9488	chr-1	-	7589	2506	4764	81026817	20914313	44563780
contig_16171	chr-1	+	224767	158402	191053	81026817	26984418	40975343
contig_19478	chr-1	-	16824	6014	8676	81026817	20914313	44563781
contig_7321	chr-1	-	43268	26707	29685	81026817	26765362	37342594
contig_8627	chr-1	+	6398	3970	6397	81026817	20914367	44563775
contig_21971	chr-1	+	15132	4187	7825	81026817	11226597	60969616
contig_5174	chr-1	+	10728	8017	8917	81026817	30399626	34351851
contig_2443	chr-1	-	379234	32752	294624	81026817	2497375	53750822
contig_7354	chr-1	+	339698	105	245792	81026817	24063763	37983385
contig_12269	chr-1	+	19388	14912	19383	81026817	32791561	32794153
contig_20868	chr-1	-	61463	39972	42871	81026817	32791561	32794516
contig_12952	chr-1	+	39587	20	11797	81026817	32791813	32809116
contig_21028	chr-1	+	258213	64966	199726	81026817	13692110	76079080
contig_4904	chr-1	+	31569	4311	20087	81026817	16566977	57102874
contig_11908	chr-1	+	573405	209896	356371	81026817	7006265	53883342
contig_2806	chr-1	+	22091	1951	6226	81026817	32985865	32989937
contig_11604	chr-1	-	68435	30734	33144	81026817	30815589	34852971
contig_2430	chr-1	-	106115	49008	53150	81026817	23600939	54495895
contig_17364	chr-1	-	124911	5083	118029	81026817	23600926	36498279
contig_18584	chr-1	+	13796	2846	4896	81026817	33156022	33158244
contig_18583	chr-1	+	10614	2499	4037	81026817	33156488	33158157
contig_18481	chr-1	-	21262	11991	15415	81026817	33207317	33211069
contig_7517	chr-1	+	10439	782	4578	81026817	33207317	33211069
contig_12523	chr-1	-	168604	49711	145305	81026817	32619625	34003882
contig_1110	chr-1	+	229766	34	187350	81026817	2886036	78754090
contig_5703	chr-1	-	24258	129	3790	81026817	26984418	40975343
contig_3674	chr-1	-	14512	69	3733	81026817	26984418	40975343
contig_5734	chr-1	+	7336	1218	4883	81026817	26984418	40975343
contig_3417	chr-1	-	62123	41513	45179	81026817	26984418	40975343
contig_2608	chr-1	+	28465	7371	11057	81026817	26984418	40975343
contig_5871	chr-1	+	10797	2420	6081	81026817	26984418	40975343
contig_1005	chr-1	+	44446	975	30570	81026817	13708881	68418298
contig_2941	chr-1	+	27145	18	5901	81026817	33805863	33812886
contig_2640	chr-1	+	257687	73407	79255	81026817	33805867	33812894
contig_22763	chr-1	+	221936	15148	190886	81026817	9158578	57102866
contig_7024	chr-1	+	65764	19179	22487	81026817	33844541	33847712
contig_474	chr-1	-	235746	30289	174819	81026817	20429288	78315451
contig_7401	chr-1	-	47798	38154	39493	81026817	32310179	35639139
contig_11463	chr-1	+	44925	26527	30193	81026817	26984383	40975343
contig_300	chr-1	-	513133	325437	444180	81026817	33844550	37691530
contig_15628	chr-1	+	20377	11656	13374	81026817	32310179	35639164
contig_3279	chr-1	-	26757	12193	13099	81026817	34187723	34188632
contig_3915	chr-1	+	268378	58444	163830	81026817	6497203	57801556
contig_6292	chr-1	+	161155	143633	150156	81026817	10502837	59115410
contig_7773	chr-1	-	350804	68023	108278	81026817	24587178	57077480
contig_9536	chr-1	-	16120	4993	10661	81026817	2497375	54495895
contig_11899	chr-1	+	339958	34753	161112	81026817	13029415	70922776
contig_4675	chr-1	+	250672	75961	172120	81026817	34684329	34782038
contig_397	chr-1	-	200738	146142	149738	81026817	23600926	54495795
contig_6681	chr-1	+	17727	4295	7708	81026817	23600926	54495795
contig_17841	chr-1	-	18120	14460	18073	81026817	23600939	54495795
contig_17151	chr-1	-	377614	43766	311288	81026817	25156677	68676254
contig_12618	chr-1	-	6449	4803	5711	81026817	25546713	44171535
contig_12882	chr-1	+	18987	11632	15114	81026817	23601121	54495793
contig_12865	chr-1	-	100540	91665	93540	81026817	34002482	36140220
contig_1075	chr-1	-	338378	62847	270611	81026817	33207317	46359786
contig_9825	chr-1	+	206880	55264	58832	81026817	23600926	54495895
contig_8885	chr-1	-	21743	9	21113	81026817	35217618	35319415
contig_18398	chr-1	+	17456	3388	6978	81026817	23600926	54495895
contig_5704	chr-1	-	437362	141307	211063	81026817	26984418	48051415
contig_16224	chr-1	-	7480	3930	7457	81026817	23600939	54495895
contig_21112	chr-1	+	9986	6377	9942	81026817	23600938	54495895
contig_12331	chr-1	+	14094	5003	8558	81026817	23600939	54495895
contig_818	chr-1	+	690895	188750	448088	81026817	20430078	48796977
contig_22897	chr-1	-	5774	2067	5628	81026817	23600939	54495895
contig_18734	chr-1	-	65443	14391	48826	81026817	1920523	60375419
contig_7957	chr-1	+	93200	1996	79932	81026817	32985865	48882836
contig_22397	chr-1	-	36562	16424	17668	81026817	35957458	35958753
contig_2630	chr-1	-	44073	40417	42306	81026817	11226597	60968362
contig_4358	chr-1	+	154590	15509	115130	81026817	13709514	69971164
contig_23438	chr-1	-	140126	69025	82153	81026817	5868585	49556786
contig_24314	chr-1	+	18747	5004	8485	81026817	23601119	54495895
contig_6936	chr-1	-	118056	57068	98330	81026817	16896574	58461668
contig_15582	chr-1	-	105014	22	6153	81026817	36492295	36498279
contig_14317	chr-1	-	203096	17977	45524	81026817	36492263	37515894
contig_19129	chr-1	+	321013	217514	286795	81026817	2497316	70922864
contig_14545	chr-1	+	326922	25022	176613	81026817	22417422	37763354
contig_21459	chr-1	-	13797	2198	4660	81026817	20914367	50021602
contig_2503	chr-1	-	75132	49853	52542	81026817	11226642	60969137
contig_15504	chr-1	-	266641	183101	237651	81026817	35782104	78754090
contig_22822	chr-1	+	24334	10196	11816	81026817	37279382	37281044
contig_8593	chr-1	-	38460	7257	10780	81026817	23601318	54495895
contig_1972	chr-1	+	21829	3985	5743	81026817	25546153	44172807
contig_9160	chr-1	+	230242	23587	211167	81026817	8099814	64028348
contig_3590	chr-1	+	115655	3525	31092	81026817	20432493	63679717
contig_4678	chr-1	+	65209	51143	65158	81026817	16896574	61204579
contig_3244	chr-1	-	40463	26316	28155	81026817	14218851	75237887
contig_8125	chr-1	+	58916	29412	58239	81026817	13692234	67800670
contig_14755	chr-1	-	27435	16071	17970	81026817	25546153	44172980
contig_2709	chr-1	+	380529	508	304706	81026817	36493506	42584979
contig_6653	chr-1	-	331709	9351	129124	81026817	16566833	75305729
contig_14644	chr-1	+	186820	78337	160643	81026817	38260007	38331554
contig_15154	chr-1	-	4674	40	2864	81026817	38355080	38357749
contig_1543	chr-1	+	38050	1553	4381	81026817	38355080	38357749
contig_11540	chr-1	+	36124	29047	31536	81026817	38355080	38357752
contig_3701	chr-1	+	37248	126	2893	81026817	38355165	38357745
contig_11731	chr-1	-	9346	6554	9304	81026817	38355165	38357749
contig_18605	chr-1	-	20813	209	2129	81026817	38358897	38360845
contig_14359	chr-1	+	2787	45	2749	81026817	20914313	50021516
contig_8156	chr-1	+	12564	8060	10806	81026817	20914313	50021602
contig_13866	chr-1	+	9228	53	2804	81026817	20914313	50021602
contig_6127	chr-1	+	110264	40847	43198	81026817	20914313	50021602
contig_1752	chr-1	+	123339	21699	107548	81026817	30816338	59254721
contig_7636	chr-1	+	7014	648	2205	81026817	35957444	40911519
contig_8516	chr-1	+	33943	7286	28107	81026817	36492295	71544936
contig_1580	chr-1	+	438042	9031	431485	81026817	1833493	40514917
contig_7337	chr-1	-	8929	1788	3569	81026817	35957444	40911744
contig_2617	chr-1	+	154523	38392	100371	81026817	38411165	48404736
contig_1776	chr-1	+	201646	78905	185134	81026817	14732398	64375008
contig_2412	chr-1	-	276275	38059	149541	81026817	16257845	75101944
contig_6143	chr-1	-	13693	3013	10070	81026817	39325215	39332316
contig_5201	chr-1	-	9855	43	4482	81026817	39326950	39331356
contig_6141	chr-1	-	136524	81395	87324	81026817	39326254	39332328
contig_6150	chr-1	+	81049	7	4915	81026817	39326911	39331934
contig_13076	chr-1	-	134302	65935	130374	81026817	38875827	52489915
contig_16526	chr-1	+	20961	8809	11571	81026817	20914464	50021602
contig_3263	chr-1	-	24729	952	10702	81026817	28649699	58461668
contig_14973	chr-1	-	7980	3144	7936	81026817	2497522	70922904
contig_5813	chr-1	-	10437	39	1265	81026817	14733285	64373918
contig_16959	chr-1	-	5377	1012	5345	81026817	14732299	64375020
contig_11982	chr-1	-	34349	6520	10385	81026817	14732294	64375025
contig_17958	chr-1	-	24808	2631	6438	81026817	14732299	64375020
contig_24575	chr-1	-	53874	20370	24159	81026817	14732294	64375025
contig_15428	chr-1	-	19109	8894	12405	81026817	14732294	64375025
contig_18365	chr-1	-	38533	31736	35526	81026817	14732294	64375034
contig_8006	chr-1	-	22379	9680	12572	81026817	40024780	40027047
contig_8005	chr-1	-	18288	7705	11249	81026817	40024780	40027358
contig_8003	chr-1	-	20178	210	2370	81026817	40058131	40060310
contig_8004	chr-1	-	23775	2066	18582	81026817	40058131	40063864
contig_9783	chr-1	-	384844	216000	338068	81026817	13029392	70922904
contig_488	chr-1	+	1128779	195857	1005340	81026817	4142525	75305783
contig_21697	chr-1	-	9890	8450	9883	81026817	40536321	40537759
contig_3327	chr-1	+	159556	80483	127872	81026817	1499026	58603252
contig_11025	chr-1	+	20354	9757	13791	81026817	24325250	57077445
contig_4450	chr-1	-	116307	18627	90902	81026817	4257059	70083699
contig_1924	chr-1	+	170319	53311	146952	81026817	28365654	57690450
contig_22507	chr-1	+	4117	674	4052	81026817	38358887	43856519
contig_13582	chr-1	+	21895	12622	16086	81026817	38358887	43856519
contig_2609	chr-1	+	25492	17181	20608	81026817	26361160	53637921
contig_24072	chr-1	+	11204	2411	5682	81026817	38359069	43856519
contig_10263	chr-1	+	190928	8750	156712	81026817	37981222	41632044
contig_3105	chr-1	+	19593	9844	11832	81026817	41166449	41168710
contig_2050	chr-1	-	49820	20890	22153	81026817	41127238	41240217
contig_14667	chr-1	+	87905	7667	65437	81026817	15039306	47405930
contig_23528	chr-1	-	78850	30631	34151	81026817	13029376	70922908
contig_22737	chr-1	-	47880	36308	38373	81026817	4531764	77976590
contig_14164	chr-1	-	4653	371	3594	81026817	16706202	67800517
contig_2893	chr-1	+	217589	103170	215777	81026817	15908755	64375025
contig_2105	chr-1	+	324062	29247	169845	81026817	32791587	66821483
contig_20611	chr-1	+	6942	5951	6899	81026817	16566833	75302922
contig_1937	chr-1	+	63006	32716	35531	81026817	6441290	72433710
contig_5397	chr-1	-	94507	82765	86459	81026817	16566866	75305694
contig_16182	chr-1	-	138928	92358	95473	81026817	41803860	41807114
contig_8118	chr-1	-	52025	39829	50327	81026817	28648988	60903011
contig_2994	chr-1	+	891739	20	881070	81026817	16896574	68715015
contig_14283	chr-1	+	23965	9123	14580	81026817	7710835	58577399
contig_1936	chr-1	+	45792	30332	33133	81026817	6441290	72433704
contig_12135	chr-1	+	13825	9172	12144	81026817	42330931	42334137
contig_2108	chr-1	-	233035	33895	64733	81026817	2497316	43101868
contig_249	chr-1	+	871355	56989	650201	81026817	35986999	58257650
scaffold_4281	chr-1	+	123858	14373	72970	81026817	37338599	54092648
contig_2536	chr-1	+	81547	22	33934	81026817	16497078	68436217
contig_2107	chr-1	+	87701	44596	49682	81026817	43073801	43077573
contig_3346	chr-1	+	72180	64589	69817	81026817	28430219	64214844
contig_5369	chr-1	+	40064	16280	19051	81026817	43254352	43257120
contig_12355	chr-1	+	10350	4117	6883	81026817	43254413	43257120
contig_4438	chr-1	-	52133	1282	4580	81026817	42582128	43956068
contig_21087	chr-1	+	8164	1762	4321	81026817	16257838	75102055
contig_3246	chr-1	-	416229	181926	200157	81026817	43443044	43461812
contig_13184	chr-1	-	199884	4403	180221	81026817	25546198	44755497
contig_2371	chr-1	-	268666	542	50193	81026817	20429314	49941241
contig_21601	chr-1	+	16329	5280	8283	81026817	43952945	43955946
contig_23411	chr-1	-	245314	62418	126829	81026817	44080788	44153760
contig_4680	chr-1	-	297604	27461	296498	81026817	43973942	44444053
contig_17339	chr-1	+	12497	271	5730	81026817	30822703	80470253
contig_3036	chr-1	+	775777	21262	603882	81026817	25148621	80357291
contig_14666	chr-1	+	11367	3697	5027	81026817	44435591	44436926
contig_20677	chr-1	-	26281	10708	18325	81026817	7710763	70922904
contig_19809	chr-1	-	5153	1476	2718	81026817	32643543	57643885
contig_19073	chr-1	+	22824	8396	12212	81026817	26984444	70083824
contig_2693	chr-1	+	49866	34069	49862	81026817	20432819	57103573
contig_331	chr-1	-	284825	121289	251689	81026817	26984418	55095683
contig_4436	chr-1	+	8348	1586	4759	81026817	45309752	45312808
contig_531	chr-1	-	390268	81122	389658	81026817	13029868	64087682
contig_11012	chr-1	+	128634	88355	91274	81026817	33629838	57110115
contig_17547	chr-1	-	126353	19	83781	81026817	2497375	49121705
contig_2433	chr-1	+	1243021	193254	1194137	81026817	16052712	73644856
contig_18003	chr-1	-	13227	6931	8760	81026817	16257915	75101360
contig_18445	chr-1	-	4631	2026	3735	81026817	45652319	45791695
contig_18876	chr-1	+	8888	4241	5524	81026817	45652461	45791413
contig_24183	chr-1	+	15105	13490	15069	81026817	45652461	45791695
contig_12296	chr-1	-	9299	5027	6609	81026817	45652461	45791695
contig_12072	chr-1	-	20904	19264	20773	81026817	45652461	45791695
contig_14063	chr-1	+	35510	15384	16768	81026817	45652677	45791695
contig_6754	chr-1	+	12486	1697	3092	81026817	45789949	45791394
contig_6753	chr-1	+	15375	5058	6479	81026817	45789949	45791413
contig_22239	chr-1	-	102599	58872	60058	81026817	45790166	45791413
contig_24114	chr-1	-	16870	8800	10247	81026817	45790166	45791695
contig_5357	chr-1	+	159731	61426	118047	81026817	24100855	64375020
contig_14536	chr-1	-	192318	97017	99707	81026817	16566833	75305136
contig_19794	chr-1	-	10185	5475	9204	81026817	16566833	75305694
contig_13400	chr-1	+	9947	1011	8935	81026817	42887440	53637654
contig_23064	chr-1	+	30319	24349	25041	81026817	44170591	48702703
contig_10561	chr-1	+	374200	24415	284840	81026817	28648988	49403142
contig_11060	chr-1	+	89020	49640	84987	81026817	23600926	71382433
contig_14087	chr-1	-	82738	79939	82321	81026817	22417422	72901616
contig_12864	chr-1	-	13342	392	2780	81026817	22417422	72901616
contig_12866	chr-1	-	11796	1082	3470	81026817	22417422	72901616
contig_11890	chr-1	-	8798	3116	5600	81026817	22417422	72901616
contig_17750	chr-1	+	270935	88921	190953	81026817	13029376	70922776
contig_24274	chr-1	+	22770	7450	9550	81026817	34385741	60618750
scaffold_1611	chr-1	+	1502702	20495	1493697	81026817	20431303	72434263
contig_23222	chr-1	+	216278	8722	180627	81026817	37688632	57077480
contig_5839	chr-1	+	273575	766	185561	81026817	36492798	68436217
contig_8312	chr-1	+	14204	10896	13778	81026817	47402944	47405803
contig_23470	chr-1	-	58636	46252	50293	81026817	37688676	57077480
contig_16057	chr-1	-	11613	4319	7660	81026817	13029376	70922904
contig_10686	chr-1	-	31022	26265	29292	81026817	13029376	70922908
contig_20391	chr-1	-	88352	19450	62036	81026817	43254352	58310094
contig_13353	chr-1	+	15504	5471	7543	81026817	34385949	60618743
contig_14376	chr-1	+	13383	4015	7354	81026817	39073013	61669622
contig_16322	chr-1	+	14848	6821	10120	81026817	42887440	53637654
contig_5910	chr-1	+	211066	96877	143260	81026817	2497375	60903232
contig_13264	chr-1	-	54997	16583	19907	81026817	42887440	53637654
contig_15053	chr-1	-	16594	4940	7385	81026817	42888877	53636271
contig_15054	chr-1	-	14014	5646	8497	81026817	42888877	53636271
contig_12445	chr-1	-	17078	13708	16953	81026817	42887440	53637574
contig_4903	chr-1	-	23747	4584	16706	81026817	16567534	75304593
contig_1914	chr-1	+	177924	31092	105031	81026817	2497316	58603252
contig_3343	chr-1	-	11990	3260	9975	81026817	37832487	58602362
contig_21429	chr-1	-	5377	671	1862	81026817	48313754	48314943
contig_6459	chr-1	+	113850	31288	89135	81026817	42887440	58950115
contig_24115	chr-1	+	61672	8484	30801	81026817	4608444	62312282
contig_22371	chr-1	+	106716	53826	62659	81026817	48538287	48546715
contig_933	chr-1	+	288274	193069	255950	81026817	13029376	70922908
contig_18480	chr-1	-	14492	6872	14126	81026817	23600926	79177823
contig_3466	chr-1	+	32145	17737	23985	81026817	48718753	48724546
contig_9068	chr-1	-	4325	1144	4293	81026817	48764433	48767537
contig_10839	chr-1	+	24579	15526	21292	81026817	48813566	48816852
contig_21659	chr-1	+	339328	74376	332129	81026817	48771633	49083594
contig_408	chr-1	+	2417646	264385	2390869	81026817	2497316	68396725
contig_19874	chr-1	+	116137	22810	109349	81026817	23602902	57570299
contig_12529	chr-1	+	702306	379139	451142	81026817	16566833	75305783
contig_19168	chr-1	+	23340	16916	20441	81026817	49553913	49557313
contig_19151	chr-1	+	14600	4967	8016	81026817	49553913	49557332
contig_9730	chr-1	+	526177	62364	444265	81026817	2497325	50025006
contig_13646	chr-1	+	8223	29	3622	81026817	12320720	75042739
contig_22378	chr-1	+	13398	3783	9963	81026817	20914313	67800565
contig_4877	chr-1	+	39592	28364	30875	81026817	50410442	50413105
contig_6075	chr-1	+	149748	84	113128	81026817	2497375	71290334
contig_13782	chr-1	+	85412	14393	41902	81026817	44170581	64375020
contig_16144	chr-1	+	138713	46389	85901	81026817	28365654	80609715
contig_3495	chr-1	-	9813	3915	5756	81026817	51182833	51185028
scaffold_13922	chr-1	+	250980	5839	178658	81026817	28365654	80609715
contig_11661	chr-1	+	169367	146149	157999	81026817	33207317	68715025
contig_2402	chr-1	+	270800	84058	192597	81026817	20914313	67801553
contig_17789	chr-1	-	21084	4560	19364	81026817	28365654	80609715
contig_16612	chr-1	-	32429	15615	18268	81026817	51593362	51595998
contig_4948	chr-1	+	246621	71845	135969	81026817	33207317	68622509
contig_19005	chr-1	-	60924	18473	29749	81026817	51858706	51869655
contig_12379	chr-1	+	10850	1667	4960	81026817	24082452	76757641
contig_23380	chr-1	-	159067	129612	157850	81026817	47402658	62239860
contig_2373	chr-1	+	483258	79244	260991	81026817	2497381	53905272
contig_1915	chr-1	-	114038	19838	97750	81026817	48764024	63725085
contig_19923	chr-1	+	306931	10980	125236	81026817	16052712	69008731
contig_4639	chr-1	-	35533	9922	12614	81026817	36149275	71361451
scaffold_14259	chr-1	+	217303	127605	215627	81026817	2497316	56192121
contig_19528	chr-1	-	8869	6561	8840	81026817	35987013	68676251
contig_9621	chr-1	+	15683	1925	3571	81026817	52457955	52459621
contig_9622	chr-1	+	16384	1159	2838	81026817	52457955	52459621
contig_18934	chr-1	-	321552	10196	313372	81026817	37338599	67800670
contig_8461	chr-1	+	257385	14557	228964	81026817	8157981	53590635
contig_9613	chr-1	-	352917	9088	293724	81026817	28365654	80609715
contig_8449	chr-1	+	300133	72603	299426	81026817	52318873	52980470
contig_12713	chr-1	-	31295	485	5214	81026817	37694275	73644856
contig_18515	chr-1	+	11247	7970	11245	81026817	28365654	80609715
contig_15981	chr-1	+	6690	1	3290	81026817	28365644	80609725
contig_12474	chr-1	+	41383	32606	34585	81026817	33505082	75303800
scaffold_24003	chr-1	+	33665	27017	30297	81026817	28365654	80609715
contig_11865	chr-1	+	81462	53260	56532	81026817	28365654	80609715
contig_19060	chr-1	-	12826	6232	9307	81026817	28365654	80609715
contig_11226	chr-1	-	4498	58	3288	81026817	28365654	80609715
contig_16109	chr-1	+	80562	2373	5645	81026817	28365654	80609715
contig_2446	chr-1	+	50272	8	3281	81026817	28365654	80609715
contig_12324	chr-1	+	126873	73080	76356	81026817	28365654	80609715
contig_5846	chr-1	+	46363	15502	18774	81026817	28365654	80609715
contig_3423	chr-1	+	123193	43865	78322	81026817	28365654	80609715
contig_15732	chr-1	+	270172	197	140394	81026817	7006265	65970224
contig_17617	chr-1	-	131267	36369	39607	81026817	28365654	80609715
contig_19464	chr-1	-	3868	122	3377	81026817	28365654	80609715
contig_2731	chr-1	+	15783	12515	15759	81026817	28365656	80609713
contig_4416	chr-1	+	13406	6461	8973	81026817	53880978	53883529
contig_17099	chr-1	+	22686	10933	14206	81026817	28365654	80609715
contig_14568	chr-1	+	65462	54564	57833	81026817	28365654	80609715
contig_1186	chr-1	+	216838	52672	167929	81026817	14732396	64375008
contig_70	chr-1	+	375134	8356	270019	81026817	2497375	68436217
contig_7280	chr-1	-	35026	7197	16502	81026817	54106058	54447238
contig_3351	chr-1	-	345943	117594	275971	81026817	2497316	55095205
contig_21334	chr-1	-	13069	9987	13062	81026817	33503181	75305783
contig_2093	chr-1	-	110811	55050	58326	81026817	28365654	80609715
contig_9014	chr-1	+	100855	84930	88207	81026817	28365654	80609715
contig_2185	chr-1	-	68001	52463	55742	81026817	28365654	80609715
contig_11103	chr-1	+	44351	401	3684	81026817	28365654	80609715
contig_13518	chr-1	+	37221	10507	13795	81026817	28365644	80609725
contig_6094	chr-1	-	7887	4658	7766	81026817	28365654	80609715
contig_22287	chr-1	+	16430	13044	16296	81026817	28365682	80609687
contig_6337	chr-1	-	10278	6843	10095	81026817	28365654	80609715
contig_4788	chr-1	-	75402	8609	11874	81026817	28365654	80609715
contig_7163	chr-1	+	30898	26334	29599	81026817	28365654	80609715
contig_22275	chr-1	-	5466	511	3781	81026817	28365654	80609715
contig_19104	chr-1	+	17574	0	3277	81026817	28365654	80609715
contig_8809	chr-1	+	14504	5257	8535	81026817	28365654	80609715
contig_11384	chr-1	+	15921	12284	15606	81026817	28365654	80609715
contig_19238	chr-1	-	23379	10968	14158	81026817	28365654	80609715
contig_5808	chr-1	-	291008	33118	175034	81026817	53202396	64214844
contig_10362	chr-1	-	6032	2613	5811	81026817	28365654	80609715
contig_14737	chr-1	-	4688	118	3320	81026817	28365654	80609715
contig_14891	chr-1	+	71756	142	22566	81026817	37338599	68436039
contig_14235	chr-1	+	12211	7379	9610	81026817	54559709	54561807
contig_14234	chr-1	+	690477	26580	570529	81026817	47402217	55055115
contig_10635	chr-1	+	12198	8491	12172	81026817	28365654	80609715
contig_17372	chr-1	+	9967	6693	9944	81026817	28365654	80609715
contig_22295	chr-1	+	11017	7748	10995	81026817	28365654	80609715
contig_13050	chr-1	+	62543	5049	26788	81026817	32791712	58505200
contig_13225	chr-1	-	9833	6574	9830	81026817	28365654	80609715
contig_23976	chr-1	+	6841	2171	5442	81026817	28365654	80609715
contig_22673	chr-1	-	41733	38460	41730	81026817	28365654	80609715
contig_17545	chr-1	+	11227	7958	11224	81026817	28365654	80609715
contig_9625	chr-1	-	4835	1568	4832	81026817	28365654	80609715
contig_1998	chr-1	+	488976	39907	328229	81026817	32619767	80357375
contig_9677	chr-1	+	29512	12062	15338	81026817	28365654	80609715
contig_3278	chr-1	+	341773	9611	338585	81026817	34187723	60514459
contig_14149	chr-1	+	81251	10341	58491	81026817	28365654	80609715
scaffold_7780	chr-1	+	280721	6300	257893	81026817	2497375	60506978
contig_9459	chr-1	+	29840	14921	18219	81026817	28365656	80609713
contig_14249	chr-1	+	50021	181	4638	81026817	55548458	55552901
contig_17673	chr-1	-	95679	90573	95024	81026817	55548458	55552901
contig_14248	chr-1	+	118817	113734	118139	81026817	55548527	55552901
contig_2	chr-1	-	501331	56694	430129	81026817	20914313	65057232
contig_2943	chr-1	-	154154	15855	55318	81026817	55640360	66417130
contig_9662	chr-1	-	217029	189295	195387	81026817	53634442	56071716
contig_6077	chr-1	-	64876	8097	64787	81026817	26315383	75700655
contig_14999	chr-1	+	278036	196156	232731	81026817	35957458	56047965
contig_3146	chr-1	-	158326	117619	122091	81026817	56032471	56071689
contig_3470	chr-1	+	132881	29193	61888	81026817	13638577	68396725
contig_19237	chr-1	+	96575	17646	79906	81026817	28365656	80609713
contig_2621	chr-1	+	109381	24474	30472	81026817	48880989	59935189
contig_9487	chr-1	-	11255	8882	10516	81026817	41064958	79028604
contig_1780	chr-1	+	147670	133460	137890	81026817	56742597	56746937
contig_24260	chr-1	-	76976	21051	60294	81026817	45845796	76078955
contig_1667	chr-1	+	336917	7965	252833	81026817	7006265	75700655
contig_12684	chr-1	+	56727	18025	51928	81026817	53941406	60450808
contig_23315	chr-1	+	157434	33967	107354	81026817	56995477	57112945
contig_12691	chr-1	-	70549	27802	68117	81026817	38812148	60514459
contig_23882	chr-1	+	20823	14537	15457	81026817	57060941	57061903
contig_23818	chr-1	+	39741	22863	25715	81026817	57099156	57101964
contig_1328	chr-1	-	106793	62198	65144	81026817	57099156	57102071
contig_15093	chr-1	+	45571	19064	22349	81026817	57099156	57102436
contig_1017	chr-1	-	33615	10210	14693	81026817	57099156	57103573
contig_6066	chr-1	-	14090	683	5540	81026817	40291560	75700655
contig_23754	chr-1	+	82902	76667	82899	81026817	40290392	75700610
contig_640	chr-1	-	368355	7713	170354	81026817	48118705	73202567
contig_23031	chr-1	+	20171	11529	13791	81026817	26439224	77025862
contig_16721	chr-1	+	40399	2109	25841	81026817	35957458	73896108
contig_2177	chr-1	+	200147	35836	174504	81026817	36149275	60450808
contig_5124	chr-1	+	20100	4585	5297	81026817	57642588	57643311
contig_19029	chr-1	-	142011	23959	28283	81026817	48117747	67295432
contig_17667	chr-1	-	6999	544	3568	81026817	48119453	67296631
contig_17820	chr-1	-	13972	9607	12684	81026817	57798858	57801590
contig_7844	chr-1	-	202570	75211	164928	81026817	28365654	80609715
contig_6074	chr-1	-	9347	3734	9235	81026817	40290392	75700342
contig_12320	chr-1	+	37410	9193	11591	81026817	58048302	58050224
contig_21204	chr-1	-	9514	5350	6057	81026817	58256934	58257639
contig_16343	chr-1	-	11627	9692	11269	81026817	58407012	58408517
contig_7042	chr-1	-	155234	125882	127530	81026817	58407012	58409802
contig_17878	chr-1	-	13444	6559	8605	81026817	58548018	58550035
contig_16951	chr-1	-	107220	1474	7372	81026817	58595673	58601960
contig_3268	chr-1	+	32766	680	6158	81026817	58597792	58603252
contig_10448	chr-1	+	85637	1025	2779	81026817	38834946	78270289
contig_2178	chr-1	-	51244	5814	26775	81026817	56536065	60434736
contig_19122	chr-1	+	241085	61634	167412	81026817	28365654	80609715
contig_4821	chr-1	-	154982	148534	150140	81026817	33737621	80211491
contig_5618	chr-1	+	65329	31773	34645	81026817	59100007	59102732
contig_11754	chr-1	-	10016	127	1952	81026817	33737436	80211538
contig_9611	chr-1	-	109174	41995	43818	81026817	33737436	80211538
contig_23490	chr-1	+	86929	6460	78797	81026817	25546384	64025498
contig_16932	chr-1	+	11170	3963	6559	81026817	59251608	59254721
contig_15019	chr-1	+	25943	4062	7224	81026817	59251608	59254728
contig_24174	chr-1	-	37146	10246	13155	81026817	57166302	60291142
scaffold_14163	chr-1	-	72273	20272	21435	81026817	59579790	59581023
contig_12696	chr-1	+	43447	7101	39838	81026817	53949212	60449139
contig_4357	chr-1	+	110962	21104	103300	81026817	48764024	69971164
contig_18388	chr-1	+	250063	914	236896	81026817	32987429	71060693
contig_18482	chr-1	+	13722	58	2444	81026817	48110647	76330306
contig_14161	chr-1	+	428970	9243	302916	81026817	59492580	60869943
contig_460	chr-1	-	57092	7081	11584	81026817	58866264	60514469
contig_6081	chr-1	-	8905	4833	8891	81026817	40290601	75699130
contig_3178	chr-1	+	75326	42664	46112	81026817	59931094	59935321
contig_7436	chr-1	-	19559	47	1227	81026817	59963285	59964450
contig_23383	chr-1	-	90633	13551	15828	81026817	59963244	59965784
contig_5697	chr-1	-	45840	35300	43296	81026817	56743143	72729445
contig_19223	chr-1	+	312110	599	130961	81026817	28365654	80609715
contig_16913	chr-1	+	59930	6831	56014	81026817	58873772	60501230
contig_4772	chr-1	+	8251	1408	7354	81026817	60320239	60326047
contig_5039	chr-1	-	598424	561216	580852	81026817	60437465	60501230
contig_15733	chr-1	-	16140	4196	15943	81026817	60431880	60514469
contig_1379	chr-1	+	89390	12416	26560	81026817	59963244	68436217
contig_14174	chr-1	+	9627	6537	8249	81026817	60662412	60664125
contig_14175	chr-1	+	9211	1925	3627	81026817	60662423	60664125
contig_23546	chr-1	+	55038	14230	23460	81026817	58634892	67565051
contig_11427	chr-1	+	105711	81010	86315	81026817	59963285	68434360
contig_14195	chr-1	+	77150	1204	9822	81026817	61217466	61399969
contig_3633	chr-1	+	574140	2925	402729	81026817	60431880	61767587
contig_3142	chr-1	-	35354	1105	6619	81026817	61490912	61496405
contig_10707	chr-1	+	13979	3130	5026	81026817	61667656	61669535
contig_21066	chr-1	+	128470	47651	88130	81026817	22417422	72904686
contig_15944	chr-1	-	7883	161	4360	81026817	33210175	64214844
contig_3076	chr-1	-	177173	76231	80370	81026817	59963285	68436217
contig_11539	chr-1	+	32667	21618	26668	81026817	59963338	68436039
contig_16061	chr-1	-	30936	19538	22266	81026817	48110647	76330306
contig_2153	chr-1	-	95590	32602	34896	81026817	46505771	77587115
contig_19625	chr-1	+	16405	3689	5558	81026817	62297109	62298962
contig_19988	chr-1	+	41329	14560	17495	81026817	59933452	68418298
contig_22583	chr-1	-	7678	4397	6861	81026817	46505591	80470497
contig_5166	chr-1	-	12936	1627	3355	81026817	62659445	62661535
contig_13008	chr-1	+	26892	2026	3635	81026817	62818341	62819948
contig_9882	chr-1	-	4957	115	2956	81026817	49554491	76326913
contig_6761	chr-1	-	17401	412	11559	81026817	45637058	71060693
contig_3475	chr-1	-	151023	39892	42722	81026817	49553913	76326349
contig_21761	chr-1	+	5505	24	2712	81026817	48110647	76330306
contig_2209	chr-1	+	42412	31669	33536	81026817	63026010	63028027
contig_5202	chr-1	-	47764	8984	10851	81026817	63026010	63028027
contig_2779	chr-1	-	38440	1	2686	81026817	48110647	76330306
contig_4698	chr-1	-	594687	205500	454350	81026817	40638350	71473947
contig_23954	chr-1	+	415156	130647	345396	81026817	59051961	71920586
contig_9442	chr-1	+	10751	51	10533	81026817	28365708	80609661
contig_11115	chr-1	-	206240	16099	190798	81026817	33503269	70758020
contig_2436	chr-1	-	327531	98639	128946	81026817	2497316	72729445
contig_2585	chr-1	+	55753	9067	20161	81026817	59963285	68436039
contig_14801	chr-1	+	12595	1539	3487	81026817	63723218	63725116
contig_14840	chr-1	-	7826	121	3488	81026817	63677997	63786169
contig_10716	chr-1	+	10813	6318	9390	81026817	63677997	63786169
contig_1487	chr-1	-	325106	30018	33703	81026817	63677882	63786169
contig_4356	chr-1	-	208969	29418	151260	81026817	16052712	67800638
contig_9495	chr-1	-	207996	8889	207933	81026817	26436407	70758020
contig_16339	chr-1	-	32848	23319	25494	81026817	64021942	64024117
contig_16340	chr-1	-	39194	25352	27512	81026817	64021942	64024117
contig_9162	chr-1	+	10244	846	7471	81026817	64021444	64028301
contig_17850	chr-1	-	27457	21602	25147	81026817	59963244	68436217
contig_24656	chr-1	-	10132	60	3065	81026817	64211824	64214844
contig_2803	chr-1	-	275599	14027	192491	81026817	58181955	73783423
contig_22376	chr-1	-	6437	28	3240	81026817	64371182	64374342
contig_9962	chr-1	-	13990	2254	5998	81026817	64371182	64375025
contig_371	chr-1	+	730679	28789	427334	81026817	35233180	68436217
contig_10325	chr-1	-	14344	8098	11379	81026817	50464456	72434274
contig_2558	chr-1	-	33013	24693	28299	81026817	59963336	68436217
contig_6696	chr-1	-	43844	5417	8590	81026817	50464704	72434033
contig_3189	chr-1	+	195176	15830	126326	81026817	59963285	68435359
contig_15810	chr-1	-	30191	16366	18736	81026817	59968646	68434911
contig_13272	chr-1	+	53447	22981	27277	81026817	59963244	68436091
contig_11043	chr-1	+	256565	10642	130269	81026817	47403397	72085955
contig_12738	chr-1	+	19079	12176	16235	81026817	59963285	68436217
contig_13538	chr-1	+	15474	43	4087	81026817	59963285	68436217
contig_2708	chr-1	-	20485	4631	8602	81026817	59963336	68436217
contig_1866	chr-1	+	95696	4423	65194	81026817	28365654	80609715
contig_21829	chr-1	+	238839	51366	238797	81026817	59963285	68436217
contig_2602	chr-1	-	100241	56144	77724	81026817	40890223	68283359
contig_3185	chr-1	+	35872	5503	10141	81026817	59963285	68436217
contig_1949	chr-1	+	49579	1876	6507	81026817	59963285	68436217
contig_1950	chr-1	-	105307	2029	6667	81026817	59963285	68436217
contig_1636	chr-1	+	62687	18461	59151	81026817	35957458	75988767
contig_23417	chr-1	+	90898	3000	11174	81026817	59963285	68436217
contig_2334	chr-1	+	160331	51050	128018	81026817	59963244	68436217
contig_6560	chr-1	+	126020	1606	100155	81026817	57098976	78171426
contig_540	chr-1	-	381057	87540	307235	81026817	36149275	67438305
contig_2559	chr-1	-	173201	73991	119634	81026817	33738881	67800670
contig_2296	chr-1	+	199696	120716	194935	81026817	64476132	68715025
contig_23355	chr-1	-	192479	94306	151493	81026817	2497563	71060693
contig_2427	chr-1	-	218909	20327	147392	81026817	54597230	70757764
contig_3601	chr-1	+	63087	33785	38876	81026817	67254767	67260850
contig_6006	chr-1	+	11845	8548	10401	81026817	67310668	67312538
contig_2410	chr-1	+	70643	1925	40547	81026817	33207317	78036138
contig_10167	chr-1	-	27973	2144	21393	81026817	55970314	76736515
contig_21665	chr-1	-	18702	14434	16626	81026817	67797932	67800638
contig_18873	chr-1	-	24640	5999	7452	81026817	67799095	67800565
contig_19042	chr-1	-	17738	5805	6599	81026817	62298171	73534601
contig_23726	chr-1	-	50067	22663	29540	81026817	58378074	71920839
contig_1953	chr-1	-	395558	7	379086	81026817	28648988	72956604
contig_8796	chr-1	+	39460	15322	18617	81026817	68266090	68396725
contig_22952	chr-1	+	46476	8432	12141	81026817	68266090	68396725
contig_10406	chr-1	-	4839	1260	2891	81026817	68266090	68396725
contig_20720	chr-1	+	16521	12407	13642	81026817	68266090	68396725
contig_3177	chr-1	+	30180	4728	8442	81026817	68266090	68396725
contig_9475	chr-1	-	27575	18792	22485	81026817	68266090	68396725
contig_16263	chr-1	-	10224	3506	6901	81026817	68266090	68396725
contig_19550	chr-1	-	34366	15903	23898	81026817	68266090	68396725
contig_8324	chr-1	+	19127	9727	14155	81026817	65026541	71920819
contig_6319	chr-1	-	2638	93	2105	81026817	68434051	68436039
contig_12903	chr-1	+	165345	25264	45508	81026817	2497375	79874785
contig_21551	chr-1	-	24121	18716	21622	81026817	68618553	68622509
contig_21554	chr-1	-	13051	10130	13030	81026817	68618553	68622509
contig_18212	chr-1	+	18889	2561	16245	81026817	67797191	79028665
contig_13404	chr-1	-	4431	104	2671	81026817	68912310	68914839
contig_16505	chr-1	-	26212	3656	6274	81026817	68912310	68914839
contig_16549	chr-1	-	39136	105	2697	81026817	68912310	68914839
contig_20462	chr-1	-	8687	908	3463	81026817	68912310	68914839
contig_22042	chr-1	-	20896	571	2647	81026817	68912775	68914839
contig_2674	chr-1	-	152945	69252	83078	81026817	69006848	69080698
contig_9784	chr-1	-	843328	255508	664849	81026817	57098932	70343943
contig_22844	chr-1	+	113475	19952	62994	81026817	67796789	71060693
contig_3061	chr-1	+	91362	44779	52721	81026817	56743143	72729445
contig_16435	chr-1	-	32459	7882	26652	81026817	58548532	80357375
contig_6192	chr-1	+	159283	19384	66879	81026817	67797191	71920819
contig_24141	chr-1	-	22139	5275	6680	81026817	70186285	70187721
contig_19859	chr-1	-	12042	1858	7072	81026817	60431880	80357375
contig_3369	chr-1	+	27836	12123	14883	81026817	70675422	70678170
contig_7141	chr-1	-	172821	123189	126346	81026817	70675422	70678658
contig_7072	chr-1	-	78803	5105	10107	81026817	70675422	70680421
contig_9077	chr-1	-	235121	10208	223641	81026817	2873708	80444872
contig_20879	chr-1	+	9461	8	2479	81026817	46505771	80470497
contig_24355	chr-1	-	31244	17961	21164	81026817	71057273	71060487
contig_14836	chr-1	-	8128	348	3825	81026817	71057273	71060693
contig_16100	chr-1	-	22350	13461	16937	81026817	71057273	71060693
contig_16531	chr-1	+	5390	361	3832	81026817	71057273	71060693
contig_18762	chr-1	-	25499	21946	25390	81026817	71057273	71060693
contig_22985	chr-1	+	9016	398	3868	81026817	71057273	71060693
contig_8489	chr-1	+	12634	2193	5663	81026817	71057273	71060693
contig_9341	chr-1	-	9053	4308	7773	81026817	71057273	71060693
contig_16797	chr-1	-	29200	24410	28985	81026817	71881996	71886603
contig_7478	chr-1	-	64365	50526	54756	81026817	71916676	71920839
contig_1412	chr-1	+	201899	117822	185352	81026817	20421180	72667728
contig_10911	chr-1	+	13095	6900	7440	81026817	72769852	72770557
contig_1954	chr-1	-	86305	48147	71256	81026817	72934623	72956604
contig_22168	chr-1	-	24290	20688	24227	81026817	73779620	73783979
contig_11904	chr-1	+	17138	3771	5828	81026817	74162579	74164674
contig_3033	chr-1	+	28471	2951	5223	81026817	74375307	74377792
contig_19571	chr-1	+	21880	8811	11003	81026817	74375499	74377947
contig_2819	chr-1	-	516109	50032	382402	81026817	24527000	75866240
contig_23928	chr-1	-	75518	3376	47384	81026817	74598053	74642321
contig_19261	chr-1	-	7919	689	4196	81026817	75039014	75042739
contig_8881	chr-1	-	17831	897	2610	81026817	75061214	75062925
contig_21091	chr-1	+	5955	992	2227	81026817	75585118	75586494
contig_19747	chr-1	-	8587	218	2708	81026817	75585367	75587392
contig_2818	chr-1	+	64949	6554	52116	81026817	76175998	76220187
contig_16620	chr-1	+	11745	8895	10431	81026817	76735104	76736638
contig_12378	chr-1	+	8611	199	2631	81026817	76754652	76757212
contig_1638	chr-1	+	168701	120597	128068	81026817	76888328	78036138
contig_12244	chr-1	-	64810	57560	64788	81026817	76888328	78035842
contig_8570	chr-1	-	49660	26748	34263	81026817	76888328	78036127
contig_8210	chr-1	+	11241	5818	7604	81026817	79026977	79028907
contig_15438	chr-1	+	8646	2139	4344	81026817	79501807	79503982
contig_20874	chr-1	-	6179	127	2515	81026817	79814873	79817339
contig_14303	chr-1	-	36446	32406	34516	81026817	80354986	80357375
contig_19939	chr-1	-	7324	4421	6709	81026817	80354986	80357375
contig_2387	chr-1	-	96238	71431	73537	81026817	80354986	80357375
contig_15151	chr-1	-	10071	470	2162	81026817	80355470	80357212
contig_3879	chr-2	-	186235	60929	83191	74586745	290885	313922
contig_7181	chr-2	+	124680	9070	10116	74586745	686376	688744
contig_5835	chr-2	-	35774	29476	31749	74586745	736942	1758612
contig_3490	chr-2	+	207726	4115	11520	74586745	1462775	1469535
contig_2954	chr-2	+	44924	26859	34105	74586745	1463036	1469535
contig_15427	chr-2	-	16856	9692	12399	74586745	679563	3286943
contig_2146	chr-2	+	354335	243444	287610	74586745	1462775	24291941
contig_18662	chr-2	-	715617	21290	691264	74586745	686688	70174397
contig_13142	chr-2	+	36790	13953	22691	74586745	2472200	2481284
contig_6684	chr-2	-	281768	169098	177820	74586745	2472200	2481284
contig_1902	chr-2	+	172689	58352	88000	74586745	2472368	5177448
contig_9036	chr-2	-	10362	7802	10327	74586745	3387384	3389694
contig_2268	chr-2	+	421868	288	210299	74586745	2748034	6551888
contig_13547	chr-2	+	5428	85	1215	74586745	3825734	3827015
contig_941	chr-2	+	419171	17241	41407	74586745	1419037	56559252
contig_2741	chr-2	-	353123	123620	133052	74586745	4442733	4454288
contig_9319	chr-2	-	91744	63510	70407	74586745	4638977	4645051
contig_2180	chr-2	+	238859	55235	111395	74586745	1462775	43203474
contig_2899	chr-2	-	50173	1791	7837	74586745	2757125	46661867
contig_7353	chr-2	+	33896	251	1967	74586745	4520702	6206251
contig_7427	chr-2	+	59177	1954	6611	74586745	5021489	5177453
contig_21064	chr-2	-	43689	31544	34818	74586745	5297925	5301349
contig_1751	chr-2	-	252697	68533	207564	74586745	1462775	43953757
contig_17897	chr-2	-	23367	3397	6684	74586745	5874104	5877410
contig_21988	chr-2	-	6747	2366	5647	74586745	5874104	5877410
contig_1373	chr-2	-	594500	164646	458490	74586745	4578155	41159783
contig_21654	chr-2	-	15482	2117	5256	74586745	6358508	6361629
contig_1162	chr-2	-	573898	351325	550476	74586745	4548205	50304909
contig_7959	chr-2	-	23206	14599	17597	74586745	6688655	6691776
contig_1484	chr-2	+	238928	86930	164697	74586745	1462775	50304909
contig_18421	chr-2	+	16184	8557	9416	74586745	6270828	7728093
contig_951	chr-2	+	231818	10	42574	74586745	1464236	18595254
contig_1696	chr-2	-	606544	4857	240144	74586745	1462775	53578705
contig_13779	chr-2	+	120250	91948	97877	74586745	7342061	8266988
contig_11831	chr-2	-	22759	11484	13419	74586745	1835584	14510769
contig_11722	chr-2	+	14536	6456	12997	74586745	2671691	69263116
contig_19725	chr-2	+	10747	7557	10138	74586745	8640844	8643647
contig_23702	chr-2	-	19086	3932	18859	74586745	1919827	10642317
contig_23524	chr-2	-	15817	212	1979	74586745	1097822	71847206
contig_22462	chr-2	+	178831	27815	35433	74586745	8838102	8845497
contig_825	chr-2	+	2758	178	2326	74586745	1835584	14510769
contig_3342	chr-2	+	22428	6218	18810	74586745	909572	10992159
contig_3412	chr-2	+	224385	14	111998	74586745	1417277	51246360
contig_7730	chr-2	-	43452	4651	18693	74586745	4443902	64270596
contig_882	chr-2	+	943408	59446	870192	74586745	2472208	67065402
contig_18692	chr-2	-	174989	54311	56248	74586745	7342066	16520954
contig_17058	chr-2	+	69065	19014	21148	74586745	11008116	11010737
contig_6859	chr-2	-	7735	59	3002	74586745	11042630	11045749
contig_16746	chr-2	-	51048	19212	22087	74586745	11042616	11045782
contig_14033	chr-2	+	44170	4861	7868	74586745	11042622	11045782
contig_16877	chr-2	-	5819	1535	4573	74586745	11042622	11045782
contig_18951	chr-2	+	6853	4	3052	74586745	11042622	11045782
contig_20876	chr-2	-	6818	4	3011	74586745	11042622	11045782
contig_21763	chr-2	-	13289	21	3045	74586745	11042622	11045782
contig_23099	chr-2	+	7862	4684	7690	74586745	11042622	11045782
contig_24190	chr-2	+	14595	4300	7295	74586745	11042622	11045782
contig_3308	chr-2	+	49161	34681	37719	74586745	11042622	11045782
contig_12056	chr-2	-	14970	17	2993	74586745	11042635	11045782
contig_24349	chr-2	-	10528	1114	3046	74586745	11043848	11045782
contig_2687	chr-2	-	86333	16846	82216	74586745	2774629	56219334
contig_797	chr-2	+	75150	39529	48591	74586745	12624869	12635919
contig_7352	chr-2	+	253043	74836	217918	74586745	4520702	73790012
contig_9985	chr-2	-	70598	1048	4600	74586745	13114499	13118072
contig_24470	chr-2	-	105278	20662	103674	74586745	2163201	14970195
contig_12869	chr-2	-	80994	14528	16128	74586745	1617766	25796766
contig_14843	chr-2	-	27229	3070	9745	74586745	14051054	14056867
contig_20389	chr-2	-	12466	5013	7056	74586745	14237891	14239981
contig_6502	chr-2	+	8703	1608	3652	74586745	14237891	14239981
contig_2793	chr-2	+	82764	77817	82747	74586745	14383045	14389717
contig_906	chr-2	-	64013	57138	62970	74586745	14383045	14389822
contig_800	chr-2	-	475250	139937	326955	74586745	4876970	16467518
contig_2736	chr-2	-	31565	1226	8295	74586745	14962658	14969713
contig_7248	chr-2	-	6904	1650	3232	74586745	14966149	14967800
contig_10350	chr-2	-	14037	4805	8243	74586745	14965602	14969171
contig_5380	chr-2	-	19778	14681	17532	74586745	14966149	14969088
contig_23583	chr-2	-	109520	62945	69331	74586745	14971894	14977860
contig_6547	chr-2	+	36599	23017	35605	74586745	7197949	43915166
contig_1032	chr-2	+	85009	17534	71618	74586745	1462775	33111446
contig_3107	chr-2	+	470650	9307	431897	74586745	686485	57011654
contig_22901	chr-2	+	107457	78510	94451	74586745	11042635	23370037
contig_4973	chr-2	-	3658	431	3339	74586745	15870182	15873024
contig_955	chr-2	+	408075	77063	182676	74586745	1462775	33109607
contig_21699	chr-2	+	74021	53242	54893	74586745	12756140	17971734
contig_5072	chr-2	+	15525	815	8544	74586745	15510610	18464105
contig_5203	chr-2	-	120671	56398	77000	74586745	6358508	25796772
contig_4112	chr-2	+	83717	54	29891	74586745	14383045	22686400
contig_16536	chr-2	+	210752	88081	210497	74586745	6204563	52007866
contig_1941	chr-2	+	454985	1852	87038	74586745	15417774	18647784
contig_1337	chr-2	-	272161	75725	91405	74586745	7342061	65268820
contig_1786	chr-2	+	293266	72361	172983	74586745	1464236	72868175
contig_17537	chr-2	+	36666	33867	36316	74586745	6105958	26604405
contig_12507	chr-2	+	129875	11833	98242	74586745	12128921	39352767
contig_22913	chr-2	-	21526	2104	4100	74586745	16768059	16770043
contig_11171	chr-2	+	18365	10384	12334	74586745	16768089	16770043
contig_13004	chr-2	+	6113	37	2009	74586745	16768089	16770043
contig_14809	chr-2	-	6588	168	6490	74586745	16768089	16770043
contig_18706	chr-2	-	20520	920	2894	74586745	16768089	16770043
contig_19956	chr-2	-	10633	3636	5597	74586745	16768089	16770043
contig_21032	chr-2	+	6607	2860	4839	74586745	16768089	16770043
contig_21203	chr-2	-	15357	9603	15320	74586745	16768089	16770043
contig_22061	chr-2	+	8384	37	1995	74586745	16768089	16770043
contig_23855	chr-2	+	26484	19651	21614	74586745	16768089	16770043
contig_5206	chr-2	+	9604	3563	8152	74586745	16768089	16770043
contig_7715	chr-2	+	4823	110	4670	74586745	16768089	16770043
contig_9972	chr-2	-	37228	13445	15403	74586745	16768089	16770043
scaffold_7201	chr-2	+	82934	52756	54732	74586745	16768089	16770043
contig_1560	chr-2	-	49027	21789	27219	74586745	16768089	16770043
contig_14787	chr-2	-	17391	10793	12700	74586745	16768167	16770043
contig_6895	chr-2	+	8301	5014	7231	74586745	15511416	18464048
contig_6894	chr-2	+	8088	1416	5321	74586745	15511414	18464048
contig_18592	chr-2	+	8268	218	7615	74586745	16768089	17049157
contig_21456	chr-2	+	8845	1211	2581	74586745	17046372	17047985
contig_23461	chr-2	+	169160	64333	152423	74586745	16768089	21293957
contig_15062	chr-2	-	110654	97368	110559	74586745	4520702	73791704
contig_2154	chr-2	-	66412	19420	22698	74586745	6104926	26605237
contig_6355	chr-2	+	79754	34180	70989	74586745	16010907	66960324
contig_2581	chr-2	-	646751	134013	563272	74586745	2474139	71920479
contig_18364	chr-2	-	28106	12106	15491	74586745	14355368	21293746
contig_12360	chr-2	-	4162	3	1781	74586745	14356048	21293056
contig_1479	chr-2	+	135014	28609	58879	74586745	8838100	26688856
contig_1693	chr-2	-	166688	64001	91350	74586745	9744709	18297966
contig_19020	chr-2	-	65858	47925	50292	74586745	17929636	17993073
contig_2716	chr-2	+	171616	2106	171471	74586745	2774629	70865992
contig_2866	chr-2	-	9730	754	5987	74586745	18292366	18297966
contig_2360	chr-2	+	496996	80865	496989	74586745	2540511	67228327
contig_3184	chr-2	+	35746	11372	14521	74586745	4876931	32493572
contig_8946	chr-2	+	8469	1637	8306	74586745	8838123	60761541
contig_9296	chr-2	-	92205	40716	46556	74586745	18689675	18725497
contig_10722	chr-2	-	22008	10784	16461	74586745	18689697	18725475
contig_14266	chr-2	-	153289	84469	89233	74586745	18690310	18724862
contig_10721	chr-2	-	20274	9447	14735	74586745	18689669	18725503
contig_18156	chr-2	-	41083	19981	23308	74586745	4876970	32493572
contig_6889	chr-2	-	18312	4047	7336	74586745	4876970	32493572
contig_1917	chr-2	-	25986	16504	19722	74586745	4876970	32493572
contig_2854	chr-2	-	43236	12569	29339	74586745	16619902	22441406
contig_7675	chr-2	+	398188	32909	211666	74586745	4426996	68613975
contig_17007	chr-2	-	17299	14393	16030	74586745	19185522	19187141
contig_1324	chr-2	-	148542	8462	144291	74586745	4876970	39213723
contig_11984	chr-2	+	53958	5155	15648	74586745	7323666	61415893
contig_529	chr-2	+	239584	117823	237401	74586745	10988745	20507287
contig_3193	chr-2	-	858452	281562	819496	74586745	16038998	54924737
contig_727	chr-2	+	250288	17608	148170	74586745	20095639	20458979
contig_1204	chr-2	+	2367658	328510	2015808	74586745	8959071	64348091
contig_15058	chr-2	-	87409	100	82480	74586745	4520702	73791704
contig_24549	chr-2	-	34653	1494	5753	74586745	16768089	27973424
contig_17123	chr-2	+	337217	63420	211723	74586745	2540206	65035717
contig_9879	chr-2	-	9977	10	2809	74586745	19596579	22349440
contig_8983	chr-2	+	178650	136808	151565	74586745	4876970	32493572
contig_10710	chr-2	-	126413	14	114493	74586745	18689697	35022794
contig_13047	chr-2	-	82608	11456	81746	74586745	2748632	67027957
contig_4455	chr-2	+	522595	20366	448530	74586745	15510610	67180316
contig_14032	chr-2	+	94691	10253	78415	74586745	11042622	44349063
contig_7909	chr-2	-	145462	48442	85257	74586745	18689669	29119398
contig_4226	chr-2	+	115407	42936	57324	74586745	16741708	34079714
contig_21607	chr-2	-	15542	11629	15490	74586745	11988843	33708226
contig_4329	chr-2	+	214166	55754	194817	74586745	16617068	50461954
contig_3303	chr-2	+	364373	12817	143313	74586745	1468219	69262105
contig_6871	chr-2	-	4652	276	2442	74586745	23343919	23346051
contig_2714	chr-2	-	108066	41927	102013	74586745	23450744	23854982
contig_17116	chr-2	-	110434	13391	109458	74586745	23540296	23629297
contig_335	chr-2	+	918906	152104	748604	74586745	909572	68275708
contig_14478	chr-2	+	29577	10075	28409	74586745	21778022	25000302
contig_17113	chr-2	-	97531	2867	24949	74586745	23701752	23719170
contig_2438	chr-2	+	159303	33322	104358	74586745	14051054	57345150
contig_1834	chr-2	-	101466	17309	31245	74586745	14053396	24980438
contig_12144	chr-2	+	13701	4330	6260	74586745	6688823	55433876
contig_1524	chr-2	-	255621	82276	238738	74586745	5965325	44348954
contig_23423	chr-2	+	132186	56934	98523	74586745	15510610	54924220
contig_18155	chr-2	+	105769	68324	70779	74586745	18292366	42141208
contig_24191	chr-2	-	69262	7189	69218	74586745	11988843	48307570
contig_16588	chr-2	-	106824	956	46930	74586745	16768167	50461954
contig_5041	chr-2	-	187620	146019	182323	74586745	1617766	65398669
contig_18255	chr-2	-	465597	86275	442092	74586745	6358508	26030892
contig_2713	chr-2	+	97291	28794	94513	74586745	23450744	56784974
contig_23340	chr-2	-	110342	1225	6982	74586745	16741235	34080185
contig_24139	chr-2	+	83970	27163	71750	74586745	6549142	55324779
contig_18326	chr-2	+	218796	86964	119346	74586745	18292366	71697605
contig_6032	chr-2	+	41776	13879	15839	74586745	1099012	60219842
contig_14877	chr-2	+	327718	26612	189618	74586745	12181860	46888399
contig_18602	chr-2	+	252700	33079	211158	74586745	6383352	45550139
contig_13298	chr-2	+	326585	68706	240444	74586745	25383771	25561389
contig_2755	chr-2	+	69273	484	5897	74586745	16742476	34078951
contig_1036	chr-2	+	98636	26956	91425	74586745	16739549	34082282
contig_2390	chr-2	+	247566	71973	78090	74586745	16742476	34078951
contig_1188	chr-2	-	39303	7523	16818	74586745	16739549	34082282
contig_5818	chr-2	-	67608	58665	67593	74586745	16739549	34082282
contig_4653	chr-2	-	44516	38	8873	74586745	16739818	34082013
contig_4652	chr-2	-	48352	14	8853	74586745	16739549	34082282
contig_554	chr-2	-	254283	113971	122680	74586745	16739557	34082274
contig_7637	chr-2	+	83622	56575	82599	74586745	17045349	44226339
contig_1695	chr-2	+	731149	122553	731075	74586745	14383045	67987863
contig_6693	chr-2	+	212211	137617	211949	74586745	19682051	31907618
contig_5568	chr-2	+	98198	28541	50318	74586745	16742292	39214230
contig_1568	chr-2	+	240804	60220	158225	74586745	8651093	52007866
contig_4359	chr-2	-	356638	117196	272188	74586745	16741708	65033850
contig_1474	chr-2	-	104047	14	5284	74586745	18292366	42143843
contig_3967	chr-2	+	55171	6152	13401	74586745	21445122	42036072
contig_23427	chr-2	+	31567	5949	26981	74586745	16768089	38339239
contig_22611	chr-2	+	83668	28755	79732	74586745	11988843	40595329
contig_3280	chr-2	-	21488	14285	21413	74586745	19851142	29119333
contig_23629	chr-2	-	205030	11472	168585	74586745	27720115	27922460
contig_5040	chr-2	+	284593	112010	248370	74586745	6688766	38289473
contig_3160	chr-2	-	455092	1924	360675	74586745	2671691	50697157
contig_7927	chr-2	+	16906	1882	11715	74586745	13661861	34610762
contig_1340	chr-2	+	194457	43315	129438	74586745	19469940	47312698
contig_9433	chr-2	-	45250	31650	43985	74586745	28099060	28111408
contig_2480	chr-2	+	58507	358	5251	74586745	18292735	42143843
contig_2201	chr-2	+	121216	28924	33433	74586745	18292735	42143594
contig_6534	chr-2	+	297859	56215	205112	74586745	11345940	50304461
contig_15640	chr-2	+	118754	39881	54831	74586745	17045344	64022142
contig_3325	chr-2	+	1209530	455763	1184397	74586745	686576	68780395
contig_5104	chr-2	+	56030	29961	31483	74586745	28513015	28514543
contig_7717	chr-2	+	29906	3817	10376	74586745	17045372	48308641
contig_4129	chr-2	+	241470	17671	206510	74586745	6549202	64186869
contig_6686	chr-2	+	161620	28771	122168	74586745	19469940	47312698
contig_10001	chr-2	+	7893	1136	5384	74586745	8651225	65626974
contig_8616	chr-2	+	73902	27598	57679	74586745	29029761	29051249
contig_10474	chr-2	-	31504	6552	13849	74586745	19931034	60494862
contig_15977	chr-2	-	5443	100	4323	74586745	8651093	49360547
contig_3258	chr-2	+	105431	75873	80675	74586745	18292759	42143843
contig_6632	chr-2	+	337635	2368	78936	74586745	21387993	31907999
contig_22858	chr-2	-	25688	19873	21639	74586745	29224244	29225994
contig_6945	chr-2	+	7126	5078	6852	74586745	29224244	29225994
contig_6946	chr-2	+	8030	3997	5770	74586745	29224244	29225994
contig_21188	chr-2	-	10362	3892	6307	74586745	15989802	68613212
contig_10004	chr-2	-	255002	164953	203189	74586745	8651214	65626590
contig_4763	chr-2	-	29152	17029	21308	74586745	8651218	49360518
contig_1153	chr-2	-	1037250	43207	962945	74586745	18719933	42966688
contig_19027	chr-2	-	6033	3353	5263	74586745	29904232	29941585
contig_10232	chr-2	+	150539	21587	107049	74586745	29344512	54468441
contig_8357	chr-2	-	146858	24587	126787	74586745	2748034	47397138
contig_15914	chr-2	+	238508	96102	193746	74586745	17045344	48308641
contig_15641	chr-2	-	10411	5244	8980	74586745	17045351	48308792
contig_5048	chr-2	-	217400	28217	31992	74586745	17045349	48308792
contig_5832	chr-2	-	70084	26238	30084	74586745	17045349	48308792
contig_11992	chr-2	+	19621	7291	11527	74586745	7171533	54523602
contig_2481	chr-2	-	107489	1079	20155	74586745	30237314	34609881
contig_9932	chr-2	-	6978	2062	4913	74586745	7171391	54524011
scaffold_8556	chr-2	-	958157	28593	939154	74586745	30538720	36729854
contig_999	chr-2	+	615794	69955	553400	74586745	4638977	70870008
contig_2490	chr-2	-	50224	24126	50200	74586745	21140329	33111446
contig_1488	chr-2	-	245450	97377	217549	74586745	23367528	38288049
contig_23379	chr-2	-	74900	28495	65691	74586745	31613773	31693642
contig_1920	chr-2	+	13085	12	6093	74586745	31901298	31907990
contig_2658	chr-2	+	20052	12633	18765	74586745	31901298	31907999
contig_19667	chr-2	-	6153	1846	5056	74586745	11345076	50461954
contig_1115	chr-2	+	178652	52961	162492	74586745	29114604	39213723
contig_6118	chr-2	+	15803	4994	15723	74586745	7171391	56357617
contig_1710	chr-2	+	384768	12452	234711	74586745	21778022	53936570
contig_3377	chr-2	+	459322	118074	400535	74586745	16768089	69111628
contig_9013	chr-2	-	138205	31527	62449	74586745	27591142	34228143
contig_771	chr-2	-	692710	20275	590484	74586745	23852163	56720068
contig_2084	chr-2	-	514403	6178	360003	74586745	6694962	49506370
contig_12245	chr-2	+	65865	24780	27000	74586745	686485	67854471
contig_1653	chr-2	-	375946	38380	337802	74586745	17966374	70476448
contig_1200	chr-2	-	125930	51522	118057	74586745	17250817	65268820
contig_1225	chr-2	+	63531	22039	27837	74586745	33103135	33109489
contig_1226	chr-2	-	28324	3350	9463	74586745	33103135	33109632
contig_1508	chr-2	+	81925	2887	8867	74586745	33103135	33109632
contig_5637	chr-2	-	74076	47196	53158	74586745	33103135	33109632
contig_2799	chr-2	+	67768	17	4302	74586745	33105085	33109697
contig_4960	chr-2	-	23271	13464	19405	74586745	33104145	33111446
contig_1310	chr-2	+	54172	23	5057	74586745	33105085	33111446
contig_2923	chr-2	+	108001	29	5029	74586745	33105085	33111446
contig_923	chr-2	+	249676	9615	142576	74586745	8651093	65626326
contig_2552	chr-2	-	455823	24719	211361	74586745	6549202	41054254
contig_2297	chr-2	+	112225	29026	105690	74586745	31901298	46661867
contig_1031	chr-2	-	181605	73312	181584	74586745	33104145	56720068
contig_1103	chr-2	+	303197	24792	245513	74586745	13660456	49961022
contig_4876	chr-2	+	291194	73626	93925	74586745	33342403	33378140
contig_5978	chr-2	+	139831	12181	59060	74586745	33103135	40524765
contig_1273	chr-2	-	149900	28067	139900	74586745	6689696	65268820
contig_781	chr-2	+	507313	13	345207	74586745	12559415	39016065
contig_21685	chr-2	-	5576	38	3402	74586745	23886838	39015671
contig_5796	chr-2	+	93267	40796	74732	74586745	686684	67854363
contig_5717	chr-2	+	14189	12019	14022	74586745	33941095	33942960
contig_17386	chr-2	+	19946	17462	19923	74586745	8653563	65627130
contig_3464	chr-2	+	126208	99	117482	74586745	31901298	52007866
contig_14882	chr-2	-	23573	5874	10063	74586745	21533816	46888399
contig_23975	chr-2	+	56174	6458	50191	74586745	29661717	38289473
contig_556	chr-2	+	283560	50555	234795	74586745	5965433	43915166
contig_20815	chr-2	-	10867	6642	10763	74586745	21533816	46888283
contig_23895	chr-2	+	220243	24163	31372	74586745	21533967	46888399
contig_11655	chr-2	+	186376	46827	51100	74586745	21533816	46888397
contig_1677	chr-2	-	290375	78206	81151	74586745	27590761	44226339
contig_15917	chr-2	-	10229	6186	7783	74586745	34607295	34609110
contig_17487	chr-2	+	23976	1655	3822	74586745	34607295	34609571
contig_2395	chr-2	-	87176	75480	78115	74586745	34607295	34610048
contig_10932	chr-2	+	4221	1219	3783	74586745	34607300	34610048
contig_15918	chr-2	-	8825	2014	2960	74586745	34608209	34609145
contig_24403	chr-2	-	57605	29853	32240	74586745	34607300	34661492
contig_856	chr-2	+	59246	11347	13419	74586745	34607696	34661586
contig_7068	chr-2	-	6083	305	2601	74586745	34607569	34661703
contig_24040	chr-2	-	45616	10526	12112	74586745	34608209	34661487
contig_18931	chr-2	-	39250	31107	32799	74586745	34608356	34661703
contig_17214	chr-2	+	7492	1621	6019	74586745	8651214	65626629
contig_21218	chr-2	+	10657	2907	4478	74586745	34704042	34705540
contig_17171	chr-2	+	9874	7604	9188	74586745	34704042	34705558
contig_7666	chr-2	+	98866	59069	60662	74586745	34704042	34705558
contig_11346	chr-2	+	9920	5028	6575	74586745	34704077	34705558
contig_1406	chr-2	-	276721	128296	236671	74586745	14966149	53898364
contig_4114	chr-2	+	97147	31852	52146	74586745	17045344	48307784
contig_12285	chr-2	+	7829	4204	7504	74586745	35019563	35022794
contig_13788	chr-2	+	23748	1800	5104	74586745	35019563	35022794
contig_15627	chr-2	-	21121	554	3852	74586745	35019563	35022794
contig_15911	chr-2	+	33896	30352	33690	74586745	35019563	35022794
contig_1619	chr-2	-	409182	162427	375468	74586745	17711034	47397081
contig_3743	chr-2	-	1068665	187387	992128	74586745	21533816	65269692
contig_2904	chr-2	-	402389	87801	359856	74586745	8838126	49587216
contig_12029	chr-2	-	36150	14299	16059	74586745	29224245	42966679
contig_8915	chr-2	-	57486	13097	14850	74586745	29224245	42966679
contig_8934	chr-2	+	635297	58632	436075	74586745	1394014	66850063
contig_11385	chr-2	+	17727	7473	9186	74586745	29224244	42966688
contig_1073	chr-2	-	531355	93	409382	74586745	11043848	51688915
contig_2192	chr-2	+	42286	36672	41589	74586745	8651228	65627130
contig_7827	chr-2	-	15831	683	3301	74586745	30671418	39503421
contig_3981	chr-2	-	72160	23411	26540	74586745	4876970	66850063
contig_16446	chr-2	-	12074	10548	11805	74586745	29224245	42966679
contig_2167	chr-2	-	24956	2672	13177	74586745	14966149	54465707
contig_23329	chr-2	+	270686	86880	250948	74586745	36102005	36281702
contig_5146	chr-2	+	98431	21161	56181	74586745	35958549	38287927
contig_1041	chr-2	-	65627	11254	62486	74586745	35019563	39213723
contig_12998	chr-2	-	59413	17598	33465	74586745	22627127	65268166
contig_1671	chr-2	-	126988	82064	118072	74586745	35958549	39213723
contig_8836	chr-2	+	8473	4145	5801	74586745	36714603	36715604
contig_22990	chr-2	+	28000	25288	26440	74586745	36728775	36729882
contig_1072	chr-2	+	383533	87744	293933	74586745	4876970	66850063
contig_2542	chr-2	-	68062	17104	25193	74586745	19596579	69111686
contig_23328	chr-2	-	131633	810	109465	74586745	22346733	45556843
contig_2388	chr-2	+	512034	9525	427350	74586745	2472200	62788474
contig_8839	chr-2	-	169415	7372	138584	74586745	36557666	39747947
contig_14450	chr-2	-	4594	1615	4231	74586745	2411950	71408446
contig_20718	chr-2	+	18801	12560	18141	74586745	33025015	37791162
contig_5745	chr-2	+	7129	1843	2652	74586745	5795524	65956927
contig_23393	chr-2	-	188849	63054	188751	74586745	31901298	56343617
contig_10245	chr-2	+	14888	8833	11051	74586745	37225639	37227902
contig_20976	chr-2	-	3929	1303	3521	74586745	37225639	37227902
contig_7898	chr-2	-	5370	214	1233	74586745	37266792	37267813
contig_3188	chr-2	+	75942	25395	27781	74586745	686576	67854471
contig_6640	chr-2	+	464914	916	367179	74586745	33861975	54924709
contig_3197	chr-2	+	17373	1592	13294	74586745	14388265	37929224
contig_1243	chr-2	+	119474	16164	91009	74586745	11988917	65035717
contig_16242	chr-2	-	161909	79745	147928	74586745	4876970	66850063
contig_16329	chr-2	-	8717	50	4292	74586745	37786945	37791162
contig_1861	chr-2	+	161234	37024	41238	74586745	37786945	37791162
contig_20387	chr-2	+	63326	40861	45086	74586745	37786945	37791162
contig_9179	chr-2	-	7734	2801	7065	74586745	37786945	37791162
contig_14115	chr-2	+	19062	10478	14674	74586745	37786962	37791162
contig_16448	chr-2	-	23597	17473	20552	74586745	37788100	37791162
contig_8927	chr-2	-	17422	2686	5784	74586745	37788100	37791162
contig_17406	chr-2	+	36980	33859	36317	74586745	37788713	37791162
contig_11624	chr-2	-	11497	104	1952	74586745	37789309	37791162
contig_23520	chr-2	-	126442	995	44471	74586745	6551189	39016065
contig_3304	chr-2	-	13372	3444	5744	74586745	23887491	50304909
contig_1231	chr-2	-	327175	19087	319242	74586745	36723407	61270026
contig_8215	chr-2	+	21432	18496	21417	74586745	23886891	47164529
contig_21496	chr-2	+	309479	26481	171230	74586745	29114604	49360414
contig_13836	chr-2	-	16317	4516	6721	74586745	38197749	38199776
contig_20554	chr-2	-	20912	16412	19947	74586745	38197749	38201217
contig_15722	chr-2	-	5589	766	3536	74586745	38198417	38201217
contig_13696	chr-2	+	13026	3221	5808	74586745	38286274	38289485
contig_15750	chr-2	+	72530	20050	22255	74586745	36087763	40477254
contig_2627	chr-2	+	13809	2724	3824	74586745	38405020	38406072
contig_19909	chr-2	-	10518	53	7237	74586745	8651093	65627130
contig_11231	chr-2	+	137014	15243	35716	74586745	38498759	38502586
contig_16344	chr-2	-	22622	13560	21604	74586745	38197749	39016065
contig_8473	chr-2	+	174005	9518	151118	74586745	31977593	57982986
contig_1239	chr-2	+	13657	37	12609	74586745	31901340	69263116
contig_23460	chr-2	+	85958	202	54710	74586745	31901349	62006515
contig_1978	chr-2	+	212635	106070	144691	74586745	33940471	66960324
contig_11304	chr-2	-	65448	12253	14670	74586745	38930219	38932670
contig_15046	chr-2	-	128165	76972	86607	74586745	38993683	39003969
contig_1656	chr-2	-	135964	63081	66897	74586745	39012525	39016065
contig_19025	chr-2	-	18752	6531	10237	74586745	39012525	39016065
contig_20079	chr-2	-	6600	219	3969	74586745	39012529	39016065
contig_2611	chr-2	-	56742	35146	40171	74586745	39089760	39095076
contig_16179	chr-2	+	44308	29678	39266	74586745	39089760	39096982
contig_15851	chr-2	+	20408	1359	4414	74586745	19184800	64186932
contig_350	chr-2	+	919430	161634	868497	74586745	2803190	73649381
contig_20342	chr-2	+	265076	40742	248887	74586745	33940214	39761340
contig_2454	chr-2	+	210648	143246	181670	74586745	37786945	61354295
contig_9711	chr-2	-	12609	8224	10591	74586745	8653731	65627130
contig_18069	chr-2	+	45847	41833	45457	74586745	40249922	40253657
contig_21951	chr-2	+	20088	58	2656	74586745	38286265	46661876
contig_13839	chr-2	+	9626	13	2638	74586745	38286274	46661867
contig_1185	chr-2	+	920949	31502	879195	74586745	16027157	53898364
contig_1789	chr-2	+	282249	72430	183958	74586745	8651214	65626629
contig_11941	chr-2	+	15110	12519	15092	74586745	38286274	46661867
contig_10309	chr-2	-	13858	6787	8497	74586745	40474906	40476987
contig_12209	chr-2	+	40718	8540	10694	74586745	40474906	40477150
contig_20341	chr-2	-	6809	2020	4160	74586745	40474906	40477150
contig_13648	chr-2	+	18736	585	2793	74586745	40474906	40477254
contig_12077	chr-2	+	31222	28462	30661	74586745	40474906	40477254
contig_2947	chr-2	+	189589	29	32722	74586745	33105085	69111529
contig_21235	chr-2	+	18250	234	1846	74586745	39738791	41158329
contig_24400	chr-2	+	12826	6339	8311	74586745	40593121	40595329
contig_9444	chr-2	-	7746	4633	6922	74586745	40593121	40595329
contig_16067	chr-2	+	7921	748	2993	74586745	40593121	40595365
contig_10627	chr-2	-	3990	524	2854	74586745	40593121	40595365
contig_10872	chr-2	-	14432	10373	12699	74586745	40593121	40595365
contig_10885	chr-2	-	9516	420	2763	74586745	40593121	40595365
contig_13392	chr-2	-	34881	16807	19133	74586745	40593121	40595365
contig_22767	chr-2	+	21715	4999	7185	74586745	40593121	40595365
contig_6449	chr-2	+	3652	515	2874	74586745	40593121	40595365
contig_7077	chr-2	-	7544	4375	6704	74586745	40593121	40595365
contig_5767	chr-2	+	45826	16728	18339	74586745	40593837	40595365
contig_20211	chr-2	-	45561	2218	16096	74586745	6990295	47623853
contig_1668	chr-2	+	65595	20611	53704	74586745	33104145	46468982
contig_20352	chr-2	+	35293	22610	25799	74586745	35087894	45632631
contig_3450	chr-2	+	140934	118637	130608	74586745	13076949	73642672
contig_2189	chr-2	+	32298	8995	30738	74586745	33104145	56720068
contig_21161	chr-2	+	237508	70960	118496	74586745	4306118	49191908
contig_13077	chr-2	+	11582	1	2435	74586745	38286359	46661782
contig_1539	chr-2	-	592719	51352	526457	74586745	39946359	47623853
contig_23456	chr-2	+	121084	27248	49720	74586745	33706094	44349171
contig_24677	chr-2	+	31591	622	3462	74586745	38286274	46661867
contig_22661	chr-2	-	5868	1733	3449	74586745	40960472	40961609
contig_11189	chr-2	-	9017	1814	5587	74586745	41016664	41020437
contig_16672	chr-2	+	18434	14867	17634	74586745	7370584	65627130
contig_2504	chr-2	-	174808	119461	136888	74586745	6688718	69111686
contig_13552	chr-2	+	488913	39035	177882	74586745	686653	67854394
contig_5448	chr-2	+	65289	19294	32956	74586745	20095639	67854318
contig_3046	chr-2	+	565032	47518	399712	74586745	35020020	71408446
contig_24109	chr-2	-	18046	12667	14085	74586745	30240002	60281705
contig_24610	chr-2	-	62733	1488	25202	74586745	26641786	54924737
contig_3658	chr-2	+	219343	53846	67384	74586745	41414468	41427568
contig_1054	chr-2	-	425931	107758	387020	74586745	31901298	66551093
contig_8398	chr-2	+	42430	14694	19665	74586745	41546136	41551544
contig_22777	chr-2	-	204562	5863	114444	74586745	14355108	50915422
contig_14001	chr-2	-	221714	82480	207433	74586745	21777250	42183286
contig_21520	chr-2	-	32741	19260	22203	74586745	41702426	41705435
contig_4372	chr-2	-	5692	3008	3681	74586745	41743256	41743925
contig_1501	chr-2	+	1405095	239497	1393599	74586745	513048	71254945
contig_5208	chr-2	+	50843	5318	48196	74586745	686485	67854471
contig_1502	chr-2	+	17958	11424	15509	74586745	33391069	51321578
contig_6940	chr-2	+	219087	118958	176478	74586745	21140368	65268740
contig_7453	chr-2	-	131832	125319	129388	74586745	33391069	51321578
contig_18648	chr-2	+	25376	43	23014	74586745	4866465	69229211
contig_13999	chr-2	-	6451	1997	3406	74586745	42181864	42183286
contig_14000	chr-2	-	5956	3606	4987	74586745	42181864	42183286
contig_10307	chr-2	-	31818	6471	8468	74586745	15989802	68612881
contig_4949	chr-2	-	131467	44731	62272	74586745	4877020	66849259
contig_15698	chr-2	-	17271	1222	6294	74586745	42405147	42410354
contig_9259	chr-2	-	25818	18466	24107	74586745	42405147	42410486
contig_140	chr-2	-	12313	6879	9761	74586745	42407465	42410354
contig_3267	chr-2	-	13320	7346	10264	74586745	42407465	42410354
contig_18967	chr-2	-	80997	30277	31908	74586745	38286274	46661867
contig_8854	chr-2	-	15459	16	1648	74586745	38286274	46661867
contig_10669	chr-2	-	15814	19	1653	74586745	38286274	46661867
contig_22398	chr-2	-	10376	24	1662	74586745	38286274	46661867
contig_1347	chr-2	-	38927	1038	2688	74586745	38286274	46661867
contig_15363	chr-2	-	2618	18	1730	74586745	38286274	46661867
contig_22576	chr-2	-	24801	15334	17052	74586745	38286274	46661867
contig_4899	chr-2	-	28977	18834	20757	74586745	38286602	46661538
contig_5023	chr-2	-	13491	5489	7360	74586745	38286274	46661867
contig_21262	chr-2	-	17264	7762	10984	74586745	38286265	46661876
contig_15129	chr-2	-	29737	20971	24363	74586745	38286265	46661876
contig_23060	chr-2	-	12318	18	737	74586745	38286274	46661867
contig_4083	chr-2	+	104131	30081	30800	74586745	38286274	46661867
contig_22067	chr-2	-	43770	35049	35767	74586745	38286274	46661867
contig_11077	chr-2	-	10309	17	728	74586745	38286274	46661867
contig_12490	chr-2	-	25914	20198	20906	74586745	38286274	46661867
contig_23454	chr-2	+	181162	56	52975	74586745	29114431	66960324
contig_2505	chr-2	+	328321	23832	283380	74586745	6688718	69111686
contig_1865	chr-2	-	255825	10657	192217	74586745	38286321	46661835
contig_22188	chr-2	+	319788	47165	229490	74586745	29224244	65268626
contig_19170	chr-2	+	58295	34892	51220	74586745	38286321	65269692
contig_16302	chr-2	+	28871	11217	19123	74586745	43373045	43380944
contig_23351	chr-2	+	152728	7608	131182	74586745	8838105	45696520
contig_20122	chr-2	+	17769	16858	17760	74586745	24291042	65267834
contig_17221	chr-2	-	9490	5341	6663	74586745	37101451	49506401
contig_17220	chr-2	-	8217	3134	4302	74586745	37101451	49506246
contig_21338	chr-2	+	233303	53167	168159	74586745	43116664	53898364
contig_5836	chr-2	-	10630	4	2225	74586745	23367432	68877434
contig_9808	chr-2	-	279543	99270	175813	74586745	39500414	50461954
contig_17590	chr-2	+	215676	67285	190766	74586745	40764771	65824471
contig_10434	chr-2	+	24138	15584	24084	74586745	24998983	65626629
contig_1738	chr-2	+	206010	37586	79412	74586745	44285209	44331898
contig_18933	chr-2	-	22582	407	2466	74586745	23367432	65735150
contig_8625	chr-2	+	12436	4644	5818	74586745	44346525	44347728
contig_12786	chr-2	+	42898	33341	36099	74586745	44346195	44348836
contig_12823	chr-2	+	46574	34829	37346	74586745	44346913	44349220
contig_23446	chr-2	+	81348	516	67796	74586745	23367432	68877611
contig_4768	chr-2	-	242722	101338	242713	74586745	23658939	65627130
contig_12423	chr-2	+	18334	2039	4945	74586745	39217285	49960493
contig_21132	chr-2	-	317444	45465	235481	74586745	42113856	50754139
contig_2231	chr-2	+	74145	28800	63587	74586745	16463600	65627152
contig_2963	chr-2	+	78978	44410	59110	74586745	23367432	68877611
contig_18702	chr-2	-	10124	2652	4881	74586745	23367432	68877531
contig_3441	chr-2	-	25178	19978	22348	74586745	44966357	44968752
contig_11066	chr-2	-	78731	12070	75337	74586745	6549202	66960095
contig_15770	chr-2	+	548621	47144	543246	74586745	14508604	69263116
contig_8998	chr-2	-	11194	325	1665	74586745	39012529	50304254
contig_1094	chr-2	-	227114	42645	142469	74586745	21290488	56784974
contig_10151	chr-2	-	168597	10061	167417	74586745	14056852	45537143
contig_1181	chr-2	+	79646	70693	75520	74586745	29114604	65626629
contig_22044	chr-2	-	13267	409	2763	74586745	39218117	49960992
contig_12229	chr-2	+	34191	5159	8542	74586745	45178102	45182866
contig_17881	chr-2	+	10138	2195	4089	74586745	45181393	45183420
contig_2362	chr-2	-	108325	46680	49830	74586745	27341542	57421487
contig_6743	chr-2	+	125242	104196	119200	74586745	24290989	45720105
contig_3448	chr-2	+	75868	10	29109	74586745	33222028	63117491
contig_12489	chr-2	-	15151	12402	14074	74586745	23367990	68877033
contig_7138	chr-2	+	97803	13971	97025	74586745	36904259	59857630
contig_8011	chr-2	+	7455	19	1365	74586745	23367432	68877611
scaffold_21715	chr-2	-	140946	6803	44035	74586745	45243265	48566000
contig_2422	chr-2	+	176184	29	28386	74586745	29114604	65627130
contig_1895	chr-2	+	321485	22147	264473	74586745	11043961	57930094
contig_23516	chr-2	+	57582	26818	36876	74586745	38197749	53898364
contig_21647	chr-2	+	10055	2669	3446	74586745	45555199	45555968
contig_2955	chr-2	+	166616	57011	141780	74586745	17045349	73529750
contig_18045	chr-2	-	16719	4812	6993	74586745	23367432	68877611
contig_16854	chr-2	+	39090	24786	27039	74586745	23367432	68877611
contig_16384	chr-2	+	12158	5078	11693	74586745	37788004	59488267
contig_12228	chr-2	+	269734	81172	222473	74586745	38703976	67038654
contig_3281	chr-2	+	8891	38	4958	74586745	29114604	65626629
contig_14383	chr-2	+	42486	34395	37425	74586745	45997113	46000381
contig_9323	chr-2	-	5138	3206	5097	74586745	23367468	68877611
contig_10776	chr-2	-	14301	8080	9972	74586745	23367718	68877361
contig_7937	chr-2	-	5113	2874	5080	74586745	23367468	68877611
contig_3669	chr-2	-	43948	11388	13595	74586745	23367468	68877611
contig_17167	chr-2	+	71102	19972	22487	74586745	44346990	48247850
contig_9695	chr-2	-	8744	6510	7521	74586745	23369047	68876054
contig_15773	chr-2	-	8866	6186	8694	74586745	46222061	46224563
contig_21859	chr-2	+	9254	6596	9086	74586745	46222061	46224563
scaffold_23262	chr-2	-	330332	7696	242612	74586745	29661252	66436870
contig_12822	chr-2	-	31530	3169	5517	74586745	44346913	48247934
contig_5199	chr-2	+	476574	48135	352600	74586745	6358534	65268820
contig_1435	chr-2	+	346103	54	4763	74586745	29114604	65626974
contig_7673	chr-2	+	55882	36110	40408	74586745	46462789	46466426
contig_395	chr-2	+	43945	46	6739	74586745	46462778	46469139
contig_21074	chr-2	-	6429	61	6415	74586745	46462778	46469139
contig_22826	chr-2	-	47793	37182	40489	74586745	46519800	46523862
contig_24616	chr-2	-	310692	105597	267326	74586745	46494081	46681701
contig_23358	chr-2	+	133415	5799	101138	74586745	16768089	62349196
contig_15305	chr-2	-	11995	6158	8938	74586745	46658695	46661867
contig_8476	chr-2	+	10084	6565	8234	74586745	46660129	46661867
contig_22065	chr-2	-	24247	22209	22928	74586745	46661150	46661867
contig_8902	chr-2	+	13804	22	1628	74586745	39893323	51687965
contig_1056	chr-2	+	110407	76875	81939	74586745	29114604	65627130
scaffold_24494	chr-2	+	341488	262677	267696	74586745	29114604	65627130
contig_13695	chr-2	-	19220	17493	19220	74586745	23310593	70721488
contig_6476	chr-2	-	371971	122878	237920	74586745	21290488	56361505
contig_535	chr-2	-	216938	59630	192015	74586745	31901298	67466537
contig_10528	chr-2	-	128952	103530	128922	74586745	29114579	65627130
contig_11611	chr-2	+	12558	2773	3784	74586745	47259665	47262222
contig_2694	chr-2	+	190599	45898	190577	74586745	29114604	72797074
contig_21100	chr-2	+	5003	883	1566	74586745	47431507	47432160
contig_983	chr-2	+	82072	8104	80954	74586745	29114604	65627130
contig_13123	chr-2	+	11844	2057	4291	74586745	23367587	68877644
contig_21884	chr-2	-	11399	7615	9170	74586745	46042529	49077022
contig_15416	chr-2	+	3190	9	3107	74586745	29116077	65625758
contig_21885	chr-2	-	11435	3597	5083	74586745	46042529	49077022
contig_2161	chr-2	-	92152	14679	17525	74586745	37181239	57945784
contig_21036	chr-2	+	15794	12709	14949	74586745	19184800	64186869
contig_10680	chr-2	-	22004	17389	21975	74586745	41683791	61345119
contig_19248	chr-2	-	329004	63834	307077	74586745	47431507	47698257
contig_3252	chr-2	+	83092	9221	28372	74586745	47329830	61701677
contig_2046	chr-2	-	38231	7307	9542	74586745	38776251	57397361
contig_21083	chr-2	-	10647	837	2989	74586745	29099179	68379142
contig_12956	chr-2	-	8125	7	1917	74586745	48305702	48308084
contig_2044	chr-2	+	76896	10525	56462	74586745	37788430	63572931
contig_1038	chr-2	+	88213	4472	27872	74586745	39211163	54470090
contig_19180	chr-2	+	15364	11775	15304	74586745	26861582	66960324
contig_16073	chr-2	-	513534	27700	481813	74586745	22489656	49256812
contig_17403	chr-2	+	167772	93227	140657	74586745	37788412	55629129
contig_24626	chr-2	+	27807	25109	27648	74586745	46222061	52007722
contig_20771	chr-2	+	97118	36251	38380	74586745	46222070	52007711
contig_13024	chr-2	-	13820	171	2788	74586745	46222061	52007711
contig_13728	chr-2	-	2785	159	2784	74586745	46222061	52007711
contig_8679	chr-2	-	9566	164	2798	74586745	46222061	52007722
contig_8396	chr-2	+	18918	15283	17908	74586745	46222061	52007727
contig_19702	chr-2	+	26424	19859	22498	74586745	46222061	52007727
contig_19849	chr-2	-	8803	2208	4847	74586745	46222061	52007727
contig_18629	chr-2	-	7444	4807	7443	74586745	46222061	52007727
contig_2661	chr-2	+	29867	10229	12867	74586745	46222061	52007727
contig_3491	chr-2	-	71752	16165	45550	74586745	42739212	50461954
contig_23545	chr-2	-	105080	2955	7499	74586745	29115607	65627130
contig_18909	chr-2	-	18779	15975	18622	74586745	46222061	52007727
contig_11347	chr-2	+	7299	4	2414	74586745	46222070	52007866
contig_13625	chr-2	+	11511	8534	10939	74586745	46222070	52007866
contig_1674	chr-2	-	19411	15604	19399	74586745	29114604	65627130
contig_2298	chr-2	+	132988	11	35981	74586745	35528832	69111686
contig_19023	chr-2	+	35078	14065	16290	74586745	49335601	49338025
contig_1045	chr-2	+	211429	130143	206621	74586745	31901298	74414684
contig_1102	chr-2	+	188325	52361	173399	74586745	37095073	64272570
contig_9489	chr-2	-	84747	22017	84016	74586745	19184800	64186869
contig_3048	chr-2	+	240698	192211	228642	74586745	26852759	65268820
contig_21671	chr-2	+	3197	162	1465	74586745	49803434	49804679
contig_2686	chr-2	+	291605	53046	162740	74586745	28779199	55686759
contig_22131	chr-2	-	70490	9388	14646	74586745	49969137	49975341
contig_8309	chr-2	+	14735	460	3142	74586745	19184800	64186869
contig_10652	chr-2	+	32636	21816	22767	74586745	24290994	65267950
contig_5019	chr-2	+	16935	7881	16847	74586745	46060076	54470090
contig_16733	chr-2	+	39532	4746	35132	74586745	50195376	50197446
contig_5413	chr-2	+	135337	15272	96562	74586745	39012663	70866068
contig_23430	chr-2	+	378090	192389	306821	74586745	50229568	50483252
contig_2309	chr-2	+	290184	38683	166378	74586745	31871994	71697833
scaffold_24242	chr-2	+	108729	14452	96845	74586745	43911214	65268705
contig_15886	chr-2	+	28357	10056	11199	74586745	50302956	50304076
contig_2622	chr-2	-	29643	27707	29485	74586745	50303135	50304909
contig_9092	chr-2	+	19760	6517	12193	74586745	40474906	65268820
contig_17141	chr-2	-	6217	116	4122	74586745	35528832	69111686
contig_13350	chr-2	+	37880	7934	11944	74586745	35528832	69111686
contig_3052	chr-2	-	69737	55068	59079	74586745	35528832	69111686
contig_2557	chr-2	-	45066	29105	32510	74586745	46519832	54924704
contig_11847	chr-2	-	64045	56638	60086	74586745	46519800	54924737
contig_16635	chr-2	-	26208	42	2869	74586745	46520406	54924129
contig_12878	chr-2	+	47002	14472	19250	74586745	35529954	69110938
contig_2135	chr-2	-	165263	155223	159157	74586745	35528832	69111628
contig_12294	chr-2	+	10403	1047	5691	74586745	41979699	61345119
contig_20107	chr-2	+	8858	6070	8856	74586745	46222061	68283904
contig_19763	chr-2	+	16589	6689	8617	74586745	50999039	51000855
contig_6933	chr-2	+	160600	129674	134167	74586745	37095127	64272570
contig_2139	chr-2	-	69185	46609	48508	74586745	51226127	51228315
contig_14065	chr-2	+	75383	1061	1902	74586745	51227193	51228043
contig_13754	chr-2	-	15664	789	4123	74586745	46519800	54924737
contig_8674	chr-2	+	3379	43	945	74586745	51451279	51452193
contig_4757	chr-2	+	633662	313116	343560	74586745	35528832	69111686
contig_12617	chr-2	-	4195	640	3287	74586745	44021885	62599168
contig_16407	chr-2	-	18933	11847	14777	74586745	46222518	71697833
contig_18152	chr-2	+	27952	6135	8788	74586745	35358135	66855227
scaffold_23370	chr-2	+	1230426	14616	1218942	74586745	18292366	61271751
contig_21053	chr-2	+	7755	3790	6036	74586745	14508595	74309829
contig_23508	chr-2	+	73995	10982	73989	74586745	6358534	66660732
contig_2599	chr-2	-	153566	22564	153436	74586745	40474906	62199131
contig_19455	chr-2	+	187394	18903	175447	74586745	21374822	66660732
contig_18839	chr-2	+	4397	524	2822	74586745	52005519	52007835
contig_21919	chr-2	+	3758	1	2366	74586745	52005519	52007866
contig_20512	chr-2	-	6844	4396	6843	74586745	52005519	52007866
contig_11867	chr-2	+	7384	2236	4839	74586745	52024855	52027719
contig_17960	chr-2	-	13372	95	2478	74586745	52025061	52027687
contig_9981	chr-2	-	62118	2180	28378	74586745	38656492	68333004
contig_21407	chr-2	-	11509	2757	10788	74586745	19184800	69263116
contig_5467	chr-2	+	7526	340	1554	74586745	52105883	52107041
scaffold_21702	chr-2	-	353135	349207	352913	74586745	41684309	61344791
contig_3020	chr-2	-	90786	27101	31369	74586745	35656477	66660411
contig_5135	chr-2	-	4517	1637	4224	74586745	23367468	68877611
contig_7477	chr-2	-	263342	76024	251428	74586745	24281780	65280218
contig_14813	chr-2	+	17605	12675	14638	74586745	46222526	71697833
contig_9352	chr-2	+	18071	4622	7021	74586745	46222526	71697833
contig_18434	chr-2	+	4031	2155	4031	74586745	46222526	71697833
contig_17262	chr-2	-	440112	663	330723	74586745	8580021	62998790
contig_11233	chr-2	-	22637	14457	17713	74586745	35529954	69111043
contig_15222	chr-2	+	43228	20302	37050	74586745	53542796	53559428
contig_23306	chr-2	+	126294	65198	115730	74586745	47161905	59947460
contig_17369	chr-2	-	4331	2079	3912	74586745	53576730	53578489
contig_5756	chr-2	-	15983	4080	8115	74586745	35529954	69111686
contig_11016	chr-2	+	284126	14023	229314	74586745	32972566	65035717
contig_4970	chr-2	-	10997	1820	5818	74586745	35529954	69111686
contig_15845	chr-2	+	33731	27585	30075	74586745	53895100	53897590
contig_21778	chr-2	+	15166	5818	8369	74586745	53895100	53897621
contig_16105	chr-2	+	107004	42726	45998	74586745	53895100	53898352
contig_10564	chr-2	+	26014	4985	8131	74586745	53895100	53898364
contig_12651	chr-2	+	12315	2022	5338	74586745	53895100	53898364
contig_15409	chr-2	+	14210	8439	11980	74586745	53895100	53898364
contig_16957	chr-2	+	6989	12	3316	74586745	53895100	53898364
contig_20336	chr-2	-	6779	514	3674	74586745	53895100	53898364
contig_20614	chr-2	-	11019	7212	10371	74586745	53895100	53898364
contig_6952	chr-2	+	24958	3712	7011	74586745	53895100	53898364
contig_7904	chr-2	+	71575	57303	60470	74586745	53895100	53898364
contig_17723	chr-2	-	9497	6038	9237	74586745	53895174	53898364
contig_24047	chr-2	+	127637	40904	56781	74586745	53912152	53927382
contig_13148	chr-2	+	85668	4044	75481	74586745	45627202	62267147
contig_16925	chr-2	+	379723	35523	301479	74586745	14968285	54979084
contig_3564	chr-2	+	110419	39873	43262	74586745	49241145	66436870
contig_12945	chr-2	+	15111	485	15102	74586745	6549142	63966005
contig_2765	chr-2	+	122655	14250	64251	74586745	4876989	66660732
contig_7760	chr-2	+	4861	1108	4507	74586745	49241081	66436870
contig_23550	chr-2	-	75738	51078	58901	74586745	41546136	70809563
contig_18262	chr-2	+	14924	7485	11209	74586745	49240808	66436870
contig_9723	chr-2	+	227256	117287	121000	74586745	49240814	66436870
contig_23861	chr-2	+	75190	47734	51454	74586745	49240814	66436870
contig_14459	chr-2	+	26950	22682	26384	74586745	49240820	66436870
contig_17133	chr-2	+	44539	40381	44091	74586745	49240820	66436870
contig_3055	chr-2	+	180325	1839	102348	74586745	16768089	69263072
scaffold_885	chr-2	-	301929	96459	173780	74586745	47550996	56343676
contig_19597	chr-2	+	22445	8102	8951	74586745	54570211	54571133
contig_1175	chr-2	+	184229	63565	65858	74586745	54712024	54766533
contig_20091	chr-2	-	3665	127	3449	74586745	54920743	54924752
contig_17367	chr-2	-	6365	3729	6348	74586745	55221533	55224227
contig_3447	chr-2	-	23581	10406	12732	74586745	55245259	55247632
contig_5022	chr-2	-	73802	17691	20352	74586745	55245259	55248016
contig_23753	chr-2	+	17514	13903	16277	74586745	55321664	55324099
contig_11738	chr-2	+	16548	4656	9353	74586745	45354004	67624101
contig_23408	chr-2	-	12857	4057	12767	74586745	45239763	56343676
contig_3649	chr-2	+	172086	15317	71860	74586745	15824155	62200926
contig_1	chr-2	-	372431	112779	372431	74586745	37096144	64271693
contig_16227	chr-2	+	4962	3853	4858	74586745	56258430	56259439
contig_4504	chr-2	+	14282	1390	14184	74586745	50733189	72797309
contig_18994	chr-2	+	184008	59114	92252	74586745	39998751	69263116
contig_1687	chr-2	-	138113	134254	137498	74586745	56300997	56343676
contig_2833	chr-2	-	28006	24186	27917	74586745	56300881	56343676
contig_2834	chr-2	+	41852	16493	20230	74586745	56301006	56343676
contig_888	chr-2	-	16380	12484	16282	74586745	56300997	56343699
contig_2406	chr-2	-	34053	23823	27860	74586745	56301161	56343676
contig_23593	chr-2	+	67795	14624	63846	74586745	48804449	68613787
contig_2513	chr-2	-	32453	18173	22796	74586745	56715473	56720068
contig_2246	chr-2	-	41443	17843	20741	74586745	39474538	67027957
contig_21708	chr-2	-	29776	121	4087	74586745	46222061	71699043
contig_2846	chr-2	-	68028	40481	43083	74586745	49240820	66437053
contig_21667	chr-2	-	6617	5374	6615	74586745	57420256	57421480
contig_11382	chr-2	-	32971	18662	19872	74586745	57420256	57421487
contig_19294	chr-2	-	30738	29480	30734	74586745	57420256	57421487
contig_17557	chr-2	+	20528	11512	13134	74586745	24290983	65268740
contig_23402	chr-2	-	29853	7801	9220	74586745	58206008	58207446
contig_13927	chr-2	-	11709	2723	5691	74586745	45291198	74400888
contig_20495	chr-2	+	20074	11981	13608	74586745	24290983	65268700
contig_7976	chr-2	+	20789	9759	11373	74586745	24290983	65268705
contig_14332	chr-2	-	91635	8226	83559	74586745	54920644	68657114
contig_5075	chr-2	+	15497	3536	5148	74586745	24290983	65268705
contig_11014	chr-2	+	62865	12323	27521	74586745	54067080	70138228
contig_12896	chr-2	+	7133	5538	7124	74586745	24291007	65268705
contig_13143	chr-2	+	16946	14915	16604	74586745	24290983	65268834
contig_20259	chr-2	+	6596	3988	5533	74586745	24290983	65268705
contig_11616	chr-2	+	3391	1768	3309	74586745	24290983	65268705
contig_13286	chr-2	-	647635	32244	572390	74586745	58842119	59616381
contig_1240	chr-2	+	48300	14706	17085	74586745	24291038	65267838
contig_12509	chr-2	+	49828	1867	3940	74586745	59943323	59945408
contig_15792	chr-2	-	4980	584	4432	74586745	59943323	59947460
contig_13436	chr-2	+	93293	25950	28481	74586745	59944412	59947460
contig_14587	chr-2	-	5143	82	1610	74586745	52005601	71697833
contig_7064	chr-2	+	2358	1	2353	74586745	52005519	71697833
contig_4793	chr-2	+	6755	1	2350	74586745	52005519	71697833
contig_4769	chr-2	+	5418	1	2354	74586745	52005519	71697833
contig_19358	chr-2	+	5243	1	2397	74586745	52005519	71697833
contig_3009	chr-2	-	71799	52496	54362	74586745	53934718	66436870
contig_8163	chr-2	-	30087	4830	7244	74586745	52005519	71697833
contig_11820	chr-2	-	15647	9740	11568	74586745	60645361	60647171
contig_23398	chr-2	+	144826	13671	131990	74586745	44346550	61784738
contig_1485	chr-2	+	42743	6226	35972	74586745	39211648	73789822
contig_2567	chr-2	+	93442	4547	93417	74586745	46660129	64264048
contig_8157	chr-2	+	110518	29386	91201	74586745	52005519	71697833
contig_17852	chr-2	+	20500	18841	20444	74586745	61270335	61271900
contig_24346	chr-2	+	20981	8962	12592	74586745	61223845	61397542
contig_12479	chr-2	+	13258	6568	8748	74586745	61352413	61354588
contig_12561	chr-2	+	49573	20085	21593	74586745	61352413	61354588
contig_12719	chr-2	+	55000	31364	34958	74586745	61697941	61784886
contig_8826	chr-2	+	102214	45136	48604	74586745	61697883	61784772
contig_1492	chr-2	+	588632	169225	482504	74586745	21140921	64289380
contig_15762	chr-2	-	7769	1936	3647	74586745	61270277	62347964
contig_20043	chr-2	-	12628	5734	7389	74586745	61270277	62347964
contig_6280	chr-2	-	5400	1930	3598	74586745	61270277	62347964
contig_3292	chr-2	-	7697	1919	3589	74586745	61270277	62347964
contig_6505	chr-2	-	94326	2996	44123	74586745	34052959	64847177
contig_23521	chr-2	-	138789	39415	138052	74586745	54920644	64289380
contig_16132	chr-2	+	8670	5362	8033	74586745	62346363	62349219
contig_1812	chr-2	-	57212	35785	37656	74586745	62347237	62349219
contig_8139	chr-2	-	38505	23859	30349	74586745	62533833	62541479
contig_19046	chr-2	-	6782	878	3809	74586745	52151019	73043693
contig_4520	chr-2	+	426524	204046	227780	74586745	56779574	69085837
contig_24187	chr-2	-	15937	710	3519	74586745	63027289	63063967
contig_11901	chr-2	-	36119	2901	4957	74586745	63027921	63063967
contig_2376	chr-2	+	94126	72460	79476	74586745	56780385	69085787
contig_2229	chr-2	+	451651	104877	410514	74586745	63400721	73529750
contig_13402	chr-2	-	13588	3968	6059	74586745	64075982	64186869
contig_2787	chr-2	+	122307	34013	109676	74586745	64260701	64262001
contig_23477	chr-2	-	35081	10000	18407	74586745	64400217	64407481
contig_902	chr-2	-	175330	1432	124877	74586745	61691832	69317807
contig_6392	chr-2	+	19313	6576	11348	74586745	63571056	65268820
contig_3986	chr-2	+	213923	78558	104543	74586745	61691832	72797222
contig_15182	chr-2	+	17284	2787	15220	74586745	51043149	67466548
contig_23102	chr-2	-	12991	6335	6997	74586745	65033165	65033850
contig_8951	chr-2	-	50896	31817	32410	74586745	65033165	65033850
contig_17135	chr-2	-	4963	25	900	74586745	65034929	65035728
contig_24529	chr-2	-	23613	5234	6471	74586745	65034073	65268740
contig_9091	chr-2	-	14298	5067	6384	74586745	65034061	65268820
contig_18597	chr-2	-	14558	1301	2560	74586745	65034141	65268740
contig_20996	chr-2	-	17817	8763	10377	74586745	65034080	65268701
contig_21328	chr-2	-	65254	21964	23522	74586745	65034047	65268834
contig_21450	chr-2	+	8580	6202	7796	74586745	65034047	65268834
contig_10701	chr-2	-	10422	7640	9249	74586745	65034061	65268820
contig_10282	chr-2	+	5868	1536	3078	74586745	65034130	65268740
contig_22215	chr-2	-	74239	22840	24454	74586745	65034061	65268820
contig_16261	chr-2	-	18826	340	1509	74586745	65034736	65268162
contig_17749	chr-2	+	5440	3746	5369	74586745	65034061	65268820
contig_4437	chr-2	+	26075	8493	24818	74586745	46660129	70138737
contig_20132	chr-2	-	8985	4652	6269	74586745	65267064	65268834
contig_7631	chr-2	-	64583	4413	5483	74586745	56706861	74394088
contig_1124	chr-2	-	1131045	16951	1117895	74586745	34607295	72014694
contig_18640	chr-2	+	724488	244282	541668	74586745	14869016	69229211
contig_10133	chr-2	+	67901	39505	42414	74586745	66548180	66551093
contig_2293	chr-2	+	50999	7562	12218	74586745	63893805	68275708
contig_510	chr-2	-	84879	14846	47742	74586745	66674347	66677845
contig_14779	chr-2	-	22047	11061	14790	74586745	66675149	66678461
contig_952	chr-2	+	55632	17276	29687	74586745	65034061	68612947
contig_8043	chr-2	-	35409	8741	25136	74586745	60566192	68455861
contig_1935	chr-2	-	6494	127	3258	74586745	63894796	68275708
contig_23245	chr-2	-	13206	9692	13199	74586745	66956595	66960324
contig_15657	chr-2	+	41399	26665	27815	74586745	67037454	67038654
contig_3257	chr-2	+	390092	18	339942	74586745	66655371	69111686
contig_2914	chr-2	-	195878	20710	195786	74586745	56300994	68518469
contig_3322	chr-2	-	228225	125341	130256	74586745	67460482	67466548
contig_23145	chr-2	+	27748	17869	20255	74586745	67583990	67586893
contig_18671	chr-2	+	395982	60021	344836	74586745	39745189	70625297
contig_18647	chr-2	+	14663	2458	8042	74586745	65034061	69226870
contig_2352	chr-2	+	151253	98782	103666	74586745	68411893	68416864
contig_1634	chr-2	+	335965	154893	214904	74586745	66656059	69111552
contig_17481	chr-2	-	40875	5230	7782	74586745	68611435	68613975
contig_7873	chr-2	+	611364	151460	446484	74586745	18462211	72514435
contig_5077	chr-2	+	6853	14	3273	74586745	69260211	69263116
contig_23923	chr-2	+	61681	1929	39322	74586745	63570978	70712205
contig_6317	chr-2	-	12895	1518	3475	74586745	70473654	70475566
contig_20223	chr-2	+	44383	18555	20082	74586745	71696143	71697833
contig_18977	chr-2	-	9020	4175	6442	74586745	73361402	73525784
contig_10428	chr-2	-	60661	56295	58846	74586745	73527037	73529691
contig_1879	chr-2	+	77998	73575	76159	74586745	73527037	73529691
contig_1026	chr-2	-	14247	9351	10911	74586745	73528138	73529750
contig_6904	chr-2	-	159127	3931	121291	74586745	73638858	73649381
contig_18080	chr-3	-	49238	30202	34544	70017893	528337	532776
contig_18082	chr-3	-	41106	28667	33010	70017893	528337	532776
contig_20685	chr-3	-	8875	2858	7004	70017893	528353	532766
contig_11659	chr-3	+	17160	9041	12138	70017893	528353	532776
contig_13444	chr-3	-	29748	4697	9108	70017893	528359	532780
contig_2561	chr-3	+	18796	178	1640	70017893	546817	548325
contig_1418	chr-3	-	92808	46841	72326	70017893	528337	11422634
contig_6520	chr-3	+	42322	6205	8059	70017893	1049545	1051513
contig_23479	chr-3	+	168101	80170	97172	70017893	844586	35672199
contig_1010	chr-3	-	43130	21393	38571	70017893	528347	5894360
contig_15234	chr-3	+	16496	4811	6575	70017893	1450478	1452182
contig_14609	chr-3	+	8966	2904	4381	70017893	1450937	1452402
contig_2820	chr-3	-	166829	114158	117537	70017893	1450478	1454095
contig_13863	chr-3	-	19814	9020	12412	70017893	1450478	1454104
contig_19635	chr-3	+	22886	993	4385	70017893	1450478	1454104
contig_19905	chr-3	-	12681	6017	9413	70017893	1450478	1454104
contig_24208	chr-3	-	21967	1200	4729	70017893	1450479	1454215
contig_8594	chr-3	+	31036	28273	30626	70017893	1733914	1736012
contig_13202	chr-3	-	6683	2274	4666	70017893	1734087	1736280
contig_21144	chr-3	-	30882	10092	12555	70017893	1734087	1736280
contig_24192	chr-3	+	30882	6759	9259	70017893	1734087	1736280
contig_1053	chr-3	-	21153	12973	15324	70017893	1734235	1736280
contig_8849	chr-3	+	94405	8265	14314	70017893	1736334	1742056
contig_17554	chr-3	-	186304	120331	133666	70017893	1792800	1807233
contig_16437	chr-3	+	224652	19267	222342	70017893	479156	61722322
contig_2933	chr-3	+	45439	6607	9704	70017893	1523325	3872466
contig_19727	chr-3	+	21374	13633	16728	70017893	1523325	3872512
contig_19936	chr-3	-	8469	6964	8449	70017893	2605991	2607523
contig_23095	chr-3	-	14271	43	8563	70017893	2689679	2696741
contig_23365	chr-3	-	74547	24172	27171	70017893	1523431	3872812
contig_8851	chr-3	+	15572	1185	7195	70017893	1736334	24849735
contig_4940	chr-3	+	59228	20433	22910	70017893	3987588	3990050
contig_15887	chr-3	-	29533	22810	23127	70017893	3047355	5369281
contig_11610	chr-3	+	6900	1746	2798	70017893	3046273	5370370
contig_24329	chr-3	-	10365	5621	7111	70017893	698684	8003419
contig_19651	chr-3	+	6316	158	1832	70017893	698680	8003419
contig_23410	chr-3	-	151328	4649	8249	70017893	4781252	4784520
contig_11830	chr-3	-	40482	26194	35515	70017893	1450478	16503154
contig_3497	chr-3	-	181786	30133	143850	70017893	545388	11422634
contig_11056	chr-3	+	19002	10043	11758	70017893	4999424	5001655
contig_22623	chr-3	+	23931	22017	23734	70017893	5036480	5038258
contig_7263	chr-3	+	230387	58468	73098	70017893	5172880	5186874
contig_8636	chr-3	-	73515	12833	40963	70017893	528353	63249198
contig_13874	chr-3	+	144363	12432	126239	70017893	5905747	6088208
contig_17830	chr-3	-	39017	3110	4061	70017893	6259802	6260568
contig_5961	chr-3	+	53896	25655	26735	70017893	6259802	6260967
contig_2894	chr-3	-	184498	67579	93446	70017893	528347	17604623
contig_22105	chr-3	+	17623	391	7964	70017893	203942	18818458
contig_7722	chr-3	-	26352	369	9737	70017893	4552523	32358512
contig_21094	chr-3	-	31928	4608	7845	70017893	7197786	7200529
contig_3482	chr-3	+	77005	58224	62744	70017893	7197896	7201683
contig_5346	chr-3	-	356370	284594	288906	70017893	7197961	7201848
contig_22800	chr-3	+	15553	13325	15299	70017893	7200310	7201848
contig_16667	chr-3	+	5758	4005	5651	70017893	6259802	8003419
contig_3154	chr-3	-	138539	47275	96657	70017893	1450505	14020815
contig_13592	chr-3	-	192303	113912	178932	70017893	7190558	31156681
contig_15606	chr-3	-	25445	12090	13330	70017893	7279140	8417563
contig_936	chr-3	+	54903	9181	14989	70017893	8191402	8196589
contig_8450	chr-3	+	121409	25403	67196	70017893	2511769	14705581
contig_8451	chr-3	+	143636	29583	71500	70017893	2511769	14705581
contig_3250	chr-3	+	62253	1568	50779	70017893	2675209	70002682
contig_4830	chr-3	+	29420	7513	8791	70017893	8501877	8503075
contig_21357	chr-3	+	17709	13793	17552	70017893	8640815	8644983
contig_1466	chr-3	+	32488	507	19265	70017893	8191402	39777297
contig_1618	chr-3	+	248164	97620	123516	70017893	2675209	15911476
contig_3155	chr-3	-	723462	88738	713147	70017893	2675209	28359043
contig_20656	chr-3	+	90224	86673	90189	70017893	203942	19522613
contig_2613	chr-3	+	620703	348282	522480	70017893	2675212	24515410
contig_4937	chr-3	+	187643	16035	148332	70017893	2676099	18778053
contig_6293	chr-3	+	70625	20347	63296	70017893	2110440	49058913
contig_22345	chr-3	-	73961	25324	45293	70017893	7455735	17146608
contig_12614	chr-3	+	3630	800	3001	70017893	10644281	10646347
contig_4946	chr-3	+	391283	228653	382805	70017893	8776714	12688643
contig_9052	chr-3	+	7683	1728	3711	70017893	10883127	10885047
contig_4409	chr-3	+	842420	21167	779897	70017893	6171642	30251907
contig_21493	chr-3	-	317175	96274	310310	70017893	10497348	34482964
contig_1934	chr-3	-	21441	4729	6944	70017893	11420424	11422634
contig_2033	chr-3	+	50683	40486	42701	70017893	11420424	11422634
contig_2230	chr-3	-	28273	4090	6321	70017893	11420424	11422634
contig_2434	chr-3	+	92962	25791	27998	70017893	11420424	11422634
contig_2735	chr-3	+	22656	12142	14357	70017893	11420424	11422634
contig_912	chr-3	-	42146	9528	11744	70017893	11420424	11422634
contig_2912	chr-3	-	16286	6488	7680	70017893	11421173	11422634
contig_3393	chr-3	-	17460	4314	5506	70017893	11421173	11422634
contig_23495	chr-3	+	100346	96975	98234	70017893	11575973	11577296
contig_18797	chr-3	+	123415	64185	100780	70017893	1734235	21613801
contig_9355	chr-3	-	376292	43459	284752	70017893	8438189	35672207
contig_10388	chr-3	+	205495	62502	66020	70017893	12080998	12084498
contig_21475	chr-3	+	34888	23422	24644	70017893	12434154	12435659
contig_23536	chr-3	+	186650	94418	179957	70017893	5891660	13081400
contig_2631	chr-3	-	203827	3894	196731	70017893	11585096	65576024
contig_8590	chr-3	+	33821	32	21933	70017893	12359063	16503154
contig_9197	chr-3	+	29371	28010	29360	70017893	12756396	12757758
contig_23837	chr-3	+	116634	11369	112578	70017893	528337	41908196
contig_11673	chr-3	-	24966	814	3168	70017893	12836230	12838835
contig_11988	chr-3	-	29306	7670	10426	70017893	13189353	13192247
contig_12173	chr-3	-	310073	28777	289080	70017893	2689679	66404533
contig_6822	chr-3	-	74176	41635	60304	70017893	11645622	17716981
contig_5904	chr-3	-	189510	134862	179619	70017893	5141022	14906399
contig_6597	chr-3	+	216475	157127	190443	70017893	1734087	15911472
contig_23677	chr-3	-	234150	8094	139770	70017893	2675379	30349224
contig_2099	chr-3	+	189398	83951	138266	70017893	12685158	18731246
contig_14402	chr-3	-	14221	11227	11768	70017893	14020254	14020794
contig_2085	chr-3	+	93718	51670	52217	70017893	14020254	14020801
contig_2191	chr-3	+	19758	10659	11186	70017893	14020259	14020801
contig_15517	chr-3	-	32470	5572	6112	70017893	14020267	14020801
contig_2789	chr-3	+	91191	64649	76297	70017893	14020254	14032555
contig_23277	chr-3	-	94393	20574	78165	70017893	1734087	61304069
contig_14291	chr-3	+	36108	29553	33722	70017893	14672823	14676839
contig_17119	chr-3	+	6992	159	4146	70017893	14701330	14705275
contig_16973	chr-3	-	105803	45980	50493	70017893	14701330	14705581
contig_24341	chr-3	+	40242	32087	36350	70017893	14701330	14705581
contig_11413	chr-3	+	42099	13558	21239	70017893	8806903	21454352
contig_6195	chr-3	+	27326	9469	12867	70017893	14903804	14906843
contig_4739	chr-3	-	30751	26878	29408	70017893	14904441	14906763
contig_2473	chr-3	+	121004	29504	116794	70017893	15177103	15237920
contig_6139	chr-3	-	82085	38901	82062	70017893	14837052	17327212
contig_5896	chr-3	+	290794	520	244761	70017893	15240611	51286214
contig_4610	chr-3	+	322932	65292	322575	70017893	6329432	65528928
contig_1237	chr-3	-	143548	37284	142467	70017893	7273447	59333651
contig_13652	chr-3	-	24270	392	3376	70017893	11645617	19649365
contig_18590	chr-3	+	49554	228	3753	70017893	11645622	19649365
contig_2129	chr-3	+	123710	39181	89179	70017893	7197896	45986344
contig_23769	chr-3	-	73641	37285	39959	70017893	11645669	19649112
contig_15838	chr-3	+	63477	6037	57052	70017893	3046228	37051673
contig_24302	chr-3	-	32693	9663	17709	70017893	1450478	30349257
contig_13848	chr-3	-	65779	19570	27583	70017893	1450478	30349257
contig_4331	chr-3	+	185314	32433	128623	70017893	1734087	21012669
contig_16359	chr-3	-	249256	176936	182067	70017893	15905272	15911476
contig_23008	chr-3	-	138460	94831	105124	70017893	15905272	15911476
contig_17331	chr-3	+	18043	9098	13152	70017893	15906428	15911476
contig_23005	chr-3	-	38808	4377	6517	70017893	15908543	15911476
contig_22989	chr-3	-	8498	4344	8493	70017893	15916794	15920966
contig_15261	chr-3	-	6557	1113	3741	70017893	6329024	25324506
contig_10318	chr-3	+	179243	31286	113258	70017893	281978	37616797
contig_4342	chr-3	-	55994	31733	36660	70017893	11402828	20215351
contig_24425	chr-3	-	50137	7990	30999	70017893	14903804	44352688
contig_8619	chr-3	+	273115	5335	273109	70017893	528347	30349261
contig_18971	chr-3	+	9542	660	3101	70017893	6598081	26142944
contig_6101	chr-3	-	4325	534	2686	70017893	16482251	16484412
contig_15072	chr-3	-	7274	2874	5058	70017893	16482251	16484457
contig_15102	chr-3	+	7551	5075	7254	70017893	16482251	16484457
contig_1825	chr-3	+	39599	27413	29453	70017893	16559550	16561885
scaffold_11354	chr-3	-	351639	319250	325217	70017893	282009	37616573
contig_24238	chr-3	+	165316	95236	98621	70017893	281969	37616883
contig_21673	chr-3	+	42046	17659	20271	70017893	11297323	25739541
contig_16080	chr-3	+	56624	39048	41647	70017893	281969	37616821
contig_1846	chr-3	+	141429	44595	102626	70017893	7835471	21279918
contig_2048	chr-3	-	108635	41886	80151	70017893	7197786	63292012
contig_6903	chr-3	+	95336	43375	85893	70017893	6171642	51529535
contig_14852	chr-3	+	4378	433	3744	70017893	11296497	25739992
contig_15638	chr-3	+	8511	4471	7810	70017893	11296406	25739992
contig_5944	chr-3	+	9028	5357	8900	70017893	11296331	25739992
contig_6099	chr-3	-	12358	8368	10025	70017893	17325000	17326705
contig_2313	chr-3	+	213276	50377	141277	70017893	6598081	21280193
contig_23316	chr-3	+	331479	31	293167	70017893	17181414	51219473
contig_1023	chr-3	-	96718	27267	31437	70017893	17600410	17604623
contig_2066	chr-3	+	20568	10885	13124	70017893	17602209	17604406
contig_23713	chr-3	-	236030	11675	223719	70017893	7598573	52369916
contig_10187	chr-3	-	19601	57	11791	70017893	14912490	20024482
contig_15969	chr-3	-	35475	9559	11396	70017893	3350766	32358293
contig_13411	chr-3	+	7468	3873	6518	70017893	11297322	25739843
contig_8025	chr-3	-	18884	13905	16727	70017893	18115081	18117900
contig_22364	chr-3	-	176442	105970	112517	70017893	18401403	18404933
contig_23397	chr-3	+	244801	79818	139712	70017893	18463126	18525373
contig_12606	chr-3	+	207226	28929	187346	70017893	15171939	19204599
contig_827	chr-3	+	125137	450	100032	70017893	5049487	49762133
contig_854	chr-3	-	421597	35684	359768	70017893	15905272	37664676
contig_3201	chr-3	-	25363	11360	18949	70017893	18331953	19633445
contig_7229	chr-3	+	20631	3238	4582	70017893	18875159	18877118
contig_7228	chr-3	+	18001	3197	4851	70017893	18875343	18877358
contig_12699	chr-3	+	326418	233050	304871	70017893	545361	45969722
contig_3131	chr-3	-	125630	28459	80369	70017893	1733914	21917220
contig_8358	chr-3	+	218458	134847	201228	70017893	17015678	57818000
contig_20280	chr-3	+	491650	50663	467364	70017893	203942	54131535
contig_15274	chr-3	-	2968	174	2321	70017893	17325045	21280141
contig_12399	chr-3	+	93698	684	3194	70017893	17325045	21280193
contig_1155	chr-3	+	785238	52598	677690	70017893	1272441	65745944
contig_5789	chr-3	+	23045	6753	8052	70017893	19806073	19807394
contig_10437	chr-3	-	7521	705	2153	70017893	19806073	19807550
contig_13938	chr-3	-	87981	47395	48841	70017893	19806073	19807550
contig_16473	chr-3	-	5213	1447	2904	70017893	19806073	19807550
contig_23109	chr-3	+	12557	5757	7205	70017893	19806073	19807550
contig_9143	chr-3	-	45380	40152	41600	70017893	19806073	19807550
contig_1118	chr-3	+	76062	10549	44785	70017893	14427473	27523336
contig_607	chr-3	-	1185206	125385	1128364	70017893	18303161	65146896
contig_13106	chr-3	+	3542	157	2952	70017893	20021291	20024482
contig_3133	chr-3	+	11056	3042	5259	70017893	546048	45969545
contig_7365	chr-3	-	49425	2827	6095	70017893	20119990	20123688
contig_7632	chr-3	+	120343	60898	64304	70017893	20119990	20123879
contig_21476	chr-3	-	24007	8019	9496	70017893	12434154	31944874
contig_17051	chr-3	+	7226	2313	4543	70017893	20391328	20512141
contig_20593	chr-3	-	13749	10825	13210	70017893	20391445	20512370
contig_24396	chr-3	-	18976	14676	16867	70017893	20510187	20512370
contig_2826	chr-3	+	34537	9035	15940	70017893	698680	51529535
contig_20013	chr-3	-	8904	3785	7451	70017893	1916609	38937564
contig_17115	chr-3	-	13697	53	3771	70017893	15033021	34715350
contig_14391	chr-3	-	38062	331	4501	70017893	21009000	21013013
contig_3676	chr-3	+	47085	24435	27172	70017893	545388	45969722
contig_1440	chr-3	-	1459605	231926	1162465	70017893	874283	23455368
contig_1042	chr-3	+	1613073	152519	1515438	70017893	7455673	61722697
contig_2685	chr-3	-	86234	40773	63370	70017893	4222348	39538172
contig_23614	chr-3	+	9336	129	2372	70017893	21451750	21454372
contig_7235	chr-3	+	12911	6946	9149	70017893	21451750	21454372
contig_8741	chr-3	+	101481	53942	56185	70017893	21451750	21454372
contig_14639	chr-3	+	21824	20005	21823	70017893	21452038	21454227
contig_20100	chr-3	+	24745	20163	23063	70017893	545361	45969722
contig_5360	chr-3	+	263479	23682	26607	70017893	545361	45969722
contig_8049	chr-3	+	16466	8146	11959	70017893	21821363	21824199
contig_3844	chr-3	+	320364	168508	298218	70017893	20119990	52577992
contig_5930	chr-3	-	247965	132826	139049	70017893	13934752	59931222
contig_24536	chr-3	+	128714	28541	98385	70017893	20021300	23463040
contig_20843	chr-3	-	76979	69963	71876	70017893	12432963	31944270
contig_6045	chr-3	-	4526	113	4112	70017893	15032880	34715350
contig_12514	chr-3	-	56711	24490	25668	70017893	12398240	32358512
contig_22460	chr-3	+	9065	41	3967	70017893	15032880	34715350
contig_3391	chr-3	+	16731	2435	10872	70017893	22600694	22608655
contig_1886	chr-3	-	54657	30313	35663	70017893	22603562	22608655
contig_4394	chr-3	-	618587	85844	528836	70017893	1734087	45841313
contig_23853	chr-3	-	54979	27908	30624	70017893	22877865	22881048
contig_17634	chr-3	+	22040	17674	18844	70017893	12978048	53287277
contig_6916	chr-3	+	215708	85798	106838	70017893	18211833	24851216
contig_1281	chr-3	+	421944	355212	399651	70017893	5911081	43230872
contig_2152	chr-3	-	112137	30617	99417	70017893	6173376	41875887
contig_10112	chr-3	+	40056	53	1071	70017893	23295026	23295970
contig_4730	chr-3	+	71508	42445	44714	70017893	545388	45969545
contig_2495	chr-3	-	310537	9253	186912	70017893	11645617	50610952
contig_21767	chr-3	-	17993	8206	11176	70017893	23459538	23462978
contig_7432	chr-3	-	55939	1915	8201	70017893	11297232	25739992
contig_2972	chr-3	+	1066234	9552	796959	70017893	7598663	62257171
contig_6930	chr-3	-	263399	22984	161967	70017893	1734093	29966845
contig_2117	chr-3	+	184195	111265	121040	70017893	14857770	43230885
contig_1829	chr-3	-	175400	3746	124351	70017893	11420424	32508112
contig_7439	chr-3	-	54388	32148	33900	70017893	23868380	23870270
contig_14657	chr-3	+	15571	5874	7660	70017893	23868473	23870265
contig_8341	chr-3	+	152008	9442	76357	70017893	6597984	49715634
contig_23598	chr-3	+	86214	12	19304	70017893	14857780	51529441
scaffold_11495	chr-3	-	339115	28739	291771	70017893	1096451	59333651
contig_16696	chr-3	+	5614	653	2775	70017893	16583464	32358293
contig_23876	chr-3	+	146883	37	53349	70017893	20119990	66115891
contig_874	chr-3	-	500121	3304	298095	70017893	20391326	42323624
contig_14122	chr-3	-	14638	3637	5286	70017893	24591741	24593451
contig_5341	chr-3	-	95852	77654	81393	70017893	24581266	24615902
contig_16206	chr-3	-	13779	6304	13669	70017893	21008976	30251907
contig_13795	chr-3	-	114684	15395	107768	70017893	15916900	45969545
contig_8850	chr-3	+	7276	1364	4586	70017893	24847997	24851216
contig_2657	chr-3	-	52237	30373	33117	70017893	20021291	54101016
contig_23326	chr-3	-	68967	61378	68776	70017893	24926566	24934450
contig_2704	chr-3	-	193371	185768	193173	70017893	24926653	24934450
contig_9158	chr-3	-	41264	27749	35322	70017893	24926566	24934618
contig_2596	chr-3	-	73002	8385	16974	70017893	24926566	24934646
contig_824	chr-3	+	633048	56277	571810	70017893	5049368	63756907
contig_23412	chr-3	-	101759	17094	94381	70017893	5049306	65582398
contig_334	chr-3	+	579696	127707	362260	70017893	6029888	51286786
contig_15968	chr-3	+	42066	30862	33068	70017893	16583420	32358512
contig_14385	chr-3	-	10856	7953	10700	70017893	20021291	54100858
contig_1248	chr-3	+	139641	15780	108542	70017893	14020254	30251907
contig_14068	chr-3	+	35823	33668	34949	70017893	25353927	25355170
contig_2494	chr-3	+	787397	212450	765834	70017893	532305	67319592
contig_2364	chr-3	+	246889	6	103479	70017893	14857780	43230899
contig_2782	chr-3	+	120753	48227	109739	70017893	16482541	47611932
contig_417	chr-3	-	102971	6145	75161	70017893	1734087	59818359
contig_8202	chr-3	+	13469	4474	11599	70017893	17325206	30251821
contig_22733	chr-3	-	15706	4059	11302	70017893	7277622	65582398
contig_16619	chr-3	-	13919	3785	6082	70017893	12872853	43408060
contig_8977	chr-3	+	74084	46767	50020	70017893	1916518	36564476
contig_6811	chr-3	+	261776	18789	171244	70017893	20009011	32508815
contig_17483	chr-3	+	7981	122	2607	70017893	26209490	26211767
contig_9202	chr-3	-	19355	67	1764	70017893	18303366	34482803
contig_7694	chr-3	+	14067	9	6832	70017893	26241177	26255147
contig_5440	chr-3	-	154205	18	5165	70017893	20009030	32507623
contig_3310	chr-3	-	62750	38641	43440	70017893	20009030	32507519
contig_17078	chr-3	-	201000	25009	31237	70017893	20009030	32508815
contig_10043	chr-3	-	71273	59242	65149	70017893	20009030	32508815
contig_6546	chr-3	+	605081	440382	539572	70017893	1734087	65485566
contig_525	chr-3	-	102883	8261	72410	70017893	11420424	53911929
contig_8020	chr-3	-	71395	41178	58058	70017893	18729711	30486046
contig_15280	chr-3	+	91035	2799	27611	70017893	11297851	38236938
contig_16532	chr-3	-	41831	6866	28156	70017893	281978	68820030
contig_8392	chr-3	-	48867	6781	47674	70017893	23882307	42661430
contig_15023	chr-3	+	47389	25329	44723	70017893	12791552	41876111
contig_2357	chr-3	+	48727	7762	16114	70017893	18303186	34486584
contig_14322	chr-3	-	631511	127602	520616	70017893	7455735	28926489
contig_5378	chr-3	-	444349	332673	434699	70017893	4793185	43230899
contig_13577	chr-3	+	8950	5933	8850	70017893	24513670	30251601
contig_5612	chr-3	-	120744	26307	113655	70017893	532327	27117030
contig_14618	chr-3	+	190198	35331	140923	70017893	26885319	26896876
contig_18338	chr-3	+	85274	7034	8427	70017893	1734087	61464195
contig_23631	chr-3	-	36138	9843	26004	70017893	27103028	27117030
contig_13165	chr-3	-	46846	35737	39245	70017893	24512307	30251874
contig_14418	chr-3	-	169974	67544	70762	70017893	24512307	30251907
contig_2118	chr-3	-	48841	38984	48834	70017893	14857812	43230878
contig_19202	chr-3	+	10440	9	3504	70017893	24512307	30251907
contig_18414	chr-3	-	10517	6999	10504	70017893	24512307	30251907
contig_6644	chr-3	-	9529	6473	8205	70017893	24513984	30251883
contig_22692	chr-3	+	6268	7	3534	70017893	24512307	30251907
contig_7925	chr-3	+	19012	6	3498	70017893	24512307	30251907
contig_11761	chr-3	-	12668	13	3554	70017893	24512307	30251907
contig_7130	chr-3	-	14299	10769	14105	70017893	24512507	30251921
contig_13872	chr-3	-	8926	5412	8790	70017893	24512552	30251907
contig_7125	chr-3	+	126497	17903	46097	70017893	15300547	39542776
contig_1790	chr-3	+	46063	8560	18711	70017893	8657803	67439590
contig_306	chr-3	+	953418	50392	379468	70017893	1450478	51286786
contig_1995	chr-3	-	89543	1986	83087	70017893	19806073	35493584
contig_24376	chr-3	-	34797	13724	14636	70017893	27429984	27430936
contig_13705	chr-3	+	421666	14483	163983	70017893	13597081	62324486
contig_19735	chr-3	+	4769	31	3468	70017893	24512307	30251907
contig_18369	chr-3	-	32998	2000	6708	70017893	23882307	31949502
contig_11578	chr-3	+	7810	3832	6898	70017893	23882357	31949621
contig_2423	chr-3	-	57970	12865	46222	70017893	10115450	48176331
contig_3489	chr-3	+	171122	58746	64059	70017893	27720724	27726898
contig_1882	chr-3	+	104484	69517	86639	70017893	8438946	63691938
contig_11169	chr-3	-	5362	778	4161	70017893	15032925	52023914
contig_15737	chr-3	+	15711	6743	10558	70017893	28087541	28090766
contig_14326	chr-3	-	119899	12131	58757	70017893	28151697	28209386
contig_18564	chr-3	-	25595	5225	7296	70017893	24581214	30652344
contig_1136	chr-3	-	491471	93742	396918	70017893	4793185	61667290
contig_2460	chr-3	+	943664	87495	877789	70017893	27228784	36248587
contig_11050	chr-3	-	16940	6308	7508	70017893	28357097	28358409
contig_3762	chr-3	-	299665	126088	278198	70017893	1734374	55266260
contig_17915	chr-3	+	23094	8083	20010	70017893	15916804	47611743
contig_1437	chr-3	+	191377	37025	52298	70017893	13603574	51286786
contig_19731	chr-3	+	79873	33556	71393	70017893	24512307	38708679
contig_23263	chr-3	+	114955	19428	81031	70017893	23571716	42771442
contig_19479	chr-3	+	460497	12	395746	70017893	20009096	63292486
contig_10838	chr-3	+	38547	14246	15658	70017893	28795958	28797350
contig_10900	chr-3	+	477893	55363	464589	70017893	24037192	64971085
contig_18	chr-3	+	162081	4030	55869	70017893	11420424	46237004
contig_3007	chr-3	-	104534	37665	77864	70017893	19790363	36846587
contig_19802	chr-3	-	12194	7587	11451	70017893	14857780	43230885
contig_4510	chr-3	-	47292	11888	47287	70017893	14857780	43230899
contig_1535	chr-3	-	725286	178477	696925	70017893	1049545	37665096
contig_2610	chr-3	-	259253	5	9926	70017893	14857780	43230899
[truncated: 14,315 more rows]

## Sheet: AEP to Viridissima
Query	Target	Strand	Q-len	Q-start	Q-stop	T-len	T-start	T-stop
scaffold1840	chr-1	-	1343	954	1215	81026817	1308850	1309140
scaffold580	chr-1	+	126010	49	111284	81026817	1309802	78035514
scaffold1860	chr-1	+	1311	414	567	81026817	4147185	4147338
scaffold391	chr-1	+	19036	1001	1079	81026817	4155800	4155877
scaffold292	chr-1	+	113413	12998	105887	81026817	4129186	8174844
scaffold938	chr-1	-	9163	104	2724	81026817	4477495	35989806
scaffold1944	chr-1	+	1177	406	597	81026817	2453940	9014096
scaffold2499	chr-1	-	2645	30	130	81026817	4246453	7565245
scaffold320	chr-1	+	84961	17739	84830	81026817	4129021	59309556
scaffold699	chr-1	+	28842	17615	24067	81026817	4140209	8174539
scaffold1298	chr-1	+	4113	85	1004	81026817	4336240	9329352
scaffold784	chr-1	+	17326	6044	16118	81026817	3195349	33966511
scaffold247	chr-1	+	183548	22113	183204	81026817	2917990	73492408
scaffold2362	chr-1	-	6178	33	418	81026817	8174859	8175202
scaffold879	chr-1	-	11532	6977	11532	81026817	4798515	76790467
scaffold610	chr-1	+	70613	11224	45210	81026817	7056874	42427409
scaffold1357	chr-1	-	3189	1248	2400	81026817	10165195	10166334
scaffold31	chr-1	+	1743463	171698	1608442	81026817	6122	79277171
scaffold2168	chr-1	-	29271	6151	25631	81026817	9278191	11029507
scaffold1050	chr-1	-	6481	1259	5498	81026817	7347618	15042462
scaffold1511	chr-1	-	2111	1248	2077	81026817	23754	22949510
scaffold98	chr-1	+	802194	205	670154	81026817	4613747	80972475
scaffold2135	chr-1	+	42793	3174	26686	81026817	2360547	68754869
scaffold72	chr-1	-	1079704	1201	1073066	81026817	4128547	80540289
scaffold866	chr-1	+	12294	6402	6485	81026817	13311675	13311758
scaffold2088	chr-1	+	93765	18349	83466	81026817	4128660	57408230
scaffold2223	chr-1	+	18375	107	12699	81026817	376816	24065999
scaffold1774	chr-1	+	1449	281	514	81026817	14996107	14996374
scaffold298	chr-1	+	107202	24957	106300	81026817	4128660	50465212
scaffold442	chr-1	-	6166	3	1571	81026817	15592010	15782184
scaffold328	chr-1	+	77363	9622	67811	81026817	7347618	53369651
scaffold2157	chr-1	-	31878	15863	28413	81026817	7610824	25031052
scaffold1144	chr-1	+	5408	4591	4838	81026817	16531575	16531861
scaffold48	chr-1	-	1397456	10508	1311529	81026817	1525005	80967737
scaffold2190	chr-1	+	24357	3619	16234	81026817	14989881	58838793
scaffold525	chr-1	-	672988	42623	672831	81026817	2961466	80968317
scaffold1134	chr-1	-	5474	1293	1544	81026817	11453957	25772368
scaffold983	chr-1	-	8400	205	1482	81026817	19896634	19897698
scaffold2338	chr-1	+	7197	6776	7156	81026817	15617773	31714685
scaffold459	chr-1	+	5287	3591	4277	81026817	20357067	20357833
scaffold337	chr-1	-	68671	29516	54416	81026817	8173824	28649867
scaffold2256	chr-1	-	13859	1410	3807	81026817	20587948	21486890
scaffold2051	chr-1	+	494870	618	467636	81026817	7622923	80968317
scaffold893	chr-1	-	10967	5224	6636	81026817	21545479	21546899
scaffold527	chr-1	-	515708	915	376083	81026817	4784216	79904432
scaffold1691	chr-1	+	1583	3	1429	81026817	24069698	24072535
scaffold330	chr-1	-	75397	2888	74122	81026817	4096550	78211528
scaffold190	chr-1	+	307043	7	282919	81026817	4129124	74550248
scaffold892	chr-1	-	11072	7896	9092	81026817	25282985	25284174
scaffold2322	chr-1	-	7815	3235	7773	81026817	23868899	73405276
scaffold2078	chr-1	+	123047	634	117636	81026817	2721533	73050615
scaffold178	chr-1	+	359333	4816	357439	81026817	4096007	73577468
scaffold1111	chr-1	+	5683	4878	5362	81026817	28649810	28650332
scaffold430	chr-1	-	8129	367	5435	81026817	28648436	28652106
scaffold924	chr-1	-	9503	8485	9500	81026817	28650573	28651542
scaffold2507	chr-1	-	2527	253	1159	81026817	28651208	28652080
scaffold1307	chr-1	+	3978	2457	3077	81026817	28651527	28652123
scaffold2477	chr-1	-	2952	2593	2830	81026817	28651674	28652101
scaffold108	chr-1	+	730863	54037	628195	81026817	5616304	80848152
scaffold140	chr-1	+	470431	788	466119	81026817	4149672	77624001
scaffold103	chr-1	-	780002	1756	751356	81026817	1713994	75044918
scaffold2427	chr-1	+	4040	2066	2505	81026817	12390066	80167760
scaffold594	chr-1	+	95530	11	89985	81026817	8158146	80968317
scaffold1674	chr-1	-	1635	1448	1607	81026817	31460403	31508303
scaffold1293	chr-1	+	4124	928	1118	81026817	31539803	31539993
scaffold172	chr-1	+	387476	5843	321070	81026817	3217309	77158653
scaffold2134	chr-1	+	43510	22882	35969	81026817	10247841	51103921
scaffold127	chr-1	+	530910	16673	511393	81026817	1806691	73068557
scaffold277	chr-1	+	128933	10747	128816	81026817	16050044	75569073
scaffold244	chr-1	+	187894	11818	155459	81026817	6441270	50464615
scaffold1372	chr-1	-	2939	2752	2877	81026817	33705527	33705674
scaffold1285	chr-1	-	4167	2976	4149	81026817	34045186	34046355
scaffold317	chr-1	+	87390	13214	68562	81026817	18499874	80849038
scaffold1790	chr-1	-	1425	76	865	81026817	15106673	45562199
scaffold1314	chr-1	-	3935	3272	3920	81026817	34412958	34413611
scaffold1110	chr-1	+	5697	38	1136	81026817	23071610	46929844
scaffold2054	chr-1	+	379843	17285	376768	81026817	7168661	66869185
scaffold207	chr-1	+	261908	39616	260912	81026817	4170328	74700569
scaffold92	chr-1	+	854171	38991	645857	81026817	1311095	72757032
scaffold2146	chr-1	+	36903	8274	21346	81026817	17023119	51033699
scaffold1189	chr-1	+	4872	3677	4864	81026817	35409645	35410817
scaffold2411	chr-1	+	4472	2401	2620	81026817	19839239	49114186
scaffold272	chr-1	-	140398	0	136338	81026817	153325	70865654
scaffold578	chr-1	+	131767	17239	130773	81026817	22556640	70758020
scaffold1034	chr-1	-	6820	48	1494	81026817	38647301	38648942
scaffold1172	chr-1	-	5094	1142	1356	81026817	38790437	38790651
scaffold88	chr-1	+	865744	6915	864665	81026817	722748	80967922
scaffold119	chr-1	+	617504	39116	610306	81026817	2896827	80444814
scaffold1754	chr-1	-	1472	1336	1376	81026817	2961467	75394489
scaffold539	chr-1	+	295239	15068	279625	81026817	7713055	62527901
scaffold1903	chr-1	+	1237	270	1218	81026817	10771489	80966943
scaffold2352	chr-1	-	6565	18	534	81026817	38833593	40906513
scaffold1584	chr-1	-	1826	293	1346	81026817	40449721	40450727
scaffold369	chr-1	-	36354	13710	24446	81026817	37712647	80848147
scaffold89	chr-1	+	861419	7208	855315	81026817	2917955	80967444
scaffold121	chr-1	-	585882	11558	569253	81026817	7687360	78748302
scaffold757	chr-1	-	19862	62	15441	81026817	41664628	59764415
scaffold725	chr-1	+	23849	13885	22503	81026817	8967619	67624756
scaffold226	chr-1	+	210937	64226	206795	81026817	26159950	80848281
scaffold2356	chr-1	+	6315	5580	6010	81026817	16063197	51992324
scaffold1128	chr-1	-	5515	1635	4671	81026817	42984506	42987088
scaffold542	chr-1	-	277457	486	257078	81026817	2762738	80968391
scaffold616	chr-1	+	64086	8089	52892	81026817	14042050	68517649
scaffold2402	chr-1	+	4682	674	4663	81026817	43937814	43941537
scaffold2109	chr-1	+	61201	566	43596	81026817	33852328	80972475
scaffold37	chr-1	+	1613776	10405	1605812	81026817	775305	80972465
scaffold602	chr-1	-	83760	3878	83753	81026817	4172717	59103921
scaffold1295	chr-1	+	4119	1104	2695	81026817	45652319	45791586
scaffold1931	chr-1	-	1193	595	706	81026817	45894113	45894224
scaffold766	chr-1	-	19114	17941	18900	81026817	45936150	45937252
scaffold553	chr-1	+	202444	3684	127897	81026817	8167541	75044960
scaffold2263	chr-1	+	13052	1647	8920	81026817	722747	59801794
scaffold78	chr-1	+	1013555	8878	997936	81026817	8146205	80404203
scaffold2102	chr-1	+	63241	16175	38512	81026817	9933879	76038863
scaffold675	chr-1	+	35760	1909	28199	81026817	43270891	48094288
scaffold1123	chr-1	+	5549	710	1594	81026817	30487020	69338590
scaffold1272	chr-1	+	4250	3128	4238	81026817	44561363	58548282
scaffold347	chr-1	+	58500	1403	45853	81026817	8173761	75569254
scaffold1108	chr-1	+	5719	499	1464	81026817	36079732	58297642
scaffold959	chr-1	-	8917	5946	6886	81026817	22415874	72903149
scaffold113	chr-1	+	685049	52979	681603	81026817	722757	78136866
scaffold19	chr-1	+	2296853	34348	2215794	81026817	325393	80455817
scaffold1848	chr-1	-	1334	946	1128	81026817	50464433	50464615
scaffold1297	chr-1	-	4115	2209	3265	81026817	50521961	50523032
scaffold1713	chr-1	+	1549	1091	1542	81026817	30042282	78379471
scaffold2393	chr-1	-	4964	51	652	81026817	27669730	74129086
scaffold2410	chr-1	-	4488	32	2360	81026817	27185137	74855080
scaffold99	chr-1	+	801901	31342	782019	81026817	4093755	80972513
scaffold2554	chr-1	+	1879	22	731	81026817	46125844	64049151
scaffold10	chr-1	+	3096284	13933	3046590	81026817	842895	80470493
scaffold2252	chr-1	+	14003	11626	13033	81026817	26317114	51865800
scaffold731	chr-1	+	23594	8495	18215	81026817	8967611	67282611
scaffold2337	chr-1	+	7202	240	6458	81026817	43644604	59748002
scaffold571	chr-1	-	154118	89546	126671	81026817	5699733	72627586
scaffold2049	chr-1	+	816366	13730	812677	81026817	4153776	76789949
scaffold394	chr-1	+	17567	2792	10836	81026817	4859170	71474022
scaffold1216	chr-1	+	4678	81	1716	81026817	38735641	59519670
scaffold2144	chr-1	-	38087	26111	38070	81026817	33852328	60290838
scaffold364	chr-1	-	39101	5400	28827	81026817	4095695	76735632
scaffold1051	chr-1	-	6454	319	959	81026817	35409793	71804937
scaffold1001	chr-1	+	7499	4364	5290	81026817	29589874	71350089
scaffold1551	chr-1	+	1942	11	1888	81026817	55080932	55086198
scaffold853	chr-1	+	12932	7341	10922	81026817	47356657	63323697
scaffold969	chr-1	-	8840	1426	5547	81026817	24909907	77266369
scaffold624	chr-1	-	58242	55668	58227	81026817	55825555	55948102
scaffold202	chr-1	-	269095	33198	212736	81026817	301069	77524640
scaffold143	chr-1	+	467659	2	447042	81026817	8967625	62358026
scaffold2368	chr-1	-	5934	3942	4068	81026817	40239875	73824485
scaffold1360	chr-1	-	3139	1545	3044	81026817	48313729	64336674
scaffold564	chr-1	-	180451	685	173135	81026817	3217819	80404208
scaffold56	chr-1	+	1261883	19766	1215600	81026817	595565	78256332
scaffold2242	chr-1	-	15351	6470	13390	81026817	29589802	61558140
scaffold2125	chr-1	-	49662	6660	25977	81026817	13031045	60374245
scaffold840	chr-1	+	13679	174	1001	81026817	60678531	60679325
scaffold635	chr-1	-	50557	1809	48856	81026817	60662412	64013174
scaffold898	chr-1	-	10522	10022	10446	81026817	60854764	60855184
scaffold1922	chr-1	+	1205	275	552	81026817	37514159	73847842
scaffold44	chr-1	+	1507866	16665	1506545	81026817	2920435	80404182
scaffold1401	chr-1	+	2728	2601	2683	81026817	61380460	61380542
scaffold964	chr-1	+	8902	2691	7460	81026817	6715873	75241532
scaffold344	chr-1	-	61454	4114	59717	81026817	1130482	79586726
scaffold1815	chr-1	-	1387	432	562	81026817	63308598	63308728
scaffold239	chr-1	+	193094	13534	115897	81026817	6576991	80972465
scaffold811	chr-1	+	16281	1524	5335	81026817	60370262	69304541
scaffold920	chr-1	+	9560	7792	9127	81026817	56745342	72727264
scaffold1328	chr-1	-	3791	1488	1557	81026817	59803613	70738361
scaffold2090	chr-1	+	91778	1127	82960	81026817	505683	78733616
scaffold1268	chr-1	-	4271	252	3804	81026817	34620	66461269
scaffold349	chr-1	-	57331	16904	56138	81026817	49411639	80966953
scaffold1709	chr-1	+	1553	1248	1529	81026817	66763520	66764027
scaffold2189	chr-1	+	24702	1922	17490	81026817	40000625	79094602
scaffold2011	chr-1	+	1066	614	969	81026817	67835257	67835610
scaffold712	chr-1	-	26022	10417	15299	81026817	67860373	74657424
scaffold719	chr-1	+	24851	18134	23601	81026817	68753867	68759745
scaffold1375	chr-1	+	2918	2048	2160	81026817	68867762	68867874
scaffold692	chr-1	+	31290	23893	28089	81026817	63579973	77266369
scaffold1503	chr-1	-	2135	58	741	81026817	70575123	70575963
scaffold2553	chr-1	+	1886	841	1865	81026817	70692696	70693708
scaffold665	chr-1	-	37837	11706	15121	81026817	70824676	70828492
scaffold907	chr-1	+	9914	1750	9898	81026817	67218817	73627369
scaffold1969	chr-1	+	1141	1012	1133	81026817	66978150	75145116
scaffold2389	chr-1	-	5084	4417	5047	81026817	63580090	77262324
scaffold1897	chr-1	-	1253	61	351	81026817	71350021	71350303
scaffold1476	chr-1	-	2290	1446	2275	81026817	71606445	71606489
scaffold2480	chr-1	-	2937	395	2110	81026817	71764472	71766168
scaffold2208	chr-1	+	20741	4209	4622	81026817	73577276	73577692
scaffold1768	chr-1	+	1455	1231	1369	81026817	74550225	74550345
scaffold1743	chr-1	-	1493	17	106	81026817	74671318	74674650
scaffold2034	chr-1	-	1030	315	493	81026817	74988890	74989068
scaffold373	chr-1	-	31966	4645	27238	81026817	14989285	76736506
scaffold908	chr-1	+	9909	1709	9901	81026817	28509568	76784869
scaffold1338	chr-1	-	3618	77	3593	81026817	79986944	79989562
scaffold1540	chr-1	+	1995	22	1250	81026817	80847080	80848309
scaffold961	chr-2	+	8917	33	332	74586745	747855	1768114
scaffold1282	chr-2	-	4206	295	1612	74586745	737887	1758612
scaffold2312	chr-2	-	8310	5268	7063	74586745	1605896	1607787
scaffold1356	chr-2	+	3213	310	828	74586745	2239598	2240119
scaffold909	chr-2	-	9907	5157	9727	74586745	2475367	22993554
scaffold763	chr-2	+	19579	16291	19518	74586745	3789031	3792299
scaffold384	chr-2	-	21450	19561	21181	74586745	4774435	4776066
scaffold2336	chr-2	+	7216	2241	6514	74586745	6278957	7742109
scaffold994	chr-2	-	7786	3466	6747	74586745	6270828	7730858
scaffold884	chr-2	-	11332	9788	11328	74586745	1606404	16213940
scaffold136	chr-2	+	482058	130948	410541	74586745	4859561	69275965
scaffold436	chr-2	-	7395	640	1538	74586745	11677014	11677988
scaffold2603	chr-2	-	1296	31	383	74586745	11677945	11678466
scaffold1070	chr-2	+	6147	4224	5264	74586745	11694853	11696118
scaffold133	chr-2	+	498058	32923	466700	74586745	6985872	70476440
scaffold463	chr-2	-	5010	3345	4644	74586745	11958693	11960367
scaffold540	chr-2	+	293133	33757	277179	74586745	11958693	50369763
scaffold319	chr-2	-	85784	41264	82883	74586745	56155	50025859
scaffold1434	chr-2	-	2509	550	1323	74586745	12427661	34878003
scaffold327	chr-2	-	78506	25466	56225	74586745	5021171	51895281
scaffold2283	chr-2	+	10192	5529	9417	74586745	12722293	50371856
scaffold2063	chr-2	-	212604	10443	163086	74586745	1605282	61222733
scaffold2114	chr-2	-	58376	9386	39029	74586745	14205248	64622801
scaffold1112	chr-2	-	5683	4060	5679	74586745	13388514	15484644
scaffold261	chr-2	-	155968	16115	47834	74586745	8534070	62092566
scaffold1218	chr-2	+	4669	3404	4571	74586745	836363	15446146
scaffold1544	chr-2	-	1976	1507	1665	74586745	15697776	15824313
scaffold8	chr-2	+	3169260	91097	3103961	74586745	1605185	73975700
scaffold223	chr-2	+	218958	163	205946	74586745	1452759	65280114
scaffold761	chr-2	+	19622	150	6278	74586745	16856704	16863122
scaffold322	chr-2	-	83317	9085	76654	74586745	15425020	73261725
scaffold427	chr-2	-	8533	1799	2566	74586745	17254587	17255348
scaffold1992	chr-2	-	1106	66	158	74586745	17586659	17586751
scaffold889	chr-2	+	11113	629	1226	74586745	18002956	18003553
scaffold2237	chr-2	-	8056	2725	2814	74586745	18235096	18235185
scaffold644	chr-2	-	45201	26638	31836	74586745	18689669	18725503
scaffold848	chr-2	-	13299	38	10552	74586745	19012063	48910548
scaffold1555	chr-2	+	1927	1619	1914	74586745	19165752	19166047
scaffold2360	chr-2	-	6193	3203	6187	74586745	1766448	43924021
scaffold2245	chr-2	-	14700	2458	3739	74586745	19864806	19866262
scaffold2229	chr-2	+	17282	6694	10069	74586745	20075120	20313329
scaffold315	chr-2	-	87870	64793	80567	74586745	14962146	58476983
scaffold799	chr-2	-	16723	4485	5342	74586745	20263289	20264147
scaffold857	chr-2	+	12720	176	4709	74586745	20075122	20466519
scaffold765	chr-2	-	19529	17927	18465	74586745	20465955	20466521
scaffold1987	chr-2	-	1110	20	175	74586745	19246407	23239671
scaffold2481	chr-2	+	2929	1822	2289	74586745	21603465	21603932
scaffold870	chr-2	+	11946	925	4678	74586745	22708914	22712263
scaffold2545	chr-2	+	2022	64	235	74586745	23074916	23075076
scaffold2127	chr-2	+	48115	23128	42905	74586745	18292366	41831641
scaffold2082	chr-2	+	110851	22302	99933	74586745	976474	36908260
scaffold2281	chr-2	-	10474	11	5238	74586745	23838251	23841533
scaffold666	chr-2	+	37722	19488	21533	74586745	23864128	34421149
scaffold84	chr-2	+	960057	14736	959775	74586745	1605770	70829990
scaffold462	chr-2	-	5080	1269	1322	74586745	22013895	29473954
scaffold41	chr-2	+	1524786	15685	1452952	74586745	54224	73813775
scaffold1923	chr-2	+	1204	737	1116	74586745	16747604	34073369
scaffold625	chr-2	-	58046	50642	56286	74586745	18292648	51431291
scaffold2491	chr-2	+	2059	328	1998	74586745	21876999	37282587
scaffold1088	chr-2	-	5940	4579	5470	74586745	15764581	46330473
scaffold321	chr-2	+	83425	18777	81928	74586745	1463910	54924737
scaffold1526	chr-2	+	2037	1593	1956	74586745	1640374	32186557
scaffold36	chr-2	+	1621483	16312	1611094	74586745	1732320	73810796
scaffold640	chr-2	+	47758	41863	45344	74586745	11556561	52367701
scaffold2209	chr-2	+	20586	32	1090	74586745	1017439	56651839
scaffold1938	chr-2	-	1186	55	203	74586745	26858252	40992107
scaffold1785	chr-2	+	1435	1214	1369	74586745	24620929	63063972
scaffold2558	chr-2	+	1808	72	483	74586745	15654952	69753404
scaffold1776	chr-2	-	1447	1016	1403	74586745	35377617	35378187
scaffold1021	chr-2	-	7110	597	2127	74586745	17115056	55410210
scaffold887	chr-2	-	11220	1952	2162	74586745	5545494	70075205
scaffold1028	chr-2	+	6930	1894	6145	74586745	36687294	36696453
scaffold1171	chr-2	-	5099	22	4551	74586745	34876119	59014594
scaffold2133	chr-2	+	44254	34313	41204	74586745	1604918	73161158
scaffold153	chr-2	+	451126	130754	395621	74586745	52499	53512299
scaffold2396	chr-2	+	4795	2342	4518	74586745	33421478	61495286
scaffold5	chr-2	+	3552122	17594	3544147	74586745	2755786	73813480
scaffold726	chr-2	+	23849	604	8481	74586745	28797562	51955152
scaffold808	chr-2	-	16334	647	1265	74586745	40522590	40523153
scaffold538	chr-2	+	304693	13449	286988	74586745	973927	60325284
scaffold1217	chr-2	-	4672	812	3035	74586745	37269612	44268141
scaffold273	chr-2	+	135855	66	124315	74586745	1640325	73752436
scaffold2500	chr-2	+	2597	51	2322	74586745	15419112	74564030
scaffold2123	chr-2	+	50606	20838	43541	74586745	2672104	56198538
scaffold2071	chr-2	-	140578	11763	133601	74586745	7352208	74151958
scaffold204	chr-2	+	268069	31064	264597	74586745	10943403	71078635
scaffold135	chr-2	+	496322	18744	484895	74586745	56011	66029428
scaffold289	chr-2	+	116659	7730	99131	74586745	9441187	60921317
scaffold2159	chr-2	+	32130	30709	30849	74586745	29542006	60170508
scaffold601	chr-2	+	84805	14250	72469	74586745	11958693	52027687
scaffold637	chr-2	+	49184	33209	43989	74586745	23367432	65734530
scaffold2400	chr-2	-	4715	85	1784	74586745	44629582	44631278
scaffold293	chr-2	+	111650	7170	79715	74586745	14572963	73810641
scaffold95	chr-2	+	835432	99184	834386	74586745	11251327	72114446
scaffold713	chr-2	-	25932	2880	6835	74586745	29865977	60572637
scaffold160	chr-2	+	434034	148536	384692	74586745	1605893	73162164
scaffold490	chr-2	-	2238	1862	2102	74586745	25179479	68442336
scaffold482	chr-2	-	2596	14	1705	74586745	44233641	48584493
scaffold955	chr-2	+	8947	1373	2884	74586745	47322536	47324054
scaffold1098	chr-2	-	5837	582	5176	74586745	15110871	48966119
scaffold2184	chr-2	+	25333	606	18156	74586745	32151437	69111628
scaffold774	chr-2	-	18395	16804	18263	74586745	40592786	56652263
scaffold208	chr-2	+	261029	33385	212336	74586745	19334287	71431254
scaffold2236	chr-2	+	13709	8416	10720	74586745	35392280	61358456
scaffold359	chr-2	-	48365	40984	47199	74586745	23135848	54924737
scaffold561	chr-2	+	182607	2498	165111	74586745	8370319	74152854
scaffold1024	chr-2	+	6988	691	4319	74586745	43015105	54651288
scaffold1623	chr-2	+	1728	22	1662	74586745	49401450	49402676
scaffold779	chr-2	-	17844	3388	6393	74586745	50364735	50367809
scaffold231	chr-2	-	206091	48613	190855	74586745	19314774	56706124
scaffold1762	chr-2	-	1467	141	929	74586745	37098653	64272382
scaffold409	chr-2	-	12276	6548	11762	74586745	46060413	54470100
scaffold54	chr-2	+	1296150	104	1271666	74586745	54209	74476396
scaffold1027	chr-2	-	6933	2863	6384	74586745	45626956	62267267
scaffold125	chr-2	+	549768	38217	532898	74586745	1790661	67911322
scaffold132	chr-2	-	501995	12382	501099	74586745	22648903	55774912
scaffold2038	chr-2	+	1029	46	275	74586745	54560750	54560978
scaffold914	chr-2	+	9780	9105	9476	74586745	54575983	54576344
scaffold550	chr-2	-	212771	22881	193024	74586745	5543439	67265154
scaffold2495	chr-2	+	2726	1373	2618	74586745	37784460	71428729
scaffold1404	chr-2	+	2708	1838	2567	74586745	57234942	57235827
scaffold1722	chr-2	+	1530	1121	1283	74586745	57270935	57271097
scaffold155	chr-2	+	441047	38981	439005	74586745	53521	69346472
scaffold738	chr-2	-	22406	6358	7268	74586745	59098216	59099124
scaffold792	chr-2	+	17087	1169	4449	74586745	44233266	71301375
scaffold1061	chr-2	-	6336	1358	5201	74586745	59946997	59950818
scaffold646	chr-2	-	43460	15857	40540	74586745	22720982	61392704
scaffold876	chr-2	-	11604	6211	6653	74586745	61215330	61385507
scaffold859	chr-2	-	12692	8657	9613	74586745	50753441	72115030
scaffold1826	chr-2	-	1365	159	420	74586745	61222488	61392710
scaffold1521	chr-2	-	2060	531	1206	74586745	48966256	71347209
scaffold381	chr-2	-	25136	19127	22518	74586745	48253777	71030264
scaffold1243	chr-2	+	4493	2816	4265	74586745	60462487	68442598
scaffold569	chr-2	-	163367	36339	84250	74586745	30309651	73808007
scaffold1115	chr-2	-	5639	19	4035	74586745	61625049	62850299
scaffold1287	chr-2	-	4161	83	936	74586745	61627558	62847793
scaffold617	chr-2	-	63920	23029	26502	74586745	61625049	62850299
scaffold2059	chr-2	+	304298	101759	275946	74586745	46328127	73739020
scaffold1597	chr-2	+	1795	307	590	74586745	61799847	62685555
scaffold2057	chr-2	+	319523	64745	189606	74586745	8534061	66717213
scaffold171	chr-2	-	388008	38	384241	74586745	12814760	72154822
scaffold220	chr-2	-	229289	52458	125748	74586745	54563926	68328411
scaffold2280	chr-2	+	10922	6123	9303	74586745	62214974	70525146
scaffold338	chr-2	-	68019	44028	67343	74586745	61385046	67027023
scaffold2170	chr-2	-	29166	5929	19288	74586745	58204281	73755442
scaffold1118	chr-2	+	5593	73	1537	74586745	66471460	66472309
scaffold1212	chr-2	-	4710	2955	3958	74586745	42238549	69282264
scaffold1461	chr-2	-	2377	566	2290	74586745	69985861	69987656
scaffold255	chr-2	-	169310	16770	128954	74586745	20466358	73846589
scaffold1145	chr-2	+	5405	1096	2283	74586745	73507546	73508957
scaffold2522	chr-2	-	2302	2026	2270	74586745	73752294	73752599
scaffold2244	chr-2	-	6208	3106	3815	74586745	73752294	73755479
scaffold841	chr-2	-	13572	10360	13411	74586745	73762935	73766552
scaffold577	chr-2	-	135984	72659	96806	74586745	71302726	73813775
scaffold1003	chr-2	+	7408	3923	7383	74586745	73807682	73811365
scaffold353	chr-2	+	51513	19498	25578	74586745	73807682	73813778
scaffold450	chr-2	+	5826	657	2534	74586745	74150783	74151990
scaffold895	chr-2	+	10847	140	265	74586745	74426318	74426440
scaffold2643	chr-3	-	813	621	810	70017893	184900	185089
scaffold1175	chr-3	+	5074	12	842	70017893	2227708	2228516
scaffold497	chr-3	+	1807	916	1542	70017893	2639353	2640371
scaffold246	chr-3	+	184082	51341	184068	70017893	1095760	61637946
scaffold705	chr-3	+	26522	12703	26487	70017893	494171	28345233
scaffold1219	chr-3	-	4666	160	1058	70017893	4245178	4246046
scaffold1515	chr-3	+	2096	523	1487	70017893	4845828	4846776
scaffold874	chr-3	+	11674	1030	11361	70017893	3316571	27537607
scaffold2414	chr-3	+	4377	1	836	70017893	8521382	8522230
scaffold410	chr-3	+	12222	130	2161	70017893	8867907	8869846
scaffold1348	chr-3	-	3359	1418	2775	70017893	9963143	9964500
scaffold1095	chr-3	-	5893	4169	4527	70017893	3628172	19092977
scaffold1400	chr-3	+	2735	476	516	70017893	10350412	10350452
scaffold2295	chr-3	+	9190	638	9107	70017893	1016549	54337151
scaffold2180	chr-3	+	27355	10990	18963	70017893	11201141	62254181
scaffold1760	chr-3	-	1467	680	725	70017893	13180957	13181002
scaffold2234	chr-3	-	15152	16	12100	70017893	11202197	27547766
scaffold1572	chr-3	-	1873	68	1843	70017893	4241989	49685191
scaffold1730	chr-3	+	1520	1228	1483	70017893	14536106	14536362
scaffold588	chr-3	-	110852	34275	107403	70017893	2417112	63292315
scaffold2330	chr-3	+	7510	2565	3993	70017893	11527184	14786615
scaffold30	chr-3	+	1757802	28476	1747477	70017893	1128376	67763630
scaffold1384	chr-3	+	2869	1297	1836	70017893	15095100	15095633
scaffold2544	chr-3	+	2029	707	1733	70017893	15289799	15290750
scaffold1256	chr-3	-	4383	84	1464	70017893	7543258	28792406
scaffold150	chr-3	+	459504	33748	439675	70017893	2690303	65030736
scaffold1844	chr-3	-	1339	1151	1317	70017893	923909	43518660
scaffold2106	chr-3	+	66861	3	63578	70017893	11057696	34070998
scaffold1174	chr-3	-	5074	10	5069	70017893	497506	31899202
scaffold556	chr-3	+	196515	4884	142401	70017893	898553	68467808
scaffold526	chr-3	-	546843	17655	517174	70017893	4236324	53093814
scaffold929	chr-3	+	9374	20	1396	70017893	18750872	18752240
scaffold131	chr-3	+	518679	3133	466786	70017893	1764644	64724791
scaffold97	chr-3	+	820300	13104	757690	70017893	6006841	62161728
scaffold1063	chr-3	+	6293	2031	2580	70017893	19342618	19343233
scaffold1104	chr-3	-	5752	5408	5732	70017893	19767426	19767756
scaffold2194	chr-3	-	22793	3306	8048	70017893	19767382	21717230
scaffold1639	chr-3	+	1692	1273	1384	70017893	20087918	20088029
scaffold375	chr-3	+	28504	1380	14954	70017893	545361	45969722
scaffold23	chr-3	+	2100101	5001	2070116	70017893	1014547	65118848
scaffold689	chr-3	+	31539	30174	31505	70017893	19236075	34302194
scaffold1157	chr-3	-	5264	511	2093	70017893	19767371	24682371
scaffold706	chr-3	+	26506	3443	14320	70017893	1234183	52384226
scaffold2095	chr-3	+	81048	22566	25988	70017893	15314260	47231574
scaffold339	chr-3	-	67470	15283	63974	70017893	9036370	24682395
scaffold2379	chr-3	-	5503	2116	2161	70017893	18456566	25858596
scaffold1113	chr-3	-	5682	3748	4171	70017893	22543518	22543927
scaffold2313	chr-3	-	8287	3648	6911	70017893	545347	45969340
scaffold1896	chr-3	-	1253	1	622	70017893	2599284	48837770
scaffold563	chr-3	+	181873	22790	147692	70017893	1730556	42439071
scaffold314	chr-3	+	89104	37966	42910	70017893	23431103	23435969
scaffold632	chr-3	+	51810	13676	26335	70017893	24659577	24662969
scaffold2367	chr-3	-	4033	199	1358	70017893	16323296	53175034
scaffold1411	chr-3	-	2666	876	1728	70017893	24742214	24751339
scaffold1482	chr-3	+	2257	346	2196	70017893	12977849	42715712
scaffold52	chr-3	-	1322917	53513	1282497	70017893	1653496	68715935
scaffold1026	chr-3	-	6958	0	1576	70017893	14844503	47100628
scaffold756	chr-3	-	19958	2918	4686	70017893	1264441	50760961
scaffold2385	chr-3	+	5263	1	415	70017893	3993717	45468002
scaffold2447	chr-3	-	3612	1	2583	70017893	25758184	53667268
scaffold2243	chr-3	-	15068	6430	8298	70017893	26508279	42785292
scaffold891	chr-3	+	11081	5118	7481	70017893	24512313	30251935
scaffold702	chr-3	+	28324	13551	28314	70017893	10056562	41848862
scaffold1159	chr-3	-	5251	3916	5243	70017893	28577176	28616383
scaffold694	chr-3	-	30764	2312	5776	70017893	15171302	39284421
scaffold2291	chr-3	+	9518	514	9490	70017893	24512313	50682225
scaffold218	chr-3	-	232754	9071	215286	70017893	1230825	60143750
scaffold186	chr-3	+	318756	13391	300993	70017893	192814	67763636
scaffold2129	chr-3	-	47695	1771	7104	70017893	32150984	32156708
scaffold295	chr-3	-	109386	15622	22555	70017893	7456840	67507666
scaffold2070	chr-3	+	146224	11427	122847	70017893	13786096	40523081
scaffold2215	chr-3	-	18184	16509	17651	70017893	33018525	33019594
scaffold923	chr-3	-	9522	6887	7737	70017893	7264495	59253082
scaffold1161	chr-3	+	5186	845	983	70017893	26739689	60703068
scaffold653	chr-3	+	40473	1404	40466	70017893	1234533	42934905
scaffold1010	chr-3	+	7282	2412	5640	70017893	20972630	63292486
scaffold1284	chr-3	-	4179	589	1670	70017893	10765116	61254735
scaffold777	chr-3	+	18112	16377	17944	70017893	20083685	65166447
scaffold620	chr-3	-	61592	8170	33558	70017893	9036337	56592428
scaffold1424	chr-3	-	2582	59	191	70017893	37349105	37349238
scaffold6	chr-3	+	3304743	27463	3278008	70017893	1128376	69057140
scaffold915	chr-3	+	9711	3912	9381	70017893	31671197	43079930
scaffold753	chr-3	-	20159	653	4129	70017893	19189646	56895037
scaffold552	chr-3	+	210373	47726	174049	70017893	6406952	44020633
scaffold281	chr-3	+	122942	21117	108097	70017893	4935200	65029442
scaffold1064	chr-3	+	6257	1197	2002	70017893	16597933	63789756
scaffold429	chr-3	+	8209	652	2167	70017893	35196826	42437869
scaffold1203	chr-3	+	4776	896	2525	70017893	35196834	42438033
scaffold431	chr-3	-	8067	4005	6516	70017893	39727248	39729629
scaffold318	chr-3	-	86257	59400	76440	70017893	4884933	56448529
scaffold1093	chr-3	+	5912	3907	4412	70017893	40648399	40648871
scaffold12	chr-3	+	2773434	5098	2730692	70017893	1382218	69057556
scaffold2142	chr-3	+	38998	10040	38570	70017893	18750872	65583502
scaffold164	chr-3	-	409268	50479	399782	70017893	8535009	52204059
scaffold671	chr-3	+	36323	9367	10206	70017893	42222112	42261827
scaffold2218	chr-3	+	18917	5182	18872	70017893	42436649	42439071
scaffold1319	chr-3	+	3904	229	1099	70017893	43298548	43299416
scaffold2604	chr-3	-	1295	1060	1248	70017893	33459603	62161684
scaffold1497	chr-3	-	2161	1430	1652	70017893	27200781	49941660
scaffold1912	chr-3	+	1217	7	1179	70017893	45814712	60881217
scaffold611	chr-3	-	70298	26000	66274	70017893	13800760	64170226
scaffold50	chr-3	+	1361197	46476	1348346	70017893	438289	64961234
scaffold2321	chr-3	+	7955	1605	3017	70017893	47590505	47592042
scaffold1771	chr-3	+	1452	1224	1447	70017893	47830856	47831080
scaffold21	chr-3	+	2150081	3914	2147678	70017893	184900	64831961
scaffold290	chr-3	+	114736	108658	112504	70017893	31217574	62457744
scaffold1463	chr-3	+	2375	73	173	70017893	48642754	48642852
scaffold976	chr-3	-	8665	711	1691	70017893	46185792	51038626
scaffold237	chr-3	+	196524	31527	175908	70017893	16167567	51204385
scaffold2149	chr-3	+	35993	672	18211	70017893	28087371	67509526
scaffold478	chr-3	-	3296	2461	3262	70017893	33459623	62161559
scaffold1022	chr-3	-	7036	207	1962	70017893	49683828	49685557
scaffold416	chr-3	+	9927	1682	1972	70017893	35216019	60626582
scaffold842	chr-3	+	13553	7520	12987	70017893	30058355	67778460
scaffold1966	chr-3	-	1144	1052	1108	70017893	52218625	52218683
scaffold565	chr-3	-	180379	60000	173560	70017893	4645981	64964192
scaffold2419	chr-3	-	4080	2953	4071	70017893	49422549	56681907
scaffold999	chr-3	-	7508	4429	5828	70017893	49422337	56682125
scaffold93	chr-3	+	852307	22660	845077	70017893	3030556	68456423
scaffold1343	chr-3	-	3487	47	1146	70017893	46013233	59757296
scaffold680	chr-3	-	34139	1959	15744	70017893	26499971	61193301
scaffold361	chr-3	-	45332	3893	43968	70017893	29206425	58920182
scaffold2077	chr-3	+	124497	33110	119996	70017893	19652085	66198664
scaffold1158	chr-3	-	5259	716	3956	70017893	31703916	63458520
scaffold2273	chr-3	+	11670	9737	10561	70017893	54980872	54981666
scaffold1940	chr-3	+	1183	13	928	70017893	25574261	64834487
scaffold2341	chr-3	+	7141	3491	5325	70017893	11202662	63413798
scaffold286	chr-3	-	119905	704	104091	70017893	34104221	63375600
scaffold1320	chr-3	+	3837	172	2472	70017893	15452381	57871105
scaffold2565	chr-3	+	1753	812	1734	70017893	50808574	63037526
scaffold1289	chr-3	-	4147	2827	3974	70017893	52055464	67744763
scaffold1637	chr-3	+	1696	579	1081	70017893	58885763	58886328
scaffold358	chr-3	+	49493	8760	31420	70017893	2701402	62429017
scaffold1222	chr-3	-	4630	3003	3156	70017893	59147390	59147543
scaffold2289	chr-3	-	9651	2454	9508	70017893	59519849	59527413
scaffold426	chr-3	+	8601	6927	7279	70017893	60310197	60397236
scaffold1147	chr-3	-	5385	330	690	70017893	60637056	60659973
scaffold827	chr-3	-	15022	7344	8371	70017893	1128376	63995880
scaffold193	chr-3	-	296715	21309	194168	70017893	8653696	67510061
scaffold406	chr-3	+	13147	2048	10474	70017893	59357723	62429017
scaffold2355	chr-3	-	6031	1003	2155	70017893	51796522	65532883
scaffold2118	chr-3	+	53251	441	50490	70017893	26676719	64962426
scaffold1664	chr-3	-	1659	256	1611	70017893	5011094	64834933
scaffold897	chr-3	+	10683	6837	10638	70017893	64953910	64957153
scaffold709	chr-3	+	26182	6747	12366	70017893	64956201	64962383
scaffold2458	chr-3	+	3431	258	1334	70017893	65529856	65530931
scaffold1141	chr-3	+	5424	755	1260	70017893	67305884	67306359
scaffold1585	chr-4	+	1824	947	1628	52414368	544267	4991253
scaffold1253	chr-4	+	4422	4007	4102	52414368	1792075	1792170
scaffold740	chr-4	+	22156	3091	7574	52414368	3062985	21603671
scaffold849	chr-4	+	13193	3666	5598	52414368	3836687	3838269
scaffold2520	chr-4	-	1437	581	1437	52414368	4985121	4986009
scaffold2247	chr-4	-	4510	4213	4371	52414368	5794242	5794400
scaffold948	chr-4	-	9032	1950	7858	52414368	5925614	31636769
scaffold376	chr-4	+	28300	26301	28071	52414368	6265158	6267192
scaffold1254	chr-4	-	4417	753	1496	52414368	6266346	6267132
scaffold567	chr-4	+	165267	3896	14574	52414368	6264667	6271588
scaffold242	chr-4	-	189454	22131	189387	52414368	6265469	45219332
scaffold837	chr-4	+	14244	6552	6892	52414368	8588425	8588767
scaffold1116	chr-4	-	5633	2033	5256	52414368	5460909	27414011
scaffold2197	chr-4	+	22226	1488	3826	52414368	8814575	8816841
scaffold2482	chr-4	+	2900	7	919	52414368	9277909	9279173
scaffold313	chr-4	+	90029	8155	85117	52414368	3881486	49022522
scaffold252	chr-4	+	172042	33357	152860	52414368	10131126	24644069
scaffold363	chr-4	+	41801	454	2402	52414368	9640234	11998627
scaffold387	chr-4	+	21445	12674	21440	52414368	6669355	45075644
scaffold2408	chr-4	-	4573	622	2787	52414368	12214724	12216938
scaffold284	chr-4	-	121194	31437	117023	52414368	12248292	22978081
scaffold287	chr-4	+	119483	1465	107019	52414368	4269942	49974351
scaffold954	chr-4	+	8949	7354	8943	52414368	12956840	12958903
scaffold46	chr-4	-	1425152	5291	1352545	52414368	227772	45219500
scaffold581	chr-4	-	125636	29612	115775	52414368	861083	47638943
scaffold1153	chr-4	+	5330	1729	1880	52414368	14557168	14557319
scaffold2293	chr-4	-	9392	7703	9004	52414368	16408734	16410160
scaffold1984	chr-4	-	1113	282	1096	52414368	16448614	16453765
scaffold1789	chr-4	+	1426	9	1388	52414368	16458191	16459638
scaffold2013	chr-4	+	1061	35	944	52414368	17230828	17231741
scaffold1472	chr-4	-	2321	2102	2194	52414368	17341677	17341769
scaffold2279	chr-4	+	11064	3	10204	52414368	12711058	38152598
scaffold701	chr-4	+	28635	2518	3724	52414368	7117626	35945063
scaffold1772	chr-4	+	1450	1304	1371	52414368	18903067	18903134
scaffold2621	chr-4	+	1094	9	93	52414368	18971086	18971170
scaffold1751	chr-4	-	1475	156	499	52414368	19833221	19833514
scaffold392	chr-4	+	17819	110	1369	52414368	20121185	20122470
scaffold900	chr-4	+	10381	367	1195	52414368	20121632	20122576
scaffold1972	chr-4	+	1132	38	344	52414368	20122368	20122682
scaffold2593	chr-4	+	1392	37	354	52414368	20122368	20122694
scaffold1621	chr-4	-	1729	3	285	52414368	20122409	20122694
scaffold1813	chr-4	-	1389	9	73	52414368	20122630	20122694
scaffold326	chr-4	+	79183	37	30745	52414368	2961168	41082022
scaffold212	chr-4	-	250797	116184	218871	52414368	6264970	49892591
scaffold34	chr-4	+	1662429	38412	1631304	52414368	2997751	51458928
scaffold634	chr-4	+	51031	5970	49252	52414368	6265324	37392535
scaffold2084	chr-4	-	104175	36295	70617	52414368	9046560	49023234
scaffold2023	chr-4	-	1045	952	1026	52414368	12745034	33079353
scaffold115	chr-4	+	671005	6353	641580	52414368	559075	46111195
scaffold691	chr-4	+	31475	1779	8404	52414368	23691125	31615275
scaffold759	chr-4	+	19788	321	5114	52414368	7338769	43649570
scaffold801	chr-4	+	16694	451	532	52414368	24147811	24147888
scaffold1056	chr-4	+	6395	2341	5114	52414368	24799821	24803486
scaffold1198	chr-4	-	4798	4567	4789	52414368	16410016	34402145
scaffold839	chr-4	-	13797	10289	12537	52414368	12720609	37052033
scaffold1208	chr-4	-	4758	2740	4609	52414368	14108631	38424129
scaffold65	chr-4	+	1183276	12989	1064490	52414368	454564	50551690
scaffold2428	chr-4	-	4037	1843	3856	52414368	5191534	49890479
scaffold96	chr-4	+	820494	9678	811364	52414368	4704932	49342124
scaffold2472	chr-4	+	3084	1037	1766	52414368	27595529	27596258
scaffold1207	chr-4	-	4759	146	1067	52414368	27969452	27970490
scaffold613	chr-4	+	67189	4411	47245	52414368	16336789	48318723
scaffold696	chr-4	+	30437	22984	29089	52414368	18470094	30271574
scaffold778	chr-4	+	17883	2862	5423	52414368	28316535	28318864
scaffold310	chr-4	+	94359	3140	27940	52414368	6264667	48990600
scaffold727	chr-4	-	23771	2442	6195	52414368	29270942	42422309
scaffold661	chr-4	-	38485	16	13070	52414368	27805140	44588910
scaffold1131	chr-4	-	5492	1228	2822	52414368	29781765	29783348
scaffold258	chr-4	+	164318	144	110517	52414368	5003436	52025809
scaffold2167	chr-4	-	29443	22455	22707	52414368	31218930	31219183
scaffold296	chr-4	+	108210	1990	106478	52414368	14194681	35995143
scaffold1167	chr-4	+	5153	812	1688	52414368	31615195	31616327
scaffold1616	chr-4	-	1738	180	403	52414368	32009081	32009317
scaffold2187	chr-4	+	25061	5220	16376	52414368	31236048	46514111
scaffold933	chr-4	-	9292	5562	6647	52414368	32601287	32618654
scaffold850	chr-4	+	13049	4731	13049	52414368	9486711	45366440
scaffold301	chr-4	-	103343	24796	52214	52414368	12449479	49708213
scaffold1855	chr-4	-	1319	962	1254	52414368	15775284	49287074
scaffold991	chr-4	+	8014	6128	7541	52414368	26026290	51933269
scaffold1671	chr-4	+	1638	63	707	52414368	31615195	34402284
scaffold858	chr-4	+	12708	361	1868	52414368	34260699	34262052
scaffold149	chr-4	+	459601	16398	449581	52414368	18903384	47696093
scaffold1470	chr-4	+	2336	63	995	52414368	35428735	35429709
scaffold1311	chr-4	+	3959	5	3450	52414368	16342640	46396177
scaffold1186	chr-4	+	4923	3613	3933	52414368	37532317	37632773
scaffold720	chr-4	+	24553	1057	24211	52414368	29243809	50551658
scaffold2073	chr-4	-	131768	7952	96691	52414368	29938753	50522933
scaffold745	chr-4	+	21311	7199	9637	52414368	36204722	42421620
scaffold1420	chr-4	-	2602	5	613	52414368	33102010	48042959
scaffold1689	chr-4	-	1591	139	302	52414368	40448765	40448943
scaffold1349	chr-4	+	3346	2471	3337	52414368	41290400	41291396
scaffold2609	chr-4	+	1218	341	582	52414368	41719532	42486977
scaffold1832	chr-4	-	1356	37	1148	52414368	42152487	42166084
scaffold2317	chr-4	+	8136	7232	7802	52414368	42512478	42513058
scaffold2452	chr-4	-	1677	0	187	52414368	38151062	51222087
scaffold165	chr-4	+	404258	675	377748	52414368	3814814	49940520
scaffold566	chr-4	+	176515	24904	160786	52414368	8878133	49890784
scaffold817	chr-4	-	16061	2573	6158	52414368	44778551	44782011
scaffold1602	chr-4	-	1774	1496	1744	52414368	45121562	45121811
scaffold73	chr-4	+	1077338	14562	1035277	52414368	1501491	50332017
scaffold1955	chr-4	-	1161	282	903	52414368	46235511	46236123
scaffold331	chr-4	-	75321	35814	75132	52414368	15850468	50552444
scaffold785	chr-4	-	17255	9187	9443	52414368	46382591	46382846
scaffold1292	chr-4	+	4124	2465	2712	52414368	46382600	46382846
scaffold2436	chr-4	+	3815	2266	2513	52414368	46382600	46382846
scaffold1958	chr-4	-	1158	12	170	52414368	42422200	50552583
scaffold2347	chr-4	+	6960	4524	6015	52414368	46302705	47367667
scaffold1658	chr-4	+	1665	26	340	52414368	48939323	48939637
scaffold591	chr-4	-	109112	42176	97657	52414368	13527921	51458926
scaffold2303	chr-4	-	8897	3057	5920	52414368	49888486	49892587
scaffold2212	chr-4	+	20095	4690	8960	52414368	12361355	51350967
scaffold877	chr-4	+	11576	10488	11576	52414368	48674593	52404266
scaffold372	chr-5	-	32307	1	2967	43941197	67926	108657
scaffold1970	chr-5	-	1139	79	202	43941197	77027	99555
scaffold2386	chr-5	+	5256	1850	3634	43941197	85100	215328
scaffold225	chr-5	-	216624	62326	208224	43941197	60973	24439494
scaffold2512	chr-5	-	2372	652	1313	43941197	1346350	1347104
scaffold1192	chr-5	+	4857	3264	3566	43941197	2414957	2415260
scaffold1500	chr-5	+	2150	1467	2080	43941197	2823526	2824386
scaffold517	chr-5	+	1198	367	666	43941197	2981553	2981880
scaffold389	None	+	19892	na	na	na	na	na
scaffold404	None	+	13491	na	na	na	na	na
scaffold420	None	+	1811	na	na	na	na	na
scaffold423	None	+	9052	na	na	na	na	na
scaffold425	None	+	9002	na	na	na	na	na
scaffold428	None	+	8500	na	na	na	na	na
scaffold438	None	+	7103	na	na	na	na	na
scaffold441	None	+	6296	na	na	na	na	na
scaffold444	None	+	5978	na	na	na	na	na
scaffold445	None	+	5959	na	na	na	na	na
scaffold452	None	+	5624	na	na	na	na	na
scaffold453	None	+	5584	na	na	na	na	na
scaffold454	None	+	5570	na	na	na	na	na
scaffold456	None	+	5452	na	na	na	na	na
scaffold458	None	+	5335	na	na	na	na	na
scaffold460	None	+	5271	na	na	na	na	na
scaffold468	None	+	4451	na	na	na	na	na
scaffold471	None	+	4357	na	na	na	na	na
scaffold474	None	+	4154	na	na	na	na	na
scaffold477	None	+	3554	na	na	na	na	na
scaffold479	None	+	3074	na	na	na	na	na
scaffold480	None	+	3029	na	na	na	na	na
scaffold483	None	+	2529	na	na	na	na	na
scaffold486	None	+	2431	na	na	na	na	na
scaffold487	None	+	2397	na	na	na	na	na
scaffold488	None	+	2387	na	na	na	na	na
scaffold489	None	+	2325	na	na	na	na	na
scaffold491	None	+	2135	na	na	na	na	na
scaffold492	None	+	1943	na	na	na	na	na
scaffold493	None	+	1922	na	na	na	na	na
scaffold495	None	+	1874	na	na	na	na	na
scaffold500	None	+	1716	na	na	na	na	na
scaffold505	None	+	1547	na	na	na	na	na
scaffold506	None	+	1546	na	na	na	na	na
scaffold509	None	+	1501	na	na	na	na	na
scaffold515	None	+	1210	na	na	na	na	na
scaffold516	None	+	1207	na	na	na	na	na
scaffold518	None	+	1183	na	na	na	na	na
scaffold522	None	+	1071	na	na	na	na	na
scaffold523	None	+	1028	na	na	na	na	na
scaffold524	None	+	2174469	na	na	na	na	na
scaffold551	None	+	212430	na	na	na	na	na
scaffold658	None	+	39075	na	na	na	na	na
scaffold704	None	+	26690	na	na	na	na	na
scaffold722	None	+	24436	na	na	na	na	na
scaffold723	None	+	24217	na	na	na	na	na
scaffold751	None	+	20325	na	na	na	na	na
scaffold762	None	+	19583	na	na	na	na	na
scaffold786	None	+	17249	na	na	na	na	na
scaffold805	None	+	16548	na	na	na	na	na
scaffold809	None	+	16318	na	na	na	na	na
scaffold829	None	+	14964	na	na	na	na	na
scaffold831	None	+	14710	na	na	na	na	na
scaffold856	None	+	12729	na	na	na	na	na
scaffold888	None	+	11146	na	na	na	na	na
scaffold894	None	+	10950	na	na	na	na	na
scaffold904	None	+	10083	na	na	na	na	na
scaffold906	None	+	10042	na	na	na	na	na
scaffold911	None	+	9852	na	na	na	na	na
scaffold913	None	+	9799	na	na	na	na	na
scaffold922	None	+	9545	na	na	na	na	na
scaffold925	None	+	9491	na	na	na	na	na
scaffold928	None	+	9390	na	na	na	na	na
scaffold940	None	+	9145	na	na	na	na	na
scaffold943	None	+	9079	na	na	na	na	na
scaffold952	None	+	8961	na	na	na	na	na
scaffold957	None	+	8936	na	na	na	na	na
scaffold973	None	+	8747	na	na	na	na	na
scaffold979	None	+	8484	na	na	na	na	na
scaffold984	None	+	8348	na	na	na	na	na
scaffold985	None	+	8311	na	na	na	na	na
scaffold992	None	+	7919	na	na	na	na	na
scaffold1004	None	+	7399	na	na	na	na	na
scaffold1008	None	+	7348	na	na	na	na	na
scaffold1012	None	+	7272	na	na	na	na	na
scaffold1025	None	+	6974	na	na	na	na	na
scaffold1029	None	+	6896	na	na	na	na	na
scaffold1043	None	+	6557	na	na	na	na	na
scaffold1047	None	+	6535	na	na	na	na	na
scaffold1066	None	+	6204	na	na	na	na	na
scaffold1073	None	+	6080	na	na	na	na	na
scaffold1075	None	+	6064	na	na	na	na	na
scaffold1077	None	+	6051	na	na	na	na	na
scaffold1078	None	+	6045	na	na	na	na	na
scaffold1085	None	+	5954	na	na	na	na	na
scaffold1091	None	+	5920	na	na	na	na	na
scaffold1092	None	+	5919	na	na	na	na	na
scaffold1094	None	+	5906	na	na	na	na	na
scaffold1103	None	+	5792	na	na	na	na	na
scaffold1105	None	+	5745	na	na	na	na	na
scaffold1114	None	+	5677	na	na	na	na	na
scaffold1122	None	+	5551	na	na	na	na	na
scaffold1124	None	+	5528	na	na	na	na	na
scaffold1129	None	+	5512	na	na	na	na	na
scaffold1130	None	+	5511	na	na	na	na	na
scaffold1135	None	+	5468	na	na	na	na	na
scaffold1143	None	+	5413	na	na	na	na	na
scaffold1148	None	+	5380	na	na	na	na	na
scaffold1152	None	+	5331	na	na	na	na	na
scaffold1154	None	+	5293	na	na	na	na	na
scaffold1160	None	+	5204	na	na	na	na	na
scaffold1164	None	+	5160	na	na	na	na	na
scaffold1169	None	+	5110	na	na	na	na	na
scaffold1173	None	+	5082	na	na	na	na	na
scaffold1178	None	+	5040	na	na	na	na	na
scaffold1180	None	+	5010	na	na	na	na	na
scaffold1183	None	+	4949	na	na	na	na	na
scaffold1187	None	+	4884	na	na	na	na	na
scaffold1190	None	+	4867	na	na	na	na	na
scaffold1193	None	+	4847	na	na	na	na	na
scaffold1195	None	+	4830	na	na	na	na	na
scaffold1202	None	+	4784	na	na	na	na	na
scaffold1204	None	+	4764	na	na	na	na	na
scaffold1209	None	+	4749	na	na	na	na	na
scaffold1211	None	+	4716	na	na	na	na	na
scaffold1227	None	+	4583	na	na	na	na	na
scaffold1228	None	+	4582	na	na	na	na	na
scaffold1231	None	+	4560	na	na	na	na	na
scaffold1232	None	+	4559	na	na	na	na	na
scaffold1233	None	+	4551	na	na	na	na	na
scaffold1234	None	+	4543	na	na	na	na	na
scaffold1238	None	+	4512	na	na	na	na	na
scaffold1240	None	+	4507	na	na	na	na	na
scaffold1241	None	+	4504	na	na	na	na	na
scaffold1242	None	+	4498	na	na	na	na	na
scaffold1247	None	+	4463	na	na	na	na	na
scaffold1248	None	+	4462	na	na	na	na	na
scaffold1251	None	+	4434	na	na	na	na	na
scaffold1252	None	+	4422	na	na	na	na	na
scaffold1260	None	+	4329	na	na	na	na	na
scaffold1261	None	+	4323	na	na	na	na	na
scaffold1267	None	+	4279	na	na	na	na	na
scaffold1286	None	+	4164	na	na	na	na	na
scaffold1301	None	+	4070	na	na	na	na	na
scaffold1302	None	+	4057	na	na	na	na	na
scaffold1303	None	+	4047	na	na	na	na	na
scaffold1304	None	+	4041	na	na	na	na	na
scaffold1309	None	+	3972	na	na	na	na	na
scaffold1312	None	+	3951	na	na	na	na	na
scaffold1315	None	+	3934	na	na	na	na	na
scaffold1316	None	+	3926	na	na	na	na	na
scaffold1332	None	+	3748	na	na	na	na	na
scaffold1333	None	+	3732	na	na	na	na	na
scaffold1336	None	+	3645	na	na	na	na	na
scaffold1337	None	+	3627	na	na	na	na	na
scaffold1339	None	+	3569	na	na	na	na	na
scaffold1340	None	+	3550	na	na	na	na	na
scaffold1341	None	+	3527	na	na	na	na	na
scaffold1342	None	+	3527	na	na	na	na	na
scaffold1344	None	+	3482	na	na	na	na	na
scaffold1345	None	+	3411	na	na	na	na	na
scaffold1346	None	+	3390	na	na	na	na	na
scaffold1347	None	+	3371	na	na	na	na	na
scaffold1350	None	+	3271	na	na	na	na	na
scaffold1353	None	+	3239	na	na	na	na	na
scaffold1355	None	+	3219	na	na	na	na	na
scaffold1361	None	+	3138	na	na	na	na	na
scaffold1362	None	+	3127	na	na	na	na	na
scaffold1364	None	+	3088	na	na	na	na	na
scaffold1365	None	+	3059	na	na	na	na	na
scaffold1366	None	+	3042	na	na	na	na	na
scaffold1368	None	+	2999	na	na	na	na	na
scaffold1370	None	+	2956	na	na	na	na	na
scaffold1371	None	+	2940	na	na	na	na	na
scaffold1374	None	+	2930	na	na	na	na	na
scaffold1377	None	+	2914	na	na	na	na	na
scaffold1378	None	+	2904	na	na	na	na	na
scaffold1379	None	+	2893	na	na	na	na	na
scaffold1381	None	+	2883	na	na	na	na	na
scaffold1383	None	+	2875	na	na	na	na	na
scaffold1386	None	+	2842	na	na	na	na	na
scaffold1387	None	+	2838	na	na	na	na	na
scaffold1388	None	+	2826	na	na	na	na	na
scaffold1390	None	+	2810	na	na	na	na	na
scaffold1391	None	+	2809	na	na	na	na	na
scaffold1394	None	+	2783	na	na	na	na	na
scaffold1397	None	+	2756	na	na	na	na	na
scaffold1399	None	+	2735	na	na	na	na	na
scaffold1402	None	+	2721	na	na	na	na	na
scaffold1405	None	+	2707	na	na	na	na	na
scaffold1407	None	+	2692	na	na	na	na	na
scaffold1408	None	+	2682	na	na	na	na	na
scaffold1409	None	+	2676	na	na	na	na	na
scaffold1410	None	+	2666	na	na	na	na	na
scaffold1412	None	+	2654	na	na	na	na	na
scaffold1413	None	+	2642	na	na	na	na	na
scaffold1416	None	+	2627	na	na	na	na	na
scaffold1417	None	+	2621	na	na	na	na	na
scaffold1418	None	+	2615	na	na	na	na	na
scaffold1421	None	+	2600	na	na	na	na	na
scaffold1422	None	+	2593	na	na	na	na	na
scaffold1425	None	+	2582	na	na	na	na	na
scaffold1427	None	+	2550	na	na	na	na	na
scaffold1428	None	+	2548	na	na	na	na	na
scaffold1429	None	+	2542	na	na	na	na	na
scaffold1430	None	+	2531	na	na	na	na	na
scaffold1432	None	+	2518	na	na	na	na	na
scaffold1433	None	+	2511	na	na	na	na	na
scaffold1435	None	+	2503	na	na	na	na	na
scaffold1436	None	+	2501	na	na	na	na	na
scaffold1437	None	+	2500	na	na	na	na	na
scaffold1438	None	+	2482	na	na	na	na	na
scaffold1439	None	+	2480	na	na	na	na	na
scaffold1440	None	+	2471	na	na	na	na	na
scaffold1441	None	+	2465	na	na	na	na	na
scaffold1443	None	+	2455	na	na	na	na	na
scaffold1444	None	+	2445	na	na	na	na	na
scaffold1445	None	+	2441	na	na	na	na	na
scaffold1446	None	+	2428	na	na	na	na	na
scaffold1447	None	+	2425	na	na	na	na	na
scaffold1448	None	+	2425	na	na	na	na	na
scaffold1449	None	+	2424	na	na	na	na	na
scaffold1452	None	+	2412	na	na	na	na	na
scaffold1454	None	+	2403	na	na	na	na	na
scaffold1455	None	+	2403	na	na	na	na	na
scaffold1456	None	+	2393	na	na	na	na	na
scaffold1458	None	+	2391	na	na	na	na	na
scaffold1459	None	+	2384	na	na	na	na	na
scaffold1464	None	+	2355	na	na	na	na	na
scaffold1465	None	+	2349	na	na	na	na	na
scaffold1466	None	+	2347	na	na	na	na	na
scaffold1467	None	+	2347	na	na	na	na	na
scaffold1468	None	+	2341	na	na	na	na	na
scaffold1469	None	+	2341	na	na	na	na	na
scaffold1471	None	+	2335	na	na	na	na	na
scaffold1473	None	+	2314	na	na	na	na	na
scaffold1474	None	+	2313	na	na	na	na	na
scaffold1475	None	+	2293	na	na	na	na	na
scaffold1477	None	+	2289	na	na	na	na	na
scaffold1479	None	+	2281	na	na	na	na	na
scaffold1481	None	+	2265	na	na	na	na	na
scaffold1485	None	+	2232	na	na	na	na	na
scaffold1486	None	+	2229	na	na	na	na	na
scaffold1488	None	+	2217	na	na	na	na	na
scaffold1489	None	+	2212	na	na	na	na	na
scaffold1491	None	+	2182	na	na	na	na	na
scaffold1493	None	+	2169	na	na	na	na	na
scaffold1495	None	+	2166	na	na	na	na	na
scaffold1496	None	+	2165	na	na	na	na	na
scaffold1502	None	+	2142	na	na	na	na	na
scaffold1504	None	+	2134	na	na	na	na	na
scaffold1507	None	+	2123	na	na	na	na	na
scaffold1508	None	+	2118	na	na	na	na	na
scaffold1509	None	+	2117	na	na	na	na	na
scaffold1512	None	+	2110	na	na	na	na	na
scaffold1513	None	+	2103	na	na	na	na	na
scaffold1514	None	+	2101	na	na	na	na	na
scaffold1517	None	+	2087	na	na	na	na	na
scaffold1518	None	+	2077	na	na	na	na	na
scaffold1519	None	+	2071	na	na	na	na	na
scaffold1523	None	+	2050	na	na	na	na	na
scaffold1524	None	+	2043	na	na	na	na	na
scaffold1525	None	+	2040	na	na	na	na	na
scaffold1527	None	+	2036	na	na	na	na	na
scaffold1528	None	+	2032	na	na	na	na	na
scaffold1529	None	+	2028	na	na	na	na	na
scaffold1530	None	+	2024	na	na	na	na	na
scaffold1531	None	+	2023	na	na	na	na	na
scaffold1532	None	+	2016	na	na	na	na	na
scaffold1536	None	+	2008	na	na	na	na	na
scaffold1537	None	+	2005	na	na	na	na	na
scaffold1541	None	+	1993	na	na	na	na	na
scaffold1545	None	+	1976	na	na	na	na	na
scaffold1546	None	+	1954	na	na	na	na	na
scaffold1552	None	+	1936	na	na	na	na	na
scaffold1553	None	+	1936	na	na	na	na	na
scaffold1554	None	+	1933	na	na	na	na	na
scaffold1556	None	+	1919	na	na	na	na	na
scaffold1560	None	+	1911	na	na	na	na	na
scaffold1562	None	+	1909	na	na	na	na	na
scaffold1564	None	+	1905	na	na	na	na	na
scaffold1565	None	+	1903	na	na	na	na	na
scaffold1567	None	+	1900	na	na	na	na	na
scaffold1568	None	+	1897	na	na	na	na	na
scaffold1573	None	+	1872	na	na	na	na	na
scaffold1574	None	+	1869	na	na	na	na	na
scaffold1575	None	+	1865	na	na	na	na	na
scaffold1578	None	+	1856	na	na	na	na	na
scaffold1579	None	+	1851	na	na	na	na	na
scaffold1581	None	+	1838	na	na	na	na	na
scaffold1582	None	+	1833	na	na	na	na	na
scaffold1587	None	+	1818	na	na	na	na	na
scaffold1588	None	+	1814	na	na	na	na	na
scaffold1589	None	+	1812	na	na	na	na	na
scaffold1590	None	+	1810	na	na	na	na	na
scaffold1591	None	+	1805	na	na	na	na	na
scaffold1592	None	+	1805	na	na	na	na	na
scaffold1593	None	+	1804	na	na	na	na	na
scaffold1594	None	+	1803	na	na	na	na	na
scaffold1595	None	+	1798	na	na	na	na	na
scaffold1600	None	+	1781	na	na	na	na	na
scaffold1603	None	+	1770	na	na	na	na	na
scaffold1604	None	+	1770	na	na	na	na	na
scaffold1605	None	+	1767	na	na	na	na	na
scaffold1606	None	+	1764	na	na	na	na	na
scaffold1607	None	+	1762	na	na	na	na	na
scaffold1608	None	+	1760	na	na	na	na	na
scaffold1609	None	+	1759	na	na	na	na	na
scaffold1610	None	+	1756	na	na	na	na	na
scaffold1613	None	+	1753	na	na	na	na	na
scaffold1614	None	+	1753	na	na	na	na	na
scaffold1615	None	+	1750	na	na	na	na	na
scaffold1619	None	+	1735	na	na	na	na	na
scaffold1620	None	+	1735	na	na	na	na	na
scaffold1622	None	+	1728	na	na	na	na	na
scaffold1624	None	+	1727	na	na	na	na	na
scaffold1625	None	+	1719	na	na	na	na	na
scaffold1626	None	+	1717	na	na	na	na	na
scaffold1628	None	+	1715	na	na	na	na	na
scaffold1629	None	+	1714	na	na	na	na	na
scaffold1632	None	+	1710	na	na	na	na	na
scaffold1634	None	+	1708	na	na	na	na	na
scaffold1635	None	+	1708	na	na	na	na	na
scaffold1636	None	+	1705	na	na	na	na	na
scaffold1638	None	+	1694	na	na	na	na	na
scaffold1641	None	+	1690	na	na	na	na	na
scaffold1642	None	+	1687	na	na	na	na	na
scaffold1643	None	+	1686	na	na	na	na	na
scaffold1644	None	+	1685	na	na	na	na	na
scaffold1647	None	+	1681	na	na	na	na	na
scaffold1652	None	+	1671	na	na	na	na	na
scaffold1655	None	+	1667	na	na	na	na	na
scaffold1657	None	+	1665	na	na	na	na	na
scaffold1659	None	+	1664	na	na	na	na	na
scaffold1660	None	+	1663	na	na	na	na	na
scaffold1661	None	+	1662	na	na	na	na	na
scaffold1663	None	+	1659	na	na	na	na	na
scaffold1666	None	+	1653	na	na	na	na	na
scaffold1667	None	+	1650	na	na	na	na	na
scaffold1668	None	+	1649	na	na	na	na	na
scaffold1669	None	+	1648	na	na	na	na	na
scaffold1673	None	+	1636	na	na	na	na	na
scaffold1675	None	+	1633	na	na	na	na	na
scaffold1676	None	+	1633	na	na	na	na	na
scaffold1677	None	+	1629	na	na	na	na	na
scaffold1680	None	+	1613	na	na	na	na	na
scaffold1681	None	+	1611	na	na	na	na	na
scaffold1682	None	+	1610	na	na	na	na	na
scaffold1683	None	+	1606	na	na	na	na	na
scaffold1685	None	+	1598	na	na	na	na	na
scaffold1688	None	+	1592	na	na	na	na	na
scaffold1690	None	+	1583	na	na	na	na	na
scaffold1694	None	+	1580	na	na	na	na	na
scaffold1697	None	+	1575	na	na	na	na	na
scaffold1699	None	+	1573	na	na	na	na	na
scaffold1700	None	+	1566	na	na	na	na	na
scaffold1701	None	+	1566	na	na	na	na	na
scaffold1702	None	+	1565	na	na	na	na	na
scaffold1704	None	+	1564	na	na	na	na	na
scaffold1706	None	+	1562	na	na	na	na	na
scaffold1707	None	+	1557	na	na	na	na	na
scaffold1708	None	+	1556	na	na	na	na	na
scaffold1710	None	+	1551	na	na	na	na	na
scaffold1711	None	+	1550	na	na	na	na	na
scaffold1712	None	+	1549	na	na	na	na	na
scaffold1714	None	+	1548	na	na	na	na	na
scaffold1715	None	+	1547	na	na	na	na	na
scaffold1716	None	+	1546	na	na	na	na	na
scaffold1717	None	+	1543	na	na	na	na	na
scaffold1718	None	+	1542	na	na	na	na	na
scaffold1719	None	+	1539	na	na	na	na	na
scaffold1721	None	+	1537	na	na	na	na	na
scaffold1723	None	+	1527	na	na	na	na	na
scaffold1724	None	+	1526	na	na	na	na	na
scaffold1726	None	+	1523	na	na	na	na	na
scaffold1732	None	+	1515	na	na	na	na	na
scaffold1733	None	+	1515	na	na	na	na	na
scaffold1735	None	+	1506	na	na	na	na	na
scaffold1736	None	+	1506	na	na	na	na	na
scaffold1738	None	+	1500	na	na	na	na	na
scaffold1740	None	+	1496	na	na	na	na	na
scaffold1742	None	+	1494	na	na	na	na	na
scaffold1744	None	+	1488	na	na	na	na	na
scaffold1746	None	+	1482	na	na	na	na	na
scaffold1747	None	+	1482	na	na	na	na	na
scaffold1748	None	+	1479	na	na	na	na	na
scaffold1750	None	+	1476	na	na	na	na	na
scaffold1752	None	+	1474	na	na	na	na	na
scaffold1753	None	+	1474	na	na	na	na	na
scaffold1755	None	+	1471	na	na	na	na	na
scaffold1756	None	+	1470	na	na	na	na	na
scaffold1758	None	+	1470	na	na	na	na	na
scaffold1759	None	+	1468	na	na	na	na	na
scaffold1763	None	+	1466	na	na	na	na	na
scaffold1765	None	+	1462	na	na	na	na	na
scaffold1766	None	+	1460	na	na	na	na	na
scaffold1770	None	+	1455	na	na	na	na	na
scaffold1773	None	+	1450	na	na	na	na	na
scaffold1775	None	+	1448	na	na	na	na	na
scaffold1778	None	+	1445	na	na	na	na	na
scaffold1779	None	+	1444	na	na	na	na	na
scaffold1780	None	+	1443	na	na	na	na	na
scaffold1781	None	+	1442	na	na	na	na	na
scaffold1782	None	+	1439	na	na	na	na	na
scaffold1783	None	+	1437	na	na	na	na	na
scaffold1784	None	+	1436	na	na	na	na	na
scaffold1786	None	+	1433	na	na	na	na	na
scaffold1787	None	+	1428	na	na	na	na	na
scaffold1788	None	+	1426	na	na	na	na	na
scaffold1793	None	+	1423	na	na	na	na	na
scaffold1794	None	+	1421	na	na	na	na	na
scaffold1796	None	+	1420	na	na	na	na	na
scaffold1801	None	+	1414	na	na	na	na	na
scaffold1803	None	+	1407	na	na	na	na	na
scaffold1805	None	+	1404	na	na	na	na	na
scaffold1807	None	+	1399	na	na	na	na	na
scaffold1808	None	+	1399	na	na	na	na	na
scaffold1809	None	+	1396	na	na	na	na	na
scaffold1810	None	+	1394	na	na	na	na	na
scaffold1814	None	+	1388	na	na	na	na	na
scaffold1816	None	+	1386	na	na	na	na	na
scaffold1819	None	+	1379	na	na	na	na	na
scaffold1821	None	+	1372	na	na	na	na	na
scaffold1822	None	+	1371	na	na	na	na	na
scaffold1823	None	+	1369	na	na	na	na	na
scaffold1825	None	+	1365	na	na	na	na	na
scaffold1827	None	+	1365	na	na	na	na	na
scaffold1828	None	+	1362	na	na	na	na	na
scaffold1829	None	+	1361	na	na	na	na	na
scaffold1830	None	+	1358	na	na	na	na	na
scaffold1833	None	+	1356	na	na	na	na	na
scaffold1836	None	+	1353	na	na	na	na	na
scaffold1837	None	+	1351	na	na	na	na	na
scaffold1841	None	+	1342	na	na	na	na	na
scaffold1842	None	+	1342	na	na	na	na	na
scaffold1843	None	+	1340	na	na	na	na	na
scaffold1846	None	+	1337	na	na	na	na	na
scaffold1847	None	+	1336	na	na	na	na	na
scaffold1849	None	+	1334	na	na	na	na	na
scaffold1851	None	+	1332	na	na	na	na	na
scaffold1852	None	+	1331	na	na	na	na	na
scaffold1853	None	+	1331	na	na	na	na	na
scaffold1854	None	+	1324	na	na	na	na	na
scaffold1856	None	+	1317	na	na	na	na	na
scaffold1857	None	+	1316	na	na	na	na	na
scaffold1862	None	+	1307	na	na	na	na	na
scaffold1863	None	+	1307	na	na	na	na	na
scaffold1864	None	+	1306	na	na	na	na	na
scaffold1865	None	+	1303	na	na	na	na	na
scaffold1866	None	+	1303	na	na	na	na	na
scaffold1867	None	+	1302	na	na	na	na	na
scaffold1868	None	+	1302	na	na	na	na	na
scaffold1871	None	+	1300	na	na	na	na	na
scaffold1873	None	+	1298	na	na	na	na	na
scaffold1874	None	+	1294	na	na	na	na	na
scaffold1875	None	+	1292	na	na	na	na	na
scaffold1876	None	+	1290	na	na	na	na	na
scaffold1877	None	+	1287	na	na	na	na	na
scaffold1880	None	+	1285	na	na	na	na	na
scaffold1881	None	+	1284	na	na	na	na	na
scaffold1882	None	+	1280	na	na	na	na	na
scaffold1884	None	+	1273	na	na	na	na	na
scaffold1885	None	+	1273	na	na	na	na	na
scaffold1886	None	+	1273	na	na	na	na	na
scaffold1887	None	+	1272	na	na	na	na	na
scaffold1888	None	+	1271	na	na	na	na	na
scaffold1889	None	+	1269	na	na	na	na	na
scaffold1890	None	+	1265	na	na	na	na	na
scaffold1891	None	+	1265	na	na	na	na	na
scaffold1893	None	+	1262	na	na	na	na	na
scaffold1895	None	+	1256	na	na	na	na	na
scaffold1898	None	+	1251	na	na	na	na	na
scaffold1900	None	+	1242	na	na	na	na	na
scaffold1901	None	+	1241	na	na	na	na	na
scaffold1902	None	+	1240	na	na	na	na	na
scaffold1905	None	+	1234	na	na	na	na	na
scaffold1906	None	+	1227	na	na	na	na	na
scaffold1907	None	+	1227	na	na	na	na	na
scaffold1910	None	+	1221	na	na	na	na	na
scaffold1911	None	+	1220	na	na	na	na	na
scaffold1914	None	+	1213	na	na	na	na	na
scaffold1915	None	+	1213	na	na	na	na	na
scaffold1916	None	+	1211	na	na	na	na	na
scaffold1918	None	+	1208	na	na	na	na	na
scaffold1919	None	+	1208	na	na	na	na	na
scaffold1920	None	+	1207	na	na	na	na	na
scaffold1921	None	+	1206	na	na	na	na	na
scaffold1926	None	+	1202	na	na	na	na	na
scaffold1927	None	+	1202	na	na	na	na	na
scaffold1929	None	+	1200	na	na	na	na	na
scaffold1930	None	+	1193	na	na	na	na	na
scaffold1933	None	+	1189	na	na	na	na	na
scaffold1935	None	+	1187	na	na	na	na	na
scaffold1936	None	+	1187	na	na	na	na	na
scaffold1942	None	+	1180	na	na	na	na	na
scaffold1943	None	+	1180	na	na	na	na	na
scaffold1945	None	+	1176	na	na	na	na	na
scaffold1946	None	+	1175	na	na	na	na	na
scaffold1948	None	+	1174	na	na	na	na	na
scaffold1949	None	+	1174	na	na	na	na	na
scaffold1950	None	+	1174	na	na	na	na	na
scaffold1951	None	+	1171	na	na	na	na	na
scaffold1953	None	+	1168	na	na	na	na	na
scaffold1954	None	+	1165	na	na	na	na	na
scaffold1956	None	+	1161	na	na	na	na	na
scaffold1959	None	+	1158	na	na	na	na	na
scaffold1962	None	+	1153	na	na	na	na	na
scaffold1964	None	+	1150	na	na	na	na	na
scaffold1965	None	+	1149	na	na	na	na	na
scaffold1967	None	+	1144	na	na	na	na	na
scaffold1968	None	+	1141	na	na	na	na	na
scaffold1971	None	+	1137	na	na	na	na	na
scaffold1973	None	+	1131	na	na	na	na	na
scaffold1974	None	+	1128	na	na	na	na	na
scaffold1975	None	+	1128	na	na	na	na	na
scaffold1978	None	+	1127	na	na	na	na	na
scaffold1979	None	+	1125	na	na	na	na	na
scaffold1981	None	+	1114	na	na	na	na	na
scaffold1983	None	+	1114	na	na	na	na	na
scaffold1985	None	+	1112	na	na	na	na	na
scaffold1988	None	+	1109	na	na	na	na	na
scaffold1989	None	+	1109	na	na	na	na	na
scaffold1990	None	+	1108	na	na	na	na	na
scaffold1991	None	+	1107	na	na	na	na	na
scaffold1994	None	+	1104	na	na	na	na	na
scaffold1996	None	+	1099	na	na	na	na	na
scaffold1997	None	+	1099	na	na	na	na	na
scaffold1998	None	+	1098	na	na	na	na	na
scaffold2001	None	+	1095	na	na	na	na	na
scaffold2002	None	+	1092	na	na	na	na	na
scaffold2003	None	+	1083	na	na	na	na	na
scaffold2005	None	+	1079	na	na	na	na	na
scaffold2006	None	+	1078	na	na	na	na	na
scaffold2007	None	+	1077	na	na	na	na	na
scaffold2008	None	+	1077	na	na	na	na	na
scaffold2010	None	+	1066	na	na	na	na	na
scaffold2012	None	+	1065	na	na	na	na	na
scaffold2014	None	+	1060	na	na	na	na	na
scaffold2015	None	+	1057	na	na	na	na	na
scaffold2016	None	+	1055	na	na	na	na	na
scaffold2019	None	+	1053	na	na	na	na	na
scaffold2020	None	+	1050	na	na	na	na	na
scaffold2021	None	+	1049	na	na	na	na	na
scaffold2022	None	+	1048	na	na	na	na	na
scaffold2024	None	+	1045	na	na	na	na	na
scaffold2025	None	+	1044	na	na	na	na	na
scaffold2026	None	+	1044	na	na	na	na	na
scaffold2027	None	+	1042	na	na	na	na	na
scaffold2028	None	+	1040	na	na	na	na	na
scaffold2029	None	+	1036	na	na	na	na	na
scaffold2030	None	+	1034	na	na	na	na	na
scaffold2035	None	+	1030	na	na	na	na	na
scaffold2036	None	+	1029	na	na	na	na	na
scaffold2037	None	+	1029	na	na	na	na	na
scaffold2039	None	+	1024	na	na	na	na	na
scaffold2040	None	+	1023	na	na	na	na	na
scaffold2041	None	+	1021	na	na	na	na	na
scaffold2042	None	+	1017	na	na	na	na	na
scaffold2043	None	+	1013	na	na	na	na	na
scaffold2044	None	+	1010	na	na	na	na	na
scaffold2045	None	+	1009	na	na	na	na	na
scaffold2046	None	+	1007	na	na	na	na	na
scaffold2047	None	+	1002	na	na	na	na	na
scaffold2048	None	+	1001	na	na	na	na	na
scaffold2156	None	+	34053	na	na	na	na	na
scaffold2221	None	+	18639	na	na	na	na	na
scaffold2230	None	+	16954	na	na	na	na	na
scaffold2239	None	+	15871	na	na	na	na	na
scaffold2240	None	+	15692	na	na	na	na	na
scaffold2261	None	+	2470	na	na	na	na	na
scaffold2264	None	+	2219	na	na	na	na	na
scaffold2294	None	+	9329	na	na	na	na	na
scaffold2296	None	+	9184	na	na	na	na	na
scaffold2297	None	+	9097	na	na	na	na	na
scaffold2298	None	+	9081	na	na	na	na	na
scaffold2304	None	+	8790	na	na	na	na	na
scaffold2309	None	+	8584	na	na	na	na	na
scaffold2311	None	+	8487	na	na	na	na	na
scaffold2315	None	+	8237	na	na	na	na	na
scaffold2323	None	+	7770	na	na	na	na	na
scaffold2325	None	+	7697	na	na	na	na	na
scaffold2326	None	+	5624	na	na	na	na	na
scaffold2327	None	+	1378	na	na	na	na	na
scaffold2329	None	+	7540	na	na	na	na	na
scaffold2343	None	+	1919	na	na	na	na	na
scaffold2371	None	+	4508	na	na	na	na	na
scaffold2372	None	+	5691	na	na	na	na	na
scaffold2375	None	+	5574	na	na	na	na	na
scaffold2380	None	+	2257	na	na	na	na	na
scaffold2383	None	+	5357	na	na	na	na	na
scaffold2384	None	+	5273	na	na	na	na	na
scaffold2394	None	+	4867	na	na	na	na	na
scaffold2397	None	+	4776	na	na	na	na	na
scaffold2403	None	+	4667	na	na	na	na	na
scaffold2404	None	+	4605	na	na	na	na	na
scaffold2406	None	+	4594	na	na	na	na	na
scaffold2407	None	+	4576	na	na	na	na	na
scaffold2409	None	+	4504	na	na	na	na	na
scaffold2413	None	+	1577	na	na	na	na	na
scaffold2416	None	+	2393	na	na	na	na	na
scaffold2417	None	+	4220	na	na	na	na	na
scaffold2424	None	+	4095	na	na	na	na	na
scaffold2431	None	+	1491	na	na	na	na	na
scaffold2437	None	+	3768	na	na	na	na	na
scaffold2438	None	+	3759	na	na	na	na	na
scaffold2441	None	+	3741	na	na	na	na	na
scaffold2445	None	+	3646	na	na	na	na	na
scaffold2453	None	+	3536	na	na	na	na	na
scaffold2457	None	+	2164	na	na	na	na	na
scaffold2461	None	+	3410	na	na	na	na	na
scaffold2462	None	+	3331	na	na	na	na	na
scaffold2463	None	+	3324	na	na	na	na	na
scaffold2466	None	+	3252	na	na	na	na	na
scaffold2468	None	+	3156	na	na	na	na	na
scaffold2469	None	+	3131	na	na	na	na	na
scaffold2473	None	+	3046	na	na	na	na	na
scaffold2474	None	+	2968	na	na	na	na	na
scaffold2475	None	+	2966	na	na	na	na	na
scaffold2479	None	+	2004	na	na	na	na	na
scaffold2483	None	+	2891	na	na	na	na	na
scaffold2484	None	+	2874	na	na	na	na	na
scaffold2487	None	+	2798	na	na	na	na	na
scaffold2488	None	+	2789	na	na	na	na	na
scaffold2493	None	+	2747	na	na	na	na	na
scaffold2494	None	+	2738	na	na	na	na	na
scaffold2496	None	+	2705	na	na	na	na	na
scaffold2497	None	+	1889	na	na	na	na	na
scaffold2501	None	+	2595	na	na	na	na	na
scaffold2502	None	+	2592	na	na	na	na	na
scaffold2503	None	+	2587	na	na	na	na	na
scaffold2506	None	+	2574	na	na	na	na	na
scaffold2508	None	+	2525	na	na	na	na	na
scaffold2509	None	+	2444	na	na	na	na	na
scaffold2511	None	+	2409	na	na	na	na	na
scaffold2513	None	+	2368	na	na	na	na	na
scaffold2515	None	+	2358	na	na	na	na	na
scaffold2518	None	+	2312	na	na	na	na	na
scaffold2519	None	+	2307	na	na	na	na	na
scaffold2525	None	+	2257	na	na	na	na	na
scaffold2527	None	+	2222	na	na	na	na	na
scaffold2529	None	+	2182	na	na	na	na	na
scaffold2531	None	+	1601	na	na	na	na	na
scaffold2532	None	+	2138	na	na	na	na	na
scaffold2534	None	+	2098	na	na	na	na	na
scaffold2535	None	+	2089	na	na	na	na	na
scaffold2537	None	+	2067	na	na	na	na	na
scaffold2539	None	+	2055	na	na	na	na	na
scaffold2542	None	+	2041	na	na	na	na	na
scaffold2543	None	+	2032	na	na	na	na	na
scaffold2546	None	+	1263	na	na	na	na	na
scaffold2548	None	+	1957	na	na	na	na	na
scaffold2549	None	+	1881	na	na	na	na	na
scaffold2551	None	+	1910	na	na	na	na	na
scaffold2552	None	+	1902	na	na	na	na	na
scaffold2555	None	+	1869	na	na	na	na	na
scaffold2560	None	+	1784	na	na	na	na	na
scaffold2562	None	+	1780	na	na	na	na	na
scaffold2563	None	+	1778	na	na	na	na	na
scaffold2564	None	+	1758	na	na	na	na	na
scaffold2566	None	+	1739	na	na	na	na	na
scaffold2567	None	+	1705	na	na	na	na	na
scaffold2568	None	+	1685	na	na	na	na	na
scaffold2569	None	+	1664	na	na	na	na	na
scaffold2570	None	+	1653	na	na	na	na	na
scaffold2571	None	+	1624	na	na	na	na	na
scaffold2573	None	+	1570	na	na	na	na	na
scaffold2574	None	+	1594	na	na	na	na	na
scaffold2576	None	+	1584	na	na	na	na	na
scaffold2577	None	+	1579	na	na	na	na	na
scaffold2578	None	+	1578	na	na	na	na	na
scaffold2579	None	+	1554	na	na	na	na	na
scaffold2580	None	+	1532	na	na	na	na	na
scaffold2582	None	+	1501	na	na	na	na	na
scaffold2583	None	+	1500	na	na	na	na	na
scaffold2585	None	+	1478	na	na	na	na	na
scaffold2586	None	+	1475	na	na	na	na	na
scaffold2587	None	+	1469	na	na	na	na	na
scaffold2589	None	+	1434	na	na	na	na	na
scaffold2590	None	+	1427	na	na	na	na	na
scaffold2591	None	+	1423	na	na	na	na	na
scaffold2592	None	+	1408	na	na	na	na	na
scaffold2594	None	+	1382	na	na	na	na	na
scaffold2595	None	+	1373	na	na	na	na	na
scaffold2596	None	+	1372	na	na	na	na	na
scaffold2597	None	+	1352	na	na	na	na	na
scaffold2599	None	+	1341	na	na	na	na	na
scaffold2600	None	+	1340	na	na	na	na	na
scaffold2602	None	+	1321	na	na	na	na	na
scaffold2605	None	+	1292	na	na	na	na	na
scaffold2606	None	+	1254	na	na	na	na	na
scaffold2607	None	+	1239	na	na	na	na	na
scaffold2610	None	+	1199	na	na	na	na	na
scaffold2611	None	+	1198	na	na	na	na	na
scaffold2612	None	+	1196	na	na	na	na	na
scaffold2613	None	+	1176	na	na	na	na	na
scaffold2614	None	+	1167	na	na	na	na	na
scaffold2615	None	+	1161	na	na	na	na	na
scaffold2616	None	+	1158	na	na	na	na	na
scaffold2617	None	+	1149	na	na	na	na	na
scaffold2618	None	+	1110	na	na	na	na	na
scaffold2619	None	+	1100	na	na	na	na	na
scaffold2620	None	+	1097	na	na	na	na	na
scaffold2622	None	+	1080	na	na	na	na	na
scaffold2624	None	+	1041	na	na	na	na	na
scaffold2625	None	+	993	na	na	na	na	na
scaffold2627	None	+	964	na	na	na	na	na
scaffold2628	None	+	933	na	na	na	na	na
scaffold2629	None	+	919	na	na	na	na	na
scaffold2630	None	+	918	na	na	na	na	na
scaffold2631	None	+	910	na	na	na	na	na
scaffold2632	None	+	900	na	na	na	na	na
scaffold2633	None	+	887	na	na	na	na	na
scaffold2634	None	+	887	na	na	na	na	na
scaffold2635	None	+	877	na	na	na	na	na
scaffold2636	None	+	872	na	na	na	na	na
scaffold2637	None	+	861	na	na	na	na	na
scaffold2638	None	+	860	na	na	na	na	na
scaffold2639	None	+	848	na	na	na	na	na
scaffold2640	None	+	834	na	na	na	na	na
scaffold2641	None	+	822	na	na	na	na	na
scaffold2642	None	+	815	na	na	na	na	na
scaffold2644	None	+	778	na	na	na	na	na
scaffold2645	None	+	768	na	na	na	na	na
scaffold2647	None	+	748	na	na	na	na	na
scaffold2648	None	+	747	na	na	na	na	na
scaffold2649	None	+	746	na	na	na	na	na
scaffold2650	None	+	733	na	na	na	na	na
scaffold2651	None	+	717	na	na	na	na	na
scaffold2652	None	+	710	na	na	na	na	na
scaffold2653	None	+	693	na	na	na	na	na
scaffold2654	None	+	690	na	na	na	na	na
scaffold2655	None	+	681	na	na	na	na	na
scaffold2656	None	+	659	na	na	na	na	na
scaffold2657	None	+	657	na	na	na	na	na
scaffold2658	None	+	652	na	na	na	na	na
scaffold2659	None	+	643	na	na	na	na	na
scaffold2660	None	+	640	na	na	na	na	na
scaffold2661	None	+	631	na	na	na	na	na
scaffold2662	None	+	626	na	na	na	na	na
scaffold2663	None	+	611	na	na	na	na	na
scaffold2664	None	+	598	na	na	na	na	na
scaffold2665	None	+	596	na	na	na	na	na
scaffold2666	None	+	586	na	na	na	na	na
scaffold2667	None	+	581	na	na	na	na	na
scaffold2668	None	+	576	na	na	na	na	na
scaffold2669	None	+	568	na	na	na	na	na
scaffold2670	None	+	568	na	na	na	na	na
scaffold2671	None	+	550	na	na	na	na	na
scaffold2672	None	+	546	na	na	na	na	na
scaffold2673	None	+	533	na	na	na	na	na
scaffold2674	None	+	520	na	na	na	na	na
scaffold2675	None	+	520	na	na	na	na	na
scaffold2676	None	+	519	na	na	na	na	na
scaffold2677	None	+	511	na	na	na	na	na
scaffold1734	chr-5	+	1514	792	1472	43941197	6652781	6654325
scaffold1406	chr-5	-	2693	2054	2655	43941197	7596781	7597384
scaffold158	chr-5	-	436586	34834	436249	43941197	2452173	37994453
scaffold2363	chr-5	-	4050	30	4030	43941197	9076873	9081406
scaffold2448	chr-5	+	3594	84	784	43941197	10197810	10201040
scaffold1106	chr-5	-	5745	246	1200	43941197	10197817	10200973
scaffold1596	chr-5	+	1797	623	1757	43941197	11362674	11363777
scaffold1799	chr-5	-	1416	875	931	43941197	4042218	19103616
scaffold835	chr-5	-	14506	1080	3508	43941197	11595762	11598182
scaffold176	chr-5	-	372039	37895	323800	43941197	2663810	40949978
scaffold599	chr-5	-	85324	46691	51482	43941197	12287857	12752057
scaffold308	chr-5	+	96096	17958	81661	43941197	11775751	37103238
scaffold2224	chr-5	+	18235	8311	17048	43941197	9295047	20665414
scaffold2249	chr-5	-	14328	3171	9727	43941197	7437049	28596077
scaffold129	chr-5	-	526047	2185	494529	43941197	52052	42445865
scaffold1483	chr-5	-	2253	186	411	43941197	14591146	14591375
scaffold670	chr-5	-	36616	16761	35324	43941197	13118068	36822903
scaffold1745	chr-5	+	1487	68	176	43941197	11032156	25367732
scaffold1490	chr-5	-	2200	889	2197	43941197	16157491	16278407
scaffold356	chr-5	-	49851	41457	44913	43941197	15655739	18851716
scaffold2464	chr-5	+	3315	209	1828	43941197	10918298	21558431
scaffold1223	chr-5	+	4609	713	2872	43941197	17594963	17610720
scaffold1792	chr-5	+	1423	566	1196	43941197	2990081	34529154
scaffold1140	chr-5	-	5452	56	677	43941197	6962169	28870469
scaffold970	chr-5	-	8794	8353	8649	43941197	18114083	18167425
scaffold366	chr-5	-	37726	11204	17669	43941197	6284502	18862652
scaffold1649	chr-5	-	1676	1509	1629	43941197	18957591	18957711
scaffold71	chr-5	+	1101734	54661	1053348	43941197	3089690	43841154
scaffold2608	chr-5	-	1239	82	207	43941197	20188902	20189027
scaffold1002	chr-5	-	7411	7	1663	43941197	20375430	20414112
scaffold343	chr-5	+	63476	51676	60313	43941197	20372680	20419456
scaffold2225	chr-5	-	16323	819	11891	43941197	8703833	36672525
scaffold1878	chr-5	-	1286	2	714	43941197	10647214	37246840
scaffold1060	chr-5	-	6347	4413	5014	43941197	25138733	25209302
scaffold755	chr-5	-	20138	2070	4520	43941197	14649072	38050223
scaffold2492	chr-5	-	2776	1981	2775	43941197	12651302	38731828
scaffold1213	chr-5	-	4703	1415	1740	43941197	28143052	28143427
scaffold2145	chr-5	-	37087	5461	25693	43941197	1043080	40078603
scaffold2178	chr-5	-	27602	12568	16492	43941197	8016180	29430674
scaffold424	chr-5	-	9037	155	4816	43941197	30809951	30813616
scaffold1100	chr-5	-	5830	5010	5809	43941197	18732600	43260070
scaffold1296	chr-5	-	4118	3450	4060	43941197	26287857	40573160
scaffold1599	chr-5	+	1787	40	416	43941197	18712365	37574348
scaffold1290	chr-5	-	4144	1495	3627	43941197	32791900	32793933
scaffold2257	chr-5	-	13724	9397	12944	43941197	27836735	38942710
scaffold1908	chr-5	+	1226	929	1210	43941197	33314901	33315182
scaffold834	chr-5	-	14544	3661	4645	43941197	34467734	34468760
scaffold1369	chr-5	+	2961	332	1092	43941197	35235072	35235835
scaffold867	chr-5	+	12247	218	9619	43941197	2823495	42784437
scaffold1453	chr-5	+	2409	2208	2370	43941197	36796814	36796976
scaffold1894	chr-5	+	1258	894	1244	43941197	40053800	40054151
scaffold2121	chr-5	+	51448	17099	21618	43941197	42047497	42052172
scaffold1137	chr-6	-	5464	4002	5455	62381154	1953051	1954535
scaffold1181	chr-6	-	4974	197	1321	62381154	2925859	2927023
scaffold1067	chr-6	-	6194	41	1412	62381154	2925955	2927361
scaffold1450	chr-6	+	2419	8	1355	62381154	3048277	3049785
scaffold1670	chr-6	+	1639	654	1008	62381154	3540880	3541370
scaffold205	chr-6	-	266018	21775	265010	62381154	1089497	39607588
scaffold1952	chr-6	-	1169	414	626	62381154	5739994	5740206
scaffold1225	chr-6	-	4597	1699	1874	62381154	6564034	6564209
scaffold945	chr-6	-	9057	2543	5881	62381154	6794400	6797717
scaffold1665	chr-6	+	1657	95	1415	62381154	6796273	6797717
scaffold262	chr-6	-	155095	7541	153562	62381154	7596950	10848044
scaffold822	chr-6	+	15731	1952	4981	62381154	7867007	7869948
scaffold2176	chr-6	-	23712	237	4006	62381154	1920601	16104441
scaffold2334	chr-6	+	7292	3421	7110	62381154	8921078	8987833
scaffold1288	chr-6	-	4155	2051	2723	62381154	9149600	9150272
scaffold802	chr-6	+	16691	1250	1407	62381154	9228889	9229257
scaffold555	chr-6	-	198077	51842	194255	62381154	2925813	60071369
scaffold1939	chr-6	-	1186	1002	1162	62381154	10589860	10649294
scaffold729	chr-6	+	23610	1831	11898	62381154	10619671	57679699
scaffold35	chr-6	+	1637767	39872	1563331	62381154	1599549	54972788
scaffold1982	chr-6	+	1114	46	207	62381154	12213989	12214150
scaffold828	chr-6	+	15021	7713	8070	62381154	12596815	12597172
scaffold1278	chr-6	+	4230	79	999	62381154	13287595	13288645
scaffold1520	chr-6	+	2066	1763	1994	62381154	13553951	13554180
scaffold405	chr-6	-	13406	477	2234	62381154	14559614	14561434
scaffold86	chr-6	+	941089	45626	875852	62381154	2927044	62209026
scaffold1561	chr-6	+	1910	693	1191	62381154	1583234	27488253
scaffold2435	chr-6	+	3829	0	1270	62381154	8078459	26403458
scaffold2530	chr-6	+	2141	2	507	62381154	5238331	32703912
scaffold1151	chr-6	+	5354	159	1021	62381154	10099065	17747101
scaffold833	chr-6	+	14553	180	4590	62381154	18002071	18014754
scaffold197	chr-6	+	288383	2104	208839	62381154	13831906	33437606
scaffold2148	chr-6	+	36173	813	4793	62381154	5801767	41659578
scaffold899	chr-6	+	10391	4251	5291	62381154	5237858	31966596
scaffold1071	chr-6	+	6097	5454	6046	62381154	16840913	22879972
scaffold1367	chr-6	-	3017	2348	3004	62381154	5829276	30793316
scaffold997	chr-6	+	7591	5450	6243	62381154	20836052	20836936
scaffold79	chr-6	+	1007144	105695	993270	62381154	2857696	61553647
scaffold536	chr-6	+	314939	7611	299396	62381154	255565	56533237
scaffold1761	chr-6	+	1467	730	1151	62381154	22151051	22151562
scaffold787	chr-6	+	17200	626	16065	62381154	13990651	50931508
scaffold1727	chr-6	-	1522	84	555	62381154	20433156	24612585
scaffold2429	chr-6	-	4029	3925	4026	62381154	9114932	37087242
scaffold2117	chr-6	+	54792	19723	31660	62381154	19913013	23418921
scaffold804	chr-6	-	16572	7652	13607	62381154	23257547	30701189
scaffold2079	chr-6	+	122897	32197	121745	62381154	7995290	59963017
scaffold419	chr-6	-	9586	793	1557	62381154	5238045	32703912
scaffold2556	chr-6	-	1856	1001	1584	62381154	24588054	24588644
scaffold2086	chr-6	+	98089	88318	98087	62381154	21857119	25190457
scaffold1542	chr-6	-	1982	287	500	62381154	25092903	25093163
scaffold741	chr-6	-	22000	10138	21580	62381154	24637269	59226153
scaffold764	chr-6	-	19535	5297	6200	62381154	25438939	25440944
scaffold300	chr-6	+	103886	31455	103809	62381154	21620249	30958384
scaffold872	chr-6	+	11821	7099	10728	62381154	24727407	26386725
scaffold1149	chr-6	+	5377	33	3623	62381154	21637051	45607300
scaffold998	chr-6	-	7558	35	6003	62381154	2927230	27763008
scaffold2350	chr-6	+	3441	8	100	62381154	21069844	31268239
scaffold2265	chr-6	+	13035	12196	12364	62381154	5426992	48342473
scaffold7	chr-6	+	3199244	11939	3139099	62381154	774612	61617591
scaffold2091	chr-6	+	89132	8069	74924	62381154	20899247	61232055
scaffold2126	chr-6	-	48657	10945	32963	62381154	23553748	49029829
scaffold2213	chr-6	+	19771	12065	12278	62381154	5570097	42213712
scaffold2455	chr-6	+	3522	137	548	62381154	27779521	27779941
scaffold2075	chr-6	+	125671	84080	124841	62381154	20699642	54970561
scaffold323	chr-6	-	83146	70874	76582	62381154	15634758	45039389
scaffold1879	chr-6	-	1285	145	224	62381154	29035132	29035211
scaffold972	chr-6	+	8763	23	8141	62381154	10141608	40511561
scaffold1017	chr-6	+	7154	4703	6842	62381154	12075792	48020812
scaffold251	chr-6	+	172561	639	172340	62381154	7995290	60607335
scaffold1166	chr-6	+	5157	4627	5155	62381154	28980696	30708359
scaffold794	chr-6	+	16951	8133	16891	62381154	7608356	61155638
scaffold2443	chr-6	-	3695	2660	3531	62381154	30637499	30638469
scaffold123	chr-6	+	576540	371	523493	62381154	5787440	60454449
scaffold935	chr-6	-	9193	8132	8655	62381154	30792578	30793059
scaffold989	chr-6	+	8224	1263	2721	62381154	30356702	41905400
scaffold2486	chr-6	+	2819	1779	2804	62381154	21857117	41659578
scaffold1487	chr-6	-	2226	349	2221	62381154	17540129	46184473
scaffold2319	chr-6	+	8093	628	3922	62381154	31961905	31967001
scaffold27	chr-6	+	1929533	9707	1898554	62381154	2925859	61696185
scaffold2216	chr-6	+	19651	5406	14051	62381154	15634616	57246006
scaffold170	chr-6	+	390835	61273	354409	62381154	5747963	59638010
scaffold746	chr-6	-	21168	13124	13833	62381154	14487124	59573902
scaffold1650	chr-6	+	1676	652	1334	62381154	25281168	55399421
scaffold1014	chr-6	-	7178	5341	5762	62381154	27377303	36716648
scaffold1041	chr-6	-	6578	1242	6577	62381154	19072073	38102521
scaffold248	chr-6	+	180933	14778	71030	62381154	21637051	45607300
scaffold304	chr-6	+	100867	10834	95194	62381154	29868989	51129874
scaffold274	chr-6	+	133652	32915	107206	62381154	13831906	56227638
scaffold2172	chr-6	-	28811	1265	16562	62381154	5546457	57246006
scaffold57	chr-6	+	1257035	6980	1222652	62381154	2857806	58293110
scaffold2211	chr-6	-	20134	5498	7621	62381154	15634616	57246006
scaffold533	chr-6	-	322989	145206	286230	62381154	9228904	62026787
scaffold104	chr-6	+	775814	16390	775800	62381154	13555172	59706840
scaffold59	chr-6	-	1238919	2107	1217344	62381154	2925924	60768329
scaffold921	chr-6	+	9546	8068	9532	62381154	38571353	38572849
scaffold2196	chr-6	-	22478	4381	6536	62381154	38571109	38573261
scaffold627	chr-6	+	57868	377	48984	62381154	18105625	53299804
scaffold937	chr-6	-	9181	4321	6398	62381154	37935795	43953452
scaffold1007	chr-6	-	7368	347	929	62381154	41188369	41188950
scaffold25	chr-6	+	1976089	4784	1973717	62381154	6353377	53299970
scaffold1547	chr-6	-	1953	182	386	62381154	41718781	41718985
scaffold1244	chr-6	+	4488	371	4464	62381154	42130042	42133803
scaffold213	chr-6	-	250523	32356	237903	62381154	4211531	60513691
scaffold949	chr-6	+	9030	774	7464	62381154	2925844	43433738
scaffold1389	chr-6	-	2812	877	1020	62381154	43666977	43667120
scaffold141	chr-6	-	468907	7093	393132	62381154	5436240	59344145
scaffold2113	chr-6	-	58588	29147	32931	62381154	42671631	48397589
scaffold1305	chr-6	+	4015	2438	2484	62381154	45737566	45737612
scaffold1737	chr-6	-	1503	143	402	62381154	31175618	59934270
scaffold2164	chr-6	+	30166	13017	19860	62381154	7600811	47707379
scaffold80	chr-6	+	999824	117550	784954	62381154	25151725	54177711
scaffold1081	chr-6	-	6009	259	4682	62381154	38866178	58045620
scaffold447	chr-6	-	5852	1483	4303	62381154	48876071	48878804
scaffold1646	chr-6	-	1681	909	1677	62381154	46733502	52608936
scaffold1651	chr-6	-	1671	992	1511	62381154	50252033	50252554
scaffold711	chr-6	+	26045	8000	20327	62381154	20895389	54069524
scaffold1516	chr-6	+	2091	1393	1701	62381154	51146427	51146717
scaffold743	chr-6	+	21503	10623	11743	62381154	34336245	53156382
scaffold154	chr-6	-	449350	35353	386726	62381154	1886694	62182137
scaffold1264	chr-6	-	4290	331	1245	62381154	48954261	59362574
scaffold868	chr-6	-	12120	22	191	62381154	55393992	56462821
scaffold1834	chr-6	+	1356	1003	1355	62381154	57171135	57171767
scaffold863	chr-6	+	12444	10972	11489	62381154	57173713	57174517
scaffold2353	chr-6	+	6429	759	6119	62381154	57190708	57194843
scaffold1053	chr-6	-	6418	658	705	62381154	56025771	59825622
scaffold2131	chr-6	-	45336	4207	34236	62381154	25151725	59576919
scaffold707	chr-6	-	26462	1475	4608	62381154	59573240	59576858
scaffold860	chr-6	+	12681	231	4150	62381154	59573240	59577028
scaffold1329	chr-6	+	3766	87	1296	62381154	59575177	59576405
scaffold823	chr-6	+	15677	63	12642	62381154	18256789	60746776
scaffold730	chr-6	-	23607	3860	4545	62381154	58698790	61753188
scaffold2000	chr-6	+	1096	19	242	62381154	60821802	60822035
scaffold1845	chr-7	-	1338	926	1150	41470725	2468964	2469191
scaffold1672	chr-7	+	1637	249	625	41470725	3123650	3124038
scaffold2485	chr-7	-	2867	420	2825	41470725	5352142	5827910
scaffold993	chr-7	-	7801	328	1268	41470725	5448651	5920800
scaffold305	chr-7	+	97997	12482	45505	41470725	1639075	31510543
scaffold912	chr-7	+	9838	2534	2938	41470725	7172123	7172521
scaffold1334	chr-7	-	3661	1318	2380	41470725	7778432	7779539
scaffold181	chr-7	-	345658	41591	336235	41470725	4581532	35511816
scaffold1654	chr-7	+	1667	522	1460	41470725	8968067	8968954
scaffold2450	chr-7	+	3553	4	2930	41470725	8968731	8970996
scaffold230	chr-7	-	206694	15652	178996	41470725	8325298	37359173
scaffold589	chr-7	+	110495	25724	93598	41470725	1308531	14972166
scaffold2307	chr-7	-	8653	8127	8570	41470725	9150104	9150586
scaffold269	chr-7	-	145295	52472	56117	41470725	4564285	13952762
scaffold1214	chr-7	-	4694	2	1174	41470725	2741162	15589226
scaffold647	chr-7	-	43383	22090	33755	41470725	1308538	13952781
scaffold1835	chr-7	+	1354	37	222	41470725	9828978	9829163
scaffold818	chr-7	+	16002	6787	8480	41470725	9865127	9866954
scaffold1934	chr-7	-	1188	8	1104	41470725	11066561	11157481
scaffold758	chr-7	+	19853	2617	12886	41470725	11261785	11280054
scaffold1020	chr-7	-	7133	2301	5177	41470725	12409321	12412297
scaffold788	chr-7	+	17199	16496	17131	41470725	12721084	12722169
scaffold254	chr-7	+	170345	102	3652	41470725	2818211	32289880
scaffold2335	chr-7	+	7238	80	202	41470725	13297678	13297800
scaffold2251	chr-7	-	14309	2165	12244	41470725	13439983	30808707
scaffold227	chr-7	+	208610	93677	205538	41470725	12743176	14648281
scaffold2158	chr-7	-	32357	22127	32107	41470725	1308531	30317814
scaffold1013	chr-7	+	7194	2359	3604	41470725	15654216	15655428
scaffold1206	chr-7	+	4759	6	737	41470725	8055090	31032113
scaffold2177	chr-7	-	27692	407	2490	41470725	3242332	31510467
scaffold1705	chr-7	-	1563	1023	1529	41470725	16987071	18508929
scaffold1492	chr-7	+	2180	1638	2004	41470725	17719571	17719864
scaffold130	chr-7	-	520541	9769	412509	41470725	13453426	40521177
scaffold1392	chr-7	+	2797	2266	2677	41470725	17805539	17806046
scaffold411	chr-7	-	12048	9665	9869	41470725	5116779	39935986
scaffold2081	chr-7	-	117098	5531	67420	41470725	17059664	19674997
scaffold2124	chr-7	+	50394	34342	45477	41470725	8923689	40185440
scaffold557	chr-7	-	196082	2374	98098	41470725	1308531	40521177
scaffold402	chr-7	+	14113	3275	12765	41470725	13611840	35362031
scaffold157	chr-7	-	437807	27246	303955	41470725	4646014	38066802
scaffold1310	chr-7	-	3962	3581	3954	41470725	12380733	22616311
scaffold11	chr-7	+	2777536	188	2698413	41470725	1308531	39657072
scaffold2381	chr-7	-	5452	23	4209	41470725	22669048	22669700
scaffold2250	chr-7	-	14323	7990	8392	41470725	19327256	26279253
scaffold2112	chr-7	-	59259	43423	55317	41470725	20346951	37057446
scaffold708	chr-7	-	26219	13388	21525	41470725	20635378	36092895
scaffold288	chr-7	+	116707	35885	66656	41470725	9517649	36879506
scaffold1023	chr-7	-	7027	223	2767	41470725	12407062	30373168
scaffold1062	chr-7	-	6300	6169	6249	41470725	24371484	24371564
scaffold698	chr-7	-	29407	26903	27222	41470725	12129514	36648786
scaffold232	chr-7	-	205990	29283	205981	41470725	4564282	34259105
scaffold1703	chr-7	-	1564	963	1455	41470725	24417864	27569060
scaffold1451	chr-7	+	2415	2014	2406	41470725	26003346	26003732
scaffold600	chr-7	-	85235	9391	75498	41470725	279070	41259918
scaffold494	chr-7	+	1917	1566	1788	41470725	27145632	27145813
scaffold980	chr-7	-	8481	7185	7285	41470725	27583133	27587229
scaffold1120	chr-7	+	5590	540	1625	41470725	23394415	39081503
scaffold1270	chr-7	+	4257	172	944	41470725	6019899	33361673
scaffold2421	chr-7	-	4169	2105	2888	41470725	29708017	30435558
scaffold266	chr-7	+	149598	33402	127561	41470725	4661907	35578362
scaffold221	chr-7	-	223508	102480	218375	41470725	15024060	40057470
scaffold772	chr-7	+	18491	14382	15317	41470725	31004462	31005989
scaffold1263	chr-7	-	4292	3764	4217	41470725	31960920	31961312
scaffold605	chr-7	-	82541	13123	31103	41470725	32857720	32875798
scaffold2420	chr-7	+	4192	1644	4148	41470725	31472077	35471245
scaffold83	chr-7	+	965183	31140	779757	41470725	8419546	39657072
scaffold710	chr-7	+	26152	1001	26143	41470725	15653729	41261257
scaffold1082	chr-7	-	6004	4449	4950	41470725	35093851	35094464
scaffold2432	chr-7	+	3945	160	220	41470725	35174433	35174493
scaffold2423	chr-7	-	4137	3896	3999	41470725	35310538	35310641
scaffold156	chr-7	-	439254	259628	364572	41470725	13957779	36115223
scaffold861	chr-7	+	12557	2551	4549	41470725	32633889	36919434
scaffold1	chr-7	-	5136627	46375	5082756	41470725	749065	41261215
scaffold2163	chr-7	-	30236	20115	20553	41470725	35511367	35511790
scaffold2344	chr-7	-	7053	1648	1949	41470725	35511597	35511816
scaffold448	chr-7	+	5844	4843	5797	41470725	35520188	35526786
scaffold2465	chr-7	+	3282	1778	1991	41470725	35534727	35534922
scaffold2572	chr-7	+	1614	127	322	41470725	35551393	35551588
scaffold679	chr-7	+	34611	21516	34245	41470725	35550191	35561222
scaffold2119	chr-7	-	52985	47311	52875	41470725	32527341	40061340
scaffold145	chr-7	-	463476	27931	399702	41470725	24088743	40061340
scaffold2274	chr-7	-	11631	2421	8629	41470725	2747650	40061209
scaffold1729	chr-7	-	1521	75	901	41470725	36882017	36882896
scaffold435	chr-7	-	7423	971	1993	41470725	37220742	37221714
scaffold2033	chr-7	+	1030	609	1025	41470725	37399784	37400200
scaffold222	chr-7	-	219160	3600	206734	41470725	8331530	38066550
scaffold341	chr-7	-	64300	24033	46182	41470725	37106880	37524831
scaffold1107	chr-7	+	5739	218	5529	41470725	35516453	40513597
scaffold2017	chr-7	-	1054	60	979	41470725	40512403	40513340
scaffold813	chr-7	-	16205	9	960	41470725	41259048	41261061
scaffold514	chr-7	-	1230	26	989	41470725	41388437	41389469
scaffold1220	chr-8	+	4645	1388	3538	59555380	295942	47664109
scaffold1235	chr-8	+	4542	1403	3675	59555380	1445606	1449098
scaffold507	chr-8	-	1543	871	1535	59555380	3614317	3614982
scaffold1359	chr-8	-	3150	798	2003	59555380	4871603	4872880
scaffold1146	chr-8	-	5403	0	4404	59555380	6463951	6467707
scaffold847	chr-8	-	13318	5489	6230	59555380	7421709	7422450
scaffold1550	chr-8	-	1944	1443	1599	59555380	7639389	7639545
scaffold573	chr-8	+	150925	21043	147824	59555380	7074355	40859218
scaffold1506	chr-8	+	2128	1896	1960	59555380	8570205	8570269
scaffold111	chr-8	-	700971	41907	648151	59555380	3838312	56874314
scaffold382	chr-8	-	25118	19518	22307	59555380	10519511	12316087
scaffold2478	chr-8	-	2942	15	1268	59555380	10935203	12688733
scaffold988	chr-8	-	8279	1396	7254	59555380	11995506	12000984
scaffold503	chr-8	+	1631	125	412	59555380	6119351	13306088
scaffold846	chr-8	+	13320	208	2484	59555380	13252084	13253240
scaffold2434	chr-8	+	3856	1	3809	59555380	3460313	57910537
scaffold68	chr-8	+	1140582	173989	1108680	59555380	529918	52423741
scaffold2332	chr-8	+	7375	1065	6168	59555380	11866820	17638655
scaffold336	chr-8	+	69081	46414	49458	59555380	3457206	27363734
scaffold502	chr-8	-	1669	11	353	59555380	3109638	27632448
scaffold2067	chr-8	+	150778	3137	120711	59555380	4890392	54347199
scaffold377	chr-8	-	28122	22050	23234	59555380	3073939	33317180
scaffold1221	chr-8	+	4637	490	1336	59555380	17189745	17190613
scaffold558	chr-8	+	193069	3445	171343	59555380	5848210	54531154
scaffold105	chr-8	+	773054	2962	772926	59555380	3840833	53409184
scaffold1030	chr-8	+	6894	4564	6529	59555380	19075472	19077396
scaffold1049	chr-8	+	6489	1154	1703	59555380	19717247	19717805
scaffold971	chr-8	-	8769	462	3900	59555380	15695130	34010061
scaffold1044	chr-8	+	6551	3024	3159	59555380	19954099	19954240
scaffold1072	chr-8	-	6097	3362	3781	59555380	19287984	29296101
scaffold2354	chr-8	-	6377	4679	6336	59555380	21175727	21177259
scaffold1318	chr-8	-	3915	1472	3818	59555380	21608516	41383474
scaffold1323	chr-8	-	3827	5	1085	59555380	4892691	33270639
scaffold346	chr-8	+	58838	12250	56307	59555380	12601323	43269325
scaffold2320	chr-8	+	7993	1491	7992	59555380	6679198	55061511
scaffold1802	chr-8	-	1408	178	801	59555380	24270354	24348742
scaffold748	chr-8	-	20714	6863	7785	59555380	24385148	24386061
scaffold215	chr-8	-	243702	16099	139977	59555380	3285254	50878860
scaffold592	chr-8	-	108003	5087	87340	59555380	7094906	55513135
scaffold192	chr-8	-	304654	55311	185937	59555380	7094906	43263055
scaffold1035	chr-8	-	6764	399	3057	59555380	14899594	52068408
scaffold1317	chr-8	-	3917	1603	3419	59555380	17706554	52383511
scaffold166	chr-8	+	402943	4086	386814	59555380	397853	54523263
scaffold576	chr-8	+	138626	35077	135933	59555380	7094906	58889033
scaffold1769	chr-8	-	1455	984	1066	59555380	26677717	26682382
scaffold2083	chr-8	+	108149	30988	101957	59555380	3938855	34489137
scaffold1442	chr-8	+	2464	1098	2297	59555380	25426889	44865464
scaffold2246	chr-8	-	14578	4047	9166	59555380	24089351	39052144
scaffold55	chr-8	+	1272431	164972	1255368	59555380	2944729	59513247
scaffold189	chr-8	-	313864	8218	267386	59555380	1284329	56727271
scaffold2108	chr-8	+	63152	42029	45811	59555380	28027169	28030905
scaffold1395	chr-8	+	2771	31	1845	59555380	28099120	28100975
scaffold1501	chr-8	-	2143	376	1399	59555380	25427063	48915356
scaffold228	chr-8	+	207583	17518	207578	59555380	14516356	52071055
scaffold167	chr-8	+	399839	16762	376451	59555380	369800	56833355
scaffold1539	chr-8	-	1995	597	1107	59555380	10441842	47986047
scaffold45	chr-8	+	1493730	1843	1423121	59555380	269252	57856318
scaffold285	chr-8	-	120722	52603	119188	59555380	5375278	51113258
scaffold697	chr-8	+	30071	13298	30017	59555380	22429572	58449800
scaffold631	chr-8	+	52023	6681	48922	59555380	19966000	56419270
scaffold1791	chr-8	+	1424	1101	1411	59555380	11967026	49007461
scaffold807	chr-8	+	16346	447	16259	59555380	8765184	32969696
scaffold2161	chr-8	+	30886	14306	15807	59555380	31726352	31727758
scaffold142	chr-8	+	468508	12574	433074	59555380	16791343	55424530
scaffold1909	chr-8	+	1226	821	1074	59555380	32314781	32314994
scaffold2476	chr-8	-	1049	303	485	59555380	32314781	32314994
scaffold1800	chr-8	-	1416	22	1412	59555380	19879756	41643888
scaffold201	chr-8	-	269455	40650	265193	59555380	11917618	55942232
scaffold2222	chr-8	+	18564	14520	18231	59555380	25226929	36685419
scaffold986	chr-8	+	8309	116	5836	59555380	34969238	34972836
scaffold510	chr-8	-	1498	244	324	59555380	25229260	44865618
scaffold715	chr-8	+	25321	2243	7839	59555380	26907093	43512155
scaffold775	chr-8	+	18394	13246	18161	59555380	16357304	36107214
scaffold2050	chr-8	+	611283	4052	583272	59555380	6227835	56757426
scaffold49	chr-8	+	1383537	74590	1351685	59555380	3947925	51395954
scaffold241	chr-8	+	189922	40	179756	59555380	6167923	56871548
scaffold1414	chr-8	+	2639	949	2539	59555380	28846185	53789257
scaffold1806	chr-8	+	1403	1230	1401	59555380	29656025	50158983
scaffold2405	chr-8	+	4596	2572	4350	59555380	297935	40023622
scaffold400	chr-8	-	14747	10556	14325	59555380	1620144	44287929
scaffold499	chr-8	-	1767	720	1420	59555380	35311728	43665199
scaffold1201	chr-8	-	4788	339	1749	59555380	39941405	39942828
scaffold2101	chr-8	+	71602	43794	53814	59555380	37985857	42274319
scaffold386	chr-8	-	21769	1161	21764	59555380	16249028	58684404
scaffold2470	chr-8	+	1962	4	159	59555380	41358200	41358355
scaffold607	chr-8	+	77027	30404	61810	59555380	3613601	43269325
scaffold2255	chr-8	-	13881	11316	13072	59555380	39018924	44657473
scaffold2152	chr-8	+	35380	8099	21381	59555380	29932205	45008355
scaffold16	chr-8	+	2589046	801	2550856	59555380	158075	59504711
scaffold2179	chr-8	-	27433	15870	25074	59555380	42267778	42275232
scaffold686	chr-8	+	32122	11781	26807	59555380	35298102	42744818
scaffold2369	chr-8	+	5928	19	5862	59555380	17189778	45147186
scaffold1239	chr-8	+	4509	184	4453	59555380	32779355	54031526
scaffold2588	chr-8	-	1443	47	743	59555380	42621355	44865145
scaffold1245	chr-8	-	4468	3521	4420	59555380	42621609	44865601
scaffold995	chr-8	-	7740	4344	6345	59555380	43247818	45147716
scaffold64	chr-8	-	1190350	173524	1167950	59555380	1284457	57170375
scaffold1196	chr-8	+	4823	3217	4793	59555380	39049690	47557900
scaffold987	chr-8	+	8289	7	1945	59555380	45007681	45009637
scaffold1798	chr-8	-	1417	9	323	59555380	32785471	56867016
scaffold235	chr-8	+	200637	37951	59975	59555380	43247874	45147565
scaffold2581	chr-8	-	1506	427	695	59555380	39244740	49659594
scaffold2188	chr-8	-	25045	6764	19435	59555380	28181665	47557872
scaffold2130	chr-8	-	47122	28130	34503	59555380	46880177	46886966
scaffold432	chr-8	+	4927	3239	4201	59555380	47466826	47467777
scaffold2111	chr-8	+	59782	35592	41327	59555380	43367485	52305321
scaffold370	chr-8	-	35471	28879	31072	59555380	41643036	57999545
scaffold659	chr-8	+	38816	35750	38787	59555380	17031135	48964207
scaffold1016	chr-8	-	7166	5827	7122	59555380	48603036	49210528
scaffold2348	chr-8	-	6928	966	4225	59555380	48603036	49212283
scaffold1229	chr-8	+	4579	156	416	59555380	49527989	49528249
scaffold1749	chr-8	+	1476	668	864	59555380	49725953	49726148
scaffold198	chr-8	+	286002	61916	280218	59555380	5237243	50385846
scaffold2277	chr-8	+	7021	2093	4994	59555380	19054600	51450338
scaffold2454	chr-8	-	1398	508	1199	59555380	50735046	50735737
scaffold1132	chr-8	-	5482	3913	5246	59555380	45145442	56874653
scaffold2204	chr-8	-	21164	205	7097	59555380	51946490	51956702
scaffold216	chr-8	+	241158	31	208162	59555380	19286964	58169406
scaffold630	chr-8	+	52441	7734	52413	59555380	12004063	52946900
scaffold1684	chr-8	-	1599	29	213	59555380	54671060	54671244
scaffold1393	chr-8	-	2790	1449	2348	59555380	55591650	55592567
scaffold2401	chr-8	-	3336	881	1135	59555380	57821707	57821944
scaffold374	chr-9	-	31814	18771	23755	63789909	2186745	2191037
scaffold2376	chr-9	+	5558	4439	4778	63789909	2953927	2954255
scaffold1177	chr-9	-	5041	434	930	63789909	1170691	4777980
scaffold2097	chr-9	-	75213	21063	60185	63789909	1094301	24454504
scaffold1335	chr-9	-	3649	7	989	63789909	4616076	4617083
scaffold2203	chr-9	+	21211	1160	4106	63789909	5411539	5412796
scaffold1308	chr-9	-	3974	2829	3898	63789909	6954442	6955509
scaffold1250	chr-9	-	4436	7	927	63789909	2869126	11605889
scaffold195	chr-9	-	293738	2731	285773	63789909	1437097	62991894
scaffold1226	chr-9	-	4593	2024	2221	63789909	8295156	8295351
scaffold768	chr-9	-	19066	1175	14419	63789909	6915556	11277424
scaffold1932	chr-9	+	1189	9	300	63789909	8752815	8753286
scaffold667	chr-9	+	37376	4370	4687	63789909	630256	14789806
scaffold2155	chr-9	+	34136	2846	19178	63789909	8898465	28185054
scaffold2186	chr-9	-	25172	4198	7202	63789909	9784933	9790533
scaffold278	chr-9	+	127766	32819	52981	63789909	9964971	11610667
scaffold1415	chr-9	-	2633	1296	1411	63789909	10056193	10056308
scaffold2143	chr-9	-	38473	2547	37773	63789909	2953730	10375014
scaffold302	chr-9	-	102444	40933	45372	63789909	10371637	10376058
scaffold508	chr-9	-	1519	906	1064	63789909	10376010	10376165
scaffold367	chr-9	+	36931	6541	8537	63789909	11275602	11277424
scaffold800	chr-9	+	16713	69	267	63789909	11371750	11371948
scaffold2460	chr-9	-	3427	34	3272	63789909	2528357	11911999
scaffold1494	chr-9	+	2166	1634	2143	63789909	11604966	11605483
scaffold2060	chr-9	+	259005	8263	246725	63789909	2528160	61255234
scaffold547	chr-9	+	219963	16667	153264	63789909	9375777	38225510
scaffold85	chr-9	-	945974	53396	872215	63789909	646099	62387002
scaffold20	chr-9	+	2236180	12461	2217273	63789909	476133	62809714
scaffold2305	chr-9	-	8728	7754	8542	63789909	11376722	14783138
scaffold2287	chr-9	-	9782	91	531	63789909	2953756	38381241
scaffold1306	chr-9	+	3986	2920	3920	63789909	9998914	30298292
scaffold1059	chr-9	+	6349	74	1101	63789909	14595744	14596803
scaffold345	chr-9	-	59307	17554	30281	63789909	1268285	26860181
scaffold519	chr-9	+	1175	223	1165	63789909	14940179	14941348
scaffold520	chr-9	-	1148	1	690	63789909	15731976	15732615
scaffold39	chr-9	+	1529838	68701	1515839	63789909	1655967	61912362
scaffold978	chr-9	+	8504	3760	4026	63789909	15965084	15965349
scaffold1598	chr-9	-	1794	1110	1392	63789909	16038723	16098184
scaffold348	chr-9	+	57651	9724	39571	63789909	13014245	46390777
scaffold1276	chr-9	-	4234	1208	2307	63789909	5014505	21012738
scaffold2357	chr-9	-	6230	936	6227	63789909	17099714	17101290
scaffold583	chr-9	+	118257	32094	82826	63789909	2805110	62079902
scaffold13	chr-9	+	2739815	101697	2567945	63789909	452805	59796982
scaffold187	chr-9	+	317791	54465	301174	63789909	4247544	52556922
scaffold650	chr-9	+	42298	26529	40687	63789909	6364218	33075467
scaffold682	chr-9	+	33932	57	32289	63789909	6598915	40077509
scaffold303	chr-9	-	101471	52701	100839	63789909	4509655	46651173
scaffold1563	chr-9	-	1909	1765	1857	63789909	20986108	20986176
scaffold2139	chr-9	-	40764	27718	30460	63789909	18236043	24864326
scaffold2598	chr-9	-	1344	526	757	63789909	8345642	36077423
scaffold1005	chr-9	+	7397	978	5965	63789909	2300234	61827896
scaffold457	chr-9	+	5448	4273	5312	63789909	21975028	21976069
scaffold1037	chr-9	+	6664	3890	6435	63789909	465164	43933519
scaffold14	chr-9	+	2693553	65302	2693231	63789909	1093674	59666764
scaffold1324	chr-9	-	3814	1656	3035	63789909	22968543	22970816
scaffold219	chr-9	+	232399	38449	231904	63789909	1422715	31167205
scaffold960	chr-9	+	8917	1085	8904	63789909	6380672	44172447
scaffold733	chr-9	+	23370	122	23368	63789909	10327928	51524660
scaffold144	chr-9	+	466854	47	459065	63789909	4243648	61912355
scaffold615	chr-9	+	64354	132	57752	63789909	4314349	40546425
scaffold2538	chr-9	+	2064	20	670	63789909	629801	46287702
scaffold466	chr-9	-	4610	3831	4108	63789909	25101651	25101922
scaffold2517	chr-9	+	2318	699	1932	63789909	25134180	25135428
scaffold570	chr-9	+	154457	32208	152714	63789909	4171092	39047515
scaffold1358	chr-9	+	3179	256	780	63789909	25784711	25785273
scaffold332	chr-9	-	74567	6987	30843	63789909	1937922	43270434
scaffold185	chr-9	-	318946	9691	304437	63789909	6917461	62717997
scaffold621	chr-9	+	60893	4592	60862	63789909	11431430	50105988
scaffold1205	chr-9	-	4760	224	1031	63789909	26584255	26585147
scaffold1678	chr-9	-	1628	1407	1454	63789909	26752997	26753056
scaffold2094	chr-9	+	81425	52308	66359	63789909	9379882	27158326
scaffold1277	chr-9	-	4232	450	929	63789909	16557039	33049367
scaffold316	chr-9	+	87825	67633	77084	63789909	4300789	55533349
scaffold1018	chr-9	+	7150	4066	5273	63789909	16918401	39935948
scaffold1498	chr-9	-	2160	321	1704	63789909	19906079	34169320
scaffold2584	chr-9	+	1497	39	203	63789909	27366171	27366324
scaffold1633	chr-9	+	1710	823	1619	63789909	27426875	27427673
scaffold2128	chr-9	+	47768	33560	41641	63789909	26339699	36938965
scaffold1136	chr-9	-	5468	4396	4593	63789909	29257369	29257563
scaffold685	chr-9	-	32158	3095	14529	63789909	8462274	50076368
scaffold26	chr-9	+	1946189	18107	1927739	63789909	6872261	61547289
scaffold1076	chr-9	-	6055	2354	2555	63789909	25794026	33962397
scaffold1696	chr-9	+	1577	9	769	63789909	2992372	57599453
scaffold734	chr-9	+	23048	12952	22731	63789909	23822263	50703758
scaffold1280	chr-9	+	4218	3533	3845	63789909	30959185	30959493
scaffold2359	chr-9	+	3637	2120	3062	63789909	31084829	31085790
scaffold2009	chr-9	-	1069	800	1050	63789909	16224286	55107169
scaffold1977	chr-9	-	1127	303	986	63789909	32259887	32260549
scaffold38	chr-9	-	1536774	287	1532316	63789909	4171092	61912366
scaffold203	chr-9	+	268118	6342	263926	63789909	4694379	60681329
scaffold1185	chr-9	-	4925	20	756	63789909	13435584	53140155
scaffold61	chr-9	+	1214947	17357	1087722	63789909	2953730	59623457
scaffold1210	chr-9	+	4733	4100	4704	63789909	33280789	33281362
scaffold2098	chr-9	-	76884	3898	72430	63789909	6144227	60541720
scaffold2100	chr-9	+	74093	9824	67887	63789909	19495884	43207585
scaffold1580	chr-9	+	1844	1316	1500	63789909	31785633	43222851
scaffold365	chr-9	+	38207	6897	10065	63789909	15964269	49346261
scaffold1083	chr-9	-	6004	4773	5809	63789909	34987384	35051288
scaffold636	chr-9	-	50036	36285	40050	63789909	35050135	35053920
scaffold211	chr-9	+	254436	9652	246452	63789909	16165406	58719560
scaffold1191	chr-9	+	4861	3406	4840	63789909	35542778	35544227
scaffold291	chr-9	-	113587	2114	107894	63789909	14909703	51761087
scaffold418	chr-9	+	9745	413	4204	63789909	31718711	36176157
scaffold1869	chr-9	+	1301	208	821	63789909	36076818	36077423
scaffold1168	chr-9	-	5114	269	2441	63789909	21163623	56154317
scaffold62	chr-9	+	1206224	1204	1184596	63789909	7477318	63536578
scaffold1325	chr-9	+	3797	2787	3024	63789909	38504194	38504427
scaffold112	chr-9	-	683706	15028	630878	63789909	1982014	55138024
scaffold974	chr-9	+	8698	1139	1461	63789909	38799419	38799764
scaffold1986	chr-9	-	1111	821	1103	63789909	39405089	39405372
scaffold265	chr-9	-	150473	48927	145546	63789909	38220578	59984151
scaffold399	chr-9	+	15202	1303	2126	63789909	40013803	40014594
scaffold633	chr-9	+	51058	3200	45823	63789909	2737063	47622404
scaffold2	chr-9	+	4436891	169776	4422484	63789909	2372744	63388056
scaffold1611	chr-9	-	1755	1134	1379	63789909	40365861	40366104
scaffold249	chr-9	-	177738	8665	116737	63789909	6600718	62604627
scaffold1484	chr-9	+	2243	1297	1805	63789909	41916138	41916628
scaffold351	chr-9	+	55051	15974	18733	63789909	31105099	56815115
scaffold820	chr-9	-	15890	7310	8229	63789909	42286405	42287338
scaffold1398	chr-9	-	2755	1077	2496	63789909	34827606	49698200
scaffold151	chr-9	+	456699	134237	440776	63789909	2699698	61732192
scaffold2314	chr-9	+	8279	1920	4987	63789909	44676953	44679723
scaffold385	chr-9	-	23316	186	7471	63789909	13593075	45477495
scaffold101	chr-9	+	783941	32177	757445	63789909	1170644	55825654
scaffold1237	chr-9	+	4522	1449	3410	63789909	22452271	48127582
scaffold1728	chr-9	+	1522	692	1115	63789909	10552232	55211269
scaffold1883	chr-9	-	1275	128	182	63789909	48923278	48923332
scaffold2533	chr-9	-	2109	1903	2094	63789909	49856002	49856596
scaffold1960	chr-9	+	1157	438	1146	63789909	50311289	50312042
scaffold396	chr-9	+	17025	2752	4107	63789909	50836470	50837980
scaffold174	chr-9	-	374751	7444	365639	63789909	1576951	56587928
scaffold451	chr-9	+	5647	3369	3680	63789909	48293537	60671286
scaffold1861	chr-9	-	1309	877	1065	63789909	52221661	52221851
scaffold896	chr-9	-	10728	7172	7400	63789909	52364499	52364727
scaffold2103	chr-9	+	70767	6123	66858	63789909	5645614	62604535
scaffold496	chr-9	-	1849	76	1551	63789909	54590766	54591676
scaffold2302	chr-9	-	6018	5188	5951	63789909	55749513	55750270
scaffold832	chr-9	-	14635	254	4770	63789909	55827735	62486705
scaffold2227	chr-9	-	17549	9359	13421	63789909	55348661	59987531
scaffold1627	chr-9	-	1715	584	1562	63789909	57274232	57275212
scaffold683	chr-9	-	33698	14554	29095	63789909	46327978	58030981
scaffold388	chr-9	+	20650	4107	19739	63789909	52210214	61732992
scaffold1249	chr-9	+	4460	210	610	63789909	60680925	60681337
scaffold2540	chr-9	-	2049	1216	1462	63789909	62406468	62406714
scaffold439	chr-10	+	6665	306	4297	54536456	588461	592889
scaffold1102	chr-10	-	5816	4998	5767	54536456	3096602	3097455
scaffold963	chr-10	+	8907	8227	8880	54536456	3644476	3645128
scaffold333	chr-10	+	73142	23221	65573	54536456	4139647	37822990
scaffold1000	chr-10	+	7506	236	510	54536456	8851529	8851795
scaffold1569	chr-10	+	1895	1332	1475	54536456	9848879	9849018
scaffold677	chr-10	-	35503	12909	25398	54536456	5839452	37136804
scaffold2138	chr-10	+	41243	27254	31167	54536456	12074569	12078165
scaffold32	chr-10	+	1729939	96344	1721058	54536456	3586099	52819378
scaffold749	chr-10	-	20478	7218	8360	54536456	12157047	12158305
scaffold776	chr-10	+	18199	3387	4406	54536456	12487107	12488117
scaffold2080	chr-10	+	122517	6624	121864	54536456	2092178	36889482
scaffold668	chr-10	+	37269	11798	35285	54536456	10158060	26442460
scaffold1731	chr-10	+	1516	1168	1470	54536456	13616524	13616826
scaffold1995	chr-10	+	1104	429	936	54536456	1236900	52866845
scaffold2559	chr-10	-	1447	6	1199	54536456	14293446	16148356
scaffold1257	chr-10	-	4339	445	1201	54536456	15448406	15449162
scaffold2284	chr-10	+	10140	7179	9918	54536456	15882442	15885211
scaffold1838	chr-10	-	1346	14	555	54536456	11188849	23495318
scaffold549	chr-10	+	217636	51240	159546	54536456	2652191	49971148
scaffold795	chr-10	-	16937	14265	14676	54536456	17135229	17135640
scaffold2174	chr-10	-	27881	12319	13926	54536456	10305340	28336171
scaffold1510	chr-10	+	2113	1683	2066	54536456	15237418	19907328
scaffold1182	chr-10	+	4954	3895	4912	54536456	18725809	18726913
scaffold2392	chr-10	+	4977	4064	4973	54536456	18732794	18733701
scaffold645	chr-10	+	44019	1672	37720	54536456	9101366	44362068
scaffold379	chr-10	+	25832	17698	19791	54536456	18985173	18987326
scaffold843	chr-10	+	13415	4162	9430	54536456	17494674	26767548
scaffold981	chr-10	-	8480	16	3002	54536456	19907157	19909982
scaffold299	chr-10	-	104045	19854	63640	54536456	3469444	52173876
scaffold1999	chr-10	+	1096	826	1069	54536456	20381673	20381980
scaffold469	chr-10	+	4443	2064	2844	54536456	11753976	27990985
scaffold311	chr-10	+	91046	5726	89966	54536456	15886160	54199821
scaffold619	chr-10	-	62492	11696	39841	54536456	8830060	22377884
scaffold240	chr-10	-	193071	10660	112110	54536456	10349106	27467138
scaffold534	chr-10	-	320610	23802	317080	54536456	2352697	45760953
scaffold618	chr-10	+	63491	39024	42101	54536456	3467466	41087777
scaffold236	chr-10	+	198676	15896	65490	54536456	157827	54189953
scaffold224	chr-10	+	217327	1300	186781	54536456	11343166	34581642
scaffold360	chr-10	-	47590	114	47445	54536456	14438803	39198412
scaffold306	chr-10	+	97881	34108	95726	54536456	3468220	41087885
scaffold2426	chr-10	-	4089	2733	3679	54536456	22525331	22526525
scaffold1980	chr-10	+	1121	828	1066	54536456	18476124	24571156
scaffold124	chr-10	-	561705	19201	514857	54536456	10318640	46317973
scaffold271	chr-10	-	140518	98615	128045	54536456	22158884	36014156
scaffold543	chr-10	-	268793	6813	265719	54536456	20058301	36112940
scaffold408	chr-10	-	12521	11448	12476	54536456	25680836	26218118
scaffold2390	chr-10	+	5057	409	1211	54536456	26071098	26071898
scaffold2412	chr-10	+	3089	1019	1731	54536456	26524673	26525441
scaffold1618	chr-10	+	1737	6	274	54536456	17109082	32463229
scaffold926	chr-10	-	9464	7924	7995	54536456	21640929	32047364
scaffold2471	chr-10	-	3107	6	3096	54536456	18662417	34972281
scaffold2058	chr-10	-	318556	50998	243568	54536456	7292800	43738953
scaffold724	chr-10	+	23943	4138	7089	54536456	23125837	31194636
scaffold1089	chr-10	+	5936	1981	4884	54536456	27174923	27178044
scaffold2018	chr-10	+	1053	620	1044	54536456	18731909	35331767
scaffold1725	chr-10	-	1524	1079	1186	54536456	27453885	27453992
scaffold467	chr-10	-	4537	3896	4534	54536456	27462577	27463288
scaffold464	chr-10	+	4825	105	3689	54536456	22311823	33790017
scaffold116	chr-10	+	640363	32592	639535	54536456	9708385	53617565
scaffold1200	chr-10	-	4789	9	933	54536456	28294445	28295470
scaffold28	chr-10	+	1900203	28967	1896808	54536456	361986	53968790
scaffold128	chr-10	-	526414	13522	487550	54536456	12410219	53065666
scaffold2198	chr-10	+	22107	991	17424	54536456	10327750	31595925
scaffold628	chr-10	-	53846	13766	51378	54536456	2273681	41937288
scaffold1040	chr-10	-	6642	4700	5435	54536456	29966199	29982010
scaffold1087	chr-10	-	5951	5353	5554	54536456	9930811	54029453
scaffold806	chr-10	-	16541	4660	6213	54536456	30501968	31060545
scaffold2267	chr-10	-	11305	10081	10923	54536456	30928207	30928992
scaffold383	chr-10	-	24509	12386	13742	54536456	30983337	31029127
scaffold243	chr-10	+	189422	10245	64582	54536456	19322006	53148507
scaffold180	chr-10	+	345662	82849	344832	54536456	2453398	46941969
scaffold996	chr-10	-	7644	1189	1358	54536456	31193084	31193253
scaffold1976	chr-10	-	1127	548	790	54536456	31414204	31414446
scaffold2318	chr-10	+	8093	73	2182	54536456	14521886	45589417
scaffold2541	chr-10	-	2042	1817	2024	54536456	18369544	44865452
scaffold927	chr-10	-	9402	8397	9190	54536456	29285373	32090418
scaffold855	chr-10	-	12734	1038	3934	54536456	12159855	34285087
scaffold968	chr-10	-	8841	341	1260	54536456	32055984	32056956
scaffold253	chr-10	+	171788	8672	85449	54536456	1701904	36191375
scaffold2110	chr-10	-	60378	55897	59000	54536456	32471342	32474368
scaffold609	chr-10	+	71915	10845	63278	54536456	4627298	52819291
scaffold956	chr-10	-	8939	3843	8848	54536456	18494413	50249324
scaffold2505	chr-10	+	2575	70	940	54536456	32711241	33175877
scaffold2205	chr-10	-	21133	18318	19234	54536456	32473435	38173047
scaffold962	chr-10	-	8913	6962	7357	54536456	36169192	36169587
scaffold335	chr-10	+	70685	2117	62667	54536456	266444	40885403
scaffold1170	chr-10	+	5102	43	828	54536456	37136218	37136997
scaffold1630	chr-10	-	1712	1467	1619	54536456	37140663	37140820
scaffold2275	chr-10	-	8302	4488	6801	54536456	37139941	37142111
scaffold2301	chr-10	+	8938	2755	4416	54536456	37140371	37141789
scaffold2200	chr-10	+	21708	2459	4945	54536456	37139943	37142268
scaffold2233	chr-10	-	16476	151	960	54536456	37142501	37143363
scaffold2523	chr-10	-	2292	251	577	54536456	37143961	37144281
scaffold1055	chr-10	-	6402	1735	2017	54536456	37145119	37145400
scaffold2536	chr-10	+	2078	885	1175	54536456	37145664	37145883
[truncated: 678 more rows]

## Sheet: Legend
Supplemental Data S2. Excel workbook containing association tables mapping contigs/scaffolds from the strain 105 H. vulgaris, H. oligactis, and H. viridissima genome assemblies to the strain AEP H. vulgaris reference.
