# Supplementary material for: A chromosome-scale epigenetic map of the Hydra genome reveals conserved regulators of cell state
Source: HighWire-hosted journal article supplement (doi:10.1101/gr.277040.122), 2023-01-13
Supplement: Supplemental_Data_S3.xlsx [file Supplemental_Data_S3.xlsx]

## Sheet: H3K4me1 Peaks
Chromosome	Start	Stop	Peak ID	Peak Score	Strand	Position Relative to Gene	Distance to TSS	Nearest Gene
chr-1	194239	195715	15	31367	.	Upstream	977	HVAEP1_G000009
chr-1	264561	265498	25	48611	.	Downstream	3333	HVAEP1_G000010
chr-1	265766	267111	26	43366	.	Downstream	1924	HVAEP1_G000010
chr-1	286291	287319	29	25039	.	Upstream	18443	HVAEP1_G000010
chr-1	401355	403630	35	39220	.	Upstream	36091	HVAEP1_G000011
chr-1	431409	433422	38	38742	.	Upstream	6168	HVAEP1_G000011
chr-1	435902	436442	40	35671	.	Upstream	2411	HVAEP1_G000011
chr-1	500521	501328	46	17405	.	Upstream	2300	HVAEP1_G000015
chr-1	590181	591215	58	27713	.	Upstream	11730	HVAEP1_G000017
chr-1	675359	676528	65	27743	.	PeakInsideFeature	16787	HVAEP1_G000019
chr-1	685451	686692	69	15191	.	PeakInsideFeature	26915	HVAEP1_G000019
chr-1	697921	703808	72	57379	.	Downstream	29867	HVAEP1_G000020
chr-1	806674	807626	81	33898	.	Upstream	2549	HVAEP1_G000022
chr-1	891151	891836	93	16016	.	Upstream	2087	HVAEP1_G000026
chr-1	1241193	1243464	106	58685	.	Upstream	10074	HVAEP1_G000036
chr-1	1244558	1245034	108	23219	.	Upstream	7606	HVAEP1_G000036
chr-1	2262846	2263143	131	15938	.	NA	NA	NA
chr-1	2270936	2272009	134	51256	.	NA	NA	NA
chr-1	3122401	3123113	153	18618	.	Upstream	19781	HVAEP1_G000072
chr-1	3266104	3266474	164	16260	.	Upstream	38673	HVAEP1_G000078
chr-1	3272389	3273275	165	16630	.	Upstream	45216	HVAEP1_G000078
chr-1	3273404	3275662	166	47005	.	Upstream	46917	HVAEP1_G000078
chr-1	4845501	4846005	187	23063	.	Upstream	1909	HVAEP1_G000152
chr-1	5027899	5029284	194	47997	.	Downstream	49159	HVAEP1_G000159
chr-1	5049369	5049626	199	24877	.	Downstream	70065	HVAEP1_G000159
chr-1	5084730	5085698	204	76444	.	Downstream	96093	HVAEP1_G000160
chr-1	5112705	5113914	207	37247	.	Downstream	67998	HVAEP1_G000160
chr-1	5195639	5196254	215	25329	.	Downstream	9774	HVAEP1_G000161
chr-1	5216450	5217594	220	24629	.	Upstream	11302	HVAEP1_G000161
chr-1	6503724	6504263	254	24318	.	Upstream	32019	HVAEP1_G000194
chr-1	6666190	6666671	263	17803	.	Upstream	30861	HVAEP1_G000197
chr-1	6831086	6832096	271	27393	.	PeakInsideFeature	5240	HVAEP1_G000200
chr-1	7190933	7191950	286	26527	.	Upstream	25464	HVAEP1_G000210
chr-1	7242937	7244251	287	73099	.	Downstream	26689	HVAEP1_G000210
chr-1	7244362	7245210	288	77153	.	Downstream	27881	HVAEP1_G000210
chr-1	7245363	7245963	289	103666	.	Downstream	28758	HVAEP1_G000210
chr-1	8659044	8660633	326	19272	.	Upstream	6632	HVAEP1_G000258
chr-1	8941754	8943131	339	14351	.	Downstream	19525	HVAEP1_G000264
chr-1	8999022	8999427	341	28523	.	Downstream	76307	HVAEP1_G000264
chr-1	9186724	9188094	343	25402	.	Upstream	7528	HVAEP1_G000265
chr-1	9218290	9218841	346	15993	.	Upstream	38684	HVAEP1_G000265
chr-1	9239085	9239660	349	19886	.	Upstream	59491	HVAEP1_G000265
chr-1	10808993	10809656	374	15016	.	Upstream	18650	HVAEP1_G000286
chr-1	11219890	11220760	383	15139	.	Upstream	12369	HVAEP1_G000299
chr-1	11522142	11524410	401	24630	.	Downstream	18625	HVAEP1_G000309
chr-1	12182089	12184762	413	40571	.	Downstream	57133	HVAEP1_G000329
chr-1	12270867	12271704	414	28218	.	Upstream	2928	HVAEP1_G000331
chr-1	12440573	12441042	415	15082	.	PeakInsideFeature	1941	HVAEP1_G000339
chr-1	13646088	13646599	440	17893	.	Upstream	75149	HVAEP1_G000367
chr-1	14860145	14861730	456	71839	.	Downstream	44718	HVAEP1_G000393
chr-1	14862054	14864238	457	222627	.	Downstream	46927	HVAEP1_G000393
chr-1	15032360	15033377	463	16147	.	Upstream	4191	HVAEP1_G000398
chr-1	15054326	15055032	465	22318	.	Upstream	8495	HVAEP1_G000400
chr-1	16455251	16455888	500	21877	.	Upstream	57897	HVAEP1_G000434
chr-1	16648179	16649038	501	20408	.	Upstream	38787	HVAEP1_G000441
chr-1	16702460	16703175	503	16746	.	Downstream	15422	HVAEP1_G000441
chr-1	17114069	17116324	523	40250	.	PeakInsideFeature	1581	HVAEP1_G000459
chr-1	17208733	17210105	537	40128	.	PeakInsideFeature	10892	HVAEP1_G000462
chr-1	17445540	17445992	543	17001	.	PeakInsideFeature	10603	HVAEP1_G000468
chr-1	17867484	17868677	563	20868	.	Upstream	14521	HVAEP1_G000479
chr-1	18810760	18812229	580	31048	.	OverlapStart	519	HVAEP1_G000509
chr-1	19053856	19055009	590	33966	.	Upstream	1210	HVAEP1_G000512
chr-1	19296251	19296777	607	19333	.	Downstream	23739	HVAEP1_G000519
chr-1	19327249	19327838	614	24377	.	Upstream	7290	HVAEP1_G000519
chr-1	19542131	19543548	620	17352	.	Upstream	25037	HVAEP1_G000525
chr-1	19857113	19858049	630	39076	.	Upstream	1231	HVAEP1_G000541
chr-1	19883311	19884849	638	56784	.	Upstream	8367	HVAEP1_G000542
chr-1	19901187	19901587	642	42993	.	Downstream	7667	HVAEP1_G000543
chr-1	19936635	19937510	644	24911	.	Upstream	24247	HVAEP1_G000544
chr-1	20018329	20020036	650	35745	.	FeatureInsidePeak	186	HVAEP1_G000551
chr-1	20020628	20021683	651	34037	.	Upstream	2159	HVAEP1_G000551
chr-1	20049368	20050977	659	30373	.	Downstream	14779	HVAEP1_G000552
chr-1	20057894	20059408	662	22444	.	Downstream	6300	HVAEP1_G000552
chr-1	20109800	20110344	668	25734	.	PeakInsideFeature	628	HVAEP1_G000554
chr-1	20111839	20112890	669	18021	.	Upstream	1664	HVAEP1_G000554
chr-1	20117245	20118837	671	73353	.	Upstream	7341	HVAEP1_G000554
chr-1	20164010	20167122	679	125065	.	PeakInsideFeature	3292	HVAEP1_G000557
chr-1	20805495	20806529	700	69761	.	PeakInsideFeature	7565	HVAEP1_G000578
chr-1	20889841	20890500	707	14670	.	PeakInsideFeature	1238	HVAEP1_G000587
chr-1	21057183	21058472	714	34723	.	Downstream	19869	HVAEP1_G000590
chr-1	21105343	21106612	720	25100	.	PeakInsideFeature	665	HVAEP1_G000591
chr-1	21128376	21129328	724	22681	.	OverlapEnd	5453	HVAEP1_G000592
chr-1	21129759	21131396	725	23810	.	PeakInsideFeature	3728	HVAEP1_G000592
chr-1	21286016	21287218	734	21618	.	PeakInsideFeature	607	HVAEP1_G000595
chr-1	21299335	21301203	735	36986	.	Downstream	14259	HVAEP1_G000595
chr-1	21316426	21320850	737	78375	.	OverlapStart	1018	HVAEP1_G000596
chr-1	21323339	21324456	738	27207	.	PeakInsideFeature	1427	HVAEP1_G000597
chr-1	21336656	21337810	740	20368	.	Downstream	9641	HVAEP1_G000598
chr-1	21347886	21348561	742	19398	.	Upstream	1349	HVAEP1_G000598
chr-1	21370448	21371188	746	21739	.	OverlapStart	119	HVAEP1_G000599
chr-1	21378522	21380249	747	41610	.	Downstream	4388	HVAEP1_G000600
chr-1	21380346	21380969	748	36219	.	Downstream	5660	HVAEP1_G000600
chr-1	21392231	21392672	752	15501	.	Downstream	4432	HVAEP1_G000602
chr-1	21723670	21728081	772	109303	.	Upstream	7325	HVAEP1_G000608
chr-1	21754379	21755076	777	21525	.	Upstream	25623	HVAEP1_G000609
chr-1	22168896	22169623	780	13853	.	PeakInsideFeature	22636	HVAEP1_G000616
chr-1	22421539	22422622	785	16915	.	Upstream	2092	HVAEP1_G000623
chr-1	22995189	22995663	802	17071	.	Upstream	4344	HVAEP1_G000632
chr-1	23387616	23388206	815	14998	.	Upstream	12157	HVAEP1_G000640
chr-1	23494934	23495238	824	15702	.	Upstream	6828	HVAEP1_G000641
chr-1	23556317	23556934	828	20954	.	Upstream	2503	HVAEP1_G000644
chr-1	23634867	23636236	836	31756	.	PeakInsideFeature	3837	HVAEP1_G000647
chr-1	23879166	23879713	843	14481	.	PeakInsideFeature	1457	HVAEP1_G000661
chr-1	23898987	23899727	844	14964	.	Downstream	7009	HVAEP1_G000662
chr-1	23922828	23923553	848	69655	.	Upstream	4393	HVAEP1_G000663
chr-1	23944738	23945560	853	19341	.	Upstream	26352	HVAEP1_G000663
chr-1	24127324	24128998	869	67519	.	Upstream	21459	HVAEP1_G000668
chr-1	24147334	24148936	873	35337	.	Upstream	1485	HVAEP1_G000668
chr-1	24149207	24150545	874	28828	.	OverlapStart	256	HVAEP1_G000668
chr-1	24182478	24183365	882	38977	.	Downstream	33301	HVAEP1_G000668
chr-1	24199187	24199866	887	16619	.	Downstream	49906	HVAEP1_G000668
chr-1	25097331	25099326	911	61293	.	Upstream	24676	HVAEP1_G000703
chr-1	25168068	25168743	915	16854	.	Downstream	45401	HVAEP1_G000703
chr-1	25909077	25909316	950	24402	.	Downstream	12506	HVAEP1_G000735
chr-1	26440236	26441840	962	42153	.	Upstream	15294	HVAEP1_G000751
chr-1	26497685	26498497	965	18935	.	Upstream	2060	HVAEP1_G000753
chr-1	26637044	26637731	967	22097	.	Downstream	1134	HVAEP1_G000757
chr-1	26639865	26640689	968	18348	.	OverlapStart	146	HVAEP1_G000758
chr-1	26641657	26642367	969	21503	.	Downstream	1881	HVAEP1_G000758
chr-1	27094344	27095500	999	27573	.	Upstream	4418	HVAEP1_G000770
chr-1	27102257	27104624	1001	55678	.	Upstream	12936	HVAEP1_G000770
chr-1	27126369	27127279	1002	15777	.	Upstream	15355	HVAEP1_G000771
chr-1	27182728	27184527	1010	40128	.	Downstream	25659	HVAEP1_G000772
chr-1	27258471	27259282	1011	22612	.	Downstream	9804	HVAEP1_G000774
chr-1	27328996	27330366	1017	17883	.	FeatureInsidePeak	198	HVAEP1_G000778
chr-1	27389211	27390248	1023	52512	.	Upstream	1983	HVAEP1_G000782
chr-1	27398046	27398877	1029	37138	.	PeakInsideFeature	6749	HVAEP1_G000782
chr-1	27458999	27459599	1037	66819	.	Upstream	3691	HVAEP1_G000783
chr-1	27469448	27469856	1039	18109	.	PeakInsideFeature	522	HVAEP1_G000783
chr-1	27470559	27471129	1040	17328	.	Upstream	670	HVAEP1_G000783
chr-1	27481060	27482367	1045	20187	.	OverlapStart	353	HVAEP1_G000784
chr-1	27501939	27502436	1047	27706	.	Upstream	19590	HVAEP1_G000785
chr-1	27504515	27506874	1050	52463	.	Upstream	16083	HVAEP1_G000785
chr-1	27511649	27512920	1052	60237	.	Upstream	9493	HVAEP1_G000785
chr-1	27520219	27520776	1055	31065	.	Upstream	1280	HVAEP1_G000785
chr-1	27530434	27532330	1058	65714	.	Downstream	9605	HVAEP1_G000785
chr-1	27639562	27640358	1061	18235	.	Upstream	6143	HVAEP1_G000792
chr-1	27641080	27641784	1062	16979	.	Upstream	4671	HVAEP1_G000792
chr-1	27832110	27834170	1073	46908	.	Upstream	5084	HVAEP1_G000799
chr-1	27844514	27845136	1077	50241	.	Upstream	16769	HVAEP1_G000799
chr-1	27850404	27851905	1078	30596	.	Upstream	23098	HVAEP1_G000799
chr-1	28012550	28013126	1092	36642	.	Upstream	21968	HVAEP1_G000805
chr-1	28037516	28038432	1098	30315	.	Upstream	23860	HVAEP1_G000806
chr-1	28086879	28087571	1100	33219	.	Upstream	16728	HVAEP1_G000808
chr-1	28269325	28272313	1106	61509	.	FeatureInsidePeak	934	HVAEP1_G000813
chr-1	28342580	28343167	1110	19566	.	OverlapStart	181	HVAEP1_G000821
chr-1	28374686	28375671	1111	18078	.	Upstream	779	HVAEP1_G000823
chr-1	28413756	28414323	1116	14767	.	Upstream	12401	HVAEP1_G000825
chr-1	28530483	28531837	1124	16690	.	Upstream	39113	HVAEP1_G000827
chr-1	28845980	28846810	1132	15694	.	Upstream	8299	HVAEP1_G000841
chr-1	28847132	28848031	1133	26881	.	Upstream	9485	HVAEP1_G000841
chr-1	28877712	28878197	1134	14309	.	Upstream	16301	HVAEP1_G000842
chr-1	28976426	28977155	1148	30041	.	PeakInsideFeature	21465	HVAEP1_G000845
chr-1	28977310	28978460	1149	27209	.	PeakInsideFeature	20370	HVAEP1_G000845
chr-1	28989629	28990752	1152	16353	.	PeakInsideFeature	8065	HVAEP1_G000845
chr-1	28993816	28996189	1155	23447	.	PeakInsideFeature	3253	HVAEP1_G000845
chr-1	29088918	29089667	1160	17126	.	Upstream	12562	HVAEP1_G000847
chr-1	29136102	29137972	1165	52789	.	Upstream	1718	HVAEP1_G000849
chr-1	29140171	29142160	1167	60625	.	PeakInsideFeature	2410	HVAEP1_G000849
chr-1	29155147	29155522	1169	16746	.	OverlapStart	74	HVAEP1_G000850
chr-1	29214405	29215322	1175	18580	.	OverlapStart	94	HVAEP1_G000856
chr-1	29395700	29396453	1179	20531	.	PeakInsideFeature	3326	HVAEP1_G000863
chr-1	29416132	29417863	1189	74947	.	Upstream	11016	HVAEP1_G000864
chr-1	29421373	29422445	1192	27879	.	Upstream	6104	HVAEP1_G000864
chr-1	29428486	29429119	1193	20561	.	PeakInsideFeature	789	HVAEP1_G000864
chr-1	29549585	29549975	1202	14859	.	Upstream	9723	HVAEP1_G000868
chr-1	29551763	29553147	1205	30952	.	Upstream	7048	HVAEP1_G000868
chr-1	29555296	29556554	1207	42559	.	Upstream	3578	HVAEP1_G000868
chr-1	29557068	29558442	1208	95300	.	Upstream	1748	HVAEP1_G000868
chr-1	29670510	29671620	1215	16839	.	Upstream	1449	HVAEP1_G000876
chr-1	29725143	29726187	1218	14843	.	OverlapEnd	929	HVAEP1_G000879
chr-1	29796807	29797574	1225	14148	.	Upstream	10536	HVAEP1_G000885
chr-1	29867662	29868929	1230	23721	.	Upstream	1698	HVAEP1_G000887
chr-1	29886404	29887854	1237	20680	.	Downstream	3170	HVAEP1_G000888
chr-1	29962928	29963945	1249	34940	.	Downstream	25062	HVAEP1_G000890
chr-1	29999046	29999607	1252	14119	.	PeakInsideFeature	786	HVAEP1_G000892
chr-1	30001196	30001762	1253	14838	.	Upstream	1367	HVAEP1_G000892
chr-1	30042932	30043610	1263	17960	.	Downstream	16924	HVAEP1_G000893
chr-1	30111457	30112500	1272	28208	.	Upstream	3931	HVAEP1_G000895
chr-1	30457765	30459508	1291	60233	.	Upstream	7186	HVAEP1_G000909
chr-1	30507579	30508616	1295	46071	.	Upstream	16576	HVAEP1_G000910
chr-1	30508870	30509567	1296	42167	.	Upstream	17697	HVAEP1_G000910
chr-1	30547864	30548170	1301	16263	.	Upstream	56496	HVAEP1_G000910
chr-1	30560620	30562655	1302	29178	.	Upstream	70116	HVAEP1_G000910
chr-1	30593522	30594175	1303	18102	.	Downstream	68987	HVAEP1_G000911
chr-1	30595380	30595835	1304	16017	.	Downstream	67228	HVAEP1_G000911
chr-1	30657324	30658134	1308	24422	.	Downstream	5106	HVAEP1_G000911
chr-1	30676333	30677250	1314	19850	.	Upstream	7721	HVAEP1_G000912
chr-1	30677792	30679404	1315	72887	.	Upstream	5914	HVAEP1_G000912
chr-1	30682482	30683464	1317	59758	.	Upstream	1539	HVAEP1_G000912
chr-1	30708199	30710514	1323	150423	.	Downstream	6691	HVAEP1_G000913
chr-1	30712220	30713491	1326	71141	.	Downstream	3192	HVAEP1_G000913
chr-1	30741052	30742558	1328	48728	.	Upstream	25758	HVAEP1_G000913
chr-1	30769465	30770313	1333	24425	.	PeakInsideFeature	5912	HVAEP1_G000914
chr-1	30775893	30776690	1336	15946	.	Upstream	490	HVAEP1_G000914
chr-1	30779114	30779511	1338	20508	.	Upstream	3511	HVAEP1_G000914
chr-1	30806391	30806950	1343	44506	.	PeakInsideFeature	27902	HVAEP1_G000915
chr-1	30835818	30837342	1345	24607	.	Upstream	2008	HVAEP1_G000915
chr-1	30843471	30844252	1346	42826	.	Downstream	2517	HVAEP1_G000916
chr-1	30881244	30882054	1349	18215	.	Downstream	26563	HVAEP1_G000917
chr-1	30897321	30898056	1356	72185	.	Downstream	10524	HVAEP1_G000917
chr-1	30929551	30931194	1360	35611	.	Upstream	22160	HVAEP1_G000917
chr-1	30950077	30950872	1363	17651	.	Downstream	4020	HVAEP1_G000918
chr-1	30966034	30967111	1366	29255	.	Upstream	11666	HVAEP1_G000919
chr-1	30967628	30969719	1367	50114	.	Upstream	13767	HVAEP1_G000919
chr-1	30982856	30983331	1371	41345	.	Upstream	28187	HVAEP1_G000919
chr-1	31027487	31028248	1381	131375	.	Downstream	11678	HVAEP1_G000920
chr-1	31031300	31032765	1382	23193	.	Downstream	7513	HVAEP1_G000920
chr-1	31034368	31035374	1384	21575	.	Downstream	4674	HVAEP1_G000920
chr-1	31225585	31228905	1393	91877	.	OverlapEnd	3533	HVAEP1_G000925
chr-1	31248109	31248731	1397	47851	.	Downstream	7589	HVAEP1_G000930
chr-1	31258995	31259963	1398	26840	.	Upstream	3237	HVAEP1_G000931
chr-1	31279888	31280680	1404	22650	.	Downstream	10141	HVAEP1_G000932
chr-1	31305593	31306373	1409	22361	.	PeakInsideFeature	1866	HVAEP1_G000934
chr-1	31399745	31400644	1420	24677	.	Downstream	16699	HVAEP1_G000937
chr-1	31400758	31402330	1421	49620	.	Downstream	18049	HVAEP1_G000937
chr-1	31414868	31417154	1423	40939	.	PeakInsideFeature	4444	HVAEP1_G000938
chr-1	31420410	31421719	1426	45060	.	OverlapStart	609	HVAEP1_G000938
chr-1	31424482	31425177	1428	29585	.	PeakInsideFeature	1261	HVAEP1_G000938
chr-1	31425449	31427457	1429	58547	.	OverlapStart	363	HVAEP1_G000938
chr-1	31429476	31429807	1430	13357	.	OverlapStart	15	HVAEP1_G000938
chr-1	31660912	31661845	1457	28843	.	Upstream	4589	HVAEP1_G000953
chr-1	31665593	31666322	1459	22766	.	OverlapStart	10	HVAEP1_G000953
chr-1	31666424	31667588	1460	33974	.	OverlapStart	495	HVAEP1_G000953
chr-1	31669897	31671523	1462	22403	.	PeakInsideFeature	2098	HVAEP1_G000953
chr-1	31671873	31672908	1463	31518	.	PeakInsideFeature	3778	HVAEP1_G000953
chr-1	31678982	31680469	1466	62486	.	Upstream	3528	HVAEP1_G000954
chr-1	31737527	31739391	1471	33370	.	OverlapStart	469	HVAEP1_G000956
chr-1	31740020	31743916	1472	97286	.	FeatureInsidePeak	898	HVAEP1_G000957
chr-1	31824512	31825287	1482	14927	.	Downstream	18028	HVAEP1_G000962
chr-1	31874682	31877424	1487	48547	.	Upstream	5680	HVAEP1_G000963
chr-1	31877798	31879128	1488	51955	.	Upstream	8090	HVAEP1_G000963
chr-1	31894349	31894859	1492	46860	.	Downstream	2547	HVAEP1_G000964
chr-1	32087527	32088203	1504	20872	.	Downstream	19883	HVAEP1_G000980
chr-1	32197304	32199297	1514	64828	.	Upstream	1994	HVAEP1_G000987
chr-1	32225857	32228304	1519	29910	.	OverlapStart	862	HVAEP1_G000988
chr-1	32276892	32278587	1523	32978	.	Upstream	51521	HVAEP1_G000988
chr-1	32318005	32319056	1527	38156	.	Upstream	25980	HVAEP1_G000990
chr-1	32340871	32341774	1529	24537	.	Upstream	3188	HVAEP1_G000990
chr-1	32362366	32362857	1532	38053	.	Upstream	604	HVAEP1_G000993
chr-1	32363009	32363405	1533	20713	.	OverlapStart	8	HVAEP1_G000993
chr-1	32380058	32381066	1537	26191	.	Upstream	11327	HVAEP1_G000992
chr-1	32397232	32397848	1545	18676	.	OverlapStart	171	HVAEP1_G000993
chr-1	32460422	32461560	1553	37552	.	PeakInsideFeature	6361	HVAEP1_G000994
chr-1	32461702	32463539	1554	79018	.	PeakInsideFeature	7990	HVAEP1_G000994
chr-1	32464812	32465496	1556	62430	.	OverlapEnd	10524	HVAEP1_G000994
chr-1	32472056	32473771	1560	35870	.	Upstream	9039	HVAEP1_G000995
chr-1	32478063	32478549	1563	19866	.	Upstream	3646	HVAEP1_G000995
chr-1	32481034	32482203	1565	46086	.	OverlapStart	334	HVAEP1_G000995
chr-1	32490597	32491306	1569	62676	.	PeakInsideFeature	965	HVAEP1_G000996
chr-1	32499118	32499998	1573	13766	.	PeakInsideFeature	9572	HVAEP1_G000996
chr-1	32508906	32511273	1575	46378	.	OverlapStart	119	HVAEP1_G000997
chr-1	32546796	32547558	1581	20979	.	Upstream	14730	HVAEP1_G000998
chr-1	32606682	32608689	1591	72758	.	Downstream	2712	HVAEP1_G001001
chr-1	32875247	32875665	1605	31654	.	PeakInsideFeature	15779	HVAEP1_G001021
chr-1	33027034	33027887	1616	26665	.	Downstream	28835	HVAEP1_G001028
chr-1	33028676	33029713	1617	70057	.	Downstream	30569	HVAEP1_G001028
chr-1	33030161	33031701	1618	29268	.	Downstream	32306	HVAEP1_G001028
chr-1	33034214	33036407	1619	40559	.	Upstream	28465	HVAEP1_G001029
chr-1	33036693	33038226	1620	36284	.	Upstream	26316	HVAEP1_G001029
chr-1	33047869	33048179	1622	15242	.	Upstream	15751	HVAEP1_G001029
chr-1	33321627	33322803	1641	19922	.	Upstream	3615	HVAEP1_G001039
chr-1	33324872	33325687	1643	35809	.	Upstream	551	HVAEP1_G001039
chr-1	33407752	33408869	1645	25618	.	Downstream	3618	HVAEP1_G001040
chr-1	33442689	33443121	1653	27514	.	Downstream	10976	HVAEP1_G001042
chr-1	33445089	33445770	1654	14976	.	Downstream	8452	HVAEP1_G001042
chr-1	33447013	33447990	1655	44214	.	Downstream	6380	HVAEP1_G001042
chr-1	33476432	33477946	1663	30199	.	PeakInsideFeature	9404	HVAEP1_G001043
chr-1	33488304	33489423	1668	47170	.	Upstream	1325	HVAEP1_G001044
chr-1	33489723	33490656	1669	21692	.	OverlapStart	1	HVAEP1_G001044
chr-1	33506886	33508446	1670	49491	.	Downstream	17478	HVAEP1_G001044
chr-1	33533621	33535069	1684	61911	.	Upstream	7193	HVAEP1_G001045
chr-1	33535178	33535601	1685	58151	.	Upstream	6149	HVAEP1_G001045
chr-1	33539461	33540921	1686	91442	.	Upstream	1347	HVAEP1_G001045
chr-1	33541603	33542913	1687	29996	.	PeakInsideFeature	720	HVAEP1_G001045
chr-1	33828871	33829595	1698	28617	.	Upstream	2176	HVAEP1_G001060
chr-1	33877041	33877786	1705	19070	.	PeakInsideFeature	5702	HVAEP1_G001061
chr-1	33879222	33880652	1707	36984	.	PeakInsideFeature	3178	HVAEP1_G001061
chr-1	33884152	33885462	1709	54566	.	OverlapStart	412	HVAEP1_G001062
chr-1	33885700	33886993	1710	18808	.	Downstream	1127	HVAEP1_G001062
chr-1	34083385	34084213	1720	16613	.	PeakInsideFeature	605	HVAEP1_G001067
chr-1	34085219	34086878	1721	38623	.	Upstream	1644	HVAEP1_G001067
chr-1	34133004	34135406	1723	27112	.	PeakInsideFeature	2693	HVAEP1_G001068
chr-1	34190088	34191633	1731	47843	.	Downstream	2438	HVAEP1_G001072
chr-1	34215020	34215686	1733	20060	.	Upstream	973	HVAEP1_G001074
chr-1	34307943	34309220	1738	107290	.	FeatureInsidePeak	89	HVAEP1_G001078
chr-1	34406221	34408141	1748	60122	.	Upstream	14054	HVAEP1_G001082
chr-1	34408291	34409109	1749	39820	.	Upstream	12535	HVAEP1_G001082
chr-1	34410650	34411476	1751	17835	.	Upstream	10172	HVAEP1_G001082
chr-1	34426430	34427637	1756	52541	.	Downstream	5798	HVAEP1_G001082
chr-1	34428440	34431468	1757	114032	.	Downstream	6006	HVAEP1_G001083
chr-1	34432903	34434626	1758	60293	.	PeakInsideFeature	2196	HVAEP1_G001083
chr-1	34438343	34438833	1760	26597	.	PeakInsideFeature	771	HVAEP1_G001083
chr-1	34438924	34439381	1761	20245	.	OverlapStart	207	HVAEP1_G001083
chr-1	34894795	34895744	1779	24360	.	OverlapStart	69	HVAEP1_G001092
chr-1	35738341	35739157	1803	17879	.	Downstream	7043	HVAEP1_G001102
chr-1	35757271	35758471	1810	39886	.	Upstream	3102	HVAEP1_G001103
chr-1	35863896	35864478	1819	21033	.	Upstream	629	HVAEP1_G001106
chr-1	35864572	35865613	1820	23599	.	FeatureInsidePeak	276	HVAEP1_G001106
chr-1	35896672	35897500	1828	43314	.	Upstream	14942	HVAEP1_G001110
chr-1	35906470	35907181	1831	268789	.	Upstream	5203	HVAEP1_G001110
chr-1	35926493	35927062	1836	15290	.	Upstream	339	HVAEP1_G001111
chr-1	35927275	35927879	1837	26117	.	PeakInsideFeature	461	HVAEP1_G001111
chr-1	36145479	36146756	1859	34341	.	Downstream	3938	HVAEP1_G001116
chr-1	36180481	36181237	1865	23447	.	Upstream	3993	HVAEP1_G001119
chr-1	36443017	36443916	1878	26656	.	OverlapStart	199	HVAEP1_G001124
chr-1	36480880	36484354	1885	211765	.	FeatureInsidePeak	179	HVAEP1_G001128
chr-1	36664524	36665525	1892	17411	.	OverlapStart	281	HVAEP1_G001132
chr-1	36738903	36740936	1895	87676	.	Upstream	4467	HVAEP1_G001135
chr-1	36741559	36743176	1896	24330	.	Upstream	2019	HVAEP1_G001135
chr-1	36744401	36746867	1897	39871	.	PeakInsideFeature	1248	HVAEP1_G001135
chr-1	36867798	36868889	1907	23221	.	OverlapStart	160	HVAEP1_G001140
chr-1	36877772	36878534	1910	24072	.	Upstream	5271	HVAEP1_G001141
chr-1	36915033	36916595	1915	35309	.	Upstream	8600	HVAEP1_G001142
chr-1	37398542	37400036	1949	182473	.	Upstream	5441	HVAEP1_G001157
chr-1	37418253	37420248	1952	73726	.	Upstream	11319	HVAEP1_G001158
chr-1	37481950	37482947	1960	18232	.	Upstream	5596	HVAEP1_G001162
chr-1	37658548	37659604	1984	24999	.	Downstream	6499	HVAEP1_G001168
chr-1	37660181	37661635	1985	18139	.	Downstream	4667	HVAEP1_G001168
chr-1	37725772	37727389	1991	21439	.	Upstream	8246	HVAEP1_G001169
chr-1	37769090	37770617	1998	22157	.	FeatureInsidePeak	8	HVAEP1_G001170
chr-1	38084186	38084723	2018	17703	.	Upstream	718	HVAEP1_G001183
chr-1	38113312	38113701	2023	14686	.	Downstream	5731	HVAEP1_G001186
chr-1	38200018	38200565	2030	29977	.	Downstream	12273	HVAEP1_G001189
chr-1	38246131	38248208	2036	34473	.	Downstream	9811	HVAEP1_G001192
chr-1	38354724	38355129	2053	24422	.	Upstream	638	HVAEP1_G001199
chr-1	38506765	38509002	2062	63640	.	Upstream	11337	HVAEP1_G001201
chr-1	38544174	38544806	2070	39695	.	OverlapStart	189	HVAEP1_G001203
chr-1	38545587	38546117	2071	31510	.	PeakInsideFeature	1173	HVAEP1_G001203
chr-1	38587400	38588006	2078	21395	.	Downstream	38036	HVAEP1_G001203
chr-1	38588113	38588664	2079	19255	.	Downstream	38721	HVAEP1_G001203
chr-1	38613967	38615204	2085	52332	.	Downstream	38063	HVAEP1_G001204
chr-1	38618706	38623020	2089	105830	.	OverlapEnd	31785	HVAEP1_G001204
chr-1	38717145	38717992	2104	25724	.	Upstream	7582	HVAEP1_G001205
chr-1	38718682	38720524	2106	81839	.	Upstream	9617	HVAEP1_G001205
chr-1	38728210	38729595	2109	27016	.	Upstream	18317	HVAEP1_G001206
chr-1	38745475	38747541	2112	65376	.	OverlapStart	711	HVAEP1_G001206
chr-1	38806764	38807370	2117	14639	.	Upstream	1203	HVAEP1_G001209
chr-1	38963220	38963914	2125	17271	.	Upstream	1152	HVAEP1_G001214
chr-1	39065129	39066843	2139	34617	.	OverlapStart	350	HVAEP1_G001217
chr-1	39067992	39068484	2141	19209	.	Upstream	1902	HVAEP1_G001217
chr-1	39086567	39087442	2150	20912	.	Upstream	20668	HVAEP1_G001217
chr-1	39239649	39241383	2158	34149	.	Upstream	9148	HVAEP1_G001220
chr-1	39519322	39520122	2169	16961	.	Upstream	14098	HVAEP1_G001227
chr-1	39933649	39934839	2179	26078	.	PeakInsideFeature	876	HVAEP1_G001234
chr-1	40058761	40060540	2189	34268	.	Upstream	52527	HVAEP1_G001236
chr-1	40066020	40066700	2194	29979	.	Upstream	45817	HVAEP1_G001236
chr-1	40131827	40132883	2211	21197	.	Upstream	5275	HVAEP1_G001240
chr-1	40133015	40133813	2212	28185	.	Upstream	4216	HVAEP1_G001240
chr-1	40289876	40290638	2229	14884	.	Upstream	6016	HVAEP1_G001245
chr-1	40386750	40387717	2238	17191	.	Upstream	5204	HVAEP1_G001247
chr-1	40559464	40559966	2251	17214	.	OverlapStart	133	HVAEP1_G001251
chr-1	40724542	40726281	2260	19077	.	Downstream	6198	HVAEP1_G001258
chr-1	40730169	40731236	2262	21443	.	PeakInsideFeature	907	HVAEP1_G001258
chr-1	40733173	40735318	2264	51727	.	PeakInsideFeature	2588	HVAEP1_G001258
chr-1	40735611	40736525	2265	32878	.	PeakInsideFeature	765	HVAEP1_G001258
chr-1	40736656	40737303	2266	16381	.	OverlapStart	146	HVAEP1_G001258
chr-1	40859897	40862640	2271	44733	.	Upstream	20590	HVAEP1_G001264
chr-1	41029319	41030868	2282	34232	.	Downstream	18161	HVAEP1_G001268
chr-1	41048562	41049106	2287	43850	.	Downstream	19454	HVAEP1_G001269
chr-1	41154086	41155026	2297	21636	.	Upstream	1732	HVAEP1_G001277
chr-1	41408323	41409558	2305	17384	.	Downstream	17865	HVAEP1_G001282
chr-1	41452854	41454419	2309	30775	.	PeakInsideFeature	2470	HVAEP1_G001283
chr-1	41549227	41549990	2319	15068	.	PeakInsideFeature	481	HVAEP1_G001289
chr-1	41589355	41590200	2321	24107	.	Downstream	7520	HVAEP1_G001290
chr-1	41670702	41672579	2335	59773	.	Downstream	6870	HVAEP1_G001292
chr-1	41872330	41875017	2345	48409	.	PeakInsideFeature	5551	HVAEP1_G001296
chr-1	41883126	41885130	2346	93614	.	PeakInsideFeature	1871	HVAEP1_G001297
chr-1	41984783	41985326	2348	37061	.	Downstream	21160	HVAEP1_G001298
chr-1	42146098	42147743	2365	33245	.	Downstream	2765	HVAEP1_G001301
chr-1	42244880	42245403	2372	20904	.	Downstream	5434	HVAEP1_G001303
chr-1	42252682	42254032	2376	22143	.	Upstream	2782	HVAEP1_G001303
chr-1	42344963	42345938	2382	44451	.	PeakInsideFeature	2814	HVAEP1_G001307
chr-1	42346111	42346514	2383	17570	.	PeakInsideFeature	1952	HVAEP1_G001307
chr-1	42347377	42348345	2384	28383	.	OverlapStart	403	HVAEP1_G001307
chr-1	42350065	42351992	2385	20317	.	Upstream	2764	HVAEP1_G001307
chr-1	42360273	42360589	2386	15929	.	Downstream	4929	HVAEP1_G001308
chr-1	42366677	42370686	2390	106017	.	FeatureInsidePeak	1565	HVAEP1_G001309
chr-1	42371342	42372276	2391	28923	.	Downstream	4693	HVAEP1_G001309
chr-1	42474317	42475274	2394	21847	.	Downstream	2184	HVAEP1_G001311
chr-1	42587194	42588981	2396	27699	.	PeakInsideFeature	11664	HVAEP1_G001313
chr-1	42593224	42594064	2399	21695	.	PeakInsideFeature	6107	HVAEP1_G001313
chr-1	42597009	42598512	2402	30880	.	PeakInsideFeature	1991	HVAEP1_G001313
chr-1	42599321	42600682	2404	22744	.	OverlapStart	250	HVAEP1_G001313
chr-1	42953278	42955051	2416	38794	.	OverlapStart	548	HVAEP1_G001323
chr-1	42979840	42980769	2419	28946	.	Downstream	6957	HVAEP1_G001324
chr-1	43013240	43013737	2423	23979	.	Downstream	8726	HVAEP1_G001325
chr-1	43022331	43023386	2425	26378	.	Upstream	644	HVAEP1_G001325
chr-1	43024109	43025376	2426	23156	.	Upstream	2528	HVAEP1_G001325
chr-1	43025469	43026852	2427	50605	.	Upstream	3946	HVAEP1_G001325
chr-1	43026998	43027907	2428	35463	.	PeakInsideFeature	2951	HVAEP1_G001326
chr-1	43027995	43028863	2429	36972	.	PeakInsideFeature	1974	HVAEP1_G001326
chr-1	43028986	43029939	2430	26818	.	PeakInsideFeature	941	HVAEP1_G001326
chr-1	43031422	43032156	2432	22883	.	Upstream	1386	HVAEP1_G001326
chr-1	43032688	43033597	2433	28442	.	Upstream	2739	HVAEP1_G001326
chr-1	43231931	43234524	2441	34840	.	PeakInsideFeature	7109	HVAEP1_G001336
chr-1	43236727	43238150	2443	20441	.	PeakInsideFeature	2898	HVAEP1_G001336
chr-1	43377873	43379490	2455	24351	.	Upstream	9147	HVAEP1_G001341
chr-1	43509743	43510875	2469	44812	.	OverlapStart	557	HVAEP1_G001344
chr-1	43518329	43519584	2474	52903	.	Downstream	9204	HVAEP1_G001344
chr-1	43568716	43571142	2480	24936	.	Upstream	15931	HVAEP1_G001345
chr-1	43585942	43586344	2482	17971	.	Downstream	21648	HVAEP1_G001346
chr-1	43611815	43613304	2485	46402	.	PeakInsideFeature	1597	HVAEP1_G001346
chr-1	43622129	43622587	2490	30394	.	Upstream	8202	HVAEP1_G001346
chr-1	43635535	43636758	2495	19549	.	OverlapStart	270	HVAEP1_G001347
chr-1	43638186	43640169	2496	18910	.	Upstream	1545	HVAEP1_G001348
chr-1	43657007	43657867	2498	18068	.	Upstream	4465	HVAEP1_G001349
chr-1	43658473	43661408	2499	53775	.	Upstream	1962	HVAEP1_G001349
chr-1	43842438	43843150	2512	13820	.	Downstream	6143	HVAEP1_G001356
chr-1	43861383	43862692	2516	18074	.	Upstream	13732	HVAEP1_G001357
chr-1	43862906	43864685	2517	44343	.	Upstream	11974	HVAEP1_G001357
chr-1	43874309	43875024	2521	30200	.	Upstream	1103	HVAEP1_G001357
chr-1	43875648	43877760	2522	65160	.	OverlapStart	935	HVAEP1_G001357
chr-1	43880364	43881463	2524	23573	.	Downstream	5144	HVAEP1_G001357
chr-1	43893739	43895106	2529	62554	.	FeatureInsidePeak	350	HVAEP1_G001358
chr-1	43918628	43919763	2534	27777	.	Downstream	3254	HVAEP1_G001359
chr-1	43952403	43955040	2538	47412	.	Downstream	10676	HVAEP1_G001361
chr-1	43975157	43978287	2545	57956	.	PeakInsideFeature	6166	HVAEP1_G001362
chr-1	43999682	44001044	2548	49375	.	PeakInsideFeature	1161	HVAEP1_G001363
chr-1	44001231	44003884	2549	30407	.	OverlapStart	1033	HVAEP1_G001363
chr-1	44310757	44312267	2563	31575	.	PeakInsideFeature	8539	HVAEP1_G001372
chr-1	44329915	44330579	2574	58981	.	PeakInsideFeature	2024	HVAEP1_G001372
chr-1	44330933	44331313	2575	19023	.	PeakInsideFeature	1148	HVAEP1_G001372
chr-1	44332102	44334495	2576	44582	.	OverlapStart	1027	HVAEP1_G001372
chr-1	44334646	44336785	2577	144545	.	Upstream	3444	HVAEP1_G001372
chr-1	44347937	44348679	2580	19780	.	Upstream	4840	HVAEP1_G001373
chr-1	44352315	44353316	2583	17461	.	OverlapStart	333	HVAEP1_G001373
chr-1	44359628	44361545	2587	51150	.	PeakInsideFeature	5835	HVAEP1_G001372
chr-1	44368600	44369112	2590	44645	.	Upstream	2435	HVAEP1_G001372
chr-1	44369239	44370811	2591	53526	.	Upstream	3604	HVAEP1_G001372
chr-1	44371134	44372557	2592	33460	.	Upstream	5424	HVAEP1_G001372
chr-1	44377121	44378919	2595	48377	.	Upstream	6868	HVAEP1_G001374
chr-1	44387574	44389188	2598	29307	.	PeakInsideFeature	3493	HVAEP1_G001374
chr-1	44432406	44433180	2600	17928	.	Upstream	2637	HVAEP1_G001375
chr-1	44509999	44510912	2605	17184	.	Upstream	4583	HVAEP1_G001376
chr-1	44511751	44512534	2606	17179	.	Upstream	6270	HVAEP1_G001376
chr-1	44528508	44529811	2613	63532	.	Upstream	3268	HVAEP1_G001377
chr-1	44619111	44620405	2627	32421	.	Downstream	13410	HVAEP1_G001383
chr-1	44626417	44627877	2632	35657	.	PeakInsideFeature	6123	HVAEP1_G001382
chr-1	44631745	44632536	2635	17056	.	PeakInsideFeature	1130	HVAEP1_G001382
chr-1	44632967	44633735	2636	36001	.	OverlapStart	81	HVAEP1_G001382
chr-1	44633888	44634516	2637	40725	.	Upstream	523	HVAEP1_G001382
chr-1	44644507	44645615	2642	13999	.	Upstream	11382	HVAEP1_G001382
chr-1	44645991	44646826	2643	21380	.	Upstream	12729	HVAEP1_G001382
chr-1	44677359	44678030	2648	16100	.	Downstream	8628	HVAEP1_G001385
chr-1	44695866	44696689	2656	26133	.	Upstream	9955	HVAEP1_G001385
chr-1	44697257	44697864	2657	35672	.	Upstream	11238	HVAEP1_G001385
chr-1	44701345	44703852	2660	42890	.	Downstream	6692	HVAEP1_G001386
chr-1	44708886	44710508	2662	29910	.	OverlapStart	407	HVAEP1_G001386
chr-1	44790571	44791426	2670	22114	.	PeakInsideFeature	3913	HVAEP1_G001388
chr-1	44793730	44794606	2673	54105	.	PeakInsideFeature	743	HVAEP1_G001388
chr-1	44818272	44819902	2679	23496	.	OverlapEnd	22045	HVAEP1_G001389
chr-1	44833698	44835492	2682	75252	.	Downstream	18949	HVAEP1_G001390
chr-1	44874815	44875517	2686	19516	.	Upstream	17810	HVAEP1_G001391
chr-1	44952834	44954806	2697	31532	.	Downstream	9880	HVAEP1_G001396
chr-1	44967644	44969273	2700	48506	.	OverlapStart	741	HVAEP1_G001397
chr-1	44970920	44972110	2702	25978	.	Upstream	1258	HVAEP1_G001398
chr-1	44972277	44974034	2703	32551	.	OverlapStart	382	HVAEP1_G001398
chr-1	44974643	44975302	2704	21140	.	Downstream	2199	HVAEP1_G001398
chr-1	45170883	45171994	2708	30477	.	OverlapEnd	6233	HVAEP1_G001403
chr-1	45186860	45188694	2713	32616	.	PeakInsideFeature	1010	HVAEP1_G001403
chr-1	45214295	45214728	2720	16722	.	OverlapStart	109	HVAEP1_G001405
chr-1	45252491	45256092	2722	67627	.	OverlapStart	571	HVAEP1_G001406
chr-1	45442285	45443042	2726	30310	.	OverlapEnd	1766	HVAEP1_G001410
chr-1	45443288	45444477	2727	29350	.	OverlapStart	547	HVAEP1_G001410
chr-1	45537495	45539758	2737	39375	.	Downstream	21555	HVAEP1_G001413
chr-1	45861490	45862320	2753	25859	.	Upstream	3095	HVAEP1_G001423
chr-1	45865958	45867109	2755	21243	.	PeakInsideFeature	1533	HVAEP1_G001423
chr-1	45935702	45937283	2761	29564	.	PeakInsideFeature	1300	HVAEP1_G001425
chr-1	45974499	45975097	2765	31527	.	Upstream	4058	HVAEP1_G001426
chr-1	46082649	46083486	2776	23193	.	PeakInsideFeature	4108	HVAEP1_G001431
chr-1	46420740	46421233	2798	19030	.	Downstream	24407	HVAEP1_G001443
chr-1	46472689	46473418	2800	15412	.	Upstream	7648	HVAEP1_G001444
chr-1	46595229	46595717	2812	27795	.	Downstream	7981	HVAEP1_G001447
chr-1	46596993	46597803	2814	28648	.	Downstream	9906	HVAEP1_G001447
chr-1	46749593	46751569	2824	61776	.	Upstream	5352	HVAEP1_G001455
chr-1	46773887	46774279	2830	30718	.	Upstream	17183	HVAEP1_G001456
chr-1	46774775	46775496	2831	101460	.	Upstream	16131	HVAEP1_G001456
chr-1	47110721	47111533	2844	32429	.	PeakInsideFeature	1277	HVAEP1_G001464
chr-1	47251429	47251738	2848	24435	.	Upstream	15617	HVAEP1_G001466
chr-1	47251993	47255258	2849	121295	.	Upstream	17659	HVAEP1_G001466
chr-1	47312756	47314003	2855	20574	.	Upstream	27503	HVAEP1_G001467
chr-1	47373459	47374669	2865	30553	.	OverlapStart	357	HVAEP1_G001468
chr-1	47390250	47391141	2869	23876	.	PeakInsideFeature	4187	HVAEP1_G001469
chr-1	47392004	47392867	2871	16135	.	PeakInsideFeature	5927	HVAEP1_G001469
chr-1	47424286	47426234	2879	51352	.	Upstream	4445	HVAEP1_G001470
chr-1	47658115	47659901	2885	36528	.	Upstream	9833	HVAEP1_G001474
chr-1	47664352	47664802	2887	16760	.	Upstream	4264	HVAEP1_G001474
chr-1	48133297	48134249	2894	35191	.	Upstream	7854	HVAEP1_G001486
chr-1	48138787	48140471	2895	29776	.	Upstream	1998	HVAEP1_G001486
chr-1	48142238	48144449	2896	41466	.	PeakInsideFeature	1716	HVAEP1_G001486
chr-1	48270361	48271654	2899	18076	.	OverlapStart	384	HVAEP1_G001488
chr-1	48373059	48373794	2902	16678	.	Downstream	49562	HVAEP1_G001489
chr-1	48425267	48426103	2905	19192	.	Upstream	2697	HVAEP1_G001489
chr-1	48454591	48455809	2907	18251	.	Downstream	28667	HVAEP1_G001490
chr-1	48457246	48458993	2909	55780	.	Downstream	25748	HVAEP1_G001490
chr-1	48523667	48527130	2916	132361	.	Upstream	2962	HVAEP1_G001491
chr-1	48716046	48716927	2921	29974	.	Upstream	2800	HVAEP1_G001500
chr-1	48790570	48791076	2936	22779	.	Upstream	361	HVAEP1_G001503
chr-1	48899984	48900262	2946	30689	.	Upstream	4566	HVAEP1_G001505
chr-1	49134313	49138314	2963	67459	.	PeakInsideFeature	4726	HVAEP1_G001514
chr-1	49148076	49148660	2965	20856	.	Upstream	3987	HVAEP1_G001515
chr-1	49207457	49209506	2966	57445	.	FeatureInsidePeak	278	HVAEP1_G001516
chr-1	49221038	49222691	2970	189488	.	Downstream	3322	HVAEP1_G001517
chr-1	49223103	49223681	2971	43033	.	Downstream	4850	HVAEP1_G001517
chr-1	49241060	49241371	2974	22260	.	Upstream	2344	HVAEP1_G001518
chr-1	49401649	49404140	2983	26728	.	FeatureInsidePeak	620	HVAEP1_G001521
chr-1	49450014	49450435	2986	15406	.	PeakInsideFeature	605	HVAEP1_G001522
chr-1	49458746	49460646	2990	34923	.	Upstream	8867	HVAEP1_G001522
chr-1	49460807	49461539	2991	23892	.	Upstream	10344	HVAEP1_G001522
chr-1	49697060	49698403	3001	44984	.	PeakInsideFeature	11999	HVAEP1_G001531
chr-1	49700843	49702191	3004	32378	.	PeakInsideFeature	8213	HVAEP1_G001531
chr-1	49707267	49709005	3006	19171	.	PeakInsideFeature	1594	HVAEP1_G001531
chr-1	49732409	49734466	3011	40732	.	Upstream	1266	HVAEP1_G001532
chr-1	49917877	49920436	3030	53672	.	Downstream	27870	HVAEP1_G001541
chr-1	49921792	49922783	3032	24272	.	Downstream	24739	HVAEP1_G001541
chr-1	50057485	50058710	3043	23988	.	PeakInsideFeature	2305	HVAEP1_G001545
chr-1	50116023	50116617	3048	36102	.	Downstream	18613	HVAEP1_G001546
chr-1	50131255	50132221	3051	24594	.	PeakInsideFeature	3195	HVAEP1_G001546
chr-1	50397513	50400016	3071	29031	.	Upstream	1490	HVAEP1_G001559
chr-1	50541348	50543504	3083	125860	.	Upstream	2223	HVAEP1_G001561
chr-1	50549012	50550075	3084	26997	.	OverlapEnd	784	HVAEP1_G001562
chr-1	50697407	50698797	3090	35613	.	Downstream	17724	HVAEP1_G001564
chr-1	50699168	50699818	3091	45662	.	Downstream	19115	HVAEP1_G001564
chr-1	50756563	50758418	3095	66117	.	Upstream	23991	HVAEP1_G001565
chr-1	50793866	50796083	3096	40602	.	OverlapStart	8	HVAEP1_G001566
chr-1	50813836	50814201	3099	20151	.	Downstream	13277	HVAEP1_G001566
chr-1	50814305	50815038	3100	15809	.	Downstream	13930	HVAEP1_G001566
chr-1	50901544	50902490	3102	25937	.	PeakInsideFeature	3293	HVAEP1_G001568
chr-1	50923642	50924919	3103	31013	.	Upstream	9628	HVAEP1_G001569
chr-1	51078032	51078692	3111	27556	.	Upstream	1332	HVAEP1_G001573
chr-1	51206942	51207808	3120	37467	.	Downstream	2655	HVAEP1_G001578
chr-1	51327892	51329723	3131	52859	.	PeakInsideFeature	1840	HVAEP1_G001582
chr-1	51333605	51334489	3136	16665	.	Upstream	3400	HVAEP1_G001582
chr-1	51358906	51359355	3138	21020	.	Downstream	5124	HVAEP1_G001584
chr-1	51506233	51507438	3149	38934	.	OverlapStart	319	HVAEP1_G001597
chr-1	51839379	51839880	3165	35287	.	Upstream	1800	HVAEP1_G001603
chr-1	51840061	51840397	3166	31758	.	Upstream	2400	HVAEP1_G001603
chr-1	51843193	51843841	3168	25120	.	Upstream	4361	HVAEP1_G001604
chr-1	51859652	51860337	3172	33005	.	PeakInsideFeature	1315	HVAEP1_G001605
chr-1	51876762	51878011	3174	36023	.	Upstream	15526	HVAEP1_G001606
chr-1	51926028	51926995	3177	22117	.	Upstream	25758	HVAEP1_G001607
chr-1	51956202	51956781	3183	27177	.	PeakInsideFeature	4222	HVAEP1_G001607
chr-1	52086760	52087770	3187	23291	.	OverlapStart	241	HVAEP1_G001608
chr-1	52210860	52212192	3195	54056	.	Downstream	12831	HVAEP1_G001613
chr-1	52256641	52258362	3201	16127	.	Upstream	21913	HVAEP1_G001615
chr-1	52727123	52728252	3222	20824	.	Upstream	9291	HVAEP1_G001628
chr-1	52744558	52746532	3230	33899	.	FeatureInsidePeak	55	HVAEP1_G001631
chr-1	52808854	52810577	3234	21340	.	Upstream	11436	HVAEP1_G001633
chr-1	52990714	52995165	3244	141930	.	Upstream	3699	HVAEP1_G001637
chr-1	53000156	53001367	3248	50519	.	PeakInsideFeature	3142	HVAEP1_G001637
chr-1	53058622	53059130	3261	19343	.	OverlapStart	116	HVAEP1_G001639
chr-1	53084819	53085591	3263	16921	.	PeakInsideFeature	1401	HVAEP1_G001640
chr-1	53118773	53119385	3266	32199	.	Downstream	35275	HVAEP1_G001640
chr-1	53366300	53367030	3279	27427	.	Upstream	11109	HVAEP1_G001649
chr-1	53367206	53368773	3280	35443	.	Upstream	12433	HVAEP1_G001649
chr-1	53379991	53381419	3281	41687	.	Upstream	3859	HVAEP1_G001650
chr-1	53381538	53382743	3282	24041	.	Upstream	2424	HVAEP1_G001650
chr-1	53383884	53384704	3284	21517	.	OverlapStart	270	HVAEP1_G001650
chr-1	53712057	53714099	3299	44455	.	FeatureInsidePeak	792	HVAEP1_G001672
chr-1	53759995	53760950	3313	22610	.	OverlapStart	375	HVAEP1_G001674
chr-1	53949071	53950674	3319	283712	.	FeatureInsidePeak	208	HVAEP1_G001684
chr-1	53972519	53973245	3321	64427	.	Downstream	1460	HVAEP1_G001694
chr-1	54365759	54368481	3342	54722	.	Upstream	6044	HVAEP1_G001699
chr-1	54567122	54568933	3358	29147	.	PeakInsideFeature	1199	HVAEP1_G001705
chr-1	54637460	54638706	3372	63168	.	Upstream	5168	HVAEP1_G001707
chr-1	54700956	54704821	3375	99417	.	Upstream	4887	HVAEP1_G001708
chr-1	54704947	54708153	3376	70304	.	Upstream	5058	HVAEP1_G001710
chr-1	54845619	54846544	3383	21248	.	Upstream	4729	HVAEP1_G001713
chr-1	54951918	54953401	3387	44984	.	Upstream	7411	HVAEP1_G001718
chr-1	55046326	55046785	3400	26077	.	Upstream	7470	HVAEP1_G001722
chr-1	55050855	55053628	3403	87082	.	Upstream	1784	HVAEP1_G001722
chr-1	55425716	55426423	3418	16090	.	Upstream	2084	HVAEP1_G001730
chr-1	55669470	55670171	3436	20913	.	PeakInsideFeature	6358	HVAEP1_G001737
chr-1	55673756	55674727	3439	23646	.	PeakInsideFeature	1937	HVAEP1_G001737
chr-1	55676512	55678115	3441	63896	.	Upstream	1135	HVAEP1_G001737
chr-1	55708077	55708843	3447	32244	.	Downstream	6796	HVAEP1_G001739
chr-1	55709006	55709579	3448	17624	.	Downstream	7628	HVAEP1_G001739
chr-1	55794378	55796271	3461	50715	.	Upstream	16273	HVAEP1_G001743
chr-1	55816009	55818162	3468	43131	.	Upstream	38034	HVAEP1_G001743
chr-1	55964565	55966552	3485	45812	.	NA	NA	NA
chr-1	56011512	56012589	3488	96907	.	NA	NA	NA
chr-1	56047951	56048416	3489	68503	.	Downstream	68661	HVAEP1_G001744
chr-1	56137714	56138252	3498	22013	.	Upstream	10348	HVAEP1_G001745
chr-1	56327091	56329278	3504	45977	.	OverlapStart	871	HVAEP1_G001751
chr-1	56331766	56333149	3507	21435	.	Upstream	5144	HVAEP1_G001751
chr-1	56537213	56538249	3510	71430	.	OverlapEnd	603	HVAEP1_G001761
chr-1	56539495	56541056	3511	115219	.	FeatureInsidePeak	276	HVAEP1_G001763
chr-1	56556131	56556826	3514	45589	.	OverlapStart	189	HVAEP1_G001771
chr-1	56576343	56576979	3515	73112	.	Upstream	727	HVAEP1_G001778
chr-1	56736440	56738108	3520	16967	.	Upstream	2589	HVAEP1_G001786
chr-1	56758308	56761424	3521	92029	.	Downstream	14174	HVAEP1_G001787
chr-1	56888111	56890573	3528	66348	.	OverlapStart	575	HVAEP1_G001793
chr-1	56890707	56893076	3529	86081	.	PeakInsideFeature	1974	HVAEP1_G001793
chr-1	56918320	56918636	3535	26135	.	PeakInsideFeature	28561	HVAEP1_G001793
chr-1	57134681	57135253	3542	26403	.	Upstream	1915	HVAEP1_G001798
chr-1	57137418	57138651	3544	34072	.	PeakInsideFeature	2133	HVAEP1_G001799
chr-1	57139168	57139678	3545	18078	.	PeakInsideFeature	744	HVAEP1_G001799
chr-1	57339776	57341158	3549	39122	.	Upstream	36878	HVAEP1_G001803
chr-1	57346353	57346818	3552	29910	.	Upstream	30760	HVAEP1_G001803
chr-1	57365902	57368289	3553	64217	.	Upstream	10250	HVAEP1_G001803
chr-1	57370555	57372198	3556	63303	.	Upstream	5969	HVAEP1_G001803
chr-1	57373646	57375624	3559	37213	.	Upstream	2710	HVAEP1_G001803
chr-1	57376390	57377973	3560	34547	.	OverlapStart	164	HVAEP1_G001803
chr-1	57378058	57379593	3561	27838	.	OverlapEnd	1480	HVAEP1_G001803
chr-1	57488199	57489440	3577	49158	.	Upstream	4646	HVAEP1_G001808
chr-1	57489563	57490353	3578	26674	.	Upstream	3507	HVAEP1_G001808
chr-1	57522968	57524816	3583	19623	.	Upstream	14566	HVAEP1_G001809
chr-1	57813690	57815105	3601	65037	.	Downstream	21861	HVAEP1_G001819
chr-1	57838353	57839383	3606	40886	.	Upstream	2610	HVAEP1_G001819
chr-1	57977421	57978969	3612	21346	.	Downstream	4481	HVAEP1_G001824
chr-1	57989925	57991287	3614	23379	.	Upstream	7930	HVAEP1_G001824
chr-1	58065409	58066462	3628	51995	.	Upstream	9186	HVAEP1_G001827
chr-1	58198002	58198400	3633	24943	.	Downstream	8298	HVAEP1_G001833
chr-1	58215053	58216460	3638	25880	.	Downstream	3395	HVAEP1_G001836
chr-1	58217522	58219065	3640	51424	.	Downstream	5932	HVAEP1_G001836
chr-1	58220201	58220707	3641	22976	.	Downstream	8093	HVAEP1_G001836
chr-1	58288374	58289127	3645	39937	.	Upstream	20059	HVAEP1_G001837
chr-1	58289243	58290340	3646	41461	.	Upstream	21100	HVAEP1_G001837
chr-1	58603958	58605152	3663	38398	.	Downstream	14342	HVAEP1_G001855
chr-1	58703411	58705488	3665	72071	.	Upstream	2346	HVAEP1_G001856
chr-1	58724460	58725656	3669	19243	.	PeakInsideFeature	6533	HVAEP1_G001858
chr-1	58866024	58867164	3674	84787	.	FeatureInsidePeak	68	HVAEP1_G001866
chr-1	58867305	58867857	3675	32589	.	OverlapEnd	445	HVAEP1_G001867
chr-1	58868365	58868887	3676	26784	.	Upstream	409	HVAEP1_G001868
chr-1	58873655	58874749	3678	159708	.	Downstream	1909	HVAEP1_G001869
chr-1	58922209	58923928	3682	54314	.	Upstream	8221	HVAEP1_G001872
chr-1	59340777	59341529	3707	38264	.	Upstream	6106	HVAEP1_G001883
chr-1	59341615	59342961	3708	35913	.	Upstream	7241	HVAEP1_G001883
chr-1	59345955	59347234	3710	36472	.	Downstream	3802	HVAEP1_G001884
chr-1	59358930	59360387	3716	22124	.	Upstream	9262	HVAEP1_G001884
chr-1	59587582	59590933	3725	51897	.	PeakInsideFeature	1792	HVAEP1_G001892
chr-1	59899255	59899930	3735	27620	.	OverlapStart	0	HVAEP1_G001901
chr-1	59950501	59952901	3739	60727	.	OverlapStart	936	HVAEP1_G001906
chr-1	60362447	60365032	3747	74831	.	Downstream	24419	HVAEP1_G001931
chr-1	60425061	60426141	3751	49371	.	Downstream	1234	HVAEP1_G001932
chr-1	60456978	60457261	3754	20239	.	OverlapEnd	565	HVAEP1_G001941
chr-1	60512519	60513042	3757	60926	.	Upstream	1085	HVAEP1_G001957
chr-1	60784059	60784472	3780	14899	.	Downstream	12293	HVAEP1_G001964
chr-1	60793891	60795381	3783	35663	.	PeakInsideFeature	1922	HVAEP1_G001964
chr-1	60795527	60796124	3784	62864	.	PeakInsideFeature	733	HVAEP1_G001964
chr-1	60797104	60798739	3785	43599	.	Upstream	1363	HVAEP1_G001964
chr-1	60814805	60815905	3791	24402	.	Upstream	2497	HVAEP1_G001966
chr-1	60876863	60879977	3796	57840	.	FeatureInsidePeak	933	HVAEP1_G001968
chr-1	60887457	60888049	3799	15829	.	Downstream	3539	HVAEP1_G001969
chr-1	60891667	60892107	3802	24385	.	Upstream	595	HVAEP1_G001969
chr-1	60912947	60915254	3806	38792	.	Upstream	22808	HVAEP1_G001969
chr-1	60915633	60917321	3807	59196	.	Upstream	25185	HVAEP1_G001969
chr-1	60964326	60965941	3812	21557	.	OverlapStart	488	HVAEP1_G001970
chr-1	60971081	60971764	3814	22737	.	Upstream	6777	HVAEP1_G001970
chr-1	60972053	60972890	3815	21126	.	Upstream	7826	HVAEP1_G001970
chr-1	60989912	60991061	3818	23181	.	PeakInsideFeature	2169	HVAEP1_G001971
chr-1	61004850	61005417	3823	16420	.	Upstream	3289	HVAEP1_G001972
chr-1	61005524	61005835	3824	17978	.	Upstream	2743	HVAEP1_G001972
chr-1	61092356	61093254	3836	26417	.	Downstream	23394	HVAEP1_G001975
chr-1	61114648	61115606	3841	20527	.	Downstream	9962	HVAEP1_G001976
chr-1	61128514	61130803	3843	22478	.	FeatureInsidePeak	1076	HVAEP1_G001977
chr-1	61185503	61187643	3852	29841	.	Downstream	18385	HVAEP1_G001979
chr-1	61289054	61293969	3862	61380	.	FeatureInsidePeak	1056	HVAEP1_G001983
chr-1	61390572	61391405	3874	18292	.	Downstream	3662	HVAEP1_G001985
chr-1	61504542	61505606	3882	24492	.	OverlapEnd	667	HVAEP1_G001988
chr-1	61776638	61778293	3894	45083	.	Downstream	56116	HVAEP1_G001996
chr-1	61904096	61906120	3904	43250	.	Upstream	3058	HVAEP1_G001998
chr-1	61908462	61910166	3907	43050	.	OverlapStart	251	HVAEP1_G001998
chr-1	62052111	62053745	3919	55879	.	Upstream	18102	HVAEP1_G002003
chr-1	62186059	62187326	3923	24095	.	Downstream	72228	HVAEP1_G002004
chr-1	62188257	62190115	3924	26677	.	Downstream	69734	HVAEP1_G002004
chr-1	62199266	62200113	3927	16625	.	Downstream	59231	HVAEP1_G002004
chr-1	62274606	62276928	3938	76947	.	Upstream	4460	HVAEP1_G002005
chr-1	62277292	62277975	3939	24698	.	Upstream	2594	HVAEP1_G002005
chr-1	62278744	62280344	3941	189926	.	OverlapStart	683	HVAEP1_G002005
chr-1	62308583	62309056	3944	20062	.	Downstream	28592	HVAEP1_G002005
chr-1	62426333	62427006	3955	61547	.	Upstream	4911	HVAEP1_G002007
chr-1	62469162	62470140	3958	15890	.	Downstream	38071	HVAEP1_G002007
chr-1	62739921	62740312	3977	15842	.	PeakInsideFeature	3535	HVAEP1_G002014
chr-1	62742140	62746388	3979	65303	.	Upstream	2945	HVAEP1_G002014
chr-1	62763356	62764028	3988	35338	.	OverlapStart	189	HVAEP1_G002015
chr-1	62836488	62836912	3995	29284	.	PeakInsideFeature	9624	HVAEP1_G002017
chr-1	62846132	62847795	4000	58677	.	OverlapStart	639	HVAEP1_G002017
chr-1	62848015	62850275	4001	51010	.	Upstream	2821	HVAEP1_G002017
chr-1	62852989	62855928	4002	50628	.	Upstream	8134	HVAEP1_G002017
chr-1	62856294	62857190	4003	16451	.	Upstream	10418	HVAEP1_G002017
chr-1	62857302	62859996	4004	153369	.	Upstream	12325	HVAEP1_G002017
chr-1	62889343	62891116	4008	38947	.	Upstream	6712	HVAEP1_G002018
chr-1	62896373	62897862	4010	47521	.	Upstream	13600	HVAEP1_G002018
chr-1	62905777	62906276	4013	16892	.	Upstream	22509	HVAEP1_G002018
chr-1	62916990	62917367	4021	19192	.	Upstream	33661	HVAEP1_G002018
chr-1	62918053	62919597	4022	20094	.	Upstream	35308	HVAEP1_G002018
chr-1	63064225	63068613	4030	67451	.	Upstream	9859	HVAEP1_G002021
chr-1	63082269	63082640	4032	20065	.	Upstream	25894	HVAEP1_G002021
chr-1	63082981	63084701	4033	39828	.	Upstream	27281	HVAEP1_G002021
chr-1	63101907	63103092	4035	23986	.	Upstream	18733	HVAEP1_G002022
chr-1	63103215	63105543	4036	60626	.	Upstream	16853	HVAEP1_G002022
chr-1	63125276	63127471	4042	34511	.	PeakInsideFeature	2637	HVAEP1_G002022
chr-1	63128483	63128945	4043	41058	.	Upstream	760	HVAEP1_G002022
chr-1	63147456	63148483	4045	21208	.	Downstream	17804	HVAEP1_G002022
chr-1	63176146	63177169	4048	32545	.	Downstream	46492	HVAEP1_G002022
chr-1	63207346	63208756	4050	44544	.	PeakInsideFeature	17280	HVAEP1_G002023
chr-1	63230911	63232475	4054	29218	.	OverlapStart	688	HVAEP1_G002024
chr-1	63232840	63234013	4055	30321	.	Upstream	1045	HVAEP1_G002024
chr-1	63248164	63248733	4057	16629	.	PeakInsideFeature	13473	HVAEP1_G002025
chr-1	63300546	63301169	4060	21860	.	Upstream	510	HVAEP1_G002026
chr-1	63332908	63334183	4063	23315	.	Downstream	26018	HVAEP1_G002027
chr-1	63429183	63430032	4069	21995	.	Upstream	5412	HVAEP1_G002028
chr-1	63534736	63535217	4076	21134	.	PeakInsideFeature	355	HVAEP1_G002032
chr-1	63535998	63536798	4077	30736	.	Upstream	1067	HVAEP1_G002032
chr-1	63692067	63693290	4085	35706	.	PeakInsideFeature	17682	HVAEP1_G002041
chr-1	63693921	63695172	4086	47545	.	PeakInsideFeature	15814	HVAEP1_G002041
chr-1	63699525	63702237	4088	186363	.	PeakInsideFeature	9479	HVAEP1_G002041
chr-1	63704030	63706360	4091	100272	.	PeakInsideFeature	5165	HVAEP1_G002041
chr-1	63707183	63707896	4092	21438	.	PeakInsideFeature	2821	HVAEP1_G002041
chr-1	63709720	63710185	4093	17960	.	PeakInsideFeature	408	HVAEP1_G002041
chr-1	63804491	63805367	4103	55031	.	FeatureInsidePeak	236	HVAEP1_G002044
chr-1	63835930	63837333	4107	34303	.	Downstream	31938	HVAEP1_G002044
chr-1	63870758	63871089	4110	18446	.	Downstream	21289	HVAEP1_G002045
chr-1	64041441	64042417	4130	26396	.	Downstream	16303	HVAEP1_G002051
chr-1	64042540	64045065	4131	67290	.	Downstream	18176	HVAEP1_G002051
chr-1	64081860	64082410	4136	18466	.	PeakInsideFeature	5986	HVAEP1_G002052
chr-1	64082671	64084763	4137	45597	.	PeakInsideFeature	4404	HVAEP1_G002052
chr-1	64090572	64092788	4142	56504	.	Upstream	3559	HVAEP1_G002052
chr-1	64114162	64115435	4145	27130	.	Upstream	9198	HVAEP1_G002053
chr-1	64173381	64174029	4152	15248	.	Upstream	2236	HVAEP1_G002055
chr-1	64212506	64213937	4155	31665	.	Upstream	25029	HVAEP1_G002056
chr-1	64240361	64241539	4160	36359	.	Downstream	2700	HVAEP1_G002056
chr-1	64278445	64279400	4167	25422	.	Upstream	17594	HVAEP1_G002058
chr-1	64291164	64293982	4170	95577	.	Upstream	3943	HVAEP1_G002058
chr-1	64295656	64296325	4171	19443	.	Upstream	526	HVAEP1_G002058
chr-1	64296417	64298128	4172	49964	.	OverlapStart	756	HVAEP1_G002058
chr-1	64299074	64300654	4173	59697	.	PeakInsideFeature	3348	HVAEP1_G002058
chr-1	64356649	64359899	4181	62316	.	Upstream	6573	HVAEP1_G002060
chr-1	64372067	64373886	4185	27779	.	Upstream	4146	HVAEP1_G002061
chr-1	64439004	64440711	4199	56120	.	OverlapStart	277	HVAEP1_G002066
chr-1	64441016	64442122	4200	21119	.	PeakInsideFeature	1989	HVAEP1_G002066
chr-1	64489186	64492799	4209	52886	.	PeakInsideFeature	2256	HVAEP1_G002070
chr-1	64525190	64528778	4214	97014	.	Upstream	11682	HVAEP1_G002071
chr-1	64533430	64535552	4216	41851	.	Upstream	4175	HVAEP1_G002071
chr-1	64537188	64537532	4218	27276	.	Upstream	1306	HVAEP1_G002071
chr-1	64847662	64848520	4242	62168	.	Upstream	10413	HVAEP1_G002078
chr-1	64851948	64852696	4244	23241	.	Downstream	13407	HVAEP1_G002079
chr-1	64852872	64855424	4245	49386	.	Downstream	11581	HVAEP1_G002079
chr-1	64863792	64864539	4247	19168	.	PeakInsideFeature	1564	HVAEP1_G002079
chr-1	64868477	64869789	4248	26327	.	OverlapEnd	795	HVAEP1_G002080
chr-1	64888989	64890830	4250	41363	.	Upstream	10078	HVAEP1_G002081
chr-1	64988616	64989094	4259	15927	.	Upstream	15080	HVAEP1_G002084
chr-1	65763655	65764038	4300	28241	.	Upstream	684	HVAEP1_G002103
chr-1	65857107	65859008	4307	66167	.	OverlapStart	925	HVAEP1_G002109
chr-1	65926268	65926751	4319	21597	.	Downstream	1565	HVAEP1_G002112
chr-1	65961428	65962813	4323	39742	.	Upstream	5967	HVAEP1_G002114
chr-1	65968569	65970277	4328	44412	.	PeakInsideFeature	1336	HVAEP1_G002114
chr-1	65970897	65972453	4329	82216	.	Downstream	3588	HVAEP1_G002114
chr-1	65973280	65973889	4330	27595	.	Downstream	5497	HVAEP1_G002114
chr-1	66002227	66002711	4336	16143	.	Upstream	19488	HVAEP1_G002115
chr-1	66018203	66019771	4339	21793	.	Upstream	2970	HVAEP1_G002115
chr-1	66021755	66022430	4341	21075	.	OverlapStart	135	HVAEP1_G002115
chr-1	66043398	66044534	4346	23328	.	Downstream	7160	HVAEP1_G002116
chr-1	66072112	66074070	4352	33209	.	OverlapStart	90	HVAEP1_G002119
chr-1	66074496	66074773	4353	17909	.	PeakInsideFeature	1633	HVAEP1_G002119
chr-1	66074867	66075509	4354	25182	.	PeakInsideFeature	2187	HVAEP1_G002119
chr-1	66134419	66137055	4360	58627	.	Upstream	5256	HVAEP1_G002122
chr-1	66137929	66138786	4362	66837	.	Upstream	2636	HVAEP1_G002122
chr-1	66154618	66155228	4365	16401	.	Downstream	5154	HVAEP1_G002123
chr-1	66160752	66161740	4366	29200	.	PeakInsideFeature	707	HVAEP1_G002124
chr-1	66213054	66215050	4374	29811	.	Upstream	14195	HVAEP1_G002125
chr-1	66319058	66320358	4379	31312	.	Downstream	2659	HVAEP1_G002127
chr-1	66321103	66324706	4380	177686	.	FeatureInsidePeak	537	HVAEP1_G002127
chr-1	66324990	66326341	4381	29032	.	Upstream	3298	HVAEP1_G002127
chr-1	66335599	66337407	4386	60616	.	Upstream	14136	HVAEP1_G002127
chr-1	66345200	66346779	4392	27630	.	Upstream	23622	HVAEP1_G002127
chr-1	66371417	66372311	4398	28563	.	Downstream	2916	HVAEP1_G002128
chr-1	66372521	66374212	4399	42645	.	OverlapEnd	1414	HVAEP1_G002128
chr-1	66385476	66387394	4402	80034	.	Upstream	11295	HVAEP1_G002129
chr-1	66389602	66390430	4405	51649	.	Upstream	14876	HVAEP1_G002129
chr-1	66402477	66403838	4407	24400	.	Downstream	11305	HVAEP1_G002130
chr-1	66404407	66405499	4409	17065	.	Downstream	9509	HVAEP1_G002130
chr-1	66522714	66523270	4422	21523	.	Upstream	1194	HVAEP1_G002133
chr-1	66619612	66622219	4431	71345	.	Upstream	4944	HVAEP1_G002138
chr-1	66622322	66623447	4432	29339	.	Upstream	6913	HVAEP1_G002138
chr-1	66647912	66650188	4438	55790	.	Upstream	6339	HVAEP1_G002139
chr-1	66864341	66864826	4453	20123	.	Upstream	3475	HVAEP1_G002144
chr-1	66913930	66914612	4455	17067	.	Upstream	10398	HVAEP1_G002147
chr-1	66994501	66995474	4463	24862	.	PeakInsideFeature	5364	HVAEP1_G002149
chr-1	66995697	66996652	4464	18678	.	PeakInsideFeature	6551	HVAEP1_G002149
chr-1	67132597	67133763	4471	33114	.	Upstream	9975	HVAEP1_G002154
chr-1	67356679	67359555	4487	72880	.	Upstream	19737	HVAEP1_G002165
chr-1	67374806	67376209	4488	39010	.	Upstream	2347	HVAEP1_G002165
chr-1	67376458	67377207	4489	40307	.	Upstream	1022	HVAEP1_G002165
chr-1	67379098	67380151	4491	21735	.	PeakInsideFeature	1770	HVAEP1_G002165
chr-1	67407709	67408144	4496	14646	.	Downstream	13052	HVAEP1_G002167
chr-1	67417627	67418467	4499	23900	.	Downstream	2931	HVAEP1_G002167
chr-1	67419961	67421107	4501	38802	.	FeatureInsidePeak	444	HVAEP1_G002167
chr-1	67816613	67817961	4513	29995	.	Upstream	48287	HVAEP1_G002176
chr-1	67918159	67919415	4522	22239	.	Upstream	26715	HVAEP1_G002177
chr-1	68005043	68005810	4525	15934	.	Upstream	13180	HVAEP1_G002180
chr-1	68066997	68068268	4529	39743	.	Downstream	5395	HVAEP1_G002182
chr-1	68114967	68115599	4531	31016	.	Downstream	53046	HVAEP1_G002182
chr-1	68222646	68223302	4541	21909	.	Downstream	22170	HVAEP1_G002183
chr-1	68241972	68242390	4542	29880	.	Downstream	2963	HVAEP1_G002183
chr-1	68243466	68243790	4543	69872	.	Downstream	1516	HVAEP1_G002183
chr-1	68244796	68246175	4544	65450	.	OverlapStart	193	HVAEP1_G002183
chr-1	68260673	68261339	4545	66246	.	Upstream	15328	HVAEP1_G002183
chr-1	68673257	68675632	4559	48487	.	Downstream	21557	HVAEP1_G002216
chr-1	68808337	68809504	4561	44056	.	Upstream	41544	HVAEP1_G002228
chr-1	69058191	69059177	4586	17942	.	Upstream	5373	HVAEP1_G002235
chr-1	69069813	69071759	4589	40602	.	FeatureInsidePeak	754	HVAEP1_G002240
chr-1	69423054	69423851	4604	25191	.	Upstream	29379	HVAEP1_G002252
chr-1	69485629	69487035	4612	27412	.	Upstream	1338	HVAEP1_G002250
chr-1	69504888	69506219	4619	26299	.	Upstream	20559	HVAEP1_G002250
chr-1	69506663	69507346	4620	17484	.	Upstream	22010	HVAEP1_G002250
chr-1	69932355	69934268	4630	61640	.	Downstream	31050	HVAEP1_G002259
chr-1	70020945	70022160	4632	18988	.	Upstream	47610	HVAEP1_G002264
chr-1	70164899	70165459	4641	35648	.	Downstream	21669	HVAEP1_G002266
chr-1	70299259	70300237	4652	19642	.	Upstream	1290	HVAEP1_G002270
chr-1	70362464	70364680	4657	44944	.	PeakInsideFeature	3322	HVAEP1_G002271
chr-1	70366015	70366890	4660	20840	.	PeakInsideFeature	442	HVAEP1_G002271
chr-1	70367226	70367666	4661	19767	.	Upstream	552	HVAEP1_G002271
chr-1	70380962	70381917	4668	23012	.	Downstream	7851	HVAEP1_G002272
chr-1	70433753	70434883	4673	26584	.	Upstream	2463	HVAEP1_G002275
chr-1	70438811	70439991	4675	28088	.	Upstream	7546	HVAEP1_G002275
chr-1	70499360	70499677	4681	33748	.	Upstream	656	HVAEP1_G002276
chr-1	70502323	70503093	4683	38527	.	Upstream	3846	HVAEP1_G002276
chr-1	70546190	70547529	4689	19619	.	PeakInsideFeature	9488	HVAEP1_G002277
chr-1	70574630	70575570	4692	19041	.	Upstream	586	HVAEP1_G002279
chr-1	70615098	70618223	4698	40162	.	PeakInsideFeature	27409	HVAEP1_G002280
chr-1	70683861	70684182	4700	29541	.	Upstream	8746	HVAEP1_G002281
chr-1	71042278	71043204	4709	20781	.	PeakInsideFeature	1589	HVAEP1_G002299
chr-1	71214613	71215143	4730	34591	.	PeakInsideFeature	335	HVAEP1_G002303
chr-1	71298469	71299108	4741	19333	.	Upstream	2414	HVAEP1_G002307
chr-1	71300618	71301550	4744	22655	.	OverlapStart	118	HVAEP1_G002307
chr-1	71301687	71304208	4745	69683	.	PeakInsideFeature	1745	HVAEP1_G002307
chr-1	71305511	71306855	4746	26449	.	Downstream	4981	HVAEP1_G002307
chr-1	71558881	71560863	4753	49113	.	PeakInsideFeature	5110	HVAEP1_G002313
chr-1	71664673	71665575	4758	19396	.	FeatureInsidePeak	47	HVAEP1_G002315
chr-1	71685660	71686595	4762	15160	.	Upstream	5629	HVAEP1_G002318
chr-1	71744771	71746321	4770	89534	.	PeakInsideFeature	27912	HVAEP1_G002321
chr-1	71873075	71874304	4778	54221	.	Upstream	4822	HVAEP1_G002322
chr-1	71910060	71910856	4781	15973	.	Upstream	3521	HVAEP1_G002323
chr-1	71913933	71915479	4786	45064	.	FeatureInsidePeak	727	HVAEP1_G002323
chr-1	72034758	72035035	4794	15392	.	Upstream	1532	HVAEP1_G002325
chr-1	72061522	72062943	4800	32138	.	Upstream	14242	HVAEP1_G002326
chr-1	72075043	72076562	4805	51083	.	OverlapStart	672	HVAEP1_G002326
chr-1	72077432	72077718	4806	18419	.	PeakInsideFeature	1101	HVAEP1_G002326
chr-1	72078350	72079847	4807	26151	.	PeakInsideFeature	2624	HVAEP1_G002326
chr-1	72117540	72119490	4815	243320	.	PeakInsideFeature	1148	HVAEP1_G002328
chr-1	72125106	72126768	4819	19971	.	Upstream	6274	HVAEP1_G002328
chr-1	72149902	72150957	4829	25135	.	Upstream	18383	HVAEP1_G002329
chr-1	72162809	72163926	4831	19631	.	Upstream	5445	HVAEP1_G002329
chr-1	72186527	72187137	4834	18356	.	Upstream	14040	HVAEP1_G002330
chr-1	72188529	72191051	4836	88662	.	Upstream	11082	HVAEP1_G002330
chr-1	72295521	72298230	4856	108958	.	Downstream	16868	HVAEP1_G002332
chr-1	72389901	72391626	4865	46023	.	Upstream	19563	HVAEP1_G002334
chr-1	72519235	72521390	4877	73827	.	Upstream	4925	HVAEP1_G002339
chr-1	72561507	72562587	4882	34622	.	Upstream	15594	HVAEP1_G002340
chr-1	72564729	72566186	4884	22502	.	Upstream	12184	HVAEP1_G002340
chr-1	72567347	72567889	4885	23729	.	Upstream	10023	HVAEP1_G002340
chr-1	72568056	72569568	4886	65471	.	Upstream	8829	HVAEP1_G002340
chr-1	72572103	72572536	4888	25148	.	Upstream	5322	HVAEP1_G002340
chr-1	72577556	72578278	4892	14909	.	OverlapStart	276	HVAEP1_G002340
chr-1	72645135	72645814	4896	46366	.	PeakInsideFeature	21222	HVAEP1_G002341
chr-1	72941745	72942295	4910	20459	.	PeakInsideFeature	484	HVAEP1_G002382
chr-1	72973316	72975311	4918	84421	.	Downstream	25213	HVAEP1_G002384
chr-1	73005330	73005831	4923	45870	.	Downstream	27094	HVAEP1_G002385
chr-1	73009593	73010539	4925	23234	.	Downstream	22608	HVAEP1_G002385
chr-1	73069227	73070281	4934	24884	.	Upstream	3921	HVAEP1_G002386
chr-1	73083115	73084430	4937	33457	.	Upstream	5927	HVAEP1_G002387
chr-1	73119907	73123049	4939	50100	.	PeakInsideFeature	4571	HVAEP1_G002389
chr-1	73157593	73159394	4942	99880	.	Downstream	18556	HVAEP1_G002390
chr-1	73165139	73165956	4945	31459	.	Downstream	25610	HVAEP1_G002390
chr-1	73170679	73171930	4948	64834	.	Upstream	22144	HVAEP1_G002391
chr-1	73237739	73238456	4950	19653	.	OverlapEnd	1871	HVAEP1_G002393
chr-1	73345070	73346449	4955	18132	.	OverlapEnd	1509	HVAEP1_G002398
chr-1	73347065	73348061	4956	23293	.	OverlapStart	295	HVAEP1_G002398
chr-1	73348373	73349273	4957	25553	.	Upstream	1555	HVAEP1_G002398
chr-1	73349587	73351431	4958	47501	.	Upstream	3241	HVAEP1_G002398
chr-1	73362388	73363196	4960	19102	.	Downstream	9937	HVAEP1_G002399
chr-1	73372639	73375347	4964	46285	.	OverlapStart	1264	HVAEP1_G002399
chr-1	73779258	73779696	4989	31655	.	Upstream	6138	HVAEP1_G002414
chr-1	73803532	73804469	4994	35549	.	Downstream	18385	HVAEP1_G002414
chr-1	73904765	73905823	5003	36366	.	Downstream	15127	HVAEP1_G002415
chr-1	73928551	73929611	5007	16964	.	Downstream	3225	HVAEP1_G002417
chr-1	73936394	73938512	5008	38049	.	Upstream	3708	HVAEP1_G002418
chr-1	73988486	73989291	5012	33982	.	Downstream	18876	HVAEP1_G002419
chr-1	73992282	73993001	5016	22323	.	Downstream	20622	HVAEP1_G002420
chr-1	74005235	74007392	5020	52843	.	Downstream	6950	HVAEP1_G002420
chr-1	74012576	74015374	5023	30780	.	OverlapStart	712	HVAEP1_G002420
chr-1	74050946	74051752	5026	16466	.	Downstream	13807	HVAEP1_G002423
chr-1	74073914	74074921	5027	30348	.	PeakInsideFeature	1668	HVAEP1_G002424
chr-1	74075535	74076225	5028	29569	.	OverlapStart	205	HVAEP1_G002424
chr-1	74109093	74111013	5034	43494	.	Upstream	3007	HVAEP1_G002427
chr-1	74117432	74117927	5038	37551	.	PeakInsideFeature	4619	HVAEP1_G002427
chr-1	74171451	74175023	5045	46416	.	Upstream	2524	HVAEP1_G002429
chr-1	74206780	74207572	5049	17559	.	PeakInsideFeature	426	HVAEP1_G002430
chr-1	74378956	74379859	5058	18463	.	Upstream	5149	HVAEP1_G002435
chr-1	74394831	74396447	5064	32242	.	PeakInsideFeature	11083	HVAEP1_G002435
chr-1	74432539	74434259	5065	34707	.	PeakInsideFeature	48843	HVAEP1_G002435
chr-1	74458811	74460892	5068	22812	.	Downstream	39808	HVAEP1_G002436
chr-1	74485388	74485964	5076	46575	.	Downstream	13983	HVAEP1_G002436
chr-1	74502194	74504654	5078	127609	.	Upstream	3765	HVAEP1_G002436
chr-1	74507461	74508263	5080	16990	.	Upstream	8203	HVAEP1_G002436
chr-1	74664251	74665588	5089	30413	.	OverlapEnd	21004	HVAEP1_G002442
chr-1	74676094	74676982	5090	25899	.	PeakInsideFeature	9385	HVAEP1_G002442
chr-1	74677682	74678493	5091	25248	.	PeakInsideFeature	7836	HVAEP1_G002442
chr-1	74706582	74707721	5096	28872	.	Upstream	1336	HVAEP1_G002445
chr-1	74795955	74797775	5115	29866	.	Downstream	3500	HVAEP1_G002447
chr-1	74801128	74803104	5118	51519	.	Upstream	5332	HVAEP1_G002448
chr-1	74893207	74893907	5129	32728	.	Upstream	629	HVAEP1_G002457
chr-1	75059385	75064133	5133	34354	.	Downstream	11461	HVAEP1_G002463
chr-1	75066027	75067662	5134	24310	.	Upstream	8702	HVAEP1_G002464
chr-1	75196554	75196829	5140	33926	.	PeakInsideFeature	24569	HVAEP1_G002469
chr-1	75577237	75578242	5149	16089	.	Upstream	23112	HVAEP1_G002479
chr-1	75715814	75717184	5170	34817	.	PeakInsideFeature	2625	HVAEP1_G002489
chr-1	75762611	75763931	5180	31622	.	Upstream	9540	HVAEP1_G002490
chr-1	75917800	75919084	5186	27296	.	Upstream	22622	HVAEP1_G002492
chr-1	75998044	75999015	5198	35687	.	Upstream	10746	HVAEP1_G002495
chr-1	76059636	76060199	5202	13764	.	PeakInsideFeature	29223	HVAEP1_G002496
chr-1	76060872	76062597	5203	38341	.	PeakInsideFeature	27406	HVAEP1_G002496
chr-1	76066860	76070287	5204	71617	.	PeakInsideFeature	20567	HVAEP1_G002496
chr-1	76096371	76099932	5208	48887	.	Upstream	9011	HVAEP1_G002496
chr-1	76106222	76107591	5209	15510	.	PeakInsideFeature	6362	HVAEP1_G002497
chr-1	76112819	76113221	5212	19687	.	PeakInsideFeature	248	HVAEP1_G002497
chr-1	76128015	76128435	5219	15258	.	Upstream	9317	HVAEP1_G002500
chr-1	76173568	76175513	5222	71960	.	Upstream	2053	HVAEP1_G002501
chr-1	76341296	76342209	5232	49530	.	Downstream	2224	HVAEP1_G002507
chr-1	76346741	76348057	5236	15632	.	Downstream	7871	HVAEP1_G002507
chr-1	76353971	76354510	5240	20657	.	Upstream	10361	HVAEP1_G002508
chr-1	76357387	76360274	5243	93223	.	Upstream	5771	HVAEP1_G002508
chr-1	76486645	76487389	5262	18234	.	Upstream	1385	HVAEP1_G002514
chr-1	76813752	76814896	5279	20475	.	OverlapStart	571	HVAEP1_G002527
chr-1	76816293	76817300	5280	83681	.	Upstream	1605	HVAEP1_G002527
chr-1	76830109	76830945	5281	18215	.	Upstream	10816	HVAEP1_G002528
chr-1	76874159	76875596	5289	18807	.	Upstream	14949	HVAEP1_G002529
chr-1	76963940	76964544	5304	14753	.	Upstream	8683	HVAEP1_G002530
chr-1	77079258	77080692	5312	19871	.	Upstream	21726	HVAEP1_G002533
chr-1	77090033	77090884	5313	17024	.	Upstream	11243	HVAEP1_G002533
chr-1	77203656	77204657	5323	32468	.	PeakInsideFeature	7139	HVAEP1_G002536
chr-1	77339465	77342306	5330	49161	.	Downstream	42025	HVAEP1_G002538
chr-1	77455980	77460745	5333	225304	.	OverlapStart	962	HVAEP1_G002539
chr-1	77610778	77611331	5345	41955	.	Upstream	12959	HVAEP1_G002545
chr-1	77619647	77620209	5346	15365	.	Upstream	21833	HVAEP1_G002545
chr-1	77622323	77623279	5347	17318	.	Upstream	19020	HVAEP1_G002546
chr-1	77966053	77966919	5358	18813	.	Downstream	2318	HVAEP1_G002555
chr-1	77983318	77985012	5361	31817	.	Upstream	15361	HVAEP1_G002555
chr-1	78154910	78157116	5368	70928	.	PeakInsideFeature	2558	HVAEP1_G002560
chr-1	78163317	78164653	5372	33410	.	Upstream	5414	HVAEP1_G002560
chr-1	78276930	78277306	5381	18564	.	Upstream	21095	HVAEP1_G002565
chr-1	78360504	78361122	5393	17960	.	Upstream	12012	HVAEP1_G002567
chr-1	78394348	78394770	5398	24421	.	Upstream	1809	HVAEP1_G002570
chr-1	78446395	78448067	5403	54720	.	Upstream	9140	HVAEP1_G002572
chr-1	78488880	78490186	5409	18226	.	Upstream	10236	HVAEP1_G002573
chr-1	78492767	78494607	5411	37115	.	Upstream	13575	HVAEP1_G002574
chr-1	78653503	78654510	5426	76587	.	Upstream	8325	HVAEP1_G002579
chr-1	78668718	78670341	5430	93425	.	OverlapStart	799	HVAEP1_G002580
chr-1	78697770	78699263	5434	25131	.	PeakInsideFeature	29786	HVAEP1_G002580
chr-1	78711119	78712238	5437	20107	.	Upstream	27376	HVAEP1_G002581
chr-1	78811365	78811728	5453	19663	.	Upstream	7823	HVAEP1_G002582
chr-1	78829925	78830557	5457	20841	.	Upstream	3755	HVAEP1_G002583
chr-1	78962445	78963378	5467	32288	.	Upstream	14532	HVAEP1_G002588
chr-1	78994433	78995623	5474	51942	.	Downstream	16524	HVAEP1_G002589
chr-1	79031287	79034440	5475	97967	.	Downstream	6934	HVAEP1_G002590
chr-1	79204653	79204997	5490	27856	.	Upstream	1555	HVAEP1_G002598
chr-1	79205257	79206990	5491	43087	.	Upstream	2853	HVAEP1_G002598
chr-1	79251016	79251466	5502	15520	.	Upstream	19180	HVAEP1_G002600
chr-1	79251733	79252341	5503	23278	.	Upstream	18384	HVAEP1_G002600
chr-1	79271637	79272962	5509	29396	.	PeakInsideFeature	959	HVAEP1_G002600
chr-1	79410038	79411698	5517	52842	.	Upstream	26703	HVAEP1_G002603
chr-1	79421422	79422377	5518	17655	.	Upstream	15672	HVAEP1_G002603
chr-1	79497106	79497604	5522	15753	.	Upstream	10111	HVAEP1_G002605
chr-1	79600581	79601946	5529	27740	.	Downstream	46457	HVAEP1_G002608
chr-1	79602065	79604286	5530	29886	.	Downstream	44545	HVAEP1_G002608
chr-1	79633056	79634487	5535	30709	.	PeakInsideFeature	13949	HVAEP1_G002608
chr-1	79709173	79710190	5539	23913	.	OverlapStart	206	HVAEP1_G002610
chr-1	79740365	79742518	5542	22970	.	PeakInsideFeature	8687	HVAEP1_G002612
chr-1	79769180	79769931	5543	18824	.	Downstream	8967	HVAEP1_G002613
chr-1	79770626	79771888	5544	23543	.	Downstream	10669	HVAEP1_G002613
chr-1	80167078	80168246	5557	20726	.	Upstream	19511	HVAEP1_G002632
chr-1	80489677	80491121	5569	74115	.	PeakInsideFeature	6673	HVAEP1_G002648
chr-1	80509151	80510844	5577	84270	.	PeakInsideFeature	4448	HVAEP1_G002649
chr-1	80723508	80724769	5592	27573	.	Downstream	14109	HVAEP1_G002651
chr-1	80981003	80982959	5601	43574	.	Downstream	6229	HVAEP1_G002663
chr-10	15	1066	5605	86604	.	NA	NA	NA
chr-10	1246	2276	5606	367816	.	NA	NA	NA
chr-10	4336	5071	5608	56956	.	NA	NA	NA
chr-10	5319	5963	5609	60780	.	NA	NA	NA
chr-10	16048	16847	5612	22702	.	NA	NA	NA
chr-10	161854	162774	5616	21542	.	Upstream	7780	HVAEP1_G017677
chr-10	186141	187022	5621	17749	.	PeakInsideFeature	2711	HVAEP1_G017678
chr-10	191309	192098	5625	13987	.	PeakInsideFeature	7833	HVAEP1_G017678
chr-10	201181	202928	5629	45932	.	PeakInsideFeature	18184	HVAEP1_G017678
chr-10	346729	347860	5641	22424	.	Upstream	6300	HVAEP1_G017679
chr-10	399619	401199	5646	18545	.	Upstream	26999	HVAEP1_G017682
chr-10	414689	415619	5648	28925	.	Upstream	12254	HVAEP1_G017682
chr-10	490974	492209	5653	25120	.	PeakInsideFeature	3644	HVAEP1_G017685
chr-10	495247	495691	5656	25688	.	PeakInsideFeature	7522	HVAEP1_G017685
chr-10	778550	779180	5662	10549	.	Downstream	44535	HVAEP1_G017688
chr-10	1548087	1549629	5680	29072	.	OverlapStart	309	HVAEP1_G017700
chr-10	1559673	1561122	5685	45510	.	PeakInsideFeature	11230	HVAEP1_G017700
chr-10	1616289	1616884	5690	23933	.	Downstream	6981	HVAEP1_G017701
chr-10	1618216	1619948	5691	32461	.	Downstream	9477	HVAEP1_G017701
chr-10	1645863	1648202	5696	49090	.	PeakInsideFeature	8875	HVAEP1_G017702
chr-10	1648503	1649252	5697	34110	.	PeakInsideFeature	10720	HVAEP1_G017702
chr-10	1775058	1775693	5702	19538	.	Downstream	4353	HVAEP1_G017704
chr-10	1827666	1829007	5712	19634	.	Upstream	33160	HVAEP1_G017705
chr-10	2047038	2047826	5732	14703	.	Upstream	7222	HVAEP1_G017708
chr-10	2105444	2105872	5740	37752	.	Upstream	11143	HVAEP1_G017710
chr-10	2150832	2152281	5747	25125	.	Downstream	33909	HVAEP1_G017711
chr-10	2182687	2183700	5751	29623	.	PeakInsideFeature	2272	HVAEP1_G017711
chr-10	2185762	2186251	5753	16238	.	Upstream	541	HVAEP1_G017711
chr-10	2204156	2205559	5755	31379	.	Upstream	19392	HVAEP1_G017711
chr-10	2328987	2330328	5760	18833	.	Upstream	8276	HVAEP1_G017717
chr-10	2764861	2765626	5786	29691	.	Upstream	5556	HVAEP1_G017727
chr-10	2768636	2771979	5787	111876	.	Upstream	10620	HVAEP1_G017727
chr-10	2863072	2863570	5796	25420	.	Upstream	16418	HVAEP1_G017728
chr-10	2867275	2868311	5798	53900	.	Upstream	20890	HVAEP1_G017728
chr-10	2871060	2871888	5801	37296	.	Upstream	24571	HVAEP1_G017728
chr-10	2928946	2930140	5812	17194	.	Upstream	15961	HVAEP1_G017730
chr-10	2930460	2932206	5813	51494	.	Upstream	17751	HVAEP1_G017730
chr-10	2952345	2953557	5816	15856	.	Upstream	39369	HVAEP1_G017730
chr-10	3010112	3011325	5820	25162	.	Upstream	19234	HVAEP1_G017732
chr-10	3058628	3059132	5824	44799	.	Upstream	10726	HVAEP1_G017733
chr-10	3342231	3342955	5842	20706	.	Downstream	7209	HVAEP1_G017741
chr-10	3350786	3352357	5849	32225	.	Upstream	1769	HVAEP1_G017741
chr-10	3356450	3357561	5852	17226	.	Upstream	7203	HVAEP1_G017741
chr-10	3403997	3405910	5854	43367	.	Upstream	6657	HVAEP1_G017742
chr-10	3535241	3535732	5858	15821	.	Upstream	35274	HVAEP1_G017748
chr-10	3546614	3547416	5860	27329	.	Upstream	23745	HVAEP1_G017748
chr-10	3596349	3597470	5865	17423	.	Upstream	3058	HVAEP1_G017752
chr-10	3815817	3816365	5875	29450	.	PeakInsideFeature	7678	HVAEP1_G017758
chr-10	3820422	3821380	5876	17504	.	PeakInsideFeature	2868	HVAEP1_G017758
chr-10	3837769	3838112	5877	16989	.	Upstream	14171	HVAEP1_G017758
chr-10	3850036	3851125	5880	24484	.	Upstream	7172	HVAEP1_G017759
chr-10	3852291	3853728	5882	51613	.	Upstream	4743	HVAEP1_G017759
chr-10	3856489	3857599	5884	49236	.	Upstream	708	HVAEP1_G017759
chr-10	3858288	3858875	5885	16686	.	PeakInsideFeature	829	HVAEP1_G017759
chr-10	3895880	3897148	5894	30525	.	OverlapStart	64	HVAEP1_G017760
chr-10	3901405	3903731	5897	87519	.	Upstream	6118	HVAEP1_G017760
chr-10	3904480	3905183	5899	15117	.	Upstream	8381	HVAEP1_G017760
chr-10	3941056	3943383	5902	66070	.	Downstream	7953	HVAEP1_G017761
chr-10	3967786	3969190	5908	60505	.	Upstream	3474	HVAEP1_G017762
chr-10	3970133	3970934	5909	63708	.	Upstream	1429	HVAEP1_G017762
chr-10	3975400	3977406	5912	41059	.	Downstream	4441	HVAEP1_G017762
chr-10	4035646	4036509	5922	22251	.	Upstream	1557	HVAEP1_G017765
chr-10	4153725	4154325	5928	19894	.	Upstream	2099	HVAEP1_G017767
chr-10	4291696	4292971	5935	18040	.	Upstream	3040	HVAEP1_G017768
chr-10	4307282	4310308	5940	97754	.	Upstream	11279	HVAEP1_G017768
chr-10	4441176	4442737	5948	22508	.	Upstream	13577	HVAEP1_G017776
chr-10	4456040	4457888	5950	45487	.	PeakInsideFeature	5469	HVAEP1_G017777
chr-10	4459276	4460091	5951	18802	.	PeakInsideFeature	2750	HVAEP1_G017777
chr-10	4514644	4515578	5960	41322	.	Downstream	11689	HVAEP1_G017780
chr-10	4615762	4616664	5968	35888	.	Upstream	7464	HVAEP1_G017783
chr-10	4887999	4890562	5977	51883	.	OverlapEnd	1501	HVAEP1_G017792
chr-10	4908064	4908479	5985	14273	.	Downstream	2743	HVAEP1_G017793
chr-10	5034283	5035665	5991	48396	.	Upstream	3150	HVAEP1_G017798
chr-10	5036058	5036446	5992	35163	.	Upstream	1872	HVAEP1_G017798
chr-10	5055459	5058153	5993	60795	.	Downstream	3763	HVAEP1_G017799
chr-10	5064342	5064705	5996	25534	.	OverlapStart	159	HVAEP1_G017800
chr-10	5065196	5065570	5997	22753	.	Upstream	701	HVAEP1_G017800
chr-10	5078136	5081272	6000	114462	.	Upstream	7461	HVAEP1_G017801
chr-10	5162984	5163563	6010	20264	.	Downstream	5984	HVAEP1_G017808
chr-10	5167462	5168365	6013	24852	.	Downstream	1344	HVAEP1_G017808
chr-10	5168459	5169712	6014	28041	.	FeatureInsidePeak	172	HVAEP1_G017808
chr-10	5213273	5214655	6018	35233	.	Upstream	1287	HVAEP1_G017809
chr-10	5218127	5220487	6019	58309	.	Upstream	6630	HVAEP1_G017809
chr-10	5220804	5222363	6020	50920	.	Upstream	8906	HVAEP1_G017809
chr-10	5231967	5233323	6024	28894	.	Downstream	18008	HVAEP1_G017810
chr-10	5359746	5360884	6038	57296	.	Upstream	3768	HVAEP1_G017813
chr-10	5826623	5827215	6046	17685	.	OverlapStart	191	HVAEP1_G017818
chr-10	6106940	6108477	6063	29207	.	PeakInsideFeature	1242	HVAEP1_G017824
chr-10	6177812	6180098	6069	41777	.	Downstream	7284	HVAEP1_G017827
chr-10	6180294	6182061	6070	43263	.	Downstream	9506	HVAEP1_G017827
chr-10	6210927	6212122	6079	86609	.	Upstream	4312	HVAEP1_G017829
chr-10	6600908	6601541	6097	18392	.	OverlapStart	72	HVAEP1_G017833
chr-10	6610910	6611483	6100	35204	.	Upstream	9900	HVAEP1_G017833
chr-10	6767993	6769008	6106	20802	.	PeakInsideFeature	27716	HVAEP1_G017839
chr-10	6797520	6798481	6111	25604	.	Upstream	1784	HVAEP1_G017839
chr-10	6847018	6848531	6124	24071	.	Downstream	36827	HVAEP1_G017840
chr-10	6881693	6883806	6128	53459	.	PeakInsideFeature	1852	HVAEP1_G017840
chr-10	6885578	6886198	6130	20333	.	Upstream	1287	HVAEP1_G017840
chr-10	6897453	6898946	6131	28346	.	Upstream	2820	HVAEP1_G017841
chr-10	7074893	7075917	6138	17314	.	Upstream	18149	HVAEP1_G017843
chr-10	7166983	7167505	6148	56752	.	Upstream	41772	HVAEP1_G017844
chr-10	7583542	7584202	6160	32103	.	Downstream	94577	HVAEP1_G017858
chr-10	8209551	8210600	6172	47963	.	PeakInsideFeature	14824	HVAEP1_G017867
chr-10	8211686	8213048	6173	208909	.	PeakInsideFeature	12532	HVAEP1_G017867
chr-10	8217204	8218066	6175	17538	.	PeakInsideFeature	7264	HVAEP1_G017867
chr-10	8234812	8235708	6179	24692	.	Upstream	10361	HVAEP1_G017867
chr-10	8274618	8275963	6180	45427	.	PeakInsideFeature	35090	HVAEP1_G017868
chr-10	8277960	8280086	6182	45096	.	PeakInsideFeature	31357	HVAEP1_G017868
chr-10	8432966	8434825	6187	22237	.	PeakInsideFeature	12507	HVAEP1_G017869
chr-10	8459467	8460713	6192	26558	.	PeakInsideFeature	7407	HVAEP1_G017871
chr-10	8479963	8482857	6194	40412	.	Upstream	13913	HVAEP1_G017871
chr-10	8512937	8513288	6198	13629	.	OverlapStart	105	HVAEP1_G017872
chr-10	8513484	8514178	6199	24490	.	PeakInsideFeature	614	HVAEP1_G017872
chr-10	8555753	8556702	6212	27399	.	Upstream	6266	HVAEP1_G017873
chr-10	8572089	8573802	6217	45013	.	PeakInsideFeature	5926	HVAEP1_G017876
chr-10	8574304	8575400	6218	34876	.	PeakInsideFeature	7833	HVAEP1_G017876
chr-10	8937362	8938114	6238	34359	.	Upstream	909	HVAEP1_G017892
chr-10	9002671	9003728	6240	16877	.	Upstream	3360	HVAEP1_G017893
chr-10	9005499	9006096	6241	31769	.	Upstream	762	HVAEP1_G017893
chr-10	9007317	9007971	6243	28754	.	OverlapStart	75	HVAEP1_G017893
chr-10	9009321	9010092	6245	37178	.	OverlapStart	372	HVAEP1_G017893
chr-10	9121016	9122004	6262	17736	.	Upstream	902	HVAEP1_G017896
chr-10	9547660	9549593	6270	22383	.	Upstream	15653	HVAEP1_G017907
chr-10	9558709	9559177	6273	78757	.	Upstream	5336	HVAEP1_G017907
chr-10	9787405	9788087	6289	20695	.	Upstream	5108	HVAEP1_G017908
chr-10	9788426	9788924	6290	16515	.	Upstream	6037	HVAEP1_G017908
chr-10	9797089	9798358	6294	27788	.	Upstream	1679	HVAEP1_G017909
chr-10	9798814	9801119	6295	31553	.	Upstream	3922	HVAEP1_G017909
chr-10	9808233	9808984	6299	22868	.	Upstream	12564	HVAEP1_G017909
chr-10	9938094	9939506	6314	23706	.	Upstream	37619	HVAEP1_G017912
chr-10	9939821	9941148	6315	25227	.	Downstream	38793	HVAEP1_G017913
chr-10	9984050	9985667	6320	40414	.	Upstream	2887	HVAEP1_G017914
chr-10	10074781	10075306	6338	15430	.	Downstream	16545	HVAEP1_G017917
chr-10	10240161	10241201	6349	18933	.	Upstream	11170	HVAEP1_G017924
chr-10	10242385	10245609	6350	34216	.	Upstream	14486	HVAEP1_G017924
chr-10	10428040	10428531	6353	16888	.	Downstream	3600	HVAEP1_G017932
chr-10	10470004	10471224	6362	41925	.	PeakInsideFeature	22521	HVAEP1_G017934
chr-10	10476735	10480151	6364	26837	.	PeakInsideFeature	14692	HVAEP1_G017934
chr-10	10585150	10586586	6373	39746	.	Upstream	14691	HVAEP1_G017939
chr-10	10599232	10599690	6376	19037	.	Downstream	24690	HVAEP1_G017940
chr-10	10710659	10711326	6389	26128	.	OverlapStart	248	HVAEP1_G017941
chr-10	10726761	10727118	6395	14309	.	Upstream	16195	HVAEP1_G017941
chr-10	10838528	10839776	6407	29300	.	PeakInsideFeature	6380	HVAEP1_G017943
chr-10	10968673	10969434	6410	29326	.	Downstream	13544	HVAEP1_G017960
chr-10	11006217	11007586	6416	30510	.	Upstream	8082	HVAEP1_G017962
chr-10	11013138	11013921	6418	29666	.	Upstream	1454	HVAEP1_G017962
chr-10	11018816	11020576	6423	46760	.	PeakInsideFeature	4713	HVAEP1_G017962
chr-10	11092588	11093014	6429	23012	.	Downstream	17012	HVAEP1_G017963
chr-10	11163453	11164620	6438	27675	.	PeakInsideFeature	648	HVAEP1_G017965
chr-10	11178426	11180853	6440	21153	.	Upstream	5021	HVAEP1_G017967
chr-10	11181442	11183947	6441	100235	.	Upstream	1966	HVAEP1_G017967
chr-10	11268015	11268815	6446	17007	.	Upstream	941	HVAEP1_G017968
chr-10	11299907	11302280	6452	53641	.	Upstream	5129	HVAEP1_G017970
chr-10	11303249	11305395	6453	58216	.	Upstream	1900	HVAEP1_G017970
chr-10	11454887	11455995	6460	19465	.	Upstream	9865	HVAEP1_G017972
chr-10	11467933	11470017	6464	31468	.	Downstream	16794	HVAEP1_G017974
chr-10	11507679	11509752	6469	51864	.	Upstream	9964	HVAEP1_G017975
chr-10	11522331	11523239	6470	13958	.	Downstream	4106	HVAEP1_G017975
chr-10	11623738	11624531	6477	17234	.	OverlapStart	223	HVAEP1_G017981
chr-10	11934986	11936243	6483	35040	.	PeakInsideFeature	9765	HVAEP1_G017998
chr-10	11967036	11968143	6488	13957	.	Upstream	12468	HVAEP1_G018001
chr-10	11982631	11984085	6492	16523	.	PeakInsideFeature	2232	HVAEP1_G018002
chr-10	12491853	12492892	6524	28723	.	Downstream	5036	HVAEP1_G018018
chr-10	12587623	12588221	6531	25731	.	Upstream	5497	HVAEP1_G018019
chr-10	12588997	12590361	6532	31034	.	Upstream	7254	HVAEP1_G018019
chr-10	12595138	12596877	6535	60318	.	Downstream	10615	HVAEP1_G018020
chr-10	12771655	12772818	6541	18053	.	FeatureInsidePeak	510	HVAEP1_G018027
chr-10	13435137	13436511	6548	19989	.	Upstream	4022	HVAEP1_G018045
chr-10	13450210	13451962	6551	19163	.	PeakInsideFeature	2776	HVAEP1_G018046
chr-10	13486282	13488947	6553	65928	.	Upstream	14037	HVAEP1_G018047
chr-10	13707131	13707640	6563	14703	.	Upstream	11408	HVAEP1_G018058
chr-10	13763035	13764544	6572	82545	.	OverlapStart	299	HVAEP1_G018063
chr-10	13767561	13770318	6576	24968	.	Upstream	5449	HVAEP1_G018063
chr-10	13771423	13773779	6577	65918	.	Upstream	9111	HVAEP1_G018063
chr-10	14088492	14089824	6589	27213	.	Upstream	4565	HVAEP1_G018069
chr-10	14189261	14190766	6596	32628	.	Downstream	2420	HVAEP1_G018073
chr-10	14197798	14199668	6598	25302	.	OverlapStart	638	HVAEP1_G018075
chr-10	14199757	14200224	6599	17439	.	Upstream	1895	HVAEP1_G018075
chr-10	14247252	14248949	6606	32325	.	Upstream	10514	HVAEP1_G018076
chr-10	14292505	14293461	6610	25944	.	Upstream	10256	HVAEP1_G018079
chr-10	14337128	14337841	6614	39602	.	PeakInsideFeature	1733	HVAEP1_G018081
chr-10	14338307	14339794	6615	39252	.	OverlapStart	167	HVAEP1_G018081
chr-10	14339974	14340556	6616	20720	.	Upstream	1048	HVAEP1_G018081
chr-10	14340763	14343593	6617	202737	.	Upstream	2961	HVAEP1_G018081
chr-10	14343818	14345513	6618	27451	.	Upstream	5448	HVAEP1_G018081
chr-10	14346197	14347430	6619	36080	.	Upstream	7596	HVAEP1_G018081
chr-10	14453702	14454580	6622	16497	.	PeakInsideFeature	959	HVAEP1_G018083
chr-10	14613687	14614934	6634	33051	.	OverlapStart	323	HVAEP1_G018086
chr-10	14615258	14616481	6635	33138	.	Upstream	1882	HVAEP1_G018086
chr-10	14679375	14681491	6644	38877	.	PeakInsideFeature	33010	HVAEP1_G018088
chr-10	14724030	14724558	6652	23119	.	Upstream	31313	HVAEP1_G018089
chr-10	14744445	14745766	6654	33447	.	Upstream	10502	HVAEP1_G018089
chr-10	14754028	14756879	6657	55934	.	OverlapStart	154	HVAEP1_G018089
chr-10	15074585	15076650	6681	30290	.	Upstream	1388	HVAEP1_G018098
chr-10	15161861	15162657	6691	20936	.	Downstream	54683	HVAEP1_G018100
chr-10	15193875	15196912	6696	147267	.	Downstream	51269	HVAEP1_G018101
chr-10	15197192	15198741	6697	70985	.	Downstream	48696	HVAEP1_G018101
chr-10	15198874	15202045	6698	158356	.	Downstream	46203	HVAEP1_G018101
chr-10	15202227	15202893	6699	44749	.	Downstream	44102	HVAEP1_G018101
chr-10	15334839	15336467	6712	22309	.	PeakInsideFeature	1783	HVAEP1_G018105
chr-10	15365054	15365822	6719	19777	.	PeakInsideFeature	2464	HVAEP1_G018104
chr-10	15388483	15388998	6723	14409	.	Upstream	6227	HVAEP1_G018107
chr-10	15506686	15511015	6738	186115	.	OverlapEnd	3022	HVAEP1_G018108
chr-10	15511464	15512499	6739	42781	.	OverlapStart	109	HVAEP1_G018108
chr-10	15527286	15528510	6745	34443	.	Downstream	4811	HVAEP1_G018109
chr-10	15550258	15551309	6749	24382	.	Upstream	18074	HVAEP1_G018109
chr-10	15678901	15680296	6756	35926	.	Upstream	945	HVAEP1_G018111
chr-10	15739377	15740091	6759	18234	.	OverlapStart	5	HVAEP1_G018113
chr-10	15752006	15752972	6760	43206	.	Upstream	1789	HVAEP1_G018113
chr-10	15753237	15753749	6761	16351	.	Upstream	785	HVAEP1_G018113
chr-10	15753865	15754557	6762	18284	.	OverlapStart	67	HVAEP1_G018113
chr-10	15754803	15755463	6763	19637	.	Upstream	781	HVAEP1_G018113
chr-10	15769561	15770011	6767	23226	.	Upstream	2374	HVAEP1_G018114
chr-10	15772523	15773667	6770	80208	.	PeakInsideFeature	935	HVAEP1_G018114
chr-10	15775217	15775501	6773	15100	.	Upstream	1043	HVAEP1_G018114
chr-10	15775710	15776646	6774	57567	.	OverlapStart	224	HVAEP1_G018114
chr-10	15777182	15778587	6775	38043	.	OverlapStart	163	HVAEP1_G018114
chr-10	15781301	15781560	6778	16652	.	Downstream	3709	HVAEP1_G018114
chr-10	15854923	15858829	6783	55920	.	Upstream	7910	HVAEP1_G018115
chr-10	16095371	16097477	6797	29143	.	PeakInsideFeature	19980	HVAEP1_G018120
chr-10	16097613	16099073	6798	29433	.	PeakInsideFeature	21899	HVAEP1_G018120
chr-10	16106492	16107309	6803	18499	.	PeakInsideFeature	30456	HVAEP1_G018120
chr-10	16203860	16204269	6809	20352	.	PeakInsideFeature	2415	HVAEP1_G018126
chr-10	16241418	16246228	6812	124641	.	Upstream	8248	HVAEP1_G018127
chr-10	16246326	16247771	6813	29891	.	Upstream	11473	HVAEP1_G018127
chr-10	16257609	16258186	6816	16734	.	Upstream	3016	HVAEP1_G018128
chr-10	16265019	16265451	6820	21182	.	Downstream	2274	HVAEP1_G018128
chr-10	16354316	16354844	6828	16041	.	Upstream	1191	HVAEP1_G018131
chr-10	16356073	16356654	6830	18355	.	PeakInsideFeature	592	HVAEP1_G018131
chr-10	16356782	16358000	6831	23182	.	PeakInsideFeature	1620	HVAEP1_G018131
chr-10	16485149	16485752	6832	17617	.	Downstream	4620	HVAEP1_G018134
chr-10	16490318	16491380	6835	27791	.	OverlapStart	74	HVAEP1_G018134
chr-10	16515358	16516350	6843	28779	.	Upstream	22800	HVAEP1_G018134
chr-10	16521331	16523113	6844	18695	.	Upstream	25475	HVAEP1_G018135
chr-10	16722374	16723209	6852	16841	.	Upstream	13219	HVAEP1_G018138
chr-10	16730837	16732790	6854	48698	.	Upstream	4197	HVAEP1_G018138
chr-10	16828985	16829363	6860	14948	.	Upstream	10366	HVAEP1_G018139
chr-10	16861133	16861603	6861	27929	.	PeakInsideFeature	708	HVAEP1_G018141
chr-10	16924004	16925317	6867	46824	.	Upstream	2317	HVAEP1_G018142
chr-10	17248181	17249401	6875	22123	.	Downstream	2815	HVAEP1_G018150
chr-10	17415798	17417033	6883	14159	.	PeakInsideFeature	1351	HVAEP1_G018156
chr-10	17613612	17616328	6898	53116	.	Upstream	32608	HVAEP1_G018160
chr-10	17617331	17617776	6900	49307	.	Upstream	35191	HVAEP1_G018160
chr-10	17643503	17647021	6907	275869	.	PeakInsideFeature	9348	HVAEP1_G018161
chr-10	17647668	17648107	6908	36726	.	PeakInsideFeature	6723	HVAEP1_G018161
chr-10	17735878	17736761	6913	18356	.	PeakInsideFeature	17343	HVAEP1_G018164
chr-10	17928799	17929540	6933	18985	.	Upstream	15686	HVAEP1_G018169
chr-10	18912213	18914178	6960	24980	.	Upstream	13031	HVAEP1_G018198
chr-10	18996444	18996916	6970	25857	.	Upstream	12844	HVAEP1_G018200
chr-10	19003812	19004819	6973	20054	.	Upstream	5209	HVAEP1_G018200
chr-10	19006124	19007174	6976	33898	.	Upstream	2875	HVAEP1_G018200
chr-10	19170861	19171651	6995	18614	.	Upstream	1261	HVAEP1_G018207
chr-10	19236156	19237437	7000	15880	.	Upstream	5704	HVAEP1_G018212
chr-10	19310627	19313033	7004	31850	.	Upstream	27123	HVAEP1_G018214
chr-10	19318496	19319595	7006	59147	.	Upstream	19908	HVAEP1_G018214
chr-10	19319712	19323184	7007	79256	.	Upstream	17505	HVAEP1_G018214
chr-10	19335479	19337656	7010	43875	.	Upstream	2386	HVAEP1_G018214
chr-10	19492400	19493353	7018	15859	.	Upstream	2175	HVAEP1_G018220
chr-10	19566055	19567395	7035	17046	.	PeakInsideFeature	2274	HVAEP1_G018222
chr-10	19621589	19622552	7042	17151	.	OverlapStart	313	HVAEP1_G018225
chr-10	19622712	19624066	7043	60190	.	Upstream	1006	HVAEP1_G018225
chr-10	19637355	19638452	7046	27398	.	PeakInsideFeature	7496	HVAEP1_G018227
chr-10	19677806	19679404	7050	39136	.	Upstream	4133	HVAEP1_G018228
chr-10	19681694	19682035	7052	21237	.	Upstream	874	HVAEP1_G018228
chr-10	19700709	19701572	7059	23069	.	Upstream	1233	HVAEP1_G018228
chr-10	19701663	19706362	7060	144414	.	OverlapStart	1639	HVAEP1_G018228
chr-10	19707498	19708747	7062	18994	.	PeakInsideFeature	5749	HVAEP1_G018228
chr-10	19722538	19724039	7064	25366	.	Downstream	20915	HVAEP1_G018228
chr-10	19751095	19751491	7066	20664	.	OverlapStart	143	HVAEP1_G018229
chr-10	19822879	19823620	7078	30332	.	Upstream	1362	HVAEP1_G018234
chr-10	19911127	19913159	7086	23114	.	Downstream	26662	HVAEP1_G018237
chr-10	19923611	19924495	7087	17217	.	Downstream	14752	HVAEP1_G018237
chr-10	19926816	19928270	7089	25454	.	Downstream	11262	HVAEP1_G018237
chr-10	19933435	19935272	7091	31180	.	Downstream	4452	HVAEP1_G018237
chr-10	19935914	19937076	7093	34291	.	Downstream	2310	HVAEP1_G018237
chr-10	19974886	19975807	7099	40936	.	Upstream	8722	HVAEP1_G018239
chr-10	19979962	19980735	7102	15550	.	Upstream	3720	HVAEP1_G018239
chr-10	19983684	19984267	7104	13916	.	OverlapStart	93	HVAEP1_G018239
chr-10	19984624	19985006	7105	24308	.	PeakInsideFeature	747	HVAEP1_G018239
chr-10	19985279	19986107	7106	24074	.	PeakInsideFeature	1625	HVAEP1_G018239
chr-10	19986202	19987118	7107	20397	.	PeakInsideFeature	2592	HVAEP1_G018239
chr-10	20137478	20140095	7111	38234	.	Downstream	3726	HVAEP1_G018243
chr-10	20174928	20176024	7117	40443	.	Downstream	3334	HVAEP1_G018245
chr-10	20196272	20197188	7121	16980	.	Upstream	1540	HVAEP1_G018248
chr-10	20256661	20257310	7130	44355	.	Downstream	13279	HVAEP1_G018254
chr-10	20297480	20299028	7134	30377	.	OverlapStart	488	HVAEP1_G018256
chr-10	20329791	20331387	7135	46896	.	Downstream	8108	HVAEP1_G018257
chr-10	20340583	20345151	7140	74524	.	PeakInsideFeature	3316	HVAEP1_G018258
chr-10	20346607	20347681	7142	38402	.	Upstream	961	HVAEP1_G018258
chr-10	20358044	20360118	7146	28625	.	Upstream	12898	HVAEP1_G018258
chr-10	20399820	20400699	7147	17222	.	Downstream	3155	HVAEP1_G018262
chr-10	20497779	20500396	7156	135674	.	PeakInsideFeature	23864	HVAEP1_G018266
chr-10	20610482	20611241	7169	36050	.	Upstream	4674	HVAEP1_G018274
chr-10	20613191	20615173	7171	31006	.	Upstream	1353	HVAEP1_G018274
chr-10	20903482	20903871	7182	26830	.	Upstream	7084	HVAEP1_G018282
chr-10	20907966	20909227	7185	22870	.	Upstream	2164	HVAEP1_G018282
chr-10	20911395	20912835	7186	56481	.	PeakInsideFeature	1355	HVAEP1_G018282
chr-10	21012327	21012711	7192	19472	.	PeakInsideFeature	2853	HVAEP1_G018291
chr-10	21084177	21084895	7200	19643	.	Downstream	23651	HVAEP1_G018294
chr-10	21158205	21159661	7203	46044	.	Upstream	3723	HVAEP1_G018295
chr-10	21160728	21161976	7205	27803	.	Upstream	3898	HVAEP1_G018296
chr-10	21162769	21164302	7207	29347	.	Upstream	1715	HVAEP1_G018296
chr-10	21166160	21168224	7209	39926	.	OverlapEnd	1942	HVAEP1_G018296
chr-10	21234689	21238181	7214	40538	.	Downstream	5158	HVAEP1_G018298
chr-10	21238271	21239376	7215	19438	.	Downstream	7546	HVAEP1_G018298
chr-10	21368925	21373085	7223	90558	.	Downstream	8383	HVAEP1_G018305
chr-10	21373292	21374785	7224	78604	.	Downstream	5350	HVAEP1_G018305
chr-10	21380258	21381712	7228	40370	.	Upstream	1597	HVAEP1_G018305
chr-10	21433283	21434078	7237	14588	.	Upstream	5802	HVAEP1_G018308
chr-10	21524938	21525523	7241	27072	.	Upstream	423	HVAEP1_G018309
chr-10	21701475	21701922	7250	22804	.	PeakInsideFeature	1044	HVAEP1_G018315
chr-10	21791492	21792777	7259	28658	.	OverlapStart	189	HVAEP1_G018321
chr-10	21912307	21912955	7265	23501	.	Upstream	1879	HVAEP1_G018323
chr-10	21924436	21929667	7268	148517	.	Upstream	6966	HVAEP1_G018325
chr-10	21987859	21988615	7270	16220	.	OverlapStart	99	HVAEP1_G018326
chr-10	21992212	21994345	7271	33157	.	Upstream	5140	HVAEP1_G018326
chr-10	22010514	22011208	7273	37648	.	Downstream	11785	HVAEP1_G018327
chr-10	22081573	22082656	7277	23797	.	OverlapEnd	2820	HVAEP1_G018329
chr-10	22082744	22083442	7278	45649	.	PeakInsideFeature	1841	HVAEP1_G018329
chr-10	22086645	22087756	7281	17278	.	Upstream	2266	HVAEP1_G018329
chr-10	22186032	22188700	7288	32730	.	Upstream	6123	HVAEP1_G018331
chr-10	22195028	22197311	7289	105333	.	Upstream	2590	HVAEP1_G018332
chr-10	22358664	22360752	7302	34834	.	OverlapStart	682	HVAEP1_G018337
chr-10	22526451	22527637	7316	23959	.	Upstream	11270	HVAEP1_G018344
chr-10	22537385	22538676	7320	19269	.	OverlapStart	284	HVAEP1_G018344
chr-10	22653840	22655486	7332	88314	.	Upstream	6560	HVAEP1_G018348
chr-10	22766357	22766838	7338	22509	.	Upstream	1198	HVAEP1_G018352
chr-10	22767180	22767883	7339	21417	.	OverlapStart	264	HVAEP1_G018352
chr-10	22951642	22954239	7351	81940	.	Downstream	11267	HVAEP1_G018357
chr-10	23434450	23435231	7366	34653	.	Upstream	2271	HVAEP1_G018369
chr-10	24724905	24725573	7412	58845	.	Downstream	18237	HVAEP1_G018401
chr-10	25024408	25025291	7433	17037	.	Upstream	2645	HVAEP1_G018414
chr-10	25025429	25026048	7434	22227	.	Upstream	1756	HVAEP1_G018414
chr-10	25271251	25273358	7451	70451	.	PeakInsideFeature	5633	HVAEP1_G018420
chr-10	25485585	25486328	7460	20020	.	Upstream	4777	HVAEP1_G018423
chr-10	25581244	25582448	7473	29305	.	Upstream	22410	HVAEP1_G018429
chr-10	25850340	25851220	7481	87931	.	Upstream	14826	HVAEP1_G018433
chr-10	26096116	26096887	7498	28775	.	OverlapStart	40	HVAEP1_G018444
chr-10	26107562	26108473	7499	31118	.	PeakInsideFeature	1835	HVAEP1_G018445
chr-10	26116344	26118331	7504	57736	.	Upstream	1971	HVAEP1_G018444
chr-10	26237209	26238113	7514	18322	.	OverlapStart	315	HVAEP1_G018447
chr-10	26238232	26238881	7515	40865	.	OverlapStart	262	HVAEP1_G018447
chr-10	26245912	26247113	7516	29691	.	Upstream	8218	HVAEP1_G018447
chr-10	26247894	26248354	7517	15493	.	Upstream	9830	HVAEP1_G018447
chr-10	26271070	26271401	7524	20774	.	PeakInsideFeature	1692	HVAEP1_G018448
chr-10	26271732	26272225	7525	16386	.	PeakInsideFeature	949	HVAEP1_G018448
chr-10	26518775	26519841	7533	18360	.	PeakInsideFeature	536	HVAEP1_G018458
chr-10	26888340	26890675	7545	45620	.	Upstream	8742	HVAEP1_G018477
chr-10	26899768	26900795	7548	19190	.	PeakInsideFeature	2032	HVAEP1_G018477
chr-10	27162763	27164426	7551	42882	.	Upstream	1403	HVAEP1_G018481
chr-10	27418255	27421167	7565	70583	.	Upstream	5752	HVAEP1_G018490
chr-10	27428451	27429289	7568	26046	.	PeakInsideFeature	982	HVAEP1_G018490
chr-10	27635934	27637241	7579	16553	.	Upstream	3679	HVAEP1_G018493
chr-10	27641681	27643053	7583	31303	.	PeakInsideFeature	2101	HVAEP1_G018493
chr-10	27657198	27658184	7589	27466	.	Upstream	15455	HVAEP1_G018494
chr-10	27672794	27673834	7594	17701	.	OverlapStart	168	HVAEP1_G018494
chr-10	27674094	27675651	7595	49988	.	PeakInsideFeature	1364	HVAEP1_G018494
chr-10	27676622	27677874	7596	36834	.	PeakInsideFeature	3740	HVAEP1_G018494
chr-10	27678181	27679681	7597	36673	.	PeakInsideFeature	5423	HVAEP1_G018494
chr-10	27680259	27681970	7598	43455	.	PeakInsideFeature	7606	HVAEP1_G018494
chr-10	27759912	27761309	7606	28309	.	Downstream	12366	HVAEP1_G018497
chr-10	27771451	27772970	7608	38408	.	Upstream	19967	HVAEP1_G018498
chr-10	27776960	27778170	7612	31392	.	Upstream	14612	HVAEP1_G018498
chr-10	27800119	27802353	7615	77119	.	OverlapStart	982	HVAEP1_G018499
chr-10	27853200	27854475	7622	19393	.	PeakInsideFeature	12709	HVAEP1_G018500
chr-10	27859450	27860044	7624	26207	.	PeakInsideFeature	18619	HVAEP1_G018500
chr-10	27863625	27864465	7626	21104	.	PeakInsideFeature	22917	HVAEP1_G018500
chr-10	28082714	28083456	7643	20930	.	Upstream	7573	HVAEP1_G018508
chr-10	28128395	28129122	7646	20429	.	Upstream	2191	HVAEP1_G018512
chr-10	28184836	28185636	7647	20841	.	Upstream	12150	HVAEP1_G018513
chr-10	28448093	28449351	7660	55274	.	Upstream	5593	HVAEP1_G018519
chr-10	28452640	28454067	7664	25941	.	Upstream	962	HVAEP1_G018519
chr-10	28455891	28456770	7666	16243	.	OverlapStart	89	HVAEP1_G018519
chr-10	28460007	28461340	7668	24027	.	Upstream	2452	HVAEP1_G018519
chr-10	28461480	28463038	7669	58279	.	Upstream	866	HVAEP1_G018519
chr-10	28463123	28463986	7670	35432	.	OverlapStart	429	HVAEP1_G018519
chr-10	28517142	28518033	7679	16772	.	PeakInsideFeature	3140	HVAEP1_G018521
chr-10	28519815	28520821	7681	71359	.	OverlapStart	409	HVAEP1_G018521
chr-10	28811762	28812588	7711	29847	.	PeakInsideFeature	8414	HVAEP1_G018529
chr-10	28819981	28820744	7712	24673	.	OverlapStart	227	HVAEP1_G018529
chr-10	28924373	28925041	7716	24540	.	Upstream	10509	HVAEP1_G018532
chr-10	28934204	28934592	7717	27954	.	Upstream	818	HVAEP1_G018532
chr-10	28937188	28939230	7718	34031	.	PeakInsideFeature	2993	HVAEP1_G018532
chr-10	28966608	28969943	7726	37093	.	PeakInsideFeature	12427	HVAEP1_G018533
chr-10	29066718	29067491	7735	29366	.	Upstream	1631	HVAEP1_G018539
chr-10	29171423	29172044	7743	16116	.	Upstream	13433	HVAEP1_G018543
chr-10	29260236	29261395	7752	55398	.	Upstream	1196	HVAEP1_G018545
chr-10	29341604	29343750	7763	24729	.	Downstream	44274	HVAEP1_G018549
chr-10	29349258	29351052	7765	59973	.	Downstream	36796	HVAEP1_G018549
chr-10	29351841	29352471	7766	17523	.	Downstream	34795	HVAEP1_G018549
chr-10	29378560	29379491	7769	24522	.	Downstream	7926	HVAEP1_G018549
chr-10	29380616	29382030	7770	25173	.	Downstream	5628	HVAEP1_G018549
chr-10	29385563	29386330	7773	35739	.	PeakInsideFeature	1005	HVAEP1_G018549
chr-10	29386568	29386899	7774	17145	.	PeakInsideFeature	218	HVAEP1_G018549
chr-10	29434163	29435322	7784	18049	.	Downstream	4377	HVAEP1_G018550
chr-10	29438517	29439810	7786	30599	.	OverlapStart	44	HVAEP1_G018550
chr-10	29503745	29505881	7792	35249	.	Upstream	2510	HVAEP1_G018553
chr-10	29596888	29598791	7797	33536	.	Upstream	5684	HVAEP1_G018559
chr-10	29714699	29715104	7807	18573	.	Upstream	8659	HVAEP1_G018567
chr-10	29776536	29777167	7810	24488	.	PeakInsideFeature	11904	HVAEP1_G018568
chr-10	29919504	29920327	7820	25051	.	Upstream	3712	HVAEP1_G018571
chr-10	30432708	30433352	7840	17246	.	PeakInsideFeature	10786	HVAEP1_G018593
chr-10	30448883	30449697	7847	14652	.	Upstream	1882	HVAEP1_G018593
chr-10	30610148	30614838	7864	97530	.	OverlapStart	1859	HVAEP1_G018597
chr-10	30617468	30617955	7867	15906	.	Downstream	3359	HVAEP1_G018597
chr-10	30636256	30639877	7869	169658	.	Downstream	23714	HVAEP1_G018597
chr-10	30763514	30764418	7873	51314	.	Upstream	4315	HVAEP1_G018601
chr-10	30923317	30925632	7885	41115	.	Upstream	1802	HVAEP1_G018608
chr-10	30940761	30941543	7887	22055	.	Upstream	3454	HVAEP1_G018609
chr-10	30951823	30953255	7889	66744	.	OverlapStart	594	HVAEP1_G018610
chr-10	31145328	31145753	7900	24831	.	Downstream	4511	HVAEP1_G018618
chr-10	31146265	31146761	7901	12958	.	Downstream	5484	HVAEP1_G018618
chr-10	31149817	31150669	7902	15952	.	Downstream	9214	HVAEP1_G018618
chr-10	31183609	31184625	7905	50188	.	Downstream	13379	HVAEP1_G018620
chr-10	31197844	31198566	7908	24120	.	Downstream	27467	HVAEP1_G018620
chr-10	31203321	31203664	7909	18221	.	Upstream	26950	HVAEP1_G018621
chr-10	31232208	31234535	7919	35665	.	PeakInsideFeature	2929	HVAEP1_G018621
chr-10	31319436	31321661	7920	85864	.	Downstream	22157	HVAEP1_G018622
chr-10	31321783	31322487	7921	26016	.	Downstream	20570	HVAEP1_G018622
chr-10	31325422	31326228	7922	14817	.	Downstream	16880	HVAEP1_G018622
chr-10	31417520	31419545	7934	28353	.	Downstream	10029	HVAEP1_G018626
chr-10	31484454	31486298	7942	139756	.	OverlapStart	743	HVAEP1_G018627
chr-10	31533479	31535418	7946	50351	.	Upstream	10910	HVAEP1_G018628
chr-10	31537344	31537988	7948	13334	.	Upstream	14128	HVAEP1_G018628
chr-10	31547365	31549119	7952	60225	.	Upstream	24704	HVAEP1_G018628
chr-10	31576027	31578030	7954	21702	.	Upstream	53490	HVAEP1_G018628
chr-10	31592390	31594446	7956	36853	.	Downstream	53909	HVAEP1_G018629
chr-10	31648185	31649881	7959	64478	.	Upstream	1706	HVAEP1_G018629
chr-10	31654189	31655416	7962	51031	.	OverlapStart	296	HVAEP1_G018631
chr-10	31730300	31732324	7965	28913	.	OverlapStart	659	HVAEP1_G018633
chr-10	31737631	31738568	7968	15499	.	PeakInsideFeature	6128	HVAEP1_G018633
chr-10	31966675	31967309	7991	25514	.	Downstream	12098	HVAEP1_G018644
chr-10	31985078	31985773	7992	20726	.	Upstream	4853	HVAEP1_G018645
chr-10	32004289	32005455	7995	36901	.	Upstream	1102	HVAEP1_G018647
chr-10	32007876	32008674	7998	45326	.	OverlapEnd	2164	HVAEP1_G018647
chr-10	32070641	32071081	8007	11704	.	Upstream	788	HVAEP1_G018651
chr-10	32071165	32071602	8008	16740	.	Upstream	266	HVAEP1_G018651
chr-10	32073121	32074157	8009	22778	.	PeakInsideFeature	947	HVAEP1_G018651
chr-10	32249388	32249867	8019	31844	.	Upstream	6083	HVAEP1_G018654
chr-10	32290336	32291171	8031	16735	.	Upstream	621	HVAEP1_G018655
chr-10	32451086	32451872	8038	13551	.	Downstream	1806	HVAEP1_G018658
chr-10	32452870	32455468	8040	65445	.	FeatureInsidePeak	884	HVAEP1_G018658
chr-10	32749761	32750859	8048	15279	.	PeakInsideFeature	1455	HVAEP1_G018664
chr-10	32793068	32794944	8054	83646	.	Upstream	1414	HVAEP1_G018665
chr-10	32796274	32799432	8055	67784	.	Upstream	5261	HVAEP1_G018665
chr-10	33110499	33112972	8067	58554	.	OverlapStart	1105	HVAEP1_G018671
chr-10	33113277	33114119	8068	19588	.	OverlapStart	385	HVAEP1_G018670
chr-10	33188945	33189601	8074	20381	.	Upstream	5710	HVAEP1_G018672
chr-10	33192740	33193942	8076	33704	.	Upstream	9778	HVAEP1_G018672
chr-10	33206658	33207676	8080	26723	.	Upstream	23604	HVAEP1_G018672
chr-10	33217690	33219304	8081	30741	.	Upstream	34295	HVAEP1_G018674
chr-10	33219724	33220430	8082	35898	.	Upstream	32715	HVAEP1_G018674
chr-10	33224860	33225499	8086	15495	.	Upstream	27613	HVAEP1_G018674
chr-10	33229507	33230115	8088	40630	.	Upstream	22981	HVAEP1_G018674
chr-10	33231101	33233535	8089	47224	.	Upstream	20474	HVAEP1_G018674
chr-10	33237334	33238062	8090	24596	.	Upstream	15094	HVAEP1_G018674
chr-10	33316814	33318003	8100	21838	.	Upstream	854	HVAEP1_G018675
chr-10	33319339	33319633	8102	22919	.	PeakInsideFeature	1224	HVAEP1_G018675
chr-10	33356820	33358064	8115	33051	.	Upstream	2406	HVAEP1_G018676
chr-10	33436471	33438959	8117	18414	.	PeakInsideFeature	3138	HVAEP1_G018677
chr-10	33699193	33699758	8145	35244	.	PeakInsideFeature	4802	HVAEP1_G018688
chr-10	33701202	33703169	8146	47389	.	PeakInsideFeature	2092	HVAEP1_G018688
chr-10	33915900	33917124	8151	28370	.	Upstream	3476	HVAEP1_G018695
chr-10	33917944	33918953	8152	52855	.	Upstream	4123	HVAEP1_G018696
chr-10	33977466	33979485	8168	16779	.	Upstream	14801	HVAEP1_G018697
chr-10	34010045	34011392	8170	20581	.	Upstream	12056	HVAEP1_G018699
chr-10	34394062	34394804	8200	13390	.	Upstream	4037	HVAEP1_G018714
chr-10	34397929	34398284	8202	27705	.	Upstream	364	HVAEP1_G018714
chr-10	34400475	34401120	8203	16793	.	Downstream	2327	HVAEP1_G018714
chr-10	34459338	34461196	8208	55644	.	Downstream	4847	HVAEP1_G018718
chr-10	34501797	34502515	8212	15550	.	Upstream	2159	HVAEP1_G018719
chr-10	34763154	34764327	8225	23513	.	Upstream	22725	HVAEP1_G018728
chr-10	34821179	34822633	8234	45178	.	Upstream	12109	HVAEP1_G018729
chr-10	34823388	34824441	8236	45905	.	Upstream	10101	HVAEP1_G018729
chr-10	34883936	34884630	8246	16760	.	Upstream	1461	HVAEP1_G018731
chr-10	35429768	35431069	8254	36931	.	Downstream	9856	HVAEP1_G018749
chr-10	35637894	35640136	8265	54208	.	Downstream	23189	HVAEP1_G018756
chr-10	35674194	35675139	8267	45389	.	Upstream	12462	HVAEP1_G018756
chr-10	35796523	35806042	8268	292873	.	OverlapStart	3348	HVAEP1_G018764
chr-10	36151272	36151877	8281	39140	.	Upstream	4189	HVAEP1_G018777
chr-10	36154410	36155120	8283	16261	.	Upstream	998	HVAEP1_G018777
chr-10	36161030	36162569	8288	43705	.	PeakInsideFeature	6036	HVAEP1_G018777
chr-10	36355978	36356724	8297	19576	.	Upstream	5887	HVAEP1_G018781
chr-10	36359978	36360373	8299	26557	.	Upstream	2063	HVAEP1_G018781
chr-10	36377564	36378256	8306	20633	.	PeakInsideFeature	5142	HVAEP1_G018782
chr-10	36596284	36596894	8314	14157	.	PeakInsideFeature	5363	HVAEP1_G018781
chr-10	36726643	36728275	8319	16851	.	Downstream	5884	HVAEP1_G018788
chr-10	36728871	36729388	8320	15487	.	Downstream	7554	HVAEP1_G018788
chr-10	37155340	37156617	8328	20788	.	Upstream	21019	HVAEP1_G018809
chr-10	37528294	37530203	8334	18480	.	OverlapEnd	2280	HVAEP1_G018816
chr-10	37531129	37531798	8335	27910	.	OverlapStart	65	HVAEP1_G018816
chr-10	37532027	37532573	8336	27927	.	Upstream	772	HVAEP1_G018816
chr-10	37696498	37697534	8337	26868	.	Upstream	7326	HVAEP1_G018823
chr-10	37878052	37881168	8345	30215	.	Upstream	21404	HVAEP1_G018827
chr-10	37882092	37883492	8346	62865	.	Upstream	18222	HVAEP1_G018827
chr-10	38037156	38038955	8363	34531	.	Upstream	16866	HVAEP1_G018835
chr-10	38051121	38053904	8367	69455	.	Upstream	2409	HVAEP1_G018835
chr-10	38054199	38055748	8368	102849	.	FeatureInsidePeak	52	HVAEP1_G018835
chr-10	38058587	38060348	8371	50235	.	Downstream	4546	HVAEP1_G018835
chr-10	38066020	38066991	8374	21124	.	Downstream	11584	HVAEP1_G018835
chr-10	38087766	38089465	8381	53691	.	Upstream	2093	HVAEP1_G018836
chr-10	38089849	38090892	8382	72638	.	OverlapStart	338	HVAEP1_G018836
chr-10	38104210	38105109	8384	63546	.	Downstream	7175	HVAEP1_G018837
chr-10	38108406	38108779	8386	16186	.	Downstream	11108	HVAEP1_G018837
chr-10	38144081	38149380	8391	189410	.	FeatureInsidePeak	994	HVAEP1_G018840
chr-10	38318876	38320458	8396	33814	.	Upstream	6453	HVAEP1_G018848
chr-10	38353215	38355010	8407	22158	.	Upstream	3889	HVAEP1_G018852
chr-10	38479372	38481675	8416	50983	.	Upstream	3235	HVAEP1_G018856
chr-10	39058048	39058861	8441	19983	.	Upstream	4072	HVAEP1_G018868
chr-10	39061084	39062599	8443	20057	.	OverlapStart	685	HVAEP1_G018868
chr-10	39063208	39064307	8444	56930	.	PeakInsideFeature	1231	HVAEP1_G018868
chr-10	39064447	39065491	8445	20867	.	OverlapEnd	2443	HVAEP1_G018868
chr-10	39112275	39113259	8450	25999	.	OverlapStart	470	HVAEP1_G018869
chr-10	39233982	39235079	8458	21802	.	Upstream	1573	HVAEP1_G018874
chr-10	39268343	39269079	8464	36202	.	PeakInsideFeature	4335	HVAEP1_G018876
chr-10	39270240	39271523	8465	15824	.	PeakInsideFeature	2165	HVAEP1_G018876
chr-10	39398395	39400166	8474	52174	.	Upstream	14528	HVAEP1_G018878
chr-10	39401706	39403242	8475	105181	.	Upstream	17722	HVAEP1_G018878
chr-10	39404493	39406037	8476	33141	.	Upstream	20513	HVAEP1_G018878
chr-10	39424934	39425434	8481	21547	.	Upstream	13909	HVAEP1_G018879
chr-10	39435830	39438020	8482	57385	.	Upstream	2168	HVAEP1_G018879
chr-10	39438112	39438751	8483	22211	.	Upstream	662	HVAEP1_G018879
chr-10	39514895	39515915	8486	27339	.	Downstream	3308	HVAEP1_G018881
chr-10	39516490	39517146	8487	14096	.	OverlapEnd	1895	HVAEP1_G018881
chr-10	39668530	39670378	8491	26652	.	PeakInsideFeature	8780	HVAEP1_G018882
chr-10	39674691	39676587	8493	38099	.	PeakInsideFeature	2595	HVAEP1_G018882
chr-10	39690760	39693301	8498	138131	.	Upstream	7982	HVAEP1_G018883
chr-10	39695132	39695817	8499	27272	.	Upstream	4538	HVAEP1_G018883
chr-10	39696951	39699291	8501	70980	.	Upstream	1891	HVAEP1_G018883
chr-10	39799106	39800336	8513	30194	.	PeakInsideFeature	1003	HVAEP1_G018887
chr-10	39801136	39802568	8515	60727	.	Upstream	1128	HVAEP1_G018887
chr-10	39809854	39810624	8517	35121	.	OverlapEnd	967	HVAEP1_G018888
chr-10	39810761	39811221	8518	17759	.	OverlapStart	215	HVAEP1_G018888
chr-10	39811404	39812529	8519	79977	.	Upstream	760	HVAEP1_G018888
chr-10	40048923	40049673	8527	17219	.	Upstream	6576	HVAEP1_G018903
chr-10	40113890	40114596	8530	18491	.	Upstream	14666	HVAEP1_G018906
chr-10	40498771	40499922	8538	38366	.	Upstream	2332	HVAEP1_G018922
chr-10	40523114	40523650	8540	18481	.	Downstream	21704	HVAEP1_G018922
chr-10	40523751	40524910	8541	39059	.	Downstream	22652	HVAEP1_G018922
chr-10	40745894	40747089	8557	24859	.	Downstream	26721	HVAEP1_G018930
chr-10	40825342	40827553	8559	60199	.	PeakInsideFeature	2338	HVAEP1_G018933
chr-10	40832849	40833538	8562	17409	.	Upstream	4408	HVAEP1_G018933
chr-10	40833827	40834243	8563	32261	.	Upstream	5250	HVAEP1_G018933
chr-10	40850090	40859112	8571	283648	.	Upstream	25816	HVAEP1_G018933
chr-10	40939236	40944271	8580	64532	.	Downstream	29771	HVAEP1_G018935
chr-10	41032820	41033431	8590	20998	.	PeakInsideFeature	5668	HVAEP1_G018934
chr-10	41043120	41044298	8593	23263	.	Upstream	4916	HVAEP1_G018934
chr-10	41044500	41045700	8594	45490	.	Upstream	6307	HVAEP1_G018934
chr-10	41050231	41050891	8598	17920	.	Upstream	11768	HVAEP1_G018934
chr-10	41066513	41067141	8603	20569	.	Upstream	6019	HVAEP1_G018936
chr-10	41067224	41068963	8604	149352	.	Upstream	4753	HVAEP1_G018936
chr-10	41070533	41071014	8606	59301	.	Upstream	2073	HVAEP1_G018936
chr-10	41074242	41077348	8608	59396	.	PeakInsideFeature	2949	HVAEP1_G018936
chr-10	41168082	41170006	8619	42088	.	OverlapEnd	3565	HVAEP1_G018942
chr-10	41170814	41171392	8620	15572	.	Downstream	5624	HVAEP1_G018942
chr-10	41359256	41360886	8639	36831	.	PeakInsideFeature	7533	HVAEP1_G018949
chr-10	41365265	41366240	8641	33506	.	PeakInsideFeature	1852	HVAEP1_G018949
chr-10	41368614	41369531	8642	13956	.	PeakInsideFeature	785	HVAEP1_G018949
chr-10	41538995	41539362	8658	28366	.	Downstream	1533	HVAEP1_G018956
chr-10	41576050	41577880	8663	23802	.	OverlapStart	651	HVAEP1_G018957
chr-10	41619597	41620744	8673	24419	.	Upstream	2317	HVAEP1_G018959
chr-10	41625345	41626747	8675	36606	.	Upstream	3278	HVAEP1_G018960
chr-10	41644959	41646391	8683	49715	.	Downstream	6397	HVAEP1_G018963
chr-10	41647348	41647737	8685	19289	.	Downstream	4530	HVAEP1_G018963
chr-10	41656828	41657836	8690	53193	.	PeakInsideFeature	2964	HVAEP1_G018964
chr-10	41665873	41666680	8694	78330	.	Downstream	4151	HVAEP1_G018965
chr-10	41707094	41708102	8698	16834	.	Upstream	3867	HVAEP1_G018966
chr-10	41738748	41739013	8701	28813	.	Upstream	4542	HVAEP1_G018967
chr-10	41919338	41920352	8724	16475	.	Upstream	6924	HVAEP1_G018973
chr-10	41937811	41939357	8729	33154	.	FeatureInsidePeak	579	HVAEP1_G018974
chr-10	41997711	41998887	8734	29272	.	Upstream	1590	HVAEP1_G018978
chr-10	42454278	42456139	8750	18183	.	Downstream	23362	HVAEP1_G018991
chr-10	42584876	42586011	8755	18135	.	Downstream	38495	HVAEP1_G018993
chr-10	42586196	42587002	8756	28675	.	Downstream	37339	HVAEP1_G018993
chr-10	43468656	43469706	8778	35850	.	OverlapStart	417	HVAEP1_G019020
chr-10	43482545	43484376	8781	44006	.	Upstream	13862	HVAEP1_G019020
chr-10	43484705	43485976	8782	104507	.	Upstream	15742	HVAEP1_G019020
chr-10	43774739	43776502	8798	20827	.	Downstream	23582	HVAEP1_G019035
chr-10	43776626	43777489	8799	23944	.	Downstream	25019	HVAEP1_G019035
chr-10	43893443	43895802	8806	34964	.	Upstream	11387	HVAEP1_G019039
chr-10	44010263	44011240	8810	23455	.	OverlapStart	317	HVAEP1_G019041
chr-10	44065883	44067223	8817	45090	.	OverlapStart	509	HVAEP1_G019043
chr-10	44106876	44107474	8824	30506	.	Upstream	9723	HVAEP1_G019044
chr-10	44113881	44114448	8828	24843	.	Upstream	2734	HVAEP1_G019044
chr-10	44142221	44142558	8833	22511	.	Downstream	24717	HVAEP1_G019044
chr-10	44152874	44155419	8838	70137	.	Upstream	13266	HVAEP1_G019045
chr-10	44158586	44160876	8842	59281	.	Upstream	7681	HVAEP1_G019045
chr-10	44280973	44282362	8850	23322	.	Upstream	22155	HVAEP1_G019049
chr-10	44489421	44491415	8869	51451	.	PeakInsideFeature	1596	HVAEP1_G019052
chr-10	44512038	44512932	8878	34926	.	OverlapStart	169	HVAEP1_G019053
chr-10	44521881	44526752	8883	141590	.	PeakInsideFeature	10968	HVAEP1_G019053
chr-10	44629702	44630920	8896	25056	.	Upstream	1208	HVAEP1_G019054
chr-10	44631255	44632985	8897	51632	.	OverlapStart	601	HVAEP1_G019054
chr-10	44674910	44675233	8901	25763	.	PeakInsideFeature	1112	HVAEP1_G019057
chr-10	45133607	45134375	8929	23033	.	Upstream	993	HVAEP1_G019065
chr-10	45148498	45149636	8933	35610	.	Upstream	2546	HVAEP1_G019065
chr-10	45152379	45152813	8935	13489	.	Upstream	5193	HVAEP1_G019066
chr-10	45351603	45352313	8947	24275	.	Upstream	10019	HVAEP1_G019070
chr-10	45467050	45468281	8952	23293	.	PeakInsideFeature	2314	HVAEP1_G019071
chr-10	45488743	45489462	8958	24330	.	Downstream	21292	HVAEP1_G019072
chr-10	45573486	45574214	8966	24562	.	PeakInsideFeature	3119	HVAEP1_G019076
chr-10	45576048	45577483	8968	43757	.	PeakInsideFeature	6034	HVAEP1_G019076
chr-10	45794381	45795344	8974	19727	.	OverlapStart	360	HVAEP1_G019081
chr-10	45796257	45796814	8975	46102	.	PeakInsideFeature	634	HVAEP1_G019080
chr-10	45798869	45800591	8978	82757	.	Upstream	2561	HVAEP1_G019080
chr-10	45806493	45807347	8980	25540	.	Upstream	9751	HVAEP1_G019080
chr-10	45902598	45903457	8988	13150	.	Downstream	27564	HVAEP1_G019085
chr-10	45921363	45923069	8989	18044	.	Upstream	21565	HVAEP1_G019087
chr-10	46188918	46190145	9008	19608	.	Upstream	15406	HVAEP1_G019095
chr-10	46267811	46269600	9013	20842	.	Upstream	5791	HVAEP1_G019099
chr-10	46441085	46441724	9017	14619	.	OverlapStart	122	HVAEP1_G019105
chr-10	46540687	46542626	9024	47380	.	OverlapEnd	16806	HVAEP1_G019108
chr-10	46543699	46544048	9025	18845	.	Downstream	19023	HVAEP1_G019108
chr-10	46544505	46546619	9027	40985	.	Downstream	20712	HVAEP1_G019108
chr-10	46740521	46741255	9034	24945	.	Upstream	1214	HVAEP1_G019112
chr-10	46850516	46851625	9045	27804	.	Upstream	4526	HVAEP1_G019114
chr-10	46853362	46854041	9047	21511	.	Upstream	7157	HVAEP1_G019114
chr-10	46876260	46877626	9049	24885	.	Downstream	14215	HVAEP1_G019115
chr-10	46886160	46888305	9052	46748	.	Downstream	3926	HVAEP1_G019115
chr-10	47043546	47045095	9062	24864	.	Upstream	1056	HVAEP1_G019123
chr-10	47330693	47331119	9065	23641	.	Downstream	1251	HVAEP1_G019130
chr-10	47379109	47379628	9069	22145	.	PeakInsideFeature	17912	HVAEP1_G019131
chr-10	47569931	47570372	9078	22341	.	Upstream	21187	HVAEP1_G019135
chr-10	47973374	47973786	9098	20257	.	Upstream	5088	HVAEP1_G019140
chr-10	47977934	47978582	9103	22426	.	Upstream	410	HVAEP1_G019140
chr-10	48003262	48004516	9108	35771	.	Upstream	2680	HVAEP1_G019142
chr-10	48005795	48006858	9110	26986	.	OverlapStart	243	HVAEP1_G019142
chr-10	48074219	48075496	9113	26714	.	PeakInsideFeature	51731	HVAEP1_G019144
chr-10	48078110	48079506	9115	83277	.	PeakInsideFeature	55682	HVAEP1_G019144
chr-10	48120327	48121179	9117	43824	.	Upstream	24797	HVAEP1_G019144
chr-10	48457738	48459605	9126	31020	.	PeakInsideFeature	2736	HVAEP1_G019149
chr-10	48475051	48476151	9130	24741	.	PeakInsideFeature	19666	HVAEP1_G019149
chr-10	49388388	49389681	9155	34380	.	Downstream	15729	HVAEP1_G019174
chr-10	49412642	49413199	9158	17499	.	PeakInsideFeature	970	HVAEP1_G019176
chr-10	49416796	49418434	9161	32642	.	PeakInsideFeature	5665	HVAEP1_G019176
chr-10	49504919	49505510	9165	18226	.	Downstream	14290	HVAEP1_G019179
chr-10	49628696	49629720	9170	34838	.	Upstream	11124	HVAEP1_G019182
chr-10	49637511	49639396	9173	67456	.	Upstream	1879	HVAEP1_G019182
chr-10	49788934	49790009	9178	22448	.	Upstream	12394	HVAEP1_G019183
chr-10	49790833	49791924	9180	22995	.	Upstream	14301	HVAEP1_G019183
chr-10	49853820	49854832	9193	29878	.	Upstream	9158	HVAEP1_G019185
chr-10	49857673	49859364	9196	60242	.	Upstream	13350	HVAEP1_G019185
chr-10	49912093	49913295	9205	50805	.	OverlapEnd	723	HVAEP1_G019187
chr-10	49974485	49976012	9216	28310	.	Upstream	2909	HVAEP1_G019191
chr-10	50143094	50143998	9219	21791	.	Upstream	12487	HVAEP1_G019194
chr-10	50154947	50157402	9220	37426	.	OverlapStart	141	HVAEP1_G019194
chr-10	50158301	50158911	9221	22375	.	PeakInsideFeature	365	HVAEP1_G019194
chr-10	50288520	50289674	9226	42531	.	Downstream	5019	HVAEP1_G019203
chr-10	50415671	50416508	9227	23132	.	Upstream	18847	HVAEP1_G019208
chr-10	50882989	50884680	9234	51456	.	PeakInsideFeature	4342	HVAEP1_G019218
chr-10	50891965	50893709	9237	85900	.	PeakInsideFeature	13345	HVAEP1_G019218
chr-10	50902215	50904177	9240	42523	.	PeakInsideFeature	23704	HVAEP1_G019218
chr-10	50936479	50937841	9242	19765	.	PeakInsideFeature	57668	HVAEP1_G019218
chr-10	50951771	50953691	9245	42457	.	Downstream	46594	HVAEP1_G019219
chr-10	51079592	51081793	9257	53536	.	Upstream	6043	HVAEP1_G019222
chr-10	51087881	51091216	9259	26619	.	PeakInsideFeature	2813	HVAEP1_G019222
chr-10	51223711	51224348	9267	18419	.	Upstream	2688	HVAEP1_G019224
chr-10	51231117	51232007	9274	59679	.	Downstream	4845	HVAEP1_G019224
chr-10	51367012	51368180	9284	26248	.	Downstream	4018	HVAEP1_G019226
chr-10	51502562	51505093	9307	111758	.	PeakInsideFeature	1629	HVAEP1_G019231
chr-10	51543643	51544559	9315	20609	.	Upstream	38161	HVAEP1_G019231
chr-10	51594190	51598093	9321	102442	.	FeatureInsidePeak	645	HVAEP1_G019232
chr-10	51628676	51629310	9327	17163	.	OverlapStart	85	HVAEP1_G019234
chr-10	51633972	51635677	9330	66999	.	Upstream	5746	HVAEP1_G019234
chr-10	51637117	51638487	9332	16870	.	Upstream	8724	HVAEP1_G019234
chr-10	51653702	51654902	9335	16509	.	Downstream	1862	HVAEP1_G019235
chr-10	51700261	51701778	9341	43138	.	Upstream	15572	HVAEP1_G019238
chr-10	51705213	51705778	9342	43244	.	Upstream	11096	HVAEP1_G019238
chr-10	51706178	51708408	9343	38913	.	Upstream	9298	HVAEP1_G019238
chr-10	51815982	51817488	9354	23174	.	OverlapStart	733	HVAEP1_G019241
chr-10	51844797	51845137	9362	48712	.	Downstream	8213	HVAEP1_G019242
chr-10	52065280	52066630	9378	40327	.	Upstream	21860	HVAEP1_G019249
chr-10	52359215	52360698	9390	23969	.	Downstream	24985	HVAEP1_G019262
chr-10	52489460	52490630	9396	42101	.	Upstream	12508	HVAEP1_G019270
chr-10	52711648	52712386	9409	21298	.	PeakInsideFeature	11442	HVAEP1_G019277
chr-10	52726942	52729238	9414	120611	.	Upstream	4631	HVAEP1_G019277
chr-10	52729868	52731377	9415	87616	.	Upstream	7163	HVAEP1_G019277
chr-10	52738140	52740509	9420	94610	.	Downstream	10883	HVAEP1_G019278
chr-10	53207657	53208362	9448	23848	.	Upstream	3932	HVAEP1_G019300
chr-10	53316928	53317839	9457	30761	.	Upstream	9409	HVAEP1_G019300
chr-10	53320220	53322305	9458	97439	.	Upstream	5530	HVAEP1_G019300
chr-10	53540109	53540977	9468	20397	.	PeakInsideFeature	617	HVAEP1_G019313
chr-10	53741416	53744585	9479	41191	.	Upstream	26167	HVAEP1_G019322
chr-10	53748018	53749319	9480	48881	.	Upstream	31835	HVAEP1_G019322
chr-10	53753438	53754102	9483	19557	.	Upstream	36937	HVAEP1_G019322
chr-10	53809054	53810501	9486	41395	.	PeakInsideFeature	13888	HVAEP1_G019323
chr-10	53811763	53812302	9489	20304	.	PeakInsideFeature	11633	HVAEP1_G019323
chr-10	53839159	53839434	9493	15867	.	PeakInsideFeature	991	HVAEP1_G019326
chr-10	53970429	53970973	9496	20230	.	PeakInsideFeature	1276	HVAEP1_G019329
chr-10	54060725	54061454	9502	15385	.	Upstream	2151	HVAEP1_G019334
chr-10	54264587	54265566	9506	18005	.	Upstream	5830	HVAEP1_G019347
chr-10	54270084	54271087	9509	32356	.	OverlapStart	321	HVAEP1_G019347
chr-10	54271226	54272641	9510	32303	.	PeakInsideFeature	1027	HVAEP1_G019347
chr-10	54273071	54273864	9511	27155	.	Downstream	2561	HVAEP1_G019347
chr-10	54273988	54275292	9512	26823	.	Downstream	3734	HVAEP1_G019347
chr-10	54275405	54276439	9513	50376	.	Downstream	5016	HVAEP1_G019347
chr-10	54291290	54294871	9518	149337	.	Upstream	2036	HVAEP1_G019348
chr-10	54522863	54524812	9527	54799	.	Downstream	5951	HVAEP1_G019351
chr-11	904221	905829	9545	23867	.	Downstream	16652	HVAEP1_G019392
chr-11	1395280	1396679	9560	33648	.	OverlapStart	537	HVAEP1_G019412
chr-11	1472082	1473327	9567	26678	.	PeakInsideFeature	847	HVAEP1_G019415
chr-11	1495620	1496912	9572	18984	.	OverlapStart	424	HVAEP1_G019416
chr-11	1503669	1504170	9574	18077	.	Upstream	5014	HVAEP1_G019417
chr-11	1514067	1515061	9579	19627	.	Downstream	6796	HVAEP1_G019418
chr-11	1607108	1607687	9587	31890	.	Upstream	877	HVAEP1_G019426
chr-11	1608001	1610582	9588	122179	.	OverlapStart	1017	HVAEP1_G019426
chr-11	1625608	1626743	9592	26048	.	Downstream	1903	HVAEP1_G019427
chr-11	1681547	1683920	9597	46217	.	PeakInsideFeature	10867	HVAEP1_G019428
chr-11	1688233	1690158	9600	41648	.	PeakInsideFeature	4405	HVAEP1_G019428
chr-11	1692481	1693783	9602	24490	.	OverlapStart	468	HVAEP1_G019428
chr-11	1694441	1695261	9603	37999	.	Upstream	1251	HVAEP1_G019428
chr-11	1900285	1901302	9614	26479	.	Upstream	4147	HVAEP1_G019434
chr-11	2033518	2034670	9620	103271	.	Upstream	2101	HVAEP1_G019438
chr-11	2050315	2050936	9624	14097	.	Upstream	5065	HVAEP1_G019439
chr-11	2103829	2104633	9639	14071	.	Upstream	5122	HVAEP1_G019440
chr-11	2112492	2113078	9642	22082	.	Downstream	3432	HVAEP1_G019440
chr-11	2271657	2273158	9649	28052	.	Upstream	14772	HVAEP1_G019444
chr-11	2273268	2274823	9650	21883	.	Upstream	13134	HVAEP1_G019444
chr-11	2318550	2320451	9656	141466	.	PeakInsideFeature	1494	HVAEP1_G019445
chr-11	2421341	2421892	9658	21662	.	PeakInsideFeature	296	HVAEP1_G019447
chr-11	2428333	2429371	9660	16597	.	OverlapStart	214	HVAEP1_G019448
chr-11	2506471	2507394	9666	23335	.	Upstream	2606	HVAEP1_G019450
chr-11	2570456	2571050	9674	67413	.	Upstream	1565	HVAEP1_G019452
chr-11	2588385	2589494	9679	88220	.	Upstream	1639	HVAEP1_G019454
chr-11	2594411	2596120	9683	31782	.	Upstream	4675	HVAEP1_G019451
chr-11	2601978	2604613	9688	50717	.	Upstream	12705	HVAEP1_G019451
chr-11	2605333	2606303	9689	55475	.	Upstream	15228	HVAEP1_G019451
chr-11	2615671	2617246	9691	36890	.	Upstream	25868	HVAEP1_G019451
chr-11	2866103	2867115	9705	17549	.	Upstream	18926	HVAEP1_G019460
chr-11	3033534	3034651	9713	43455	.	PeakInsideFeature	9081	HVAEP1_G019463
chr-11	3035791	3036894	9714	42056	.	PeakInsideFeature	11331	HVAEP1_G019463
chr-11	3091899	3092394	9719	19394	.	PeakInsideFeature	1653	HVAEP1_G019465
chr-11	3103074	3106349	9722	91918	.	PeakInsideFeature	14218	HVAEP1_G019465
chr-11	3304553	3306572	9744	55152	.	PeakInsideFeature	6088	HVAEP1_G019472
chr-11	3343704	3345334	9750	44740	.	FeatureInsidePeak	196	HVAEP1_G019473
chr-11	3428900	3429713	9756	16097	.	PeakInsideFeature	41507	HVAEP1_G019475
chr-11	3439590	3443011	9759	52756	.	Upstream	38699	HVAEP1_G019476
chr-11	3443787	3444591	9760	15565	.	Upstream	35810	HVAEP1_G019476
chr-11	3500915	3502173	9771	28640	.	Downstream	21545	HVAEP1_G019476
chr-11	3503034	3507311	9773	170483	.	Downstream	25173	HVAEP1_G019476
chr-11	3581303	3582861	9774	50122	.	OverlapStart	148	HVAEP1_G019478
chr-11	3605009	3605395	9779	21942	.	PeakInsideFeature	23268	HVAEP1_G019478
chr-11	3650100	3650727	9782	35204	.	Upstream	4615	HVAEP1_G019479
chr-11	3652191	3653159	9784	26674	.	Upstream	2353	HVAEP1_G019479
chr-11	3683882	3684963	9786	30393	.	Downstream	26419	HVAEP1_G019479
chr-11	3686102	3688635	9788	143037	.	Downstream	29365	HVAEP1_G019479
chr-11	3722096	3727113	9794	69096	.	FeatureInsidePeak	105	HVAEP1_G019481
chr-11	3736758	3738042	9796	24257	.	Upstream	7500	HVAEP1_G019482
chr-11	4045477	4046789	9806	17501	.	Downstream	9534	HVAEP1_G019493
chr-11	4223874	4224494	9815	17725	.	PeakInsideFeature	2200	HVAEP1_G019502
chr-11	4224718	4226279	9816	29967	.	PeakInsideFeature	886	HVAEP1_G019502
chr-11	4226693	4229771	9817	93178	.	OverlapStart	397	HVAEP1_G019503
chr-11	4230427	4232034	9818	22082	.	PeakInsideFeature	2601	HVAEP1_G019503
chr-11	4236565	4237599	9820	84907	.	PeakInsideFeature	8453	HVAEP1_G019503
chr-11	4240479	4240928	9822	13429	.	PeakInsideFeature	12074	HVAEP1_G019503
chr-11	4304229	4304893	9828	14884	.	OverlapStart	235	HVAEP1_G019505
chr-11	4532780	4533610	9839	33076	.	Upstream	2442	HVAEP1_G019512
chr-11	4534969	4535856	9840	31270	.	Upstream	4659	HVAEP1_G019512
chr-11	5261473	5262017	9904	20078	.	Upstream	483	HVAEP1_G019536
chr-11	5371299	5371670	9914	15088	.	Upstream	4926	HVAEP1_G019539
chr-11	5578214	5578958	9926	14317	.	PeakInsideFeature	10623	HVAEP1_G019546
chr-11	5624287	5625714	9932	55599	.	Upstream	1357	HVAEP1_G019547
chr-11	5659026	5660555	9939	34657	.	OverlapEnd	1469	HVAEP1_G019548
chr-11	5661266	5661764	9940	26146	.	Upstream	256	HVAEP1_G019548
chr-11	5864245	5865180	9953	26461	.	Downstream	10716	HVAEP1_G019555
chr-11	5898178	5898567	9960	24568	.	PeakInsideFeature	1125	HVAEP1_G019556
chr-11	5939777	5943179	9970	35350	.	PeakInsideFeature	7698	HVAEP1_G019558
chr-11	6036480	6036887	9977	44067	.	Upstream	7592	HVAEP1_G019562
chr-11	6110946	6111540	9982	32151	.	Upstream	21460	HVAEP1_G019566
chr-11	6115211	6115713	9985	25831	.	Downstream	21222	HVAEP1_G019567
chr-11	6116114	6118183	9986	30893	.	Downstream	19536	HVAEP1_G019567
chr-11	6135954	6137252	9988	32020	.	OverlapStart	81	HVAEP1_G019567
chr-11	6137397	6139356	9989	65990	.	Upstream	1692	HVAEP1_G019567
chr-11	6141646	6142460	9991	20973	.	Upstream	5369	HVAEP1_G019567
chr-11	6241732	6242807	10000	35114	.	OverlapStart	224	HVAEP1_G019570
chr-11	6334288	6334725	10010	15966	.	Upstream	8700	HVAEP1_G019573
chr-11	6343897	6344365	10014	18695	.	Upstream	16111	HVAEP1_G019574
chr-11	6344862	6346189	10015	19701	.	Upstream	14717	HVAEP1_G019574
chr-11	6400098	6400799	10019	23301	.	PeakInsideFeature	3071	HVAEP1_G019576
chr-11	6416929	6417541	10029	15372	.	Upstream	655	HVAEP1_G019577
chr-11	6419492	6421559	10032	68949	.	PeakInsideFeature	2635	HVAEP1_G019577
chr-11	6444385	6445111	10035	14078	.	Upstream	909	HVAEP1_G019578
chr-11	6613885	6614746	10059	32686	.	Upstream	29003	HVAEP1_G019585
chr-11	6637289	6638070	10063	27899	.	Upstream	5639	HVAEP1_G019585
chr-11	6668796	6669608	10070	25195	.	OverlapEnd	800	HVAEP1_G019587
chr-11	6684553	6686097	10072	27687	.	Downstream	16923	HVAEP1_G019587
chr-11	6686577	6687017	10073	22723	.	Downstream	18395	HVAEP1_G019587
chr-11	6722932	6724121	10082	65339	.	PeakInsideFeature	1266	HVAEP1_G019589
chr-11	6939564	6940817	10089	23605	.	Upstream	1557	HVAEP1_G019596
chr-11	7064686	7066247	10099	29306	.	OverlapStart	568	HVAEP1_G019601
chr-11	7092289	7094174	10105	37602	.	FeatureInsidePeak	10	HVAEP1_G019602
chr-11	7401721	7402572	10123	15565	.	Downstream	3917	HVAEP1_G019612
chr-11	7511436	7512865	10130	20605	.	PeakInsideFeature	1024	HVAEP1_G019615
chr-11	7545412	7546706	10134	24368	.	Downstream	31656	HVAEP1_G019616
chr-11	7597504	7598885	10146	26384	.	OverlapStart	410	HVAEP1_G019617
chr-11	7620450	7621330	10150	12944	.	Upstream	13711	HVAEP1_G019618
chr-11	7622268	7622784	10151	20566	.	Upstream	15347	HVAEP1_G019618
chr-11	7726101	7726458	10154	27447	.	Upstream	12247	HVAEP1_G019622
chr-11	7788901	7789478	10164	15210	.	PeakInsideFeature	2893	HVAEP1_G019626
chr-11	7793259	7795607	10168	85266	.	PeakInsideFeature	8137	HVAEP1_G019626
chr-11	7800073	7800437	10174	30650	.	PeakInsideFeature	13959	HVAEP1_G019626
chr-11	7900603	7901231	10178	18183	.	Upstream	6439	HVAEP1_G019629
chr-11	7915319	7915955	10182	18782	.	Upstream	16075	HVAEP1_G019630
chr-11	7918092	7918640	10183	15033	.	Upstream	13346	HVAEP1_G019630
chr-11	7925925	7927074	10185	81412	.	Upstream	5213	HVAEP1_G019630
chr-11	8081230	8082049	10191	49158	.	Downstream	2876	HVAEP1_G019637
chr-11	8084308	8085558	10194	46916	.	Downstream	6170	HVAEP1_G019637
chr-11	8095390	8095918	10198	16765	.	Upstream	1394	HVAEP1_G019638
chr-11	8096341	8098791	10199	50373	.	Upstream	3306	HVAEP1_G019638
chr-11	8176870	8178642	10202	45864	.	Upstream	9694	HVAEP1_G019641
chr-11	8188328	8188808	10205	31685	.	PeakInsideFeature	1118	HVAEP1_G019641
chr-11	8190846	8191834	10207	17772	.	OverlapStart	225	HVAEP1_G019641
chr-11	8234917	8235944	10210	49875	.	PeakInsideFeature	7440	HVAEP1_G019642
chr-11	8250729	8251816	10216	17505	.	Upstream	15342	HVAEP1_G019643
chr-11	8284485	8286304	10223	40325	.	PeakInsideFeature	1020	HVAEP1_G019644
chr-11	8316416	8318102	10228	32072	.	Upstream	30845	HVAEP1_G019644
chr-11	8364053	8366262	10238	26482	.	PeakInsideFeature	23193	HVAEP1_G019645
chr-11	8394187	8396775	10245	54176	.	PeakInsideFeature	1639	HVAEP1_G019645
chr-11	8444599	8445742	10251	21243	.	Upstream	1071	HVAEP1_G019647
chr-11	8452418	8453056	10256	30934	.	Downstream	6496	HVAEP1_G019647
chr-11	8472621	8474205	10260	24274	.	Downstream	27172	HVAEP1_G019647
chr-11	8478168	8478640	10261	14569	.	Downstream	32163	HVAEP1_G019647
chr-11	8486980	8487498	10264	21255	.	Upstream	40415	HVAEP1_G019648
chr-11	8487783	8489206	10265	18037	.	Upstream	39160	HVAEP1_G019648
chr-11	8518724	8519209	10273	19522	.	Upstream	8688	HVAEP1_G019648
chr-11	8527437	8529637	10277	48773	.	OverlapStart	883	HVAEP1_G019648
chr-11	8530397	8532414	10278	59577	.	OverlapStart	170	HVAEP1_G019648
chr-11	8535721	8536784	10281	21169	.	PeakInsideFeature	5017	HVAEP1_G019648
chr-11	8537304	8539742	10282	41547	.	PeakInsideFeature	7288	HVAEP1_G019648
chr-11	8585515	8586865	10297	23184	.	Upstream	17200	HVAEP1_G019649
chr-11	8587924	8588500	10298	14303	.	Upstream	15178	HVAEP1_G019649
chr-11	8824791	8826975	10321	44777	.	OverlapStart	184	HVAEP1_G019654
chr-11	8871658	8873365	10324	37323	.	OverlapStart	794	HVAEP1_G019659
chr-11	8968276	8970656	10330	40330	.	OverlapStart	243	HVAEP1_G019660
chr-11	8990503	8991853	10337	42567	.	Upstream	2627	HVAEP1_G019661
chr-11	8991939	8993933	10338	49541	.	Upstream	4114	HVAEP1_G019662
chr-11	9024780	9025503	10342	18197	.	Upstream	913	HVAEP1_G019663
chr-11	9036253	9038114	10343	48087	.	Downstream	5615	HVAEP1_G019664
chr-11	9047662	9048787	10350	48356	.	PeakInsideFeature	5348	HVAEP1_G019665
chr-11	9048989	9050051	10351	24100	.	Upstream	5417	HVAEP1_G019665
chr-11	9053316	9054475	10353	18451	.	Upstream	1042	HVAEP1_G019665
chr-11	9055325	9055989	10355	28064	.	PeakInsideFeature	720	HVAEP1_G019665
chr-11	9056882	9058587	10357	50329	.	OverlapStart	417	HVAEP1_G019665
chr-11	9107083	9108232	10365	19571	.	PeakInsideFeature	2055	HVAEP1_G019666
chr-11	9298279	9298877	10391	18150	.	Upstream	29528	HVAEP1_G019673
chr-11	9323939	9325141	10393	49722	.	Upstream	3566	HVAEP1_G019673
chr-11	9325524	9326554	10394	26466	.	Upstream	2067	HVAEP1_G019673
chr-11	9330209	9331761	10398	36530	.	PeakInsideFeature	2879	HVAEP1_G019673
chr-11	9343911	9344414	10399	27189	.	PeakInsideFeature	16056	HVAEP1_G019673
chr-11	9370849	9371490	10407	28090	.	PeakInsideFeature	5136	HVAEP1_G019673
chr-11	9678362	9680080	10421	72317	.	OverlapEnd	941	HVAEP1_G019680
chr-11	9691082	9693209	10423	35026	.	Downstream	9113	HVAEP1_G019681
chr-11	9693841	9695026	10424	53273	.	Downstream	6825	HVAEP1_G019681
chr-11	9777102	9778845	10430	73082	.	FeatureInsidePeak	331	HVAEP1_G019684
chr-11	9787267	9789182	10432	42636	.	OverlapStart	779	HVAEP1_G019685
chr-11	9790430	9792168	10434	59705	.	OverlapStart	84	HVAEP1_G019686
chr-11	9795766	9796687	10437	27088	.	Upstream	4843	HVAEP1_G019686
chr-11	9803622	9805337	10440	48380	.	Upstream	13096	HVAEP1_G019686
chr-11	9815494	9816131	10442	31416	.	Upstream	13901	HVAEP1_G019688
chr-11	9828940	9830064	10444	29967	.	OverlapStart	211	HVAEP1_G019688
chr-11	9831159	9831744	10446	41101	.	PeakInsideFeature	1306	HVAEP1_G019688
chr-11	9866013	9868586	10448	46950	.	Upstream	10105	HVAEP1_G019691
chr-11	9998697	10000843	10454	42741	.	Upstream	1282	HVAEP1_G019693
chr-11	10043417	10045083	10462	114093	.	Upstream	1463	HVAEP1_G019695
chr-11	10045183	10045493	10463	18860	.	Upstream	2551	HVAEP1_G019695
chr-11	10060779	10061224	10465	22641	.	Downstream	3621	HVAEP1_G019696
chr-11	10070159	10070714	10468	28825	.	Downstream	13056	HVAEP1_G019696
chr-11	10292674	10293179	10479	20242	.	Upstream	1189	HVAEP1_G019706
chr-11	10471971	10472496	10487	93441	.	PeakInsideFeature	20424	HVAEP1_G019713
chr-11	10491834	10492298	10489	40425	.	PeakInsideFeature	591	HVAEP1_G019713
chr-11	10508659	10510133	10500	21416	.	Upstream	16739	HVAEP1_G019713
chr-11	10565496	10567875	10503	34016	.	OverlapStart	844	HVAEP1_G019714
chr-11	10614853	10615906	10507	26585	.	PeakInsideFeature	1011	HVAEP1_G019717
chr-11	10624488	10626433	10512	80519	.	Downstream	11092	HVAEP1_G019717
chr-11	10626636	10628202	10513	108753	.	Downstream	13051	HVAEP1_G019717
chr-11	10717495	10719036	10515	57627	.	Upstream	14617	HVAEP1_G019719
chr-11	10790025	10790475	10527	19121	.	Downstream	42035	HVAEP1_G019719
chr-11	10839378	10840879	10535	37860	.	Upstream	4346	HVAEP1_G019720
chr-11	10861334	10862419	10542	37420	.	Upstream	1294	HVAEP1_G019721
chr-11	10883351	10884013	10548	19342	.	Downstream	19166	HVAEP1_G019721
chr-11	11027753	11029995	10556	41325	.	Downstream	13778	HVAEP1_G019725
chr-11	11045775	11046790	10563	27153	.	OverlapStart	478	HVAEP1_G019725
chr-11	11059621	11060392	10565	16042	.	Downstream	6862	HVAEP1_G019726
chr-11	11149596	11150790	10568	48076	.	Upstream	1014	HVAEP1_G019727
chr-11	11220414	11220964	10579	16771	.	PeakInsideFeature	2444	HVAEP1_G019729
chr-11	11258435	11260312	10586	21966	.	Downstream	5930	HVAEP1_G019731
chr-11	11324652	11326290	10593	23867	.	Downstream	10728	HVAEP1_G019735
chr-11	11328299	11330345	10595	49904	.	Downstream	6877	HVAEP1_G019735
chr-11	11331304	11332496	10597	31943	.	Downstream	4299	HVAEP1_G019735
chr-11	11421088	11422233	10606	33117	.	PeakInsideFeature	628	HVAEP1_G019737
chr-11	11424265	11426025	10608	30941	.	Upstream	2857	HVAEP1_G019737
chr-11	11510918	11512169	10616	44298	.	Upstream	3046	HVAEP1_G019741
chr-11	11513777	11514202	10619	18691	.	Upstream	600	HVAEP1_G019741
chr-11	11514535	11514970	10620	17563	.	OverlapStart	163	HVAEP1_G019741
chr-11	11524236	11524967	10621	19289	.	Upstream	8185	HVAEP1_G019742
chr-11	11527020	11527452	10623	10927	.	Upstream	5550	HVAEP1_G019742
chr-11	11540682	11542913	10625	41548	.	PeakInsideFeature	2522	HVAEP1_G019743
chr-11	11742570	11744286	10638	43693	.	Upstream	4133	HVAEP1_G019750
chr-11	11746364	11747335	10639	31488	.	Upstream	7554	HVAEP1_G019750
chr-11	11871445	11873212	10645	25574	.	PeakInsideFeature	18400	HVAEP1_G019756
chr-11	11936307	11937551	10647	30448	.	OverlapEnd	1595	HVAEP1_G019757
chr-11	11942719	11944773	10648	38831	.	Upstream	5222	HVAEP1_G019757
chr-11	12103348	12104261	10658	15586	.	Upstream	6649	HVAEP1_G019760
chr-11	12111043	12111523	10663	23880	.	OverlapStart	149	HVAEP1_G019760
chr-11	12113353	12114648	10665	27306	.	PeakInsideFeature	1371	HVAEP1_G019760
chr-11	12119410	12120628	10671	21614	.	PeakInsideFeature	7390	HVAEP1_G019760
chr-11	12122073	12125562	10672	91096	.	Downstream	11188	HVAEP1_G019760
chr-11	12125859	12127266	10673	17468	.	Downstream	13933	HVAEP1_G019760
chr-11	12177736	12179133	10675	29035	.	Upstream	14607	HVAEP1_G019763
chr-11	12207208	12208752	10678	59987	.	OverlapStart	134	HVAEP1_G019764
chr-11	12209115	12210238	10679	63567	.	Upstream	1379	HVAEP1_G019765
chr-11	12210849	12211274	10680	22587	.	OverlapStart	6	HVAEP1_G019765
chr-11	12217987	12219594	10687	24567	.	OverlapStart	629	HVAEP1_G019765
chr-11	12232248	12233902	10689	25207	.	PeakInsideFeature	14914	HVAEP1_G019765
chr-11	12246959	12248189	10693	17954	.	Upstream	6734	HVAEP1_G019766
chr-11	12253178	12254555	10695	15359	.	OverlapStart	442	HVAEP1_G019766
chr-11	12284312	12285199	10698	18550	.	Upstream	7644	HVAEP1_G019768
chr-11	12286117	12286399	10699	20043	.	Upstream	9147	HVAEP1_G019768
chr-11	12294753	12296147	10702	25873	.	Upstream	6298	HVAEP1_G019769
chr-11	12444662	12446578	10711	26171	.	Upstream	3819	HVAEP1_G019775
chr-11	12473655	12475108	10715	53072	.	Upstream	32580	HVAEP1_G019775
chr-11	12489507	12490362	10720	18451	.	Upstream	48133	HVAEP1_G019775
chr-11	12500390	12502635	10722	43629	.	Downstream	58036	HVAEP1_G019776
chr-11	12535161	12537266	10724	72806	.	PeakInsideFeature	23335	HVAEP1_G019776
chr-11	12537766	12538618	10725	20589	.	PeakInsideFeature	21356	HVAEP1_G019776
chr-11	12574487	12575438	10728	21191	.	Downstream	10866	HVAEP1_G019777
chr-11	12595737	12597377	10733	29364	.	Upstream	2493	HVAEP1_G019778
chr-11	12605474	12606543	10736	34403	.	Upstream	11944	HVAEP1_G019778
chr-11	12918880	12919931	10756	25511	.	PeakInsideFeature	747	HVAEP1_G019788
chr-11	12958412	12961274	10758	188425	.	Upstream	1685	HVAEP1_G019790
chr-11	12996998	12997511	10761	15987	.	PeakInsideFeature	1493	HVAEP1_G019795
chr-11	13001975	13002770	10764	17834	.	Upstream	1224	HVAEP1_G019796
chr-11	13003610	13004785	10765	126089	.	OverlapStart	542	HVAEP1_G019796
chr-11	13387568	13388717	10776	30909	.	Upstream	6118	HVAEP1_G019807
chr-11	13451020	13451919	10790	34449	.	PeakInsideFeature	11322	HVAEP1_G019809
chr-11	13607771	13608548	10805	14418	.	Upstream	9328	HVAEP1_G019812
chr-11	13686872	13687403	10822	30277	.	Upstream	466	HVAEP1_G019818
chr-11	13694805	13695326	10827	29755	.	Upstream	8394	HVAEP1_G019818
chr-11	13702422	13703285	10830	20112	.	Downstream	6789	HVAEP1_G019819
chr-11	13794662	13795430	10838	21047	.	Downstream	12356	HVAEP1_G019823
chr-11	13799229	13803024	10841	70163	.	Downstream	6276	HVAEP1_G019823
chr-11	13803369	13804078	10842	16119	.	Downstream	3679	HVAEP1_G019823
chr-11	13804218	13805920	10843	56351	.	OverlapEnd	2333	HVAEP1_G019823
chr-11	13810654	13811469	10847	19463	.	Upstream	670	HVAEP1_G019823
chr-11	13811829	13812758	10848	22183	.	Upstream	1902	HVAEP1_G019823
chr-11	13841063	13843875	10854	142679	.	Upstream	5339	HVAEP1_G019825
chr-11	13849929	13851566	10857	54567	.	Upstream	13617	HVAEP1_G019825
chr-11	13947590	13948978	10858	46763	.	Upstream	4925	HVAEP1_G019826
chr-11	13955028	13956916	10862	72413	.	PeakInsideFeature	2012	HVAEP1_G019827
chr-11	13957011	13959340	10863	140675	.	OverlapStart	191	HVAEP1_G019827
chr-11	13960231	13961433	10864	47173	.	PeakInsideFeature	1426	HVAEP1_G019827
chr-11	13961939	13964556	10865	95658	.	OverlapStart	989	HVAEP1_G019827
chr-11	13966077	13967151	10866	9736	.	Upstream	2023	HVAEP1_G019828
chr-11	13967236	13968142	10867	18196	.	Upstream	948	HVAEP1_G019828
chr-11	13979829	13980697	10870	17054	.	Downstream	5889	HVAEP1_G019831
chr-11	13981354	13981934	10871	12717	.	Downstream	7041	HVAEP1_G019832
chr-11	14033571	14035697	10880	58584	.	OverlapStart	707	HVAEP1_G019836
chr-11	14062621	14063253	10884	28367	.	OverlapStart	35	HVAEP1_G019837
chr-11	14148346	14149930	10889	40658	.	PeakInsideFeature	28370	HVAEP1_G019840
chr-11	14151346	14151731	10890	12954	.	PeakInsideFeature	25970	HVAEP1_G019840
chr-11	14151815	14152206	10891	8011	.	PeakInsideFeature	25498	HVAEP1_G019840
chr-11	14181586	14183663	10896	30471	.	Upstream	5116	HVAEP1_G019840
chr-11	14371264	14371836	10906	18493	.	Downstream	29214	HVAEP1_G019843
chr-11	14474560	14475466	10912	90194	.	Upstream	6381	HVAEP1_G019848
chr-11	14480024	14480508	10916	23947	.	Upstream	1128	HVAEP1_G019848
chr-11	14567105	14568214	10930	151600	.	Downstream	42605	HVAEP1_G019849
chr-11	14568535	14572542	10931	70407	.	Downstream	45484	HVAEP1_G019849
chr-11	14572638	14573735	10932	41216	.	Downstream	48132	HVAEP1_G019849
chr-11	14573867	14574369	10933	33629	.	Downstream	49064	HVAEP1_G019849
chr-11	14578562	14580915	10934	89761	.	Downstream	54684	HVAEP1_G019849
chr-11	14581839	14584228	10935	56766	.	PeakInsideFeature	53637	HVAEP1_G019850
chr-11	14633799	14636124	10938	45563	.	PeakInsideFeature	1709	HVAEP1_G019850
chr-11	14654432	14656202	10946	32439	.	Upstream	1946	HVAEP1_G019851
chr-11	14706115	14707290	10950	23707	.	PeakInsideFeature	1593	HVAEP1_G019852
chr-11	14820637	14821764	10958	20617	.	Downstream	1631	HVAEP1_G019855
chr-11	14880907	14881432	10962	15817	.	Upstream	11851	HVAEP1_G019856
chr-11	14975428	14976124	10969	27490	.	Upstream	19975	HVAEP1_G019861
chr-11	14979080	14979950	10970	31497	.	Upstream	16236	HVAEP1_G019861
chr-11	14980297	14981911	10971	38610	.	Upstream	14647	HVAEP1_G019861
chr-11	14988142	14989968	10973	65269	.	Upstream	6696	HVAEP1_G019861
chr-11	15119130	15120480	10984	57089	.	Downstream	8086	HVAEP1_G019867
chr-11	15292705	15293701	11000	32771	.	Upstream	34702	HVAEP1_G019872
chr-11	15477889	15479294	11019	65860	.	Downstream	11338	HVAEP1_G019875
chr-11	15505496	15506021	11022	35532	.	Downstream	10667	HVAEP1_G019876
chr-11	15582517	15583085	11033	19841	.	Upstream	6542	HVAEP1_G019878
chr-11	15665460	15666523	11041	32899	.	Downstream	3511	HVAEP1_G019881
chr-11	15709388	15710644	11043	16810	.	PeakInsideFeature	945	HVAEP1_G019882
chr-11	15711849	15712716	11044	32729	.	Upstream	650	HVAEP1_G019883
chr-11	15777726	15779662	11045	75071	.	Upstream	11069	HVAEP1_G019884
chr-11	15781006	15782821	11046	41085	.	Upstream	7850	HVAEP1_G019884
chr-11	15906386	15907004	11056	30064	.	PeakInsideFeature	4481	HVAEP1_G019887
chr-11	15945357	15948115	11065	55301	.	Upstream	1503	HVAEP1_G019888
chr-11	16192496	16194090	11085	35418	.	Upstream	11113	HVAEP1_G019897
chr-11	16416211	16417885	11094	22402	.	Downstream	3432	HVAEP1_G019909
chr-11	16985181	16986721	11141	38082	.	PeakInsideFeature	1243	HVAEP1_G019927
chr-11	17019443	17020592	11148	32911	.	PeakInsideFeature	3714	HVAEP1_G019928
chr-11	17023230	17023874	11149	17526	.	OverlapStart	179	HVAEP1_G019928
chr-11	17024114	17025140	11150	23018	.	Upstream	896	HVAEP1_G019928
chr-11	17025957	17028020	11152	31046	.	Upstream	3257	HVAEP1_G019928
chr-11	17158246	17159357	11167	22181	.	Upstream	2972	HVAEP1_G019934
chr-11	17290140	17291731	11177	74660	.	Upstream	3764	HVAEP1_G019935
chr-11	17340474	17340817	11189	25904	.	Upstream	45908	HVAEP1_G019935
chr-11	17462462	17462976	11196	29540	.	Upstream	1119	HVAEP1_G019938
chr-11	17466273	17466824	11197	15178	.	Upstream	4948	HVAEP1_G019938
chr-11	17468188	17469504	11198	17301	.	Upstream	7246	HVAEP1_G019938
chr-11	17520888	17522374	11200	20898	.	Upstream	4947	HVAEP1_G019941
chr-11	17895860	17896482	11207	37427	.	Upstream	5667	HVAEP1_G019948
chr-11	18130360	18131962	11212	39660	.	PeakInsideFeature	4381	HVAEP1_G019954
chr-11	18161727	18163683	11218	47642	.	Upstream	27163	HVAEP1_G019954
chr-11	18461020	18463303	11232	34056	.	PeakInsideFeature	1247	HVAEP1_G019962
chr-11	18508064	18509068	11247	28414	.	OverlapStart	81	HVAEP1_G019964
chr-11	18512911	18515816	11249	90237	.	Upstream	3954	HVAEP1_G019964
chr-11	18573532	18574955	11258	28505	.	OverlapStart	495	HVAEP1_G019967
chr-11	18575961	18577129	11259	41672	.	PeakInsideFeature	2797	HVAEP1_G019967
chr-11	18578274	18578752	11260	14534	.	Upstream	2572	HVAEP1_G019968
chr-11	18589491	18590011	11265	20600	.	Upstream	4011	HVAEP1_G019969
chr-11	18590811	18591861	11266	54223	.	Upstream	2426	HVAEP1_G019969
chr-11	18592497	18593579	11267	16526	.	Upstream	724	HVAEP1_G019969
chr-11	18637925	18639052	11272	34803	.	FeatureInsidePeak	232	HVAEP1_G019971
chr-11	18639426	18640678	11273	22494	.	Upstream	1332	HVAEP1_G019971
chr-11	18698547	18699244	11277	27039	.	Upstream	3120	HVAEP1_G019974
[truncated: 10,808 more rows]

## Sheet: H3K4me3 Peaks
Chromosome	Start	Stop	Peak ID	Peak Score	Strand	Position Relative to Gene	Distance to TSS	Nearest Gene
chr-1	2327706	2330040	2	191240	.	Upstream	44426	HVAEP1_G000061
chr-1	20079530	20081319	10	88496	.	Upstream	2867	HVAEP1_G000553
chr-1	23504228	23504932	14	211166	.	OverlapStart	7	HVAEP1_G000642
chr-1	23710943	23713001	15	157468	.	Downstream	3710	HVAEP1_G000649
chr-1	24199175	24200086	16	124259	.	Downstream	50010	HVAEP1_G000668
chr-1	27641040	27641750	21	107211	.	Upstream	4708	HVAEP1_G000792
chr-1	28012523	28013323	22	92047	.	Upstream	22053	HVAEP1_G000805
chr-1	29395669	29396571	27	146668	.	PeakInsideFeature	3282	HVAEP1_G000863
chr-1	29557423	29558449	29	412211	.	Upstream	1567	HVAEP1_G000868
chr-1	30001168	30001777	31	106556	.	Upstream	1360	HVAEP1_G000892
chr-1	30682518	30683499	32	127811	.	Upstream	1504	HVAEP1_G000912
chr-1	30779717	30780457	35	92138	.	Upstream	4286	HVAEP1_G000914
chr-1	31223593	31225250	37	93117	.	Downstream	6357	HVAEP1_G000925
chr-1	31290119	31290784	39	160204	.	OverlapStart	26	HVAEP1_G000932
chr-1	31737429	31739383	40	381359	.	OverlapStart	416	HVAEP1_G000956
chr-1	32158250	32159245	42	101165	.	Downstream	25368	HVAEP1_G000985
chr-1	32225650	32226792	43	84296	.	OverlapStart	3	HVAEP1_G000988
chr-1	32604320	32606326	44	192125	.	FeatureInsidePeak	350	HVAEP1_G001001
chr-1	33305417	33307016	47	177827	.	OverlapStart	505	HVAEP1_G001038
chr-1	33681612	33685340	49	228995	.	Downstream	11547	HVAEP1_G001050
chr-1	33884683	33887130	50	165404	.	FeatureInsidePeak	687	HVAEP1_G001062
chr-1	33955153	33956119	51	120129	.	OverlapStart	39	HVAEP1_G001065
chr-1	34136378	34136964	53	192737	.	OverlapStart	227	HVAEP1_G001068
chr-1	34308003	34309282	55	210942	.	FeatureInsidePeak	28	HVAEP1_G001078
chr-1	34371393	34372782	56	231156	.	Upstream	1106	HVAEP1_G001081
chr-1	35906461	35907184	60	173004	.	Upstream	5206	HVAEP1_G001110
chr-1	36664512	36666216	65	142249	.	OverlapStart	59	HVAEP1_G001132
chr-1	36744401	36746899	66	214921	.	OverlapEnd	1264	HVAEP1_G001135
chr-1	36939665	36941020	67	137976	.	Downstream	14688	HVAEP1_G001143
chr-1	37125891	37127721	68	100353	.	Downstream	1691	HVAEP1_G001148
chr-1	38260033	38261991	69	184320	.	OverlapStart	912	HVAEP1_G001193
chr-1	38354642	38356337	71	115686	.	FeatureInsidePeak	75	HVAEP1_G001199
chr-1	38728199	38729620	73	370272	.	Upstream	18310	HVAEP1_G001206
chr-1	38819623	38821990	75	146350	.	Upstream	14942	HVAEP1_G001209
chr-1	39022109	39023607	77	138172	.	OverlapStart	609	HVAEP1_G001216
chr-1	39741211	39743201	78	103842	.	PeakInsideFeature	56326	HVAEP1_G001232
chr-1	40795252	40796297	80	111788	.	OverlapStart	265	HVAEP1_G001262
chr-1	40946157	40947321	81	95937	.	OverlapStart	441	HVAEP1_G001266
chr-1	41129155	41130688	83	210053	.	Downstream	2529	HVAEP1_G001275
chr-1	41543474	41544945	84	99150	.	Upstream	4918	HVAEP1_G001289
chr-1	43086397	43088130	87	198152	.	OverlapStart	115	HVAEP1_G001331
chr-1	43875663	43877770	90	129491	.	OverlapStart	947	HVAEP1_G001357
chr-1	43915833	43917211	91	161214	.	OverlapStart	581	HVAEP1_G001359
chr-1	43952367	43954222	92	574397	.	Downstream	10249	HVAEP1_G001361
chr-1	43999655	44001925	93	209127	.	OverlapStart	734	HVAEP1_G001363
chr-1	44930286	44931616	96	269728	.	OverlapStart	398	HVAEP1_G001395
chr-1	45133573	45134906	97	222962	.	OverlapStart	594	HVAEP1_G001402
chr-1	45253006	45255286	100	177917	.	OverlapStart	716	HVAEP1_G001406
chr-1	46052027	46054457	104	110199	.	OverlapStart	46	HVAEP1_G001428
chr-1	46622623	46624315	107	207923	.	Upstream	3383	HVAEP1_G001449
chr-1	46928070	46929843	110	196477	.	Upstream	5450	HVAEP1_G001459
chr-1	47508586	47510664	111	158257	.	Upstream	4150	HVAEP1_G001473
chr-1	48452677	48455678	113	95109	.	Downstream	29690	HVAEP1_G001490
chr-1	48482669	48487693	114	328691	.	OverlapStart	1314	HVAEP1_G001490
chr-1	48715909	48716937	115	117475	.	Upstream	2863	HVAEP1_G001500
chr-1	49359884	49361804	119	202394	.	OverlapStart	337	HVAEP1_G001519
chr-1	49679069	49680636	120	150087	.	OverlapStart	180	HVAEP1_G001529
chr-1	49936603	49938701	123	125427	.	Downstream	9374	HVAEP1_G001541
chr-1	50172028	50172852	124	97516	.	Upstream	1106	HVAEP1_G001550
chr-1	51508228	51509779	129	122046	.	OverlapStart	139	HVAEP1_G001597
chr-1	52230376	52232536	133	187238	.	PeakInsideFeature	3256	HVAEP1_G001614
chr-1	53847196	53848197	135	96897	.	OverlapStart	305	HVAEP1_G001679
chr-1	53949112	53949815	136	216195	.	FeatureInsidePeak	201	HVAEP1_G001684
chr-1	54596615	54598960	138	119325	.	Upstream	28561	HVAEP1_G001705
chr-1	54704975	54706925	139	138734	.	Upstream	5658	HVAEP1_G001710
chr-1	55410880	55412207	141	158760	.	Downstream	12442	HVAEP1_G001730
chr-1	55701548	55703206	143	107978	.	OverlapStart	713	HVAEP1_G001739
chr-1	56781625	56782963	150	99063	.	OverlapStart	488	HVAEP1_G001788
chr-1	56997479	56999035	151	364540	.	OverlapStart	1	HVAEP1_G001794
chr-1	57597029	57598582	152	115058	.	OverlapStart	459	HVAEP1_G001810
chr-1	57681386	57682278	154	129910	.	OverlapStart	118	HVAEP1_G001813
chr-1	58016481	58017419	156	258168	.	OverlapStart	126	HVAEP1_G001826
chr-1	58428658	58431657	157	243399	.	Upstream	3388	HVAEP1_G001845
chr-1	58931056	58932496	159	112757	.	OverlapStart	487	HVAEP1_G001872
chr-1	59090191	59090749	160	96550	.	OverlapStart	171	HVAEP1_G001875
chr-1	59108024	59109300	161	174698	.	Upstream	3274	HVAEP1_G001877
chr-1	59496374	59497143	163	189917	.	OverlapStart	337	HVAEP1_G001886
chr-1	59950684	59953020	164	209210	.	OverlapStart	1087	HVAEP1_G001906
chr-1	60113808	60117046	165	141012	.	FeatureInsidePeak	970	HVAEP1_G001922
chr-1	60386869	60388021	166	112365	.	PeakInsideFeature	713	HVAEP1_G001931
chr-1	60505989	60507450	167	222507	.	FeatureInsidePeak	212	HVAEP1_G001955
chr-1	60662279	60664332	168	192835	.	FeatureInsidePeak	872	HVAEP1_G001961
chr-1	61097805	61098414	169	111499	.	Downstream	26980	HVAEP1_G001976
chr-1	61720043	61721175	171	122629	.	Upstream	740	HVAEP1_G001996
chr-1	61912450	61913799	172	210922	.	PeakInsideFeature	3559	HVAEP1_G001998
chr-1	62410808	62411381	173	92599	.	Upstream	20486	HVAEP1_G002007
chr-1	62975267	62977096	177	140921	.	OverlapStart	327	HVAEP1_G002019
chr-1	64213922	64215033	183	120017	.	Upstream	23773	HVAEP1_G002056
chr-1	64356611	64360112	184	328928	.	Upstream	6660	HVAEP1_G002060
chr-1	64372596	64374578	185	149829	.	Upstream	3535	HVAEP1_G002061
chr-1	66520167	66522047	188	122568	.	OverlapStart	691	HVAEP1_G002133
chr-1	66723977	66724841	189	238977	.	Upstream	3612	HVAEP1_G002141
chr-1	67420042	67421189	190	175056	.	OverlapStart	363	HVAEP1_G002167
chr-1	68244707	68246195	192	219242	.	OverlapStart	227	HVAEP1_G002183
chr-1	68528987	68530829	193	236960	.	Upstream	1477	HVAEP1_G002206
chr-1	69182682	69183873	195	141422	.	OverlapStart	92	HVAEP1_G002243
chr-1	70151144	70152484	196	107623	.	Downstream	35034	HVAEP1_G002266
chr-1	70574561	70575496	200	112590	.	Upstream	514	HVAEP1_G002279
chr-1	70628620	70629528	201	157391	.	PeakInsideFeature	39823	HVAEP1_G002280
chr-1	70709553	70710903	202	111753	.	Upstream	5302	HVAEP1_G002284
chr-1	71744771	71746321	204	137445	.	PeakInsideFeature	27912	HVAEP1_G002321
chr-1	72117484	72119469	205	280578	.	PeakInsideFeature	1187	HVAEP1_G002328
chr-1	72524064	72526400	207	202146	.	OverlapStart	5	HVAEP1_G002339
chr-1	72940445	72942303	208	177204	.	PeakInsideFeature	1130	HVAEP1_G002382
chr-1	73762322	73763509	212	312079	.	OverlapStart	445	HVAEP1_G002413
chr-1	73921926	73923167	214	97934	.	OverlapStart	19	HVAEP1_G002416
chr-1	73941089	73942621	215	184959	.	OverlapStart	694	HVAEP1_G002418
chr-1	74010569	74015275	216	163686	.	OverlapStart	341	HVAEP1_G002420
chr-1	74531770	74533224	219	176493	.	OverlapStart	692	HVAEP1_G002437
chr-1	74569487	74571162	220	182038	.	FeatureInsidePeak	245	HVAEP1_G002439
chr-1	75670599	75671457	224	159854	.	OverlapStart	334	HVAEP1_G002485
chr-1	76176598	76179938	226	124701	.	OverlapStart	59	HVAEP1_G002502
chr-1	76364619	76366008	227	183222	.	PeakInsideFeature	712	HVAEP1_G002508
chr-1	76777509	76779408	230	111355	.	Upstream	3793	HVAEP1_G002525
chr-1	77455582	77459630	231	272790	.	OverlapStart	206	HVAEP1_G002539
chr-1	78284692	78286361	236	179071	.	Upstream	29503	HVAEP1_G002565
chr-1	78636111	78636695	238	110032	.	Upstream	8036	HVAEP1_G002577
chr-1	78829211	78830621	239	179375	.	Upstream	4080	HVAEP1_G002583
chr-1	78919944	78921236	240	207978	.	OverlapStart	509	HVAEP1_G002586
chr-1	79540289	79540692	243	154040	.	Upstream	729	HVAEP1_G002607
chr-1	79649397	79649964	245	90299	.	OverlapStart	155	HVAEP1_G002609
chr-1	80168393	80170812	249	97450	.	Upstream	17571	HVAEP1_G002632
chr-10	367982	371116	252	296810	.	OverlapStart	635	HVAEP1_G017680
chr-10	1559690	1561171	253	102249	.	PeakInsideFeature	11263	HVAEP1_G017700
chr-10	2049851	2051701	254	175468	.	Upstream	10566	HVAEP1_G017708
chr-10	2328971	2330631	255	110733	.	Upstream	8420	HVAEP1_G017717
chr-10	4341225	4342834	260	218268	.	Downstream	5180	HVAEP1_G017771
chr-10	4548922	4550281	261	263116	.	OverlapStart	255	HVAEP1_G017782
chr-10	5063386	5064691	262	208656	.	OverlapStart	644	HVAEP1_G017800
chr-10	6600780	6601534	266	188387	.	OverlapStart	139	HVAEP1_G017833
chr-10	8619264	8622041	270	349922	.	OverlapStart	154	HVAEP1_G017879
chr-10	8630974	8632058	271	155295	.	OverlapStart	131	HVAEP1_G017883
chr-10	9098909	9100857	274	94222	.	Upstream	13176	HVAEP1_G017895
chr-10	9122212	9123377	275	178269	.	OverlapStart	382	HVAEP1_G017896
chr-10	9373733	9376347	276	344460	.	Upstream	4170	HVAEP1_G017904
chr-10	10241376	10244918	279	309234	.	Upstream	13636	HVAEP1_G017924
chr-10	10838521	10839872	282	160720	.	PeakInsideFeature	6424	HVAEP1_G017943
chr-10	11623019	11624592	286	146915	.	OverlapStart	552	HVAEP1_G017981
chr-10	11627703	11629334	287	186916	.	Upstream	4161	HVAEP1_G017981
chr-10	11685332	11686113	288	85773	.	OverlapStart	294	HVAEP1_G017983
chr-10	11965380	11965800	289	105577	.	Upstream	10469	HVAEP1_G018001
chr-10	11984911	11985963	291	121800	.	OverlapStart	153	HVAEP1_G018002
chr-10	12170936	12171897	293	117661	.	OverlapStart	65	HVAEP1_G018009
chr-10	12273475	12274887	294	140781	.	FeatureInsidePeak	552	HVAEP1_G018011
chr-10	13932379	13933895	296	117888	.	PeakInsideFeature	933	HVAEP1_G018066
chr-10	14131890	14134357	297	118769	.	OverlapStart	1105	HVAEP1_G018071
chr-10	15106939	15108509	298	172442	.	OverlapStart	148	HVAEP1_G018100
chr-10	15931177	15933753	301	272538	.	OverlapStart	780	HVAEP1_G018118
chr-10	17243635	17244879	305	137604	.	OverlapStart	529	HVAEP1_G018149
chr-10	17351060	17352498	307	129158	.	OverlapStart	479	HVAEP1_G018153
chr-10	17777996	17778626	308	142829	.	Upstream	3593	HVAEP1_G018166
chr-10	17912889	17913664	309	154494	.	OverlapStart	207	HVAEP1_G018169
chr-10	18656866	18658109	310	130566	.	Downstream	14235	HVAEP1_G018188
chr-10	19129011	19130728	311	128443	.	Upstream	1511	HVAEP1_G018203
chr-10	19172220	19173096	312	105080	.	OverlapStart	141	HVAEP1_G018207
chr-10	19270118	19271392	314	99994	.	OverlapStart	543	HVAEP1_G018213
chr-10	19490085	19492107	315	168355	.	OverlapStart	835	HVAEP1_G018219
chr-10	19753598	19755704	316	137829	.	OverlapStart	695	HVAEP1_G018231
chr-10	19821642	19824080	318	159868	.	Upstream	1750	HVAEP1_G018234
chr-10	19926818	19928734	319	139608	.	Downstream	11029	HVAEP1_G018237
chr-10	20180591	20181928	320	203127	.	OverlapStart	387	HVAEP1_G018246
chr-10	20240868	20241651	321	123718	.	OverlapStart	169	HVAEP1_G018253
chr-10	20243481	20244237	322	134293	.	OverlapStart	153	HVAEP1_G018254
chr-10	20297280	20299964	324	321984	.	OverlapStart	120	HVAEP1_G018256
chr-10	20891230	20892618	326	263277	.	OverlapStart	62	HVAEP1_G018281
chr-10	21576008	21577700	330	130853	.	Upstream	2139	HVAEP1_G018311
chr-10	21645706	21646922	332	232298	.	OverlapStart	591	HVAEP1_G018313
chr-10	21750939	21753136	333	145431	.	OverlapStart	912	HVAEP1_G018320
chr-10	21928513	21929708	334	131665	.	Upstream	9025	HVAEP1_G018325
chr-10	22306431	22307885	337	147682	.	OverlapStart	329	HVAEP1_G018333
chr-10	22907935	22909412	340	183438	.	OverlapStart	454	HVAEP1_G018354
chr-10	23158880	23160237	342	110793	.	OverlapStart	370	HVAEP1_G018363
chr-10	23173397	23174342	343	111632	.	OverlapStart	458	HVAEP1_G018364
chr-10	23460037	23461478	344	92543	.	OverlapStart	32	HVAEP1_G018370
chr-10	24356735	24358865	345	95243	.	OverlapStart	1048	HVAEP1_G018390
chr-10	24579859	24581912	347	129034	.	OverlapStart	494	HVAEP1_G018397
chr-10	26518788	26521286	350	217624	.	OverlapStart	193	HVAEP1_G018458
chr-10	26789146	26790471	351	178749	.	OverlapStart	141	HVAEP1_G018471
chr-10	26876086	26878107	352	112119	.	OverlapStart	898	HVAEP1_G018475
chr-10	28316849	28317418	358	149737	.	Upstream	9079	HVAEP1_G018514
chr-10	28924414	28925045	361	165807	.	Upstream	10487	HVAEP1_G018532
chr-10	29637618	29638877	362	117275	.	OverlapStart	287	HVAEP1_G018565
chr-10	30448717	30449990	363	100560	.	Upstream	1819	HVAEP1_G018593
chr-10	31115385	31116821	364	143156	.	Downstream	15118	HVAEP1_G018617
chr-10	31230202	31231868	365	393158	.	OverlapStart	593	HVAEP1_G018621
chr-10	31430762	31432445	367	215123	.	Downstream	23100	HVAEP1_G018626
chr-10	31575913	31578246	369	393754	.	Upstream	53541	HVAEP1_G018628
chr-10	33182270	33183733	378	93538	.	OverlapStart	562	HVAEP1_G018672
chr-10	33299790	33302454	379	141685	.	Upstream	7618	HVAEP1_G018673
chr-10	34026434	34027638	380	327558	.	OverlapStart	311	HVAEP1_G018701
chr-10	34250357	34252607	381	130405	.	OverlapStart	60	HVAEP1_G018706
chr-10	34569679	34570916	382	146395	.	OverlapStart	362	HVAEP1_G018722
chr-10	36151312	36152892	384	123598	.	Upstream	3661	HVAEP1_G018777
chr-10	37709082	37709704	385	265265	.	OverlapStart	46	HVAEP1_G018822
chr-10	37979102	37980545	386	110978	.	PeakInsideFeature	1253	HVAEP1_G018830
chr-10	39435825	39438840	391	277111	.	Upstream	1761	HVAEP1_G018879
chr-10	39439043	39439795	392	127358	.	OverlapStart	326	HVAEP1_G018879
chr-10	40719670	40720903	394	120310	.	OverlapStart	516	HVAEP1_G018930
chr-10	40933108	40934971	396	155446	.	Downstream	37485	HVAEP1_G018935
chr-10	41007163	41008266	397	146310	.	PeakInsideFeature	31079	HVAEP1_G018934
chr-10	41070305	41071061	398	206215	.	Upstream	2163	HVAEP1_G018936
chr-10	41194085	41194567	399	139176	.	OverlapStart	137	HVAEP1_G018943
chr-10	41536372	41538842	401	207401	.	OverlapStart	38	HVAEP1_G018956
chr-10	41883916	41885983	403	182170	.	FeatureInsidePeak	95	HVAEP1_G018972
chr-10	42305430	42306432	406	103001	.	Upstream	599	HVAEP1_G018989
chr-10	43467998	43469724	407	405685	.	OverlapStart	737	HVAEP1_G019020
chr-10	43548726	43549995	408	141941	.	OverlapStart	283	HVAEP1_G019022
chr-10	44377989	44379642	412	160078	.	OverlapStart	779	HVAEP1_G019051
chr-10	45575882	45577472	414	234475	.	PeakInsideFeature	5946	HVAEP1_G019076
chr-10	46244973	46246115	415	118864	.	FeatureInsidePeak	310	HVAEP1_G019097
chr-10	46753776	46754948	418	89996	.	PeakInsideFeature	6342	HVAEP1_G019113
chr-10	47043604	47045606	420	184712	.	OverlapStart	771	HVAEP1_G019123
chr-10	48456652	48459605	421	129908	.	PeakInsideFeature	2193	HVAEP1_G019149
chr-10	49313328	49314481	425	91264	.	Upstream	1696	HVAEP1_G019169
chr-10	49337043	49338964	426	170260	.	FeatureInsidePeak	295	HVAEP1_G019172
chr-10	49973888	49976096	429	592915	.	Upstream	3165	HVAEP1_G019191
chr-10	51983554	51984793	431	145393	.	Upstream	1375	HVAEP1_G019247
chr-10	52091424	52092415	432	271308	.	OverlapStart	267	HVAEP1_G019250
chr-10	52153079	52154339	433	107649	.	OverlapStart	25	HVAEP1_G019254
chr-10	52358882	52360698	434	186519	.	Downstream	25151	HVAEP1_G019262
chr-10	52817580	52819782	437	188503	.	OverlapStart	675	HVAEP1_G019283
chr-10	52855704	52857737	439	121406	.	Upstream	8239	HVAEP1_G019285
chr-10	53108516	53109898	440	145078	.	Upstream	1501	HVAEP1_G019296
chr-10	53536704	53539939	441	300647	.	PeakInsideFeature	2839	HVAEP1_G019313
chr-10	53818498	53820498	442	141162	.	PeakInsideFeature	4167	HVAEP1_G019323
chr-10	53915281	53916501	443	114215	.	OverlapStart	91	HVAEP1_G019327
chr-10	53969814	53970969	444	113398	.	PeakInsideFeature	966	HVAEP1_G019329
chr-10	54169665	54170535	445	112829	.	Downstream	12054	HVAEP1_G019338
chr-11	1402885	1404340	449	142642	.	OverlapStart	379	HVAEP1_G019413
chr-11	1623506	1626982	450	244452	.	FeatureInsidePeak	972	HVAEP1_G019427
chr-11	1752315	1753759	451	122610	.	OverlapStart	550	HVAEP1_G019431
chr-11	2108817	2110318	454	98738	.	FeatureInsidePeak	214	HVAEP1_G019440
chr-11	2156150	2157501	455	128901	.	Upstream	906	HVAEP1_G019441
chr-11	3343704	3345330	458	200552	.	FeatureInsidePeak	194	HVAEP1_G019473
chr-11	3347232	3349065	459	194176	.	Upstream	3825	HVAEP1_G019473
chr-11	3371014	3372984	460	88849	.	OverlapStart	146	HVAEP1_G019474
chr-11	3458877	3461085	461	139560	.	Upstream	20018	HVAEP1_G019476
chr-11	3503044	3506132	462	167340	.	Downstream	24589	HVAEP1_G019476
chr-11	3649505	3650636	463	144937	.	Upstream	4958	HVAEP1_G019479
chr-11	3744836	3746036	467	218592	.	OverlapStart	536	HVAEP1_G019482
chr-11	3807679	3809457	468	170438	.	Upstream	12828	HVAEP1_G019483
chr-11	3958928	3960222	469	165926	.	Downstream	15432	HVAEP1_G019489
chr-11	4045361	4046911	470	168702	.	Downstream	9531	HVAEP1_G019493
chr-11	4344746	4345741	472	126090	.	OverlapStart	110	HVAEP1_G019507
chr-11	4853650	4855208	476	275209	.	PeakInsideFeature	854	HVAEP1_G019519
chr-11	5051418	5052643	477	104798	.	Upstream	6138	HVAEP1_G019529
chr-11	5158596	5159513	478	95740	.	Upstream	12369	HVAEP1_G019530
chr-11	5169524	5171098	479	137941	.	Downstream	16521	HVAEP1_G019534
chr-11	5185676	5188447	480	1782085	.	OverlapStart	229	HVAEP1_G019534
chr-11	5749012	5750445	483	389753	.	OverlapStart	510	HVAEP1_G019551
chr-11	7093326	7094356	488	133625	.	Upstream	600	HVAEP1_G019602
chr-11	7141356	7142695	489	102573	.	OverlapStart	347	HVAEP1_G019606
chr-11	7164335	7165985	490	111586	.	PeakInsideFeature	5368	HVAEP1_G019607
chr-11	7405096	7407155	493	369514	.	OverlapStart	62	HVAEP1_G019612
chr-11	7511422	7513648	494	177215	.	OverlapStart	639	HVAEP1_G019615
chr-11	8045448	8046871	496	132945	.	Upstream	32604	HVAEP1_G019637
chr-11	9446875	9448379	498	134804	.	FeatureInsidePeak	35	HVAEP1_G019675
chr-11	9677986	9680006	499	98744	.	FeatureInsidePeak	716	HVAEP1_G019680
chr-11	10613185	10615894	504	193275	.	OverlapStart	171	HVAEP1_G019717
chr-11	11421141	11423258	506	232029	.	OverlapStart	89	HVAEP1_G019737
chr-11	12842574	12843163	511	154135	.	OverlapStart	23	HVAEP1_G019786
chr-11	12959724	12961327	512	290302	.	Upstream	1003	HVAEP1_G019790
chr-11	13100407	13101538	514	192543	.	Downstream	11937	HVAEP1_G019798
chr-11	13481711	13483683	516	102456	.	OverlapStart	429	HVAEP1_G019810
chr-11	13607778	13609757	517	175152	.	Upstream	9936	HVAEP1_G019812
chr-11	13643008	13643860	518	103587	.	Upstream	6992	HVAEP1_G019814
chr-11	13778779	13780589	519	121546	.	OverlapStart	778	HVAEP1_G019822
chr-11	14941351	14943513	522	96636	.	OverlapStart	149	HVAEP1_G019858
chr-11	15286526	15287520	523	109191	.	Upstream	28522	HVAEP1_G019872
chr-11	15292809	15294740	524	179324	.	Upstream	35273	HVAEP1_G019872
chr-11	15608949	15610097	526	108941	.	Upstream	14800	HVAEP1_G019879
chr-11	15637594	15639030	527	99312	.	PeakInsideFeature	2502	HVAEP1_G019880
chr-11	15711742	15712465	528	305650	.	Upstream	829	HVAEP1_G019883
chr-11	15781588	15783301	529	95373	.	Upstream	7319	HVAEP1_G019884
chr-11	16180715	16183509	530	277092	.	OverlapStart	68	HVAEP1_G019897
chr-11	16834210	16834902	534	151673	.	PeakInsideFeature	376	HVAEP1_G019923
chr-11	17682448	17683733	535	160073	.	PeakInsideFeature	870	HVAEP1_G019942
chr-11	18661677	18663536	538	104611	.	OverlapStart	257	HVAEP1_G019972
chr-11	19334632	19335991	540	130683	.	OverlapStart	264	HVAEP1_G019990
chr-11	20413790	20415595	541	177294	.	FeatureInsidePeak	676	HVAEP1_G020028
chr-11	21092612	21093473	542	158441	.	Upstream	1411	HVAEP1_G020059
chr-11	21094872	21096476	543	160280	.	OverlapStart	688	HVAEP1_G020061
chr-11	21262020	21262863	544	99454	.	PeakInsideFeature	12095	HVAEP1_G020071
chr-11	21657914	21659976	546	215495	.	OverlapStart	118	HVAEP1_G020087
chr-11	22250396	22252247	548	101175	.	Upstream	15361	HVAEP1_G020102
chr-11	22422882	22423774	549	89798	.	Upstream	4369	HVAEP1_G020109
chr-11	22679486	22680422	553	168526	.	FeatureInsidePeak	420	HVAEP1_G020119
chr-11	24071963	24073198	556	177370	.	OverlapStart	208	HVAEP1_G020160
chr-11	24091949	24093266	557	298810	.	OverlapStart	114	HVAEP1_G020163
chr-11	24218983	24221342	558	229729	.	FeatureInsidePeak	453	HVAEP1_G020165
chr-11	26100406	26101864	563	114803	.	Upstream	15080	HVAEP1_G020223
chr-11	26594257	26595979	566	135940	.	Upstream	10728	HVAEP1_G020248
chr-11	26696199	26698031	568	120983	.	OverlapStart	47	HVAEP1_G020255
chr-11	27565829	27567878	570	136938	.	Downstream	10768	HVAEP1_G020280
chr-11	28055406	28056544	571	151178	.	FeatureInsidePeak	156	HVAEP1_G020288
chr-11	28228971	28230813	572	123471	.	Upstream	7007	HVAEP1_G020292
chr-11	28262455	28263488	574	97683	.	OverlapStart	456	HVAEP1_G020294
chr-11	28423199	28424345	575	138612	.	PeakInsideFeature	6416	HVAEP1_G020297
chr-11	28922257	28923934	579	168669	.	Downstream	5244	HVAEP1_G020316
chr-11	29719635	29720632	581	124188	.	Downstream	5139	HVAEP1_G020350
chr-11	29893640	29895489	582	188021	.	OverlapStart	163	HVAEP1_G020352
chr-11	30203778	30205237	583	246340	.	OverlapStart	431	HVAEP1_G020359
chr-11	30649500	30654954	585	471908	.	Downstream	7552	HVAEP1_G020374
chr-11	31657559	31659883	588	102185	.	OverlapStart	907	HVAEP1_G020418
chr-11	32821039	32822683	591	175488	.	OverlapStart	6	HVAEP1_G020450
chr-11	32836342	32837539	592	101172	.	OverlapStart	345	HVAEP1_G020453
chr-11	32907794	32908782	593	91589	.	Upstream	1107	HVAEP1_G020458
chr-11	32958222	32961687	594	228512	.	OverlapStart	270	HVAEP1_G020462
chr-11	33433968	33434800	595	111641	.	OverlapStart	39	HVAEP1_G020486
chr-11	33540981	33543720	596	184069	.	Upstream	8071	HVAEP1_G020492
chr-11	33932801	33934760	598	139595	.	OverlapStart	730	HVAEP1_G020505
chr-11	34982700	34983903	601	185195	.	OverlapStart	487	HVAEP1_G020531
chr-11	35358326	35359889	606	245204	.	PeakInsideFeature	3846	HVAEP1_G020555
chr-11	35443670	35444213	607	131348	.	Upstream	1145	HVAEP1_G020559
chr-11	35844815	35846613	610	119965	.	Upstream	2933	HVAEP1_G020575
chr-11	37138064	37138754	614	106444	.	PeakInsideFeature	25582	HVAEP1_G020624
chr-11	37143448	37145178	615	94608	.	PeakInsideFeature	19678	HVAEP1_G020624
chr-11	37426712	37427667	617	95574	.	OverlapStart	400	HVAEP1_G020631
chr-11	37428044	37429157	618	105020	.	OverlapStart	67	HVAEP1_G020632
chr-11	37476079	37477186	619	545853	.	Upstream	778	HVAEP1_G020634
chr-11	39632043	39633427	623	150198	.	OverlapStart	153	HVAEP1_G020697
chr-11	39655573	39656999	624	201701	.	OverlapStart	442	HVAEP1_G020698
chr-11	39996188	39997498	627	110139	.	FeatureInsidePeak	556	HVAEP1_G020711
chr-11	41221946	41222658	630	122147	.	Upstream	2355	HVAEP1_G020763
chr-11	41529713	41531162	631	261817	.	FeatureInsidePeak	649	HVAEP1_G020773
chr-11	41912698	41914589	634	225724	.	Downstream	18758	HVAEP1_G020787
chr-11	42025764	42027094	635	214595	.	Upstream	1073	HVAEP1_G020788
chr-11	42122598	42123951	637	112797	.	Upstream	5797	HVAEP1_G020792
chr-11	42157693	42158211	638	98252	.	OverlapStart	38	HVAEP1_G020793
chr-11	42303694	42305038	639	182597	.	Upstream	1822	HVAEP1_G020800
chr-11	42692184	42693194	640	225601	.	PeakInsideFeature	608	HVAEP1_G020814
chr-11	43062092	43063575	641	288010	.	FeatureInsidePeak	514	HVAEP1_G020831
chr-11	43090217	43091116	642	117808	.	OverlapStart	8	HVAEP1_G020832
chr-11	43538653	43539791	644	154210	.	PeakInsideFeature	4160	HVAEP1_G020840
chr-11	43879392	43881169	645	145364	.	PeakInsideFeature	1146	HVAEP1_G020851
chr-11	44436979	44438849	647	358725	.	OverlapStart	468	HVAEP1_G020870
chr-11	45955413	45956534	650	101353	.	PeakInsideFeature	612	HVAEP1_G020919
chr-11	46238372	46239726	651	211991	.	OverlapStart	118	HVAEP1_G020929
chr-11	46244125	46245887	652	107259	.	Upstream	5207	HVAEP1_G020929
chr-11	47436087	47437965	658	99816	.	Downstream	2579	HVAEP1_G020966
chr-11	47447365	47448568	659	242277	.	Upstream	8361	HVAEP1_G020966
chr-11	47470746	47471425	661	174653	.	PeakInsideFeature	533	HVAEP1_G020967
chr-11	47490924	47492615	662	234409	.	OverlapStart	587	HVAEP1_G020968
chr-11	47645978	47647949	664	284856	.	OverlapStart	879	HVAEP1_G020973
chr-11	48172373	48174499	665	188833	.	OverlapStart	581	HVAEP1_G020995
chr-11	48295479	48296616	666	135077	.	OverlapStart	524	HVAEP1_G020999
chr-11	48311027	48312296	667	114651	.	OverlapStart	618	HVAEP1_G021001
chr-11	48589615	48592022	668	450445	.	Downstream	10147	HVAEP1_G021013
chr-11	48747361	48748568	669	101216	.	OverlapStart	371	HVAEP1_G021019
chr-11	48886453	48887618	671	123979	.	OverlapStart	432	HVAEP1_G021022
chr-11	49115193	49117290	673	219221	.	Upstream	1557	HVAEP1_G021031
chr-11	49371210	49371691	674	107054	.	OverlapStart	7	HVAEP1_G021036
chr-11	49499995	49502240	676	205130	.	Upstream	26861	HVAEP1_G021041
chr-11	49531106	49532134	677	133871	.	OverlapStart	364	HVAEP1_G021042
chr-11	49809751	49811431	678	197463	.	OverlapStart	650	HVAEP1_G021047
chr-11	50537605	50537977	679	103016	.	PeakInsideFeature	220	HVAEP1_G021056
chr-11	51034960	51037837	682	502324	.	OverlapStart	1243	HVAEP1_G021072
chr-11	51105835	51106705	683	127662	.	OverlapStart	409	HVAEP1_G021074
chr-11	51322790	51324308	685	91169	.	OverlapStart	624	HVAEP1_G021083
chr-11	51503432	51506825	687	406419	.	Downstream	2629	HVAEP1_G021090
chr-11	51788875	51790143	689	193125	.	FeatureInsidePeak	395	HVAEP1_G021106
chr-11	52102969	52104429	690	96887	.	PeakInsideFeature	5183	HVAEP1_G021119
chr-11	52315889	52317993	691	311327	.	FeatureInsidePeak	558	HVAEP1_G021122
chr-11	52827853	52832816	692	543867	.	Downstream	54844	HVAEP1_G021141
chr-11	52845955	52847987	693	207749	.	Downstream	65898	HVAEP1_G021142
chr-11	52926330	52927332	694	144165	.	OverlapStart	28	HVAEP1_G021144
chr-11	53766914	53768565	697	250781	.	Downstream	12885	HVAEP1_G021178
chr-11	54407485	54409255	699	462629	.	FeatureInsidePeak	264	HVAEP1_G021197
chr-12	32544	34255	705	95169	.	Downstream	11989	HVAEP1_G021262
chr-12	90967	92663	706	146487	.	Downstream	11743	HVAEP1_G021272
chr-12	459451	459958	708	142371	.	Downstream	27557	HVAEP1_G021280
chr-12	699969	701615	710	89396	.	Downstream	10459	HVAEP1_G021288
chr-12	1223811	1224965	714	108255	.	OverlapStart	173	HVAEP1_G021299
chr-12	1328482	1330174	715	116263	.	OverlapStart	495	HVAEP1_G021302
chr-12	1992049	1993321	717	167312	.	OverlapStart	614	HVAEP1_G021327
chr-12	2162651	2163481	719	93224	.	OverlapStart	169	HVAEP1_G021333
chr-12	2324139	2325813	720	163248	.	PeakInsideFeature	887	HVAEP1_G021343
chr-12	2567065	2567735	723	94245	.	OverlapStart	321	HVAEP1_G021357
chr-12	2829435	2831106	725	212349	.	OverlapStart	251	HVAEP1_G021371
chr-12	2928213	2929374	726	112998	.	OverlapStart	172	HVAEP1_G021376
chr-12	3527624	3528388	728	167608	.	OverlapStart	38	HVAEP1_G021386
chr-12	3635942	3637382	729	101770	.	PeakInsideFeature	25885	HVAEP1_G021394
chr-12	4264044	4265579	733	124061	.	OverlapStart	143	HVAEP1_G021404
chr-12	4828719	4829943	735	134227	.	Downstream	9015	HVAEP1_G021424
chr-12	7187189	7188463	747	138728	.	OverlapStart	574	HVAEP1_G021510
chr-12	7418205	7419742	749	230700	.	PeakInsideFeature	6308	HVAEP1_G021517
chr-12	7924986	7926338	753	292872	.	Upstream	1456	HVAEP1_G021530
chr-12	8127108	8128847	754	120740	.	OverlapStart	749	HVAEP1_G021537
chr-12	8241257	8242136	755	92495	.	OverlapStart	383	HVAEP1_G021541
chr-12	8270724	8273315	756	250721	.	OverlapStart	1216	HVAEP1_G021544
chr-12	8280697	8283127	757	179059	.	Downstream	11109	HVAEP1_G021544
chr-12	8578737	8580463	759	116840	.	PeakInsideFeature	9161	HVAEP1_G021556
chr-12	9010676	9011878	763	139594	.	OverlapStart	500	HVAEP1_G021574
chr-12	9510790	9512383	767	143137	.	OverlapStart	331	HVAEP1_G021597
chr-12	9937163	9938541	768	232000	.	FeatureInsidePeak	453	HVAEP1_G021611
chr-12	10256858	10258313	769	132070	.	Upstream	1017	HVAEP1_G021617
chr-12	10562126	10563336	772	89293	.	OverlapStart	569	HVAEP1_G021628
chr-12	10656733	10657891	773	177596	.	OverlapStart	434	HVAEP1_G021632
chr-12	11138411	11139149	774	109275	.	OverlapStart	166	HVAEP1_G021644
chr-12	11338338	11339858	776	131875	.	OverlapStart	579	HVAEP1_G021654
chr-12	11367573	11368651	777	204617	.	Upstream	19293	HVAEP1_G021656
chr-12	11542272	11543236	779	313027	.	OverlapStart	264	HVAEP1_G021663
chr-12	11898518	11900072	780	114704	.	Upstream	2185	HVAEP1_G021671
chr-12	12622359	12623768	784	90362	.	OverlapStart	616	HVAEP1_G021689
chr-12	13748046	13749181	792	104741	.	OverlapStart	273	HVAEP1_G021724
chr-12	13950807	13952827	794	161980	.	OverlapStart	532	HVAEP1_G021730
chr-12	14861622	14863917	797	176820	.	Upstream	3031	HVAEP1_G021749
chr-12	16001428	16003008	799	244953	.	Upstream	959	HVAEP1_G021800
chr-12	16076346	16077932	800	158902	.	Upstream	1578	HVAEP1_G021802
chr-12	16210953	16212649	801	95110	.	Upstream	5386	HVAEP1_G021805
chr-12	16424724	16426171	802	107672	.	Downstream	4658	HVAEP1_G021810
chr-12	17538139	17539045	808	174684	.	OverlapStart	152	HVAEP1_G021839
chr-12	17908795	17910863	809	124919	.	OverlapStart	377	HVAEP1_G021851
chr-12	18155607	18157261	811	127877	.	OverlapStart	485	HVAEP1_G021854
chr-12	18179671	18180510	812	153929	.	OverlapStart	302	HVAEP1_G021855
chr-12	18386154	18387569	814	117486	.	PeakInsideFeature	712	HVAEP1_G021860
chr-12	18553888	18555314	815	126329	.	Upstream	783	HVAEP1_G021864
chr-12	18775787	18778685	816	144910	.	OverlapStart	949	HVAEP1_G021871
chr-12	18946967	18947821	817	110754	.	OverlapStart	343	HVAEP1_G021881
chr-12	19093866	19095838	818	286802	.	OverlapStart	902	HVAEP1_G021884
chr-12	19262205	19264140	819	107789	.	Upstream	15922	HVAEP1_G021889
chr-12	19576843	19579926	820	268760	.	PeakInsideFeature	2027	HVAEP1_G021902
chr-12	19612363	19614103	821	146102	.	OverlapStart	501	HVAEP1_G021904
chr-12	19987060	19988843	823	130412	.	FeatureInsidePeak	150	HVAEP1_G021913
chr-12	20125391	20126439	824	141946	.	Upstream	1546	HVAEP1_G021917
chr-12	20827367	20828323	825	95720	.	Upstream	3829	HVAEP1_G021943
chr-12	21013944	21015445	826	202275	.	OverlapStart	329	HVAEP1_G021950
chr-12	21460927	21462432	828	111575	.	OverlapStart	119	HVAEP1_G021963
chr-12	22117331	22119004	829	93482	.	Downstream	8088	HVAEP1_G021985
chr-12	22519606	22520611	830	113585	.	OverlapStart	256	HVAEP1_G021999
chr-12	22636666	22637531	831	155723	.	Upstream	1381	HVAEP1_G022003
chr-12	22849310	22849959	833	150378	.	Upstream	10950	HVAEP1_G022010
chr-12	23705655	23706395	834	230657	.	OverlapStart	124	HVAEP1_G022040
chr-12	23720681	23722160	835	129379	.	Upstream	15519	HVAEP1_G022040
chr-12	23787248	23788196	836	336774	.	Upstream	4289	HVAEP1_G022042
chr-12	23850832	23851559	837	99899	.	Upstream	2202	HVAEP1_G022045
chr-12	23925245	23925873	839	125536	.	Upstream	1689	HVAEP1_G022049
chr-12	24212399	24213392	841	114640	.	OverlapStart	22	HVAEP1_G022058
chr-12	24328964	24330287	842	126406	.	OverlapStart	332	HVAEP1_G022068
chr-12	24528994	24531151	844	215202	.	Upstream	1565	HVAEP1_G022075
chr-12	24619487	24621227	846	87034	.	OverlapStart	794	HVAEP1_G022078
chr-12	24668331	24672257	847	340820	.	OverlapStart	124	HVAEP1_G022081
chr-12	24706904	24709022	848	211224	.	OverlapStart	988	HVAEP1_G022082
chr-12	24719169	24720260	849	115543	.	Downstream	9876	HVAEP1_G022083
chr-12	25439719	25441336	851	111369	.	OverlapStart	153	HVAEP1_G022108
chr-12	25697849	25698605	853	135350	.	Upstream	2975	HVAEP1_G022115
chr-12	25807439	25808656	854	283856	.	OverlapStart	96	HVAEP1_G022118
chr-12	25860707	25861257	855	116387	.	PeakInsideFeature	604	HVAEP1_G022119
chr-12	26714595	26715123	858	186261	.	Upstream	3026	HVAEP1_G022144
chr-12	26769164	26771022	859	166056	.	PeakInsideFeature	8837	HVAEP1_G022146
chr-12	27170252	27171001	861	122782	.	OverlapStart	58	HVAEP1_G022159
chr-12	27189767	27191537	862	108226	.	Upstream	4968	HVAEP1_G022164
chr-12	27560193	27563065	865	212792	.	OverlapStart	1380	HVAEP1_G022180
chr-12	28299516	28302373	867	239436	.	Downstream	14263	HVAEP1_G022212
chr-12	28743078	28744796	870	220677	.	NA	NA	NA
chr-12	30468873	30469782	875	123592	.	PeakInsideFeature	490	HVAEP1_G022280
chr-12	30743510	30744233	876	113000	.	OverlapEnd	523	HVAEP1_G022288
chr-12	31323214	31323845	879	178287	.	OverlapStart	67	HVAEP1_G022302
chr-12	31380853	31382399	881	111879	.	FeatureInsidePeak	553	HVAEP1_G022304
chr-12	32637891	32639870	883	125159	.	PeakInsideFeature	34615	HVAEP1_G022345
chr-12	33103173	33104872	887	218835	.	PeakInsideFeature	14655	HVAEP1_G022357
chr-12	33347708	33349119	889	209112	.	OverlapStart	409	HVAEP1_G022363
chr-12	33875821	33876626	893	104334	.	Upstream	1291	HVAEP1_G022376
chr-12	33880278	33881396	894	151348	.	Upstream	868	HVAEP1_G022377
chr-12	33886077	33886835	895	92072	.	OverlapStart	148	HVAEP1_G022378
chr-12	34035225	34036394	896	91320	.	OverlapStart	191	HVAEP1_G022382
chr-12	34206176	34206938	897	126311	.	Upstream	4128	HVAEP1_G022389
chr-12	34444285	34445929	898	112516	.	PeakInsideFeature	21786	HVAEP1_G022397
chr-12	34488303	34490444	899	104335	.	Upstream	3670	HVAEP1_G022398
chr-12	35092220	35093333	903	123892	.	OverlapStart	85	HVAEP1_G022412
chr-12	35450119	35451761	904	140073	.	Upstream	1110	HVAEP1_G022422
chr-12	35717474	35719126	906	166555	.	OverlapStart	620	HVAEP1_G022432
chr-12	35830954	35832210	907	166571	.	Upstream	2109	HVAEP1_G022437
chr-12	36126235	36129049	909	118481	.	OverlapStart	368	HVAEP1_G022444
chr-12	36770989	36771871	912	111465	.	OverlapStart	369	HVAEP1_G022466
chr-12	36874202	36874676	914	103340	.	OverlapStart	172	HVAEP1_G022468
chr-12	38078644	38080242	916	191482	.	OverlapStart	698	HVAEP1_G022505
chr-12	38350563	38352473	917	243975	.	OverlapStart	368	HVAEP1_G022510
chr-12	38436198	38438137	918	131261	.	Upstream	12336	HVAEP1_G022511
chr-12	38463208	38465009	919	155360	.	Upstream	1512	HVAEP1_G022512
chr-12	39246802	39248056	922	129735	.	Downstream	2346	HVAEP1_G022536
chr-12	39606723	39609239	924	291481	.	FeatureInsidePeak	76	HVAEP1_G022557
chr-12	39821503	39823333	926	106301	.	Upstream	3493	HVAEP1_G022565
chr-12	40045012	40046625	927	88176	.	OverlapStart	47	HVAEP1_G022579
chr-12	40289773	40290685	928	216554	.	OverlapStart	245	HVAEP1_G022585
chr-12	40750954	40753913	929	302575	.	OverlapStart	348	HVAEP1_G022599
chr-12	41200276	41201023	930	106336	.	OverlapStart	127	HVAEP1_G022617
chr-12	41274410	41276032	932	217745	.	Upstream	16776	HVAEP1_G022620
chr-12	41627838	41628797	936	92803	.	PeakInsideFeature	689	HVAEP1_G022631
chr-12	42138161	42140074	937	140074	.	OverlapStart	769	HVAEP1_G022640
chr-12	42373089	42374534	939	243710	.	OverlapStart	537	HVAEP1_G022651
chr-12	42745464	42746911	940	103896	.	OverlapStart	529	HVAEP1_G022660
chr-12	42810936	42812711	941	98625	.	OverlapStart	42	HVAEP1_G022664
chr-12	43180132	43181086	943	130375	.	OverlapStart	103	HVAEP1_G022674
chr-12	43780228	43781495	945	131997	.	OverlapStart	467	HVAEP1_G022688
chr-12	44157152	44159288	948	263844	.	Downstream	4273	HVAEP1_G022697
chr-12	44214850	44215649	950	153637	.	OverlapStart	45	HVAEP1_G022700
chr-12	44714312	44714982	951	94758	.	Upstream	6676	HVAEP1_G022723
chr-12	44720039	44720865	952	243021	.	Upstream	871	HVAEP1_G022723
chr-12	45647297	45648022	955	103414	.	OverlapStart	228	HVAEP1_G022749
chr-12	45733429	45734759	956	402877	.	OverlapStart	601	HVAEP1_G022752
chr-12	45752683	45754823	958	196156	.	FeatureInsidePeak	136	HVAEP1_G022753
chr-12	46029730	46031699	960	126181	.	OverlapStart	378	HVAEP1_G022760
chr-12	46447352	46448414	962	158760	.	OverlapStart	210	HVAEP1_G022774
chr-12	46454602	46456062	963	138778	.	OverlapStart	584	HVAEP1_G022775
chr-12	46920157	46922761	964	137431	.	FeatureInsidePeak	316	HVAEP1_G022793
chr-12	47147898	47149818	965	238148	.	Upstream	1806	HVAEP1_G022801
chr-12	47815560	47816829	966	115510	.	PeakInsideFeature	1059	HVAEP1_G022820
chr-12	48004168	48005300	967	97254	.	Upstream	6017	HVAEP1_G022823
chr-12	48101600	48103557	969	176922	.	OverlapStart	76	HVAEP1_G022828
chr-12	48131308	48132920	970	287148	.	OverlapStart	433	HVAEP1_G022829
chr-12	48393781	48394534	973	98531	.	OverlapStart	296	HVAEP1_G022838
chr-12	48621584	48623419	975	146387	.	FeatureInsidePeak	699	HVAEP1_G022843
chr-12	48769224	48770493	977	95675	.	Upstream	4796	HVAEP1_G022848
chr-12	50290012	50290608	980	105918	.	OverlapStart	162	HVAEP1_G022882
chr-12	51757928	51759059	984	147633	.	OverlapStart	549	HVAEP1_G022925
chr-12	52194336	52194984	986	134276	.	OverlapStart	103	HVAEP1_G022939
chr-12	52356247	52357937	987	155131	.	OverlapStart	683	HVAEP1_G022943
chr-12	52966967	52968322	990	134505	.	OverlapStart	158	HVAEP1_G022969
chr-12	53138335	53139650	991	189621	.	Upstream	1896	HVAEP1_G022976
chr-12	53580161	53582007	993	328444	.	FeatureInsidePeak	743	HVAEP1_G022988
chr-12	54292593	54294113	997	116416	.	OverlapStart	295	HVAEP1_G023010
chr-12	55085980	55086833	1001	158938	.	Upstream	4762	HVAEP1_G023030
chr-12	55210629	55212476	1002	157070	.	OverlapStart	74	HVAEP1_G023032
chr-12	55578408	55579769	1004	101812	.	Upstream	2139	HVAEP1_G023042
chr-12	56463036	56464950	1007	124176	.	Upstream	7551	HVAEP1_G023072
chr-12	56652697	56654313	1008	152672	.	Upstream	4178	HVAEP1_G023075
chr-12	56744368	56745605	1009	113250	.	Upstream	8097	HVAEP1_G023078
chr-12	56866951	56868658	1010	263777	.	OverlapStart	249	HVAEP1_G023084
chr-12	57340787	57343183	1014	189602	.	Downstream	12240	HVAEP1_G023107
chr-12	58044656	58046624	1016	137455	.	FeatureInsidePeak	754	HVAEP1_G023133
chr-12	58361137	58361885	1017	118874	.	PeakInsideFeature	1155	HVAEP1_G023140
chr-12	59644895	59646478	1021	202932	.	Upstream	3250	HVAEP1_G023178
chr-12	60851120	60853057	1027	142595	.	OverlapStart	489	HVAEP1_G023207
chr-12	60920280	60921966	1028	116596	.	OverlapStart	443	HVAEP1_G023211
chr-12	61150659	61151583	1029	179842	.	OverlapStart	155	HVAEP1_G023222
chr-12	61350544	61353211	1030	312834	.	Upstream	1851	HVAEP1_G023227
chr-12	61679697	61681312	1031	115446	.	Downstream	11717	HVAEP1_G023235
chr-12	61710884	61711862	1032	132955	.	PeakInsideFeature	847	HVAEP1_G023237
chr-12	62160702	62161982	1033	211732	.	OverlapStart	577	HVAEP1_G023251
chr-12	62293975	62296604	1034	221055	.	OverlapStart	899	HVAEP1_G023258
chr-12	62949144	62950147	1035	107021	.	OverlapStart	198	HVAEP1_G023280
chr-12	62954511	62955880	1036	168254	.	Upstream	5352	HVAEP1_G023280
chr-12	62973125	62974846	1037	464435	.	PeakInsideFeature	12221	HVAEP1_G023281
chr-12	63183301	63186442	1038	185669	.	Upstream	6538	HVAEP1_G023288
chr-12	64494061	64495898	1045	142093	.	OverlapStart	233	HVAEP1_G023332
chr-12	64523065	64523510	1046	107070	.	Upstream	1593	HVAEP1_G023337
chr-12	65049331	65049864	1049	119115	.	OverlapStart	215	HVAEP1_G023350
chr-12	65422161	65423870	1050	247625	.	OverlapStart	62	HVAEP1_G023360
chr-12	66235232	66237164	1055	112475	.	FeatureInsidePeak	784	HVAEP1_G023396
chr-12	66432895	66433999	1056	113853	.	OverlapStart	339	HVAEP1_G023400
chr-12	66443567	66445329	1057	137524	.	OverlapStart	757	HVAEP1_G023401
chr-12	66480849	66482730	1058	149774	.	OverlapStart	492	HVAEP1_G023402
chr-12	66949701	66950279	1059	109094	.	Downstream	15689	HVAEP1_G023416
chr-12	67161600	67162689	1060	138658	.	OverlapStart	443	HVAEP1_G023422
chr-12	68438884	68441058	1062	126486	.	Downstream	3427	HVAEP1_G023452
chr-12	69375751	69377666	1064	246021	.	OverlapStart	575	HVAEP1_G023464
chr-12	69640194	69641937	1066	321303	.	OverlapStart	71	HVAEP1_G023474
chr-12	69846418	69848285	1067	99442	.	OverlapStart	279	HVAEP1_G023480
chr-12	69978367	69980039	1069	105345	.	Downstream	26113	HVAEP1_G023484
chr-12	70112664	70113484	1070	106515	.	OverlapStart	367	HVAEP1_G023492
chr-12	70700668	70702737	1072	119505	.	OverlapStart	868	HVAEP1_G023507
chr-12	70805211	70806297	1073	94837	.	Upstream	20239	HVAEP1_G023511
chr-12	71051046	71051765	1074	99724	.	OverlapStart	299	HVAEP1_G023520
chr-12	71115345	71116102	1075	97236	.	PeakInsideFeature	396	HVAEP1_G023524
chr-12	71272556	71274515	1077	138765	.	OverlapStart	781	HVAEP1_G023528
chr-12	71288450	71289173	1078	103700	.	Upstream	14495	HVAEP1_G023528
chr-12	71369319	71371160	1080	287875	.	OverlapStart	425	HVAEP1_G023531
chr-12	71759917	71761126	1081	255168	.	OverlapStart	11	HVAEP1_G023543
chr-12	71883096	71884690	1082	467273	.	PeakInsideFeature	3927	HVAEP1_G023547
chr-12	71928290	71929436	1083	153384	.	OverlapStart	300	HVAEP1_G023549
chr-12	72084178	72088648	1085	147564	.	Upstream	2259	HVAEP1_G023556
chr-12	72285922	72287552	1087	181083	.	Upstream	1028	HVAEP1_G023561
chr-12	72374377	72375909	1088	212678	.	OverlapStart	74	HVAEP1_G023562
chr-12	72873362	72875146	1090	213369	.	OverlapStart	120	HVAEP1_G023575
chr-12	73126434	73128461	1093	387293	.	OverlapStart	592	HVAEP1_G023581
chr-12	73276857	73278878	1094	270767	.	Downstream	18877	HVAEP1_G023592
chr-12	74197429	74199010	1099	116818	.	OverlapStart	253	HVAEP1_G023635
chr-12	74539082	74541795	1101	295498	.	Upstream	5133	HVAEP1_G023646
chr-12	74561289	74562724	1102	162683	.	OverlapStart	598	HVAEP1_G023647
chr-12	74666984	74668257	1103	221550	.	OverlapStart	54	HVAEP1_G023649
chr-12	74935830	74936490	1104	91739	.	OverlapStart	178	HVAEP1_G023659
chr-12	74987667	74989284	1105	123114	.	OverlapStart	159	HVAEP1_G023662
chr-12	75336975	75338712	1106	106898	.	PeakInsideFeature	2847	HVAEP1_G023669
chr-12	75527736	75529921	1108	156429	.	OverlapStart	819	HVAEP1_G023678
chr-12	76314999	76316340	1109	108682	.	Downstream	27177	HVAEP1_G023705
chr-12	76731904	76732956	1110	85386	.	OverlapStart	231	HVAEP1_G023713
chr-12	77109900	77110674	1111	92042	.	Upstream	702	HVAEP1_G023729
chr-12	77352387	77353650	1112	229088	.	OverlapStart	339	HVAEP1_G023736
chr-12	77881407	77883842	1114	105355	.	OverlapStart	964	HVAEP1_G023761
chr-12	77944682	77946167	1117	214893	.	OverlapStart	394	HVAEP1_G023762
chr-12	79218626	79220226	1118	120912	.	Upstream	1772	HVAEP1_G023797
chr-12	79322191	79324042	1119	191502	.	OverlapStart	809	HVAEP1_G023801
chr-12	79901454	79903303	1123	138216	.	OverlapStart	705	HVAEP1_G023817
chr-12	80191113	80192517	1125	108266	.	OverlapStart	212	HVAEP1_G023828
chr-12	80956068	80956937	1127	111064	.	Upstream	9571	HVAEP1_G023849
chr-12	81234211	81234855	1128	133761	.	OverlapStart	40	HVAEP1_G023853
chr-12	81247049	81248715	1129	179747	.	OverlapStart	65	HVAEP1_G023855
chr-12	81297848	81299112	1130	145092	.	Upstream	2472	HVAEP1_G023856
chr-12	82140892	82142046	1134	105810	.	Upstream	1590	HVAEP1_G023878
chr-12	82271696	82273739	1135	257606	.	Upstream	10151	HVAEP1_G023885
chr-12	82282656	82284918	1136	112544	.	OverlapStart	214	HVAEP1_G023885
chr-12	83058478	83061527	1139	217300	.	OverlapStart	1166	HVAEP1_G023920
chr-12	83246660	83247831	1140	155525	.	OverlapStart	302	HVAEP1_G023928
chr-12	83617503	83618246	1142	135285	.	Upstream	24415	HVAEP1_G023940
chr-12	84798387	84798983	1144	113245	.	Downstream	17513	HVAEP1_G024000
chr-12	84869422	84870560	1146	160101	.	OverlapStart	499	HVAEP1_G024005
chr-12	85156235	85159305	1147	103216	.	OverlapEnd	1926	HVAEP1_G024014
chr-13	14824	16782	1150	112531	.	Downstream	37009	HVAEP1_G024044
chr-13	205180	206479	1151	210496	.	OverlapStart	566	HVAEP1_G024056
chr-13	1227567	1228531	1152	118476	.	OverlapStart	447	HVAEP1_G024074
chr-13	1468102	1469254	1154	132526	.	Downstream	3039	HVAEP1_G024097
chr-13	1621118	1622923	1155	146514	.	OverlapStart	636	HVAEP1_G024107
chr-13	1771139	1772902	1156	298084	.	OverlapStart	504	HVAEP1_G024111
chr-13	2401554	2405696	1158	259626	.	Downstream	27654	HVAEP1_G024133
chr-13	2695579	2697265	1160	129993	.	OverlapStart	293	HVAEP1_G024143
chr-13	3843328	3846486	1163	518295	.	Downstream	11215	HVAEP1_G024172
chr-13	3945247	3947134	1164	336205	.	Upstream	20057	HVAEP1_G024177
chr-13	4159336	4161780	1166	140631	.	FeatureInsidePeak	921	HVAEP1_G024187
chr-13	4394252	4396353	1168	205101	.	Upstream	16131	HVAEP1_G024198
chr-13	4799979	4801287	1170	152100	.	Upstream	7882	HVAEP1_G024208
chr-13	4836580	4838449	1171	116536	.	Downstream	4228	HVAEP1_G024212
chr-13	5322692	5323914	1172	172680	.	OverlapStart	175	HVAEP1_G024220
chr-13	5401535	5402505	1174	326626	.	Downstream	7543	HVAEP1_G024224
chr-13	6965731	6967399	1177	199334	.	Upstream	17758	HVAEP1_G024253
chr-13	7658137	7660911	1179	171699	.	Downstream	2877	HVAEP1_G024276
chr-13	7883023	7885014	1180	157245	.	Upstream	15246	HVAEP1_G024291
chr-13	8039496	8041121	1183	191115	.	PeakInsideFeature	973	HVAEP1_G024302
chr-13	8450126	8450926	1186	111546	.	OverlapStart	286	HVAEP1_G024312
chr-13	8749940	8751637	1187	175957	.	Upstream	34021	HVAEP1_G024319
chr-13	11242778	11244024	1194	116044	.	Upstream	24527	HVAEP1_G024399
chr-13	11469997	11471355	1195	245653	.	OverlapStart	334	HVAEP1_G024406
chr-13	12164292	12166012	1198	109796	.	FeatureInsidePeak	112	HVAEP1_G024426
chr-13	12171809	12173561	1199	130340	.	Downstream	7645	HVAEP1_G024426
chr-13	12369365	12370638	1202	124155	.	OverlapStart	235	HVAEP1_G024432
chr-13	12845445	12846764	1203	117187	.	OverlapStart	304	HVAEP1_G024445
chr-13	13445137	13446445	1204	163326	.	Downstream	17093	HVAEP1_G024462
chr-13	13509626	13512362	1205	183051	.	Upstream	11111	HVAEP1_G024463
chr-13	13524243	13526170	1206	192644	.	OverlapStart	140	HVAEP1_G024465
chr-13	13720523	13722383	1209	146064	.	FeatureInsidePeak	188	HVAEP1_G024472
chr-13	14866735	14868241	1211	93937	.	OverlapStart	281	HVAEP1_G024495
chr-13	14924992	14927417	1212	197782	.	Upstream	43321	HVAEP1_G024497
chr-13	15199716	15200362	1213	106875	.	Upstream	6052	HVAEP1_G024505
chr-13	16179643	16180611	1218	122911	.	OverlapStart	361	HVAEP1_G024524
chr-13	16991055	16993616	1219	113560	.	Upstream	7924	HVAEP1_G024542
chr-13	17292657	17294370	1220	119284	.	PeakInsideFeature	23088	HVAEP1_G024555
chr-13	18103789	18104348	1222	97854	.	Downstream	15690	HVAEP1_G024579
chr-13	18142525	18144102	1223	116001	.	OverlapStart	386	HVAEP1_G024581
chr-13	18654436	18655715	1224	144739	.	FeatureInsidePeak	242	HVAEP1_G024607
chr-13	19669302	19670088	1225	112503	.	OverlapStart	255	HVAEP1_G024625
chr-13	19973570	19975609	1226	240280	.	Upstream	1924	HVAEP1_G024638
chr-13	19988390	19991021	1227	120458	.	PeakInsideFeature	1322	HVAEP1_G024640
chr-13	20321013	20321568	1230	109776	.	Upstream	1823	HVAEP1_G024660
chr-13	22309838	22312241	1236	92380	.	PeakInsideFeature	19029	HVAEP1_G024738
chr-13	22542027	22543182	1239	121290	.	OverlapStart	502	HVAEP1_G024746
chr-13	22692314	22693878	1241	102965	.	Downstream	2262	HVAEP1_G024751
chr-13	22695715	22696709	1242	136374	.	OverlapStart	52	HVAEP1_G024752
chr-13	23210875	23212304	1243	149942	.	OverlapStart	479	HVAEP1_G024771
chr-13	23436715	23437911	1244	166415	.	PeakInsideFeature	2037	HVAEP1_G024780
chr-13	23547561	23549661	1245	155115	.	OverlapStart	713	HVAEP1_G024785
chr-13	23845067	23846650	1246	88352	.	PeakInsideFeature	6878	HVAEP1_G024794
chr-13	24348937	24351040	1248	248762	.	OverlapStart	484	HVAEP1_G024812
chr-13	24630704	24632894	1249	96591	.	Upstream	1639	HVAEP1_G024818
chr-13	24657567	24658428	1250	201642	.	Upstream	1283	HVAEP1_G024820
chr-13	25226127	25228069	1254	111868	.	OverlapStart	73	HVAEP1_G024837
chr-13	26147604	26149792	1258	183191	.	Downstream	12999	HVAEP1_G024862
chr-13	26376043	26376777	1260	224236	.	Upstream	4466	HVAEP1_G024870
chr-13	27923715	27924917	1264	101056	.	Downstream	11525	HVAEP1_G024917
chr-13	28375111	28375810	1267	84610	.	PeakInsideFeature	919	HVAEP1_G024933
chr-13	28469851	28471430	1268	100783	.	OverlapStart	681	HVAEP1_G024934
chr-13	28610509	28611352	1269	192620	.	OverlapEnd	716	HVAEP1_G024941
chr-13	28758786	28760577	1270	100997	.	Upstream	34281	HVAEP1_G024946
chr-13	29578115	29578699	1274	104507	.	PeakInsideFeature	1455	HVAEP1_G024966
chr-13	29830882	29832376	1276	109283	.	Downstream	12870	HVAEP1_G024974
chr-13	30148348	30150155	1279	123531	.	Upstream	11753	HVAEP1_G024989
chr-13	30428158	30430703	1280	114951	.	Downstream	14931	HVAEP1_G024995
chr-13	31047063	31048485	1283	198707	.	OverlapStart	132	HVAEP1_G025013
chr-13	31276467	31277994	1284	153515	.	Downstream	4644	HVAEP1_G025029
chr-13	31424584	31425587	1285	175670	.	Downstream	7150	HVAEP1_G025039
chr-13	31578953	31579595	1286	137943	.	Upstream	1824	HVAEP1_G025044
chr-13	31692897	31694350	1287	164128	.	Downstream	15718	HVAEP1_G025050
chr-13	32062172	32062929	1288	133780	.	OverlapStart	241	HVAEP1_G025059
chr-13	33159795	33161162	1293	106835	.	OverlapStart	622	HVAEP1_G025089
chr-13	34117983	34120429	1296	222951	.	OverlapStart	642	HVAEP1_G025113
chr-13	34531055	34532680	1297	183229	.	OverlapStart	121	HVAEP1_G025130
chr-13	34585197	34586269	1298	158852	.	FeatureInsidePeak	471	HVAEP1_G025132
chr-13	35143361	35145460	1300	91346	.	Upstream	20155	HVAEP1_G025149
chr-13	35333055	35334013	1301	128821	.	OverlapStart	331	HVAEP1_G025152
chr-13	35468483	35469404	1302	98413	.	Downstream	16739	HVAEP1_G025161
chr-13	35885097	35888603	1303	322566	.	OverlapStart	581	HVAEP1_G025179
chr-13	37287371	37288847	1307	207876	.	Upstream	8275	HVAEP1_G025219
chr-13	37602400	37604308	1310	165086	.	OverlapStart	353	HVAEP1_G025228
chr-13	38633656	38635608	1313	243913	.	OverlapStart	537	HVAEP1_G025261
chr-13	38799666	38800659	1315	188586	.	Upstream	2643	HVAEP1_G025271
chr-13	38902433	38904549	1317	123102	.	OverlapStart	230	HVAEP1_G025274
chr-13	39005363	39006935	1319	106759	.	OverlapStart	218	HVAEP1_G025277
chr-13	39404965	39405868	1321	190867	.	OverlapStart	27	HVAEP1_G025294
chr-13	39582969	39585190	1322	133021	.	OverlapStart	146	HVAEP1_G025298
chr-13	39925023	39927036	1323	149178	.	Upstream	31968	HVAEP1_G025306
chr-13	39937811	39942390	1324	177043	.	Downstream	29371	HVAEP1_G025307
chr-13	40042587	40043512	1326	105112	.	Downstream	50912	HVAEP1_G025308
chr-13	40457501	40458395	1327	114200	.	Upstream	3398	HVAEP1_G025316
chr-13	40527058	40530284	1328	306823	.	Downstream	4002	HVAEP1_G025320
chr-13	42176030	42177012	1330	191699	.	Upstream	5167	HVAEP1_G025364
chr-13	42326722	42328296	1333	103035	.	PeakInsideFeature	30718	HVAEP1_G025369
chr-13	42417225	42418447	1334	111399	.	Upstream	1944	HVAEP1_G025373
chr-13	42520072	42521420	1336	174590	.	OverlapStart	612	HVAEP1_G025377
chr-13	42703696	42706692	1337	402425	.	OverlapStart	728	HVAEP1_G025384
chr-13	42901472	42903305	1338	146847	.	FeatureInsidePeak	394	HVAEP1_G025388
chr-13	43076784	43078481	1339	234405	.	OverlapStart	435	HVAEP1_G025392
chr-13	43869800	43872221	1343	264438	.	Upstream	4150	HVAEP1_G025412
chr-13	43980979	43982231	1344	87816	.	Downstream	18946	HVAEP1_G025418
chr-13	44320267	44321728	1347	301698	.	Upstream	2152	HVAEP1_G025429
chr-13	44503152	44505221	1349	477739	.	FeatureInsidePeak	107	HVAEP1_G025436
chr-13	44956093	44958282	1351	143539	.	OverlapStart	970	HVAEP1_G025455
chr-13	46199416	46199879	1354	136253	.	PeakInsideFeature	11267	HVAEP1_G025491
chr-13	46969242	46971869	1355	234868	.	OverlapStart	16	HVAEP1_G025526
chr-13	47246654	47248491	1356	99943	.	PeakInsideFeature	12404	HVAEP1_G025534
chr-13	47615197	47616009	1358	156106	.	Downstream	12232	HVAEP1_G025544
chr-13	47858063	47859538	1359	242228	.	OverlapStart	439	HVAEP1_G025549
chr-13	48177215	48178710	1362	126616	.	OverlapStart	677	HVAEP1_G025563
chr-13	48528040	48529151	1363	109301	.	FeatureInsidePeak	335	HVAEP1_G025573
chr-13	48748191	48750150	1364	147909	.	Upstream	1236	HVAEP1_G025577
chr-13	50105944	50107481	1368	333758	.	OverlapStart	520	HVAEP1_G025619
chr-13	50114270	50116307	1369	163461	.	OverlapStart	353	HVAEP1_G025620
chr-13	50177796	50178885	1370	262945	.	OverlapStart	513	HVAEP1_G025623
chr-13	50792970	50796181	1372	235688	.	Downstream	15475	HVAEP1_G025646
chr-13	51531675	51532858	1376	141973	.	FeatureInsidePeak	358	HVAEP1_G025664
chr-13	51766476	51767285	1380	92277	.	PeakInsideFeature	6285	HVAEP1_G025680
chr-13	51973103	51973992	1381	147707	.	OverlapStart	326	HVAEP1_G025683
chr-13	52010822	52011994	1382	120232	.	FeatureInsidePeak	316	HVAEP1_G025684
chr-13	52040926	52043321	1383	133365	.	Upstream	7498	HVAEP1_G025685
chr-13	52344558	52345900	1385	245825	.	OverlapStart	619	HVAEP1_G025692
chr-13	53498621	53500589	1388	138419	.	Upstream	2217	HVAEP1_G025726
chr-13	54099784	54100984	1390	106722	.	OverlapStart	72	HVAEP1_G025753
chr-13	54235236	54236414	1391	108168	.	PeakInsideFeature	2314	HVAEP1_G025758
chr-13	55130592	55132936	1393	317244	.	Upstream	6002	HVAEP1_G025794
chr-13	55239234	55241873	1394	170748	.	FeatureInsidePeak	33	HVAEP1_G025805
chr-13	55262846	55264754	1395	178045	.	OverlapStart	437	HVAEP1_G025806
chr-13	55467415	55469823	1399	177377	.	Upstream	24564	HVAEP1_G025816
chr-14	1119579	1120815	1402	221023	.	Upstream	1983	HVAEP1_G025846
chr-14	1462872	1463548	1403	186593	.	Upstream	925	HVAEP1_G025860
chr-14	2617717	2618294	1407	105559	.	Downstream	18366	HVAEP1_G025893
chr-14	3267418	3268727	1410	205785	.	OverlapStart	592	HVAEP1_G025913
chr-14	3422129	3424135	1411	168296	.	PeakInsideFeature	3567	HVAEP1_G025918
chr-14	3448299	3449932	1412	129987	.	Upstream	1835	HVAEP1_G025917
chr-14	3913545	3914935	1413	338785	.	Downstream	16422	HVAEP1_G025930
chr-14	3936406	3939581	1414	312701	.	Downstream	6085	HVAEP1_G025931
chr-14	4636970	4638542	1417	133630	.	OverlapStart	160	HVAEP1_G025955
chr-14	5718004	5718257	1420	93126	.	PeakInsideFeature	464	HVAEP1_G025982
chr-14	6487830	6490292	1421	120483	.	OverlapStart	887	HVAEP1_G026012
chr-14	6743104	6745010	1422	100670	.	Upstream	21150	HVAEP1_G026019
chr-14	7676930	7679498	1424	129696	.	OverlapStart	613	HVAEP1_G026039
chr-14	7768311	7770896	1425	142698	.	OverlapStart	923	HVAEP1_G026040
chr-14	8345608	8346414	1426	186776	.	Upstream	2399	HVAEP1_G026054
chr-14	8900128	8902143	1428	115623	.	Downstream	32061	HVAEP1_G026065
chr-14	8935132	8936582	1429	118667	.	OverlapStart	446	HVAEP1_G026066
chr-14	9091998	9094188	1430	427694	.	Upstream	2042	HVAEP1_G026076
chr-14	9461989	9464825	1431	250979	.	Upstream	10008	HVAEP1_G026088
chr-14	9505765	9506833	1432	91638	.	OverlapStart	128	HVAEP1_G026089
chr-14	9645203	9646608	1433	184226	.	OverlapStart	513	HVAEP1_G026094
chr-14	10162954	10164799	1434	92118	.	FeatureInsidePeak	559	HVAEP1_G026114
chr-14	10904349	10905369	1435	96461	.	Upstream	2090	HVAEP1_G026143
chr-14	10959347	10960219	1436	370070	.	OverlapStart	6	HVAEP1_G026145
chr-14	11745625	11746157	1438	97949	.	Upstream	10215	HVAEP1_G026166
chr-14	11782977	11783988	1439	136317	.	OverlapStart	468	HVAEP1_G026171
chr-14	11952849	11954488	1440	116508	.	OverlapStart	58	HVAEP1_G026177
chr-14	12546206	12547849	1442	147896	.	Downstream	19924	HVAEP1_G026197
chr-14	12676557	12677746	1444	132282	.	Upstream	14201	HVAEP1_G026200
chr-14	12856202	12858096	1445	180148	.	OverlapStart	890	HVAEP1_G026205
chr-14	13987872	13989269	1450	131793	.	FeatureInsidePeak	648	HVAEP1_G026230
chr-14	15479443	15480222	1452	178967	.	Upstream	4253	HVAEP1_G026274
chr-14	16466402	16468432	1455	143903	.	Upstream	1057	HVAEP1_G026306
chr-14	17155565	17158156	1457	202108	.	Upstream	6079	HVAEP1_G026325
chr-14	17779938	17781373	1459	111215	.	OverlapStart	464	HVAEP1_G026336
chr-14	17952332	17953992	1461	189891	.	Upstream	16143	HVAEP1_G026339
chr-14	18263060	18265019	1462	228293	.	Upstream	4152	HVAEP1_G026351
chr-14	18342185	18343862	1464	92391	.	Upstream	1181	HVAEP1_G026353
chr-14	19169174	19170717	1467	91168	.	OverlapStart	253	HVAEP1_G026376
chr-14	19178382	19179505	1468	128169	.	Upstream	579	HVAEP1_G026378
chr-14	19743513	19744064	1469	135537	.	Upstream	14827	HVAEP1_G026398
chr-14	19952718	19953842	1471	303722	.	OverlapStart	510	HVAEP1_G026404
chr-14	20619176	20621228	1474	95190	.	Upstream	12071	HVAEP1_G026425
chr-14	20864868	20867645	1476	189084	.	FeatureInsidePeak	1090	HVAEP1_G026430
chr-14	21452149	21453444	1477	97274	.	OverlapStart	233	HVAEP1_G026444
chr-14	22300180	22303088	1478	264154	.	OverlapStart	46	HVAEP1_G026469
chr-14	22710253	22711592	1479	178514	.	Upstream	28039	HVAEP1_G026474
chr-14	23272860	23274388	1482	103504	.	OverlapStart	680	HVAEP1_G026496
chr-14	23579971	23581846	1484	458976	.	PeakInsideFeature	9516	HVAEP1_G026505
chr-14	23831328	23833322	1485	229094	.	OverlapStart	865	HVAEP1_G026508
chr-14	24312887	24315207	1486	276168	.	OverlapStart	68	HVAEP1_G026526
chr-14	25192017	25193769	1490	171778	.	Downstream	6797	HVAEP1_G026553
chr-14	27105646	27106774	1496	173977	.	OverlapStart	147	HVAEP1_G026619
chr-14	27514205	27516068	1497	138236	.	OverlapStart	74	HVAEP1_G026632
chr-14	27578425	27579397	1498	100029	.	OverlapStart	157	HVAEP1_G026633
chr-14	28294304	28294987	1500	104968	.	OverlapStart	27	HVAEP1_G026663
chr-14	28838121	28839486	1502	125681	.	Upstream	14160	HVAEP1_G026682
chr-14	29036025	29038071	1504	212439	.	OverlapStart	101	HVAEP1_G026689
chr-14	29258877	29260247	1505	137512	.	Downstream	8606	HVAEP1_G026696
chr-14	29469160	29471570	1506	150004	.	OverlapStart	30	HVAEP1_G026703
chr-14	30342899	30344677	1507	144676	.	Upstream	14735	HVAEP1_G026737
chr-14	31265476	31266550	1509	101426	.	OverlapStart	150	HVAEP1_G026764
chr-14	31267223	31268016	1510	183875	.	OverlapStart	69	HVAEP1_G026765
chr-14	31439462	31441240	1511	149473	.	OverlapStart	582	HVAEP1_G026772
chr-14	31541458	31542463	1512	108348	.	OverlapStart	176	HVAEP1_G026774
chr-14	31587712	31589020	1513	93799	.	OverlapStart	210	HVAEP1_G026775
chr-14	33398141	33400104	1516	224490	.	Upstream	2007	HVAEP1_G026836
chr-14	34232170	34233104	1521	168904	.	FeatureInsidePeak	417	HVAEP1_G026863
chr-14	34312468	34313697	1522	93415	.	Upstream	27386	HVAEP1_G026865
chr-14	35070704	35071975	1524	105353	.	OverlapStart	357	HVAEP1_G026886
chr-14	35339903	35343297	1525	282755	.	Downstream	4448	HVAEP1_G026897
chr-14	35492950	35495039	1526	238747	.	Upstream	3021	HVAEP1_G026901
chr-14	35939899	35942549	1528	187097	.	Upstream	2770	HVAEP1_G026913
chr-14	36331432	36337562	1529	540257	.	Downstream	6217	HVAEP1_G026930
chr-14	37067584	37069243	1532	116241	.	OverlapStart	140	HVAEP1_G026952
chr-14	37410385	37412978	1533	136955	.	OverlapStart	688	HVAEP1_G026965
chr-14	37513092	37513944	1534	91428	.	PeakInsideFeature	8677	HVAEP1_G026971
chr-14	37631892	37634919	1536	122151	.	Downstream	3482	HVAEP1_G026975
chr-14	37983563	37986476	1537	383464	.	PeakInsideFeature	2225	HVAEP1_G026979
chr-14	38073103	38074385	1538	143930	.	Upstream	2371	HVAEP1_G026981
chr-14	38161773	38162886	1539	103074	.	Upstream	3337	HVAEP1_G026984
chr-14	38318623	38319825	1540	312095	.	Downstream	16272	HVAEP1_G026992
chr-14	39719337	39722191	1545	206261	.	Downstream	14763	HVAEP1_G027038
chr-14	39858557	39859458	1546	126874	.	OverlapStart	318	HVAEP1_G027045
chr-14	40757891	40759727	1550	272509	.	Downstream	5886	HVAEP1_G027067
chr-14	41942721	41945032	1552	210710	.	Upstream	3817	HVAEP1_G027098
chr-14	43068162	43073640	1557	402939	.	Downstream	4587	HVAEP1_G027124
chr-15	329635	330691	1558	147400	.	Downstream	10263	HVAEP1_G027152
chr-15	1494024	1497698	1561	170252	.	Upstream	5494	HVAEP1_G027193
chr-15	1693131	1694142	1563	163536	.	OverlapStart	117	HVAEP1_G027197
chr-15	1899172	1900472	1565	256633	.	Upstream	6910	HVAEP1_G027206
chr-15	1922130	1922949	1566	218315	.	OverlapStart	208	HVAEP1_G027208
chr-15	2045068	2048858	1568	152476	.	Upstream	12538	HVAEP1_G027215
chr-15	2116740	2117617	1569	207568	.	OverlapStart	415	HVAEP1_G027217
chr-15	2415645	2417436	1570	506790	.	Upstream	7133	HVAEP1_G027227
chr-15	2421945	2423597	1571	184996	.	Upstream	902	HVAEP1_G027227
chr-15	2650123	2651712	1573	130031	.	Upstream	7465	HVAEP1_G027229
chr-15	3081940	3082633	1574	186297	.	OverlapStart	1	HVAEP1_G027246
chr-15	4008136	4008963	1577	205785	.	OverlapStart	411	HVAEP1_G027272
chr-15	4406760	4407830	1579	103423	.	Downstream	4965	HVAEP1_G027280
chr-15	4491750	4493417	1581	364062	.	Upstream	3090	HVAEP1_G027283
chr-15	4935458	4936638	1585	150498	.	OverlapStart	409	HVAEP1_G027297
chr-15	4983893	4985687	1586	308913	.	PeakInsideFeature	988	HVAEP1_G027298
chr-15	5005690	5007097	1587	113242	.	Upstream	5824	HVAEP1_G027299
chr-15	5832280	5834443	1591	142555	.	Downstream	2446	HVAEP1_G027334
chr-15	6193213	6194551	1592	91471	.	PeakInsideFeature	8672	HVAEP1_G027349
chr-15	6486381	6488955	1594	141021	.	FeatureInsidePeak	148	HVAEP1_G027357
chr-15	6609538	6611264	1595	279157	.	PeakInsideFeature	33966	HVAEP1_G027360
chr-15	6719790	6721512	1597	188270	.	Upstream	10833	HVAEP1_G027364
chr-15	7065591	7067122	1599	159210	.	OverlapStart	247	HVAEP1_G027379
chr-15	7244065	7245764	1602	93245	.	Upstream	15267	HVAEP1_G027382
chr-15	7428908	7430896	1605	108579	.	OverlapStart	656	HVAEP1_G027390
chr-15	7552346	7553892	1606	185685	.	OverlapStart	515	HVAEP1_G027393
chr-15	9634480	9635682	1609	270431	.	OverlapStart	587	HVAEP1_G027451
chr-15	10465328	10466367	1612	142549	.	PeakInsideFeature	61594	HVAEP1_G027480
chr-15	10556919	10558887	1613	127857	.	PeakInsideFeature	14919	HVAEP1_G027481
chr-15	10625419	10627068	1614	303511	.	PeakInsideFeature	12071	HVAEP1_G027482
chr-15	10871466	10872916	1615	200510	.	OverlapStart	478	HVAEP1_G027488
chr-15	11795108	11796730	1616	124152	.	OverlapStart	456	HVAEP1_G027512
chr-15	12041854	12043909	1617	301060	.	OverlapStart	49	HVAEP1_G027518
chr-15	12195551	12196290	1618	265127	.	OverlapStart	253	HVAEP1_G027521
chr-15	12223489	12225214	1619	112480	.	OverlapStart	425	HVAEP1_G027524
chr-15	13115267	13116285	1620	121240	.	PeakInsideFeature	15699	HVAEP1_G027555
chr-15	13605826	13607217	1621	142789	.	OverlapStart	475	HVAEP1_G027574
chr-15	14086373	14089121	1623	128104	.	OverlapStart	644	HVAEP1_G027585
chr-15	15409579	15410262	1625	225116	.	Upstream	1297	HVAEP1_G027626
chr-15	15441753	15443814	1626	345116	.	Upstream	10814	HVAEP1_G027624
chr-15	16045197	16046511	1627	281617	.	OverlapStart	652	HVAEP1_G027633
chr-15	16241396	16242185	1629	160088	.	PeakInsideFeature	470	HVAEP1_G027638
chr-15	16563629	16564916	1630	148622	.	OverlapStart	571	HVAEP1_G027649
chr-15	16870974	16872323	1631	144757	.	OverlapStart	536	HVAEP1_G027654
chr-15	17500990	17501844	1633	99002	.	Upstream	44643	HVAEP1_G027666
chr-15	18423517	18425016	1634	142937	.	PeakInsideFeature	3908	HVAEP1_G027696
chr-15	18669802	18671261	1635	159718	.	OverlapStart	110	HVAEP1_G027701
chr-15	19364856	19365562	1639	102645	.	Upstream	1385	HVAEP1_G027726
chr-15	19836237	19836894	1640	143899	.	OverlapStart	165	HVAEP1_G027741
chr-15	20103461	20105266	1641	236973	.	OverlapStart	225	HVAEP1_G027748
chr-15	20644479	20645044	1643	199301	.	Upstream	5626	HVAEP1_G027766
chr-15	21065209	21066444	1644	127211	.	OverlapStart	548	HVAEP1_G027778
chr-15	21512393	21513445	1646	129725	.	OverlapStart	51	HVAEP1_G027794
chr-15	21623280	21624888	1647	256494	.	OverlapStart	34	HVAEP1_G027798
chr-15	21986566	21987523	1649	109007	.	OverlapStart	254	HVAEP1_G027811
chr-15	22446739	22448144	1651	156687	.	Upstream	1575	HVAEP1_G027825
chr-15	22742702	22743854	1654	117711	.	Upstream	2700	HVAEP1_G027838
chr-15	22965920	22967490	1655	111677	.	OverlapStart	424	HVAEP1_G027851
chr-15	23087197	23089143	1656	100261	.	Downstream	21744	HVAEP1_G027859
chr-15	23256389	23258961	1657	349441	.	OverlapStart	527	HVAEP1_G027861
chr-15	24181351	24182863	1660	139303	.	Upstream	4191	HVAEP1_G027882
chr-15	24413738	24415190	1664	420533	.	FeatureInsidePeak	581	HVAEP1_G027894
chr-15	24427608	24428862	1666	186413	.	Upstream	13190	HVAEP1_G027894
chr-15	24461670	24463030	1667	218038	.	Downstream	10318	HVAEP1_G027896
chr-15	24481800	24483715	1668	154443	.	OverlapStart	258	HVAEP1_G027897
chr-15	24834930	24836512	1670	147840	.	OverlapStart	498	HVAEP1_G027912
chr-15	25451090	25452044	1674	165902	.	OverlapStart	105	HVAEP1_G027931
chr-15	26048853	26050084	1675	130640	.	OverlapStart	589	HVAEP1_G027948
chr-15	26191884	26193562	1676	135632	.	OverlapStart	223	HVAEP1_G027957
chr-15	26443549	26444458	1678	120779	.	Upstream	674	HVAEP1_G027961
chr-15	26539502	26541072	1679	119646	.	OverlapStart	392	HVAEP1_G027968
chr-15	26616027	26616971	1680	112107	.	Upstream	5579	HVAEP1_G027971
chr-15	26969340	26971054	1682	136382	.	OverlapStart	577	HVAEP1_G027984
chr-15	27286238	27288126	1684	175873	.	Downstream	2205	HVAEP1_G027991
chr-15	27345230	27346466	1685	127222	.	FeatureInsidePeak	184	HVAEP1_G027998
chr-15	27470180	27470919	1688	151013	.	PeakInsideFeature	6950	HVAEP1_G028004
chr-15	27712039	27713887	1689	162622	.	Upstream	3731	HVAEP1_G028016
chr-15	28675413	28676886	1690	121366	.	Downstream	1505	HVAEP1_G028031
chr-15	28728556	28729731	1691	119814	.	OverlapStart	215	HVAEP1_G028035
chr-15	30784922	30787038	1692	184807	.	OverlapStart	387	HVAEP1_G028086
chr-15	31132135	31133937	1693	170893	.	OverlapStart	420	HVAEP1_G028099
chr-15	31613268	31614587	1696	102845	.	FeatureInsidePeak	2	HVAEP1_G028119
chr-15	32509035	32510453	1698	124838	.	Upstream	1043	HVAEP1_G028146
chr-15	32658225	32661265	1699	282294	.	PeakInsideFeature	10101	HVAEP1_G028147
chr-15	34317934	34319274	1700	111269	.	OverlapEnd	45745	HVAEP1_G028185
chr-15	34623616	34624675	1701	92966	.	OverlapStart	440	HVAEP1_G028194
chr-15	34980830	34985167	1702	411344	.	OverlapStart	172	HVAEP1_G028200
chr-15	35835357	35837722	1704	256399	.	Downstream	40721	HVAEP1_G028231
chr-15	35848320	35850403	1705	122026	.	Downstream	53543	HVAEP1_G028231
chr-15	36689510	36690542	1707	191410	.	PeakInsideFeature	538	HVAEP1_G028257
chr-15	37686983	37688764	1709	154163	.	OverlapStart	836	HVAEP1_G028289
chr-15	39346195	39346911	1716	141833	.	OverlapStart	54	HVAEP1_G028343
chr-15	40153022	40153926	1720	111095	.	OverlapStart	135	HVAEP1_G028381
chr-15	40236940	40240270	1721	114371	.	FeatureInsidePeak	23	HVAEP1_G028388
chr-15	41027060	41029420	1722	200301	.	OverlapStart	198	HVAEP1_G028416
chr-15	41527231	41528985	1723	218049	.	OverlapStart	674	HVAEP1_G028434
chr-15	41607682	41610293	1724	254094	.	OverlapStart	54	HVAEP1_G028435
chr-15	42443364	42445287	1726	200201	.	OverlapStart	567	HVAEP1_G028467
chr-15	42606168	42607701	1728	117190	.	OverlapStart	303	HVAEP1_G028472
chr-15	42760683	42762426	1730	99694	.	Upstream	9117	HVAEP1_G028479
chr-15	42846327	42847538	1731	138768	.	OverlapStart	147	HVAEP1_G028482
chr-15	43211092	43212178	1733	271361	.	PeakInsideFeature	748	HVAEP1_G028498
chr-15	43272103	43273920	1734	134215	.	PeakInsideFeature	13131	HVAEP1_G028500
chr-15	43369799	43372269	1735	172481	.	OverlapStart	224	HVAEP1_G028502
chr-15	43429651	43430832	1736	109792	.	Upstream	4357	HVAEP1_G028506
chr-15	43725237	43726586	1738	211176	.	OverlapStart	581	HVAEP1_G028517
chr-15	43877778	43878656	1740	99343	.	Upstream	4289	HVAEP1_G028522
chr-15	43991892	43993830	1741	108093	.	Downstream	43734	HVAEP1_G028523
chr-15	44137750	44139074	1742	103955	.	FeatureInsidePeak	386	HVAEP1_G028529
chr-15	45262600	45264268	1746	118350	.	OverlapStart	121	HVAEP1_G028561
chr-15	45804572	45807039	1749	229899	.	FeatureInsidePeak	975	HVAEP1_G028578
chr-15	45828667	45831367	1750	140283	.	Downstream	25187	HVAEP1_G028578
chr-15	45904817	45906648	1752	131970	.	Upstream	2033	HVAEP1_G028584
chr-15	47033374	47034610	1755	216228	.	OverlapStart	317	HVAEP1_G028620
chr-15	47497938	47500076	1756	249881	.	OverlapStart	55	HVAEP1_G028631
chr-15	48563905	48564719	1757	160875	.	Upstream	1020	HVAEP1_G028672
chr-15	49779253	49780582	1758	279838	.	Upstream	4243	HVAEP1_G028719
chr-15	49920759	49923551	1759	195243	.	Downstream	13143	HVAEP1_G028725
chr-15	50025045	50027888	1760	298916	.	Downstream	34514	HVAEP1_G028730
chr-15	50197591	50198295	1761	236492	.	OverlapStart	40	HVAEP1_G028736
chr-15	50247069	50249085	1762	169872	.	Upstream	34781	HVAEP1_G028740
chr-15	50625433	50627950	1763	106583	.	Downstream	10865	HVAEP1_G028750
chr-15	51163298	51165608	1766	117268	.	Upstream	4013	HVAEP1_G028772
chr-15	51458926	51461471	1769	132369	.	Downstream	9601	HVAEP1_G028780
chr-15	51656848	51657925	1771	112726	.	Upstream	14302	HVAEP1_G028794
chr-15	51707559	51708386	1772	175797	.	OverlapStart	305	HVAEP1_G028797
chr-15	51717057	51718349	1773	109687	.	Upstream	9426	HVAEP1_G028797
chr-15	53485021	53486098	1775	176645	.	OverlapStart	475	HVAEP1_G028857
chr-15	53934378	53935588	1776	137154	.	Upstream	2066	HVAEP1_G028874
chr-15	55503878	55504936	1778	99988	.	OverlapStart	201	HVAEP1_G028909
chr-15	55817875	55819462	1779	286467	.	OverlapStart	604	HVAEP1_G028916
chr-2	114900	116709	1780	242979	.	OverlapStart	243	HVAEP1_G002668
chr-2	129604	130574	1781	131434	.	FeatureInsidePeak	241	HVAEP1_G002669
chr-2	149752	151592	1782	151833	.	OverlapStart	417	HVAEP1_G002670
chr-2	859097	860465	1784	161637	.	Downstream	27224	HVAEP1_G002684
chr-2	1590746	1591342	1786	125633	.	OverlapStart	5	HVAEP1_G002695
chr-2	2480898	2481952	1788	104608	.	Upstream	2083	HVAEP1_G002724
chr-2	2482367	2483962	1789	124962	.	Upstream	3822	HVAEP1_G002724
chr-2	3578782	3580502	1790	168382	.	OverlapStart	520	HVAEP1_G002746
chr-2	3761627	3762804	1792	115155	.	Upstream	4777	HVAEP1_G002750
chr-2	3853816	3854898	1793	129709	.	OverlapStart	146	HVAEP1_G002754
chr-2	5110312	5112760	1795	176793	.	Downstream	26008	HVAEP1_G002773
chr-2	6774134	6775349	1796	177558	.	Upstream	6235	HVAEP1_G002824
chr-2	8854519	8856327	1797	251351	.	FeatureInsidePeak	543	HVAEP1_G002884
chr-2	9474698	9475939	1798	186531	.	Upstream	6267	HVAEP1_G002902
chr-2	9912773	9914210	1800	188806	.	FeatureInsidePeak	271	HVAEP1_G002910
chr-2	12335018	12337092	1805	95022	.	OverlapStart	147	HVAEP1_G003021
chr-2	12585551	12587181	1806	93739	.	Upstream	23594	HVAEP1_G003032
chr-2	13091597	13093708	1809	270861	.	Upstream	1530	HVAEP1_G003043
chr-2	13196638	13200122	1810	219068	.	Downstream	14518	HVAEP1_G003048
chr-2	13948448	13948916	1811	120265	.	Upstream	15307	HVAEP1_G003064
chr-2	14056015	14058061	1812	106814	.	Upstream	1563	HVAEP1_G003068
chr-2	14205012	14206473	1813	163739	.	Upstream	12471	HVAEP1_G003074
chr-2	14382847	14384042	1815	158235	.	OverlapStart	83	HVAEP1_G003080
chr-2	15228531	15229900	1820	108740	.	Downstream	24030	HVAEP1_G003106
chr-2	17142381	17143305	1825	122413	.	Downstream	50862	HVAEP1_G003163
chr-2	17347297	17349100	1828	123865	.	Upstream	39820	HVAEP1_G003168
chr-2	17712187	17714395	1830	208730	.	Downstream	5910	HVAEP1_G003177
chr-2	18070569	18071308	1831	137225	.	OverlapStart	284	HVAEP1_G003190
chr-2	18234715	18235765	1834	195008	.	OverlapStart	354	HVAEP1_G003198
chr-2	18620776	18622618	1837	90642	.	Upstream	16764	HVAEP1_G003212
chr-2	18666492	18668139	1840	289105	.	Downstream	20285	HVAEP1_G003214
chr-2	18676476	18677601	1841	118011	.	Downstream	10562	HVAEP1_G003214
chr-2	19541266	19542868	1844	121231	.	PeakInsideFeature	10986	HVAEP1_G003234
chr-2	19617886	19620572	1845	249911	.	Upstream	7665	HVAEP1_G003236
chr-2	20045418	20047200	1849	116432	.	Downstream	5886	HVAEP1_G003259
chr-2	20316699	20319218	1855	170155	.	FeatureInsidePeak	227	HVAEP1_G003280
chr-2	20404572	20407847	1857	211795	.	OverlapStart	119	HVAEP1_G003284
chr-2	20457712	20459572	1860	378939	.	Upstream	2591	HVAEP1_G003288
chr-2	20472496	20474492	1861	364551	.	OverlapStart	263	HVAEP1_G003290
chr-2	20594177	20596227	1867	144531	.	OverlapStart	949	HVAEP1_G003303
chr-2	21229161	21230035	1870	110736	.	OverlapStart	420	HVAEP1_G003314
chr-2	21455681	21458066	1871	142122	.	Downstream	9572	HVAEP1_G003326
chr-2	22192428	22193697	1875	99408	.	Upstream	1518	HVAEP1_G003356
chr-2	22496696	22497431	1876	104215	.	PeakInsideFeature	446	HVAEP1_G003365
chr-2	22594546	22596571	1877	119583	.	Upstream	2622	HVAEP1_G003366
chr-2	23010092	23011979	1878	190357	.	PeakInsideFeature	19001	HVAEP1_G003374
chr-2	23195180	23196480	1879	125659	.	OverlapStart	535	HVAEP1_G003380
chr-2	23372994	23374097	1880	141442	.	Upstream	15183	HVAEP1_G003384
chr-2	25023451	25025061	1883	113635	.	PeakInsideFeature	3056	HVAEP1_G003432
chr-2	25585294	25586329	1885	141283	.	OverlapStart	207	HVAEP1_G003448
chr-2	27514911	27516440	1888	384026	.	Upstream	4279	HVAEP1_G003507
chr-2	27665881	27667649	1890	101124	.	OverlapStart	790	HVAEP1_G003516
chr-2	28394402	28395237	1891	212410	.	OverlapStart	179	HVAEP1_G003543
chr-2	28567981	28569771	1893	165158	.	OverlapStart	124	HVAEP1_G003549
chr-2	28835565	28837485	1895	91975	.	Upstream	11037	HVAEP1_G003559
chr-2	29293900	29295539	1896	149988	.	OverlapStart	511	HVAEP1_G003571
chr-2	30091632	30093221	1898	136043	.	Upstream	3290	HVAEP1_G003605
chr-2	30111213	30112892	1899	181673	.	OverlapStart	739	HVAEP1_G003606
chr-2	30426124	30427317	1900	125748	.	Upstream	647	HVAEP1_G003621
chr-2	31521784	31523206	1902	91865	.	OverlapStart	60	HVAEP1_G003654
chr-2	31648571	31650475	1903	177699	.	OverlapStart	17	HVAEP1_G003657
chr-2	31720050	31721220	1905	147263	.	OverlapStart	29	HVAEP1_G003658
chr-2	32454904	32456585	1909	111040	.	Upstream	10674	HVAEP1_G003676
chr-2	32701491	32707136	1911	256627	.	OverlapEnd	12155	HVAEP1_G003686
chr-2	32981173	32982749	1912	107183	.	OverlapStart	76	HVAEP1_G003693
chr-2	33633447	33635331	1916	245008	.	OverlapStart	796	HVAEP1_G003723
chr-2	33907030	33908127	1918	180623	.	Upstream	1728	HVAEP1_G003728
chr-2	34083830	34084789	1919	172247	.	OverlapStart	62	HVAEP1_G003737
chr-2	34582759	34583734	1921	138226	.	PeakInsideFeature	4473	HVAEP1_G003758
chr-2	34847861	34849031	1922	187174	.	OverlapStart	456	HVAEP1_G003768
chr-2	35011237	35014680	1923	269559	.	OverlapStart	335	HVAEP1_G003775
chr-2	35385944	35386909	1924	103575	.	Downstream	5029	HVAEP1_G003788
chr-2	35658974	35660773	1926	160673	.	Upstream	5073	HVAEP1_G003797
chr-2	36390938	36392730	1927	119224	.	OverlapStart	782	HVAEP1_G003819
chr-2	36463738	36465198	1928	154397	.	OverlapStart	106	HVAEP1_G003822
chr-2	36512819	36513572	1929	155180	.	Upstream	3806	HVAEP1_G003823
chr-2	36695493	36696904	1930	96205	.	FeatureInsidePeak	359	HVAEP1_G003828
chr-2	38274409	38276370	1933	139046	.	OverlapStart	875	HVAEP1_G003878
chr-2	38475061	38477272	1934	177153	.	OverlapStart	10	HVAEP1_G003884
chr-2	38712847	38715628	1935	106874	.	FeatureInsidePeak	550	HVAEP1_G003893
chr-2	39248573	39250188	1937	116521	.	Downstream	4707	HVAEP1_G003913
chr-2	39567069	39567762	1938	116400	.	Upstream	958	HVAEP1_G003930
chr-2	40831833	40833272	1941	256529	.	FeatureInsidePeak	351	HVAEP1_G003981
chr-2	41197689	41199858	1942	109828	.	Upstream	7852	HVAEP1_G003994
chr-2	41476008	41477224	1943	110604	.	OverlapStart	195	HVAEP1_G004000
chr-2	41605663	41607489	1945	96296	.	OverlapStart	249	HVAEP1_G004003
chr-2	41902689	41904289	1946	228285	.	OverlapStart	682	HVAEP1_G004012
chr-2	41998271	41999494	1948	117215	.	Upstream	3103	HVAEP1_G004016
chr-2	43312131	43313485	1951	170745	.	OverlapStart	452	HVAEP1_G004040
chr-2	43889242	43890297	1953	106224	.	PeakInsideFeature	1418	HVAEP1_G004057
chr-2	44053168	44054420	1954	125801	.	OverlapStart	150	HVAEP1_G004069
chr-2	44431403	44433009	1956	159671	.	PeakInsideFeature	1874	HVAEP1_G004084
chr-2	45065132	45066464	1958	328881	.	OverlapStart	308	HVAEP1_G004099
chr-2	45070556	45071443	1959	114626	.	Upstream	4893	HVAEP1_G004099
chr-2	45201809	45202941	1960	118916	.	FeatureInsidePeak	230	HVAEP1_G004102
chr-2	45330509	45331982	1961	103419	.	Downstream	8112	HVAEP1_G004109
chr-2	45625116	45626533	1963	101459	.	OverlapStart	397	HVAEP1_G004117
chr-2	45936106	45937328	1964	117292	.	OverlapStart	523	HVAEP1_G004132
chr-2	46041194	46042801	1965	152209	.	Upstream	9306	HVAEP1_G004138
chr-2	46051092	46052666	1966	156387	.	OverlapStart	576	HVAEP1_G004138
chr-2	46208076	46210861	1967	125527	.	PeakInsideFeature	14557	HVAEP1_G004140
chr-2	46433141	46433835	1969	85401	.	OverlapStart	283	HVAEP1_G004151
chr-2	46626754	46628314	1970	125288	.	OverlapStart	446	HVAEP1_G004156
chr-2	47157591	47159329	1971	138820	.	FeatureInsidePeak	414	HVAEP1_G004175
chr-2	47347065	47348894	1972	126047	.	OverlapStart	538	HVAEP1_G004185
chr-2	47388567	47389148	1973	123902	.	Downstream	14129	HVAEP1_G004188
chr-2	47542933	47544214	1974	205431	.	OverlapStart	289	HVAEP1_G004195
chr-2	48260392	48261803	1975	102886	.	OverlapStart	615	HVAEP1_G004220
chr-2	48559416	48560725	1978	152697	.	OverlapStart	197	HVAEP1_G004231
chr-2	48582747	48585341	1979	247310	.	OverlapStart	140	HVAEP1_G004232
chr-2	48954788	48956281	1982	208100	.	PeakInsideFeature	766	HVAEP1_G004244
chr-2	49120631	49121856	1983	121420	.	OverlapStart	234	HVAEP1_G004248
chr-2	49381361	49382251	1984	310082	.	Upstream	674	HVAEP1_G004259
chr-2	49473480	49474558	1986	113899	.	PeakInsideFeature	903	HVAEP1_G004262
chr-2	49667154	49668281	1988	210873	.	OverlapStart	435	HVAEP1_G004272
chr-2	49837925	49839282	1990	158713	.	OverlapStart	590	HVAEP1_G004276
chr-2	49982288	49984399	1991	163020	.	Upstream	10372	HVAEP1_G004279
chr-2	50173665	50174728	1992	212688	.	Upstream	1149	HVAEP1_G004282
chr-2	50421579	50422784	1995	104094	.	Downstream	7868	HVAEP1_G004293
chr-2	50482240	50483976	1996	196191	.	OverlapStart	286	HVAEP1_G004297
chr-2	50485061	50486246	1997	121260	.	OverlapStart	376	HVAEP1_G004298
chr-2	50559616	50560755	1998	175926	.	Downstream	27602	HVAEP1_G004301
chr-2	50843380	50844601	2000	196292	.	Downstream	7939	HVAEP1_G004313
chr-2	51090429	51091272	2001	156824	.	OverlapStart	328	HVAEP1_G004322
chr-2	51824673	51826034	2003	325761	.	OverlapStart	311	HVAEP1_G004341
chr-2	52427756	52428228	2007	124577	.	Upstream	44682	HVAEP1_G004366
chr-2	52656265	52658530	2008	252919	.	OverlapStart	150	HVAEP1_G004373
chr-2	53131115	53132686	2009	97385	.	OverlapStart	546	HVAEP1_G004393
chr-2	53589732	53591339	2010	161465	.	Upstream	1811	HVAEP1_G004432
chr-2	54335525	54337442	2011	111788	.	OverlapStart	514	HVAEP1_G004456
chr-2	54462534	54463526	2012	115048	.	OverlapStart	8	HVAEP1_G004460
chr-2	54477309	54478573	2013	126008	.	Downstream	14919	HVAEP1_G004460
chr-2	55473625	55474725	2016	117604	.	Downstream	20577	HVAEP1_G004490
chr-2	55494159	55495741	2017	108725	.	Downstream	6132	HVAEP1_G004491
chr-2	55551710	55552388	2018	96897	.	PeakInsideFeature	370	HVAEP1_G004495
chr-2	55789736	55790897	2021	119037	.	Upstream	11058	HVAEP1_G004503
chr-2	56078537	56080415	2022	93257	.	Upstream	1385	HVAEP1_G004510
chr-2	57574704	57576326	2024	230371	.	OverlapStart	612	HVAEP1_G004548
chr-2	59007890	59009895	2025	101131	.	Upstream	14333	HVAEP1_G004601
chr-2	59021659	59022259	2026	171287	.	Upstream	1266	HVAEP1_G004601
chr-2	59296939	59297683	2027	113617	.	PeakInsideFeature	15227	HVAEP1_G004603
chr-2	59916575	59918221	2031	90098	.	OverlapStart	691	HVAEP1_G004623
chr-2	60216298	60219396	2032	331225	.	OverlapStart	788	HVAEP1_G004632
chr-2	60809994	60810662	2033	120945	.	Upstream	656	HVAEP1_G004652
chr-2	61358262	61358836	2034	111390	.	Upstream	2696	HVAEP1_G004668
chr-2	63105810	63107352	2036	192518	.	Upstream	2600	HVAEP1_G004721
chr-2	63257217	63257904	2037	104431	.	OverlapStart	260	HVAEP1_G004724
chr-2	63480762	63482029	2038	99182	.	OverlapStart	529	HVAEP1_G004727
chr-2	64055120	64056277	2040	102022	.	OverlapStart	576	HVAEP1_G004754
chr-2	64140955	64141903	2041	131003	.	Downstream	32444	HVAEP1_G004756
chr-2	64369429	64370616	2042	104974	.	Upstream	1242	HVAEP1_G004767
chr-2	65107012	65108155	2044	186738	.	OverlapStart	272	HVAEP1_G004809
chr-2	65208442	65209513	2045	136883	.	Upstream	2689	HVAEP1_G004815
chr-2	65553954	65555272	2046	110387	.	OverlapStart	315	HVAEP1_G004820
chr-2	65728795	65730656	2047	155266	.	Downstream	22171	HVAEP1_G004824
chr-2	66227504	66228724	2050	107124	.	Upstream	805	HVAEP1_G004836
chr-2	67273579	67274994	2053	140613	.	PeakInsideFeature	18080	HVAEP1_G004859
chr-2	67455350	67456941	2055	134334	.	Upstream	5890	HVAEP1_G004865
chr-2	67477900	67479111	2056	115138	.	OverlapStart	562	HVAEP1_G004866
chr-2	69109718	69111757	2060	113519	.	FeatureInsidePeak	690	HVAEP1_G004916
chr-2	69324586	69325533	2063	275674	.	OverlapStart	210	HVAEP1_G004923
chr-2	69694591	69695573	2064	145245	.	PeakInsideFeature	1118	HVAEP1_G004927
chr-2	70172852	70174264	2065	129722	.	PeakInsideFeature	746	HVAEP1_G004947
chr-2	70782080	70784177	2067	180798	.	Downstream	42225	HVAEP1_G004965
chr-2	71552383	71554327	2068	147524	.	Upstream	15526	HVAEP1_G004984
chr-2	72555973	72557966	2071	725769	.	Upstream	18711	HVAEP1_G005008
chr-2	72802152	72804537	2073	454190	.	OverlapEnd	1541	HVAEP1_G005018
chr-2	72889296	72890232	2074	86797	.	OverlapStart	341	HVAEP1_G005025
chr-3	519399	520799	2080	246394	.	OverlapStart	325	HVAEP1_G005102
chr-3	1392573	1393963	2086	183148	.	OverlapStart	321	HVAEP1_G005137
chr-3	1983948	1986836	2089	155247	.	OverlapStart	857	HVAEP1_G005155
chr-3	2896563	2898055	2091	119967	.	Upstream	1181	HVAEP1_G005189
chr-3	3103286	3104557	2092	94500	.	OverlapStart	385	HVAEP1_G005195
chr-3	3121015	3121931	2094	103445	.	Upstream	6956	HVAEP1_G005196
chr-3	3127658	3129691	2095	105421	.	Upstream	14157	HVAEP1_G005196
chr-3	3457239	3458017	2096	116459	.	OverlapStart	64	HVAEP1_G005214
chr-3	3875057	3875646	2098	119562	.	Downstream	47312	HVAEP1_G005222
chr-3	5333580	5335066	2103	290036	.	OverlapStart	119	HVAEP1_G005254
chr-3	5471168	5472205	2104	182722	.	Downstream	52372	HVAEP1_G005257
chr-3	6427992	6429264	2108	151067	.	FeatureInsidePeak	318	HVAEP1_G005291
chr-3	6474392	6476208	2109	113016	.	OverlapStart	338	HVAEP1_G005294
chr-3	6622922	6624605	2110	197247	.	Upstream	29648	HVAEP1_G005298
chr-3	6963018	6965034	2111	98751	.	FeatureInsidePeak	356	HVAEP1_G005310
chr-3	7079547	7083254	2112	154894	.	Upstream	5886	HVAEP1_G005315
chr-3	8167203	8171914	2115	325356	.	OverlapEnd	3338	HVAEP1_G005359
chr-3	8175529	8178824	2116	265609	.	Upstream	2317	HVAEP1_G005360
chr-3	9221605	9223439	2120	139590	.	OverlapStart	848	HVAEP1_G005407
chr-3	9363000	9365216	2121	129274	.	Upstream	13327	HVAEP1_G005412
chr-3	9962223	9963511	2123	117810	.	OverlapStart	241	HVAEP1_G005431
chr-3	10030339	10032756	2124	106796	.	PeakInsideFeature	6606	HVAEP1_G005434
chr-3	10160176	10161558	2125	175682	.	Upstream	15341	HVAEP1_G005436
chr-3	10769806	10771200	2127	300328	.	Downstream	10718	HVAEP1_G005452
chr-3	11089718	11091310	2128	119212	.	Upstream	4878	HVAEP1_G005470
chr-3	11171624	11172954	2129	137083	.	OverlapStart	517	HVAEP1_G005473
chr-3	11370608	11371698	2130	182763	.	OverlapStart	456	HVAEP1_G005480
chr-3	11584754	11587194	2131	284310	.	OverlapStart	243	HVAEP1_G005486
chr-3	11853299	11854750	2133	127215	.	Upstream	1066	HVAEP1_G005500
chr-3	12133341	12134663	2135	543496	.	Upstream	1275	HVAEP1_G005511
chr-3	12142346	12143442	2136	536692	.	OverlapStart	474	HVAEP1_G005512
chr-3	12990651	12991838	2140	155784	.	Upstream	762	HVAEP1_G005538
chr-3	13618535	13619441	2143	94105	.	PeakInsideFeature	996	HVAEP1_G005553
chr-3	13692762	13694577	2144	175479	.	OverlapStart	655	HVAEP1_G005556
chr-3	14606674	14610007	2146	334627	.	FeatureInsidePeak	212	HVAEP1_G005592
chr-3	15080799	15082396	2148	275393	.	OverlapStart	605	HVAEP1_G005612
chr-3	15386360	15386726	2150	94486	.	OverlapStart	97	HVAEP1_G005619
chr-3	15434053	15436236	2151	156044	.	OverlapStart	415	HVAEP1_G005623
chr-3	16158000	16159314	2153	137662	.	OverlapStart	319	HVAEP1_G005647
chr-3	16299150	16300486	2154	142878	.	OverlapStart	539	HVAEP1_G005652
chr-3	16976526	16977393	2155	85880	.	OverlapStart	68	HVAEP1_G005670
chr-3	17324849	17326762	2159	130612	.	Downstream	4179	HVAEP1_G005684
chr-3	17333457	17334784	2160	125531	.	OverlapStart	512	HVAEP1_G005685
chr-3	17494690	17495537	2162	193773	.	Upstream	1300	HVAEP1_G005694
chr-3	17667709	17671779	2163	464902	.	Upstream	13031	HVAEP1_G005699
chr-3	18008296	18009306	2164	271695	.	OverlapStart	196	HVAEP1_G005714
chr-3	18373233	18374125	2165	212341	.	OverlapStart	68	HVAEP1_G005727
chr-3	18600517	18602990	2166	383781	.	PeakInsideFeature	5734	HVAEP1_G005735
chr-3	19004580	19005114	2168	182131	.	OverlapStart	188	HVAEP1_G005749
chr-3	19075709	19078488	2169	103878	.	OverlapStart	1164	HVAEP1_G005754
chr-3	19391559	19393260	2170	182454	.	OverlapStart	488	HVAEP1_G005766
chr-3	20903659	20904508	2175	116849	.	OverlapStart	214	HVAEP1_G005820
chr-3	22102986	22104654	2179	159817	.	OverlapStart	537	HVAEP1_G005854
chr-3	22111051	22111752	2180	99767	.	OverlapStart	249	HVAEP1_G005855
chr-3	22260665	22262055	2181	118302	.	Upstream	7866	HVAEP1_G005858
chr-3	22533578	22534145	2184	115293	.	Upstream	857	HVAEP1_G005866
chr-3	22959168	22961407	2186	189810	.	OverlapStart	498	HVAEP1_G005883
chr-3	23053310	23055148	2187	133423	.	OverlapStart	469	HVAEP1_G005886
chr-3	23090399	23091311	2188	88390	.	OverlapStart	168	HVAEP1_G005887
chr-3	23759609	23761114	2189	196852	.	Upstream	1405	HVAEP1_G005901
chr-3	24054161	24055520	2190	189892	.	OverlapStart	278	HVAEP1_G005906
chr-3	24412482	24413361	2192	128101	.	OverlapStart	184	HVAEP1_G005917
chr-3	26455857	26457062	2195	155323	.	OverlapStart	591	HVAEP1_G005985
chr-3	26677692	26680327	2197	163334	.	Upstream	15453	HVAEP1_G005996
chr-3	26693713	26696706	2198	244320	.	FeatureInsidePeak	110	HVAEP1_G005997
chr-3	26759585	26761480	2199	117352	.	Upstream	1166	HVAEP1_G005999
chr-3	27438751	27440031	2202	90313	.	Downstream	6841	HVAEP1_G006019
chr-3	27476996	27478414	2203	155881	.	OverlapStart	295	HVAEP1_G006021
chr-3	28093995	28094900	2207	96326	.	OverlapStart	264	HVAEP1_G006049
chr-3	28199655	28200921	2208	113483	.	Upstream	7478	HVAEP1_G006051
chr-3	28207673	28208904	2209	133479	.	OverlapStart	522	HVAEP1_G006051
chr-3	28734841	28736798	2210	170909	.	Upstream	3922	HVAEP1_G006074
chr-3	29514960	29515751	2213	191505	.	OverlapStart	330	HVAEP1_G006085
chr-3	30356882	30358353	2216	140019	.	FeatureInsidePeak	352	HVAEP1_G006101
chr-3	30644539	30645452	2219	99181	.	Upstream	1472	HVAEP1_G006110
chr-3	31056236	31057183	2221	118236	.	OverlapStart	321	HVAEP1_G006121
chr-3	31201547	31203084	2222	107196	.	OverlapStart	663	HVAEP1_G006128
chr-3	31425741	31427431	2224	92995	.	OverlapStart	589	HVAEP1_G006134
chr-3	31696646	31697205	2225	102476	.	OverlapStart	22	HVAEP1_G006141
chr-3	32411946	32413832	2226	194998	.	OverlapStart	783	HVAEP1_G006171
chr-3	32668821	32670389	2227	114660	.	OverlapStart	426	HVAEP1_G006179
chr-3	33626936	33629119	2231	118022	.	PeakInsideFeature	3027	HVAEP1_G006206
chr-3	34025835	34027522	2233	172327	.	OverlapStart	834	HVAEP1_G006224
chr-3	34690793	34693152	2235	198713	.	PeakInsideFeature	11873	HVAEP1_G006243
chr-3	35518510	35519462	2237	156582	.	Upstream	597	HVAEP1_G006271
chr-3	35717929	35718619	2238	99519	.	OverlapStart	228	HVAEP1_G006281
chr-3	35899227	35900476	2239	94015	.	OverlapStart	61	HVAEP1_G006287
chr-3	36547272	36548491	2240	221794	.	PeakInsideFeature	25687	HVAEP1_G006300
chr-3	37464677	37467095	2244	112481	.	OverlapStart	794	HVAEP1_G006321
chr-3	38288680	38289744	2246	167924	.	OverlapStart	175	HVAEP1_G006339
chr-3	39733000	39734378	2250	231574	.	OverlapStart	289	HVAEP1_G006390
chr-3	40351940	40353295	2252	111248	.	Upstream	15681	HVAEP1_G006409
chr-3	40690678	40693276	2253	181483	.	Downstream	15713	HVAEP1_G006416
chr-3	41056073	41057544	2255	120730	.	OverlapStart	530	HVAEP1_G006431
chr-3	42170457	42172761	2258	281404	.	OverlapStart	250	HVAEP1_G006469
chr-3	42496237	42498173	2260	111626	.	OverlapStart	766	HVAEP1_G006486
chr-3	43297953	43299526	2263	232122	.	FeatureInsidePeak	376	HVAEP1_G006507
chr-3	43379138	43380863	2264	103426	.	Upstream	7464	HVAEP1_G006511
chr-3	43605328	43606633	2265	166689	.	OverlapStart	353	HVAEP1_G006518
chr-3	43912489	43914072	2266	261986	.	FeatureInsidePeak	165	HVAEP1_G006533
chr-3	44018942	44020758	2267	215896	.	Upstream	3881	HVAEP1_G006541
chr-3	44263263	44264213	2269	103050	.	OverlapStart	121	HVAEP1_G006550
chr-3	45418233	45419113	2272	178702	.	Upstream	2681	HVAEP1_G006573
chr-3	45933296	45934031	2278	105910	.	FeatureInsidePeak	308	HVAEP1_G006598
chr-3	46025356	46026401	2279	180367	.	OverlapStart	200	HVAEP1_G006605
chr-3	46268509	46269895	2280	153274	.	PeakInsideFeature	11382	HVAEP1_G006610
chr-3	46297108	46298448	2281	159614	.	OverlapStart	410	HVAEP1_G006611
chr-3	46358919	46360626	2282	101148	.	OverlapStart	821	HVAEP1_G006615
chr-3	46447759	46448999	2283	150537	.	PeakInsideFeature	7036	HVAEP1_G006618
chr-3	46591372	46593600	2284	295654	.	FeatureInsidePeak	930	HVAEP1_G006627
chr-3	46617861	46619101	2285	156050	.	OverlapStart	220	HVAEP1_G006629
chr-3	47807194	47808996	2291	162523	.	FeatureInsidePeak	527	HVAEP1_G006671
chr-3	48054115	48055137	2292	299626	.	Upstream	1249	HVAEP1_G006675
chr-3	48327744	48329399	2294	115199	.	Upstream	5500	HVAEP1_G006686
chr-3	49034104	49035256	2295	153762	.	Upstream	10250	HVAEP1_G006707
chr-3	49036577	49040047	2296	163924	.	Upstream	13882	HVAEP1_G006707
chr-3	49877452	49879305	2299	311376	.	OverlapStart	363	HVAEP1_G006728
chr-3	51182498	51184348	2302	192487	.	OverlapStart	644	HVAEP1_G006761
chr-3	51460258	51461231	2303	269518	.	OverlapStart	344	HVAEP1_G006772
chr-3	53151455	53153402	2306	148058	.	Upstream	12792	HVAEP1_G006814
chr-3	53750215	53753017	2308	199270	.	OverlapStart	708	HVAEP1_G006830
chr-3	54331071	54332899	2310	125247	.	Downstream	7215	HVAEP1_G006848
chr-3	54514484	54517485	2312	101887	.	Upstream	2795	HVAEP1_G006852
chr-3	56436684	56438735	2316	95470	.	Upstream	3518	HVAEP1_G006918
chr-3	57220017	57221263	2317	158949	.	OverlapStart	286	HVAEP1_G006934
chr-3	57263051	57263704	2318	98081	.	OverlapStart	263	HVAEP1_G006935
chr-3	57361894	57363807	2319	118852	.	OverlapStart	263	HVAEP1_G006938
chr-3	58494096	58495343	2321	169377	.	Upstream	3747	HVAEP1_G006969
chr-3	58563821	58565159	2322	230652	.	OverlapStart	600	HVAEP1_G006971
chr-3	58677615	58679276	2323	224173	.	OverlapStart	726	HVAEP1_G006973
chr-3	59331236	59333950	2326	193780	.	Upstream	2348	HVAEP1_G006998
chr-3	59661873	59663802	2328	305503	.	Upstream	2150	HVAEP1_G007008
chr-3	59706817	59708496	2329	103327	.	Upstream	6321	HVAEP1_G007011
chr-3	60076114	60078655	2331	265263	.	OverlapEnd	2621	HVAEP1_G007030
chr-3	60707393	60709195	2333	130271	.	PeakInsideFeature	9399	HVAEP1_G007051
chr-3	61201282	61204881	2334	510024	.	Downstream	19143	HVAEP1_G007070
chr-3	61596366	61597997	2335	308404	.	Upstream	4502	HVAEP1_G007085
chr-3	61678131	61680216	2336	193519	.	OverlapStart	249	HVAEP1_G007087
chr-3	61980654	61983238	2339	223694	.	Upstream	12042	HVAEP1_G007102
chr-3	61993181	61993837	2340	131920	.	Upstream	479	HVAEP1_G007102
chr-3	62570859	62572370	2341	105401	.	OverlapStart	99	HVAEP1_G007117
chr-3	62827940	62829239	2342	145659	.	OverlapStart	19	HVAEP1_G007123
chr-3	63870942	63872051	2345	161327	.	PeakInsideFeature	610	HVAEP1_G007154
chr-3	64066165	64067106	2346	102604	.	OverlapStart	297	HVAEP1_G007159
chr-3	64286896	64289403	2347	689223	.	FeatureInsidePeak	867	HVAEP1_G007165
chr-3	64436077	64439842	2348	625177	.	FeatureInsidePeak	486	HVAEP1_G007172
chr-3	64977564	64978578	2351	193336	.	Upstream	1359	HVAEP1_G007198
chr-3	64994070	64995288	2352	99257	.	OverlapStart	418	HVAEP1_G007200
chr-3	65267872	65269010	2354	99655	.	OverlapStart	412	HVAEP1_G007204
chr-3	65359477	65361243	2355	186556	.	OverlapStart	372	HVAEP1_G007206
chr-3	65499621	65500289	2356	92159	.	Downstream	9157	HVAEP1_G007210
chr-3	65514993	65516087	2357	86793	.	OverlapStart	206	HVAEP1_G007213
chr-3	66800341	66801590	2359	236331	.	PeakInsideFeature	12089	HVAEP1_G007236
chr-3	66811338	66812731	2360	138448	.	PeakInsideFeature	1020	HVAEP1_G007236
chr-3	66943575	66945743	2362	122022	.	Upstream	2745	HVAEP1_G007243
chr-3	68116151	68118457	2364	107149	.	PeakInsideFeature	30067	HVAEP1_G007262
chr-3	68459165	68460509	2366	110359	.	OverlapStart	331	HVAEP1_G007271
chr-3	68784555	68785796	2368	293227	.	OverlapStart	562	HVAEP1_G007280
chr-3	68978659	68979801	2369	238922	.	Upstream	1063	HVAEP1_G007290
chr-3	69061397	69062751	2370	135906	.	Upstream	2947	HVAEP1_G007296
chr-3	69514289	69515906	2371	264261	.	Downstream	17315	HVAEP1_G007307
chr-3	69690636	69694008	2372	941128	.	Upstream	2609	HVAEP1_G007323
chr-4	331815	332747	2374	285004	.	NA	NA	NA
chr-4	1833839	1836109	2382	146496	.	Downstream	18618	HVAEP1_G007383
chr-4	3254287	3255791	2383	239720	.	Upstream	1683	HVAEP1_G007409
chr-4	3360496	3362431	2384	171013	.	FeatureInsidePeak	821	HVAEP1_G007414
chr-4	4106412	4108286	2388	122233	.	Upstream	2725	HVAEP1_G007442
chr-4	4785793	4787684	2389	101447	.	PeakInsideFeature	4341	HVAEP1_G007461
chr-4	5015619	5016307	2391	134206	.	OverlapStart	228	HVAEP1_G007470
chr-4	6667334	6668337	2395	112572	.	Upstream	1895	HVAEP1_G007534
chr-4	6775376	6777010	2396	116964	.	OverlapStart	35	HVAEP1_G007541
chr-4	7045477	7046564	2398	132337	.	OverlapStart	312	HVAEP1_G007548
chr-4	8896120	8897495	2402	257794	.	OverlapStart	643	HVAEP1_G007593
chr-4	9869209	9873499	2405	496819	.	Downstream	29374	HVAEP1_G007625
chr-4	9899149	9901237	2406	210198	.	OverlapStart	535	HVAEP1_G007625
chr-4	9948698	9950566	2407	102544	.	Downstream	30954	HVAEP1_G007626
chr-4	10120729	10122851	2409	172009	.	Upstream	8871	HVAEP1_G007630
chr-4	10156429	10157982	2410	216465	.	Upstream	1191	HVAEP1_G007631
chr-4	10421037	10424146	2412	303972	.	Upstream	3069	HVAEP1_G007637
chr-4	10950083	10951460	2413	267246	.	OverlapStart	54	HVAEP1_G007664
chr-4	11039112	11040664	2414	95569	.	PeakInsideFeature	1856	HVAEP1_G007670
chr-4	11287748	11290091	2415	154509	.	FeatureInsidePeak	246	HVAEP1_G007680
chr-4	12217896	12220395	2416	105457	.	Upstream	2508	HVAEP1_G007712
chr-4	12784024	12786011	2417	128962	.	FeatureInsidePeak	465	HVAEP1_G007741
chr-4	13621503	13623281	2418	119070	.	PeakInsideFeature	932	HVAEP1_G007768
chr-4	13673190	13675030	2419	134781	.	FeatureInsidePeak	639	HVAEP1_G007769
chr-4	13703398	13705303	2420	148207	.	OverlapStart	877	HVAEP1_G007773
chr-4	13726261	13728302	2421	178437	.	Upstream	1590	HVAEP1_G007774
chr-4	13767067	13769225	2422	290786	.	OverlapStart	46	HVAEP1_G007778
chr-4	14787136	14788532	2427	166816	.	OverlapStart	447	HVAEP1_G007804
chr-4	14812319	14813763	2428	106889	.	OverlapStart	341	HVAEP1_G007805
chr-4	15963306	15966537	2430	277349	.	FeatureInsidePeak	43	HVAEP1_G007843
chr-4	16157440	16158785	2431	125764	.	PeakInsideFeature	975	HVAEP1_G007855
chr-4	16240753	16243114	2432	100514	.	OverlapStart	524	HVAEP1_G007862
chr-4	16520802	16522146	2433	98653	.	PeakInsideFeature	4382	HVAEP1_G007876
chr-4	17259550	17262988	2435	170213	.	OverlapStart	580	HVAEP1_G007908
chr-4	17457202	17458367	2436	149086	.	Upstream	8491	HVAEP1_G007916
chr-4	18454966	18457487	2438	116145	.	Downstream	11774	HVAEP1_G007948
chr-4	18694731	18696753	2439	97388	.	FeatureInsidePeak	835	HVAEP1_G007954
chr-4	18857646	18859103	2440	184165	.	PeakInsideFeature	7517	HVAEP1_G007958
chr-4	18985563	18987213	2441	100970	.	PeakInsideFeature	999	HVAEP1_G007962
chr-4	20107149	20108061	2443	109317	.	OverlapStart	418	HVAEP1_G008005
chr-4	20490806	20494067	2445	303103	.	OverlapStart	627	HVAEP1_G008023
chr-4	20617112	20619775	2446	200302	.	OverlapStart	145	HVAEP1_G008029
chr-4	20644665	20647325	2447	106177	.	OverlapStart	841	HVAEP1_G008031
chr-4	21048868	21050992	2450	118021	.	Upstream	5335	HVAEP1_G008050
chr-4	21071146	21072459	2451	110417	.	Upstream	27207	HVAEP1_G008050
chr-4	23095139	23096369	2454	202379	.	Upstream	49186	HVAEP1_G008103
chr-4	23995796	23996473	2455	106868	.	Upstream	2329	HVAEP1_G008126
chr-4	24586696	24587647	2457	266357	.	OverlapStart	5	HVAEP1_G008144
chr-4	25583751	25585920	2459	103198	.	PeakInsideFeature	14337	HVAEP1_G008170
chr-4	25667429	25668858	2460	143012	.	PeakInsideFeature	15037	HVAEP1_G008172
chr-4	25705073	25706690	2461	92751	.	OverlapStart	706	HVAEP1_G008174
chr-4	26728776	26730592	2463	93124	.	Upstream	3429	HVAEP1_G008217
chr-4	27091415	27092880	2465	144115	.	OverlapStart	415	HVAEP1_G008227
chr-4	27519150	27520525	2467	105706	.	Upstream	13529	HVAEP1_G008243
chr-4	27683328	27684272	2468	134126	.	PeakInsideFeature	17557	HVAEP1_G008248
chr-4	27845391	27845935	2469	178127	.	OverlapStart	126	HVAEP1_G008251
chr-4	27971188	27973782	2471	154204	.	Downstream	3141	HVAEP1_G008256
chr-4	28334292	28335693	2472	124960	.	Upstream	14312	HVAEP1_G008268
chr-4	28647029	28650351	2473	101850	.	OverlapStart	534	HVAEP1_G008272
chr-4	29245442	29248608	2475	375391	.	Upstream	4517	HVAEP1_G008289
chr-4	29373129	29374524	2476	141328	.	OverlapStart	488	HVAEP1_G008292
chr-4	30181426	30181925	2481	122492	.	OverlapStart	98	HVAEP1_G008312
chr-4	30905608	30906906	2484	100837	.	OverlapStart	428	HVAEP1_G008339
chr-4	30991937	30994083	2485	576619	.	OverlapStart	395	HVAEP1_G008342
chr-4	31135296	31137186	2486	166210	.	OverlapStart	791	HVAEP1_G008344
chr-4	31434874	31436504	2488	131390	.	OverlapStart	199	HVAEP1_G008360
chr-4	31681879	31683490	2491	181645	.	PeakInsideFeature	903	HVAEP1_G008369
chr-4	32120116	32120828	2492	124626	.	OverlapStart	277	HVAEP1_G008381
chr-4	32404642	32405649	2493	139136	.	OverlapStart	437	HVAEP1_G008390
chr-4	33293789	33295521	2495	183311	.	FeatureInsidePeak	544	HVAEP1_G008418
chr-4	33649749	33651239	2497	140436	.	OverlapStart	468	HVAEP1_G008434
chr-4	33713211	33715056	2498	176025	.	OverlapStart	130	HVAEP1_G008435
chr-4	33858819	33860471	2499	225457	.	Upstream	12379	HVAEP1_G008441
chr-4	34464773	34465758	2501	102146	.	Upstream	3225	HVAEP1_G008456
chr-4	34525019	34525999	2502	97660	.	OverlapStart	248	HVAEP1_G008459
chr-4	37688379	37688878	2506	122145	.	Upstream	1839	HVAEP1_G008569
chr-4	40276649	40277998	2510	93357	.	OverlapStart	158	HVAEP1_G008645
chr-4	40737069	40738660	2511	217496	.	OverlapStart	422	HVAEP1_G008651
chr-4	41135039	41136025	2513	141461	.	Downstream	11479	HVAEP1_G008665
chr-4	41211332	41215822	2514	220454	.	Downstream	16912	HVAEP1_G008672
chr-4	41780080	41782797	2515	463560	.	Upstream	1822	HVAEP1_G008688
chr-4	42177823	42178735	2518	243497	.	OverlapStart	25	HVAEP1_G008703
chr-4	42453190	42456551	2519	214518	.	Downstream	17562	HVAEP1_G008712
chr-4	42727987	42729885	2520	187912	.	Downstream	2985	HVAEP1_G008717
chr-4	43688665	43690818	2525	615660	.	OverlapStart	444	HVAEP1_G008749
chr-4	43960823	43962242	2527	665708	.	FeatureInsidePeak	570	HVAEP1_G008756
chr-4	44508945	44510645	2529	100533	.	Upstream	4276	HVAEP1_G008779
chr-4	45222778	45224400	2531	131348	.	PeakInsideFeature	4161	HVAEP1_G008808
chr-4	45972913	45974365	2532	170811	.	FeatureInsidePeak	258	HVAEP1_G008838
chr-4	46235277	46236611	2533	108463	.	OverlapStart	247	HVAEP1_G008844
chr-4	46242336	46243104	2534	274286	.	Upstream	6529	HVAEP1_G008844
chr-4	47134543	47135937	2536	120569	.	OverlapStart	584	HVAEP1_G008870
chr-4	47366584	47368891	2537	256441	.	FeatureInsidePeak	726	HVAEP1_G008884
chr-4	47731908	47733267	2538	89296	.	Downstream	4729	HVAEP1_G008896
chr-4	47735920	47737554	2539	111302	.	FeatureInsidePeak	579	HVAEP1_G008896
chr-4	47778761	47779314	2540	123262	.	OverlapStart	117	HVAEP1_G008897
chr-4	47976819	47977963	2541	96131	.	OverlapStart	72	HVAEP1_G008907
chr-4	48013334	48014915	2542	189821	.	PeakInsideFeature	36805	HVAEP1_G008907
chr-4	48601746	48603243	2544	192653	.	OverlapStart	455	HVAEP1_G008918
chr-4	48736867	48738238	2546	158466	.	Upstream	1968	HVAEP1_G008927
chr-4	49485772	49487919	2548	137121	.	OverlapStart	129	HVAEP1_G008954
chr-4	49852478	49854862	2549	153343	.	Upstream	3068	HVAEP1_G008975
chr-4	50274225	50275458	2553	183055	.	OverlapStart	46	HVAEP1_G008984
chr-4	50564130	50566880	2555	245223	.	Upstream	2617	HVAEP1_G008994
chr-4	50752910	50754324	2556	137547	.	PeakInsideFeature	22620	HVAEP1_G009008
chr-4	51045943	51048944	2557	177075	.	Downstream	12055	HVAEP1_G009014
chr-4	51438700	51439830	2558	183319	.	OverlapStart	205	HVAEP1_G009025
chr-4	52048475	52050605	2560	157510	.	Upstream	4737	HVAEP1_G009041
chr-5	773590	777165	2564	193254	.	Downstream	3389	HVAEP1_G009116
chr-5	2059516	2061672	2566	138502	.	PeakInsideFeature	10227	HVAEP1_G009156
chr-5	2448754	2450967	2568	94428	.	OverlapStart	202	HVAEP1_G009168
chr-5	2588247	2589466	2569	218105	.	OverlapStart	490	HVAEP1_G009174
chr-5	3559816	3561828	2573	180400	.	Upstream	2350	HVAEP1_G009204
chr-5	3639467	3642497	2574	121959	.	Upstream	2415	HVAEP1_G009208
chr-5	4053010	4055174	2576	194989	.	PeakInsideFeature	4903	HVAEP1_G009226
chr-5	4111294	4112783	2577	85143	.	Upstream	5434	HVAEP1_G009232
chr-5	4326549	4328149	2578	153817	.	OverlapStart	195	HVAEP1_G009246
chr-5	4443462	4447210	2579	160238	.	Upstream	3495	HVAEP1_G009250
chr-5	4616989	4619824	2580	119567	.	OverlapStart	100	HVAEP1_G009255
chr-5	4985907	4987048	2581	109484	.	PeakInsideFeature	9631	HVAEP1_G009264
chr-5	5584691	5587487	2582	185684	.	Downstream	24839	HVAEP1_G009278
chr-5	5958794	5960089	2584	113634	.	OverlapStart	525	HVAEP1_G009287
chr-5	6583547	6587901	2586	326671	.	Downstream	12122	HVAEP1_G009306
chr-5	7455483	7457947	2589	391368	.	PeakInsideFeature	19941	HVAEP1_G009335
chr-5	7867249	7869170	2590	143659	.	Downstream	12303	HVAEP1_G009347
chr-5	8595906	8596505	2593	110238	.	OverlapStart	249	HVAEP1_G009366
chr-5	9040627	9041926	2595	94384	.	OverlapStart	437	HVAEP1_G009380
chr-5	9276312	9277408	2596	98859	.	OverlapStart	367	HVAEP1_G009387
chr-5	9904319	9905835	2597	128115	.	PeakInsideFeature	838	HVAEP1_G009412
chr-5	10072787	10074777	2598	138281	.	OverlapStart	221	HVAEP1_G009416
chr-5	10152431	10153815	2600	174239	.	OverlapEnd	777	HVAEP1_G009417
chr-5	10168544	10169986	2601	306382	.	Upstream	15365	HVAEP1_G009417
chr-5	11182644	11184723	2605	186237	.	OverlapStart	196	HVAEP1_G009450
chr-5	11659957	11660675	2607	89335	.	OverlapStart	228	HVAEP1_G009471
chr-5	11771117	11772895	2608	241208	.	Upstream	2146	HVAEP1_G009477
chr-5	11818562	11820971	2610	368493	.	Upstream	2508	HVAEP1_G009481
chr-5	12242226	12243612	2613	251220	.	OverlapStart	9	HVAEP1_G009509
chr-5	12296638	12298121	2614	211530	.	OverlapStart	393	HVAEP1_G009511
chr-5	13067924	13069247	2617	145010	.	OverlapStart	508	HVAEP1_G009535
chr-5	13435199	13437444	2618	143217	.	OverlapStart	592	HVAEP1_G009544
chr-5	13445991	13447471	2619	112956	.	Downstream	11002	HVAEP1_G009544
chr-5	13469960	13472023	2620	111287	.	OverlapStart	925	HVAEP1_G009545
chr-5	13811263	13811965	2621	320417	.	Downstream	11428	HVAEP1_G009550
chr-5	13821795	13823458	2622	395109	.	OverlapStart	416	HVAEP1_G009550
chr-5	13848139	13849889	2623	144501	.	OverlapStart	494	HVAEP1_G009551
chr-5	13973813	13975610	2624	132071	.	OverlapStart	21	HVAEP1_G009553
chr-5	15041151	15042424	2626	114937	.	OverlapStart	68	HVAEP1_G009589
chr-5	15132102	15132936	2627	117491	.	OverlapEnd	429	HVAEP1_G009590
chr-5	18229317	18230626	2628	91412	.	OverlapStart	449	HVAEP1_G009681
chr-5	18658863	18659978	2629	141386	.	Upstream	1136	HVAEP1_G009689
chr-5	18929862	18932197	2630	202105	.	OverlapStart	338	HVAEP1_G009700
chr-5	20267776	20268779	2632	92191	.	OverlapStart	41	HVAEP1_G009725
chr-5	22722823	22724528	2634	121019	.	Upstream	1878	HVAEP1_G009782
chr-5	22925443	22928257	2635	146021	.	Upstream	11130	HVAEP1_G009790
chr-5	24309348	24310661	2638	213444	.	Upstream	1124	HVAEP1_G009828
chr-5	25062754	25064062	2641	150541	.	OverlapStart	404	HVAEP1_G009860
chr-5	25209870	25211898	2643	158748	.	Downstream	7802	HVAEP1_G009866
chr-5	25583788	25585317	2644	131088	.	PeakInsideFeature	12132	HVAEP1_G009884
chr-5	26671013	26672083	2648	140893	.	OverlapStart	254	HVAEP1_G009907
chr-5	26885842	26886695	2649	107325	.	PeakInsideFeature	802	HVAEP1_G009916
chr-5	27933286	27934264	2650	159695	.	OverlapStart	298	HVAEP1_G009937
chr-5	28102716	28104506	2651	124392	.	OverlapStart	571	HVAEP1_G009940
chr-5	28637384	28638388	2652	109843	.	Upstream	1551	HVAEP1_G009948
chr-5	28702393	28703642	2653	97119	.	OverlapStart	315	HVAEP1_G009952
chr-5	29104832	29107560	2654	188958	.	OverlapStart	177	HVAEP1_G009960
chr-5	29686014	29688265	2656	105951	.	FeatureInsidePeak	115	HVAEP1_G009974
chr-5	29786794	29788591	2657	123803	.	OverlapStart	421	HVAEP1_G009978
chr-5	31401373	31403976	2661	225358	.	PeakInsideFeature	5733	HVAEP1_G010017
chr-5	31526322	31527673	2662	143482	.	OverlapStart	45	HVAEP1_G010022
chr-5	32453785	32457112	2665	270985	.	FeatureInsidePeak	178	HVAEP1_G010053
chr-5	34095352	34097795	2667	125507	.	OverlapStart	1154	HVAEP1_G010103
chr-5	34315585	34316860	2668	174175	.	Upstream	5754	HVAEP1_G010106
chr-5	34924530	34926483	2669	257814	.	OverlapStart	851	HVAEP1_G010130
chr-5	35273699	35275771	2671	115002	.	PeakInsideFeature	13360	HVAEP1_G010140
chr-5	35727815	35729889	2672	179170	.	Downstream	54506	HVAEP1_G010154
chr-5	36704636	36706063	2673	115444	.	OverlapStart	179	HVAEP1_G010175
chr-5	38043017	38046022	2676	208163	.	Downstream	18183	HVAEP1_G010211
chr-5	38415072	38415968	2679	90569	.	Upstream	16246	HVAEP1_G010225
chr-5	38990877	38991730	2680	189136	.	Upstream	10540	HVAEP1_G010247
chr-5	39550406	39551880	2681	178235	.	OverlapStart	405	HVAEP1_G010264
chr-5	40772894	40774376	2689	208816	.	OverlapStart	154	HVAEP1_G010311
chr-5	40967584	40968397	2691	111899	.	Upstream	1453	HVAEP1_G010317
chr-5	41771266	41772862	2697	138208	.	OverlapStart	465	HVAEP1_G010347
chr-5	43680554	43682127	2701	114852	.	Upstream	8386	HVAEP1_G010380
chr-5	43830493	43833537	2702	202531	.	Upstream	10953	HVAEP1_G010387
chr-6	118342	121786	2703	550403	.	Downstream	15134	HVAEP1_G010394
chr-6	427821	429069	2705	100058	.	PeakInsideFeature	1094	HVAEP1_G010405
chr-6	604636	605427	2706	177041	.	Upstream	7421	HVAEP1_G010411
chr-6	1077516	1078636	2707	124235	.	PeakInsideFeature	4003	HVAEP1_G010426
chr-6	1135345	1138397	2708	131323	.	Upstream	17394	HVAEP1_G010427
chr-6	1340174	1341927	2710	400919	.	Downstream	7438	HVAEP1_G010434
chr-6	1567824	1569917	2711	97078	.	Upstream	2759	HVAEP1_G010450
chr-6	1678852	1679977	2712	118742	.	Upstream	39696	HVAEP1_G010452
chr-6	2406985	2408640	2715	349117	.	Upstream	1974	HVAEP1_G010476
chr-6	2522298	2523787	2716	305024	.	OverlapEnd	4218	HVAEP1_G010489
chr-6	3003496	3005409	2718	119536	.	Upstream	12396	HVAEP1_G010507
chr-6	3263751	3265188	2720	139162	.	Upstream	3793	HVAEP1_G010512
chr-6	3275394	3276821	2721	118786	.	OverlapStart	504	HVAEP1_G010513
chr-6	4942347	4944094	2724	84123	.	PeakInsideFeature	9872	HVAEP1_G010567
chr-6	6681796	6683958	2731	235252	.	Downstream	16347	HVAEP1_G010641
chr-6	7371219	7373084	2733	109593	.	OverlapStart	659	HVAEP1_G010661
chr-6	8418216	8419280	2736	115196	.	OverlapStart	367	HVAEP1_G010690
chr-6	8556352	8557175	2737	131501	.	OverlapStart	45	HVAEP1_G010694
chr-6	9482647	9485361	2739	274008	.	OverlapStart	34	HVAEP1_G010726
chr-6	9934250	9935073	2740	88152	.	Downstream	49228	HVAEP1_G010739
chr-6	9942482	9944178	2741	136948	.	Downstream	43414	HVAEP1_G010740
chr-6	10442515	10443505	2745	95710	.	OverlapStart	143	HVAEP1_G010753
chr-6	11053777	11054984	2746	111342	.	Upstream	7615	HVAEP1_G010771
chr-6	11388604	11391793	2748	270139	.	Upstream	14732	HVAEP1_G010783
chr-6	11454827	11457213	2749	115425	.	Downstream	9260	HVAEP1_G010784
chr-6	11701563	11702174	2751	125898	.	Upstream	1049	HVAEP1_G010789
chr-6	12309894	12311000	2755	160792	.	Downstream	17950	HVAEP1_G010802
chr-6	13262684	13264310	2758	126602	.	PeakInsideFeature	5375	HVAEP1_G010833
chr-6	13516379	13519917	2759	298762	.	OverlapStart	355	HVAEP1_G010842
chr-6	14364281	14364963	2761	95612	.	Upstream	13811	HVAEP1_G010871
chr-6	14485739	14487507	2762	210312	.	PeakInsideFeature	11195	HVAEP1_G010872
chr-6	16061834	16063744	2765	270612	.	Upstream	2579	HVAEP1_G010915
chr-6	16881699	16882755	2767	189938	.	PeakInsideFeature	744	HVAEP1_G010954
chr-6	17051272	17054080	2768	267077	.	Upstream	28770	HVAEP1_G010962
chr-6	17138915	17140493	2770	200907	.	PeakInsideFeature	798	HVAEP1_G010965
chr-6	19735274	19740244	2777	436881	.	Downstream	10228	HVAEP1_G011064
chr-6	20603804	20604830	2779	194317	.	Upstream	1416	HVAEP1_G011104
chr-6	21617957	21620038	2782	237130	.	Downstream	8784	HVAEP1_G011141
chr-6	21817617	21820218	2784	326250	.	OverlapStart	271	HVAEP1_G011151
chr-6	22143155	22144473	2785	133888	.	Upstream	2650	HVAEP1_G011159
chr-6	22986811	22987958	2788	112029	.	OverlapStart	430	HVAEP1_G011194
chr-6	23315700	23318289	2790	456458	.	OverlapStart	136	HVAEP1_G011208
chr-6	23774492	23776014	2792	345825	.	OverlapStart	568	HVAEP1_G011230
chr-6	23993145	23994327	2793	108118	.	OverlapStart	522	HVAEP1_G011242
chr-6	24558055	24559669	2796	102637	.	OverlapStart	31	HVAEP1_G011257
chr-6	26679365	26680185	2799	93882	.	OverlapStart	132	HVAEP1_G011310
chr-6	26955828	26958113	2800	99356	.	Downstream	14594	HVAEP1_G011319
chr-6	27472409	27474562	2801	120450	.	Downstream	51505	HVAEP1_G011328
chr-6	28360068	28360870	2804	108855	.	PeakInsideFeature	7244	HVAEP1_G011348
chr-6	28865733	28867775	2806	110748	.	Upstream	10081	HVAEP1_G011365
chr-6	28929373	28931117	2808	106027	.	Upstream	1859	HVAEP1_G011367
chr-6	29051845	29053227	2809	192878	.	OverlapStart	412	HVAEP1_G011373
chr-6	29161459	29162804	2810	104485	.	Upstream	7539	HVAEP1_G011376
chr-6	29238625	29240089	2811	110486	.	Upstream	1515	HVAEP1_G011380
chr-6	29388762	29391104	2812	516307	.	OverlapStart	208	HVAEP1_G011387
chr-6	29404225	29406040	2813	214124	.	Upstream	5107	HVAEP1_G011388
chr-6	29707207	29708732	2816	124280	.	Upstream	2574	HVAEP1_G011401
chr-6	29914215	29916042	2817	141358	.	FeatureInsidePeak	27	HVAEP1_G011406
chr-6	30135487	30136555	2819	84613	.	OverlapStart	114	HVAEP1_G011411
chr-6	31087013	31087556	2821	85811	.	Downstream	14979	HVAEP1_G011435
chr-6	31513321	31514919	2823	183977	.	Upstream	2482	HVAEP1_G011445
chr-6	31764980	31768440	2825	158367	.	OverlapStart	927	HVAEP1_G011454
chr-6	32344697	32346069	2827	124862	.	Downstream	10752	HVAEP1_G011472
chr-6	32777627	32779058	2828	239983	.	Upstream	753	HVAEP1_G011483
chr-6	33109103	33111825	2829	107307	.	OverlapStart	211	HVAEP1_G011490
chr-6	33521914	33523356	2831	96789	.	OverlapStart	359	HVAEP1_G011505
chr-6	34435770	34437265	2834	129725	.	Downstream	22646	HVAEP1_G011531
chr-6	34489798	34490646	2835	292719	.	OverlapStart	149	HVAEP1_G011532
chr-6	34829425	34831098	2836	89004	.	PeakInsideFeature	2546	HVAEP1_G011537
chr-6	35106971	35107998	2838	180621	.	OverlapStart	379	HVAEP1_G011545
chr-6	35159888	35160736	2840	133135	.	OverlapStart	156	HVAEP1_G011546
chr-6	35461458	35463304	2841	285312	.	OverlapStart	257	HVAEP1_G011554
chr-6	35654075	35655297	2842	139727	.	Downstream	7362	HVAEP1_G011557
chr-6	35727681	35729510	2843	92628	.	PeakInsideFeature	1312	HVAEP1_G011559
chr-6	35853734	35855564	2844	132583	.	Upstream	1123	HVAEP1_G011562
chr-6	36510477	36512920	2846	218573	.	OverlapStart	453	HVAEP1_G011585
chr-6	36650827	36651513	2848	125197	.	Upstream	3245	HVAEP1_G011590
chr-6	36951224	36952059	2849	110999	.	OverlapStart	222	HVAEP1_G011594
chr-6	37325803	37327927	2850	192881	.	OverlapStart	312	HVAEP1_G011604
chr-6	37672147	37673572	2851	131204	.	OverlapStart	483	HVAEP1_G011613
chr-6	37773635	37775579	2852	99178	.	OverlapStart	851	HVAEP1_G011616
chr-6	37916910	37919008	2853	97726	.	OverlapStart	509	HVAEP1_G011618
chr-6	38409298	38410799	2855	282155	.	OverlapStart	532	HVAEP1_G011633
chr-6	38492822	38495001	2856	720060	.	PeakInsideFeature	9072	HVAEP1_G011636
chr-6	38514270	38516384	2857	262707	.	OverlapStart	766	HVAEP1_G011637
chr-6	38632075	38632719	2858	140469	.	OverlapStart	11	HVAEP1_G011639
chr-6	38871536	38872674	2859	102858	.	Upstream	9522	HVAEP1_G011642
chr-6	40048642	40049485	2862	114075	.	OverlapStart	276	HVAEP1_G011671
chr-6	40325587	40326702	2863	88336	.	Upstream	15307	HVAEP1_G011686
chr-6	40738950	40740120	2865	256884	.	Upstream	3073	HVAEP1_G011692
chr-6	40786634	40787880	2866	144747	.	PeakInsideFeature	639	HVAEP1_G011694
chr-6	41429552	41430603	2868	95483	.	OverlapStart	425	HVAEP1_G011719
chr-6	41641776	41643962	2869	142206	.	OverlapStart	216	HVAEP1_G011727
chr-6	42623823	42624570	2871	93655	.	OverlapStart	271	HVAEP1_G011750
chr-6	43900812	43901773	2873	138252	.	Downstream	25728	HVAEP1_G011785
chr-6	44673052	44674215	2875	122709	.	OverlapStart	92	HVAEP1_G011803
chr-6	45110920	45112816	2877	156549	.	FeatureInsidePeak	879	HVAEP1_G011819
chr-6	45496996	45499595	2878	97543	.	Upstream	14679	HVAEP1_G011836
chr-6	46031476	46033012	2879	149843	.	PeakInsideFeature	854	HVAEP1_G011848
chr-6	46621399	46622544	2881	125479	.	OverlapStart	243	HVAEP1_G011868
chr-6	47851113	47853061	2883	259688	.	Upstream	8507	HVAEP1_G011908
chr-6	48170485	48171214	2885	87715	.	PeakInsideFeature	2586	HVAEP1_G011924
chr-6	48222791	48224308	2886	182195	.	Upstream	24724	HVAEP1_G011924
chr-6	49675516	49678466	2889	255826	.	Downstream	4759	HVAEP1_G011967
chr-6	50028798	50030494	2892	116662	.	OverlapStart	246	HVAEP1_G011976
chr-6	50885042	50886142	2893	123246	.	Downstream	28882	HVAEP1_G011992
chr-6	51010902	51011978	2894	148797	.	Downstream	5298	HVAEP1_G011996
chr-6	51087972	51088962	2895	94079	.	OverlapStart	3	HVAEP1_G012000
chr-6	51191261	51192826	2897	170282	.	FeatureInsidePeak	156	HVAEP1_G012002
chr-6	51234161	51235542	2898	97274	.	Upstream	20334	HVAEP1_G012004
chr-6	51485771	51487145	2899	106001	.	PeakInsideFeature	4885	HVAEP1_G012011
chr-6	51586733	51588457	2900	153265	.	Upstream	966	HVAEP1_G012014
chr-6	51594476	51596104	2901	154446	.	Upstream	3778	HVAEP1_G012015
chr-6	52558165	52560702	2903	140430	.	PeakInsideFeature	4151	HVAEP1_G012038
chr-6	53188688	53189818	2907	144120	.	OverlapStart	15	HVAEP1_G012066
chr-6	53342226	53344801	2908	194508	.	OverlapStart	415	HVAEP1_G012070
chr-6	53778715	53780746	2911	112846	.	OverlapStart	498	HVAEP1_G012084
chr-6	53783735	53784801	2912	156780	.	Upstream	1410	HVAEP1_G012085
chr-6	54501458	54503307	2913	244052	.	FeatureInsidePeak	428	HVAEP1_G012115
chr-6	55033888	55035837	2915	118174	.	Downstream	4969	HVAEP1_G012133
chr-6	55401173	55402180	2916	324561	.	Upstream	3060	HVAEP1_G012143
chr-6	55543262	55545012	2918	282273	.	OverlapStart	148	HVAEP1_G012148
chr-6	55648204	55649140	2919	88424	.	Upstream	898	HVAEP1_G012151
chr-6	56076817	56078759	2920	195801	.	Downstream	5993	HVAEP1_G012171
chr-6	56363906	56366718	2921	227891	.	PeakInsideFeature	1534	HVAEP1_G012180
chr-6	56669631	56670205	2922	154537	.	PeakInsideFeature	792	HVAEP1_G012187
chr-6	57214974	57216474	2923	98110	.	Downstream	21074	HVAEP1_G012205
chr-6	58054468	58056113	2924	118070	.	OverlapStart	432	HVAEP1_G012220
chr-6	58293645	58295366	2925	98042	.	OverlapStart	179	HVAEP1_G012226
chr-6	58346371	58347783	2926	100701	.	Upstream	52751	HVAEP1_G012226
chr-6	58770590	58772151	2929	121338	.	Downstream	10094	HVAEP1_G012238
chr-6	59602199	59603727	2932	409669	.	OverlapStart	686	HVAEP1_G012267
chr-6	59679277	59680784	2933	351423	.	OverlapStart	230	HVAEP1_G012269
chr-6	60082462	60084369	2935	110833	.	Downstream	3160	HVAEP1_G012282
chr-6	60652779	60654498	2938	280424	.	OverlapStart	275	HVAEP1_G012301
chr-7	1628361	1629938	2945	93728	.	OverlapStart	574	HVAEP1_G012426
chr-7	2397048	2398343	2947	115598	.	Upstream	3010	HVAEP1_G012449
chr-7	2623363	2624846	2948	135553	.	Downstream	12849	HVAEP1_G012457
chr-7	2673318	2674383	2949	131245	.	OverlapStart	367	HVAEP1_G012458
chr-7	3589568	3591712	2951	109382	.	PeakInsideFeature	2904	HVAEP1_G012482
chr-7	3661060	3662366	2953	445755	.	OverlapStart	175	HVAEP1_G012487
chr-7	4581226	4582768	2955	91719	.	PeakInsideFeature	861	HVAEP1_G012536
chr-7	4970961	4972084	2956	147145	.	Upstream	1070	HVAEP1_G012550
chr-7	5992272	5993564	2960	124113	.	Upstream	16437	HVAEP1_G012593
chr-7	6111158	6113046	2961	159462	.	Downstream	13641	HVAEP1_G012596
chr-7	6251248	6252889	2962	192436	.	OverlapStart	411	HVAEP1_G012598
chr-7	6357971	6359612	2963	142512	.	OverlapStart	543	HVAEP1_G012600
chr-7	6368476	6370009	2964	654026	.	OverlapStart	690	HVAEP1_G012602
chr-7	6686558	6688118	2966	202913	.	Upstream	3686	HVAEP1_G012618
chr-7	7098389	7099457	2969	87702	.	OverlapStart	162	HVAEP1_G012627
chr-7	7284865	7285594	2970	150617	.	OverlapStart	286	HVAEP1_G012631
chr-7	8284349	8286260	2975	140577	.	OverlapStart	835	HVAEP1_G012668
chr-7	9056063	9057770	2977	266648	.	OverlapStart	12	HVAEP1_G012704
chr-7	10574143	10575596	2982	101259	.	Downstream	2162	HVAEP1_G012774
chr-7	11187229	11189428	2984	88690	.	PeakInsideFeature	15719	HVAEP1_G012792
chr-7	11768927	11769502	2985	137616	.	OverlapStart	37	HVAEP1_G012805
chr-7	12151469	12152669	2986	101885	.	PeakInsideFeature	39662	HVAEP1_G012815
chr-7	12487299	12490109	2988	157796	.	OverlapStart	1114	HVAEP1_G012821
chr-7	12650727	12652201	2991	215548	.	PeakInsideFeature	14635	HVAEP1_G012829
chr-7	13006522	13008271	2992	105545	.	OverlapStart	1	HVAEP1_G012839
chr-7	13387085	13389130	2993	298802	.	OverlapStart	693	HVAEP1_G012849
chr-7	13629577	13631085	2995	153422	.	OverlapStart	217	HVAEP1_G012858
chr-7	14051122	14052066	2996	103330	.	Downstream	3053	HVAEP1_G012872
chr-7	14082370	14083833	2997	101339	.	Upstream	8946	HVAEP1_G012873
chr-7	14294541	14295649	3000	397501	.	OverlapStart	528	HVAEP1_G012885
chr-7	14929278	14930513	3001	153149	.	OverlapStart	394	HVAEP1_G012906
chr-7	15734752	15735667	3003	95443	.	PeakInsideFeature	605	HVAEP1_G012933
chr-7	15804609	15806268	3005	99298	.	OverlapStart	595	HVAEP1_G012938
chr-7	16309132	16310975	3008	95142	.	Upstream	26615	HVAEP1_G012956
chr-7	16336095	16338102	3009	209189	.	FeatureInsidePeak	430	HVAEP1_G012956
chr-7	16954841	16955733	3010	313864	.	Upstream	2221	HVAEP1_G012971
chr-7	17539278	17540239	3013	112986	.	Upstream	1969	HVAEP1_G012989
chr-7	17684555	17686392	3015	203643	.	FeatureInsidePeak	668	HVAEP1_G012995
chr-7	17968520	17969408	3016	160532	.	OverlapStart	336	HVAEP1_G013001
chr-7	18117323	18118807	3017	98523	.	Upstream	2215	HVAEP1_G013009
chr-7	18307131	18309444	3019	152481	.	PeakInsideFeature	22943	HVAEP1_G013015
chr-7	18448295	18450057	3020	108619	.	PeakInsideFeature	1072	HVAEP1_G013017
chr-7	18670727	18671235	3021	115349	.	Upstream	26952	HVAEP1_G013023
chr-7	18867155	18868214	3025	116216	.	PeakInsideFeature	546	HVAEP1_G013029
chr-7	19011775	19012571	3026	117602	.	OverlapStart	176	HVAEP1_G013032
chr-7	20047765	20049680	3027	139804	.	PeakInsideFeature	26486	HVAEP1_G013051
chr-7	20184310	20185334	3028	157280	.	OverlapStart	265	HVAEP1_G013053
chr-7	20803858	20804778	3030	176398	.	Upstream	1821	HVAEP1_G013072
chr-7	21046910	21048215	3031	97377	.	OverlapStart	493	HVAEP1_G013077
chr-7	21474060	21475865	3034	113442	.	OverlapStart	795	HVAEP1_G013096
chr-7	22668934	22669990	3037	126932	.	OverlapStart	318	HVAEP1_G013121
chr-7	23974759	23976598	3040	132662	.	Upstream	1215	HVAEP1_G013149
chr-7	24658718	24660270	3042	101472	.	Downstream	2123	HVAEP1_G013171
chr-7	25487341	25488865	3044	211165	.	Upstream	5143	HVAEP1_G013189
chr-7	25725663	25728369	3045	238091	.	OverlapStart	906	HVAEP1_G013194
chr-7	26066182	26067686	3047	131506	.	OverlapStart	578	HVAEP1_G013207
chr-7	29109162	29110675	3054	135970	.	OverlapStart	205	HVAEP1_G013278
chr-7	29206700	29208245	3055	135512	.	Downstream	53953	HVAEP1_G013279
chr-7	29246345	29248478	3056	152116	.	PeakInsideFeature	14014	HVAEP1_G013279
chr-7	31145678	31147055	3060	113649	.	OverlapStart	596	HVAEP1_G013346
chr-7	31573261	31575184	3061	240722	.	Upstream	28092	HVAEP1_G013357
chr-7	34504216	34506078	3064	144897	.	OverlapStart	886	HVAEP1_G013430
chr-7	35024882	35026920	3066	139867	.	Upstream	3917	HVAEP1_G013448
chr-7	35102931	35104131	3067	90124	.	Upstream	1524	HVAEP1_G013450
chr-7	35130709	35132512	3068	137251	.	OverlapStart	526	HVAEP1_G013452
chr-7	35618260	35619713	3071	90508	.	Upstream	8534	HVAEP1_G013470
chr-7	35976069	35976719	3072	206541	.	Upstream	9966	HVAEP1_G013480
chr-7	36178647	36181840	3073	283159	.	PeakInsideFeature	7964	HVAEP1_G013488
chr-7	36237648	36241688	3074	284751	.	Upstream	3176	HVAEP1_G013495
chr-7	36655534	36656624	3075	94480	.	Upstream	7705	HVAEP1_G013522
chr-7	37148492	37150283	3077	124217	.	Upstream	11303	HVAEP1_G013544
chr-7	37473897	37476055	3078	371098	.	Downstream	7727	HVAEP1_G013555
chr-7	37568672	37569407	3080	138380	.	Downstream	1975	HVAEP1_G013556
chr-7	38257726	38259255	3082	138254	.	OverlapStart	580	HVAEP1_G013588
chr-7	38890913	38892240	3083	134649	.	Upstream	726	HVAEP1_G013603
chr-7	38914822	38916031	3084	207076	.	OverlapStart	421	HVAEP1_G013604
chr-7	39999564	40000714	3086	102883	.	Upstream	18200	HVAEP1_G013645
chr-7	40328689	40329655	3087	112130	.	OverlapStart	70	HVAEP1_G013667
chr-8	754994	755904	3089	111198	.	Upstream	6365	HVAEP1_G013732
chr-8	756207	757327	3090	89194	.	Upstream	5047	HVAEP1_G013732
chr-8	1225488	1228666	3092	186264	.	Downstream	71093	HVAEP1_G013745
chr-8	3451055	3452512	3096	132073	.	PeakInsideFeature	25094	HVAEP1_G013793
chr-8	3610304	3611808	3097	121373	.	OverlapStart	37	HVAEP1_G013797
chr-8	3843675	3845257	3098	114965	.	OverlapStart	350	HVAEP1_G013806
chr-8	3866283	3866706	3099	90908	.	OverlapStart	67	HVAEP1_G013811
chr-8	3883481	3885242	3100	247468	.	Downstream	8337	HVAEP1_G013813
chr-8	3911438	3912211	3101	168772	.	OverlapStart	200	HVAEP1_G013802
chr-8	4045599	4047475	3103	169610	.	OverlapStart	799	HVAEP1_G013817
chr-8	4076950	4078772	3104	191354	.	Upstream	19205	HVAEP1_G013819
chr-8	4999279	5000470	3109	146540	.	Upstream	34016	HVAEP1_G013834
chr-8	5087797	5089846	3110	120483	.	Upstream	14751	HVAEP1_G013837
chr-8	5218740	5219789	3112	153307	.	OverlapStart	132	HVAEP1_G013839
chr-8	5854302	5859035	3114	199260	.	FeatureInsidePeak	1968	HVAEP1_G013860
chr-8	5950205	5951205	3115	449690	.	OverlapStart	290	HVAEP1_G013863
chr-8	6373661	6375585	3121	156068	.	Downstream	2680	HVAEP1_G013881
chr-8	6391401	6393421	3122	354335	.	Upstream	1248	HVAEP1_G013882
chr-8	6785857	6786733	3124	138115	.	Downstream	5800	HVAEP1_G013891
chr-8	6951318	6952070	3125	124579	.	Upstream	30417	HVAEP1_G013895
chr-8	7535434	7537572	3126	87278	.	Downstream	45964	HVAEP1_G013914
chr-8	8334660	8335686	3127	141206	.	OverlapStart	146	HVAEP1_G013938
chr-8	10258633	10259561	3129	209145	.	OverlapStart	417	HVAEP1_G014003
chr-8	11419150	11420172	3136	182528	.	OverlapStart	45	HVAEP1_G014036
chr-8	11432681	11434571	3137	188898	.	Upstream	1117	HVAEP1_G014038
chr-8	12264919	12265541	3140	149255	.	Upstream	399	HVAEP1_G014060
chr-8	12434176	12435629	3141	215540	.	OverlapStart	571	HVAEP1_G014062
chr-8	14103971	14106343	3143	331685	.	Upstream	5161	HVAEP1_G014128
chr-8	14784500	14785298	3144	118133	.	Upstream	6362	HVAEP1_G014152
chr-8	14799832	14800882	3145	89623	.	OverlapStart	328	HVAEP1_G014153
chr-8	14950083	14951878	3146	203962	.	PeakInsideFeature	1137	HVAEP1_G014158
chr-8	18782358	18785400	3150	417024	.	Downstream	52684	HVAEP1_G014260
chr-8	19306742	19307885	3153	86900	.	OverlapStart	518	HVAEP1_G014274
chr-8	19333583	19334558	3154	92381	.	OverlapStart	32	HVAEP1_G014275
chr-8	19773558	19775359	3155	144721	.	Downstream	9043	HVAEP1_G014293
chr-8	21340683	21341408	3162	143113	.	NA	NA	NA
chr-8	21624374	21626084	3163	102984	.	Upstream	1388	HVAEP1_G014345
chr-8	21641927	21642993	3164	206979	.	OverlapStart	27	HVAEP1_G014346
chr-8	21881374	21884041	3166	256065	.	OverlapStart	1166	HVAEP1_G014359
chr-8	22584434	22585792	3168	126785	.	OverlapStart	451	HVAEP1_G014386
chr-8	22719344	22721028	3169	296431	.	Upstream	1039	HVAEP1_G014394
chr-8	22885394	22886759	3171	195730	.	Upstream	1358	HVAEP1_G014401
chr-8	22967198	22968860	3172	277747	.	OverlapStart	197	HVAEP1_G014407
chr-8	23165387	23166483	3173	330696	.	Downstream	9270	HVAEP1_G014412
chr-8	23276819	23278608	3174	148267	.	Upstream	1201	HVAEP1_G014415
chr-8	25807552	25809283	3180	112784	.	Upstream	7123	HVAEP1_G014506
chr-8	26063065	26063942	3183	106015	.	OverlapEnd	715	HVAEP1_G014519
chr-8	26185535	26188104	3185	106819	.	Upstream	16041	HVAEP1_G014523
chr-8	26985789	26987285	3188	213529	.	Upstream	35773	HVAEP1_G014542
chr-8	27058320	27060864	3189	124255	.	Downstream	18373	HVAEP1_G014543
chr-8	27068153	27068858	3190	135023	.	Downstream	9460	HVAEP1_G014543
chr-8	27372697	27374112	3191	113797	.	Upstream	2585	HVAEP1_G014553
chr-8	27813465	27814462	3193	150019	.	OverlapStart	421	HVAEP1_G014569
chr-8	28599512	28601131	3195	180134	.	OverlapStart	673	HVAEP1_G014600
chr-8	28700821	28702108	3196	121936	.	Upstream	786	HVAEP1_G014602
chr-8	28807031	28808913	3197	119435	.	OverlapStart	457	HVAEP1_G014608
chr-8	28933222	28934581	3198	91433	.	OverlapStart	315	HVAEP1_G014611
chr-8	29951309	29951854	3202	197448	.	OverlapStart	55	HVAEP1_G014637
chr-8	30062609	30063731	3203	123023	.	PeakInsideFeature	5366	HVAEP1_G014639
chr-8	30345006	30345838	3206	177251	.	OverlapStart	180	HVAEP1_G014647
chr-8	30610201	30611693	3207	165623	.	OverlapStart	420	HVAEP1_G014653
chr-8	31592315	31594041	3210	220547	.	OverlapStart	352	HVAEP1_G014692
chr-8	31708320	31709077	3212	192030	.	OverlapStart	332	HVAEP1_G014698
chr-8	31977441	31979393	3215	303831	.	OverlapStart	670	HVAEP1_G014710
chr-8	32415691	32418042	3218	186688	.	Upstream	9554	HVAEP1_G014725
chr-8	32486995	32488623	3220	133444	.	OverlapStart	312	HVAEP1_G014726
chr-8	32551498	32553174	3221	111037	.	OverlapStart	280	HVAEP1_G014728
chr-8	32772039	32773110	3222	227429	.	OverlapStart	97	HVAEP1_G014732
chr-8	32892867	32893626	3223	116043	.	OverlapStart	354	HVAEP1_G014737
chr-8	33197715	33198851	3225	265993	.	FeatureInsidePeak	275	HVAEP1_G014745
chr-8	33407133	33407996	3226	119466	.	OverlapStart	364	HVAEP1_G014752
chr-8	34116836	34118522	3228	141712	.	PeakInsideFeature	6588	HVAEP1_G014774
chr-8	34433976	34434786	3230	184438	.	OverlapStart	83	HVAEP1_G014781
chr-8	34453972	34455358	3231	157357	.	OverlapStart	269	HVAEP1_G014782
chr-8	35261149	35261919	3234	211918	.	OverlapStart	357	HVAEP1_G014806
chr-8	35357452	35359620	3235	435322	.	OverlapStart	210	HVAEP1_G014808
chr-8	36574880	36578164	3237	110277	.	FeatureInsidePeak	59	HVAEP1_G014832
chr-8	37029147	37031016	3239	91771	.	OverlapStart	634	HVAEP1_G014845
chr-8	38341471	38342941	3244	490629	.	Upstream	1115	HVAEP1_G014888
chr-8	39499140	39500527	3247	94533	.	PeakInsideFeature	2234	HVAEP1_G014921
chr-8	41560326	41564414	3248	360659	.	Downstream	7782	HVAEP1_G014981
chr-8	41771274	41772939	3249	112645	.	OverlapEnd	2088	HVAEP1_G014993
chr-8	42299753	42301710	3251	121357	.	PeakInsideFeature	4636	HVAEP1_G015013
chr-8	44776074	44778184	3254	485814	.	OverlapStart	365	HVAEP1_G015090
chr-8	45086861	45089618	3255	219186	.	Upstream	5062	HVAEP1_G015103
chr-8	47019523	47021462	3256	251210	.	Downstream	2033	HVAEP1_G015171
chr-8	47460166	47461930	3257	160999	.	PeakInsideFeature	4993	HVAEP1_G015191
chr-8	47632303	47634101	3258	182625	.	Downstream	18281	HVAEP1_G015195
chr-8	48389745	48391492	3259	236349	.	OverlapStart	642	HVAEP1_G015219
chr-8	49122775	49124532	3261	95682	.	OverlapStart	238	HVAEP1_G015247
chr-8	49148088	49149220	3262	129350	.	OverlapStart	104	HVAEP1_G015248
chr-8	49464197	49466624	3264	102228	.	Upstream	1492	HVAEP1_G015254
chr-8	49989199	49990769	3266	203150	.	Upstream	993	HVAEP1_G015276
chr-8	50734566	50735829	3267	632376	.	OverlapStart	508	HVAEP1_G015302
chr-8	50987011	50991376	3269	221573	.	Upstream	9399	HVAEP1_G015308
chr-8	51354135	51355339	3270	141484	.	OverlapStart	564	HVAEP1_G015321
chr-8	51408015	51411690	3271	353018	.	Downstream	22434	HVAEP1_G015323
chr-8	51941064	51943773	3273	208613	.	Downstream	14872	HVAEP1_G015342
chr-8	52289106	52290859	3274	109195	.	Upstream	9654	HVAEP1_G015359
chr-8	52790461	52791854	3275	108524	.	FeatureInsidePeak	388	HVAEP1_G015365
chr-8	52805912	52806961	3276	113452	.	Downstream	13961	HVAEP1_G015367
chr-8	52837460	52838355	3277	124432	.	OverlapStart	243	HVAEP1_G015369
chr-8	52955208	52957767	3278	121577	.	OverlapStart	1218	HVAEP1_G015373
chr-8	52981174	52982713	3279	111585	.	OverlapStart	606	HVAEP1_G015374
chr-8	53214314	53215535	3280	271400	.	Upstream	997	HVAEP1_G015382
chr-8	54687986	54689208	3282	249083	.	OverlapStart	582	HVAEP1_G015403
chr-8	55991523	55992992	3285	178809	.	PeakInsideFeature	5391	HVAEP1_G015422
chr-8	57154720	57159322	3286	184083	.	Downstream	39530	HVAEP1_G015451
chr-8	57622508	57623457	3287	167179	.	Upstream	5453	HVAEP1_G015467
chr-8	57630293	57631819	3288	129478	.	Upstream	1868	HVAEP1_G015468
chr-8	58744390	58745539	3292	126622	.	Upstream	1943	HVAEP1_G015504
chr-9	804563	805255	3294	115510	.	PeakInsideFeature	36121	HVAEP1_G015569
chr-9	1235138	1236225	3295	145279	.	OverlapStart	440	HVAEP1_G015578
chr-9	1483893	1487388	3296	178806	.	FeatureInsidePeak	1028	HVAEP1_G015584
chr-9	2084896	2086948	3298	330777	.	PeakInsideFeature	8958	HVAEP1_G015604
chr-9	2176935	2177737	3299	264731	.	Upstream	1863	HVAEP1_G015607
chr-9	2555799	2557541	3300	148626	.	FeatureInsidePeak	441	HVAEP1_G015630
chr-9	2599617	2601734	3301	127891	.	Upstream	10612	HVAEP1_G015632
chr-9	2622967	2625250	3302	118411	.	FeatureInsidePeak	431	HVAEP1_G015634
chr-9	2678934	2680773	3303	119002	.	PeakInsideFeature	4966	HVAEP1_G015639
chr-9	2911931	2914160	3304	220587	.	Downstream	22143	HVAEP1_G015654
chr-9	3156953	3158792	3305	127209	.	PeakInsideFeature	2132	HVAEP1_G015663
chr-9	3247492	3251715	3306	855227	.	Upstream	24494	HVAEP1_G015665
chr-9	3405075	3405830	3307	106413	.	OverlapStart	150	HVAEP1_G015668
chr-9	4387396	4390045	3308	266299	.	OverlapStart	599	HVAEP1_G015714
chr-9	4460849	4461783	3309	146454	.	OverlapStart	375	HVAEP1_G015717
chr-9	4686693	4687966	3310	286198	.	OverlapStart	520	HVAEP1_G015722
chr-9	4765438	4766903	3312	138598	.	Upstream	20937	HVAEP1_G015725
chr-9	5758369	5759888	3314	111058	.	Upstream	7957	HVAEP1_G015755
chr-9	6242924	6243907	3315	99628	.	Downstream	9696	HVAEP1_G015768
chr-9	6343727	6346275	3316	123835	.	FeatureInsidePeak	945	HVAEP1_G015771
chr-9	6634278	6635386	3317	116982	.	OverlapStart	176	HVAEP1_G015784
chr-9	7107700	7108553	3319	145440	.	OverlapStart	152	HVAEP1_G015809
chr-9	7331884	7333378	3320	245771	.	Downstream	20068	HVAEP1_G015816
chr-9	7609493	7611003	3323	120875	.	Downstream	8481	HVAEP1_G015821
chr-9	8299884	8304798	3325	372447	.	FeatureInsidePeak	93	HVAEP1_G015842
chr-9	8980599	8983432	3327	210859	.	Upstream	9011	HVAEP1_G015865
chr-9	9823047	9824253	3328	174731	.	Upstream	2019	HVAEP1_G015887
chr-9	9984435	9985280	3329	151727	.	Upstream	12412	HVAEP1_G015897
chr-9	10081620	10083346	3331	106080	.	Downstream	8311	HVAEP1_G015906
chr-9	11609079	11610703	3335	232424	.	OverlapStart	640	HVAEP1_G015962
chr-9	11919040	11921659	3337	235312	.	OverlapStart	723	HVAEP1_G015977
chr-9	12027181	12028199	3338	154302	.	OverlapStart	264	HVAEP1_G015984
chr-9	12217637	12218861	3342	108611	.	OverlapStart	522	HVAEP1_G015992
chr-9	12420480	12421799	3344	110267	.	PeakInsideFeature	863	HVAEP1_G015996
chr-9	12894929	12898261	3345	114146	.	OverlapStart	1446	HVAEP1_G016012
chr-9	13396014	13397402	3348	118668	.	PeakInsideFeature	5283	HVAEP1_G016026
chr-9	13510237	13512456	3349	193009	.	Upstream	2155	HVAEP1_G016029
chr-9	14268646	14269904	3352	149016	.	OverlapStart	430	HVAEP1_G016046
chr-9	14295969	14297446	3353	109886	.	OverlapStart	560	HVAEP1_G016047
chr-9	14519104	14521229	3355	157087	.	Upstream	1825	HVAEP1_G016058
chr-9	14609034	14609830	3356	155795	.	Upstream	527	HVAEP1_G016063
chr-9	15301028	15302855	3358	406911	.	FeatureInsidePeak	30	HVAEP1_G016096
chr-9	15356578	15358436	3359	115999	.	OverlapStart	221	HVAEP1_G016100
chr-9	16158211	16162293	3363	272851	.	FeatureInsidePeak	1945	HVAEP1_G016119
chr-9	16496943	16499530	3364	247538	.	Upstream	2937	HVAEP1_G016131
chr-9	16878915	16881117	3365	208385	.	Upstream	8041	HVAEP1_G016145
chr-9	16935998	16937601	3366	115192	.	Upstream	2243	HVAEP1_G016147
chr-9	17240403	17242016	3368	140055	.	Downstream	28121	HVAEP1_G016153
chr-9	17758414	17760130	3371	147170	.	Upstream	4860	HVAEP1_G016178
chr-9	17894643	17896279	3372	213097	.	OverlapStart	534	HVAEP1_G016187
chr-9	18689483	18691303	3374	145244	.	FeatureInsidePeak	121	HVAEP1_G016207
chr-9	19639698	19640951	3379	139365	.	OverlapStart	40	HVAEP1_G016234
chr-9	19865437	19866123	3382	215381	.	Upstream	4346	HVAEP1_G016242
chr-9	20065143	20065983	3383	85059	.	Upstream	451	HVAEP1_G016250
chr-9	20253324	20255041	3385	98749	.	OverlapStart	644	HVAEP1_G016258
chr-9	21328410	21329878	3389	212774	.	OverlapStart	237	HVAEP1_G016286
chr-9	21429349	21430927	3390	370002	.	Upstream	43511	HVAEP1_G016289
chr-9	22767692	22769130	3391	143952	.	OverlapStart	672	HVAEP1_G016320
chr-9	23135919	23137647	3394	113334	.	Downstream	11495	HVAEP1_G016329
chr-9	23527714	23529034	3395	104397	.	Upstream	1620	HVAEP1_G016344
chr-9	23689188	23690598	3396	245729	.	OverlapStart	113	HVAEP1_G016347
chr-9	24016452	24017667	3397	306804	.	OverlapStart	596	HVAEP1_G016357
chr-9	24286931	24289053	3399	169795	.	Upstream	4330	HVAEP1_G016370
chr-9	24395580	24396270	3400	121242	.	OverlapStart	4	HVAEP1_G016377
chr-9	24578961	24580548	3401	216028	.	Upstream	1520	HVAEP1_G016385
chr-9	24992593	24993814	3403	111552	.	Upstream	6049	HVAEP1_G016402
chr-9	25981558	25983102	3408	146224	.	PeakInsideFeature	5637	HVAEP1_G016426
chr-9	26240802	26241722	3409	105633	.	Upstream	7617	HVAEP1_G016432
chr-9	26430188	26430691	3410	102360	.	PeakInsideFeature	309	HVAEP1_G016437
chr-9	27242021	27243388	3416	110107	.	Upstream	3373	HVAEP1_G016454
chr-9	27444067	27445241	3417	112605	.	OverlapStart	527	HVAEP1_G016461
chr-9	27543850	27546122	3418	115850	.	FeatureInsidePeak	503	HVAEP1_G016470
chr-9	28111422	28112880	3419	123128	.	Upstream	827	HVAEP1_G016481
chr-9	28736159	28736755	3421	176881	.	Upstream	1362	HVAEP1_G016494
chr-9	28895834	28896523	3423	94842	.	Upstream	522	HVAEP1_G016500
chr-9	29040828	29042050	3424	160284	.	Upstream	1085	HVAEP1_G016506
chr-9	29257229	29257783	3425	249051	.	OverlapStart	185	HVAEP1_G016512
chr-9	29376714	29377995	3426	296703	.	PeakInsideFeature	668	HVAEP1_G016518
chr-9	29740514	29743462	3427	356631	.	OverlapStart	500	HVAEP1_G016527
chr-9	29876383	29877608	3428	272641	.	OverlapStart	496	HVAEP1_G016534
chr-9	30007088	30009834	3429	302220	.	Upstream	4031	HVAEP1_G016535
chr-9	30229247	30230973	3431	217776	.	OverlapStart	244	HVAEP1_G016543
chr-9	30510724	30512217	3432	258285	.	PeakInsideFeature	4651	HVAEP1_G016552
chr-9	30727485	30728322	3433	102920	.	Upstream	12094	HVAEP1_G016558
chr-9	31056941	31057593	3436	102503	.	OverlapStart	31	HVAEP1_G016576
chr-9	31222495	31223574	3438	92523	.	Upstream	7950	HVAEP1_G016580
chr-9	31230176	31231973	3439	120175	.	OverlapStart	90	HVAEP1_G016580
chr-9	31291081	31291717	3440	146859	.	OverlapStart	192	HVAEP1_G016583
chr-9	31446283	31448241	3443	142654	.	Downstream	11184	HVAEP1_G016587
chr-9	31513978	31515891	3444	140647	.	OverlapStart	677	HVAEP1_G016592
chr-9	31783499	31784782	3445	107333	.	OverlapStart	528	HVAEP1_G016600
chr-9	31904947	31906367	3446	101096	.	OverlapStart	308	HVAEP1_G016604
chr-9	31912789	31914831	3447	186155	.	Upstream	3778	HVAEP1_G016605
chr-9	32266306	32267898	3450	118043	.	PeakInsideFeature	797	HVAEP1_G016617
chr-9	32338696	32340668	3451	119449	.	OverlapStart	57	HVAEP1_G016623
chr-9	32990342	32992626	3454	130223	.	OverlapStart	373	HVAEP1_G016649
chr-9	33473250	33474185	3458	209085	.	OverlapStart	29	HVAEP1_G016674
chr-9	34815301	34817053	3462	189551	.	PeakInsideFeature	10959	HVAEP1_G016740
chr-9	35314190	35315930	3464	114913	.	Upstream	2940	HVAEP1_G016753
chr-9	35350708	35352571	3465	94657	.	OverlapStart	580	HVAEP1_G016754
chr-9	35951701	35952831	3466	244049	.	Upstream	14120	HVAEP1_G016767
chr-9	36106952	36108319	3467	239516	.	Downstream	7337	HVAEP1_G016772
chr-9	36378915	36380101	3468	168317	.	PeakInsideFeature	6066	HVAEP1_G016778
chr-9	36754074	36755011	3471	94358	.	Upstream	1592	HVAEP1_G016792
chr-9	36939118	36939764	3472	99665	.	OverlapStart	216	HVAEP1_G016798
chr-9	37142966	37144386	3474	132819	.	OverlapStart	281	HVAEP1_G016804
chr-9	37295899	37297764	3477	235969	.	FeatureInsidePeak	497	HVAEP1_G016813
chr-9	37736691	37738053	3478	131799	.	Upstream	2473	HVAEP1_G016824
chr-9	37843332	37844587	3479	95431	.	PeakInsideFeature	16233	HVAEP1_G016825
chr-9	38202642	38204033	3481	136006	.	Upstream	2986	HVAEP1_G016840
chr-9	38220401	38222292	3482	151042	.	Downstream	5842	HVAEP1_G016841
chr-9	38280369	38282079	3483	106335	.	Downstream	3211	HVAEP1_G016843
chr-9	39102380	39104182	3491	156640	.	FeatureInsidePeak	719	HVAEP1_G016879
chr-9	39152325	39154586	3492	162791	.	Upstream	4191	HVAEP1_G016882
chr-9	39316383	39317811	3494	100386	.	Upstream	5911	HVAEP1_G016889
chr-9	39789874	39792374	3497	369579	.	Upstream	58898	HVAEP1_G016902
chr-9	40137980	40139679	3498	295351	.	OverlapStart	267	HVAEP1_G016910
chr-9	40243263	40244909	3499	307464	.	Upstream	6195	HVAEP1_G016916
chr-9	40298102	40300066	3500	113805	.	OverlapStart	10	HVAEP1_G016917
chr-9	40356266	40357847	3501	117322	.	OverlapStart	764	HVAEP1_G016919
chr-9	40624342	40625656	3502	137552	.	OverlapStart	255	HVAEP1_G016931
chr-9	40833873	40834616	3503	83751	.	OverlapStart	348	HVAEP1_G016935
chr-9	41118031	41118743	3505	110368	.	PeakInsideFeature	457	HVAEP1_G016943
chr-9	41221673	41223389	3506	175613	.	OverlapStart	379	HVAEP1_G016946
chr-9	41640150	41642012	3508	94886	.	Upstream	1082	HVAEP1_G016963
chr-9	41905671	41907135	3509	181757	.	OverlapStart	544	HVAEP1_G016967
chr-9	42193222	42194551	3510	88175	.	OverlapStart	329	HVAEP1_G016980
chr-9	42363013	42366767	3511	287899	.	Downstream	6508	HVAEP1_G016990
chr-9	42381641	42385677	3512	396937	.	Upstream	4650	HVAEP1_G016992
chr-9	42509321	42512376	3513	187154	.	Downstream	8030	HVAEP1_G017008
chr-9	42880241	42881199	3515	89252	.	Upstream	1256	HVAEP1_G017027
chr-9	43027816	43029832	3516	163193	.	OverlapStart	443	HVAEP1_G017033
chr-9	43166638	43167601	3517	169821	.	OverlapStart	309	HVAEP1_G017038
chr-9	43296129	43298184	3518	324145	.	OverlapStart	216	HVAEP1_G017043
chr-9	44101451	44102990	3521	417378	.	OverlapStart	374	HVAEP1_G017068
chr-9	44146519	44147851	3522	104144	.	PeakInsideFeature	1656	HVAEP1_G017069
chr-9	45609119	45610011	3523	192362	.	Upstream	1452	HVAEP1_G017098
chr-9	46336703	46338165	3527	122933	.	Upstream	15942	HVAEP1_G017130
chr-9	46376026	46378369	3528	157335	.	OverlapStart	750	HVAEP1_G017131
chr-9	47245578	47247190	3535	169466	.	OverlapStart	326	HVAEP1_G017156
chr-9	48124825	48125672	3543	127631	.	PeakInsideFeature	458	HVAEP1_G017182
chr-9	49323267	49324968	3547	295306	.	Upstream	3706	HVAEP1_G017220
chr-9	49365211	49366621	3548	134518	.	Upstream	2676	HVAEP1_G017221
chr-9	49671559	49673380	3553	149150	.	Upstream	2897	HVAEP1_G017231
chr-9	50880222	50881673	3557	98182	.	OverlapStart	453	HVAEP1_G017280
chr-9	51197529	51199901	3558	334267	.	OverlapStart	102	HVAEP1_G017297
chr-9	51845425	51847821	3561	135363	.	OverlapStart	639	HVAEP1_G017328
chr-9	53519617	53521363	3564	247300	.	PeakInsideFeature	11390	HVAEP1_G017374
chr-9	54907169	54908620	3566	262607	.	FeatureInsidePeak	187	HVAEP1_G017409
chr-9	54917908	54919229	3567	142248	.	OverlapStart	390	HVAEP1_G017410
chr-9	55120952	55121537	3569	85063	.	Upstream	1447	HVAEP1_G017415
chr-9	56777402	56779314	3572	339351	.	OverlapStart	354	HVAEP1_G017459
chr-9	56787288	56787782	3573	121098	.	Upstream	8823	HVAEP1_G017459
chr-9	57247516	57248478	3576	117872	.	Upstream	569	HVAEP1_G017471
chr-9	57342355	57343502	3578	97234	.	OverlapStart	157	HVAEP1_G017473
chr-9	57691344	57692270	3580	244630	.	Upstream	3752	HVAEP1_G017490
chr-9	58013928	58015310	3581	152659	.	OverlapStart	361	HVAEP1_G017507
chr-9	58648375	58649340	3583	135035	.	OverlapStart	234	HVAEP1_G017523
chr-9	58811357	58813016	3584	376491	.	Upstream	1302	HVAEP1_G017527
chr-9	58855597	58856633	3585	154809	.	OverlapStart	144	HVAEP1_G017528
chr-9	59150051	59150965	3587	218585	.	Upstream	1395	HVAEP1_G017539
chr-9	59505705	59507083	3588	100549	.	Upstream	1879	HVAEP1_G017549
chr-9	59540612	59543645	3589	254823	.	OverlapStart	234	HVAEP1_G017551
chr-9	59669950	59671941	3590	264084	.	OverlapStart	250	HVAEP1_G017553
chr-9	59719427	59721155	3591	180168	.	OverlapStart	352	HVAEP1_G017555
chr-9	59829507	59830795	3593	215171	.	OverlapStart	491	HVAEP1_G017561
chr-9	60312242	60312893	3595	92070	.	OverlapStart	185	HVAEP1_G017584
chr-9	60846184	60849313	3597	154935	.	Upstream	18261	HVAEP1_G017599
chr-9	60940453	60943547	3598	151064	.	Upstream	2258	HVAEP1_G017601
chr-9	61816529	61821226	3602	259511	.	Upstream	69267	HVAEP1_G017619
chr-9	61887661	61890095	3603	375344	.	FeatureInsidePeak	734	HVAEP1_G017619
chr-9	62081982	62084296	3604	131783	.	OverlapStart	804	HVAEP1_G017621

## Sheet: H3K27me3 Peaks
Chromosome	Start	Stop	Peak ID	Peak Score	Strand
chr-1	428823	432758	19	97959	.
chr-1	830370	833446	33	98045	.
chr-1	4987145	4991402	103	153016	.
chr-1	5090487	5091932	114	118422	.
chr-1	5117661	5121586	116	122692	.
chr-1	5138511	5142331	117	107786	.
chr-1	8967399	8971492	191	72545	.
chr-1	19838620	19841717	406	223546	.
chr-1	19844985	19848863	407	135941	.
chr-1	19889080	19891033	408	158618	.
chr-1	19894560	19899155	410	277636	.
chr-1	20021027	20025070	420	101549	.
chr-1	20055790	20059402	425	395990	.
chr-1	21480744	21483327	453	87045	.
chr-1	21991505	21992662	472	69310	.
chr-1	23364065	23365848	489	78011	.
chr-1	23960953	23963322	517	109848	.
chr-1	25197350	25200767	564	152830	.
chr-1	26332767	26333997	608	88900	.
chr-1	26396457	26399521	614	81224	.
chr-1	27497775	27501199	655	192159	.
chr-1	27847377	27850301	661	75799	.
chr-1	28978704	28982336	703	115927	.
chr-1	29271570	29275200	713	102230	.
chr-1	29507546	29509414	726	71874	.
chr-1	29515030	29517987	727	307976	.
chr-1	30408483	30411176	772	194903	.
chr-1	30512406	30514695	786	115598	.
chr-1	30515008	30517442	787	72509	.
chr-1	30522661	30524529	788	110841	.
chr-1	30534718	30535890	790	83042	.
chr-1	30640287	30642830	798	204752	.
chr-1	30771974	30773524	812	72839	.
chr-1	30835787	30837555	819	99595	.
chr-1	30988510	30993265	837	258882	.
chr-1	31200064	31201755	847	88906	.
chr-1	31252458	31256263	852	84859	.
chr-1	31350692	31353237	860	86452	.
chr-1	31358683	31360108	862	82274	.
chr-1	31603460	31607749	876	101135	.
chr-1	32081708	32083636	902	69637	.
chr-1	32429901	32433078	923	80560	.
chr-1	32466480	32469114	925	99183	.
chr-1	32544198	32546228	930	93480	.
chr-1	32588541	32590853	938	64296	.
chr-1	32742301	32746907	946	83473	.
chr-1	33362733	33367392	989	208281	.
chr-1	33376195	33377930	990	75812	.
chr-1	33393542	33395317	994	77094	.
chr-1	33824697	33828091	1007	80779	.
chr-1	33834998	33837375	1008	68806	.
chr-1	34193928	34198304	1016	213521	.
chr-1	34490127	34493903	1031	76994	.
chr-1	34702425	34706338	1049	97352	.
chr-1	36196857	36199306	1105	93256	.
chr-1	36886498	36888618	1128	74253	.
chr-1	37909158	37911874	1163	87096	.
chr-1	38117484	38122793	1186	144835	.
chr-1	38432410	38436335	1201	245648	.
chr-1	38477111	38479901	1209	265798	.
chr-1	39691454	39694657	1235	106421	.
chr-1	39723813	39728787	1240	100079	.
chr-1	39945701	39948666	1246	68801	.
chr-1	40010401	40014561	1254	143569	.
chr-1	40536352	40539925	1288	133309	.
chr-1	40588036	40590535	1291	89955	.
chr-1	40595976	40597360	1293	89915	.
chr-1	40638325	40640635	1298	152464	.
chr-1	40673228	40675538	1303	93794	.
chr-1	41757746	41759007	1345	96470	.
chr-1	41928259	41930328	1356	81162	.
chr-1	42209617	42213439	1376	91277	.
chr-1	42831658	42835755	1404	101663	.
chr-1	43131376	43134615	1430	74177	.
chr-1	43438075	43441143	1445	87226	.
chr-1	43635666	43639499	1459	111650	.
chr-1	43860698	43862800	1477	119914	.
chr-1	44512781	44515630	1488	72331	.
chr-1	44590453	44592424	1498	113222	.
chr-1	44763584	44766969	1509	110093	.
chr-1	44769926	44771836	1510	94365	.
chr-1	45945757	45947281	1553	113937	.
chr-1	46163685	46166566	1565	66246	.
chr-1	46358082	46360501	1569	75754	.
chr-1	47075880	47079464	1592	141636	.
chr-1	47613532	47615870	1607	71244	.
chr-1	48911652	48914744	1644	80830	.
chr-1	48981843	48985696	1650	136426	.
chr-1	49032123	49035639	1657	99938	.
chr-1	49189095	49190253	1664	91712	.
chr-1	49522787	49525172	1675	100353	.
chr-1	49530740	49534637	1677	185740	.
chr-1	49536212	49538530	1678	100886	.
chr-1	49548205	49551712	1680	156519	.
chr-1	50118504	50120460	1702	95321	.
chr-1	50124986	50126965	1703	84020	.
chr-1	50307564	50309247	1716	159718	.
chr-1	50833065	50840547	1741	270733	.
chr-1	50846042	50847974	1743	73554	.
chr-1	51612314	51614126	1788	89682	.
chr-1	51647492	51649928	1795	67054	.
chr-1	51677651	51681478	1800	90258	.
chr-1	51692005	51693923	1802	123313	.
chr-1	51774465	51777697	1810	90939	.
chr-1	51886559	51888809	1820	108401	.
chr-1	52161105	52162592	1832	86103	.
chr-1	52912163	52914174	1859	169802	.
chr-1	53823812	53827555	1903	80353	.
chr-1	54024404	54027476	1917	306209	.
chr-1	54069933	54073736	1925	97618	.
chr-1	54101945	54103822	1929	70078	.
chr-1	54159261	54163422	1934	147760	.
chr-1	54382074	54384377	1941	95439	.
chr-1	54531618	54535624	1960	84312	.
chr-1	55298189	55303484	2001	175768	.
chr-1	55630180	55632821	2023	71768	.
chr-1	55731059	55735183	2033	111743	.
chr-1	55775846	55779433	2036	160757	.
chr-1	56204738	56208297	2062	170686	.
chr-1	56526372	56529885	2080	145550	.
chr-1	56589602	56591785	2084	65333	.
chr-1	57098976	57102788	2107	94904	.
chr-1	57185559	57188999	2112	100038	.
chr-1	57262083	57265896	2117	201949	.
chr-1	57291452	57299421	2124	580737	.
chr-1	57312587	57315320	2126	77924	.
chr-1	57583749	57587017	2140	104453	.
chr-1	57624620	57628337	2141	113887	.
chr-1	58622733	58626047	2171	128014	.
chr-1	58670303	58672942	2176	69821	.
chr-1	59160689	59164660	2190	125940	.
chr-1	59312823	59316303	2197	79981	.
chr-1	59431497	59435734	2206	197563	.
chr-1	59455041	59459244	2209	234955	.
chr-1	59465599	59468166	2212	117908	.
chr-1	59469251	59474228	2213	227831	.
chr-1	59666762	59671021	2217	112608	.
chr-1	60370208	60373337	2238	91972	.
chr-1	60412986	60415573	2245	72657	.
chr-1	60584638	60586298	2247	86032	.
chr-1	60739584	60741799	2256	104262	.
chr-1	60899759	60903316	2276	90693	.
chr-1	60984586	60986719	2278	93439	.
chr-1	61038207	61041421	2281	112500	.
chr-1	61144738	61146691	2290	98945	.
chr-1	61147397	61150292	2291	144617	.
chr-1	61175781	61180366	2295	180146	.
chr-1	62084319	62087732	2338	81811	.
chr-1	62257176	62259185	2358	96626	.
chr-1	62390701	62392616	2368	183037	.
chr-1	62697581	62700580	2383	97476	.
chr-1	62861840	62864862	2386	145751	.
chr-1	62935660	62938129	2392	95640	.
chr-1	63157445	63159674	2406	94598	.
chr-1	63310109	63314616	2418	114011	.
chr-1	63362925	63366450	2425	150613	.
chr-1	63580966	63582997	2452	125300	.
chr-1	63587033	63588940	2454	79326	.
chr-1	63863383	63865441	2470	77563	.
chr-1	64388374	64390824	2499	84850	.
chr-1	64467951	64471039	2504	138983	.
chr-1	64723874	64726108	2529	106124	.
chr-1	64949161	64952266	2553	74632	.
chr-1	65055516	65058486	2563	81652	.
chr-1	65610933	65613789	2597	71692	.
chr-1	65644074	65646662	2599	105272	.
chr-1	65921491	65923364	2615	150338	.
chr-1	66056612	66058427	2628	131995	.
chr-1	66182666	66185123	2643	106687	.
chr-1	66807146	66809126	2676	78886	.
chr-1	66939748	66942198	2684	85021	.
chr-1	67094484	67098192	2695	97592	.
chr-1	67099370	67101373	2696	91241	.
chr-1	67183318	67186105	2702	69801	.
chr-1	67447953	67450909	2726	147345	.
chr-1	67469544	67472354	2730	93292	.
chr-1	67859346	67861211	2761	80640	.
chr-1	68124912	68127639	2778	78254	.
chr-1	68942175	68943252	2802	70009	.
chr-1	69008743	69012816	2807	162630	.
chr-1	69069798	69071805	2814	248657	.
chr-1	69403733	69408367	2834	117336	.
chr-1	69973606	69976690	2870	96142	.
chr-1	69981633	69983260	2871	82165	.
chr-1	70225595	70228313	2890	73563	.
chr-1	70234506	70236509	2891	159729	.
chr-1	70250610	70253200	2892	71639	.
chr-1	70266475	70267871	2895	71394	.
chr-1	70463455	70464754	2908	72942	.
chr-1	70564982	70569723	2921	120962	.
chr-1	70696801	70698758	2926	104272	.
chr-1	70753647	70757229	2928	180028	.
chr-1	71104941	71109591	2954	81189	.
chr-1	71124621	71128149	2957	94152	.
chr-1	71261259	71262967	2967	69225	.
chr-1	71283068	71286435	2969	119596	.
chr-1	71354175	71357833	2975	181758	.
chr-1	71443968	71446407	2983	75670	.
chr-1	71729667	71733478	3008	92661	.
chr-1	72173086	72174930	3039	71617	.
chr-1	72383416	72384971	3056	83877	.
chr-1	72746666	72748964	3068	94245	.
chr-1	72993355	72995526	3077	97221	.
chr-1	73093728	73095529	3083	98437	.
chr-1	73338073	73341893	3102	98769	.
chr-1	73512946	73515317	3115	74928	.
chr-1	73606819	73611706	3118	123126	.
chr-1	73663216	73665068	3121	87553	.
chr-1	74013651	74017298	3150	100167	.
chr-1	74062192	74065794	3157	183132	.
chr-1	74264290	74269722	3170	168289	.
chr-1	74284096	74286131	3173	62967	.
chr-1	74453371	74455237	3191	65504	.
chr-1	74523183	74525709	3198	114827	.
chr-1	74867119	74873414	3210	282631	.
chr-1	75581733	75584828	3227	111274	.
chr-1	75905101	75907520	3235	68336	.
chr-1	75945356	75948923	3242	85045	.
chr-1	76261909	76265245	3262	119248	.
chr-1	76275640	76281260	3264	125534	.
chr-1	76384705	76386544	3272	111198	.
chr-1	76386880	76388852	3273	207811	.
chr-1	76390152	76392405	3275	97667	.
chr-1	76625402	76626833	3293	66601	.
chr-1	76627938	76630734	3294	131219	.
chr-1	76759158	76763170	3309	131375	.
chr-1	76867194	76870974	3316	169807	.
chr-1	77262543	77264946	3355	74571	.
chr-1	77497197	77499142	3379	90110	.
chr-1	77631002	77632948	3393	73928	.
chr-1	77983318	77985018	3416	101198	.
chr-1	78046376	78048831	3424	88242	.
chr-1	78052310	78053721	3426	122752	.
chr-1	78207739	78209567	3444	93476	.
chr-1	78495699	78500263	3476	89941	.
chr-1	78587332	78590991	3484	91865	.
chr-1	78656267	78660904	3487	279073	.
chr-1	78947492	78950873	3506	281076	.
chr-1	78951267	78952856	3507	82565	.
chr-1	79021198	79024924	3515	83699	.
chr-1	79037123	79039877	3518	107393	.
chr-1	79218453	79219648	3529	221155	.
chr-1	79349227	79350415	3540	148820	.
chr-1	79372196	79374100	3545	65712	.
chr-1	79429672	79430870	3554	80152	.
chr-1	79721259	79723951	3575	131799	.
chr-1	79887322	79890592	3579	165681	.
chr-1	80686579	80690016	3617	85347	.
chr-10	9599	10189	3629	87026	.
chr-10	200094	202743	3644	104437	.
chr-10	429419	432349	3653	195708	.
chr-10	1405652	1410036	3705	208748	.
chr-10	1437367	1439249	3709	91708	.
chr-10	1447564	1449656	3712	86128	.
chr-10	1452510	1455447	3713	203630	.
chr-10	1492373	1495261	3718	133734	.
chr-10	1515043	1517603	3722	84210	.
chr-10	1902863	1908358	3748	206925	.
chr-10	2216071	2218739	3761	86447	.
chr-10	2221479	2223497	3762	99241	.
chr-10	2557102	2560187	3775	94741	.
chr-10	2678940	2682914	3788	193356	.
chr-10	2690129	2692264	3790	69920	.
chr-10	2707828	2711245	3792	200663	.
chr-10	3021964	3024176	3800	119454	.
chr-10	3039776	3044363	3802	100417	.
chr-10	3097844	3101031	3812	70611	.
chr-10	3880732	3883405	3858	94874	.
chr-10	4257125	4259902	3876	159833	.
chr-10	4464562	4469654	3881	127746	.
chr-10	4883158	4886836	3900	94725	.
chr-10	4922817	4926736	3902	175029	.
chr-10	4953713	4957663	3907	128021	.
chr-10	4961496	4965516	3908	151522	.
chr-10	4978681	4983360	3911	261837	.
chr-10	5120195	5123100	3925	77843	.
chr-10	5129125	5131502	3927	92622	.
chr-10	5173748	5176512	3929	87006	.
chr-10	5459374	5461945	3946	75782	.
chr-10	6085151	6088259	3976	125788	.
chr-10	6357083	6360783	3988	85402	.
chr-10	6541927	6543894	3997	82754	.
chr-10	6550796	6553992	3999	185754	.
chr-10	6695650	6702343	4011	216223	.
chr-10	6709247	6711245	4013	84226	.
chr-10	8566348	8567653	4060	97916	.
chr-10	8595614	8597555	4063	89673	.
chr-10	8604721	8607730	4064	119745	.
chr-10	8907903	8911300	4075	196497	.
chr-10	8916041	8918853	4076	112884	.
chr-10	9114295	9116859	4087	135914	.
chr-10	9179478	9181411	4091	66837	.
chr-10	9720239	9723069	4112	103489	.
chr-10	9784254	9786322	4115	125879	.
chr-10	9845991	9848455	4120	89024	.
chr-10	9852319	9856306	4122	84041	.
chr-10	10557354	10561715	4151	128736	.
chr-10	10990891	10993069	4176	84751	.
chr-10	11099837	11102184	4187	74652	.
chr-10	11168017	11171285	4191	159036	.
chr-10	11234729	11240301	4194	178307	.
chr-10	11489723	11491772	4200	104563	.
chr-10	11492579	11500222	4201	233401	.
chr-10	11507214	11509702	4203	85955	.
chr-10	11761599	11763563	4216	105090	.
chr-10	11885915	11887073	4229	85971	.
chr-10	12057482	12059535	4239	75328	.
chr-10	12162129	12163018	4245	68499	.
chr-10	12398271	12400193	4250	68059	.
chr-10	13908227	13911087	4289	147757	.
chr-10	14097729	14099224	4302	99311	.
chr-10	14104608	14106582	4303	79401	.
chr-10	14115717	14119059	4306	75333	.
chr-10	14225945	14228741	4311	154962	.
chr-10	14258356	14260094	4314	99149	.
chr-10	14317367	14320886	4319	96629	.
chr-10	14708100	14709459	4342	92574	.
chr-10	14773446	14775945	4348	94369	.
chr-10	14778596	14780647	4349	92838	.
chr-10	14840179	14842833	4355	70624	.
chr-10	14851288	14854560	4358	462275	.
chr-10	14946690	14950345	4370	113438	.
chr-10	14983612	14986085	4372	120253	.
chr-10	14998416	15001800	4373	105475	.
chr-10	15166956	15170580	4383	101841	.
chr-10	15465969	15468119	4399	113767	.
chr-10	15672509	15675420	4416	69998	.
chr-10	16230982	16234030	4435	92650	.
chr-10	16408953	16410955	4451	92416	.
chr-10	16417058	16420850	4452	205498	.
chr-10	16433009	16434548	4454	124376	.
chr-10	16439596	16446477	4455	234654	.
chr-10	16873360	16878227	4472	140956	.
chr-10	17154095	17156025	4489	85023	.
chr-10	17811406	17813883	4515	101465	.
chr-10	18969977	18976011	4551	183027	.
chr-10	19101614	19103474	4559	106455	.
chr-10	19307432	19313034	4569	176636	.
chr-10	19483261	19486060	4579	66000	.
chr-10	20090758	20093121	4608	106468	.
chr-10	20543828	20546977	4624	108280	.
chr-10	20747288	20750767	4632	106853	.
chr-10	20754890	20758867	4633	130483	.
chr-10	20786023	20788467	4636	84245	.
chr-10	20941650	20944628	4645	101288	.
chr-10	21047603	21051178	4652	68045	.
chr-10	22259512	22261594	4705	82892	.
chr-10	22591844	22594466	4723	195583	.
chr-10	22674714	22676723	4735	130114	.
chr-10	23401368	23403734	4760	129252	.
chr-10	23499240	23502599	4765	104334	.
chr-10	24961263	24963922	4819	90330	.
chr-10	25366282	25370263	4836	89931	.
chr-10	25492662	25494744	4841	106221	.
chr-10	26260946	26265048	4871	76321	.
chr-10	26888289	26893185	4901	93715	.
chr-10	27033443	27035793	4908	197242	.
chr-10	27152723	27156403	4922	106480	.
chr-10	27476024	27477329	4946	66326	.
chr-10	27531619	27533712	4952	84844	.
chr-10	27800089	27802465	4973	106997	.
chr-10	27869145	27872620	4979	67282	.
chr-10	28420005	28424131	4997	120372	.
chr-10	28632096	28634248	5007	100238	.
chr-10	28826903	28829001	5019	94406	.
chr-10	29266023	29270013	5041	221474	.
chr-10	29275010	29279179	5042	155069	.
chr-10	29364818	29366376	5051	77595	.
chr-10	29421046	29422232	5054	137258	.
chr-10	29504042	29505955	5066	107104	.
chr-10	29640599	29645482	5069	162132	.
chr-10	29682621	29686246	5074	155673	.
chr-10	29703156	29707673	5076	106368	.
chr-10	29768364	29770730	5078	105702	.
chr-10	30503558	30507049	5118	142054	.
chr-10	30619767	30624091	5128	124673	.
chr-10	30770164	30773541	5135	107369	.
chr-10	31062451	31063917	5161	118224	.
chr-10	31189502	31190601	5175	121359	.
chr-10	31192996	31195086	5176	79594	.
chr-10	31206699	31212079	5178	226788	.
chr-10	31213536	31215903	5179	120149	.
chr-10	31416637	31419443	5193	87108	.
chr-10	31452037	31454904	5197	113329	.
chr-10	32150089	32152388	5229	95004	.
chr-10	32177963	32181670	5233	176396	.
chr-10	32381687	32384862	5237	99950	.
chr-10	32436532	32437993	5245	128471	.
chr-10	33545500	33547536	5276	89615	.
chr-10	33646301	33648972	5283	94317	.
chr-10	33723637	33726090	5289	98033	.
chr-10	33782309	33786755	5296	101272	.
chr-10	33947697	33951401	5299	84127	.
chr-10	34117583	34120266	5311	123144	.
chr-10	34123134	34125510	5312	119522	.
chr-10	34365648	34368549	5328	120848	.
chr-10	34474405	34476893	5334	72031	.
chr-10	34872696	34875284	5355	76400	.
chr-10	36184135	36187606	5386	76500	.
chr-10	36195738	36198659	5389	128119	.
chr-10	36345609	36347931	5399	87134	.
chr-10	36370111	36371982	5402	89471	.
chr-10	36401619	36403310	5406	83627	.
chr-10	36420476	36422612	5410	73725	.
chr-10	37887252	37889559	5458	74597	.
chr-10	38024104	38028221	5462	251160	.
chr-10	38095311	38097306	5470	119962	.
chr-10	38373747	38380573	5483	121360	.
chr-10	38515276	38518341	5493	88733	.
chr-10	38531153	38534710	5496	157764	.
chr-10	38609078	38610675	5509	75904	.
chr-10	38688014	38691518	5523	132511	.
chr-10	38699770	38703266	5525	96217	.
chr-10	38713694	38715835	5526	98317	.
chr-10	38850768	38852994	5531	76674	.
chr-10	38929733	38932190	5538	91444	.
chr-10	39341702	39343673	5568	66293	.
chr-10	39597576	39601067	5583	124812	.
chr-10	39773138	39774245	5603	121444	.
chr-10	39779672	39781790	5604	117600	.
chr-10	40680660	40683720	5625	105464	.
chr-10	40850452	40858672	5633	217784	.
chr-10	40945776	40949413	5638	160016	.
chr-10	41234809	41236834	5654	81877	.
chr-10	41412232	41415068	5670	128394	.
chr-10	41752042	41753933	5688	122484	.
chr-10	41829779	41832112	5694	80892	.
chr-10	43518006	43520255	5752	95763	.
chr-10	43750794	43754647	5773	90088	.
chr-10	43822159	43824346	5781	101515	.
chr-10	44086031	44087743	5794	68766	.
chr-10	44088737	44091121	5795	153343	.
chr-10	44300757	44302750	5819	86912	.
chr-10	44551871	44555939	5842	157766	.
chr-10	44567637	44570268	5843	97817	.
chr-10	44573417	44576324	5844	103245	.
chr-10	44800916	44804358	5864	95098	.
chr-10	44888386	44891761	5873	75754	.
chr-10	45259235	45263277	5898	138146	.
chr-10	45466996	45469381	5916	110426	.
chr-10	45783656	45787068	5941	78590	.
chr-10	45938199	45941754	5950	108286	.
chr-10	45950570	45951804	5951	70662	.
chr-10	46112868	46118465	5967	143941	.
chr-10	46231196	46234663	5979	73765	.
chr-10	46240380	46243949	5980	67580	.
chr-10	46557146	46558761	5999	90322	.
chr-10	46972669	46975284	6013	71593	.
chr-10	47236665	47240359	6024	187049	.
chr-10	47247325	47250162	6025	118459	.
chr-10	47404055	47407731	6042	92759	.
chr-10	47424247	47426578	6044	98951	.
chr-10	49300702	49302946	6119	124308	.
chr-10	49780424	49783906	6144	125026	.
chr-10	49914610	49921564	6155	222123	.
chr-10	51155846	51160074	6189	149679	.
chr-10	51180254	51183432	6194	120690	.
chr-10	51185033	51188495	6195	184998	.
chr-10	51193890	51195569	6198	73531	.
chr-10	51282715	51286038	6206	97322	.
chr-10	51535066	51537563	6225	69939	.
chr-10	51569694	51572690	6228	98926	.
chr-10	51581921	51584722	6231	100081	.
chr-10	51678880	51680094	6237	145019	.
chr-10	51852768	51854301	6249	78069	.
chr-10	52182353	52186239	6277	104930	.
chr-10	52689702	52693654	6290	90697	.
chr-10	53402923	53405084	6329	89074	.
chr-10	53610227	53613555	6332	88976	.
chr-10	53621475	53623468	6334	161325	.
chr-10	53834269	53835590	6348	136177	.
chr-10	53944246	53948811	6353	123726	.
chr-10	54432521	54436773	6368	102349	.
chr-11	1175442	1179351	6403	70520	.
chr-11	1344695	1346295	6414	71647	.
chr-11	1385489	1387384	6419	65611	.
chr-11	1599887	1602545	6428	89349	.
chr-11	1681588	1683967	6439	79349	.
chr-11	1688056	1690129	6441	77129	.
chr-11	1968840	1972603	6451	90656	.
chr-11	2317870	2320540	6470	135889	.
chr-11	2533470	2536217	6481	93632	.
chr-11	2680385	2683267	6493	114639	.
chr-11	2709377	2713331	6495	92612	.
chr-11	3132104	3133278	6523	109471	.
chr-11	3276054	3278729	6532	83266	.
chr-11	3364447	3366336	6542	69825	.
chr-11	3542260	3544909	6551	67033	.
chr-11	4259766	4263575	6577	89838	.
chr-11	4671318	4675359	6598	112700	.
chr-11	4708591	4711145	6601	113882	.
chr-11	4815177	4817282	6610	97612	.
chr-11	5027790	5030198	6621	83627	.
chr-11	5239573	5241770	6626	101339	.
chr-11	5696407	5698422	6649	99282	.
chr-11	5710401	5713264	6653	82869	.
chr-11	6190117	6195703	6676	262597	.
chr-11	6207153	6211387	6680	104953	.
chr-11	6230955	6234164	6683	123889	.
chr-11	6250732	6255317	6686	156172	.
chr-11	6492055	6495839	6701	163914	.
chr-11	6576704	6580156	6709	129559	.
chr-11	6958865	6962108	6730	105075	.
chr-11	7003292	7005125	6734	83263	.
chr-11	7020181	7022538	6736	80395	.
chr-11	7022735	7025272	6737	113931	.
chr-11	7109385	7113164	6741	116694	.
chr-11	7235775	7237413	6755	111671	.
chr-11	7346479	7350172	6762	118698	.
chr-11	7369572	7371563	6766	78648	.
chr-11	7558918	7564102	6773	183062	.
chr-11	7759274	7762720	6783	79218	.
chr-11	7805894	7809257	6789	71858	.
chr-11	7868485	7870993	6799	66879	.
chr-11	8059202	8062477	6810	80854	.
chr-11	8090222	8094341	6811	154196	.
chr-11	8177686	8181559	6821	109831	.
chr-11	8218672	8220780	6824	80422	.
chr-11	8255301	8259223	6828	114305	.
chr-11	8332530	8333699	6835	77236	.
chr-11	8335414	8342517	6836	231174	.
chr-11	8425889	8427833	6844	126705	.
chr-11	8765996	8767799	6861	92132	.
chr-11	9036266	9038919	6884	130780	.
chr-11	9235463	9237948	6895	91065	.
chr-11	9239347	9242340	6896	99689	.
chr-11	9575379	9577919	6922	70504	.
chr-11	9719393	9721644	6932	189899	.
chr-11	9860478	9862557	6944	79478	.
chr-11	10024252	10026840	6957	81536	.
chr-11	10099442	10103070	6963	201927	.
chr-11	10406870	10409098	6996	73521	.
chr-11	10434194	10435891	6999	92660	.
chr-11	10454974	10457696	7002	89470	.
chr-11	10779817	10784056	7023	95970	.
chr-11	11080769	11086987	7041	160332	.
chr-11	11336803	11342118	7061	102698	.
chr-11	11602365	11605774	7069	79264	.
chr-11	11811873	11814223	7074	106205	.
chr-11	12142016	12145567	7085	125712	.
chr-11	12308398	12310252	7106	76335	.
chr-11	12564819	12567095	7121	79407	.
chr-11	12924374	12928064	7133	127961	.
chr-11	13015845	13019872	7139	80727	.
chr-11	13257587	13260846	7145	104541	.
chr-11	13486369	13488296	7157	79699	.
chr-11	13547475	13550713	7166	117543	.
chr-11	13863773	13866205	7182	97366	.
chr-11	13884585	13886208	7185	67009	.
chr-11	13912024	13914363	7189	68224	.
chr-11	14166234	14169988	7196	127097	.
chr-11	14206480	14210300	7200	148089	.
chr-11	14260608	14262535	7206	69062	.
chr-11	14333479	14335136	7212	78903	.
chr-11	14361450	14363892	7215	107778	.
chr-11	14384981	14386886	7217	84478	.
chr-11	14662044	14665790	7238	166483	.
chr-11	14673342	14675149	7242	68251	.
chr-11	15519588	15523477	7283	137732	.
chr-11	15845195	15847572	7294	88101	.
chr-11	15893995	15898448	7300	96811	.
chr-11	16066770	16068802	7309	72669	.
chr-11	16638801	16641868	7338	74309	.
chr-11	17076283	17078343	7351	95499	.
chr-11	17219816	17221501	7360	103832	.
chr-11	17701913	17705306	7373	128995	.
chr-11	18130246	18131837	7398	89030	.
chr-11	18348241	18350665	7412	68619	.
chr-11	18629539	18632734	7427	138141	.
chr-11	18709658	18711578	7434	74969	.
chr-11	19126869	19128839	7456	72473	.
chr-11	19363544	19366166	7462	116472	.
chr-11	19379835	19382958	7463	112386	.
chr-11	19654775	19658621	7489	130079	.
chr-11	19861361	19864045	7496	70378	.
chr-11	20450193	20453079	7523	114770	.
chr-11	20845495	20846880	7552	98102	.
chr-11	21228851	21229773	7575	101274	.
chr-11	21419370	21420602	7590	113601	.
chr-11	21646296	21650463	7600	105914	.
chr-11	21983283	21988198	7603	91752	.
chr-11	22257491	22259388	7619	90879	.
chr-11	22284780	22287054	7623	72632	.
chr-11	22380652	22386001	7634	225390	.
chr-11	22801342	22804342	7651	132875	.
chr-11	23504653	23506110	7682	72037	.
chr-11	23867759	23871204	7693	136054	.
chr-11	23991964	23995550	7705	81458	.
chr-11	24282168	24285404	7718	96103	.
chr-11	24290602	24294760	7719	118690	.
chr-11	25851125	25853166	7774	120246	.
chr-11	25894949	25898084	7781	106367	.
chr-11	25974907	25977240	7791	130025	.
chr-11	25983785	25985802	7793	83720	.
chr-11	25999132	26001453	7795	130110	.
chr-11	26019810	26021732	7797	72227	.
chr-11	26936409	26940387	7836	90229	.
chr-11	26992922	26996505	7843	86728	.
chr-11	27268735	27272385	7855	86042	.
chr-11	27542891	27544775	7873	83170	.
chr-11	27835443	27838678	7883	151581	.
chr-11	27863818	27867484	7886	104679	.
chr-11	27887401	27890769	7890	128538	.
chr-11	27905588	27909226	7891	109983	.
chr-11	28178103	28182559	7902	124097	.
chr-11	28258976	28260807	7905	95681	.
chr-11	28499859	28503595	7921	108227	.
chr-11	30491765	30494592	7971	252737	.
chr-11	30566192	30567575	7980	85548	.
chr-11	30839360	30841552	7989	67409	.
chr-11	30842969	30846470	7990	76767	.
chr-11	30857164	30860649	7993	139505	.
chr-11	31420469	31424557	8016	84950	.
chr-11	31806254	31809949	8025	117802	.
chr-11	32232565	32233346	8037	123409	.
chr-11	32252071	32254250	8040	71763	.
chr-11	32878518	32882394	8084	82588	.
chr-11	34028996	34033064	8124	76190	.
chr-11	34050277	34052088	8125	99553	.
chr-11	34080616	34083092	8130	78370	.
chr-11	34327641	34329566	8137	92825	.
chr-11	34341093	34343346	8140	106309	.
chr-11	34404550	34408254	8146	172761	.
chr-11	34484284	34486233	8151	95411	.
chr-11	34725456	34728812	8164	87548	.
chr-11	35000083	35002878	8174	104166	.
chr-11	35003900	35006520	8175	92426	.
chr-11	35077740	35079557	8180	90398	.
chr-11	35275980	35278366	8188	82715	.
chr-11	35326469	35330773	8193	122450	.
chr-11	35481000	35483112	8202	92684	.
chr-11	35575203	35578051	8208	112879	.
chr-11	35766810	35768661	8216	92578	.
chr-11	36954406	36957467	8268	138936	.
chr-11	37161631	37164064	8274	81053	.
chr-11	37539587	37541501	8289	198029	.
chr-11	37592682	37593957	8299	93224	.
chr-11	38032876	38035273	8325	66333	.
chr-11	38065299	38065935	8328	101027	.
chr-11	38191571	38193571	8340	161077	.
chr-11	38198261	38202440	8342	114364	.
chr-11	38235457	38236557	8346	113550	.
chr-11	38255275	38257580	8347	69338	.
chr-11	38258241	38260752	8348	94496	.
chr-11	38511139	38514427	8357	74472	.
chr-11	38884440	38887609	8383	96414	.
chr-11	38888494	38890321	8384	101871	.
chr-11	38929518	38933107	8389	121404	.
chr-11	39218019	39221629	8397	134611	.
chr-11	40515858	40519397	8456	82763	.
chr-11	40580857	40582556	8461	99877	.
chr-11	40730328	40734302	8474	136952	.
chr-11	40750309	40754066	8478	104196	.
chr-11	40790601	40792329	8481	96816	.
chr-11	41969457	41972670	8535	126978	.
chr-11	42228739	42232601	8540	131540	.
chr-11	42361200	42362613	8543	80630	.
chr-11	42434369	42440712	8548	231380	.
chr-11	42449651	42451979	8551	96319	.
chr-11	42821101	42823084	8583	83534	.
chr-11	43074957	43077181	8607	128612	.
chr-11	43265460	43268934	8617	78243	.
chr-11	43440987	43443422	8631	76366	.
chr-11	44016291	44020383	8665	103899	.
chr-11	44215484	44219818	8682	152002	.
chr-11	44263330	44264354	8690	81650	.
chr-11	44674938	44678310	8708	76348	.
chr-11	44686291	44688455	8711	66370	.
chr-11	45614070	45618771	8759	245796	.
chr-11	45660485	45662394	8763	118759	.
chr-11	46083851	46086763	8783	153998	.
chr-11	46098267	46100433	8787	77843	.
chr-11	46115656	46118162	8789	99109	.
chr-11	46194473	46196820	8795	74968	.
chr-11	46334340	46336357	8806	75738	.
chr-11	46531648	46534239	8820	70474	.
chr-11	46575171	46579032	8823	89325	.
chr-11	46765785	46770860	8829	109977	.
chr-11	46913674	46916808	8836	184776	.
chr-11	46990187	46993900	8844	92839	.
chr-11	47306413	47308899	8858	104110	.
chr-11	47345491	47348397	8862	180008	.
chr-11	47370170	47372849	8869	81179	.
chr-11	47425043	47429061	8874	89848	.
chr-11	48034258	48037805	8907	170769	.
chr-11	48073756	48076124	8912	76892	.
chr-11	48076663	48078526	8913	116983	.
chr-11	48140071	48142914	8920	153972	.
chr-11	48235315	48237045	8930	79327	.
chr-11	48402009	48404594	8942	102841	.
chr-11	48442966	48446361	8946	87538	.
chr-11	48878893	48881950	8962	124557	.
chr-11	49156463	49159076	8974	80639	.
chr-11	49199292	49201803	8983	118390	.
chr-11	49885259	49887062	9018	76007	.
chr-11	49995132	49998994	9032	106463	.
chr-11	50032082	50035551	9034	105102	.
chr-11	50308434	50310101	9049	109784	.
chr-11	50350423	50352400	9050	70481	.
chr-11	50487277	50490701	9055	125051	.
chr-11	50645408	50646557	9063	153850	.
chr-11	50659157	50660996	9066	65169	.
chr-11	50784420	50788259	9070	145313	.
chr-11	50965384	50968937	9075	83478	.
chr-11	51042017	51043985	9078	122813	.
chr-11	51327509	51328815	9088	63861	.
chr-11	51375111	51378926	9093	110922	.
chr-11	51983890	51991370	9112	229745	.
chr-11	51993971	51998222	9113	117126	.
chr-11	52032864	52035101	9116	62047	.
chr-11	52556494	52558825	9158	84905	.
chr-11	53012145	53015797	9169	106144	.
chr-11	53028257	53031117	9171	70205	.
chr-11	53058647	53062474	9174	121977	.
chr-11	53101932	53106775	9176	126546	.
chr-11	53335851	53339438	9189	167120	.
chr-11	53475053	53477781	9195	84573	.
chr-11	53629694	53632783	9206	66868	.
chr-11	54017009	54019805	9230	88865	.
chr-11	54042853	54045693	9236	91786	.
chr-11	54104639	54105838	9244	82661	.
chr-11	54133916	54137095	9249	76845	.
chr-11	54215252	54217383	9259	64967	.
chr-11	54224223	54226123	9261	89313	.
chr-11	54391341	54395343	9269	111614	.
chr-11	54930612	54934443	9301	154738	.
chr-11	54979516	54983317	9303	166702	.
chr-11	55115316	55119048	9313	116911	.
chr-11	55147002	55152389	9318	294673	.
chr-11	55896158	55899529	9366	121359	.
chr-11	55945597	55948652	9370	90189	.
chr-11	55966497	55969032	9372	67798	.
chr-12	356700	360208	9393	101724	.
chr-12	625659	628688	9405	72609	.
chr-12	913476	915313	9423	63695	.
chr-12	973386	974058	9429	88316	.
chr-12	1207356	1210374	9440	134684	.
chr-12	1213691	1217382	9441	118171	.
chr-12	1350423	1353187	9450	175525	.
chr-12	1896783	1898868	9476	102839	.
chr-12	1909432	1910622	9480	82936	.
chr-12	2187287	2189918	9493	88547	.
chr-12	2411686	2414035	9510	92542	.
chr-12	2418207	2420538	9511	91094	.
chr-12	3223908	3226018	9562	92975	.
chr-12	3302755	3308636	9569	135174	.
chr-12	3579679	3584150	9587	118577	.
chr-12	3655806	3661304	9594	242385	.
chr-12	3663659	3669081	9595	185995	.
chr-12	3680534	3682713	9597	112876	.
chr-12	3686744	3688295	9599	76508	.
chr-12	3702414	3703363	9601	159799	.
chr-12	3791119	3794860	9611	230681	.
chr-12	3808465	3813194	9614	224578	.
chr-12	4256743	4260053	9632	78448	.
chr-12	4425824	4428187	9640	77251	.
chr-12	4665497	4667633	9654	123450	.
chr-12	4796802	4803856	9665	117968	.
chr-12	5030833	5032702	9689	71460	.
chr-12	5032922	5034608	9690	88715	.
chr-12	5219789	5221881	9700	101823	.
chr-12	5494053	5496218	9715	85168	.
chr-12	5646978	5648698	9727	77177	.
chr-12	5709195	5713926	9732	172760	.
chr-12	6045642	6049794	9750	125096	.
chr-12	6069906	6073208	9751	131557	.
chr-12	6084001	6087018	9755	148988	.
chr-12	6372664	6376136	9770	141053	.
chr-12	6802873	6803519	9788	109362	.
chr-12	6860225	6863572	9795	91637	.
chr-12	7006314	7010724	9805	155893	.
chr-12	7036270	7039957	9808	111584	.
chr-12	7123595	7127081	9813	138504	.
chr-12	7763259	7766416	9836	86154	.
chr-12	7787033	7791190	9838	104815	.
chr-12	7951299	7952354	9846	130001	.
chr-12	8131358	8134089	9854	109302	.
chr-12	8257312	8258872	9862	74208	.
chr-12	8601214	8603067	9868	95128	.
chr-12	8752781	8754835	9872	74696	.
chr-12	9264895	9266688	9893	70044	.
chr-12	9333535	9335829	9903	235266	.
chr-12	9343489	9346870	9905	125182	.
chr-12	9590108	9592067	9916	84967	.
chr-12	9624657	9629016	9919	99917	.
chr-12	9759851	9763090	9930	99239	.
chr-12	9944787	9947809	9935	121213	.
chr-12	10029132	10030448	9944	70399	.
chr-12	10053106	10057366	9949	145794	.
chr-12	10517817	10519386	9961	74149	.
chr-12	10521801	10524459	9962	81583	.
chr-12	11047437	11050104	9985	85081	.
chr-12	11096424	11098395	9991	110089	.
chr-12	11638993	11642301	10009	234859	.
chr-12	11646815	11649239	10011	95350	.
chr-12	11833526	11840957	10014	190415	.
chr-12	11869781	11870966	10017	113117	.
chr-12	11871762	11872903	10018	118978	.
chr-12	11915994	11918573	10023	101253	.
chr-12	12163592	12165682	10034	70624	.
chr-12	12174534	12177626	10036	96280	.
chr-12	12561470	12563782	10050	106030	.
chr-12	12651351	12653648	10056	78913	.
chr-12	13033945	13037539	10091	112330	.
chr-12	13339174	13342106	10102	97112	.
chr-12	13345552	13347756	10103	86325	.
chr-12	13359175	13363274	10107	230320	.
chr-12	13368608	13370352	10110	102193	.
chr-12	13382025	13386760	10115	229268	.
chr-12	13411751	13416203	10117	176318	.
chr-12	13481140	13483274	10122	118665	.
chr-12	13497033	13498220	10125	117766	.
chr-12	13503229	13506107	10126	115735	.
chr-12	13612682	13614268	10141	76611	.
chr-12	13644733	13646771	10148	107285	.
chr-12	13971514	13973454	10170	74757	.
chr-12	13979411	13982818	10172	96372	.
chr-12	14295866	14300765	10185	186500	.
chr-12	14310680	14311915	10188	104516	.
chr-12	14336146	14336929	10193	86693	.
chr-12	14340510	14344344	10195	101224	.
chr-12	15027006	15030047	10223	90628	.
chr-12	15227213	15228772	10234	83400	.
chr-12	15649700	15651435	10259	72021	.
chr-12	16112178	16115442	10271	153796	.
chr-12	16169597	16172660	10275	118872	.
chr-12	16282651	16286580	10281	139014	.
chr-12	16289564	16292140	10282	182954	.
chr-12	16468619	16476000	10290	159149	.
chr-12	17209309	17212458	10322	111123	.
chr-12	17224495	17226793	10326	145334	.
chr-12	17228365	17232460	10327	293630	.
chr-12	17257046	17259175	10332	109236	.
chr-12	17432590	17435300	10341	86113	.
chr-12	17631762	17635338	10347	143549	.
chr-12	18024663	18027764	10368	105755	.
chr-12	18672478	18676404	10403	107768	.
chr-12	19012115	19014074	10422	61645	.
chr-12	19072009	19074544	10429	92556	.
chr-12	19150163	19154754	10433	147281	.
chr-12	19219616	19223612	10439	68070	.
chr-12	19487051	19489651	10451	75966	.
chr-12	19755796	19757580	10470	91212	.
chr-12	19763814	19766138	10472	87719	.
chr-12	19792447	19794905	10476	80520	.
chr-12	19843959	19850757	10480	187474	.
chr-12	19959601	19965067	10488	222589	.
chr-12	20579312	20581620	10516	118999	.
chr-12	20598131	20603270	10518	108722	.
chr-12	20840271	20842546	10525	90096	.
chr-12	21118127	21120314	10535	77115	.
chr-12	21294063	21297689	10541	246886	.
chr-12	21321892	21323643	10547	83629	.
chr-12	21333022	21335544	10549	180006	.
chr-12	21341278	21344900	10550	164213	.
chr-12	21355276	21357815	10552	200514	.
chr-12	21380974	21383557	10560	70238	.
chr-12	22052226	22056968	10594	120453	.
chr-12	22183311	22186224	10602	107973	.
chr-12	22375710	22380315	10607	197826	.
chr-12	22387796	22393374	10609	200258	.
chr-12	22410680	22413272	10614	136370	.
chr-12	22656823	22659874	10631	67374	.
chr-12	23037345	23041223	10640	66580	.
chr-12	23101132	23103915	10646	78466	.
chr-12	23238565	23239237	10652	86765	.
chr-12	23400372	23402360	10656	80408	.
chr-12	23471888	23474633	10659	89846	.
chr-12	23749611	23753075	10665	123282	.
chr-12	23909426	23912000	10675	75347	.
chr-12	24237796	24240769	10692	138520	.
chr-12	24366450	24368477	10704	86558	.
chr-12	24419258	24422448	10711	86919	.
chr-12	24492481	24495253	10721	460521	.
chr-12	24806669	24808531	10733	75130	.
chr-12	24825804	24829665	10735	137997	.
chr-12	25060195	25062139	10751	75989	.
chr-12	26004322	26007871	10801	81487	.
chr-12	26161575	26164254	10812	106284	.
chr-12	26337093	26339378	10820	82323	.
chr-12	26618826	26620080	10831	88551	.
chr-12	26776304	26778454	10845	91308	.
chr-12	26983514	26985463	10856	87133	.
chr-12	27226011	27229108	10865	79995	.
chr-12	27252378	27255272	10866	76349	.
chr-12	27368575	27370660	10868	114351	.
chr-12	27390531	27395671	10870	225467	.
chr-12	28175409	28179096	10897	89354	.
chr-12	28360414	28364146	10906	100789	.
chr-12	29160546	29163001	10936	92024	.
chr-12	30035863	30038870	10974	166522	.
chr-12	30109432	30113097	10982	120000	.
chr-12	30197328	30201738	10985	131202	.
chr-12	30575167	30577897	10991	77624	.
chr-12	30586793	30588320	10994	83590	.
chr-12	30634877	30640561	11003	146690	.
chr-12	30657591	30660532	11005	86285	.
chr-12	32646349	32650456	11070	106432	.
chr-12	33450696	33453878	11092	70002	.
chr-12	33590209	33595263	11098	97637	.
chr-12	33805879	33807093	11105	73531	.
chr-12	33913805	33916630	11109	128316	.
chr-12	34291949	34294093	11129	67062	.
chr-12	34417485	34420317	11142	102879	.
chr-12	34458877	34461825	11144	94487	.
chr-12	34474713	34476513	11147	105195	.
chr-12	35532219	35533883	11187	80861	.
chr-12	35541997	35545000	11188	152738	.
chr-12	36285351	36286670	11220	149714	.
chr-12	36322299	36323672	11227	82882	.
chr-12	36402165	36404762	11231	83387	.
chr-12	36697187	36700168	11239	75826	.
chr-12	37285261	37289039	11255	94631	.
chr-12	37550838	37554373	11269	93773	.
chr-12	37629771	37635359	11274	157833	.
chr-12	37643821	37647210	11277	125695	.
chr-12	38214660	38217722	11317	82573	.
chr-12	38471108	38474064	11327	79110	.
chr-12	38844138	38846221	11354	175735	.
chr-12	38848630	38850516	11356	96735	.
chr-12	39431686	39434539	11384	114862	.
chr-12	40422191	40425158	11414	99159	.
chr-12	40549876	40553688	11423	192627	.
chr-12	40996235	40998180	11438	125210	.
chr-12	41063558	41066469	11449	82440	.
chr-12	43272820	43275445	11541	149934	.
chr-12	43292019	43296138	11546	139924	.
chr-12	43309942	43313834	11548	88283	.
chr-12	43317337	43319495	11550	72309	.
chr-12	43596340	43599806	11569	92116	.
chr-12	43607066	43610910	11571	123148	.
chr-12	43626883	43628999	11573	96056	.
chr-12	43813548	43815376	11585	77368	.
chr-12	46393393	46397018	11681	164193	.
chr-12	46436472	46440190	11685	126101	.
chr-12	46656710	46658657	11692	130400	.
chr-12	47047424	47050876	11709	133357	.
chr-12	47474089	47476601	11729	76902	.
chr-12	47479847	47482379	11730	69932	.
chr-12	47532205	47535593	11737	127249	.
chr-12	47602402	47608322	11748	248582	.
chr-12	48208334	48210998	11772	94756	.
chr-12	48562862	48563845	11783	124439	.
chr-12	49440825	49446136	11829	157425	.
chr-12	49474294	49475999	11833	74947	.
chr-12	49526247	49530000	11837	114246	.
chr-12	49554969	49557086	11840	68911	.
chr-12	49667454	49670105	11847	96581	.
chr-12	49919592	49921766	11864	134003	.
chr-12	49921939	49924994	11865	102838	.
chr-12	49929451	49931654	11866	76792	.
chr-12	49957905	49962858	11870	215262	.
chr-12	50303057	50307485	11893	126823	.
chr-12	50782197	50783638	11922	107397	.
chr-12	50879317	50883078	11929	171083	.
chr-12	51255258	51257172	11947	87812	.
chr-12	51273640	51276872	11950	131472	.
chr-12	51310391	51313991	11953	105628	.
chr-12	51626154	51630956	11981	236224	.
chr-12	51729414	51732749	11987	164570	.
chr-12	52085847	52088223	12004	126528	.
chr-12	53303403	53308237	12056	134935	.
chr-12	53397557	53401276	12064	99928	.
chr-12	53432338	53436868	12069	210996	.
chr-12	54212998	54217322	12105	230106	.
chr-12	54495024	54499398	12110	107124	.
chr-12	54556930	54559141	12116	86892	.
chr-12	55141474	55145542	12139	89665	.
chr-12	55380118	55382169	12150	67345	.
chr-12	55882954	55885413	12173	72305	.
chr-12	56120052	56122656	12187	111197	.
chr-12	56548368	56550883	12198	79322	.
chr-12	56689658	56691827	12207	70347	.
chr-12	56886567	56889022	12214	86282	.
chr-12	56920780	56922674	12218	89063	.
chr-12	56947403	56950961	12220	120977	.
chr-12	57007042	57010492	12223	81096	.
chr-12	57171779	57174951	12234	127570	.
chr-12	57329624	57331979	12241	109954	.
chr-12	57594844	57598174	12260	111666	.
chr-12	57736261	57738157	12275	68740	.
chr-12	58415898	58418071	12300	145954	.
chr-12	59221960	59223738	12321	81748	.
chr-12	59457594	59461599	12336	199213	.
chr-12	59785552	59792061	12358	211256	.
chr-12	59915601	59918556	12371	104859	.
chr-12	59928413	59932467	12374	111677	.
chr-12	60326129	60328787	12393	105132	.
chr-12	60336621	60339624	12396	124900	.
chr-12	60342047	60344357	12397	136423	.
chr-12	60574391	60576865	12405	93064	.
chr-12	60926364	60931031	12432	100525	.
chr-12	61502168	61504622	12455	143849	.
chr-12	61524786	61526586	12459	110004	.
chr-12	62005698	62008200	12486	76096	.
chr-12	62086226	62088694	12493	99039	.
chr-12	62107062	62108623	12496	69613	.
chr-12	62113757	62118597	12498	137645	.
chr-12	62145707	62148409	12500	343237	.
chr-12	62535089	62537853	12510	126867	.
chr-12	62559121	62563378	12514	355593	.
chr-12	62563544	62565255	12515	121659	.
chr-12	62653550	62659143	12527	120280	.
chr-12	63084994	63088806	12544	127691	.
chr-12	63376413	63380494	12556	148353	.
chr-12	63644355	63648296	12569	185413	.
chr-12	63818850	63820759	12585	79455	.
chr-12	63849875	63852966	12590	108091	.
chr-12	64066378	64070038	12603	107188	.
chr-12	64127325	64129241	12609	86554	.
chr-12	64270833	64274594	12623	84832	.
chr-12	64338203	64341051	12628	80287	.
chr-12	64403059	64405507	12636	101672	.
chr-12	64683114	64684781	12651	111653	.
chr-12	64766525	64768560	12653	71704	.
chr-12	65242392	65245181	12673	78154	.
chr-12	65589502	65591664	12698	74851	.
chr-12	66041139	66042920	12717	82890	.
chr-12	66063305	66065666	12720	107589	.
chr-12	66246292	66249532	12735	123535	.
chr-12	66254753	66256386	12737	67084	.
chr-12	66297877	66300109	12742	87299	.
chr-12	66350749	66352597	12747	81102	.
chr-12	66521576	66525690	12758	85695	.
chr-12	66867278	66869015	12771	82753	.
chr-12	67035869	67038195	12784	106263	.
chr-12	67192924	67196865	12789	147797	.
chr-12	67552948	67554748	12809	65280	.
chr-12	67859709	67862259	12838	94999	.
chr-12	67916966	67919486	12849	130804	.
chr-12	67951618	67954061	12854	101675	.
chr-12	68030381	68033915	12858	82550	.
chr-12	68294887	68298768	12883	87137	.
chr-12	68482424	68485047	12892	78458	.
chr-12	68504741	68507131	12896	93654	.
chr-12	68533692	68536325	12900	86824	.
chr-12	68562278	68564110	12905	114306	.
chr-12	68697636	68699011	12916	84992	.
chr-12	69021891	69025785	12938	120754	.
chr-12	69319163	69322980	12975	112841	.
chr-12	69690708	69693387	12992	110002	.
chr-12	69727752	69731541	12996	94082	.
chr-12	69896058	69898537	13000	103691	.
chr-12	69962181	69964391	13006	66656	.
chr-12	69965893	69967013	13008	90832	.
chr-12	70016170	70020346	13011	131612	.
chr-12	70472190	70473940	13040	84444	.
chr-12	70498151	70500171	13044	87779	.
chr-12	70510475	70513438	13046	128046	.
chr-12	70526041	70528465	13048	120218	.
chr-12	70671789	70674670	13061	75562	.
chr-12	70938038	70943626	13069	189401	.
chr-12	70996292	70999867	13073	178641	.
chr-12	71303665	71305506	13084	75684	.
chr-12	71868267	71869935	13099	96585	.
chr-12	71953823	71955873	13104	83363	.
chr-12	72034570	72038554	13114	148935	.
chr-12	72239257	72241207	13119	116589	.
chr-12	72350272	72353512	13125	146267	.
chr-12	72443534	72445976	13129	83438	.
chr-12	72584331	72588259	13141	136704	.
chr-12	72683715	72685706	13149	81857	.
chr-12	72913872	72915016	13154	123767	.
chr-12	72976419	72980528	13156	177485	.
chr-12	73010783	73013709	13159	86191	.
chr-12	73017567	73018848	13160	69722	.
chr-12	73051666	73056341	13162	107225	.
chr-12	73067506	73071690	13165	97589	.
chr-12	73133298	73136196	13169	81247	.
chr-12	73501125	73505741	13179	105019	.
chr-12	73803220	73806798	13193	147912	.
chr-12	74046282	74048764	13201	96143	.
chr-12	74049201	74052286	13202	116520	.
chr-12	74160342	74164536	13211	149591	.
chr-12	74632507	74637137	13231	125549	.
chr-12	74731090	74734090	13237	132954	.
chr-12	74944443	74947120	13255	77559	.
chr-12	75011303	75014742	13259	148840	.
chr-12	75038090	75041657	13264	100746	.
chr-12	75167112	75170416	13267	71037	.
chr-12	75186132	75187849	13271	98320	.
chr-12	75296574	75298072	13273	77506	.
chr-12	75298237	75299784	13274	111470	.
chr-12	75511441	75513459	13283	104285	.
chr-12	76101428	76105042	13309	79459	.
chr-12	76165963	76167999	13313	106227	.
chr-12	76174330	76177069	13315	83846	.
chr-12	76217113	76221473	13316	143157	.
chr-12	76321269	76324095	13323	97640	.
chr-12	76437934	76439861	13328	102759	.
chr-12	76446086	76449624	13329	153232	.
chr-12	76634899	76638481	13346	121361	.
chr-12	76643061	76647233	13347	171812	.
chr-12	76654663	76658581	13348	217936	.
chr-12	76850768	76852035	13360	190144	.
chr-12	76912337	76914969	13369	99990	.
chr-12	77016487	77019818	13379	81877	.
chr-12	77047590	77050649	13385	202405	.
chr-12	77246027	77252142	13398	202087	.
chr-12	77635004	77639686	13427	155888	.
chr-12	78093934	78095254	13444	80072	.
chr-12	78297137	78301081	13465	94367	.
chr-12	78493172	78495823	13481	76500	.
chr-12	78510698	78512327	13484	107627	.
chr-12	78523853	78527382	13488	125528	.
chr-12	78663770	78666637	13496	83615	.
chr-12	78670513	78673052	13498	68761	.
chr-12	78913081	78914537	13513	76343	.
chr-12	79175789	79178727	13540	78426	.
chr-12	79411879	79414107	13553	137552	.
chr-12	79445504	79447033	13558	92489	.
chr-12	79461695	79466302	13563	178502	.
chr-12	79476834	79478753	13565	80322	.
chr-12	79818023	79819955	13580	90482	.
chr-12	79825924	79829389	13582	94006	.
chr-12	79875808	79878628	13584	141583	.
chr-12	80166293	80171417	13587	103765	.
chr-12	80247264	80249901	13592	68234	.
chr-12	80505913	80509629	13607	281475	.
chr-12	80519353	80520874	13610	121145	.
chr-12	81005245	81007919	13635	149331	.
chr-12	81033538	81034808	13638	118524	.
chr-12	81176754	81179740	13647	79966	.
chr-12	81514584	81518961	13657	71592	.
chr-12	81553051	81556538	13660	134687	.
chr-12	81687913	81690559	13669	107945	.
chr-12	82217503	82219541	13683	193042	.
chr-12	82219764	82224133	13684	130588	.
chr-12	82471458	82475683	13700	116808	.
chr-12	82589465	82593133	13706	130030	.
chr-12	82597165	82599671	13708	99010	.
chr-12	82605485	82608500	13710	108289	.
chr-12	82702780	82706615	13717	104087	.
chr-12	82766970	82769740	13720	137228	.
chr-12	82770618	82772948	13721	71868	.
chr-12	82773177	82775788	13722	111803	.
chr-12	82790890	82793198	13726	100667	.
chr-12	82819143	82824081	13730	144988	.
chr-12	83184022	83189081	13747	124102	.
chr-12	83189483	83191661	13748	84918	.
chr-12	83378707	83381947	13759	70396	.
chr-12	83472215	83475332	13767	86305	.
chr-12	83544463	83547502	13776	104447	.
chr-12	83741393	83745239	13787	136606	.
chr-12	83778034	83781299	13792	115120	.
chr-12	84083876	84086452	13809	94131	.
chr-12	84372338	84373905	13826	70511	.
chr-12	84428486	84432309	13834	125652	.
chr-12	84856882	84859336	13838	105609	.
chr-12	84982010	84985225	13846	120635	.
chr-12	85410569	85413427	13864	86763	.
chr-12	85464907	85466503	13871	70461	.
chr-12	85494481	85498525	13875	158426	.
chr-12	85557403	85561032	13877	115752	.
chr-12	85672992	85677209	13885	105971	.
chr-13	409674	413058	13913	116621	.
chr-13	445410	448179	13920	103982	.
chr-13	458130	465007	13925	191994	.
chr-13	480961	482757	13930	91825	.
chr-13	510756	515252	13934	108445	.
chr-13	530406	532541	13936	117591	.
chr-13	751553	755121	13959	95439	.
chr-13	850443	852825	13968	68848	.
chr-13	1069826	1072200	13993	151915	.
chr-13	1137401	1140720	14002	84554	.
chr-13	1274162	1276830	14007	72818	.
chr-13	1592723	1597230	14022	139517	.
chr-13	1833653	1837306	14034	102253	.
chr-13	1969020	1971010	14036	142993	.
chr-13	1983069	1985631	14038	132482	.
chr-13	2095031	2099827	14044	167312	.
chr-13	2189943	2193782	14053	175414	.
chr-13	3117906	3123546	14086	168299	.
chr-13	3255325	3257154	14089	64519	.
chr-13	3276187	3279056	14092	113460	.
chr-13	3281858	3283942	14093	162450	.
chr-13	3638517	3643581	14108	96389	.
chr-13	3739400	3742667	14112	76101	.
chr-13	3749914	3751793	14113	80912	.
chr-13	4690960	4696557	14148	140653	.
chr-13	4754374	4758012	14155	216980	.
chr-13	5115397	5117711	14172	125441	.
chr-13	5155598	5158891	14176	108114	.
chr-13	5523781	5530166	14195	236224	.
chr-13	5616729	5619528	14197	106219	.
chr-13	5810427	5813129	14207	106840	.
chr-13	5918407	5921184	14215	92607	.
chr-13	5931238	5933246	14217	74479	.
chr-13	5934267	5936213	14218	82122	.
chr-13	6918958	6920067	14276	92705	.
chr-13	6946659	6950218	14281	131633	.
chr-13	7008287	7010234	14287	67905	.
chr-13	7010446	7012319	14288	62532	.
chr-13	7283188	7285599	14301	139261	.
chr-13	7310729	7314403	14305	90810	.
chr-13	7337983	7340854	14306	86939	.
chr-13	7342320	7346415	14307	113523	.
chr-13	7362709	7365471	14311	155367	.
chr-13	7872386	7875262	14333	279030	.
chr-13	8165584	8169183	14345	79470	.
chr-13	8390851	8394507	14361	114088	.
chr-13	8829236	8832718	14388	95496	.
chr-13	8921402	8924871	14394	87363	.
chr-13	9019439	9020632	14401	72447	.
chr-13	9088468	9091526	14405	190186	.
chr-13	9156248	9158869	14407	80179	.
chr-13	9221569	9223271	14410	75092	.
chr-13	9323333	9327214	14412	78498	.
chr-13	10271063	10273786	14462	124583	.
chr-13	10304255	10306178	14467	66306	.
chr-13	11453980	11457145	14496	85022	.
chr-13	11702520	11704389	14516	97668	.
chr-13	11719070	11721167	14517	96315	.
chr-13	12090016	12093797	14537	101673	.
chr-13	12217563	12219840	14541	120602	.
chr-13	12306803	12308877	14546	115777	.
chr-13	12386224	12388907	14551	85874	.
chr-13	12858652	12861578	14571	124457	.
chr-13	13847593	13854813	14624	258337	.
chr-13	13944106	13945947	14634	74256	.
chr-13	14556248	14559746	14667	96509	.
chr-13	15265606	15270890	14710	133884	.
chr-13	15380063	15383863	14712	81440	.
chr-13	15910184	15912155	14736	89991	.
chr-13	15932171	15934027	14742	88659	.
chr-13	16209636	16211484	14759	71202	.
chr-13	16892029	16893806	14803	86602	.
chr-13	17326251	17328677	14819	66449	.
chr-13	17360020	17364542	14823	145631	.
chr-13	18262459	18265099	14873	90396	.
chr-13	18446617	18448529	14883	73696	.
chr-13	18462289	18464152	14886	76894	.
chr-13	18482783	18484758	14887	107698	.
chr-13	19012856	19016141	14923	119460	.
chr-13	19738716	19740496	14969	73643	.
chr-13	20216092	20218427	14989	223269	.
chr-13	20393013	20394506	14993	119940	.
chr-13	20585750	20587734	15011	76352	.
chr-13	20783656	20789380	15030	120534	.
chr-13	20968785	20972677	15037	111310	.
chr-13	21030849	21034970	15042	115448	.
chr-13	21111078	21113743	15049	70818	.
chr-13	21292004	21294504	15064	78839	.
chr-13	21361129	21363962	15070	167927	.
chr-13	21889010	21892949	15095	160407	.
chr-13	22058396	22064732	15105	244987	.
chr-13	22085697	22090617	15108	276334	.
chr-13	22156342	22159620	15114	81497	.
chr-13	22527755	22530690	15132	71415	.
chr-13	22596604	22599745	15137	69930	.
chr-13	22877069	22880658	15154	109146	.
chr-13	22913511	22914868	15158	134568	.
chr-13	23157456	23165585	15165	229325	.
chr-13	23361381	23363770	15180	106764	.
chr-13	23497919	23500411	15184	69219	.
chr-13	24125877	24130173	15227	162947	.
chr-13	24463711	24467721	15232	120079	.
chr-13	24896059	24900046	15248	109823	.
chr-13	25542900	25546167	15264	142079	.
chr-13	25548201	25551774	15265	170976	.
chr-13	25722837	25725622	15280	125620	.
chr-13	25937026	25939129	15291	75441	.
chr-13	26473593	26475197	15307	128992	.
chr-13	26530205	26532798	15314	76624	.
chr-13	26632470	26635827	15321	66171	.
chr-13	26747598	26748734	15329	149499	.
chr-13	27305178	27307113	15351	74902	.
chr-13	28062332	28065439	15387	118877	.
chr-13	28561248	28562811	15415	89155	.
chr-13	28885018	28886918	15439	71004	.
chr-13	28980232	28984259	15444	141088	.
chr-13	29076097	29079054	15459	147721	.
chr-13	29105758	29108096	15462	102600	.
chr-13	29160143	29165279	15463	151353	.
chr-13	29216851	29223876	15466	245674	.
chr-13	29227666	29230708	15468	120447	.
chr-13	29350127	29351631	15477	149692	.
chr-13	29357360	29361435	15479	207336	.
chr-13	29369517	29371086	15482	113118	.
chr-13	29610199	29613225	15499	81050	.
chr-13	29636386	29638641	15500	85528	.
chr-13	29958548	29961773	15516	89026	.
chr-13	30206947	30210292	15531	93247	.
chr-13	30220901	30222674	15533	73117	.
chr-13	30578035	30579856	15551	71075	.
chr-13	30770673	30774143	15567	89658	.
chr-13	30889240	30890976	15578	90701	.
chr-13	31018360	31020190	15582	85858	.
chr-13	31508107	31510803	15595	73091	.
chr-13	32884416	32887232	15640	71478	.
chr-13	32954482	32957755	15645	121846	.
chr-13	34144207	34146039	15708	76130	.
chr-13	34240452	34243859	15710	98687	.
chr-13	34326542	34329381	15716	83013	.
chr-13	34564662	34566875	15720	72944	.
chr-13	34603550	34606291	15726	152109	.
chr-13	34648630	34652359	15729	172775	.
chr-13	34872878	34875783	15744	136256	.
chr-13	34915998	34918138	15748	77943	.
chr-13	35396799	35399810	15765	89776	.
chr-13	35993256	35996154	15795	91451	.
chr-13	36131350	36133278	15808	89602	.
chr-13	36554411	36556424	15833	87882	.
chr-13	36902735	36905449	15859	159860	.
chr-13	36950848	36952839	15864	93803	.
chr-13	36954260	36956254	15865	86155	.
chr-13	36961140	36963466	15867	71467	.
chr-13	37586188	37590380	15911	149839	.
chr-13	37714926	37716912	15925	108284	.
chr-13	37770657	37773130	15928	112611	.
chr-13	37813013	37815172	15934	85176	.
chr-13	38376865	38379813	15965	121957	.
chr-13	38589669	38593156	15976	86627	.
chr-13	39056400	39058335	16003	73848	.
chr-13	39108726	39110929	16005	98004	.
chr-13	39189744	39191672	16015	110426	.
chr-13	39262262	39264099	16020	92957	.
chr-13	39287821	39292105	16025	126927	.
chr-13	39555452	39557631	16032	120334	.
chr-13	39789259	39791217	16047	72242	.
chr-13	39937799	39942440	16057	188803	.
chr-13	41229080	41231191	16082	74786	.
chr-13	41914210	41915672	16123	76678	.
chr-13	41928862	41931550	16125	73301	.
chr-13	43288874	43291327	16157	96232	.
chr-13	43435721	43440784	16164	123430	.
chr-13	43490622	43492643	16168	127232	.
chr-13	44853658	44856475	16224	120173	.
chr-13	45057806	45060471	16233	88778	.
chr-13	45219676	45222263	16246	134910	.
chr-13	45223944	45227817	16247	170569	.
chr-13	45742930	45744975	16291	85807	.
chr-13	45821719	45824484	16298	154424	.
chr-13	46729030	46731074	16338	94832	.
chr-13	46890164	46892425	16346	68377	.
chr-13	46901312	46903948	16348	90416	.
chr-13	47220731	47223798	16361	86624	.
chr-13	47284581	47288653	16366	106512	.
chr-13	47295706	47298848	16368	86612	.
chr-13	47307117	47309051	16369	67783	.
chr-13	47346044	47350759	16376	166368	.
chr-13	47384353	47386865	16381	74887	.
chr-13	47497498	47501293	16395	110809	.
chr-13	47514379	47519710	16398	182285	.
chr-13	47538097	47540795	16401	89469	.
chr-13	47577248	47583537	16403	247103	.
chr-13	47584866	47588121	16405	88495	.
chr-13	47667491	47670232	16412	116437	.
chr-13	47690963	47693938	16414	122519	.
chr-13	48056789	48060222	16430	116667	.
chr-13	48376324	48379528	16443	151710	.
chr-13	48396154	48403658	16446	162455	.
chr-13	48415160	48418388	16447	78923	.
chr-13	48451803	48453904	16450	75279	.
chr-13	48454868	48462789	16451	158126	.
chr-13	48463879	48471164	16452	172844	.
chr-13	48572214	48574695	16458	140568	.
chr-13	48612365	48615135	16463	107422	.
chr-13	48617197	48620773	16464	138192	.
chr-13	48620935	48625703	16465	115959	.
chr-13	48868241	48870141	16483	85394	.
chr-13	48928506	48931641	16489	104521	.
chr-13	49117767	49123679	16496	153927	.
chr-13	49363224	49365260	16505	87334	.
chr-13	49440904	49442970	16508	124830	.
chr-13	49455970	49457816	16511	83738	.
chr-13	49476214	49478644	16515	96075	.
chr-13	49551760	49555421	16525	131748	.
chr-13	49568673	49570431	16526	89008	.
chr-13	50151692	50153371	16550	74705	.
chr-13	50162290	50166180	16551	213673	.
chr-13	50223292	50225010	16555	79001	.
chr-13	50485987	50489865	16572	262296	.
chr-13	50973193	50978170	16595	174676	.
chr-13	51013848	51015949	16602	181712	.
chr-13	51055533	51058054	16607	125747	.
chr-13	51073498	51077515	16612	163201	.
chr-13	51246467	51250370	16619	138330	.
chr-13	51306021	51309199	16628	139684	.
chr-13	51643159	51645409	16644	74969	.
chr-13	51842781	51846557	16656	124798	.
chr-13	51861982	51864427	16657	109009	.
chr-13	51865133	51867804	16658	88586	.
chr-13	51880829	51883992	16661	93582	.
chr-13	51933112	51934206	16666	73659	.
chr-13	51934401	51936218	16667	74559	.
chr-13	52145024	52147655	16679	201748	.
chr-13	52269284	52273965	16686	229186	.
chr-13	52301708	52303996	16689	166824	.
chr-13	52375286	52377267	16692	80733	.
chr-13	52532699	52535303	16707	69164	.
chr-13	52969854	52973964	16733	122122	.
chr-13	53027238	53029284	16740	73290	.
chr-13	53104830	53106322	16751	78670	.
chr-13	53248611	53250227	16763	73180	.
chr-13	53456810	53458580	16779	140459	.
chr-13	53736270	53738711	16797	95883	.
chr-13	54000839	54002680	16822	69292	.
chr-13	54060126	54065836	16829	119847	.
chr-13	54066139	54069095	16830	90935	.
chr-13	54090253	54092216	16835	82586	.
chr-13	55306673	55308062	16880	92928	.
chr-13	55443144	55446309	16884	62889	.
chr-13	55591306	55595768	16895	113081	.
chr-14	6745	8013	16900	102431	.
chr-14	31254	35087	16902	121590	.
chr-14	778391	782447	16927	85725	.
chr-14	988823	992571	16943	78682	.
chr-14	1260265	1263592	16956	69514	.
chr-14	1437063	1440336	16972	100029	.
chr-14	1625069	1629027	16986	144548	.
chr-14	1815894	1819117	16992	89124	.
chr-14	2012219	2014889	17002	96239	.
chr-14	2021984	2023193	17004	56522	.
chr-14	2170773	2173324	17014	163173	.
chr-14	2264713	2267368	17023	95817	.
chr-14	2268755	2274903	17024	227734	.
chr-14	2731560	2733809	17054	222946	.
chr-14	2734498	2736287	17055	68586	.
chr-14	2743984	2745616	17057	70725	.
chr-14	2825677	2827632	17060	81507	.
chr-14	2863564	2866631	17062	75096	.
chr-14	3004026	3007925	17064	98663	.
chr-14	3038465	3044563	17072	201177	.
chr-14	3767749	3770592	17117	132638	.
chr-14	3815808	3818026	17120	99348	.
chr-14	3820376	3822313	17122	71329	.
chr-14	4114945	4116855	17132	102438	.
chr-14	4302661	4304276	17139	172921	.
chr-14	4315458	4316672	17140	120874	.
chr-14	6420263	6421874	17213	94049	.
chr-14	6517023	6520303	17219	120104	.
chr-14	7873000	7875500	17283	75104	.
chr-14	8737853	8740379	17334	72317	.
chr-14	9232152	9234601	17345	75562	.
chr-14	9248918	9250899	17348	71006	.
chr-14	9280042	9283787	17350	115103	.
chr-14	9549137	9552565	17364	335305	.
chr-14	9575787	9577638	17366	90586	.
chr-14	9581753	9583735	17367	89982	.
chr-14	9974557	9976108	17390	72126	.
chr-14	10103148	10104072	17402	70811	.
chr-14	10105334	10106773	17404	79754	.
chr-14	11016956	11020298	17446	142472	.
chr-14	11026419	11030217	17447	122930	.
chr-14	11103950	11107853	17456	130445	.
chr-14	11225534	11228739	17466	107670	.
chr-14	11236730	11239218	17468	146724	.
chr-14	11243197	11247041	17470	159760	.
chr-14	11374883	11376493	17477	79865	.
chr-14	11386013	11388363	17481	79759	.
chr-14	11473220	11474700	17493	68724	.
chr-14	11568106	11571617	17498	140871	.
chr-14	11616471	11620162	17505	65994	.
chr-14	11870730	11871905	17510	115192	.
chr-14	11992354	12003070	17518	301782	.
chr-14	12017310	12019358	17520	89315	.
chr-14	12428987	12431821	17552	90622	.
chr-14	12440085	12443173	17553	77419	.
chr-14	13146592	13147647	17580	162507	.
chr-14	13279153	13281601	17588	162496	.
chr-14	13284713	13286432	17589	74613	.
chr-14	13323577	13325404	17596	84581	.
chr-14	13400143	13405155	17600	132869	.
chr-14	13664310	13668253	17608	166301	.
chr-14	15078212	15083038	17662	104777	.
chr-14	15530891	15534394	17693	114588	.
chr-14	15651654	15653756	17698	87519	.
chr-14	15760780	15763797	17707	88559	.
chr-14	15815552	15819133	17711	91270	.
chr-14	15959960	15964112	17721	128836	.
chr-14	16155309	16158544	17724	132679	.
chr-14	16229147	16232048	17730	85286	.
chr-14	16730281	16735575	17748	184079	.
chr-14	16900548	16904033	17753	95255	.
chr-14	17194540	17196776	17763	94361	.
chr-14	18215471	18219071	17799	74893	.
chr-14	18467838	18470380	17810	92016	.
chr-14	18740272	18745113	17826	128301	.
chr-14	19989169	19993212	17868	175196	.
chr-14	20479349	20482415	17897	92648	.
chr-14	20549425	20550817	17902	83951	.
chr-14	20889160	20892958	17917	154990	.
chr-14	21040503	21042429	17926	98032	.
chr-14	21214058	21216660	17930	225506	.
chr-14	21381650	21384031	17949	62321	.
chr-14	22008265	22009914	17969	203445	.
chr-14	22714287	22718052	17997	106036	.
chr-14	23047573	23049480	18023	130495	.
chr-14	23102841	23106929	18029	140484	.
chr-14	23120481	23122115	18032	110857	.
chr-14	23639832	23642272	18053	77201	.
chr-14	23643104	23644816	18054	69519	.
chr-14	23661894	23665441	18056	101528	.
chr-14	23687472	23690164	18060	158732	.
chr-14	23726376	23728106	18068	73534	.
chr-14	23774594	23776879	18071	110105	.
chr-14	23953297	23955215	18075	67215	.
chr-14	24161810	24164233	18094	174184	.
chr-14	24172572	24174021	18095	135095	.
chr-14	24527735	24532364	18109	226692	.
chr-14	24848911	24852458	18126	190305	.
chr-14	25996323	25999050	18192	118617	.
chr-14	26780840	26786308	18231	215067	.
chr-14	26804641	26806401	18232	76392	.
chr-14	26817214	26819117	18233	72758	.
chr-14	26979987	26983736	18244	111059	.
chr-14	27029624	27031879	18252	69240	.
chr-14	27270242	27272699	18265	90867	.
chr-14	27276923	27280724	18266	129917	.
chr-14	27283453	27286957	18267	205657	.
chr-14	27963100	27964809	18286	72806	.
chr-14	28438182	28440494	18303	77026	.
chr-14	28778403	28782793	18313	68803	.
chr-14	28787897	28791156	18314	66539	.
chr-14	28839126	28842816	18320	119521	.
chr-14	29310511	29312353	18360	75399	.
chr-14	29401638	29405301	18366	107565	.
chr-14	29426568	29428541	18371	127985	.
chr-14	30102677	30105216	18414	116323	.
chr-14	30518276	30521856	18434	80160	.
chr-14	30591808	30595763	18446	141877	.
chr-14	30746093	30749835	18456	230392	.
chr-14	30777007	30780275	18462	91295	.
chr-14	30789635	30793348	18463	300069	.
chr-14	30807284	30810057	18467	147025	.
chr-14	31445974	31448715	18488	88777	.
chr-14	31558725	31563415	18492	131292	.
chr-14	31618932	31620895	18497	95462	.
chr-14	33381905	33383896	18569	86442	.
chr-14	33517336	33519458	18583	136924	.
chr-14	33737560	33739860	18601	71455	.
chr-14	33777866	33782357	18607	186980	.
chr-14	33861989	33864908	18614	113300	.
chr-14	33869931	33872238	18616	63154	.
chr-14	34919606	34921043	18685	107071	.
chr-14	36086408	36088205	18729	99570	.
chr-14	36477188	36479851	18751	79127	.
chr-14	36892281	36894363	18776	186743	.
chr-14	37059425	37063044	18781	87298	.
chr-14	37348243	37349848	18788	80317	.
chr-14	37559028	37561337	18806	123234	.
chr-14	37569738	37572121	18807	88755	.
chr-14	38156465	38160326	18829	87096	.
chr-14	38228592	38230476	18831	73298	.
chr-14	38267313	38270656	18835	170364	.
chr-14	38594904	38597250	18856	81635	.
chr-14	39064677	39066732	18893	82178	.
chr-14	39226359	39230085	18905	204918	.
chr-14	39270810	39272296	18909	66413	.
chr-14	39827867	39831018	18928	94149	.
chr-14	39944090	39947849	18933	110880	.
chr-14	40616789	40618592	18962	92803	.
chr-14	40702037	40705453	18974	103056	.
chr-14	40988717	40991989	18988	115631	.
chr-14	41320028	41324265	19006	144807	.
chr-14	41593862	41597451	19016	91205	.
chr-14	42299001	42301147	19051	74971	.
chr-14	42433774	42435877	19061	120249	.
chr-14	42567996	42570043	19074	84183	.
chr-14	42838714	42841656	19087	101765	.
chr-14	42986124	42989757	19095	79601	.
chr-14	43441290	43443820	19107	72322	.
chr-14	43468399	43469945	19111	76287	.
chr-15	993037	995172	19189	121550	.
chr-15	1003631	1007299	19191	123385	.
chr-15	1185086	1187007	19199	81457	.
chr-15	1865904	1870254	19218	124936	.
chr-15	2109413	2111450	19225	79079	.
chr-15	2569560	2571942	19245	150537	.
chr-15	2765273	2766875	19265	102914	.
chr-15	2770807	2773134	19267	87904	.
chr-15	3444288	3446282	19307	98256	.
chr-15	3467576	3473046	19309	205659	.
chr-15	3488953	3491425	19313	135104	.
chr-15	3537809	3541157	19323	105345	.
chr-15	3662812	3666556	19336	113874	.
chr-15	3710286	3711566	19343	88655	.
chr-15	3736064	3739749	19348	108822	.
chr-15	3859710	3862397	19351	135899	.
chr-15	3882878	3885859	19353	125641	.
chr-15	4863091	4866605	19390	95472	.
chr-15	5405613	5407395	19435	66387	.
chr-15	5417705	5419828	19436	130568	.
chr-15	5427995	5430273	19439	74674	.
chr-15	5523062	5526342	19446	92830	.
chr-15	5527818	5529159	19447	66442	.
chr-15	5615711	5619637	19455	156668	.
chr-15	5630141	5631624	19456	92850	.
chr-15	6071445	6074228	19471	74382	.
chr-15	6104688	6109457	19473	157490	.
chr-15	6159881	6162233	19479	126086	.
chr-15	6442538	6445900	19495	91703	.
chr-15	6477468	6479631	19497	84810	.
chr-15	6495897	6499310	19498	94794	.
chr-15	6652018	6656163	19508	236219	.
chr-15	6935148	6938989	19519	74365	.
chr-15	7082172	7084966	19527	73759	.
chr-15	7488257	7490571	19538	94839	.
chr-15	7840775	7844025	19550	70609	.
chr-15	8045698	8047250	19558	107831	.
chr-15	8074615	8078700	19562	124998	.
chr-15	8273022	8276767	19570	148860	.
chr-15	8699176	8702352	19580	99990	.
chr-15	8965705	8968289	19598	107961	.
chr-15	9115355	9117531	19608	142347	.
chr-15	9253676	9256840	19612	130781	.
chr-15	9259813	9262834	19613	117363	.
chr-15	9518976	9520912	19622	66519	.
chr-15	9524804	9526733	19623	93324	.
chr-15	9664067	9665906	19636	104127	.
chr-15	9793429	9797158	19652	130895	.
chr-15	10216156	10217246	19665	92255	.
chr-15	10474406	10477125	19678	120144	.
chr-15	10485335	10487109	19679	73061	.
chr-15	10709484	10713250	19693	175242	.
chr-15	11378413	11381400	19747	124992	.
chr-15	12254652	12256930	19780	89427	.
chr-15	12780190	12783383	19815	75559	.
chr-15	12906129	12909681	19824	105266	.
chr-15	12934567	12937372	19829	130620	.
chr-15	12954554	12957168	19830	117275	.
chr-15	12990697	12993229	19833	106046	.
chr-15	13351238	13354363	19855	210279	.
chr-15	13825996	13828155	19882	85070	.
chr-15	14387777	14389675	19904	117216	.
chr-15	14437150	14440637	19911	169517	.
chr-15	14571571	14573781	19914	83160	.
chr-15	14705397	14708341	19929	144774	.
chr-15	14712299	14715514	19931	182141	.
chr-15	14780791	14782059	19937	99712	.
chr-15	14796187	14799716	19939	151717	.
chr-15	15480535	15483249	19954	93113	.
chr-15	16102591	16104696	19959	66085	.
chr-15	16528245	16532039	19981	174724	.
chr-15	16618580	16620567	19991	84089	.
chr-15	16657020	16659414	19995	120321	.
chr-15	16727564	16730930	19999	126435	.
chr-15	16823569	16826186	20010	88051	.
chr-15	16928233	16931818	20016	93810	.
chr-15	17572569	17574965	20052	80597	.
chr-15	17603458	17607159	20055	157654	.
chr-15	17701209	17703313	20061	65251	.
chr-15	17924050	17927045	20065	76138	.
chr-15	18411607	18415721	20087	111558	.
chr-15	18577661	18579379	20100	110042	.
chr-15	18705591	18710117	20108	155769	.
chr-15	18869502	18871586	20111	75340	.
chr-15	19042709	19046140	20127	173814	.
chr-15	19152440	19156116	20137	129809	.
chr-15	19277561	19281193	20148	104039	.
chr-15	19857329	19859321	20165	92831	.
chr-15	19902459	19906516	20167	117652	.
chr-15	20180482	20183887	20182	128350	.
chr-15	20292688	20294557	20187	112457	.
chr-15	20300742	20302374	20190	78422	.
chr-15	20510221	20513116	20197	74955	.
chr-15	20714239	20716076	20203	85749	.
chr-15	20807404	20811893	20206	166617	.
chr-15	20839527	20842417	20208	95113	.
chr-15	20941776	20944194	20215	88407	.
chr-15	21825590	21829678	20256	164439	.
chr-15	21855363	21858001	20260	83591	.
chr-15	22212216	22213836	20278	94940	.
chr-15	22397805	22399490	20288	82287	.
chr-15	25176391	25179099	20387	71902	.
chr-15	25187423	25190552	20389	194263	.
chr-15	25913045	25917236	20432	184240	.
chr-15	25968935	25971814	20439	110569	.
chr-15	26327316	26329946	20458	68506	.
chr-15	26664865	26668705	20470	103203	.
chr-15	26758676	26762435	20483	116627	.
chr-15	26886509	26889713	20487	147834	.
chr-15	26912166	26914406	20489	70352	.
chr-15	27206665	27208200	20495	72607	.
chr-15	27574807	27576818	20513	83021	.
chr-15	28871575	28873528	20552	104528	.
chr-15	28890434	28892581	20555	70051	.
chr-15	30927483	30929386	20603	93902	.
chr-15	32201618	32204360	20655	74503	.
chr-15	32971618	32973513	20695	86204	.
chr-15	34803054	34805879	20752	103920	.
chr-15	34949232	34952371	20768	117199	.
chr-15	35220923	35224099	20781	150127	.
chr-15	35244201	35248372	20784	121291	.
chr-15	35259174	35261827	20786	91979	.
chr-15	35310150	35312155	20792	79543	.
chr-15	35595260	35598390	20812	71629	.
chr-15	36752682	36756085	20860	95967	.
chr-15	36800444	36802560	20866	92719	.
chr-15	37404607	37406670	20901	75762	.
chr-15	37583310	37586527	20906	87071	.
chr-15	37610935	37614266	20911	91915	.
chr-15	37640590	37642961	20913	77236	.
chr-15	37759633	37763652	20924	134910	.
chr-15	37853944	37856536	20936	111429	.
chr-15	37948508	37953763	20942	182286	.
chr-15	38098193	38100518	20957	111608	.
chr-15	38331272	38334439	20978	87513	.
chr-15	38576726	38582413	20991	202240	.
chr-15	38644706	38647353	20996	70964	.
chr-15	39195633	39197844	21025	171409	.
chr-15	39200463	39202063	21026	94407	.
chr-15	39250910	39253397	21029	123032	.
chr-15	39512080	39515055	21038	77533	.
chr-15	39818210	39820138	21059	77450	.
chr-15	39849234	39852296	21061	83007	.
chr-15	39922169	39927283	21068	97000	.
chr-15	40398472	40402083	21082	97955	.
chr-15	40657059	40659218	21092	70114	.
chr-15	40934272	40937434	21103	185555	.
chr-15	41091281	41094595	21115	98518	.
chr-15	41470350	41472873	21143	68494	.
chr-15	41531887	41534309	21147	79855	.
chr-15	41562664	41566426	21149	75149	.
chr-15	41880183	41882921	21159	75067	.
chr-15	42103680	42106810	21171	122496	.
chr-15	42109398	42112843	21172	125421	.
chr-15	42214086	42216742	21178	116685	.
chr-15	42219890	42221929	21179	67440	.
chr-15	42256893	42259333	21185	91486	.
chr-15	42456702	42459005	21193	110861	.
chr-15	42564578	42569318	21202	151689	.
chr-15	42587072	42589614	21205	143118	.
chr-15	42803406	42804099	21215	159292	.
chr-15	42890918	42896493	21217	252157	.
chr-15	42932668	42934679	21222	93452	.
chr-15	42963091	42965442	21227	73579	.
chr-15	42985325	42988431	21232	74839	.
chr-15	42989600	42993419	21233	212702	.
chr-15	43042898	43044364	21236	122143	.
chr-15	43083380	43087182	21242	78083	.
chr-15	43095099	43098028	21243	229948	.
chr-15	43648314	43650043	21273	64952	.
chr-15	43691014	43693536	21283	130062	.
chr-15	43771022	43775343	21291	103439	.
chr-15	43898766	43902267	21297	94215	.
chr-15	44120593	44124377	21309	92559	.
chr-15	44274218	44276638	21318	71140	.
chr-15	44748332	44749714	21344	74036	.
chr-15	44798765	44800416	21354	67192	.
chr-15	44807411	44809325	21357	89289	.
chr-15	44830895	44834327	21363	126995	.
chr-15	44900207	44901698	21369	97426	.
chr-15	45121097	45124396	21395	95776	.
chr-15	45334197	45336783	21406	84568	.
chr-15	45362422	45366114	21407	97909	.
chr-15	45439783	45441374	21414	74999	.
chr-15	45687685	45690204	21424	75043	.
chr-15	45712786	45714695	21428	74432	.
chr-15	45731872	45734248	21430	96719	.
chr-15	45767829	45769937	21432	87359	.
chr-15	46013041	46015554	21447	92222	.
chr-15	46136854	46140469	21460	151080	.
chr-15	46253394	46256134	21473	348857	.
chr-15	46326938	46329062	21479	70533	.
chr-15	46387150	46388804	21486	111067	.
chr-15	47058142	47061491	21519	91137	.
chr-15	47354585	47356453	21539	103316	.
chr-15	47474887	47476746	21547	72143	.
chr-15	47568892	47570948	21550	67081	.
chr-15	47587194	47593844	21552	124147	.
chr-15	47600844	47603369	21553	70745	.
chr-15	47789471	47792605	21572	86296	.
chr-15	47946212	47949066	21581	123400	.
chr-15	47978986	47980889	21588	98615	.
chr-15	48483342	48486182	21626	98085	.
chr-15	48647415	48649879	21630	74921	.
chr-15	48680364	48683378	21634	85655	.
chr-15	48717333	48721953	21637	170901	.
chr-15	50095121	50097746	21704	102928	.
chr-15	50097920	50102029	21705	126244	.
chr-15	50328755	50330689	21713	81799	.
chr-15	50345365	50349152	21716	182490	.
chr-15	50451383	50455034	21721	125202	.
chr-15	50761036	50764640	21730	102057	.
chr-15	50826976	50830957	21735	98873	.
chr-15	50937953	50940664	21739	153627	.
chr-15	51036346	51037690	21742	93890	.
chr-15	51178664	51183415	21752	92439	.
chr-15	51627046	51630500	21770	82262	.
chr-15	52145454	52149069	21799	109333	.
chr-15	52150074	52151967	21800	81235	.
chr-15	52412645	52415901	21819	124833	.
chr-15	52420494	52423943	21820	95248	.
chr-15	52435192	52436962	21824	77437	.
chr-15	52615159	52617234	21839	119847	.
chr-15	52684530	52686585	21849	88414	.
chr-15	52981406	52985757	21864	185505	.
chr-15	53008812	53012600	21867	115821	.
chr-15	53023409	53025682	21868	69207	.
chr-15	53123480	53127176	21873	130893	.
chr-15	53553153	53556204	21886	113356	.
chr-15	55148436	55152835	21971	97575	.
chr-15	55158315	55160930	21972	113617	.
chr-15	55474525	55476521	21998	87800	.
chr-15	55827810	55829923	22005	167811	.
chr-2	432918	435889	22028	87399	.
chr-2	490711	493315	22037	112805	.
chr-2	606000	608685	22045	129341	.
chr-2	622300	623837	22048	87609	.
chr-2	624512	625620	22049	172476	.
chr-2	635549	638686	22050	249421	.
chr-2	757265	759878	22060	143246	.
chr-2	793602	795141	22065	92581	.
chr-2	800959	803668	22067	77458	.
chr-2	804683	806093	22068	114413	.
chr-2	972158	982146	22086	237255	.
chr-2	995880	998981	22088	127749	.
chr-2	1498750	1502374	22114	93579	.
chr-2	1661053	1663290	22122	99043	.
chr-2	1778686	1781337	22129	77794	.
chr-2	2108875	2109752	22145	87599	.
chr-2	2144286	2146596	22150	80008	.
chr-2	2263046	2266468	22163	167307	.
chr-2	2291815	2295299	22166	180569	.
chr-2	2315750	2318647	22169	130702	.
chr-2	2519855	2523560	22188	249031	.
chr-2	2541483	2545503	22189	169385	.
chr-2	2561730	2563716	22190	79014	.
chr-2	2687707	2690605	22196	321596	.
chr-2	2719097	2720703	22203	70149	.
chr-2	3332873	3339590	22230	394369	.
chr-2	3380534	3383020	22233	131702	.
chr-2	3393073	3395938	22235	132321	.
chr-2	3437915	3441670	22239	142797	.
chr-2	3599875	3603586	22248	155043	.
chr-2	3605755	3609233	22249	132329	.
chr-2	3612249	3614507	22250	79657	.
chr-2	3615892	3617889	22251	143720	.
chr-2	3639410	3642480	22256	126046	.
chr-2	3805049	3807640	22261	73383	.
chr-2	3817987	3819434	22265	72027	.
chr-2	3842819	3845670	22270	93614	.
chr-2	4059520	4061005	22275	76174	.
chr-2	4566945	4571584	22299	121767	.
chr-2	6111798	6116498	22374	73973	.
chr-2	7055478	7056529	22412	92431	.
chr-2	7416190	7418619	22437	133992	.
chr-2	7669849	7671863	22449	83130	.
chr-2	8435618	8437188	22480	72996	.
chr-2	9033945	9037216	22512	74377	.
chr-2	9344400	9348207	22518	71417	.
chr-2	9447242	9449152	22528	77987	.
chr-2	9572885	9575155	22542	87886	.
chr-2	9699324	9703973	22551	179437	.
chr-2	9807638	9809271	22558	80525	.
chr-2	9922912	9925640	22565	94137	.
chr-2	9970509	9975624	22568	98901	.
chr-2	10019423	10021453	22573	67434	.
chr-2	10180210	10184085	22583	90618	.
chr-2	11102118	11104583	22609	71916	.
chr-2	11153008	11156625	22611	118236	.
chr-2	11160548	11163510	22613	90907	.
chr-2	11360199	11362775	22626	104335	.
chr-2	11383278	11385175	22628	94673	.
chr-2	11394739	11397567	22629	89794	.
chr-2	11407168	11410670	22631	126919	.
chr-2	11556498	11559138	22640	125969	.
chr-2	11564090	11567561	22642	102293	.
chr-2	11595979	11599191	22645	75046	.
chr-2	11762642	11764849	22654	84136	.
chr-2	11775810	11777732	22655	83382	.
chr-2	11929929	11932963	22663	102789	.
chr-2	11965113	11968136	22670	106565	.
chr-2	12000739	12005387	22675	120461	.
chr-2	12007834	12010805	22677	69325	.
chr-2	12116950	12118740	22681	78024	.
chr-2	12853640	12856315	22709	79503	.
chr-2	12859552	12862086	22711	98396	.
chr-2	12904923	12907524	22716	134161	.
chr-2	13330374	13335778	22747	270715	.
chr-2	13353631	13355669	22748	81731	.
chr-2	13387499	13389585	22749	83217	.
chr-2	13423354	13426146	22754	96402	.
chr-2	13535461	13537527	22758	149515	.
chr-2	13539032	13545281	22760	394616	.
chr-2	13586466	13589822	22766	203703	.
chr-2	13611263	13615049	22767	200179	.
chr-2	13637902	13639909	22771	190676	.
chr-2	13641013	13642928	22772	78157	.
chr-2	13647154	13649359	22774	112901	.
chr-2	13810951	13812996	22780	251160	.
chr-2	13821081	13824152	22782	175707	.
chr-2	13826275	13828063	22783	105097	.
chr-2	13848024	13851656	22788	171329	.
chr-2	13853053	13854708	22789	111363	.
chr-2	14061729	14063523	22803	75014	.
chr-2	14153222	14155442	22808	182931	.
chr-2	14372802	14377072	22823	435904	.
chr-2	14481534	14482852	22837	87674	.
chr-2	15160215	15165542	22884	298641	.
chr-2	15264367	15267326	22891	65991	.
chr-2	15397487	15399628	22898	153159	.
chr-2	15596836	15600655	22908	238225	.
chr-2	16898744	16900475	22959	88780	.
chr-2	17011563	17013535	22960	81750	.
chr-2	17042446	17045370	22963	93210	.
chr-2	17273787	17276634	22970	115455	.
chr-2	17322570	17324831	22972	98138	.
chr-2	17325082	17327058	22973	118002	.
chr-2	17341407	17343347	22976	85640	.
chr-2	17406880	17412465	22979	177676	.
chr-2	17424089	17427633	22982	178435	.
chr-2	17595040	17600549	22999	142688	.
chr-2	17720363	17722343	23006	72179	.
chr-2	18399315	18401293	23039	102096	.
chr-2	18976999	18979071	23045	87113	.
chr-2	19089527	19094272	23052	173882	.
chr-2	19119799	19123271	23055	130878	.
chr-2	19123544	19127168	23056	104940	.
chr-2	19283889	19287470	23069	96926	.
chr-2	19452800	19455458	23080	80347	.
chr-2	19724277	19727401	23099	93366	.
chr-2	21016831	21018894	23115	84350	.
chr-2	21214646	21216849	23125	100574	.
chr-2	21905574	21907408	23150	109837	.
chr-2	22061686	22064099	23166	95566	.
chr-2	22256236	22259883	23177	105903	.
chr-2	22432475	22433582	23191	95570	.
chr-2	22474203	22476810	23196	78677	.
chr-2	22480909	22484322	23197	151602	.
chr-2	22809758	22811823	23211	120371	.
chr-2	22820547	22822277	23214	83029	.
chr-2	22832462	22834497	23216	82060	.
chr-2	22870518	22873530	23221	125234	.
chr-2	23121068	23124163	23229	70050	.
chr-2	23203280	23206976	23232	77787	.
chr-2	23211607	23213416	23233	77618	.
chr-2	23223285	23231301	23235	366742	.
chr-2	23337050	23340790	23247	168446	.
chr-2	23342565	23346059	23248	120603	.
chr-2	23639372	23642694	23263	100847	.
chr-2	23739763	23742503	23266	116004	.
chr-2	23746881	23751284	23267	313523	.
chr-2	23893806	23896428	23284	74057	.
chr-2	24492652	24494695	23313	82247	.
chr-2	24548195	24550401	23318	82024	.
chr-2	24574213	24577399	23319	86029	.
chr-2	24654499	24656416	23332	75364	.
chr-2	25227282	25231022	23368	111706	.
chr-2	25244113	25246194	23369	77883	.
chr-2	25345913	25349217	23379	77990	.
chr-2	26015772	26018453	23415	100731	.
chr-2	26190666	26192471	23431	78296	.
chr-2	26547355	26548570	23454	68058	.
chr-2	26696775	26700445	23465	101100	.
chr-2	27784843	27787221	23510	73883	.
chr-2	27997836	27999671	23515	84193	.
chr-2	28103961	28106754	23521	107487	.
chr-2	28262727	28264554	23532	81443	.
chr-2	28659335	28660509	23538	99948	.
chr-2	29123080	29125713	23554	72986	.
chr-2	29212921	29217189	23564	123695	.
chr-2	29994379	29996805	23595	96471	.
chr-2	30010608	30014221	23598	100653	.
chr-2	30668427	30669455	23620	84245	.
chr-2	30777104	30779258	23624	75607	.
chr-2	30890483	30892632	23628	66649	.
chr-2	31025571	31029472	23635	292145	.
chr-2	31039673	31043945	23638	168059	.
chr-2	31057871	31061780	23641	155067	.
chr-2	31463851	31467441	23657	97081	.
chr-2	32294341	32297986	23686	145603	.
chr-2	32856701	32858130	23708	66274	.
chr-2	33186821	33189261	23720	76991	.
chr-2	33731502	33734924	23745	102908	.
chr-2	33738176	33739651	23746	87103	.
chr-2	34905126	34907737	23790	138231	.
chr-2	34911108	34913047	23791	156604	.
chr-2	35588332	35590919	23811	89388	.
chr-2	36282440	36286432	23832	143060	.
chr-2	36435513	36437108	23843	107891	.
chr-2	38282948	38286345	23892	114472	.
chr-2	38372631	38375189	23899	132784	.
chr-2	38435428	38437409	23903	64405	.
chr-2	38750131	38754502	23923	160080	.
chr-2	38940405	38943434	23936	104219	.
chr-2	38984024	38985630	23943	93160	.
chr-2	38987467	38991875	23945	260880	.
chr-2	39369352	39374304	23958	105083	.
chr-2	39521342	39524196	23967	94827	.
chr-2	39909384	39913078	23986	262750	.
chr-2	39929831	39934740	23992	243320	.
chr-2	40087432	40088258	23998	349595	.
chr-2	40233836	40238488	24004	298863	.
chr-2	40528931	40530705	24014	82436	.
chr-2	40731880	40734043	24028	78288	.
chr-2	40860400	40862258	24036	74544	.
chr-2	40902871	40908633	24040	142068	.
chr-2	41182245	41185429	24054	83712	.
chr-2	41701798	41705773	24071	183904	.
chr-2	41750257	41752757	24072	68677	.
chr-2	42310950	42313906	24094	92242	.
chr-2	42380167	42383403	24098	82365	.
chr-2	43206365	43209042	24131	128594	.
chr-2	43507922	43510711	24145	94304	.
chr-2	44927512	44931266	24191	99687	.
chr-2	44986423	44989971	24197	103754	.
[truncated: 1,745 more rows]

## Sheet: ATAC-seq Peaks
Chromosome	Start	Stop	Peak ID	Peak Score	Strand	Position Relative to Gene	Distance to TSS	Nearest Gene
chr-7	8957935	8959368	Peak_1	171199	.	Upstream	8149	HVAEP1_G012699
chr-13	51579236	51580116	Peak_2	144085	.	Downstream	5665	HVAEP1_G025667
chr-7	18943110	18944109	Peak_3	140610	.	Upstream	15154	HVAEP1_G013030
chr-8	4604450	4605030	Peak_4	127641	.	NA	NA	NA
chr-14	336979	337715	Peak_5	111883	.	Upstream	9921	HVAEP1_G025830
chr-7	8960006	8960541	Peak_6	111841	.	Upstream	6527	HVAEP1_G012699
chr-1	9973025	9973470	Peak_7	110424	.	Downstream	40349	HVAEP1_G000274
chr-8	4602804	4603239	Peak_8	106860	.	NA	NA	NA
chr-1	22706931	22707869	Peak_9	86287	.	Upstream	3972	HVAEP1_G000624
chr-1	9974281	9974811	Peak_10	84282	.	Downstream	41648	HVAEP1_G000274
chr-1	35220692	35221407	Peak_11	81144	.	Downstream	40489	HVAEP1_G001097
chr-1	24061944	24062414	Peak_12	72462	.	Downstream	17591	HVAEP1_G000667
chr-1	35346824	35347442	Peak_13	71649	.	Upstream	58181	HVAEP1_G001099
chr-1	11356874	11357402	Peak_14	70826	.	Upstream	10185	HVAEP1_G000303
chr-8	4601775	4602207	Peak_15	48614	.	NA	NA	NA
chr-9	51530173	51530876	Peak_16	48526	.	Upstream	5885	HVAEP1_G017305
chr-1	35250749	35251203	Peak_17	48064	.	Downstream	70416	HVAEP1_G001097
chr-1	35305719	35306273	Peak_18	36141	.	Upstream	99318	HVAEP1_G001099
chr-7	8956830	8957377	Peak_19	35827	.	Upstream	9697	HVAEP1_G012699
chr-4	45449981	45450435	Peak_20	35300	.	Downstream	3281	HVAEP1_G008823
chr-1	9975340	9975962	Peak_21	33789	.	Downstream	42753	HVAEP1_G000274
chr-13	51578638	51579045	Peak_22	33227	.	Downstream	4830	HVAEP1_G025667
chr-13	51575963	51576292	Peak_23	31887	.	Downstream	2116	HVAEP1_G025667
chr-10	8141	9457	Peak_24	30772	.	NA	NA	NA
chr-1	381033	381882	Peak_25	30442	.	Upstream	57126	HVAEP1_G000011
chr-8	31732748	31733013	Peak_26	28825	.	Downstream	24514	HVAEP1_G014698
chr-10	27356311	27356890	Peak_27	28189	.	Upstream	28947	HVAEP1_G018488
chr-1	60506062	60506732	Peak_28	28010	.	OverlapStart	110	HVAEP1_G001955
chr-9	27930434	27933519	Peak_29	24659	.	Upstream	17513	HVAEP1_G016480
chr-7	15166917	15169403	Peak_30	23768	.	Downstream	4520	HVAEP1_G012915
chr-11	20882555	20883664	Peak_31	23347	.	Upstream	1043	HVAEP1_G020052
chr-1	47859152	47864356	Peak_32	22674	.	Downstream	39424	HVAEP1_G001475
chr-1	47844794	47845945	Peak_33	22569	.	Downstream	55809	HVAEP1_G001475
chr-11	29496163	29499788	Peak_34	22353	.	Upstream	28697	HVAEP1_G020338
chr-1	35906257	35907166	Peak_35	20151	.	Upstream	5317	HVAEP1_G001110
chr-8	59552262	59554038	Peak_36	19868	.	Downstream	87313	HVAEP1_G015525
chr-1	48790464	48791138	Peak_37	19210	.	Upstream	383	HVAEP1_G001503
chr-2	42713075	42714405	Peak_38	18720	.	Upstream	21325	HVAEP1_G004032
chr-13	51577034	51577330	Peak_39	18612	.	Downstream	3171	HVAEP1_G025667
chr-10	1702	2392	Peak_40	18486	.	NA	NA	NA
chr-11	7330588	7330887	Peak_41	17316	.	Downstream	6429	HVAEP1_G019610
chr-14	340479	340927	Peak_42	16786	.	Upstream	13277	HVAEP1_G025830
chr-3	29173251	29176608	Peak_43	16783	.	Downstream	48291	HVAEP1_G006080
chr-15	15409655	15410120	Peak_44	16605	.	Upstream	1330	HVAEP1_G027626
chr-13	51580993	51581279	Peak_45	16245	.	Upstream	5965	HVAEP1_G025668
chr-9	63780823	63781475	Peak_46	15900	.	Downstream	41392	HVAEP1_G017676
chr-13	39405261	39405797	Peak_47	15855	.	OverlapStart	140	HVAEP1_G025294
chr-2	4703986	4704514	Peak_48	15815	.	Upstream	19576	HVAEP1_G002768
chr-10	27374676	27375129	Peak_49	15569	.	Upstream	10645	HVAEP1_G018488
chr-2	59291470	59292253	Peak_50	15560	.	Downstream	12600	HVAEP1_G004609
chr-1	35211831	35212601	Peak_51	14706	.	Downstream	31656	HVAEP1_G001097
chr-1	35337467	35338842	Peak_52	14451	.	Upstream	67160	HVAEP1_G001099
chr-1	29102767	29103384	Peak_53	14272	.	Upstream	16714	HVAEP1_G000848
chr-6	43916894	43917499	Peak_54	14231	.	Downstream	22398	HVAEP1_G011786
chr-9	63342830	63343352	Peak_55	13822	.	PeakInsideFeature	7984	HVAEP1_G017660
chr-11	29491534	29494724	Peak_56	13758	.	Upstream	33543	HVAEP1_G020338
chr-1	35239734	35240836	Peak_57	13436	.	Downstream	59725	HVAEP1_G001097
chr-11	14062639	14063228	Peak_58	13431	.	OverlapStart	39	HVAEP1_G019837
chr-8	3884260	3884944	Peak_59	13181	.	Downstream	8096	HVAEP1_G013813
chr-2	3854224	3854859	Peak_60	13099	.	OverlapStart	38	HVAEP1_G002754
chr-8	57345819	57346299	Peak_61	12851	.	Downstream	36696	HVAEP1_G015461
chr-1	35225577	35226331	Peak_62	12838	.	Downstream	45394	HVAEP1_G001097
chr-6	34042743	34046606	Peak_63	12783	.	Upstream	40090	HVAEP1_G011519
chr-6	59825329	59826019	Peak_64	12681	.	OverlapStart	224	HVAEP1_G012275
chr-15	4935291	4935972	Peak_65	12608	.	OverlapStart	8	HVAEP1_G027297
chr-4	29080178	29082605	Peak_66	12516	.	Downstream	56848	HVAEP1_G008287
chr-6	2534585	2534914	Peak_67	12339	.	Downstream	15925	HVAEP1_G010489
chr-4	47778807	47779498	Peak_68	12234	.	OverlapStart	207	HVAEP1_G008898
chr-1	72118924	72119896	Peak_69	12140	.	OverlapStart	253	HVAEP1_G002328
chr-2	23663817	23664369	Peak_70	12137	.	OverlapStart	65	HVAEP1_G003396
chr-12	44875380	44877930	Peak_71	12136	.	Upstream	33419	HVAEP1_G022726
chr-12	13748596	13749443	Peak_72	12033	.	OverlapStart	133	HVAEP1_G021724
chr-13	42704109	42705051	Peak_73	12012	.	OverlapStart	114	HVAEP1_G025384
chr-1	79540365	79540911	Peak_74	11897	.	Upstream	877	HVAEP1_G002607
chr-8	52344117	52344871	Peak_75	11807	.	Upstream	22605	HVAEP1_G015361
chr-11	50668177	50668746	Peak_76	11736	.	Upstream	30144	HVAEP1_G021059
chr-8	33300793	33301466	Peak_77	11589	.	OverlapStart	99	HVAEP1_G014748
chr-1	35308271	35309436	Peak_78	11577	.	Upstream	96461	HVAEP1_G001099
chr-6	1119647	1120338	Peak_79	11511	.	Upstream	515	HVAEP1_G010427
chr-10	22320256	22320966	Peak_80	11369	.	Downstream	4653	HVAEP1_G018335
chr-6	13518367	13519095	Peak_81	11339	.	OverlapStart	228	HVAEP1_G010842
chr-6	55544428	55545413	Peak_82	11310	.	Upstream	635	HVAEP1_G012148
chr-2	16010913	16011370	Peak_83	11294	.	OverlapStart	39	HVAEP1_G003128
chr-9	12027186	12027974	Peak_84	11078	.	OverlapStart	154	HVAEP1_G015984
chr-13	32379545	32380058	Peak_85	11007	.	OverlapStart	48	HVAEP1_G025068
chr-11	35270939	35271447	Peak_86	10998	.	OverlapStart	86	HVAEP1_G020545
chr-9	23689430	23690025	Peak_87	10991	.	OverlapStart	10	HVAEP1_G016348
chr-1	55920692	55921372	Peak_88	10942	.	NA	NA	NA
chr-5	13974156	13974977	Peak_89	10883	.	OverlapStart	124	HVAEP1_G009553
chr-10	31947435	31948582	Peak_90	10872	.	Upstream	5411	HVAEP1_G018643
chr-3	1514853	1515410	Peak_91	10836	.	Upstream	999	HVAEP1_G005143
chr-6	46621957	46622666	Peak_92	10790	.	OverlapStart	97	HVAEP1_G011868
chr-2	50559745	50560394	Peak_93	10736	.	Downstream	27718	HVAEP1_G004301
chr-3	29152633	29154072	Peak_94	10731	.	Downstream	26714	HVAEP1_G006080
chr-13	22349802	22350503	Peak_95	10707	.	Downstream	7785	HVAEP1_G024739
chr-10	50209274	50209891	Peak_96	10639	.	Upstream	5818	HVAEP1_G019197
chr-1	48483650	48484301	Peak_97	10632	.	OverlapStart	108	HVAEP1_G001490
chr-1	35241804	35242619	Peak_98	10585	.	Downstream	61651	HVAEP1_G001097
chr-14	5198	5413	Peak_99	10556	.	Downstream	64028	HVAEP1_G025826
chr-10	27379548	27380179	Peak_100	10544	.	Upstream	5684	HVAEP1_G018488
chr-9	14609199	14609818	Peak_101	10544	.	Upstream	451	HVAEP1_G016063
chr-14	10959469	10960128	Peak_102	10510	.	OverlapStart	21	HVAEP1_G026145
chr-12	76235458	76235988	Peak_103	10494	.	PeakInsideFeature	418	HVAEP1_G023703
chr-2	13566930	13567567	Peak_104	10465	.	OverlapStart	99	HVAEP1_G003055
chr-11	40115890	40116324	Peak_105	10447	.	Upstream	17130	HVAEP1_G020717
chr-12	5541422	5541999	Peak_106	10366	.	Upstream	966	HVAEP1_G021446
chr-11	52317332	52317887	Peak_107	10277	.	OverlapStart	110	HVAEP1_G021122
chr-6	29546080	29546595	Peak_108	10231	.	OverlapStart	7	HVAEP1_G011397
chr-1	53949304	53949946	Peak_109	10217	.	OverlapStart	39	HVAEP1_G001684
chr-12	53138355	53139039	Peak_110	10197	.	Upstream	1601	HVAEP1_G022976
chr-7	35131794	35132526	Peak_111	10150	.	OverlapStart	24	HVAEP1_G013452
chr-8	28980562	28981664	Peak_112	10105	.	Downstream	13670	HVAEP1_G014612
chr-1	47879210	47880736	Peak_113	9998	.	Downstream	21205	HVAEP1_G001475
chr-12	78034412	78035043	Peak_114	9957	.	Upstream	10407	HVAEP1_G023766
chr-1	35339752	35340152	Peak_115	9914	.	Upstream	65362	HVAEP1_G001099
chr-12	53581474	53582304	Peak_116	9894	.	OverlapStart	62	HVAEP1_G022988
chr-11	41666503	41667083	Peak_117	9857	.	Upstream	6491	HVAEP1_G020778
chr-7	9056757	9057367	Peak_118	9819	.	OverlapStart	27	HVAEP1_G012705
chr-2	18629814	18630339	Peak_119	9814	.	Upstream	10855	HVAEP1_G003213
chr-9	54917902	54918427	Peak_120	9795	.	OverlapStart	14	HVAEP1_G017410
chr-12	25807520	25808255	Peak_121	9752	.	OverlapStart	64	HVAEP1_G022118
chr-9	16046054	16046669	Peak_122	9701	.	Upstream	33607	HVAEP1_G016116
chr-9	30835320	30835874	Peak_123	9695	.	Downstream	6218	HVAEP1_G016562
chr-9	20104723	20105299	Peak_124	9688	.	Downstream	9205	HVAEP1_G016251
chr-15	23808187	23809282	Peak_125	9662	.	NA	NA	NA
chr-11	33795377	33796133	Peak_126	9641	.	PeakInsideFeature	421	HVAEP1_G020500
chr-4	20360690	20361288	Peak_127	9596	.	Upstream	9202	HVAEP1_G008015
chr-13	30915335	30915999	Peak_128	9587	.	PeakInsideFeature	781	HVAEP1_G025006
chr-6	33590890	33591334	Peak_129	9565	.	OverlapStart	82	HVAEP1_G011507
chr-4	41974553	41975813	Peak_130	9558	.	OverlapStart	110	HVAEP1_G008697
chr-2	18535183	18535657	Peak_131	9547	.	Upstream	3758	HVAEP1_G003210
chr-9	57197791	57198419	Peak_132	9545	.	Downstream	12230	HVAEP1_G017469
chr-8	10885842	10886542	Peak_133	9521	.	Upstream	17640	HVAEP1_G014020
chr-7	6251380	6252004	Peak_134	9508	.	OverlapStart	35	HVAEP1_G012598
chr-15	31542125	31542860	Peak_135	9505	.	Upstream	2222	HVAEP1_G028114
chr-9	60396155	60396606	Peak_136	9499	.	PeakInsideFeature	229	HVAEP1_G017588
chr-14	21471181	21471748	Peak_137	9488	.	Upstream	11674	HVAEP1_G026448
chr-14	21452299	21453325	Peak_138	9475	.	OverlapStart	249	HVAEP1_G026444
chr-15	4491777	4492472	Peak_139	9442	.	Upstream	2631	HVAEP1_G027283
chr-9	29741846	29742790	Peak_140	9429	.	OverlapStart	264	HVAEP1_G016530
chr-3	43224268	43224791	Peak_141	9426	.	Upstream	14111	HVAEP1_G006505
chr-11	44507731	44508485	Peak_142	9423	.	OverlapStart	52	HVAEP1_G020871
chr-4	34464770	34465275	Peak_143	9421	.	Upstream	3468	HVAEP1_G008456
chr-9	45609193	45609656	Peak_144	9413	.	Upstream	1593	HVAEP1_G017098
chr-12	80558334	80558785	Peak_145	9393	.	Upstream	6814	HVAEP1_G023840
chr-14	30328724	30329194	Peak_146	9368	.	OverlapStart	94	HVAEP1_G026737
chr-13	4416495	4417159	Peak_147	9333	.	OverlapStart	16	HVAEP1_G024199
chr-12	30744370	30744741	Peak_148	9331	.	OverlapStart	161	HVAEP1_G022288
chr-3	5810846	5811392	Peak_149	9292	.	Upstream	24489	HVAEP1_G005265
chr-9	11660526	11661195	Peak_150	9286	.	Upstream	1764	HVAEP1_G015966
chr-6	54650579	54651254	Peak_151	9275	.	OverlapStart	10	HVAEP1_G012118
chr-11	17023088	17023763	Peak_152	9273	.	OverlapStart	306	HVAEP1_G019928
chr-12	26094803	26095386	Peak_153	9257	.	Downstream	9007	HVAEP1_G022126
chr-13	50297404	50298014	Peak_154	9243	.	Upstream	6510	HVAEP1_G025630
chr-13	24867878	24870426	Peak_155	9242	.	Upstream	5982	HVAEP1_G024825
chr-1	24199178	24199984	Peak_156	9213	.	Downstream	49961	HVAEP1_G000668
chr-6	23316960	23317491	Peak_157	9170	.	OverlapStart	61	HVAEP1_G011207
chr-1	35312343	35312729	Peak_158	9161	.	Upstream	92778	HVAEP1_G001099
chr-13	18103825	18104317	Peak_159	9153	.	Downstream	15687	HVAEP1_G024579
chr-8	13437009	13437704	Peak_160	9147	.	OverlapStart	304	HVAEP1_G014102
chr-13	3963233	3963845	Peak_161	9128	.	Upstream	18052	HVAEP1_G024178
chr-13	4459916	4460602	Peak_162	9105	.	Downstream	14194	HVAEP1_G024200
chr-10	28101711	28102216	Peak_163	9082	.	OverlapStart	1	HVAEP1_G018510
chr-15	55818833	55819393	Peak_164	9069	.	OverlapStart	159	HVAEP1_G028916
chr-3	58677620	58678376	Peak_165	9004	.	OverlapStart	279	HVAEP1_G006973
chr-8	40736023	40736773	Peak_166	8967	.	Upstream	1798	HVAEP1_G014959
chr-2	2480918	2481591	Peak_167	8961	.	Upstream	1912	HVAEP1_G002724
chr-1	38354646	38355243	Peak_168	8941	.	Upstream	620	HVAEP1_G001199
chr-1	29552073	29552788	Peak_169	8901	.	Upstream	7073	HVAEP1_G000868
chr-1	59152744	59153249	Peak_170	8875	.	OverlapStart	43	HVAEP1_G001879
chr-15	1426585	1428028	Peak_171	8866	.	Upstream	2035	HVAEP1_G027192
chr-15	47498768	47499344	Peak_172	8860	.	OverlapStart	6	HVAEP1_G028631
chr-9	7609342	7609949	Peak_173	8826	.	Downstream	7878	HVAEP1_G015821
chr-1	33955363	33955990	Peak_174	8823	.	OverlapStart	1	HVAEP1_G001065
chr-12	80191272	80191884	Peak_175	8784	.	OverlapStart	25	HVAEP1_G023828
chr-6	35333522	35334751	Peak_176	8769	.	OverlapStart	234	HVAEP1_G011551
chr-11	9788475	9789168	Peak_177	8714	.	OverlapStart	182	HVAEP1_G019685
chr-4	27664621	27665153	Peak_178	8701	.	Upstream	325	HVAEP1_G008247
chr-12	71760176	71760764	Peak_179	8695	.	OverlapStart	62	HVAEP1_G023543
chr-9	59536525	59537026	Peak_180	8679	.	Upstream	5587	HVAEP1_G017551
chr-2	13948302	13948881	Peak_181	8678	.	Upstream	15398	HVAEP1_G003064
chr-8	26064115	26064606	Peak_182	8674	.	OverlapStart	142	HVAEP1_G014519
chr-11	10614158	10614720	Peak_183	8672	.	OverlapStart	71	HVAEP1_G019717
chr-2	24453319	24453908	Peak_184	8664	.	PeakInsideFeature	3654	HVAEP1_G003409
chr-6	2526791	2527103	Peak_185	8653	.	Downstream	8123	HVAEP1_G010489
chr-3	69235099	69235699	Peak_186	8649	.	OverlapStart	4	HVAEP1_G007301
chr-5	12296600	12297281	Peak_187	8648	.	OverlapStart	46	HVAEP1_G009511
chr-6	36650926	36651491	Peak_188	8640	.	Upstream	3207	HVAEP1_G011590
chr-11	11422218	11423144	Peak_189	8614	.	OverlapStart	393	HVAEP1_G019737
chr-10	10824960	10825467	Peak_190	8582	.	Upstream	7559	HVAEP1_G017943
chr-8	52837521	52838071	Peak_191	8576	.	OverlapStart	132	HVAEP1_G015369
chr-4	20762380	20763233	Peak_192	8572	.	Upstream	7501	HVAEP1_G008039
chr-14	24313923	24314559	Peak_193	8569	.	OverlapStart	126	HVAEP1_G026525
chr-15	24748296	24748939	Peak_194	8565	.	OverlapStart	85	HVAEP1_G027907
chr-5	11222350	11222894	Peak_195	8558	.	Upstream	4757	HVAEP1_G009455
chr-10	31408198	31408840	Peak_196	8553	.	OverlapStart	16	HVAEP1_G018626
chr-4	758087	758566	Peak_197	8546	.	Downstream	11296	HVAEP1_G007361
chr-1	47015217	47015635	Peak_198	8544	.	Upstream	15105	HVAEP1_G001461
chr-3	32668916	32669513	Peak_199	8526	.	OverlapStart	35	HVAEP1_G006179
chr-10	45289056	45289648	Peak_200	8521	.	OverlapStart	13	HVAEP1_G019068
chr-2	36464293	36465067	Peak_201	8501	.	OverlapStart	106	HVAEP1_G003822
chr-9	19865285	19865822	Peak_202	8462	.	Upstream	4573	HVAEP1_G016242
chr-2	46051177	46051661	Peak_203	8459	.	OverlapStart	116	HVAEP1_G004138
chr-9	63416470	63417084	Peak_204	8446	.	Upstream	5287	HVAEP1_G017664
chr-1	35249383	35250010	Peak_205	8421	.	Downstream	69136	HVAEP1_G001097
chr-8	27106795	27107295	Peak_206	8407	.	Upstream	18361	HVAEP1_G014545
chr-12	17647840	17649198	Peak_207	8384	.	Downstream	4980	HVAEP1_G021842
chr-1	16265424	16265934	Peak_208	8371	.	Downstream	55804	HVAEP1_G000433
chr-6	38871752	38872441	Peak_209	8368	.	Upstream	9513	HVAEP1_G011642
chr-11	50390116	50390722	Peak_210	8366	.	OverlapStart	36	HVAEP1_G021053
chr-4	30992170	30992840	Peak_211	8325	.	OverlapStart	15	HVAEP1_G008341
chr-12	72161124	72161728	Peak_212	8321	.	OverlapStart	13	HVAEP1_G023558
chr-5	11840020	11840703	Peak_213	8315	.	Downstream	12327	HVAEP1_G009484
chr-11	7714158	7714699	Peak_214	8309	.	Upstream	396	HVAEP1_G019622
chr-8	56447859	56448340	Peak_215	8307	.	Upstream	8895	HVAEP1_G015436
chr-6	24224744	24225633	Peak_216	8293	.	PeakInsideFeature	516	HVAEP1_G011248
chr-11	32821696	32822289	Peak_217	8292	.	OverlapStart	137	HVAEP1_G020450
chr-5	9041456	9041925	Peak_218	8274	.	OverlapStart	23	HVAEP1_G009380
chr-12	10656623	10657360	Peak_219	8269	.	OverlapStart	113	HVAEP1_G021632
chr-11	37379694	37380543	Peak_220	8253	.	Upstream	2985	HVAEP1_G020630
chr-15	15528499	15529128	Peak_221	8237	.	OverlapStart	104	HVAEP1_G027629
chr-15	32746783	32747444	Peak_222	8233	.	OverlapStart	249	HVAEP1_G028150
chr-8	35358090	35358604	Peak_223	8223	.	OverlapStart	21	HVAEP1_G014808
chr-8	3866116	3866695	Peak_224	8217	.	OverlapStart	156	HVAEP1_G013811
chr-2	35012351	35013022	Peak_225	8217	.	OverlapStart	63	HVAEP1_G003775
chr-8	30345210	30345831	Peak_226	8192	.	OverlapStart	82	HVAEP1_G014647
chr-1	72941765	72942503	Peak_227	8188	.	PeakInsideFeature	370	HVAEP1_G002382
chr-12	54145623	54146249	Peak_228	8186	.	OverlapStart	21	HVAEP1_G023008
chr-9	2540071	2540651	Peak_229	8179	.	Upstream	5787	HVAEP1_G015629
chr-10	39384518	39385069	Peak_230	8175	.	OverlapStart	41	HVAEP1_G018878
chr-4	9871186	9871747	Peak_231	8143	.	Downstream	29262	HVAEP1_G007625
chr-14	24999007	24999597	Peak_232	8140	.	Downstream	14384	HVAEP1_G026547
chr-9	3404662	3405677	Peak_233	8133	.	OverlapStart	133	HVAEP1_G015668
chr-4	40737928	40738548	Peak_234	8127	.	OverlapStart	48	HVAEP1_G008651
chr-15	7430235	7430815	Peak_235	8125	.	OverlapStart	33	HVAEP1_G027390
chr-2	71553660	71555007	Peak_236	8122	.	Upstream	16504	HVAEP1_G004984
chr-15	45804507	45805457	Peak_237	8120	.	OverlapStart	152	HVAEP1_G028578
chr-13	26161539	26162421	Peak_238	8119	.	OverlapStart	283	HVAEP1_G024862
chr-14	17155921	17156385	Peak_239	8102	.	Upstream	5372	HVAEP1_G026325
chr-11	19335295	19335924	Peak_240	8090	.	OverlapStart	34	HVAEP1_G019990
chr-5	613941	614607	Peak_241	8080	.	Upstream	4117	HVAEP1_G009073
chr-14	42065642	42066275	Peak_242	8071	.	Downstream	15422	HVAEP1_G027101
chr-2	14911487	14912276	Peak_243	8058	.	Upstream	3645	HVAEP1_G003098
chr-11	15276809	15277356	Peak_244	8047	.	Upstream	18581	HVAEP1_G019872
chr-15	15403096	15403928	Peak_245	8044	.	Upstream	7705	HVAEP1_G027626
chr-15	32658875	32659514	Peak_246	8020	.	PeakInsideFeature	10652	HVAEP1_G028147
chr-4	26475826	26476510	Peak_247	8006	.	PeakInsideFeature	1021	HVAEP1_G008204
chr-1	35293610	35294742	Peak_248	8004	.	NA	NA	NA
chr-2	45065688	45066329	Peak_249	7999	.	OverlapStart	98	HVAEP1_G004099
chr-2	3662220	3662841	Peak_250	7993	.	PeakInsideFeature	4192	HVAEP1_G002749
chr-1	56997981	56998553	Peak_251	7988	.	OverlapStart	9	HVAEP1_G001794
chr-13	54886597	54887427	Peak_252	7980	.	Downstream	9663	HVAEP1_G025781
chr-2	34582972	34583611	Peak_253	7968	.	PeakInsideFeature	4428	HVAEP1_G003758
chr-6	48337299	48338069	Peak_254	7963	.	OverlapStart	325	HVAEP1_G011929
chr-6	3039555	3040444	Peak_255	7958	.	Downstream	1907	HVAEP1_G010508
chr-5	13068758	13069205	Peak_256	7951	.	OverlapStart	112	HVAEP1_G009535
chr-7	8043121	8043677	Peak_257	7944	.	OverlapStart	97	HVAEP1_G012660
chr-8	20109048	20109607	Peak_258	7938	.	Downstream	15746	HVAEP1_G014303
chr-12	20273988	20274512	Peak_259	7896	.	OverlapStart	37	HVAEP1_G021921
chr-13	52480050	52481469	Peak_260	7889	.	Downstream	23412	HVAEP1_G025699
chr-12	31323357	31323839	Peak_261	7887	.	OverlapStart	136	HVAEP1_G022302
chr-2	15518077	15518517	Peak_262	7886	.	OverlapStart	121	HVAEP1_G003112
chr-3	69691080	69693928	Peak_263	7886	.	Upstream	2791	HVAEP1_G007323
chr-9	13529000	13529590	Peak_264	7878	.	Upstream	747	HVAEP1_G016031
chr-9	27487700	27488154	Peak_265	7877	.	Upstream	1789	HVAEP1_G016469
chr-8	20849581	20850194	Peak_266	7856	.	OverlapStart	237	HVAEP1_G014333
chr-14	16511766	16512522	Peak_267	7851	.	OverlapStart	28	HVAEP1_G026307
chr-2	30110666	30111657	Peak_268	7848	.	OverlapStart	152	HVAEP1_G003606
chr-4	8969585	8970474	Peak_269	7847	.	Upstream	11153	HVAEP1_G007595
chr-4	11289003	11289545	Peak_270	7836	.	OverlapStart	109	HVAEP1_G007680
chr-2	42708282	42709472	Peak_271	7823	.	Upstream	26188	HVAEP1_G004032
chr-11	3460299	3461189	Peak_272	7818	.	Upstream	19255	HVAEP1_G019476
chr-6	33522812	33523642	Peak_273	7817	.	OverlapStart	233	HVAEP1_G011505
chr-4	41781132	41782142	Peak_274	7806	.	Upstream	1623	HVAEP1_G008688
chr-9	7107786	7108471	Peak_275	7797	.	OverlapStart	150	HVAEP1_G015809
chr-13	35506133	35506714	Peak_276	7784	.	Upstream	737	HVAEP1_G025165
chr-3	43901605	43902261	Peak_277	7782	.	Upstream	7734	HVAEP1_G006532
chr-15	24182283	24182914	Peak_278	7775	.	Upstream	4682	HVAEP1_G027882
chr-14	21195680	21196310	Peak_279	7774	.	Upstream	7494	HVAEP1_G026439
chr-12	9131418	9132074	Peak_280	7768	.	Upstream	34234	HVAEP1_G021578
chr-1	56047872	56048491	Peak_281	7757	.	Downstream	68663	HVAEP1_G001744
chr-10	19171860	19172875	Peak_282	7737	.	OverlapStart	150	HVAEP1_G018207
chr-13	49215718	49216350	Peak_283	7736	.	OverlapStart	193	HVAEP1_G025588
chr-11	35262897	35263826	Peak_284	7736	.	OverlapStart	28	HVAEP1_G020544
chr-9	40879327	40880047	Peak_285	7732	.	OverlapStart	183	HVAEP1_G016938
chr-15	22905573	22906091	Peak_286	7718	.	Upstream	1998	HVAEP1_G027845
chr-15	35814233	35814927	Peak_287	7717	.	PeakInsideFeature	18762	HVAEP1_G028231
chr-15	31206996	31208183	Peak_288	7705	.	Upstream	17858	HVAEP1_G028102
chr-6	53783596	53784333	Peak_289	7702	.	Upstream	1714	HVAEP1_G012085
chr-10	41311043	41311684	Peak_290	7694	.	Downstream	13169	HVAEP1_G018948
chr-3	520053	520847	Peak_291	7684	.	OverlapStart	26	HVAEP1_G005102
chr-2	60810071	60810664	Peak_292	7680	.	Upstream	617	HVAEP1_G004652
chr-8	14784763	14785277	Peak_293	7664	.	Upstream	6483	HVAEP1_G014152
chr-9	14673329	14673934	Peak_294	7663	.	Upstream	509	HVAEP1_G016064
chr-7	14929699	14930411	Peak_295	7658	.	OverlapStart	234	HVAEP1_G012906
chr-5	32471316	32471873	Peak_296	7652	.	PeakInsideFeature	4454	HVAEP1_G010054
chr-5	41436981	41437971	Peak_297	7645	.	Upstream	6622	HVAEP1_G010338
chr-6	24916159	24916662	Peak_298	7638	.	Upstream	8457	HVAEP1_G011269
chr-5	13822678	13823310	Peak_299	7638	.	OverlapStart	48	HVAEP1_G009550
chr-1	61309541	61309901	Peak_300	7636	.	Downstream	19266	HVAEP1_G001983
chr-1	61097966	61098626	Peak_301	7626	.	Downstream	26793	HVAEP1_G001976
chr-3	3457114	3457868	Peak_302	7625	.	OverlapStart	115	HVAEP1_G005214
chr-11	47128938	47129524	Peak_303	7624	.	OverlapStart	31	HVAEP1_G020951
chr-3	1964561	1965184	Peak_304	7619	.	PeakInsideFeature	403	HVAEP1_G005152
chr-15	43075966	43076556	Peak_305	7614	.	OverlapStart	38	HVAEP1_G028493
chr-2	8643615	8644297	Peak_306	7610	.	Upstream	2446	HVAEP1_G002868
chr-12	11197869	11198429	Peak_307	7588	.	OverlapStart	45	HVAEP1_G021647
chr-13	9386294	9386733	Peak_308	7587	.	Upstream	27257	HVAEP1_G024342
chr-13	8932175	8933022	Peak_309	7581	.	Downstream	3368	HVAEP1_G024331
chr-11	3691812	3692488	Peak_310	7574	.	Downstream	31085	HVAEP1_G019480
chr-9	18690341	18691125	Peak_311	7568	.	OverlapStart	12	HVAEP1_G016208
chr-6	60036093	60036747	Peak_312	7561	.	Downstream	24571	HVAEP1_G012281
chr-10	41070398	41071039	Peak_313	7560	.	Upstream	2128	HVAEP1_G018936
chr-12	38351750	38352280	Peak_314	7558	.	OverlapStart	129	HVAEP1_G022510
chr-10	22306076	22307052	Peak_315	7550	.	OverlapStart	265	HVAEP1_G018333
chr-13	53491024	53491582	Peak_316	7541	.	OverlapStart	231	HVAEP1_G025725
chr-8	31978641	31979376	Peak_317	7538	.	OverlapStart	79	HVAEP1_G014710
chr-10	36151533	36152047	Peak_318	7521	.	Upstream	3973	HVAEP1_G018777
chr-11	11461853	11463077	Peak_319	7520	.	OverlapStart	66	HVAEP1_G019739
chr-7	4359914	4360695	Peak_320	7518	.	Downstream	14171	HVAEP1_G012505
chr-3	7974980	7975638	Peak_321	7516	.	OverlapStart	89	HVAEP1_G005350
chr-9	44047973	44049199	Peak_322	7516	.	Upstream	1343	HVAEP1_G017066
chr-1	62903896	62904499	Peak_323	7515	.	Upstream	20680	HVAEP1_G002018
chr-4	27941151	27941829	Peak_324	7515	.	OverlapStart	164	HVAEP1_G008253
chr-12	46532631	46533153	Peak_325	7511	.	Upstream	2222	HVAEP1_G022782
chr-15	52084244	52084862	Peak_326	7510	.	OverlapStart	68	HVAEP1_G028814
chr-10	6769888	6771430	Peak_327	7498	.	PeakInsideFeature	25557	HVAEP1_G017839
chr-2	13861562	13862096	Peak_328	7494	.	Upstream	64069	HVAEP1_G003063
chr-1	47661265	47662105	Peak_329	7480	.	Upstream	7156	HVAEP1_G001474
chr-4	47366018	47367092	Peak_330	7463	.	OverlapStart	456	HVAEP1_G008884
chr-15	52051314	52052150	Peak_331	7460	.	OverlapStart	252	HVAEP1_G028812
chr-7	6724108	6725150	Peak_332	7457	.	Upstream	11281	HVAEP1_G012619
chr-9	58887445	58888818	Peak_333	7446	.	OverlapStart	445	HVAEP1_G017531
chr-12	74667241	74668006	Peak_334	7432	.	OverlapStart	51	HVAEP1_G023649
chr-7	38915439	38916008	Peak_335	7429	.	OverlapStart	124	HVAEP1_G013604
chr-14	26281174	26281736	Peak_336	7429	.	OverlapStart	102	HVAEP1_G026591
chr-9	56824173	56825080	Peak_337	7416	.	OverlapStart	379	HVAEP1_G017462
chr-3	64964108	64964662	Peak_338	7411	.	Upstream	3354	HVAEP1_G007197
chr-15	23257792	23258448	Peak_339	7407	.	OverlapStart	82	HVAEP1_G027861
chr-12	11542259	11542891	Peak_340	7395	.	OverlapStart	85	HVAEP1_G021663
chr-9	38888772	38889582	Peak_341	7395	.	Upstream	1379	HVAEP1_G016871
chr-13	19592894	19593512	Peak_342	7375	.	Upstream	40884	HVAEP1_G024624
chr-12	16273014	16273545	Peak_343	7374	.	Downstream	28789	HVAEP1_G021807
chr-12	46283691	46284224	Peak_344	7371	.	OverlapStart	39	HVAEP1_G022769
chr-3	24777583	24778156	Peak_345	7366	.	OverlapStart	99	HVAEP1_G005928
chr-3	39733698	39734271	Peak_346	7363	.	OverlapStart	6	HVAEP1_G006390
chr-10	41738531	41739142	Peak_347	7354	.	Upstream	4498	HVAEP1_G018967
chr-7	13388387	13389145	Peak_348	7352	.	OverlapStart	34	HVAEP1_G012849
chr-13	41615232	41616000	Peak_349	7346	.	OverlapStart	112	HVAEP1_G025343
chr-2	49381548	49382012	Peak_350	7341	.	Upstream	648	HVAEP1_G004259
chr-10	26789282	26790044	Peak_351	7336	.	OverlapStart	4	HVAEP1_G018471
chr-1	73193090	73193562	Peak_352	7335	.	OverlapStart	122	HVAEP1_G002391
chr-1	47786175	47788293	Peak_353	7308	.	NA	NA	NA
chr-11	38059942	38061083	Peak_354	7303	.	PeakInsideFeature	4016	HVAEP1_G020647
chr-2	14933783	14934328	Peak_355	7286	.	Downstream	6490	HVAEP1_G003099
chr-6	2522460	2523286	Peak_356	7282	.	OverlapEnd	4049	HVAEP1_G010489
chr-8	22479924	22480493	Peak_357	7281	.	OverlapStart	56	HVAEP1_G014383
chr-10	52191522	52191817	Peak_358	7271	.	Downstream	35564	HVAEP1_G019255
chr-2	516336	516856	Peak_359	7271	.	Upstream	5594	HVAEP1_G002680
chr-6	3275425	3276072	Peak_360	7268	.	OverlapStart	145	HVAEP1_G010513
chr-15	4343268	4344065	Peak_361	7263	.	Downstream	2603	HVAEP1_G027279
chr-15	25451168	25451791	Peak_362	7254	.	OverlapStart	17	HVAEP1_G027931
chr-15	8315241	8315828	Peak_363	7250	.	Downstream	1976	HVAEP1_G027418
chr-2	15359087	15359661	Peak_364	7245	.	OverlapStart	104	HVAEP1_G003107
chr-6	42623842	42624389	Peak_365	7245	.	OverlapStart	190	HVAEP1_G011750
chr-9	31230782	31231545	Peak_366	7236	.	OverlapStart	179	HVAEP1_G016580
chr-1	79649406	79649844	Peak_367	7231	.	OverlapStart	100	HVAEP1_G002609
chr-10	14010193	14010609	Peak_368	7220	.	Upstream	504	HVAEP1_G018067
chr-1	73421811	73422225	Peak_369	7214	.	Upstream	1378	HVAEP1_G002400
chr-6	45666268	45667820	Peak_370	7212	.	OverlapStart	50	HVAEP1_G011841
chr-6	58055523	58056253	Peak_371	7197	.	Upstream	1030	HVAEP1_G012220
chr-15	21751333	21752034	Peak_372	7193	.	OverlapStart	79	HVAEP1_G027805
chr-15	5005707	5006151	Peak_373	7190	.	Upstream	6288	HVAEP1_G027299
chr-14	9239	10039	Peak_374	7189	.	Downstream	59694	HVAEP1_G025826
chr-3	68641946	68642732	Peak_375	7182	.	Upstream	9647	HVAEP1_G007276
chr-4	50752829	50753993	Peak_376	7161	.	PeakInsideFeature	22414	HVAEP1_G009008
chr-1	55893070	55893656	Peak_377	7137	.	NA	NA	NA
chr-1	70186442	70187746	Peak_378	7129	.	OverlapStart	246	HVAEP1_G002266
chr-1	35242820	35243302	Peak_379	7120	.	Downstream	62501	HVAEP1_G001097
chr-1	60745188	60745683	Peak_380	7120	.	OverlapStart	132	HVAEP1_G001963
chr-13	15683633	15684229	Peak_381	7117	.	PeakInsideFeature	80488	HVAEP1_G024516
chr-13	23549145	23549692	Peak_382	7104	.	OverlapStart	94	HVAEP1_G024785
chr-4	44107295	44107888	Peak_383	7097	.	OverlapStart	50	HVAEP1_G008761
chr-13	51419307	51419865	Peak_384	7096	.	Upstream	1569	HVAEP1_G025662
chr-14	37742005	37743360	Peak_385	7095	.	Downstream	11662	HVAEP1_G026976
chr-9	57944247	57945040	Peak_386	7095	.	OverlapStart	33	HVAEP1_G017502
chr-6	61160160	61160802	Peak_387	7086	.	Upstream	7325	HVAEP1_G012321
chr-7	20157928	20158400	Peak_388	7086	.	Upstream	936	HVAEP1_G013052
chr-12	50720684	50721246	Peak_389	7068	.	Upstream	12109	HVAEP1_G022896
chr-10	38391729	38392295	Peak_390	7065	.	OverlapStart	62	HVAEP1_G018853
chr-9	11624764	11625812	Peak_391	7057	.	Upstream	960	HVAEP1_G015965
chr-13	2061096	2062042	Peak_392	7049	.	Upstream	1155	HVAEP1_G024119
chr-12	64831522	64832774	Peak_393	7037	.	OverlapStart	22	HVAEP1_G023343
chr-11	44357765	44358352	Peak_394	7036	.	Downstream	11756	HVAEP1_G020867
chr-5	24981261	24981724	Peak_395	7010	.	OverlapStart	65	HVAEP1_G009857
chr-12	83731625	83732184	Peak_396	7006	.	OverlapStart	113	HVAEP1_G023942
chr-15	27396927	27397585	Peak_397	7006	.	Downstream	6441	HVAEP1_G027999
chr-14	32283011	32283718	Peak_398	7001	.	OverlapStart	111	HVAEP1_G026797
chr-3	3567616	3568700	Peak_399	7001	.	OverlapStart	222	HVAEP1_G005217
chr-8	35261247	35262083	Peak_400	6992	.	OverlapStart	226	HVAEP1_G014806
chr-4	3864721	3865550	Peak_401	6989	.	Upstream	16128	HVAEP1_G007436
chr-8	59121461	59122061	Peak_402	6988	.	OverlapStart	35	HVAEP1_G015515
chr-1	29557821	29558666	Peak_403	6973	.	Upstream	1260	HVAEP1_G000868
chr-11	30654297	30654944	Peak_404	6951	.	PeakInsideFeature	5268	HVAEP1_G020375
chr-7	32533983	32534372	Peak_405	6951	.	Upstream	604	HVAEP1_G013379
chr-9	42002926	42003438	Peak_406	6948	.	OverlapStart	21	HVAEP1_G016969
chr-5	38312967	38313666	Peak_407	6946	.	Upstream	546	HVAEP1_G010221
chr-5	17930490	17931020	Peak_408	6944	.	OverlapStart	3	HVAEP1_G009668
chr-4	18084260	18085155	Peak_409	6937	.	OverlapStart	44	HVAEP1_G007935
chr-9	25023017	25023600	Peak_410	6937	.	OverlapStart	205	HVAEP1_G016404
chr-2	5913543	5914505	Peak_411	6934	.	Upstream	5539	HVAEP1_G002805
chr-14	2504239	2504843	Peak_412	6931	.	Upstream	2705	HVAEP1_G025890
chr-9	55918194	55918733	Peak_413	6928	.	OverlapStart	22	HVAEP1_G017436
chr-8	52806259	52806950	Peak_414	6925	.	Downstream	14129	HVAEP1_G015367
chr-3	46927628	46928315	Peak_415	6922	.	OverlapStart	25	HVAEP1_G006642
chr-15	24428300	24428555	Peak_416	6920	.	Upstream	13382	HVAEP1_G027894
chr-11	27414693	27415266	Peak_417	6917	.	OverlapStart	38	HVAEP1_G020274
chr-1	64525483	64526259	Peak_418	6910	.	Upstream	12795	HVAEP1_G002071
chr-8	30495975	30496701	Peak_419	6908	.	Upstream	1131	HVAEP1_G014649
chr-3	64931181	64931614	Peak_420	6905	.	Downstream	20901	HVAEP1_G007193
chr-3	10084836	10085389	Peak_421	6889	.	Upstream	3070	HVAEP1_G005435
chr-4	8975451	8975860	Peak_422	6884	.	Upstream	5527	HVAEP1_G007595
chr-9	10944628	10945344	Peak_423	6881	.	OverlapStart	95	HVAEP1_G015941
chr-15	50197521	50198347	Peak_424	6881	.	OverlapStart	31	HVAEP1_G028736
chr-6	3264043	3264855	Peak_425	6870	.	Upstream	3773	HVAEP1_G010512
chr-3	46617878	46618562	Peak_426	6869	.	OverlapStart	41	HVAEP1_G006629
chr-11	31634624	31635146	Peak_427	6845	.	Downstream	2673	HVAEP1_G020412
chr-13	3547145	3547671	Peak_428	6843	.	Downstream	1500	HVAEP1_G024164
chr-15	7717651	7718035	Peak_429	6843	.	Upstream	2756	HVAEP1_G027400
chr-6	60653125	60653725	Peak_430	6841	.	OverlapStart	62	HVAEP1_G012301
chr-9	23320648	23321265	Peak_431	6827	.	Upstream	352	HVAEP1_G016335
chr-9	9081828	9082504	Peak_432	6825	.	Upstream	3168	HVAEP1_G015867
chr-6	20358821	20359444	Peak_433	6806	.	OverlapStart	94	HVAEP1_G011097
chr-14	17150796	17151268	Peak_435	6798	.	Upstream	251	HVAEP1_G026325
chr-12	33676901	33677373	Peak_436	6796	.	Upstream	2365	HVAEP1_G022372
chr-12	9348549	9349146	Peak_437	6773	.	OverlapStart	34	HVAEP1_G021587
chr-9	40138313	40139088	Peak_438	6760	.	OverlapStart	138	HVAEP1_G016910
chr-8	33822970	33826625	Peak_439	6753	.	Downstream	23057	HVAEP1_G014762
chr-2	29820013	29820726	Peak_440	6752	.	OverlapStart	89	HVAEP1_G003591
chr-15	10872277	10872892	Peak_441	6751	.	OverlapStart	85	HVAEP1_G027488
chr-2	40452588	40453067	Peak_442	6743	.	Upstream	554	HVAEP1_G003965
chr-12	14283126	14283785	Peak_443	6743	.	PeakInsideFeature	12932	HVAEP1_G021739
chr-15	20012422	20013031	Peak_444	6738	.	Upstream	376	HVAEP1_G027746
chr-3	15941309	15942118	Peak_445	6729	.	Downstream	8127	HVAEP1_G005639
chr-5	40773674	40774491	Peak_446	6725	.	OverlapStart	293	HVAEP1_G010311
chr-9	36338369	36339186	Peak_447	6721	.	Downstream	10347	HVAEP1_G016777
chr-1	28086893	28087482	Peak_448	6711	.	Upstream	16690	HVAEP1_G000808
chr-2	27876992	27877652	Peak_449	6708	.	Upstream	81460	HVAEP1_G003522
chr-10	29638344	29638979	Peak_450	6706	.	Upstream	701	HVAEP1_G018565
chr-8	13508134	13508703	Peak_451	6701	.	Downstream	36457	HVAEP1_G014106
chr-2	55962047	55962704	Peak_452	6697	.	Upstream	473	HVAEP1_G004506
chr-2	31522384	31522925	Peak_453	6692	.	OverlapStart	219	HVAEP1_G003654
chr-2	45149800	45150702	Peak_454	6692	.	Downstream	25320	HVAEP1_G004101
chr-6	12036136	12036836	Peak_455	6687	.	OverlapStart	2	HVAEP1_G010794
chr-11	24886458	24888046	Peak_456	6686	.	Upstream	5693	HVAEP1_G020184
chr-3	50757833	50758674	Peak_457	6680	.	Downstream	19034	HVAEP1_G006748
chr-14	36335120	36336058	Peak_458	6678	.	Downstream	6115	HVAEP1_G026931
chr-13	18142576	18143498	Peak_459	6675	.	OverlapStart	110	HVAEP1_G024581
chr-9	11139107	11139590	Peak_460	6673	.	Downstream	6961	HVAEP1_G015946
chr-1	49680183	49680653	Peak_462	6670	.	OverlapStart	60	HVAEP1_G001530
chr-4	31095822	31096431	Peak_463	6669	.	OverlapStart	20	HVAEP1_G008343
chr-8	49842820	49843686	Peak_464	6662	.	Downstream	21101	HVAEP1_G015272
chr-3	1194863	1195575	Peak_465	6656	.	OverlapStart	65	HVAEP1_G005127
chr-11	15638585	15639170	Peak_466	6653	.	PeakInsideFeature	3067	HVAEP1_G019880
chr-9	16667717	16668164	Peak_467	6649	.	Upstream	1740	HVAEP1_G016137
chr-1	35335767	35336251	Peak_468	6649	.	Upstream	69305	HVAEP1_G001099
chr-5	11791914	11792681	Peak_469	6645	.	Downstream	14578	HVAEP1_G009479
chr-13	51581708	51581949	Peak_470	6644	.	Upstream	5273	HVAEP1_G025668
chr-4	13868379	13868926	Peak_471	6637	.	Upstream	724	HVAEP1_G007781
chr-13	55680982	55681730	Peak_472	6631	.	Upstream	14322	HVAEP1_G025825
chr-9	19640000	19640752	Peak_473	6626	.	OverlapStart	12	HVAEP1_G016234
chr-15	23788015	23789729	Peak_474	6625	.	NA	NA	NA
chr-9	15734495	15735065	Peak_475	6625	.	OverlapStart	198	HVAEP1_G016112
chr-8	51316426	51317005	Peak_476	6624	.	Upstream	608	HVAEP1_G015320
chr-14	2533276	2534078	Peak_477	6615	.	Upstream	21871	HVAEP1_G025891
chr-9	25011502	25012017	Peak_478	6612	.	Upstream	842	HVAEP1_G016403
chr-9	59829398	59829953	Peak_479	6605	.	OverlapStart	15	HVAEP1_G017561
chr-10	21645731	21646366	Peak_480	6596	.	PeakInsideFeature	325	HVAEP1_G018313
chr-2	15503978	15504686	Peak_481	6589	.	Downstream	10676	HVAEP1_G003110
chr-13	3415898	3416366	Peak_482	6589	.	Upstream	10612	HVAEP1_G024161
chr-6	35188168	35188617	Peak_483	6584	.	OverlapStart	219	HVAEP1_G011547
chr-13	38903479	38904043	Peak_484	6583	.	OverlapStart	40	HVAEP1_G025274
chr-4	33578207	33579142	Peak_485	6582	.	PeakInsideFeature	17323	HVAEP1_G008433
chr-1	14711076	14711457	Peak_486	6579	.	Upstream	24200	HVAEP1_G000391
chr-14	3585759	3586366	Peak_487	6578	.	Upstream	18309	HVAEP1_G025922
chr-6	9013106	9013618	Peak_488	6575	.	Upstream	13260	HVAEP1_G010710
chr-15	1860742	1861298	Peak_489	6575	.	Upstream	2675	HVAEP1_G027204
chr-12	35116915	35117515	Peak_490	6573	.	OverlapStart	2	HVAEP1_G022414
chr-4	604836	605477	Peak_491	6572	.	OverlapStart	94	HVAEP1_G007355
chr-12	58577404	58578339	Peak_492	6564	.	OverlapStart	125	HVAEP1_G023147
chr-9	39789913	39791396	Peak_493	6563	.	Upstream	59368	HVAEP1_G016902
chr-2	14417838	14418755	Peak_494	6553	.	Downstream	11860	HVAEP1_G003081
chr-4	47402095	47402927	Peak_495	6548	.	Upstream	21905	HVAEP1_G008885
chr-13	49390331	49390727	Peak_496	6545	.	OverlapStart	151	HVAEP1_G025595
chr-11	4344380	4345232	Peak_497	6537	.	OverlapStart	114	HVAEP1_G019507
chr-6	46950470	46951066	Peak_498	6537	.	OverlapStart	163	HVAEP1_G011878
chr-14	4637663	4638393	Peak_499	6534	.	OverlapStart	112	HVAEP1_G025955
chr-4	18985564	18986022	Peak_500	6524	.	PeakInsideFeature	404	HVAEP1_G007962
chr-12	44489867	44490378	Peak_501	6523	.	Downstream	2260	HVAEP1_G022707
chr-12	71288540	71289158	Peak_502	6522	.	Upstream	14533	HVAEP1_G023528
chr-4	16158505	16159388	Peak_503	6518	.	OverlapStart	141	HVAEP1_G007855
chr-2	58684075	58684584	Peak_504	6516	.	OverlapStart	108	HVAEP1_G004589
chr-12	43781018	43781510	Peak_505	6513	.	OverlapStart	64	HVAEP1_G022688
chr-6	34026883	34029164	Peak_506	6499	.	Downstream	44604	HVAEP1_G011518
chr-8	31095001	31095477	Peak_507	6491	.	Upstream	389	HVAEP1_G014676
chr-2	41476140	41476726	Peak_508	6488	.	OverlapStart	12	HVAEP1_G004000
chr-8	49148314	49148870	Peak_509	6479	.	OverlapStart	42	HVAEP1_G015248
chr-11	39402402	39402872	Peak_510	6479	.	Upstream	3354	HVAEP1_G020685
chr-1	32225954	32226957	Peak_511	6476	.	OverlapStart	237	HVAEP1_G000988
chr-10	41803711	41804215	Peak_512	6471	.	Upstream	3275	HVAEP1_G018969
chr-15	42606972	42607568	Peak_513	6469	.	OverlapStart	33	HVAEP1_G028472
chr-8	17574393	17574891	Peak_514	6468	.	Downstream	46301	HVAEP1_G014220
chr-3	49877092	49877951	Peak_515	6466	.	OverlapStart	198	HVAEP1_G006728
chr-2	47409691	47410527	Peak_516	6460	.	Upstream	8129	HVAEP1_G004189
chr-5	34502369	34502839	Peak_517	6457	.	Upstream	1702	HVAEP1_G010118
chr-2	54462538	54462983	Peak_518	6456	.	OverlapStart	49	HVAEP1_G004460
chr-2	47388492	47388985	Peak_519	6453	.	Downstream	14010	HVAEP1_G004188
chr-9	30586141	30587181	Peak_520	6447	.	OverlapStart	277	HVAEP1_G016553
chr-13	9645578	9646137	Peak_521	6446	.	PeakInsideFeature	3690	HVAEP1_G024349
chr-8	27154203	27154840	Peak_522	6443	.	Downstream	25994	HVAEP1_G014546
chr-10	6600966	6601896	Peak_523	6441	.	OverlapStart	135	HVAEP1_G017833
chr-12	44163038	44163534	Peak_524	6436	.	Upstream	793	HVAEP1_G022697
chr-2	9723167	9724071	Peak_525	6435	.	OverlapStart	201	HVAEP1_G002904
chr-5	29113730	29114276	Peak_526	6425	.	OverlapStart	168	HVAEP1_G009961
chr-10	52819111	52819668	Peak_527	6423	.	OverlapStart	33	HVAEP1_G019283
chr-1	35253274	35253694	Peak_528	6423	.	Downstream	72924	HVAEP1_G001097
chr-15	39346489	39347146	Peak_529	6418	.	OverlapStart	210	HVAEP1_G028343
chr-3	3875123	3875638	Peak_530	6416	.	Downstream	47341	HVAEP1_G005222
chr-6	57998338	57998912	Peak_531	6414	.	Upstream	19293	HVAEP1_G012218
chr-7	14354723	14355463	Peak_532	6406	.	OverlapStart	50	HVAEP1_G012888
chr-15	12195886	12196682	Peak_533	6399	.	OverlapStart	111	HVAEP1_G027521
chr-15	44579357	44579930	Peak_534	6397	.	Upstream	594	HVAEP1_G028540
chr-11	3344134	3345018	Peak_535	6389	.	OverlapStart	253	HVAEP1_G019473
chr-2	17240836	17241244	Peak_536	6387	.	Downstream	8675	HVAEP1_G003166
chr-10	37709133	37709632	Peak_537	6386	.	OverlapStart	57	HVAEP1_G018822
chr-7	18111908	18112613	Peak_538	6373	.	Upstream	8020	HVAEP1_G013009
chr-15	7182536	7183549	Peak_539	6365	.	Downstream	27140	HVAEP1_G027381
chr-8	7195366	7195758	Peak_540	6361	.	Downstream	26377	HVAEP1_G013905
chr-13	38057403	38058288	Peak_541	6360	.	OverlapStart	98	HVAEP1_G025242
chr-13	46329922	46330449	Peak_542	6359	.	Upstream	6024	HVAEP1_G025496
chr-2	2551929	2553567	Peak_543	6355	.	Upstream	4841	HVAEP1_G002728
chr-2	69324533	69325327	Peak_544	6354	.	OverlapStart	81	HVAEP1_G004923
chr-2	31692440	31692767	Peak_545	6352	.	OverlapStart	107	HVAEP1_G003659
chr-12	36790604	36791179	Peak_546	6350	.	OverlapStart	3	HVAEP1_G022467
chr-9	58648578	58649342	Peak_547	6340	.	OverlapStart	131	HVAEP1_G017523
chr-5	3725414	3726012	Peak_548	6340	.	OverlapStart	63	HVAEP1_G009209
chr-1	25672647	25673476	Peak_549	6338	.	OverlapStart	176	HVAEP1_G000727
chr-12	62730739	62731463	Peak_550	6332	.	OverlapStart	27	HVAEP1_G023271
chr-14	33224177	33224582	Peak_551	6329	.	Upstream	507	HVAEP1_G026827
chr-12	9511069	9511867	Peak_552	6316	.	OverlapStart	213	HVAEP1_G021597
chr-14	18914906	18916045	Peak_553	6309	.	Upstream	2050	HVAEP1_G026370
chr-10	31320450	31321801	Peak_554	6304	.	Downstream	21580	HVAEP1_G018622
chr-5	12139870	12140422	Peak_555	6298	.	Upstream	7148	HVAEP1_G009500
chr-3	56905707	56906424	Peak_556	6297	.	OverlapStart	120	HVAEP1_G006932
chr-2	28394415	28395107	Peak_557	6293	.	OverlapStart	121	HVAEP1_G003543
chr-2	60525391	60525832	Peak_558	6292	.	Downstream	45184	HVAEP1_G004644
chr-5	2588167	2588782	Peak_559	6291	.	OverlapStart	108	HVAEP1_G009174
chr-3	64994033	64994639	Peak_560	6288	.	OverlapStart	75	HVAEP1_G007200
chr-5	34636232	34636830	Peak_561	6288	.	OverlapStart	119	HVAEP1_G010123
chr-5	40526557	40527480	Peak_562	6285	.	Upstream	11334	HVAEP1_G010301
chr-6	12943669	12944408	Peak_563	6283	.	Upstream	431	HVAEP1_G010821
chr-15	28729088	28729631	Peak_564	6275	.	OverlapStart	1	HVAEP1_G028035
chr-14	28294199	28294849	Peak_565	6268	.	OverlapStart	148	HVAEP1_G026663
chr-3	15081697	15082355	Peak_566	6266	.	OverlapStart	176	HVAEP1_G005612
chr-4	32712078	32712659	Peak_567	6266	.	PeakInsideFeature	9210	HVAEP1_G008401
chr-2	42192085	42192663	Peak_568	6263	.	OverlapStart	5	HVAEP1_G004024
chr-2	65711041	65711858	Peak_569	6257	.	Downstream	40447	HVAEP1_G004824
chr-7	1531834	1533351	Peak_570	6247	.	OverlapStart	314	HVAEP1_G012425
chr-14	19677876	19678606	Peak_571	6246	.	OverlapStart	298	HVAEP1_G026397
chr-3	18156387	18156794	Peak_572	6245	.	Upstream	1961	HVAEP1_G005720
chr-2	7435619	7436797	Peak_573	6244	.	Upstream	20952	HVAEP1_G002844
chr-2	23822964	23823613	Peak_574	6239	.	Downstream	32819	HVAEP1_G003399
chr-12	42555033	42555885	Peak_575	6234	.	PeakInsideFeature	19529	HVAEP1_G022657
chr-10	5064341	5064848	Peak_576	6226	.	OverlapStart	88	HVAEP1_G017800
chr-12	41383561	41384151	Peak_577	6225	.	Upstream	2378	HVAEP1_G022625
chr-9	49366039	49366711	Peak_578	6224	.	Upstream	3135	HVAEP1_G017221
chr-3	24054815	24055504	Peak_579	6220	.	OverlapStart	41	HVAEP1_G005906
chr-6	49799147	49799790	Peak_580	6219	.	Downstream	66330	HVAEP1_G011971
chr-12	60732340	60733095	Peak_581	6219	.	OverlapStart	9	HVAEP1_G023203
chr-9	27923623	27924921	Peak_582	6216	.	Upstream	9809	HVAEP1_G016480
chr-10	49022321	49022932	Peak_583	6215	.	OverlapStart	0	HVAEP1_G019162
chr-3	31650121	31650796	Peak_584	6213	.	Downstream	4631	HVAEP1_G006140
chr-11	38251039	38252007	Peak_585	6210	.	PeakInsideFeature	9768	HVAEP1_G020656
chr-13	9962365	9962905	Peak_586	6207	.	Upstream	7798	HVAEP1_G024357
chr-4	24586894	24587445	Peak_587	6206	.	OverlapStart	7	HVAEP1_G008144
chr-9	36912279	36913295	Peak_588	6206	.	PeakInsideFeature	11390	HVAEP1_G016797
chr-14	29036717	29037491	Peak_589	6199	.	OverlapStart	45	HVAEP1_G026689
chr-9	40364078	40364670	Peak_590	6193	.	Upstream	6554	HVAEP1_G016919
chr-15	34544442	34545070	Peak_591	6173	.	OverlapStart	66	HVAEP1_G028190
chr-6	29756701	29757421	Peak_592	6161	.	Upstream	4826	HVAEP1_G011403
chr-14	20364644	20365211	Peak_593	6149	.	OverlapStart	128	HVAEP1_G026419
chr-12	5187395	5188144	Peak_594	6145	.	Upstream	25217	HVAEP1_G021434
chr-1	34065526	34066868	Peak_595	6145	.	PeakInsideFeature	18207	HVAEP1_G001067
chr-13	5585115	5585614	Peak_596	6138	.	Upstream	8109	HVAEP1_G024233
chr-9	4766244	4766892	Peak_597	6131	.	Upstream	20539	HVAEP1_G015725
chr-9	37624270	37624968	Peak_598	6130	.	Upstream	34165	HVAEP1_G016822
chr-10	42305340	42305924	Peak_599	6129	.	Upstream	898	HVAEP1_G018989
chr-9	15301252	15302097	Peak_600	6128	.	OverlapStart	118	HVAEP1_G016096
chr-2	18667491	18668109	Peak_601	6127	.	Downstream	19800	HVAEP1_G003214
chr-9	32216777	32217321	Peak_602	6125	.	Upstream	9266	HVAEP1_G016615
chr-10	54270543	54271321	Peak_603	6123	.	OverlapStart	26	HVAEP1_G019347
chr-3	61454741	61455254	Peak_604	6117	.	Upstream	10326	HVAEP1_G007080
chr-15	15417625	15418208	Peak_605	6113	.	Downstream	6699	HVAEP1_G027626
chr-3	51051135	51051673	Peak_606	6106	.	OverlapStart	263	HVAEP1_G006754
chr-3	42170867	42171730	Peak_607	6098	.	OverlapStart	61	HVAEP1_G006469
chr-15	31186886	31187569	Peak_608	6092	.	Upstream	668	HVAEP1_G028101
chr-15	43725992	43726571	Peak_609	6092	.	OverlapStart	211	HVAEP1_G028517
chr-9	27967832	27971619	Peak_610	6091	.	Upstream	55262	HVAEP1_G016480
chr-3	112468	113137	Peak_611	6086	.	Downstream	37910	HVAEP1_G005083
chr-14	37831972	37832311	Peak_612	6082	.	Upstream	13157	HVAEP1_G026976
chr-15	52733111	52733672	Peak_613	6080	.	Upstream	1773	HVAEP1_G028837
chr-1	73017745	73018243	Peak_614	6078	.	PeakInsideFeature	14680	HVAEP1_G002385
chr-11	41654407	41655041	Peak_615	6074	.	Downstream	16587	HVAEP1_G020777
chr-12	6490276	6490741	Peak_616	6066	.	Upstream	12569	HVAEP1_G021487
chr-4	43212292	43212864	Peak_617	6065	.	OverlapStart	86	HVAEP1_G008736
chr-3	20759654	20760051	Peak_618	6055	.	Downstream	7038	HVAEP1_G005819
chr-9	12484350	12485055	Peak_619	6053	.	PeakInsideFeature	1769	HVAEP1_G015999
[truncated: 49,534 more rows]

## Sheet: Conserved H3K4me1 Peaks
Chromosome	Start	Stop	Peak ID	Peak Score	Strand	Position Relative to Gene	Distance to TSS	Nearest Gene
[truncated: 1,782 more rows]

[truncated: 4 more sheets: Conserved H3K4me3 Peaks, Conserved H3K27me3 Peaks, Conserved ATAC-seq Peaks, Legend]
