# Supplementary material for: A chromosome-scale epigenetic map of the Hydra genome reveals conserved regulators of cell state
Source: HighWire-hosted journal article supplement (doi:10.1101/gr.277040.122), 2023-01-13
Supplement: Supplemental_Data_S5.xlsx [file Supplemental_Data_S5.xlsx]

## Sheet: conMotATAC_finalhits
Chromosome	Motif Start	Motif End	Motif JASPAR ID	Motif Score	Motif Strand	Distance to Nearest TSS	Location Relative to Nearest Gene	Nearest Gene ID
chr-1	43295	43305	MA0648.1	4.54e-05	+	121	PeakInsideFeature	HVAEP1_G000002
chr-1	43296	43304	MA0682.2	9.36e-05	+	121	PeakInsideFeature	HVAEP1_G000002
chr-1	43296	43304	MA0711.1	3.54e-05	+	121	PeakInsideFeature	HVAEP1_G000002
chr-1	43296	43304	MA0915.1	3.54e-05	+	121	PeakInsideFeature	HVAEP1_G000002
chr-1	43296	43304	MA1443.1	5.82e-05	+	121	PeakInsideFeature	HVAEP1_G000002
chr-1	43296	43304	MA1547.1	5.82e-05	+	121	PeakInsideFeature	HVAEP1_G000002
chr-1	43315	43332	MA0851.1	3.51e-05	+	144	PeakInsideFeature	HVAEP1_G000002
chr-1	43316	43327	MA0909.2	4.93e-05	+	142	PeakInsideFeature	HVAEP1_G000002
chr-1	43318	43333	MA1487.1	2.7e-05	+	146	PeakInsideFeature	HVAEP1_G000002
chr-1	43325	43340	MA0074.1	5.2e-05	-	153	PeakInsideFeature	HVAEP1_G000002
chr-1	43325	43340	MA1532.1	8.53e-05	-	153	PeakInsideFeature	HVAEP1_G000002
chr-1	193826	193841	MA0074.1	5.2e-05	+	167	PeakInsideFeature	HVAEP1_G000009
chr-1	193826	193841	MA1532.1	8.53e-05	+	167	PeakInsideFeature	HVAEP1_G000009
chr-1	193833	193848	MA1487.1	2.7e-05	-	160	PeakInsideFeature	HVAEP1_G000009
chr-1	193834	193851	MA0851.1	3.51e-05	-	158	PeakInsideFeature	HVAEP1_G000009
chr-1	193839	193850	MA0909.2	4.93e-05	-	156	PeakInsideFeature	HVAEP1_G000009
chr-1	193862	193870	MA0682.2	9.36e-05	-	134	PeakInsideFeature	HVAEP1_G000009
chr-1	193862	193870	MA0711.1	3.54e-05	-	134	PeakInsideFeature	HVAEP1_G000009
chr-1	193862	193870	MA0915.1	3.54e-05	-	134	PeakInsideFeature	HVAEP1_G000009
chr-1	193862	193870	MA1443.1	5.82e-05	-	134	PeakInsideFeature	HVAEP1_G000009
chr-1	193862	193870	MA1547.1	5.82e-05	-	134	PeakInsideFeature	HVAEP1_G000009
chr-1	509754	509775	MA1651.1	8.87e-06	+	11140	Upstream	HVAEP1_G000015
chr-1	509760	509771	MA0748.2	7.98e-05	+	11141	Upstream	HVAEP1_G000015
chr-1	509760	509771	MA1460.1	1.99e-05	+	11141	Upstream	HVAEP1_G000015
chr-1	509765	509774	MA0671.1	4.22e-05	+	11145	Upstream	HVAEP1_G000015
chr-1	510001	510014	MA0499.2	8.98e-05	-	11383	Upstream	HVAEP1_G000015
chr-1	510002	510012	MA0145.3	9.67e-05	+	11383	Upstream	HVAEP1_G000015
chr-1	599180	599194	MA0509.2	1.81e-06	+	3241	Upstream	HVAEP1_G000017
chr-1	599180	599194	MA0798.2	5.27e-06	+	3241	Upstream	HVAEP1_G000017
chr-1	599218	599233	MA1487.1	1.37e-05	+	3203	Upstream	HVAEP1_G000017
chr-1	599297	599318	MA1651.1	2.29e-05	+	3121	Upstream	HVAEP1_G000017
chr-1	599303	599314	MA0748.2	7.98e-05	+	3120	Upstream	HVAEP1_G000017
chr-1	599303	599314	MA1460.1	1.99e-05	+	3120	Upstream	HVAEP1_G000017
chr-1	599508	599520	MA0796.1	6.74e-05	-	2914	Upstream	HVAEP1_G000017
chr-1	599508	599520	MA0797.1	8.83e-05	+	2914	Upstream	HVAEP1_G000017
chr-1	599544	599557	MA1457.1	8.84e-05	-	2878	Upstream	HVAEP1_G000017
chr-1	599545	599558	MA0086.2	8.47e-05	+	2877	Upstream	HVAEP1_G000017
chr-1	599545	599558	MA0499.2	3.91e-05	-	2877	Upstream	HVAEP1_G000017
chr-1	599546	599556	MA0145.3	9.67e-05	+	2877	Upstream	HVAEP1_G000017
chr-1	599551	599563	MA1655.1	7.34e-05	-	2871	Upstream	HVAEP1_G000017
chr-1	599552	599567	MA0535.1	8.34e-05	-	2869	Upstream	HVAEP1_G000017
chr-1	599555	599568	MA0749.1	3.76e-05	+	2867	Upstream	HVAEP1_G000017
chr-1	599560	599567	MA0498.2	3.51e-05	+	2865	Upstream	HVAEP1_G000017
chr-1	599560	599568	MA0774.1	7.54e-05	+	2864	Upstream	HVAEP1_G000017
chr-1	599560	599568	MA0775.1	6.75e-05	+	2864	Upstream	HVAEP1_G000017
chr-1	599625	599640	MA0534.1	1.97e-06	+	2796	Upstream	HVAEP1_G000017
chr-1	599625	599640	MA1146.1	9.44e-06	+	2796	Upstream	HVAEP1_G000017
chr-1	599625	599640	MA1147.1	1.79e-05	+	2796	Upstream	HVAEP1_G000017
chr-1	599625	599640	MA1538.1	8.02e-05	+	2796	Upstream	HVAEP1_G000017
chr-1	599625	599640	MA1539.1	8.29e-05	-	2796	Upstream	HVAEP1_G000017
chr-1	691347	691359	MA0091.1	6.64e-05	+	NA	NA	NA
chr-1	691347	691360	MA1109.1	4.54e-05	-	NA	NA	NA
chr-1	691347	691360	MA1618.1	3.5e-05	-	NA	NA	NA
chr-1	691347	691361	MA0832.1	3.35e-05	+	NA	NA	NA
chr-1	691348	691359	MA0521.1	6.89e-05	-	NA	NA	NA
chr-1	691348	691361	MA1123.2	2.79e-05	-	NA	NA	NA
chr-1	691348	691361	MA1642.1	2.38e-05	-	NA	NA	NA
chr-1	691349	691359	MA0461.2	5.11e-05	-	NA	NA	NA
chr-1	691349	691359	MA0669.1	3.01e-05	-	NA	NA	NA
chr-1	691349	691359	MA0816.1	8.26e-05	+	NA	NA	NA
chr-1	691349	691359	MA1467.1	5.61e-06	-	NA	NA	NA
chr-1	691349	691359	MA1638.1	2.44e-05	-	NA	NA	NA
chr-1	691349	691360	MA0545.1	2.98e-05	-	NA	NA	NA
chr-1	919807	919820	MA0507.1	4.9e-05	+	106	PeakInsideFeature	HVAEP1_G000027
chr-1	919828	919839	MA0748.2	1.96e-05	-	86	PeakInsideFeature	HVAEP1_G000027
chr-1	919828	919839	MA1460.1	5.11e-05	-	86	PeakInsideFeature	HVAEP1_G000027
chr-1	919891	919909	MA1459.1	4.38e-05	-	19	PeakInsideFeature	HVAEP1_G000027
chr-1	919895	919909	MA0852.2	3.45e-05	+	17	PeakInsideFeature	HVAEP1_G000027
chr-1	919915	919928	MA0262.1	3.62e-05	+	2	OverlapStart	HVAEP1_G000027
chr-1	15969625	15969638	MA0135.1	6.47e-06	-	16	Upstream	HVAEP1_G000426
chr-1	15969643	15969659	MA0864.2	7.4e-05	+	4	OverlapStart	HVAEP1_G000426
chr-1	15969654	15969673	MA0139.1	2.12e-05	+	16	PeakInsideFeature	HVAEP1_G000426
chr-1	15969660	15969676	MA0081.2	9.8e-05	+	21	PeakInsideFeature	HVAEP1_G000426
chr-1	15969662	15969673	MA0765.2	4.33e-05	+	20	PeakInsideFeature	HVAEP1_G000426
chr-1	15969663	15969673	MA0028.2	5.25e-05	-	21	PeakInsideFeature	HVAEP1_G000426
chr-1	15969663	15969673	MA0624.1	6.87e-05	+	21	PeakInsideFeature	HVAEP1_G000426
chr-1	15969663	15969673	MA0759.1	5.42e-05	-	21	PeakInsideFeature	HVAEP1_G000426
chr-1	15969663	15969674	MA0136.2	5.46e-05	-	21	PeakInsideFeature	HVAEP1_G000426
chr-1	15969663	15969675	MA0641.1	4.28e-05	-	22	PeakInsideFeature	HVAEP1_G000426
chr-1	15969663	15969675	MA1483.1	5.14e-05	-	22	PeakInsideFeature	HVAEP1_G000426
chr-1	15969665	15969675	MA0599.1	4.94e-05	+	23	PeakInsideFeature	HVAEP1_G000426
chr-1	15969667	15969677	MA0443.1	2.74e-05	-	25	PeakInsideFeature	HVAEP1_G000426
chr-1	15969695	15969711	MA0733.1	7e-06	+	56	PeakInsideFeature	HVAEP1_G000426
chr-1	15969697	15969707	MA0632.2	5.19e-05	-	55	PeakInsideFeature	HVAEP1_G000426
chr-1	15969698	15969709	MA0472.2	3.8e-05	-	56	PeakInsideFeature	HVAEP1_G000426
chr-1	15969698	15969709	MA0506.1	1.39e-07	-	56	PeakInsideFeature	HVAEP1_G000426
chr-1	15969698	15969709	MA0522.3	8.5e-05	+	56	PeakInsideFeature	HVAEP1_G000426
chr-1	15969698	15969709	MA1648.1	8.31e-05	+	56	PeakInsideFeature	HVAEP1_G000426
chr-1	15969738	15969748	MA0707.1	7.78e-05	+	96	PeakInsideFeature	HVAEP1_G000426
chr-1	15969738	15969749	MA0899.1	4.45e-05	+	96	PeakInsideFeature	HVAEP1_G000426
chr-1	15969739	15969748	MA1530.1	6.84e-05	+	96	PeakInsideFeature	HVAEP1_G000426
chr-1	19138438	19138451	MA0018.4	1.35e-05	+	107	PeakInsideFeature	HVAEP1_G000513
chr-1	19138438	19138451	MA1632.1	8.28e-05	+	107	PeakInsideFeature	HVAEP1_G000513
chr-1	19138441	19138451	MA1438.1	1.84e-05	-	105	PeakInsideFeature	HVAEP1_G000513
chr-1	19198596	19198605	MA0511.2	1.46e-05	-	339	Upstream	HVAEP1_G000515
chr-1	20108143	20108163	MA0080.5	1.24e-05	-	2547	PeakInsideFeature	HVAEP1_G000554
chr-1	20108145	20108159	MA0640.2	8.17e-05	+	2548	PeakInsideFeature	HVAEP1_G000554
chr-1	20108145	20108161	MA0081.2	2.52e-05	+	2547	PeakInsideFeature	HVAEP1_G000554
chr-1	20108145	20108166	MA0050.2	1.09e-05	+	2545	PeakInsideFeature	HVAEP1_G000554
chr-1	20108146	20108160	MA0062.3	2.33e-05	+	2547	PeakInsideFeature	HVAEP1_G000554
chr-1	20108146	20108160	MA0473.3	2.81e-05	-	2547	PeakInsideFeature	HVAEP1_G000554
chr-1	20108146	20108160	MA0761.2	5.52e-05	-	2547	PeakInsideFeature	HVAEP1_G000554
chr-1	20108146	20108161	MA0598.3	2.18e-05	+	2547	PeakInsideFeature	HVAEP1_G000554
chr-1	20108147	20108162	MA0517.1	1.02e-05	+	2546	PeakInsideFeature	HVAEP1_G000554
chr-1	20108149	20108161	MA1508.1	8.48e-05	-	2545	PeakInsideFeature	HVAEP1_G000554
chr-1	20108149	20108162	MA1623.1	1.65e-06	-	2545	PeakInsideFeature	HVAEP1_G000554
chr-1	20108280	20108291	MA0925.1	9.15e-05	-	2415	PeakInsideFeature	HVAEP1_G000554
chr-1	20108373	20108383	MA1549.1	7.23e-05	-	2322	PeakInsideFeature	HVAEP1_G000554
chr-1	20108377	20108389	MA0639.1	7.77e-05	+	2317	PeakInsideFeature	HVAEP1_G000554
chr-1	20108377	20108389	MA0843.1	5.15e-05	+	2317	PeakInsideFeature	HVAEP1_G000554
chr-1	20108390	20108405	MA1145.1	1.17e-05	+	2303	PeakInsideFeature	HVAEP1_G000554
chr-1	20108391	20108403	MA0656.1	4.61e-06	-	2303	PeakInsideFeature	HVAEP1_G000554
chr-1	20108391	20108403	MA0840.1	5.01e-06	-	2303	PeakInsideFeature	HVAEP1_G000554
chr-1	20108391	20108404	MA1632.1	3.48e-05	-	2303	PeakInsideFeature	HVAEP1_G000554
chr-1	20108391	20108406	MA0492.1	5.73e-05	-	2302	PeakInsideFeature	HVAEP1_G000554
chr-1	20108392	20108405	MA0488.1	4.48e-05	-	2302	PeakInsideFeature	HVAEP1_G000554
chr-1	20108421	20108429	MA1536.1	9.92e-05	-	2275	PeakInsideFeature	HVAEP1_G000554
chr-1	20108582	20108598	MA0744.2	8.44e-05	+	2110	PeakInsideFeature	HVAEP1_G000554
chr-1	20108583	20108595	MA0918.1	2.4e-05	-	2111	PeakInsideFeature	HVAEP1_G000554
chr-1	20108585	20108593	MA0775.1	7.72e-05	+	2111	PeakInsideFeature	HVAEP1_G000554
chr-1	20108585	20108598	MA0499.2	1.34e-05	-	2109	PeakInsideFeature	HVAEP1_G000554
chr-1	20108585	20108598	MA0745.2	7.63e-05	-	2109	PeakInsideFeature	HVAEP1_G000554
chr-1	20108585	20108598	MA1631.1	7.52e-05	-	2109	PeakInsideFeature	HVAEP1_G000554
chr-1	20108586	20108598	MA0500.2	2.52e-05	-	2108	PeakInsideFeature	HVAEP1_G000554
chr-1	20108586	20108598	MA1593.1	1.28e-05	+	2108	PeakInsideFeature	HVAEP1_G000554
chr-1	20108586	20108598	MA1619.1	2.51e-05	+	2108	PeakInsideFeature	HVAEP1_G000554
chr-1	20108587	20108597	MA0691.1	2.95e-05	+	2108	PeakInsideFeature	HVAEP1_G000554
chr-1	20108587	20108598	MA0521.1	1.16e-05	+	2108	PeakInsideFeature	HVAEP1_G000554
chr-1	20108594	20108612	MA0729.1	2.26e-05	-	2097	PeakInsideFeature	HVAEP1_G000554
chr-1	20109062	20109074	MA0070.1	3.91e-05	+	1632	PeakInsideFeature	HVAEP1_G000554
chr-1	20109063	20109074	MA0060.3	1.06e-05	+	1632	PeakInsideFeature	HVAEP1_G000554
chr-1	20109063	20109074	MA1644.1	1.31e-05	+	1632	PeakInsideFeature	HVAEP1_G000554
chr-1	20109065	20109073	MA0611.1	2.91e-05	+	1631	PeakInsideFeature	HVAEP1_G000554
chr-1	20110587	20110601	MA0010.1	3.58e-07	-	106	PeakInsideFeature	HVAEP1_G000554
chr-1	20110667	20110684	MA0883.1	1.68e-05	-	25	PeakInsideFeature	HVAEP1_G000554
chr-1	20110670	20110679	MA0714.1	4.59e-05	+	26	PeakInsideFeature	HVAEP1_G000554
chr-1	20110670	20110680	MA0648.1	4.71e-06	+	25	PeakInsideFeature	HVAEP1_G000554
chr-1	20110670	20110680	MA0891.1	1.44e-06	+	25	PeakInsideFeature	HVAEP1_G000554
chr-1	20110671	20110679	MA0682.2	1.27e-05	+	25	PeakInsideFeature	HVAEP1_G000554
chr-1	20110671	20110679	MA0711.1	6.33e-06	+	25	PeakInsideFeature	HVAEP1_G000554
chr-1	20110671	20110679	MA0719.1	9.82e-05	+	25	PeakInsideFeature	HVAEP1_G000554
chr-1	20110671	20110679	MA0915.1	6.33e-06	+	25	PeakInsideFeature	HVAEP1_G000554
chr-1	20110671	20110679	MA1443.1	3.54e-05	+	25	PeakInsideFeature	HVAEP1_G000554
chr-1	20110671	20110679	MA1547.1	5.19e-05	+	25	PeakInsideFeature	HVAEP1_G000554
chr-1	20110671	20110682	MA0467.1	1.63e-05	-	24	PeakInsideFeature	HVAEP1_G000554
chr-1	20110713	20110723	MA0867.2	9.65e-05	+	18	Upstream	HVAEP1_G000554
chr-1	20110761	20110773	MA0528.2	2.52e-05	-	67	Upstream	HVAEP1_G000554
chr-1	20110763	20110778	MA0697.1	6.58e-05	+	70	Upstream	HVAEP1_G000554
chr-1	20212009	20212021	MA0465.2	2.81e-05	+	109	PeakInsideFeature	HVAEP1_G000558
chr-1	20212010	20212021	MA0878.2	9.42e-05	+	109	PeakInsideFeature	HVAEP1_G000558
chr-1	20212010	20212021	MA0909.2	3.25e-05	+	109	PeakInsideFeature	HVAEP1_G000558
chr-1	20212011	20212019	MA0924.1	4.28e-05	+	109	PeakInsideFeature	HVAEP1_G000558
chr-1	20212011	20212021	MA0913.2	7.58e-05	+	108	PeakInsideFeature	HVAEP1_G000558
chr-1	20212068	20212085	MA0112.3	2e-05	+	48	PeakInsideFeature	HVAEP1_G000558
chr-1	20212074	20212091	MA0112.3	3.13e-05	-	42	PeakInsideFeature	HVAEP1_G000558
chr-1	20212075	20212090	MA0258.2	5.04e-05	+	42	PeakInsideFeature	HVAEP1_G000558
chr-1	20212076	20212087	MA0141.3	8.96e-05	-	43	PeakInsideFeature	HVAEP1_G000558
chr-1	20212076	20212089	MA0592.3	1.68e-05	-	42	PeakInsideFeature	HVAEP1_G000558
chr-1	20212076	20212091	MA0505.1	4.31e-05	-	41	PeakInsideFeature	HVAEP1_G000558
chr-1	20212077	20212087	MA0643.1	3.61e-05	-	42	PeakInsideFeature	HVAEP1_G000558
chr-1	20212077	20212088	MA1540.1	6.46e-05	-	42	PeakInsideFeature	HVAEP1_G000558
chr-1	20212077	20212092	MA0768.1	3.59e-05	-	40	PeakInsideFeature	HVAEP1_G000558
chr-1	20212077	20212095	MA0149.1	8.29e-05	-	38	PeakInsideFeature	HVAEP1_G000558
chr-1	20212087	20212099	MA0911.1	4.04e-05	-	31	PeakInsideFeature	HVAEP1_G000558
chr-1	20212088	20212098	MA0594.2	4.91e-05	-	31	PeakInsideFeature	HVAEP1_G000558
chr-1	20212088	20212099	MA0651.1	3.05e-05	-	31	PeakInsideFeature	HVAEP1_G000558
chr-1	20212088	20212099	MA0906.1	5.07e-05	-	31	PeakInsideFeature	HVAEP1_G000558
chr-1	20212088	20212099	MA1506.1	5.93e-05	-	31	PeakInsideFeature	HVAEP1_G000558
chr-1	20212089	20212106	MA1461.1	8.26e-05	-	27	PeakInsideFeature	HVAEP1_G000558
chr-1	20212090	20212104	MA0069.1	6.59e-05	+	27	PeakInsideFeature	HVAEP1_G000558
chr-1	20212095	20212109	MA1645.1	9.64e-05	+	22	PeakInsideFeature	HVAEP1_G000558
chr-1	20212097	20212114	MA0159.1	5.27e-05	-	19	PeakInsideFeature	HVAEP1_G000558
chr-1	20212097	20212115	MA1149.1	3.28e-05	-	18	PeakInsideFeature	HVAEP1_G000558
chr-1	20212099	20212109	MA0763.1	5.56e-05	-	20	PeakInsideFeature	HVAEP1_G000558
chr-1	20212107	20212115	MA0775.1	3.26e-05	+	13	PeakInsideFeature	HVAEP1_G000558
chr-1	20212129	20212141	MA0205.2	5.22e-05	+	11	Upstream	HVAEP1_G000558
chr-1	20212129	20212143	MA1700.1	9.17e-06	+	12	Upstream	HVAEP1_G000558
chr-1	20212131	20212145	MA1700.1	9.48e-05	+	14	Upstream	HVAEP1_G000558
chr-1	20212132	20212141	MA0450.1	9e-05	+	12	Upstream	HVAEP1_G000558
chr-1	20212149	20212161	MA0095.2	3.96e-05	-	31	Upstream	HVAEP1_G000558
chr-1	20212164	20212174	MA1501.1	9.19e-05	-	45	Upstream	HVAEP1_G000558
chr-1	20212370	20212381	MA0458.1	8.67e-05	+	251	Upstream	HVAEP1_G000558
chr-1	20212383	20212396	MA0750.2	2.55e-05	-	265	Upstream	HVAEP1_G000558
chr-1	20212384	20212395	MA0076.2	1.44e-05	+	265	Upstream	HVAEP1_G000558
chr-1	20212384	20212395	MA0454.1	2.35e-05	-	265	Upstream	HVAEP1_G000558
chr-1	20212384	20212395	MA0765.2	1.26e-05	+	265	Upstream	HVAEP1_G000558
chr-1	20212384	20212396	MA0131.2	3.69e-05	+	266	Upstream	HVAEP1_G000558
chr-1	20212384	20212396	MA1646.1	3.29e-06	-	266	Upstream	HVAEP1_G000558
chr-1	20212385	20212391	MA0260.1	4.85e-05	-	264	Upstream	HVAEP1_G000558
chr-1	20212385	20212395	MA0028.2	2.68e-05	-	266	Upstream	HVAEP1_G000558
chr-1	20212385	20212395	MA0098.3	2.95e-05	-	266	Upstream	HVAEP1_G000558
chr-1	20212385	20212395	MA0156.2	1.57e-05	-	266	Upstream	HVAEP1_G000558
chr-1	20212385	20212395	MA0474.2	1.39e-05	-	266	Upstream	HVAEP1_G000558
chr-1	20212385	20212395	MA0475.2	1.57e-05	-	266	Upstream	HVAEP1_G000558
chr-1	20212385	20212395	MA0759.1	2.36e-05	-	266	Upstream	HVAEP1_G000558
chr-1	20212385	20212395	MA0760.1	4.81e-05	-	266	Upstream	HVAEP1_G000558
chr-1	20212385	20212395	MA0763.1	3.37e-05	-	266	Upstream	HVAEP1_G000558
chr-1	20212385	20212395	MA1542.1	1.72e-05	+	266	Upstream	HVAEP1_G000558
chr-1	20212385	20212396	MA0136.2	9.19e-05	-	266	Upstream	HVAEP1_G000558
chr-1	20212385	20212397	MA1483.1	6.63e-05	-	267	Upstream	HVAEP1_G000558
chr-1	20212386	20212394	MA0916.1	9.81e-05	-	266	Upstream	HVAEP1_G000558
chr-1	20212386	20212396	MA1484.1	1.22e-05	-	267	Upstream	HVAEP1_G000558
chr-1	20212387	20212394	MA0026.1	7.28e-05	-	266	Upstream	HVAEP1_G000558
chr-1	20608257	20608274	MA0851.1	5.93e-06	+	641	Upstream	HVAEP1_G000574
chr-1	20608259	20608269	MA0546.1	4.99e-05	+	642	Upstream	HVAEP1_G000574
chr-1	20608259	20608270	MA0032.2	2.28e-05	+	642	Upstream	HVAEP1_G000574
chr-1	20608259	20608271	MA0846.1	7.27e-07	+	641	Upstream	HVAEP1_G000574
chr-1	20608260	20608271	MA0013.1	4.25e-05	+	641	Upstream	HVAEP1_G000574
chr-1	20608260	20608271	MA0047.3	5.7e-05	+	641	Upstream	HVAEP1_G000574
chr-1	20608260	20608271	MA0481.3	7.33e-05	+	641	Upstream	HVAEP1_G000574
chr-1	20608260	20608271	MA0593.1	2.33e-05	+	641	Upstream	HVAEP1_G000574
chr-1	20608260	20608271	MA1103.2	7.54e-05	+	641	Upstream	HVAEP1_G000574
chr-1	20608260	20608271	MA1606.1	7.41e-05	+	641	Upstream	HVAEP1_G000574
chr-1	20608260	20608271	MA1683.1	8.06e-05	+	641	Upstream	HVAEP1_G000574
chr-1	20608261	20608272	MA0480.1	9.34e-05	-	640	Upstream	HVAEP1_G000574
chr-1	20608262	20608270	MA0157.2	4.28e-05	+	640	Upstream	HVAEP1_G000574
chr-1	20608262	20608270	MA0613.1	4.28e-05	+	640	Upstream	HVAEP1_G000574
chr-1	20608262	20608270	MA0614.1	4.28e-05	+	640	Upstream	HVAEP1_G000574
chr-1	20608262	20608270	MA0920.1	5.92e-05	+	640	Upstream	HVAEP1_G000574
chr-1	20608262	20608270	MA1489.1	4.28e-05	+	640	Upstream	HVAEP1_G000574
chr-1	20685090	20685105	MA1147.1	7.95e-05	+	13	PeakInsideFeature	HVAEP1_G000575
chr-1	20685092	20685101	MA0921.1	9.57e-06	+	12	PeakInsideFeature	HVAEP1_G000575
chr-1	20685092	20685103	MA1703.1	8.15e-05	+	13	PeakInsideFeature	HVAEP1_G000575
chr-1	20685092	20685107	MA0777.1	6.83e-06	-	15	PeakInsideFeature	HVAEP1_G000575
chr-1	20685093	20685105	MA0776.1	4.98e-05	+	15	PeakInsideFeature	HVAEP1_G000575
chr-1	20685094	20685104	MA0766.2	2.75e-05	+	15	PeakInsideFeature	HVAEP1_G000575
chr-1	20685198	20685215	MA0851.1	7.65e-05	+	122	PeakInsideFeature	HVAEP1_G000575
chr-1	20685208	20685217	MA0676.1	2.96e-05	+	128	PeakInsideFeature	HVAEP1_G000575
chr-1	20685208	20685218	MA0459.1	1.45e-05	+	129	PeakInsideFeature	HVAEP1_G000575
chr-1	20707919	20707930	MA0907.1	6.79e-05	-	1403	Upstream	HVAEP1_G000576
chr-1	20707920	20707935	MA0541.1	3.41e-05	-	1400	Upstream	HVAEP1_G000576
chr-1	20707920	20707936	MA0469.3	5.66e-06	-	1399	Upstream	HVAEP1_G000576
chr-1	20707920	20707936	MA0864.2	2.79e-05	+	1399	Upstream	HVAEP1_G000576
chr-1	20707921	20707935	MA0470.2	1.47e-05	+	1399	Upstream	HVAEP1_G000576
chr-1	20707921	20707935	MA0758.1	3.06e-06	-	1399	Upstream	HVAEP1_G000576
chr-1	20707921	20707936	MA0541.1	4.3e-06	+	1399	Upstream	HVAEP1_G000576
chr-1	20707922	20707932	MA0632.2	7.83e-05	-	1400	Upstream	HVAEP1_G000576
chr-1	20707922	20707934	MA0024.3	2.19e-05	+	1399	Upstream	HVAEP1_G000576
chr-1	20707922	20707934	MA0865.1	8e-05	-	1399	Upstream	HVAEP1_G000576
chr-1	20707923	20707933	MA1099.2	8.01e-05	-	1399	Upstream	HVAEP1_G000576
chr-1	20707924	20707935	MA1122.1	1.24e-05	+	1398	Upstream	HVAEP1_G000576
chr-1	20811240	20811250	MA1635.1	7.97e-05	+	2748	Upstream	HVAEP1_G000579
chr-1	21162378	21162388	MA0665.1	2.77e-05	+	73	Upstream	HVAEP1_G000594
chr-1	21346891	21346905	MA0069.1	3.46e-05	+	24	Upstream	HVAEP1_G000598
chr-1	21346895	21346901	MA0260.1	9.71e-05	-	24	Upstream	HVAEP1_G000598
chr-1	21346950	21346957	MA0498.2	8.06e-05	+	79	Upstream	HVAEP1_G000598
chr-1	21346950	21346958	MA0774.1	6.33e-06	+	80	Upstream	HVAEP1_G000598
chr-1	21385316	21385328	MA1421.1	6.04e-05	+	1265	Downstream	HVAEP1_G000601
chr-1	21385502	21385514	MA0148.4	6.35e-05	-	1079	Downstream	HVAEP1_G000601
chr-1	21385503	21385514	MA0047.3	4e-06	-	1079	Downstream	HVAEP1_G000601
chr-1	21385503	21385514	MA0481.3	3.29e-06	-	1079	Downstream	HVAEP1_G000601
chr-1	21385503	21385514	MA1103.2	1.18e-05	-	1079	Downstream	HVAEP1_G000601
chr-1	21385503	21385514	MA1606.1	3.94e-06	-	1079	Downstream	HVAEP1_G000601
chr-1	21385503	21385514	MA1683.1	6.17e-06	-	1079	Downstream	HVAEP1_G000601
chr-1	21385503	21385517	MA1607.1	4.4e-05	-	1077	Downstream	HVAEP1_G000601
chr-1	21385504	21385515	MA0458.1	5.64e-06	+	1078	Downstream	HVAEP1_G000601
chr-1	21385505	21385515	MA0546.1	6.02e-05	-	1077	Downstream	HVAEP1_G000601
chr-1	21385580	21385589	MA0921.1	4.41e-05	+	1003	OverlapEnd	HVAEP1_G000601
chr-1	21385580	21385591	MA1703.1	4.51e-05	+	1002	OverlapEnd	HVAEP1_G000601
chr-1	21385581	21385592	MA0036.3	8.87e-05	-	1001	PeakInsideFeature	HVAEP1_G000601
chr-1	21385582	21385592	MA0766.2	3.01e-05	+	1000	PeakInsideFeature	HVAEP1_G000601
chr-1	21385582	21385592	MA1701.1	1.53e-05	-	1000	PeakInsideFeature	HVAEP1_G000601
chr-1	21385583	21385591	MA0037.3	8.48e-05	+	1000	PeakInsideFeature	HVAEP1_G000601
chr-1	21385597	21385609	MA1479.1	6.21e-05	-	984	PeakInsideFeature	HVAEP1_G000601
chr-1	21386342	21386352	MA0514.1	3.16e-05	-	240	PeakInsideFeature	HVAEP1_G000601
chr-1	21386342	21386352	MA1152.1	8.89e-05	-	240	PeakInsideFeature	HVAEP1_G000601
chr-1	21386364	21386372	MA1440.1	8.55e-05	+	219	PeakInsideFeature	HVAEP1_G000601
chr-1	21386372	21386389	MA0896.1	1.25e-05	+	207	PeakInsideFeature	HVAEP1_G000601
chr-1	21386372	21386389	MA0897.1	8.41e-06	+	207	PeakInsideFeature	HVAEP1_G000601
chr-1	21386372	21386389	MA0898.1	1.17e-05	+	207	PeakInsideFeature	HVAEP1_G000601
chr-1	21386376	21386384	MA0611.1	4.56e-05	+	207	PeakInsideFeature	HVAEP1_G000601
chr-1	21386403	21386416	MA0086.2	1.93e-05	-	178	PeakInsideFeature	HVAEP1_G000601
chr-1	21386403	21386416	MA0499.2	8.94e-05	+	178	PeakInsideFeature	HVAEP1_G000601
chr-1	21386403	21386416	MA0745.2	5.12e-05	+	178	PeakInsideFeature	HVAEP1_G000601
chr-1	21386403	21386416	MA0830.2	3.26e-05	+	178	PeakInsideFeature	HVAEP1_G000601
chr-1	21386403	21386416	MA1631.1	6.9e-05	+	178	PeakInsideFeature	HVAEP1_G000601
chr-1	21386404	21386414	MA0048.2	9.25e-05	+	178	PeakInsideFeature	HVAEP1_G000601
chr-1	21386404	21386414	MA0664.1	8.73e-05	-	178	PeakInsideFeature	HVAEP1_G000601
chr-1	21386404	21386414	MA0820.1	9.91e-05	+	178	PeakInsideFeature	HVAEP1_G000601
chr-1	21386404	21386414	MA1558.1	1.34e-05	-	178	PeakInsideFeature	HVAEP1_G000601
chr-1	21386404	21386414	MA1559.1	1.11e-05	-	178	PeakInsideFeature	HVAEP1_G000601
chr-1	21386404	21386415	MA0103.3	6.69e-05	+	178	PeakInsideFeature	HVAEP1_G000601
chr-1	21386408	21386420	MA0070.1	9.53e-05	-	173	PeakInsideFeature	HVAEP1_G000601
chr-1	21386408	21386421	MA1639.1	2.95e-05	-	173	PeakInsideFeature	HVAEP1_G000601
chr-1	21386467	21386478	MA0060.3	9.82e-05	+	115	PeakInsideFeature	HVAEP1_G000601
chr-1	21386480	21386491	MA0002.2	5.37e-06	+	102	PeakInsideFeature	HVAEP1_G000601
chr-1	21386482	21386491	MA0242.1	7.18e-05	-	101	PeakInsideFeature	HVAEP1_G000601
chr-1	21386484	21386494	MA0023.1	1.99e-06	+	98	PeakInsideFeature	HVAEP1_G000601
chr-1	21386484	21386494	MA0101.1	1.12e-05	+	98	PeakInsideFeature	HVAEP1_G000601
chr-1	21386484	21386494	MA0107.1	8.3e-06	+	98	PeakInsideFeature	HVAEP1_G000601
chr-1	21386484	21386496	MA0022.1	4.82e-05	+	97	PeakInsideFeature	HVAEP1_G000601
chr-1	21386485	21386503	MA1600.1	1.56e-05	+	93	PeakInsideFeature	HVAEP1_G000601
chr-1	21386527	21386535	MA0611.1	2.91e-05	-	56	PeakInsideFeature	HVAEP1_G000601
chr-1	21421226	21421239	MA0592.3	5.46e-05	+	152	Upstream	HVAEP1_G000604
chr-1	21421226	21421240	MA1652.1	1.46e-05	+	153	Upstream	HVAEP1_G000604
chr-1	21421227	21421238	MA0103.3	5.71e-05	-	152	Upstream	HVAEP1_G000604
chr-1	21421227	21421238	MA0522.3	4.77e-05	-	152	Upstream	HVAEP1_G000604
chr-1	21421227	21421238	MA1540.1	8.58e-05	+	152	Upstream	HVAEP1_G000604
chr-1	21421227	21421238	MA1648.1	4.85e-05	-	152	Upstream	HVAEP1_G000604
chr-1	21421228	21421239	MA1111.1	9.01e-05	+	153	Upstream	HVAEP1_G000604
chr-1	21421229	21421247	MA0149.1	3.99e-05	+	158	Upstream	HVAEP1_G000604
chr-1	21421230	21421240	MA0599.1	6.97e-05	-	155	Upstream	HVAEP1_G000604
chr-1	21421230	21421242	MA0528.2	3.86e-05	+	156	Upstream	HVAEP1_G000604
chr-1	21421230	21421245	MA0591.1	4.49e-05	+	157	Upstream	HVAEP1_G000604
chr-1	21421231	21421246	MA0258.2	7.42e-05	+	158	Upstream	HVAEP1_G000604
chr-1	21421234	21421244	MA0764.2	4.46e-05	+	159	Upstream	HVAEP1_G000604
chr-1	23489552	23489564	MA0456.1	6.04e-05	+	1300	Upstream	HVAEP1_G000641
chr-1	23489552	23489565	MA0753.2	1.95e-05	+	1300	Upstream	HVAEP1_G000641
chr-1	23489552	23489566	MA0736.1	7.32e-05	+	1301	Upstream	HVAEP1_G000641
chr-1	23489553	23489563	MA0057.1	4.9e-05	-	1300	Upstream	HVAEP1_G000641
chr-1	23489554	23489564	MA1578.1	1.86e-05	+	1301	Upstream	HVAEP1_G000641
chr-1	23489554	23489565	MA1522.1	3.52e-05	+	1301	Upstream	HVAEP1_G000641
chr-1	23489554	23489566	MA1653.1	4.62e-05	+	1302	Upstream	HVAEP1_G000641
chr-1	23489555	23489566	MA0063.2	9.55e-05	+	1302	Upstream	HVAEP1_G000641
chr-1	23489582	23489594	MA1444.1	8.03e-05	-	1330	Upstream	HVAEP1_G000641
chr-1	23489593	23489604	MA1647.1	9.33e-06	+	1340	Upstream	HVAEP1_G000641
chr-1	23489595	23489609	MA0509.2	4.69e-05	+	1344	Upstream	HVAEP1_G000641
chr-1	23489595	23489609	MA0798.2	4.65e-05	+	1344	Upstream	HVAEP1_G000641
chr-1	23489613	23489628	MA0492.1	9.56e-05	-	1362	Upstream	HVAEP1_G000641
chr-1	23489616	23489624	MA0719.1	4.31e-06	-	1362	Upstream	HVAEP1_G000641
chr-1	23489686	23489701	MA0777.1	5.57e-05	+	1435	Upstream	HVAEP1_G000641
chr-1	23489687	23489696	MA0126.1	9.65e-05	-	1433	Upstream	HVAEP1_G000641
chr-1	23489687	23489696	MA0239.1	9.65e-05	-	1433	Upstream	HVAEP1_G000641
chr-1	23504479	23504497	MA1459.1	1.49e-06	-	99	Upstream	HVAEP1_G000642
chr-1	23504480	23504495	MA0492.1	6.9e-05	+	100	Upstream	HVAEP1_G000642
chr-1	23504482	23504494	MA0014.3	5.75e-05	+	99	Upstream	HVAEP1_G000642
chr-1	23637829	23637837	MA1440.1	8.55e-05	+	1555	PeakInsideFeature	HVAEP1_G000647
chr-1	23821571	23821587	MA0083.3	9.1e-05	+	503	Upstream	HVAEP1_G000655
chr-1	23821678	23821689	MA0002.2	2.33e-05	+	399	Upstream	HVAEP1_G000655
chr-1	23821678	23821690	MA0684.2	4.37e-05	-	398	Upstream	HVAEP1_G000655
chr-1	23821680	23821689	MA0242.1	2.89e-05	-	398	Upstream	HVAEP1_G000655
chr-1	23821680	23821689	MA0511.2	2.27e-05	-	398	Upstream	HVAEP1_G000655
chr-1	24446457	24446472	MA0768.1	6.33e-06	+	67	Upstream	HVAEP1_G000682
chr-1	24446468	24446481	MA0770.1	1.15e-05	-	57	Upstream	HVAEP1_G000682
chr-1	24446468	24446481	MA0771.1	1.45e-05	-	57	Upstream	HVAEP1_G000682
chr-1	24446471	24446483	MA1458.1	4.18e-06	+	54	Upstream	HVAEP1_G000682
chr-1	24446471	24446486	MA1579.1	2.33e-06	+	53	Upstream	HVAEP1_G000682
chr-1	24446472	24446482	MA0092.1	4.72e-05	-	54	Upstream	HVAEP1_G000682
chr-1	24446473	24446486	MA0486.2	5.05e-05	+	52	Upstream	HVAEP1_G000682
chr-1	24446473	24446486	MA0770.1	1.89e-05	+	52	Upstream	HVAEP1_G000682
chr-1	24446554	24446568	MA0863.1	8.45e-06	+	30	PeakInsideFeature	HVAEP1_G000682
chr-1	24446957	24446966	MA1554.1	8.08e-05	-	430	PeakInsideFeature	HVAEP1_G000682
chr-1	24447005	24447019	MA1629.1	3.87e-05	-	481	PeakInsideFeature	HVAEP1_G000682
chr-1	25428878	25428888	MA0819.1	6.13e-05	+	NA	NA	NA
chr-1	26783708	26783721	MA1124.1	4.36e-05	+	2377	Upstream	HVAEP1_G000761
chr-1	26783773	26783790	MA0851.1	1.97e-05	+	2310	Upstream	HVAEP1_G000761
chr-1	26783774	26783783	MA0676.1	2.14e-05	+	2313	Upstream	HVAEP1_G000761
chr-1	26783774	26783784	MA0459.1	2.15e-06	+	2312	Upstream	HVAEP1_G000761
chr-1	26783775	26783785	MA0546.1	6.5e-05	+	2311	Upstream	HVAEP1_G000761
chr-1	26783775	26783787	MA0846.1	6.71e-06	+	2310	Upstream	HVAEP1_G000761
chr-1	26784837	26784848	MA0703.2	1.05e-05	+	1249	Upstream	HVAEP1_G000761
chr-1	26784840	26784851	MA0703.2	1.25e-05	-	1246	Upstream	HVAEP1_G000761
chr-1	26784878	26784892	MA0030.1	5.49e-06	+	1206	Upstream	HVAEP1_G000761
chr-1	26784878	26784895	MA0851.1	8.93e-06	+	1205	Upstream	HVAEP1_G000761
chr-1	26784896	26784907	MA0040.1	1.11e-05	+	1190	Upstream	HVAEP1_G000761
chr-1	26784916	26784931	MA0517.1	2.05e-05	-	1168	Upstream	HVAEP1_G000761
chr-1	26784945	26784955	MA0546.1	8.25e-07	+	1141	Upstream	HVAEP1_G000761
chr-1	26784969	26784984	MA1419.1	7.89e-05	-	1115	Upstream	HVAEP1_G000761
chr-1	26784969	26784990	MA1418.1	1.35e-06	-	1112	Upstream	HVAEP1_G000761
chr-1	26784970	26784983	MA1623.1	8.76e-05	-	1115	Upstream	HVAEP1_G000761
chr-1	26784970	26784984	MA0772.1	6.51e-05	-	1114	Upstream	HVAEP1_G000761
chr-1	26784970	26784984	MA1420.1	1.34e-05	-	1114	Upstream	HVAEP1_G000761
chr-1	26784970	26784985	MA0653.1	2.42e-05	-	1114	Upstream	HVAEP1_G000761
chr-1	26784971	26784983	MA0544.1	3.78e-05	+	1114	Upstream	HVAEP1_G000761
chr-1	26784972	26784993	MA0050.2	5.25e-05	+	1109	Upstream	HVAEP1_G000761
chr-1	26784973	26784984	MA1647.1	1.37e-05	+	1113	Upstream	HVAEP1_G000761
chr-1	26784974	26784989	MA0517.1	2.48e-06	+	1110	Upstream	HVAEP1_G000761
chr-1	26784975	26784986	MA0076.2	5.41e-05	+	1111	Upstream	HVAEP1_G000761
chr-1	26784976	26784985	MA1509.1	9.37e-05	-	1111	Upstream	HVAEP1_G000761
chr-1	26784976	26784986	MA0098.3	7.79e-05	-	1110	Upstream	HVAEP1_G000761
chr-1	26784976	26784986	MA0156.2	6.55e-05	-	1110	Upstream	HVAEP1_G000761
chr-1	26784976	26784986	MA0474.2	4.04e-05	-	1110	Upstream	HVAEP1_G000761
chr-1	26784976	26784986	MA0475.2	4.01e-05	-	1110	Upstream	HVAEP1_G000761
chr-1	26784976	26784986	MA0624.1	2.49e-05	+	1110	Upstream	HVAEP1_G000761
chr-1	26784976	26784986	MA0625.1	3.87e-05	+	1110	Upstream	HVAEP1_G000761
chr-1	26784976	26784986	MA1525.1	1.64e-05	-	1110	Upstream	HVAEP1_G000761
chr-1	26784976	26784987	MA0762.1	3.1e-05	-	1110	Upstream	HVAEP1_G000761
chr-1	26784976	26784988	MA1483.1	8.59e-05	-	1109	Upstream	HVAEP1_G000761
chr-1	26784976	26784989	MA1623.1	3.36e-05	-	1109	Upstream	HVAEP1_G000761
chr-1	26784977	26784987	MA1484.1	6.76e-05	-	1109	Upstream	HVAEP1_G000761
chr-1	26785038	26785049	MA0446.1	2.24e-05	+	1048	Upstream	HVAEP1_G000761
chr-1	26785057	26785067	MA0099.3	7.49e-05	-	1029	Upstream	HVAEP1_G000761
chr-1	26785057	26785067	MA1132.1	2.18e-05	+	1029	Upstream	HVAEP1_G000761
chr-1	26785057	26785067	MA1142.1	4.89e-05	+	1029	Upstream	HVAEP1_G000761
chr-1	26785058	26785066	MA0604.1	7.09e-05	+	1029	Upstream	HVAEP1_G000761
chr-1	26785316	26785330	MA1607.1	2.65e-05	+	768	Upstream	HVAEP1_G000761
chr-1	26785318	26785329	MA0458.1	7.19e-05	-	768	Upstream	HVAEP1_G000761
chr-1	26785319	26785330	MA0047.3	1.58e-05	+	767	Upstream	HVAEP1_G000761
chr-1	26785319	26785330	MA0481.3	3.04e-05	+	767	Upstream	HVAEP1_G000761
chr-1	26785319	26785330	MA1103.2	5.19e-05	+	767	Upstream	HVAEP1_G000761
chr-1	26785319	26785330	MA1606.1	3.56e-05	+	767	Upstream	HVAEP1_G000761
chr-1	26785319	26785330	MA1683.1	2.62e-05	+	767	Upstream	HVAEP1_G000761
chr-1	26785319	26785331	MA1446.1	9.55e-05	+	766	Upstream	HVAEP1_G000761
chr-1	26785369	26785384	MA1487.1	5.15e-06	+	715	Upstream	HVAEP1_G000761
chr-1	26785370	26785383	MA0847.2	4.41e-05	+	715	Upstream	HVAEP1_G000761
chr-1	26785758	26785772	MA1544.1	7.39e-05	+	326	Upstream	HVAEP1_G000761
chr-1	26785759	26785772	MA1545.1	7.26e-05	+	326	Upstream	HVAEP1_G000761
chr-1	26785761	26785770	MA0126.1	4.25e-05	-	326	Upstream	HVAEP1_G000761
chr-1	26785761	26785770	MA0239.1	4.25e-05	-	326	Upstream	HVAEP1_G000761
chr-1	26785841	26785852	MA0506.1	1.55e-05	+	245	Upstream	HVAEP1_G000761
chr-1	26785866	26785880	MA0602.1	3.69e-05	+	218	Upstream	HVAEP1_G000761
chr-1	26785870	26785887	MA1114.1	3.87e-07	+	213	Upstream	HVAEP1_G000761
chr-1	26785871	26785883	MA0070.1	4.54e-05	-	214	Upstream	HVAEP1_G000761
chr-1	26785871	26785886	MA0782.2	3.23e-07	+	213	Upstream	HVAEP1_G000761
chr-1	26785874	26785886	MA0918.1	1.62e-05	-	211	Upstream	HVAEP1_G000761
chr-1	26785874	26785887	MA0513.1	4.69e-05	-	211	Upstream	HVAEP1_G000761
chr-1	26785876	26785883	MA0498.2	8.06e-05	+	212	Upstream	HVAEP1_G000761
chr-1	26785876	26785884	MA0774.1	6.33e-06	+	211	Upstream	HVAEP1_G000761
chr-1	26785876	26785884	MA0775.1	1.75e-05	+	211	Upstream	HVAEP1_G000761
chr-1	26785876	26785890	MA1629.1	9.04e-05	+	208	Upstream	HVAEP1_G000761
chr-1	26785877	26785889	MA0783.1	5.12e-05	+	208	Upstream	HVAEP1_G000761
chr-1	26785877	26785889	MA0796.1	5.83e-05	+	208	Upstream	HVAEP1_G000761
chr-1	26785877	26785889	MA0797.1	7.98e-05	+	208	Upstream	HVAEP1_G000761
chr-1	26785877	26785889	MA1571.1	6.42e-05	+	208	Upstream	HVAEP1_G000761
chr-1	26785877	26785889	MA1572.1	8.47e-05	+	208	Upstream	HVAEP1_G000761
chr-1	26785878	26785888	MA0763.1	9.09e-05	-	208	Upstream	HVAEP1_G000761
chr-1	26785878	26785888	MA1635.1	6.55e-05	+	208	Upstream	HVAEP1_G000761
chr-1	26785878	26785889	MA1628.1	1.47e-05	+	208	Upstream	HVAEP1_G000761
chr-1	26785878	26785891	MA0471.2	5.78e-05	+	207	Upstream	HVAEP1_G000761
chr-1	26785880	26785891	MA0144.2	8.4e-05	+	206	Upstream	HVAEP1_G000761
chr-1	26785880	26785891	MA1122.1	3.32e-05	+	206	Upstream	HVAEP1_G000761
chr-1	26785880	26785892	MA0641.1	5.65e-05	+	205	Upstream	HVAEP1_G000761
chr-1	26785880	26785892	MA1483.1	6.19e-05	+	205	Upstream	HVAEP1_G000761
chr-1	26785881	26785891	MA1484.1	5.07e-05	+	205	Upstream	HVAEP1_G000761
chr-1	26785881	26785892	MA0136.2	4.08e-05	+	205	Upstream	HVAEP1_G000761
chr-1	26785881	26785892	MA0762.1	3.45e-05	+	205	Upstream	HVAEP1_G000761
chr-1	26785881	26785894	MA0750.2	7.33e-05	+	204	Upstream	HVAEP1_G000761
chr-1	26785882	26785892	MA0028.2	6.01e-05	+	204	Upstream	HVAEP1_G000761
chr-1	26785882	26785892	MA0098.3	3.48e-05	+	204	Upstream	HVAEP1_G000761
chr-1	26785882	26785892	MA0156.2	4.24e-05	+	204	Upstream	HVAEP1_G000761
chr-1	26785882	26785892	MA0474.2	4.97e-05	+	204	Upstream	HVAEP1_G000761
chr-1	26785882	26785892	MA0475.2	3.68e-05	+	204	Upstream	HVAEP1_G000761
chr-1	26785882	26785892	MA0624.1	1.77e-05	-	204	Upstream	HVAEP1_G000761
chr-1	26785882	26785892	MA0625.1	2.64e-05	-	204	Upstream	HVAEP1_G000761
chr-1	26785882	26785892	MA0759.1	3.92e-05	+	204	Upstream	HVAEP1_G000761
chr-1	26785882	26785892	MA0760.1	4.39e-05	+	204	Upstream	HVAEP1_G000761
chr-1	26785882	26785893	MA0076.2	1.2e-05	-	204	Upstream	HVAEP1_G000761
chr-1	26785883	26785890	MA0026.1	2.43e-05	+	205	Upstream	HVAEP1_G000761
chr-1	26785883	26785891	MA0916.1	5.55e-05	+	204	Upstream	HVAEP1_G000761
chr-1	26785906	26785921	MA1616.1	1.04e-05	+	178	Upstream	HVAEP1_G000761
chr-1	26785930	26785945	MA0534.1	2.34e-05	+	154	Upstream	HVAEP1_G000761
chr-1	26785930	26785945	MA1146.1	2.77e-05	-	154	Upstream	HVAEP1_G000761
chr-1	26785930	26785945	MA1147.1	4.46e-05	+	154	Upstream	HVAEP1_G000761
chr-1	26785931	26785948	MA1541.1	3.14e-05	-	152	Upstream	HVAEP1_G000761
chr-1	26785935	26785953	MA0729.1	9.99e-05	-	147	Upstream	HVAEP1_G000761
chr-1	26785938	26785946	MA0693.2	3.15e-05	-	149	Upstream	HVAEP1_G000761
chr-1	27032891	27032906	MA0517.1	1.65e-05	+	1058	PeakInsideFeature	HVAEP1_G000755
chr-1	27032950	27032961	MA0161.2	9.63e-06	+	1001	PeakInsideFeature	HVAEP1_G000755
chr-1	27032951	27032960	MA0738.1	3.13e-05	-	1001	PeakInsideFeature	HVAEP1_G000755
chr-1	27032951	27032960	MA0739.1	1.67e-05	-	1001	PeakInsideFeature	HVAEP1_G000755
chr-1	27032951	27032961	MA0670.1	3.36e-05	-	1000	PeakInsideFeature	HVAEP1_G000755
chr-1	27033017	27033032	MA0538.1	2.53e-06	-	932	PeakInsideFeature	HVAEP1_G000755
chr-1	27033019	27033034	MA1155.1	8.25e-05	+	930	PeakInsideFeature	HVAEP1_G000755
chr-1	27033132	27033142	MA0624.1	1.6e-05	+	819	PeakInsideFeature	HVAEP1_G000755
chr-1	27089207	27089213	MA0130.1	4.85e-05	+	1227	PeakInsideFeature	HVAEP1_G000770
chr-1	27089858	27089866	MA0611.1	4.56e-05	-	575	PeakInsideFeature	HVAEP1_G000770
chr-1	27089988	27089999	MA0601.1	5.9e-05	-	444	PeakInsideFeature	HVAEP1_G000770
chr-1	27090356	27090365	MA0724.1	3.78e-05	+	77	PeakInsideFeature	HVAEP1_G000770
chr-1	27090356	27090366	MA0635.1	1.87e-05	-	76	PeakInsideFeature	HVAEP1_G000770
chr-1	27090356	27090366	MA0642.1	3.46e-05	+	76	PeakInsideFeature	HVAEP1_G000770
chr-1	27090356	27090366	MA0644.1	7.68e-05	+	76	PeakInsideFeature	HVAEP1_G000770
chr-1	27090356	27090366	MA0648.1	6.54e-06	-	76	PeakInsideFeature	HVAEP1_G000770
chr-1	27090356	27090366	MA0662.1	3.57e-05	+	76	PeakInsideFeature	HVAEP1_G000770
chr-1	27090356	27090366	MA0699.1	6.01e-05	+	76	PeakInsideFeature	HVAEP1_G000770
chr-1	27090356	27090366	MA0887.1	2.53e-06	+	76	PeakInsideFeature	HVAEP1_G000770
chr-1	27090356	27090366	MA0888.1	3.16e-06	+	76	PeakInsideFeature	HVAEP1_G000770
chr-1	27090356	27090366	MA0890.1	7.61e-05	+	76	PeakInsideFeature	HVAEP1_G000770
chr-1	27090356	27090366	MA0891.1	8.27e-06	-	76	PeakInsideFeature	HVAEP1_G000770
chr-1	27090356	27090366	MA0903.1	6.01e-05	+	76	PeakInsideFeature	HVAEP1_G000770
chr-1	27090356	27090366	MA1497.1	2.17e-05	+	76	PeakInsideFeature	HVAEP1_G000770
chr-1	27090356	27090367	MA1608.1	9.41e-05	+	76	PeakInsideFeature	HVAEP1_G000770
chr-1	27090357	27090365	MA0711.1	8.98e-05	-	76	PeakInsideFeature	HVAEP1_G000770
chr-1	27090357	27090365	MA0875.1	1.9e-05	+	76	PeakInsideFeature	HVAEP1_G000770
chr-1	27090357	27090365	MA0876.1	7.72e-05	+	76	PeakInsideFeature	HVAEP1_G000770
chr-1	27090357	27090365	MA0877.2	6.32e-05	-	76	PeakInsideFeature	HVAEP1_G000770
chr-1	27090357	27090367	MA1480.1	4.06e-05	-	75	PeakInsideFeature	HVAEP1_G000770
chr-1	27090522	27090532	MA0820.1	9.98e-05	+	90	Upstream	HVAEP1_G000770
chr-1	27090522	27090533	MA1628.1	1.62e-05	+	90	Upstream	HVAEP1_G000770
chr-1	27142106	27142120	MA0093.3	1.93e-06	+	66	Upstream	HVAEP1_G000771
chr-1	27142106	27142120	MA0526.3	2.53e-06	+	66	Upstream	HVAEP1_G000771
chr-1	27142108	27142118	MA0664.1	6.31e-05	-	66	Upstream	HVAEP1_G000771
chr-1	27142110	27142118	MA0831.2	7.35e-05	+	65	Upstream	HVAEP1_G000771
chr-1	27142113	27142126	MA0884.1	3.11e-05	-	60	Upstream	HVAEP1_G000771
chr-1	27142114	27142125	MA0468.1	8.32e-06	-	60	Upstream	HVAEP1_G000771
chr-1	27142119	27142132	MA1124.1	3.91e-05	-	54	Upstream	HVAEP1_G000771
chr-1	27142192	27142204	MA0131.2	1.24e-06	+	19	PeakInsideFeature	HVAEP1_G000771
chr-1	27142310	27142322	MA0918.1	5.3e-06	-	137	PeakInsideFeature	HVAEP1_G000771
chr-1	27142312	27142320	MA0774.1	1.75e-05	+	137	PeakInsideFeature	HVAEP1_G000771
chr-1	27142312	27142320	MA0775.1	2.43e-06	+	137	PeakInsideFeature	HVAEP1_G000771
chr-1	27391212	27391223	MA0216.2	7.38e-05	-	495	Upstream	HVAEP1_G000782
chr-1	27391275	27391287	MA0918.1	3.89e-05	-	431	Upstream	HVAEP1_G000782
chr-1	27391275	27391288	MA0513.1	3.99e-05	-	431	Upstream	HVAEP1_G000782
chr-1	27391277	27391284	MA0498.2	3.51e-05	+	432	Upstream	HVAEP1_G000782
chr-1	27391277	27391285	MA0774.1	1.51e-05	+	431	Upstream	HVAEP1_G000782
chr-1	27391277	27391285	MA0775.1	4.87e-06	+	431	Upstream	HVAEP1_G000782
chr-1	27391277	27391291	MA1629.1	9.8e-05	+	428	Upstream	HVAEP1_G000782
chr-1	27391277	27391291	MA1700.1	6.09e-06	+	428	Upstream	HVAEP1_G000782
chr-1	27391279	27391291	MA1102.2	7.7e-05	+	427	Upstream	HVAEP1_G000782
chr-1	27391310	27391316	MA0260.1	4.85e-05	-	399	Upstream	HVAEP1_G000782
chr-1	27391310	27391320	MA0764.2	2.64e-05	-	397	Upstream	HVAEP1_G000782
chr-1	27391703	27391714	MA0012.1	5.39e-05	-	4	OverlapStart	HVAEP1_G000782
chr-1	27391704	27391718	MA0010.1	1.49e-07	-	1	OverlapStart	HVAEP1_G000782
chr-1	27391847	27391860	MA0025.2	2.32e-05	-	141	PeakInsideFeature	HVAEP1_G000782
chr-1	27391847	27391861	MA0043.3	1.37e-05	-	142	PeakInsideFeature	HVAEP1_G000782
chr-1	27391848	27391860	MA1702.1	9.49e-06	-	142	PeakInsideFeature	HVAEP1_G000782
chr-1	27391848	27391863	MA0142.1	6.34e-06	-	143	PeakInsideFeature	HVAEP1_G000782
chr-1	27391868	27391883	MA0532.1	3.04e-05	+	163	PeakInsideFeature	HVAEP1_G000782
chr-1	27391870	27391885	MA1625.1	3.65e-05	+	165	PeakInsideFeature	HVAEP1_G000782
chr-1	27391871	27391882	MA0519.1	2.06e-05	+	164	PeakInsideFeature	HVAEP1_G000782
chr-1	27391872	27391883	MA0137.3	3.81e-05	-	165	PeakInsideFeature	HVAEP1_G000782
chr-1	27391872	27391883	MA0144.2	1.84e-05	-	165	PeakInsideFeature	HVAEP1_G000782
chr-1	27391872	27391884	MA1624.1	5.87e-06	+	166	PeakInsideFeature	HVAEP1_G000782
chr-1	27391872	27391887	MA0532.1	4.03e-05	-	167	PeakInsideFeature	HVAEP1_G000782
chr-1	27391873	27391884	MA0519.1	8.65e-05	-	166	PeakInsideFeature	HVAEP1_G000782
chr-1	27481265	27481273	MA0222.1	4.56e-05	-	973	Upstream	HVAEP1_G000784
chr-1	27511783	27511800	MA1541.1	6.7e-05	+	9986	Upstream	HVAEP1_G000785
chr-1	27511784	27511803	MA0494.1	9.19e-07	-	9984	Upstream	HVAEP1_G000785
chr-1	27511785	27511804	MA1576.1	6.04e-06	-	9983	Upstream	HVAEP1_G000785
chr-1	27511786	27511803	MA0860.1	1.89e-06	+	9983	Upstream	HVAEP1_G000785
chr-1	27511787	27511806	MA0139.1	2.97e-05	+	9981	Upstream	HVAEP1_G000785
chr-1	27511789	27511799	MA0100.3	1.34e-05	-	9983	Upstream	HVAEP1_G000785
chr-1	27511792	27511805	MA1615.1	7.73e-07	+	9979	Upstream	HVAEP1_G000785
chr-1	27511795	27511811	MA0857.1	5.54e-05	+	9974	Upstream	HVAEP1_G000785
chr-1	27511796	27511811	MA0728.1	4.79e-05	+	9974	Upstream	HVAEP1_G000785
chr-1	27511796	27511812	MA0859.1	6.12e-05	+	9973	Upstream	HVAEP1_G000785
chr-1	27511828	27511843	MA1520.1	2.64e-06	-	9942	Upstream	HVAEP1_G000785
chr-1	27511828	27511843	MA1521.1	3.48e-06	-	9942	Upstream	HVAEP1_G000785
chr-1	27511833	27511847	MA1629.1	4.81e-06	+	9937	Upstream	HVAEP1_G000785
chr-1	27511833	27511848	MA0659.2	1.67e-05	+	9937	Upstream	HVAEP1_G000785
chr-1	27511833	27511849	MA0495.3	2.93e-05	+	9936	Upstream	HVAEP1_G000785
chr-1	27511834	27511846	MA0117.2	4.9e-05	-	9937	Upstream	HVAEP1_G000785
chr-1	27511834	27511849	MA0697.1	2.27e-05	-	9936	Upstream	HVAEP1_G000785
chr-1	27511834	27511849	MA0751.1	1.89e-05	-	9936	Upstream	HVAEP1_G000785
chr-1	27511834	27511850	MA1584.1	2.04e-05	-	9935	Upstream	HVAEP1_G000785
chr-1	27511835	27511846	MA1628.1	4.48e-05	+	9937	Upstream	HVAEP1_G000785
chr-1	27511835	27511849	MA0696.1	8.7e-05	-	9935	Upstream	HVAEP1_G000785
chr-1	27511837	27511849	MA0456.1	6.2e-05	-	9934	Upstream	HVAEP1_G000785
chr-1	27511838	27511849	MA1628.1	1.47e-05	+	9934	Upstream	HVAEP1_G000785
chr-1	27511839	27511849	MA1585.1	6.18e-06	+	9933	Upstream	HVAEP1_G000785
chr-1	27511852	27511865	MA0262.1	1.04e-05	+	9919	Upstream	HVAEP1_G000785
chr-1	27511923	27511933	MA0514.1	2.13e-05	-	9849	Upstream	HVAEP1_G000785
chr-1	27511923	27511934	MA0442.2	5.73e-07	+	9849	Upstream	HVAEP1_G000785
chr-1	27511924	27511934	MA0867.2	7.87e-06	+	9848	Upstream	HVAEP1_G000785
chr-1	27511965	27511977	MA1508.1	2.14e-05	+	9806	Upstream	HVAEP1_G000785
chr-1	27512022	27512036	MA1607.1	4.08e-05	-	9748	Upstream	HVAEP1_G000785
chr-1	27512023	27512037	MA0509.2	3.72e-05	+	9747	Upstream	HVAEP1_G000785
chr-1	27512023	27512037	MA0798.2	2.78e-05	+	9747	Upstream	HVAEP1_G000785
chr-1	27512024	27512040	MA0510.2	5.68e-06	-	9745	Upstream	HVAEP1_G000785
chr-1	27512024	27512040	MA0600.2	6.6e-06	-	9745	Upstream	HVAEP1_G000785
chr-1	27512024	27512040	MA0799.1	9.6e-06	-	9745	Upstream	HVAEP1_G000785
chr-1	27512027	27512041	MA0509.2	2.5e-05	-	9743	Upstream	HVAEP1_G000785
chr-1	27512027	27512041	MA0798.2	1.94e-05	-	9743	Upstream	HVAEP1_G000785
chr-1	27512796	27512806	MA0667.1	7.46e-05	+	8976	Upstream	HVAEP1_G000785
chr-1	27512861	27512869	MA0693.2	3.15e-05	+	8912	Upstream	HVAEP1_G000785
chr-1	27512861	27512870	MA1534.1	7.09e-05	-	8912	Upstream	HVAEP1_G000785
chr-1	27512862	27512874	MA0014.3	1.94e-05	-	8909	Upstream	HVAEP1_G000785
chr-1	27520401	27520412	MA1122.1	4.4e-05	-	1371	Upstream	HVAEP1_G000785
chr-1	27520402	27520414	MA0865.1	3.65e-05	+	1369	Upstream	HVAEP1_G000785
chr-1	27520402	27520417	MA0541.1	9.19e-05	-	1368	Upstream	HVAEP1_G000785
chr-1	27520403	27520418	MA0527.1	3.61e-05	+	1367	Upstream	HVAEP1_G000785
chr-1	27520404	27520414	MA0632.2	5.19e-06	+	1368	Upstream	HVAEP1_G000785
chr-1	27520404	27520416	MA1650.1	6.73e-05	+	1367	Upstream	HVAEP1_G000785
chr-1	27520440	27520454	MA0863.1	1.39e-05	+	1330	Upstream	HVAEP1_G000785
chr-1	27520441	27520452	MA1517.1	8.86e-05	+	1331	Upstream	HVAEP1_G000785
chr-1	27520441	27520452	MA1517.1	8.86e-05	+	1331	Upstream	HVAEP1_G000785
chr-1	27520441	27520453	MA0821.1	6.17e-05	+	1330	Upstream	HVAEP1_G000785
chr-1	27520441	27520456	MA0742.1	9.96e-05	+	1329	Upstream	HVAEP1_G000785
chr-1	27520441	27520458	MA0685.1	3.17e-05	+	1328	Upstream	HVAEP1_G000785
chr-1	27520442	27520452	MA0616.2	5.35e-05	-	1330	Upstream	HVAEP1_G000785
chr-1	27520442	27520452	MA0616.2	5.35e-05	-	1330	Upstream	HVAEP1_G000785
chr-1	27520442	27520452	MA1099.2	4.92e-05	-	1330	Upstream	HVAEP1_G000785
chr-1	27520442	27520452	MA1493.1	3.51e-05	-	1330	Upstream	HVAEP1_G000785
chr-1	27520443	27520454	MA1515.1	5.31e-05	+	1329	Upstream	HVAEP1_G000785
chr-1	27520443	27520454	MA1515.1	5.31e-05	+	1329	Upstream	HVAEP1_G000785
chr-1	27520443	27520454	MA1517.1	5.01e-05	+	1329	Upstream	HVAEP1_G000785
chr-1	27520443	27520454	MA1517.1	5.01e-05	+	1329	Upstream	HVAEP1_G000785
chr-1	27520443	27520456	MA0746.2	2.87e-05	+	1328	Upstream	HVAEP1_G000785
chr-1	27520443	27520457	MA0740.1	4.47e-05	+	1327	Upstream	HVAEP1_G000785
chr-1	27520443	27520457	MA0740.1	4.47e-05	+	1327	Upstream	HVAEP1_G000785
chr-1	27520444	27520454	MA0616.2	8.75e-05	-	1328	Upstream	HVAEP1_G000785
chr-1	27520444	27520454	MA0616.2	8.75e-05	-	1328	Upstream	HVAEP1_G000785
chr-1	27520444	27520454	MA0649.1	5.16e-05	-	1328	Upstream	HVAEP1_G000785
chr-1	27520444	27520454	MA0823.1	9.91e-05	+	1328	Upstream	HVAEP1_G000785
chr-1	27520444	27520454	MA1566.1	2.2e-05	-	1328	Upstream	HVAEP1_G000785
chr-1	27520444	27520454	MA1566.1	2.2e-05	-	1328	Upstream	HVAEP1_G000785
chr-1	27520444	27520455	MA0741.1	3.33e-05	+	1328	Upstream	HVAEP1_G000785
chr-1	27520444	27520455	MA0741.1	3.33e-05	+	1328	Upstream	HVAEP1_G000785
chr-1	27520444	27520455	MA1511.1	3.16e-05	+	1328	Upstream	HVAEP1_G000785
chr-1	27520444	27520455	MA1512.1	1.45e-05	+	1328	Upstream	HVAEP1_G000785
chr-1	27520444	27520456	MA0747.1	2.38e-05	+	1327	Upstream	HVAEP1_G000785
chr-1	27520444	27520456	MA0747.1	2.38e-05	+	1327	Upstream	HVAEP1_G000785
chr-1	27520444	27520456	MA1564.1	3e-05	+	1327	Upstream	HVAEP1_G000785
chr-1	27520445	27520454	MA0450.1	4.16e-06	-	1328	Upstream	HVAEP1_G000785
chr-1	27520446	27520452	MA0006.1	8.59e-05	-	1328	Upstream	HVAEP1_G000785
chr-1	27520449	27520459	MA0793.1	1.45e-05	+	1323	Upstream	HVAEP1_G000785
chr-1	27520449	27520459	MA1549.1	1.79e-05	-	1323	Upstream	HVAEP1_G000785
chr-1	27520450	27520460	MA0892.1	8.89e-05	+	1322	Upstream	HVAEP1_G000785
chr-1	27520451	27520459	MA0674.1	8.55e-05	+	1322	Upstream	HVAEP1_G000785
chr-1	27520488	27520502	MA0863.1	1.82e-05	+	1282	Upstream	HVAEP1_G000785
chr-1	27520489	27520501	MA0131.2	8.93e-05	-	1282	Upstream	HVAEP1_G000785
chr-1	27520491	27520501	MA0632.2	5.8e-05	+	1281	Upstream	HVAEP1_G000785
chr-1	27520500	27520512	MA1151.1	2.95e-05	+	1271	Upstream	HVAEP1_G000785
chr-1	27520500	27520516	MA0609.2	4.11e-05	-	1269	Upstream	HVAEP1_G000785
chr-1	27520501	27520513	MA0684.2	3.23e-05	-	1270	Upstream	HVAEP1_G000785
chr-1	27520501	27520514	MA0018.4	2.36e-05	+	1270	Upstream	HVAEP1_G000785
chr-1	27520501	27520514	MA1632.1	1.04e-05	+	1270	Upstream	HVAEP1_G000785
chr-1	27520501	27520516	MA1145.1	2.14e-05	+	1269	Upstream	HVAEP1_G000785
chr-1	27520502	27520512	MA0071.1	3.03e-05	+	1270	Upstream	HVAEP1_G000785
chr-1	27520502	27520513	MA1150.1	1.4e-05	+	1270	Upstream	HVAEP1_G000785
chr-1	27520503	27520514	MA1127.1	6.22e-05	-	1269	Upstream	HVAEP1_G000785
chr-1	27520503	27520514	MA1131.1	6.13e-05	-	1269	Upstream	HVAEP1_G000785
chr-1	27520503	27520516	MA0017.2	3.87e-05	+	1268	Upstream	HVAEP1_G000785
chr-1	27520504	27520513	MA1535.1	4.74e-05	+	1269	Upstream	HVAEP1_G000785
chr-1	27520504	27520514	MA1438.1	8.94e-05	-	1268	Upstream	HVAEP1_G000785
chr-1	27520504	27520515	MA1704.1	2.33e-05	-	1268	Upstream	HVAEP1_G000785
chr-1	27520505	27520513	MA1536.1	4.05e-05	+	1268	Upstream	HVAEP1_G000785
chr-1	27520505	27520515	MA0016.1	1.89e-05	+	1267	Upstream	HVAEP1_G000785
chr-1	27520505	27520516	MA1110.1	2.17e-05	-	1267	Upstream	HVAEP1_G000785
chr-1	27520505	27520520	MA1537.1	9.96e-05	+	1265	Upstream	HVAEP1_G000785
chr-1	27520505	27520520	MA1538.1	4.95e-05	-	1265	Upstream	HVAEP1_G000785
chr-1	27520505	27520523	MA1149.1	7.63e-05	+	1263	Upstream	HVAEP1_G000785
chr-1	27520507	27520518	MA0536.1	3.44e-05	-	1265	Upstream	HVAEP1_G000785
chr-1	27520510	27520521	MA0536.1	8.88e-05	+	1262	Upstream	HVAEP1_G000785
chr-1	27520513	27520525	MA0684.2	1.17e-05	-	1258	Upstream	HVAEP1_G000785
chr-1	27520553	27520564	MA0445.1	3.1e-05	+	1219	Upstream	HVAEP1_G000785
chr-1	27520566	27520575	MA0460.1	9.66e-05	-	1207	Upstream	HVAEP1_G000785
chr-1	27520587	27520603	MA1546.1	3.04e-05	+	1182	Upstream	HVAEP1_G000785
chr-1	27520588	27520594	MA0130.1	4.85e-05	+	1186	Upstream	HVAEP1_G000785
chr-1	27520603	27520617	MA0237.2	8.6e-06	-	1167	Upstream	HVAEP1_G000785
chr-1	27520614	27520628	MA0518.1	1.27e-05	-	1156	Upstream	HVAEP1_G000785
chr-1	27520617	27520628	MA0137.3	4.03e-05	-	1155	Upstream	HVAEP1_G000785
chr-1	27520732	27520743	MA0650.2	8.86e-05	-	1040	Upstream	HVAEP1_G000785
chr-1	27520740	27520750	MA0661.1	3.26e-05	+	1032	Upstream	HVAEP1_G000785
chr-1	27520740	27520750	MA0706.1	1.27e-05	+	1032	Upstream	HVAEP1_G000785
chr-1	27520740	27520750	MA0707.1	9.7e-05	+	1032	Upstream	HVAEP1_G000785
chr-1	27520740	27520750	MA0879.1	8.16e-05	-	1032	Upstream	HVAEP1_G000785
chr-1	27520740	27520750	MA0887.1	4.67e-05	+	1032	Upstream	HVAEP1_G000785
chr-1	27520740	27520750	MA0888.1	7.67e-05	+	1032	Upstream	HVAEP1_G000785
chr-1	27520740	27520750	MA1497.1	5.26e-05	+	1032	Upstream	HVAEP1_G000785
chr-1	27520740	27520750	MA1501.1	5.71e-05	+	1032	Upstream	HVAEP1_G000785
chr-1	27521362	27521373	MA0458.1	6.91e-05	-	410	Upstream	HVAEP1_G000785
chr-1	27521365	27521373	MA1440.1	8.55e-05	+	408	Upstream	HVAEP1_G000785
chr-1	27521390	27521400	MA0766.2	8.65e-05	+	382	Upstream	HVAEP1_G000785
chr-1	27521390	27521403	MA1545.1	7.14e-05	-	381	Upstream	HVAEP1_G000785
chr-1	27521390	27521404	MA1544.1	4.5e-05	-	380	Upstream	HVAEP1_G000785
chr-1	27521391	27521399	MA0037.3	2.91e-05	+	382	Upstream	HVAEP1_G000785
chr-1	27521540	27521561	MA1418.1	3.15e-05	+	227	Upstream	HVAEP1_G000785
chr-1	27521545	27521556	MA0060.3	1.27e-05	+	227	Upstream	HVAEP1_G000785
chr-1	27521545	27521556	MA1644.1	1.99e-05	+	227	Upstream	HVAEP1_G000785
chr-1	27521547	27521555	MA0705.1	2.52e-05	+	226	Upstream	HVAEP1_G000785
chr-1	27521550	27521560	MA0475.2	9.15e-05	+	222	Upstream	HVAEP1_G000785
chr-1	27521550	27521560	MA0760.1	2.61e-05	+	222	Upstream	HVAEP1_G000785
chr-1	27521550	27521560	MA0763.1	6.76e-05	+	222	Upstream	HVAEP1_G000785
chr-1	27521562	27521578	MA0495.3	3.08e-05	-	207	Upstream	HVAEP1_G000785
chr-1	27521563	27521578	MA0659.2	8.72e-05	-	207	Upstream	HVAEP1_G000785
chr-1	27521565	27521578	MA0488.1	6.33e-05	+	206	Upstream	HVAEP1_G000785
chr-1	27521566	27521579	MA0018.4	2.97e-05	+	205	Upstream	HVAEP1_G000785
chr-1	27521571	27521579	MA0775.1	8.35e-05	+	202	Upstream	HVAEP1_G000785
chr-1	27521572	27521584	MA0821.1	6.1e-06	+	199	Upstream	HVAEP1_G000785
chr-1	27521572	27521584	MA0822.1	2.34e-06	-	199	Upstream	HVAEP1_G000785
chr-1	27521572	27521584	MA1474.1	3.85e-05	+	199	Upstream	HVAEP1_G000785
chr-1	27521573	27521583	MA0464.2	9.09e-05	+	199	Upstream	HVAEP1_G000785
chr-1	27521573	27521583	MA0616.2	1.37e-05	-	199	Upstream	HVAEP1_G000785
chr-1	27521573	27521583	MA0649.1	8.38e-06	-	199	Upstream	HVAEP1_G000785
chr-1	27521573	27521583	MA0819.1	7.54e-05	+	199	Upstream	HVAEP1_G000785
chr-1	27521573	27521583	MA0823.1	2.49e-05	+	199	Upstream	HVAEP1_G000785
chr-1	27521573	27521583	MA0825.1	5.1e-05	+	199	Upstream	HVAEP1_G000785
chr-1	27521573	27521583	MA1099.2	2.87e-05	-	199	Upstream	HVAEP1_G000785
chr-1	27521573	27521583	MA1464.1	3.96e-05	+	199	Upstream	HVAEP1_G000785
chr-1	27521573	27521583	MA1493.1	2.42e-06	-	199	Upstream	HVAEP1_G000785
chr-1	27521576	27521586	MA0624.1	7.87e-05	+	196	Upstream	HVAEP1_G000785
chr-1	27521576	27521586	MA1525.1	4.15e-05	-	196	Upstream	HVAEP1_G000785
chr-1	27552699	27552714	MA1579.1	6.48e-05	+	90	Upstream	HVAEP1_G000787
chr-1	27552700	27552710	MA0092.1	6.32e-05	-	91	Upstream	HVAEP1_G000787
chr-1	27552700	27552713	MA1123.2	7.62e-05	+	90	Upstream	HVAEP1_G000787
chr-1	27552700	27552715	MA1616.1	8.2e-05	-	89	Upstream	HVAEP1_G000787
chr-1	27552704	27552719	MA0527.1	3.93e-05	-	85	Upstream	HVAEP1_G000787
chr-1	27552705	27552721	MA1584.1	8.21e-05	+	83	Upstream	HVAEP1_G000787
chr-1	27552706	27552718	MA0456.1	6.74e-05	+	84	Upstream	HVAEP1_G000787
chr-1	27552706	27552720	MA0696.1	1.94e-05	+	83	Upstream	HVAEP1_G000787
chr-1	27552706	27552720	MA1700.1	4.24e-05	-	83	Upstream	HVAEP1_G000787
chr-1	27552706	27552721	MA0541.1	2.51e-05	-	83	Upstream	HVAEP1_G000787
chr-1	27552706	27552721	MA0697.1	4.95e-05	+	83	Upstream	HVAEP1_G000787
chr-1	27552706	27552722	MA0864.2	8.92e-05	+	82	Upstream	HVAEP1_G000787
chr-1	27552707	27552722	MA0527.1	7.96e-06	+	82	Upstream	HVAEP1_G000787
chr-1	27552708	27552718	MA0632.2	1.33e-05	+	83	Upstream	HVAEP1_G000787
chr-1	27552708	27552722	MA1629.1	3.99e-05	-	81	Upstream	HVAEP1_G000787
chr-1	27552709	27552720	MA1628.1	1.65e-05	-	82	Upstream	HVAEP1_G000787
chr-1	27552712	27552720	MA1563.1	6.85e-05	-	80	Upstream	HVAEP1_G000787
chr-1	27552713	27552724	MA0002.2	6.98e-05	+	78	Upstream	HVAEP1_G000787
chr-1	27552754	27552766	MA1593.1	6.49e-05	-	36	Upstream	HVAEP1_G000787
chr-1	27552755	27552765	MA0816.1	7.23e-05	+	36	Upstream	HVAEP1_G000787
chr-1	27552755	27552765	MA1467.1	4.09e-05	+	36	Upstream	HVAEP1_G000787
chr-1	27552755	27552765	MA1472.1	8.81e-05	+	36	Upstream	HVAEP1_G000787
chr-1	27602527	27602542	MA1579.1	6.48e-05	+	18	PeakInsideFeature	HVAEP1_G000789
chr-1	27602528	27602538	MA0092.1	6.32e-05	-	19	PeakInsideFeature	HVAEP1_G000789
chr-1	27602528	27602541	MA1123.2	7.62e-05	+	18	PeakInsideFeature	HVAEP1_G000789
chr-1	27602528	27602543	MA1616.1	8.2e-05	-	17	PeakInsideFeature	HVAEP1_G000789
chr-1	27602532	27602547	MA0527.1	3.93e-05	-	13	PeakInsideFeature	HVAEP1_G000789
chr-1	27602533	27602549	MA1584.1	8.21e-05	+	11	PeakInsideFeature	HVAEP1_G000789
chr-1	27602534	27602546	MA0456.1	6.74e-05	+	12	PeakInsideFeature	HVAEP1_G000789
chr-1	27602534	27602548	MA0696.1	1.94e-05	+	11	PeakInsideFeature	HVAEP1_G000789
chr-1	27602534	27602548	MA1700.1	4.24e-05	-	11	PeakInsideFeature	HVAEP1_G000789
chr-1	27602534	27602549	MA0541.1	2.51e-05	-	11	PeakInsideFeature	HVAEP1_G000789
chr-1	27602534	27602549	MA0697.1	4.95e-05	+	11	PeakInsideFeature	HVAEP1_G000789
chr-1	27602534	27602550	MA0864.2	8.92e-05	+	10	PeakInsideFeature	HVAEP1_G000789
chr-1	27602535	27602550	MA0527.1	7.96e-06	+	10	PeakInsideFeature	HVAEP1_G000789
chr-1	27602536	27602546	MA0632.2	1.33e-05	+	11	PeakInsideFeature	HVAEP1_G000789
chr-1	27602536	27602550	MA1629.1	3.99e-05	-	9	PeakInsideFeature	HVAEP1_G000789
chr-1	27602537	27602548	MA1628.1	1.65e-05	-	10	PeakInsideFeature	HVAEP1_G000789
chr-1	27602540	27602548	MA1563.1	6.85e-05	-	8	PeakInsideFeature	HVAEP1_G000789
chr-1	27661391	27661405	MA0062.3	8.61e-06	+	234	Upstream	HVAEP1_G000795
chr-1	27661391	27661405	MA0473.3	3.39e-06	-	234	Upstream	HVAEP1_G000795
chr-1	27661391	27661405	MA0761.2	7.41e-06	-	234	Upstream	HVAEP1_G000795
chr-1	27661391	27661406	MA0598.3	3.88e-06	+	234	Upstream	HVAEP1_G000795
chr-1	27661393	27661403	MA0098.3	4.58e-05	-	234	Upstream	HVAEP1_G000795
chr-1	27661393	27661403	MA0156.2	4.49e-05	-	234	Upstream	HVAEP1_G000795
chr-1	27661393	27661403	MA0474.2	3.35e-05	-	234	Upstream	HVAEP1_G000795
chr-1	27661393	27661403	MA0475.2	4.36e-05	-	234	Upstream	HVAEP1_G000795
chr-1	27661393	27661403	MA0760.1	9.8e-05	-	234	Upstream	HVAEP1_G000795
chr-1	27661393	27661403	MA0763.1	8e-05	-	234	Upstream	HVAEP1_G000795
chr-1	27661441	27661458	MA0851.1	2.37e-06	-	183	Upstream	HVAEP1_G000795
chr-1	27661443	27661455	MA0041.1	1.87e-05	+	183	Upstream	HVAEP1_G000795
chr-1	27661449	27661462	MA0847.2	5.21e-05	-	177	Upstream	HVAEP1_G000795
chr-1	27661450	27661460	MA0546.1	5.29e-05	-	177	Upstream	HVAEP1_G000795
chr-1	27661454	27661469	MA0659.2	2.4e-05	+	171	Upstream	HVAEP1_G000795
chr-1	27661454	27661470	MA0495.3	1.58e-05	+	170	Upstream	HVAEP1_G000795
chr-1	27661455	27661467	MA0117.2	2.81e-05	-	171	Upstream	HVAEP1_G000795
chr-1	27778756	27778770	MA1621.1	1.79e-05	-	NA	NA	NA
chr-1	27778758	27778768	MA1570.1	4.2e-05	+	NA	NA	NA
chr-1	28929160	28929172	MA0095.2	2.39e-05	+	4837	Upstream	HVAEP1_G000844
chr-1	28933996	28934010	MA1544.1	9.07e-05	-	0	OverlapStart	HVAEP1_G000844
chr-1	28934000	28934010	MA1484.1	8.67e-05	+	2	OverlapStart	HVAEP1_G000844
chr-1	28934000	28934011	MA0762.1	3.35e-05	+	2	OverlapStart	HVAEP1_G000844
chr-1	28934001	28934011	MA0474.2	2.48e-05	+	3	OverlapStart	HVAEP1_G000844
chr-1	28934001	28934011	MA0475.2	2.05e-05	+	3	OverlapStart	HVAEP1_G000844
chr-1	28934001	28934011	MA0624.1	4.29e-05	-	3	OverlapStart	HVAEP1_G000844
chr-1	28934001	28934011	MA0625.1	9.24e-05	-	3	OverlapStart	HVAEP1_G000844
chr-1	28934001	28934011	MA1525.1	4.99e-05	+	3	OverlapStart	HVAEP1_G000844
chr-1	28934003	28934014	MA1647.1	7.07e-05	-	5	PeakInsideFeature	HVAEP1_G000844
chr-1	28934105	28934117	MA1421.1	2.98e-06	+	108	PeakInsideFeature	HVAEP1_G000844
chr-1	28934107	28934118	MA0769.2	1.04e-05	-	109	PeakInsideFeature	HVAEP1_G000844
chr-1	28934109	28934122	MA0114.4	1.96e-06	+	112	PeakInsideFeature	HVAEP1_G000844
chr-1	28934109	28934122	MA0484.2	2.01e-06	+	112	PeakInsideFeature	HVAEP1_G000844
chr-1	28934115	28934121	MA0130.1	9.71e-05	+	115	PeakInsideFeature	HVAEP1_G000844
chr-1	28934409	28934417	MA0719.1	1.01e-05	+	410	PeakInsideFeature	HVAEP1_G000844
chr-1	28934409	28934420	MA0467.1	6.57e-05	-	411	PeakInsideFeature	HVAEP1_G000844
chr-1	28959820	28959838	MA1149.1	1.62e-05	+	25826	Downstream	HVAEP1_G000844
chr-1	28959824	28959839	MA0751.1	7.7e-05	-	25828	Downstream	HVAEP1_G000844
chr-1	28959824	28959840	MA0733.1	7.61e-05	-	25829	Downstream	HVAEP1_G000844
chr-1	28959824	28959840	MA0735.1	5.64e-06	-	25829	Downstream	HVAEP1_G000844
chr-1	28959824	28959840	MA1584.1	6.67e-05	-	25829	Downstream	HVAEP1_G000844
chr-1	28959825	28959839	MA0736.1	8.18e-06	-	25829	Downstream	HVAEP1_G000844
chr-1	28959825	28959843	MA0657.1	6.14e-05	-	25831	Downstream	HVAEP1_G000844
chr-1	28959826	28959841	MA1491.1	8.36e-05	-	25830	Downstream	HVAEP1_G000844
chr-1	28959827	28959843	MA1107.2	1.89e-06	-	25832	Downstream	HVAEP1_G000844
chr-1	28959828	28959840	MA0456.1	1.8e-05	-	25831	Downstream	HVAEP1_G000844
chr-1	28959828	28959842	MA0740.1	4.5e-05	-	25832	Downstream	HVAEP1_G000844
chr-1	28959828	28959842	MA1627.1	6.45e-05	-	25832	Downstream	HVAEP1_G000844
chr-1	28959828	28959844	MA0733.1	9.12e-05	-	25833	Downstream	HVAEP1_G000844
chr-1	28959829	28959841	MA1564.1	8.18e-06	-	25832	Downstream	HVAEP1_G000844
chr-1	28959829	28959842	MA0753.2	8.49e-05	-	25832	Downstream	HVAEP1_G000844
chr-1	28959830	28959841	MA0741.1	3.97e-05	-	25832	Downstream	HVAEP1_G000844
chr-1	28959830	28959841	MA1511.1	2.82e-05	-	25832	Downstream	HVAEP1_G000844
chr-1	28959830	28959841	MA1512.1	3.13e-05	-	25832	Downstream	HVAEP1_G000844
chr-1	28959831	28959842	MA1515.1	4.55e-05	-	25833	Downstream	HVAEP1_G000844
chr-1	28959831	28959842	MA1516.1	1.87e-05	-	25833	Downstream	HVAEP1_G000844
chr-1	28959832	28959842	MA1523.1	2.81e-05	-	25834	Downstream	HVAEP1_G000844
chr-1	28959886	28959902	MA0683.1	8.24e-06	+	25891	Downstream	HVAEP1_G000844
chr-1	28959886	28959902	MA0791.1	2.94e-05	+	25891	Downstream	HVAEP1_G000844
chr-1	28959905	28959919	MA0069.1	1.42e-05	-	25909	Downstream	HVAEP1_G000844
chr-1	28959909	28959915	MA0260.1	9.71e-05	+	25909	Downstream	HVAEP1_G000844
chr-1	28959923	28959937	MA0901.2	4.64e-05	-	25927	Downstream	HVAEP1_G000844
chr-1	28959956	28959973	MA0629.1	3.47e-05	-	25961	Downstream	HVAEP1_G000844
chr-1	28959959	28959971	MA1655.1	7.79e-05	+	25962	Downstream	HVAEP1_G000844
chr-1	28959960	28959974	MA0832.1	3.65e-05	-	25964	Downstream	HVAEP1_G000844
chr-1	28959963	28959980	MA0631.1	4.02e-05	+	25968	Downstream	HVAEP1_G000844
chr-1	28959966	28959977	MA0111.1	1.54e-05	+	25968	Downstream	HVAEP1_G000844
chr-1	28960935	28960946	MA0769.2	9.52e-05	+	26937	Downstream	HVAEP1_G000844
chr-1	28961019	28961030	MA0446.1	3.62e-05	-	27021	Downstream	HVAEP1_G000844
chr-1	28961095	28961109	MA0737.1	6.89e-05	+	27099	Downstream	HVAEP1_G000844
chr-1	28961095	28961110	MA0697.1	6.11e-05	+	27099	Downstream	HVAEP1_G000844
chr-1	28961095	28961110	MA0751.1	8.96e-05	+	27099	Downstream	HVAEP1_G000844
chr-1	28961096	28961111	MA0531.1	5.56e-05	-	27100	Downstream	HVAEP1_G000844
chr-1	28961098	28961111	MA0813.1	7.69e-05	+	27101	Downstream	HVAEP1_G000844
chr-1	28961098	28961111	MA0815.1	7.79e-05	-	27101	Downstream	HVAEP1_G000844
chr-1	28961098	28961111	MA0872.1	8.92e-05	+	27101	Downstream	HVAEP1_G000844
chr-1	28961099	28961111	MA0524.2	5e-05	-	27102	Downstream	HVAEP1_G000844
chr-1	28961099	28961111	MA0810.1	3.78e-05	+	27102	Downstream	HVAEP1_G000844
chr-1	28961099	28961111	MA0811.1	3.68e-05	+	27102	Downstream	HVAEP1_G000844
chr-1	28961100	28961111	MA0812.1	5.91e-05	+	27102	Downstream	HVAEP1_G000844
chr-1	28961104	28961119	MA0108.2	1.12e-05	-	27108	Downstream	HVAEP1_G000844
chr-1	28961150	28961158	MA1440.1	8.55e-05	-	27151	Downstream	HVAEP1_G000844
chr-1	28961177	28961191	MA1485.1	4.97e-05	+	27181	Downstream	HVAEP1_G000844
chr-1	28961178	28961189	MA0249.2	1.07e-05	+	27180	Downstream	HVAEP1_G000844
chr-1	28961179	28961189	MA0633.1	5.01e-05	-	27181	Downstream	HVAEP1_G000844
chr-1	28961179	28961189	MA0669.1	4.73e-05	+	27181	Downstream	HVAEP1_G000844
chr-1	28961179	28961189	MA1468.1	3.97e-05	+	27181	Downstream	HVAEP1_G000844
chr-1	28961482	28961490	MA0674.1	4.28e-05	+	27483	Downstream	HVAEP1_G000844
chr-1	28961482	28961491	MA1530.1	6.84e-05	+	27483	Downstream	HVAEP1_G000844
chr-1	28961648	28961663	MA0532.1	8.87e-05	-	27652	Downstream	HVAEP1_G000844
chr-1	28961702	28961716	MA0761.2	4.69e-05	-	27706	Downstream	HVAEP1_G000844
chr-1	28961705	28961717	MA1508.1	5.08e-06	-	27708	Downstream	HVAEP1_G000844
chr-1	28961705	28961721	MA0540.1	9.97e-05	+	27710	Downstream	HVAEP1_G000844
chr-1	28961720	28961731	MA0445.1	3.1e-05	-	27722	Downstream	HVAEP1_G000844
chr-1	28970533	28970544	MA0506.1	4.31e-05	-	27717	PeakInsideFeature	HVAEP1_G000845
chr-1	28989268	28989283	MA1640.1	2.91e-05	-	8980	PeakInsideFeature	HVAEP1_G000845
chr-1	28989269	28989282	MA1113.2	2.52e-05	+	8980	PeakInsideFeature	HVAEP1_G000845
chr-1	28990395	28990406	MA0454.1	3.62e-05	-	7855	PeakInsideFeature	HVAEP1_G000845
chr-1	28990395	28990406	MA0909.2	7.1e-05	-	7855	PeakInsideFeature	HVAEP1_G000845
chr-1	28990397	28990409	MA0502.2	6.24e-05	+	7852	PeakInsideFeature	HVAEP1_G000845
chr-1	28990400	28990418	MA1529.1	2.05e-05	-	7846	PeakInsideFeature	HVAEP1_G000845
chr-1	28990402	28990415	MA0499.2	2.58e-05	-	7847	PeakInsideFeature	HVAEP1_G000845
chr-1	28990402	28990415	MA0830.2	1.66e-05	-	7847	PeakInsideFeature	HVAEP1_G000845
chr-1	28990402	28990415	MA1631.1	5.12e-06	-	7847	PeakInsideFeature	HVAEP1_G000845
chr-1	28990402	28990416	MA1621.1	1.63e-05	-	7846	PeakInsideFeature	HVAEP1_G000845
chr-1	28990403	28990414	MA0522.3	1.58e-05	-	7847	PeakInsideFeature	HVAEP1_G000845
chr-1	28990403	28990414	MA0545.1	5.59e-06	+	7847	PeakInsideFeature	HVAEP1_G000845
chr-1	28990403	28990414	MA1648.1	1.54e-05	-	7847	PeakInsideFeature	HVAEP1_G000845
chr-1	28990403	28990416	MA0499.2	9.25e-07	+	7846	PeakInsideFeature	HVAEP1_G000845
chr-1	28990403	28990416	MA0830.2	2.39e-05	+	7846	PeakInsideFeature	HVAEP1_G000845
chr-1	28990403	28990416	MA1618.1	6.44e-06	+	7846	PeakInsideFeature	HVAEP1_G000845
chr-1	28990403	28990416	MA1631.1	1.96e-05	+	7846	PeakInsideFeature	HVAEP1_G000845
chr-1	28990404	28990414	MA0048.2	4.48e-06	-	7846	PeakInsideFeature	HVAEP1_G000845
chr-1	28990404	28990414	MA0691.1	1.47e-05	-	7846	PeakInsideFeature	HVAEP1_G000845
chr-1	28990404	28990414	MA0820.1	4e-05	-	7846	PeakInsideFeature	HVAEP1_G000845
chr-1	28990404	28990414	MA1472.1	1.69e-06	-	7846	PeakInsideFeature	HVAEP1_G000845
chr-1	28990404	28990414	MA1635.1	7.04e-06	-	7846	PeakInsideFeature	HVAEP1_G000845
chr-1	28990404	28990415	MA0521.1	4.36e-06	+	7846	PeakInsideFeature	HVAEP1_G000845
chr-1	28990404	28990415	MA0545.1	3.39e-08	-	7846	PeakInsideFeature	HVAEP1_G000845
chr-1	28998089	28998101	MA1655.1	4.71e-05	+	160	PeakInsideFeature	HVAEP1_G000845
chr-1	28998095	28998106	MA1644.1	9.32e-05	+	155	PeakInsideFeature	HVAEP1_G000845
chr-1	28998277	28998290	MA0698.1	2.42e-05	+	28	Upstream	HVAEP1_G000845
chr-1	28998277	28998290	MA1123.2	5.47e-05	+	28	Upstream	HVAEP1_G000845
chr-1	28998277	28998291	MA0832.1	6.04e-05	-	29	Upstream	HVAEP1_G000845
chr-1	28998278	28998291	MA1618.1	3.44e-05	+	29	Upstream	HVAEP1_G000845
chr-1	28998279	28998289	MA0048.2	7.2e-05	-	29	Upstream	HVAEP1_G000845
chr-1	28998279	28998289	MA0669.1	9.26e-05	-	29	Upstream	HVAEP1_G000845
chr-1	28998279	28998289	MA0816.1	2.03e-05	-	29	Upstream	HVAEP1_G000845
chr-1	28998279	28998289	MA1467.1	2.65e-05	-	29	Upstream	HVAEP1_G000845
chr-1	28998279	28998289	MA1468.1	6e-05	-	29	Upstream	HVAEP1_G000845
chr-1	28998279	28998289	MA1638.1	4.15e-05	+	29	Upstream	HVAEP1_G000845
chr-1	28998279	28998290	MA0521.1	8.23e-05	+	29	Upstream	HVAEP1_G000845
chr-1	28998279	28998291	MA0091.1	2.42e-05	-	30	Upstream	HVAEP1_G000845
chr-1	28998280	28998288	MA0607.1	9.66e-05	+	29	Upstream	HVAEP1_G000845
chr-1	28998302	28998310	MA0682.2	8.72e-05	-	51	Upstream	HVAEP1_G000845
chr-1	28998302	28998310	MA0915.1	9.11e-05	-	51	Upstream	HVAEP1_G000845
chr-1	28998302	28998310	MA1443.1	5.19e-05	-	51	Upstream	HVAEP1_G000845
chr-1	28998302	28998310	MA1547.1	2.91e-05	-	51	Upstream	HVAEP1_G000845
chr-1	28998302	28998311	MA0714.1	7.71e-05	-	51	Upstream	HVAEP1_G000845
chr-1	28998619	28998631	MA1474.1	3.34e-05	+	370	Upstream	HVAEP1_G000845
chr-1	28998677	28998690	MA0698.1	1.51e-05	+	428	Upstream	HVAEP1_G000845
chr-1	28998677	28998690	MA1123.2	1.65e-05	+	428	Upstream	HVAEP1_G000845
chr-1	28998677	28998690	MA1631.1	5.82e-05	-	428	Upstream	HVAEP1_G000845
chr-1	28998677	28998690	MA1642.1	1.71e-05	+	428	Upstream	HVAEP1_G000845
chr-1	28998677	28998691	MA0832.1	1.59e-05	-	429	Upstream	HVAEP1_G000845
chr-1	28998678	28998690	MA0500.2	6.87e-05	-	429	Upstream	HVAEP1_G000845
chr-1	28998678	28998690	MA1620.1	8.01e-05	-	429	Upstream	HVAEP1_G000845
chr-1	28998678	28998691	MA1109.1	2.89e-05	+	429	Upstream	HVAEP1_G000845
chr-1	28998678	28998691	MA1618.1	3.76e-06	+	429	Upstream	HVAEP1_G000845
chr-1	28998679	28998689	MA0048.2	7.2e-05	-	429	Upstream	HVAEP1_G000845
chr-1	28998679	28998689	MA0816.1	2.03e-05	-	429	Upstream	HVAEP1_G000845
chr-1	28998679	28998689	MA1638.1	4.15e-05	+	429	Upstream	HVAEP1_G000845
chr-1	28998679	28998690	MA0521.1	5.05e-05	+	429	Upstream	HVAEP1_G000845
chr-1	28998679	28998691	MA0091.1	9.92e-06	-	430	Upstream	HVAEP1_G000845
chr-1	28998680	28998688	MA0607.1	9.66e-05	+	429	Upstream	HVAEP1_G000845
chr-1	29088812	29088824	MA0131.2	4.09e-05	-	12088	Upstream	HVAEP1_G000847
chr-1	29088813	29088825	MA0694.1	7.65e-05	-	12089	Upstream	HVAEP1_G000847
chr-1	29088918	29088928	MA0101.1	1.47e-05	-	12193	Upstream	HVAEP1_G000847
chr-1	29088918	29088928	MA0107.1	1.47e-05	-	12193	Upstream	HVAEP1_G000847
chr-1	29156742	29156753	MA1703.1	7.74e-06	+	142	PeakInsideFeature	HVAEP1_G000850
chr-1	29156744	29156752	MA1439.1	4.94e-05	+	141	PeakInsideFeature	HVAEP1_G000850
chr-1	29156744	29156754	MA0766.2	9.94e-05	+	140	PeakInsideFeature	HVAEP1_G000850
chr-1	29156761	29156777	MA0864.2	7.74e-05	-	120	PeakInsideFeature	HVAEP1_G000850
chr-1	29156762	29156776	MA0470.2	6.36e-05	-	120	PeakInsideFeature	HVAEP1_G000850
chr-1	29156775	29156785	MA0635.1	3.13e-05	+	109	PeakInsideFeature	HVAEP1_G000850
chr-1	29156781	29156801	MA0073.1	4.61e-06	-	98	PeakInsideFeature	HVAEP1_G000850
chr-1	29156783	29156794	MA0445.1	2.16e-05	+	101	PeakInsideFeature	HVAEP1_G000850
chr-1	29156796	29156808	MA0019.1	4.77e-05	-	87	PeakInsideFeature	HVAEP1_G000850
chr-1	29156834	29156845	MA0651.1	3.53e-05	+	50	PeakInsideFeature	HVAEP1_G000850
chr-1	29156834	29156845	MA0873.1	7.3e-05	+	50	PeakInsideFeature	HVAEP1_G000850
chr-1	29156834	29156845	MA0906.1	3.15e-05	+	50	PeakInsideFeature	HVAEP1_G000850
chr-1	29156834	29156845	MA0907.1	5.96e-06	+	50	PeakInsideFeature	HVAEP1_G000850
chr-1	29156834	29156845	MA1506.1	5.75e-05	+	50	PeakInsideFeature	HVAEP1_G000850
chr-1	29156834	29156846	MA0911.1	3.23e-05	+	49	PeakInsideFeature	HVAEP1_G000850
chr-1	29156835	29156845	MA1503.1	9.18e-05	+	49	PeakInsideFeature	HVAEP1_G000850
chr-1	29156860	29156876	MA0510.2	9.97e-07	-	21	PeakInsideFeature	HVAEP1_G000850
chr-1	29156860	29156876	MA0600.2	1.84e-06	-	21	PeakInsideFeature	HVAEP1_G000850
chr-1	29156860	29156876	MA0799.1	9.6e-06	-	21	PeakInsideFeature	HVAEP1_G000850
chr-1	29156883	29156900	MA0629.1	4.01e-05	-	2	OverlapStart	HVAEP1_G000850
chr-1	29156915	29156927	MA0641.1	4.54e-05	+	32	Upstream	HVAEP1_G000850
chr-1	29156915	29156927	MA1483.1	4.73e-05	+	32	Upstream	HVAEP1_G000850
chr-1	29156916	29156927	MA0136.2	8.4e-05	+	32	Upstream	HVAEP1_G000850
chr-1	29156917	29156927	MA0028.2	5.78e-05	+	33	Upstream	HVAEP1_G000850
chr-1	29156917	29156927	MA0156.2	5.77e-05	+	33	Upstream	HVAEP1_G000850
chr-1	29156917	29156927	MA0475.2	9.78e-05	+	33	Upstream	HVAEP1_G000850
chr-1	29156917	29156927	MA0645.1	8.51e-05	+	33	Upstream	HVAEP1_G000850
chr-1	29156917	29156927	MA0759.1	5.51e-05	+	33	Upstream	HVAEP1_G000850
chr-1	29156917	29156928	MA0765.2	9.31e-05	-	33	Upstream	HVAEP1_G000850
chr-1	29156918	29156925	MA0026.1	7.28e-05	+	32	Upstream	HVAEP1_G000850
chr-1	29189413	29189426	MA0698.1	4.59e-05	+	485	Upstream	HVAEP1_G000854
chr-1	29189413	29189426	MA1618.1	7.25e-05	-	485	Upstream	HVAEP1_G000854
chr-1	29189413	29189427	MA0832.1	8.51e-06	+	486	Upstream	HVAEP1_G000854
chr-1	29189414	29189425	MA0521.1	1.12e-05	-	485	Upstream	HVAEP1_G000854
chr-1	29189414	29189425	MA0545.1	7.13e-05	+	485	Upstream	HVAEP1_G000854
chr-1	29189414	29189426	MA0500.2	1.89e-05	+	486	Upstream	HVAEP1_G000854
chr-1	29189414	29189426	MA1619.1	5.43e-06	+	486	Upstream	HVAEP1_G000854
chr-1	29189414	29189426	MA1620.1	2.4e-05	+	486	Upstream	HVAEP1_G000854
chr-1	29189414	29189426	MA1641.1	5.17e-06	-	486	Upstream	HVAEP1_G000854
chr-1	29189414	29189427	MA0499.2	6.4e-05	+	486	Upstream	HVAEP1_G000854
chr-1	29189414	29189427	MA0698.1	7.44e-05	-	486	Upstream	HVAEP1_G000854
chr-1	29189414	29189427	MA1618.1	3.52e-05	+	486	Upstream	HVAEP1_G000854
chr-1	29189414	29189434	MA0073.1	3.64e-05	-	490	Upstream	HVAEP1_G000854
chr-1	29189415	29189425	MA0048.2	1.04e-05	+	486	Upstream	HVAEP1_G000854
chr-1	29189415	29189425	MA0665.1	3.85e-06	-	486	Upstream	HVAEP1_G000854
chr-1	29189415	29189425	MA0667.1	9.62e-06	+	486	Upstream	HVAEP1_G000854
chr-1	29189415	29189425	MA0691.1	5.65e-06	+	486	Upstream	HVAEP1_G000854
chr-1	29189415	29189425	MA0816.1	9.53e-06	+	486	Upstream	HVAEP1_G000854
chr-1	29189415	29189425	MA0820.1	3.05e-05	-	486	Upstream	HVAEP1_G000854
chr-1	29189415	29189425	MA1100.2	3.34e-05	+	486	Upstream	HVAEP1_G000854
chr-1	29189415	29189425	MA1467.1	5.93e-06	+	486	Upstream	HVAEP1_G000854
chr-1	29189415	29189425	MA1472.1	6.19e-06	-	486	Upstream	HVAEP1_G000854
chr-1	29189415	29189426	MA0521.1	2.38e-05	+	486	Upstream	HVAEP1_G000854
chr-1	29189415	29189426	MA0545.1	1.42e-05	-	486	Upstream	HVAEP1_G000854
chr-1	29189415	29189427	MA0091.1	4.73e-05	-	487	Upstream	HVAEP1_G000854
chr-1	29189493	29189506	MA0018.4	1.24e-05	+	565	Upstream	HVAEP1_G000854
chr-1	29189493	29189506	MA1632.1	5.95e-06	+	565	Upstream	HVAEP1_G000854
chr-1	29189496	29189506	MA1438.1	5.14e-05	-	567	Upstream	HVAEP1_G000854
chr-1	29288626	29288639	MA0698.1	2.26e-05	+	3694	Upstream	HVAEP1_G000859
chr-1	29288626	29288639	MA0830.2	4.87e-05	-	3694	Upstream	HVAEP1_G000859
chr-1	29288626	29288639	MA1123.2	1.13e-05	+	3694	Upstream	HVAEP1_G000859
chr-1	29288626	29288639	MA1631.1	3.84e-05	-	3694	Upstream	HVAEP1_G000859
chr-1	29288626	29288639	MA1642.1	2.14e-06	+	3694	Upstream	HVAEP1_G000859
chr-1	29288627	29288638	MA0522.3	4.95e-05	-	3694	Upstream	HVAEP1_G000859
chr-1	29288627	29288638	MA1648.1	7.42e-05	-	3694	Upstream	HVAEP1_G000859
chr-1	29288627	29288640	MA1109.1	7.37e-06	+	3695	Upstream	HVAEP1_G000859
chr-1	29288627	29288640	MA1618.1	3.54e-05	+	3695	Upstream	HVAEP1_G000859
chr-1	29288628	29288638	MA0048.2	5.67e-05	-	3695	Upstream	HVAEP1_G000859
chr-1	29288628	29288638	MA1100.2	8.61e-05	+	3695	Upstream	HVAEP1_G000859
chr-1	29288628	29288638	MA1472.1	7.65e-05	-	3695	Upstream	HVAEP1_G000859
chr-1	29288628	29288638	MA1638.1	7.54e-06	+	3695	Upstream	HVAEP1_G000859
chr-1	29288629	29288637	MA0607.1	4.66e-05	-	3695	Upstream	HVAEP1_G000859
chr-1	29288629	29288639	MA0109.1	5.61e-05	-	3696	Upstream	HVAEP1_G000859
chr-1	29288629	29288643	MA1656.1	9.59e-06	-	3698	Upstream	HVAEP1_G000859
chr-1	29288679	29288700	MA0138.2	6.14e-05	-	3751	Upstream	HVAEP1_G000859
chr-1	29721904	29721915	MA0442.2	5.43e-05	-	2827	Upstream	HVAEP1_G000879
chr-1	29721964	29721975	MA0878.2	7.66e-05	+	2767	Upstream	HVAEP1_G000879
chr-1	29721964	29721975	MA1506.1	2.89e-05	+	2767	Upstream	HVAEP1_G000879
chr-1	29721965	29721975	MA0485.2	6.27e-05	+	2766	Upstream	HVAEP1_G000879
chr-1	29721965	29721975	MA0905.1	4.69e-05	+	2766	Upstream	HVAEP1_G000879
chr-1	29721965	29721975	MA0908.1	5.33e-05	+	2766	Upstream	HVAEP1_G000879
chr-1	29721965	29721975	MA0913.2	6.81e-05	+	2766	Upstream	HVAEP1_G000879
chr-1	29721965	29721975	MA1503.1	5.89e-05	+	2766	Upstream	HVAEP1_G000879
chr-1	29722030	29722041	MA1118.1	8.5e-05	-	2701	Upstream	HVAEP1_G000879
chr-1	29744525	29744542	MA0516.2	1.74e-05	+	254	PeakInsideFeature	HVAEP1_G000881
chr-1	29744526	29744540	MA1700.1	6.79e-06	-	254	PeakInsideFeature	HVAEP1_G000881
chr-1	29744526	29744541	MA1514.1	1.36e-05	+	254	PeakInsideFeature	HVAEP1_G000881
chr-1	29744527	29744540	MA0471.2	5.73e-05	-	254	PeakInsideFeature	HVAEP1_G000881
chr-1	29744528	29744540	MA1653.1	2.9e-05	+	253	PeakInsideFeature	HVAEP1_G000881
chr-1	29744528	29744541	MA1615.1	6.77e-05	-	253	PeakInsideFeature	HVAEP1_G000881
chr-1	29744531	29744543	MA0039.4	1.1e-05	+	250	PeakInsideFeature	HVAEP1_G000881
chr-1	29744531	29744546	MA0531.1	1.36e-05	-	249	PeakInsideFeature	HVAEP1_G000881
chr-1	29744533	29744548	MA1514.1	9.13e-05	+	247	PeakInsideFeature	HVAEP1_G000881
chr-1	29744536	29744551	MA1514.1	5.22e-05	+	244	PeakInsideFeature	HVAEP1_G000881
chr-1	29744538	29744551	MA0122.3	4.52e-05	+	243	PeakInsideFeature	HVAEP1_G000881
chr-1	29744542	29744550	MA0914.1	2.28e-05	+	241	PeakInsideFeature	HVAEP1_G000881
chr-1	29744640	29744651	MA1703.1	7.74e-06	+	142	PeakInsideFeature	HVAEP1_G000881
chr-1	29744642	29744650	MA1439.1	4.94e-05	+	141	PeakInsideFeature	HVAEP1_G000881
chr-1	29744642	29744652	MA0766.2	9.94e-05	+	140	PeakInsideFeature	HVAEP1_G000881
chr-1	29744659	29744675	MA0864.2	7.74e-05	-	120	PeakInsideFeature	HVAEP1_G000881
chr-1	29744660	29744674	MA0470.2	6.36e-05	-	120	PeakInsideFeature	HVAEP1_G000881
chr-1	29744673	29744683	MA0635.1	3.13e-05	+	109	PeakInsideFeature	HVAEP1_G000881
chr-1	29744679	29744699	MA0073.1	4.13e-05	-	98	PeakInsideFeature	HVAEP1_G000881
chr-1	29744681	29744692	MA0445.1	3.66e-06	+	101	PeakInsideFeature	HVAEP1_G000881
chr-1	29744732	29744743	MA0907.1	8.84e-05	+	50	PeakInsideFeature	HVAEP1_G000881
chr-1	29744758	29744774	MA0510.2	9.97e-07	-	21	PeakInsideFeature	HVAEP1_G000881
chr-1	29744758	29744774	MA0600.2	1.84e-06	-	21	PeakInsideFeature	HVAEP1_G000881
chr-1	29744758	29744774	MA0799.1	9.6e-06	-	21	PeakInsideFeature	HVAEP1_G000881
chr-1	29744781	29744798	MA0629.1	2.09e-05	-	2	OverlapStart	HVAEP1_G000881
chr-1	29744813	29744825	MA0641.1	4.54e-05	+	32	Upstream	HVAEP1_G000881
chr-1	29744813	29744825	MA1483.1	4.73e-05	+	32	Upstream	HVAEP1_G000881
chr-1	29744814	29744825	MA0136.2	8.4e-05	+	32	Upstream	HVAEP1_G000881
chr-1	29744815	29744825	MA0028.2	5.78e-05	+	33	Upstream	HVAEP1_G000881
chr-1	29744815	29744825	MA0156.2	5.77e-05	+	33	Upstream	HVAEP1_G000881
chr-1	29744815	29744825	MA0475.2	9.78e-05	+	33	Upstream	HVAEP1_G000881
chr-1	29744815	29744825	MA0645.1	8.51e-05	+	33	Upstream	HVAEP1_G000881
chr-1	29744815	29744825	MA0759.1	5.51e-05	+	33	Upstream	HVAEP1_G000881
chr-1	29744815	29744826	MA0765.2	9.31e-05	-	33	Upstream	HVAEP1_G000881
chr-1	29744816	29744823	MA0026.1	7.28e-05	+	32	Upstream	HVAEP1_G000881
chr-1	29761894	29761907	MA0698.1	4.59e-05	+	485	Upstream	HVAEP1_G000883
chr-1	29761894	29761907	MA1618.1	7.25e-05	-	485	Upstream	HVAEP1_G000883
chr-1	29761894	29761908	MA0832.1	8.51e-06	+	486	Upstream	HVAEP1_G000883
chr-1	29761895	29761906	MA0521.1	1.12e-05	-	485	Upstream	HVAEP1_G000883
chr-1	29761895	29761906	MA0545.1	7.13e-05	+	485	Upstream	HVAEP1_G000883
chr-1	29761895	29761907	MA0500.2	1.89e-05	+	486	Upstream	HVAEP1_G000883
chr-1	29761895	29761907	MA1619.1	5.43e-06	+	486	Upstream	HVAEP1_G000883
chr-1	29761895	29761907	MA1620.1	2.4e-05	+	486	Upstream	HVAEP1_G000883
chr-1	29761895	29761907	MA1641.1	5.17e-06	-	486	Upstream	HVAEP1_G000883
chr-1	29761895	29761908	MA0499.2	6.4e-05	+	486	Upstream	HVAEP1_G000883
chr-1	29761895	29761908	MA0698.1	7.44e-05	-	486	Upstream	HVAEP1_G000883
chr-1	29761895	29761908	MA1618.1	3.52e-05	+	486	Upstream	HVAEP1_G000883
chr-1	29761895	29761915	MA0073.1	3.64e-05	-	490	Upstream	HVAEP1_G000883
chr-1	29761896	29761906	MA0048.2	1.04e-05	+	486	Upstream	HVAEP1_G000883
chr-1	29761896	29761906	MA0665.1	3.85e-06	-	486	Upstream	HVAEP1_G000883
chr-1	29761896	29761906	MA0667.1	9.62e-06	+	486	Upstream	HVAEP1_G000883
chr-1	29761896	29761906	MA0691.1	5.65e-06	+	486	Upstream	HVAEP1_G000883
chr-1	29761896	29761906	MA0816.1	9.53e-06	+	486	Upstream	HVAEP1_G000883
chr-1	29761896	29761906	MA0820.1	3.05e-05	-	486	Upstream	HVAEP1_G000883
chr-1	29761896	29761906	MA1100.2	3.34e-05	+	486	Upstream	HVAEP1_G000883
chr-1	29761896	29761906	MA1467.1	5.93e-06	+	486	Upstream	HVAEP1_G000883
chr-1	29761896	29761906	MA1472.1	6.19e-06	-	486	Upstream	HVAEP1_G000883
chr-1	29761896	29761907	MA0521.1	2.38e-05	+	486	Upstream	HVAEP1_G000883
chr-1	29761896	29761907	MA0545.1	1.42e-05	-	486	Upstream	HVAEP1_G000883
chr-1	29761896	29761908	MA0091.1	4.73e-05	-	487	Upstream	HVAEP1_G000883
chr-1	29761975	29761988	MA0018.4	1.24e-05	+	566	Upstream	HVAEP1_G000883
chr-1	29761975	29761988	MA1632.1	5.95e-06	+	566	Upstream	HVAEP1_G000883
chr-1	29761978	29761988	MA1438.1	5.14e-05	-	568	Upstream	HVAEP1_G000883
chr-1	29762600	29762614	MA0237.2	2.01e-05	-	1192	Upstream	HVAEP1_G000883
chr-1	29797436	29797451	MA0869.1	1.95e-05	-	10283	Upstream	HVAEP1_G000885
chr-1	29797552	29797562	MA0101.1	1.47e-05	+	10169	Upstream	HVAEP1_G000885
chr-1	29797552	29797562	MA0107.1	1.47e-05	+	10169	Upstream	HVAEP1_G000885
chr-1	29797655	29797667	MA0694.1	7.65e-05	+	10065	Upstream	HVAEP1_G000885
chr-1	29797656	29797668	MA0131.2	4.09e-05	+	10064	Upstream	HVAEP1_G000885
chr-1	29990281	29990295	MA1645.1	5.37e-05	+	749	PeakInsideFeature	HVAEP1_G000891
chr-1	29990282	29990292	MA1523.1	7.16e-06	+	750	PeakInsideFeature	HVAEP1_G000891
chr-1	29990282	29990293	MA0503.1	3.01e-05	+	750	PeakInsideFeature	HVAEP1_G000891
chr-1	29990283	29990294	MA0063.2	1.12e-05	+	749	PeakInsideFeature	HVAEP1_G000891
chr-1	30438763	30438774	MA0467.1	2.3e-05	-	1457	Downstream	HVAEP1_G000908
chr-1	30438769	30438782	MA1623.1	9.61e-05	-	1450	Downstream	HVAEP1_G000908
chr-1	30438925	30438932	MA0164.1	4.56e-05	+	1297	Downstream	HVAEP1_G000908
chr-1	30439267	30439279	MA0041.1	5.04e-05	-	952	Downstream	HVAEP1_G000908
chr-1	30439339	30439352	MA1603.1	3.71e-05	-	880	Downstream	HVAEP1_G000908
chr-1	30439515	30439532	MA1541.1	8.04e-05	+	702	Downstream	HVAEP1_G000908
chr-1	30439526	30439537	MA0899.1	4.45e-05	+	694	Downstream	HVAEP1_G000908
chr-1	30439527	30439535	MA0674.1	4.28e-05	+	694	Downstream	HVAEP1_G000908
chr-1	30439527	30439536	MA1530.1	6.84e-05	+	694	Downstream	HVAEP1_G000908
chr-1	30439563	30439578	MA0142.1	2.54e-05	-	655	Downstream	HVAEP1_G000908
chr-1	30439639	30439651	MA0776.1	2.41e-05	+	580	Downstream	HVAEP1_G000908
chr-1	30439657	30439669	MA0783.1	6.18e-05	-	562	Downstream	HVAEP1_G000908
chr-1	30439657	30439669	MA0797.1	7.56e-05	-	562	Downstream	HVAEP1_G000908
chr-1	30439664	30439675	MA0480.1	2.32e-05	-	556	Downstream	HVAEP1_G000908
chr-1	30439665	30439677	MA1655.1	8.12e-05	+	554	Downstream	HVAEP1_G000908
chr-1	30439668	30439678	MA0665.1	4.27e-05	-	552	Downstream	HVAEP1_G000908
chr-1	30619756	30619768	MA1655.1	3.11e-05	-	NA	NA	NA
chr-1	31416175	31416183	MA0222.1	1.27e-05	+	4276	PeakInsideFeature	HVAEP1_G000938
chr-1	31416190	31416205	MA0520.1	2.07e-05	-	4258	PeakInsideFeature	HVAEP1_G000938
chr-1	31416771	31416787	MA0088.2	2.44e-05	+	3676	PeakInsideFeature	HVAEP1_G000938
chr-1	31475447	31475459	MA1421.1	2.38e-05	+	104	PeakInsideFeature	HVAEP1_G000942
chr-1	31524835	31524847	MA1421.1	2.38e-05	+	208	Upstream	HVAEP1_G000944
chr-1	31582575	31582586	MA0076.2	4.66e-05	+	1869	Upstream	HVAEP1_G000946
chr-1	31582576	31582586	MA0098.3	9.65e-06	-	1870	Upstream	HVAEP1_G000946
chr-1	31582576	31582586	MA0156.2	9.51e-06	-	1870	Upstream	HVAEP1_G000946
chr-1	31582576	31582586	MA0474.2	8.22e-06	-	1870	Upstream	HVAEP1_G000946
chr-1	31582576	31582586	MA0475.2	6.07e-06	-	1870	Upstream	HVAEP1_G000946
chr-1	31582576	31582586	MA0645.1	5.8e-05	-	1870	Upstream	HVAEP1_G000946
chr-1	31582576	31582587	MA0762.1	2.9e-06	-	1870	Upstream	HVAEP1_G000946
chr-1	31582577	31582587	MA1484.1	9.71e-06	-	1871	Upstream	HVAEP1_G000946
chr-1	31582798	31582818	MA0073.1	5.04e-05	-	2097	Upstream	HVAEP1_G000946
chr-1	31583096	31583104	MA0158.2	2.91e-05	-	2389	Upstream	HVAEP1_G000946
chr-1	31583096	31583104	MA0910.2	4.8e-05	-	2389	Upstream	HVAEP1_G000946
chr-1	31583096	31583104	MA1496.1	5.43e-05	-	2389	Upstream	HVAEP1_G000946
chr-1	31583096	31583104	MA1498.1	5.43e-05	-	2389	Upstream	HVAEP1_G000946
chr-1	31583096	31583104	MA1500.1	9.49e-05	+	2389	Upstream	HVAEP1_G000946
chr-1	31583096	31583104	MA1502.1	4.8e-05	-	2389	Upstream	HVAEP1_G000946
chr-1	31583096	31583104	MA1504.1	5.57e-05	-	2389	Upstream	HVAEP1_G000946
chr-1	31583096	31583104	MA1507.1	6.2e-05	-	2389	Upstream	HVAEP1_G000946
chr-1	31583647	31583658	MA0467.1	2.62e-05	+	2928	PeakInsideFeature	HVAEP1_G000947
chr-1	31583648	31583660	MA0712.2	6.02e-05	+	2926	PeakInsideFeature	HVAEP1_G000947
chr-1	31583650	31583658	MA0682.2	7.08e-05	-	2926	PeakInsideFeature	HVAEP1_G000947
chr-1	31583650	31583658	MA1443.1	9.11e-05	-	2926	PeakInsideFeature	HVAEP1_G000947
chr-1	31583658	31583669	MA1117.1	7.02e-05	-	2917	PeakInsideFeature	HVAEP1_G000947
chr-1	31583679	31583696	MA0874.1	5.2e-05	-	2893	PeakInsideFeature	HVAEP1_G000947
chr-1	31583709	31583719	MA1116.1	3.12e-05	-	2866	PeakInsideFeature	HVAEP1_G000947
chr-1	31609594	31609606	MA0041.1	5e-05	+	601	PeakInsideFeature	HVAEP1_G000950
chr-1	31609598	31609610	MA0041.1	3.61e-06	+	605	PeakInsideFeature	HVAEP1_G000950
chr-1	31609601	31609612	MA0446.1	5.37e-06	+	607	PeakInsideFeature	HVAEP1_G000950
chr-1	31609616	31609626	MA0690.1	4.61e-05	+	622	PeakInsideFeature	HVAEP1_G000950
chr-1	31609616	31609626	MA1567.1	8.23e-05	+	622	PeakInsideFeature	HVAEP1_G000950
chr-1	31609616	31609627	MA0688.1	2.04e-05	+	622	PeakInsideFeature	HVAEP1_G000950
chr-1	31609616	31609627	MA0689.1	4.09e-06	+	622	PeakInsideFeature	HVAEP1_G000950
chr-1	31609616	31609629	MA0800.1	7.97e-05	+	623	PeakInsideFeature	HVAEP1_G000950
chr-1	31609617	31609625	MA0801.1	4.95e-05	+	622	PeakInsideFeature	HVAEP1_G000950
chr-1	31609617	31609625	MA0803.1	4.37e-05	+	622	PeakInsideFeature	HVAEP1_G000950
chr-1	31609617	31609625	MA0805.1	6.55e-05	+	622	PeakInsideFeature	HVAEP1_G000950
chr-1	31609617	31609625	MA0806.1	3.88e-05	+	622	PeakInsideFeature	HVAEP1_G000950
chr-1	31609617	31609625	MA0807.1	4.47e-05	+	622	PeakInsideFeature	HVAEP1_G000950
chr-1	31609617	31609627	MA0802.1	2.3e-05	+	623	PeakInsideFeature	HVAEP1_G000950
chr-1	31609619	31609633	MA0043.3	5.77e-05	+	627	PeakInsideFeature	HVAEP1_G000950
chr-1	31609626	31609643	MA0896.1	4.74e-05	+	635	PeakInsideFeature	HVAEP1_G000950
chr-1	31609626	31609643	MA0897.1	2.18e-05	+	635	PeakInsideFeature	HVAEP1_G000950
chr-1	31609628	31609639	MA0060.3	2.28e-05	+	634	PeakInsideFeature	HVAEP1_G000950
chr-1	31609628	31609639	MA1644.1	3.1e-05	+	634	PeakInsideFeature	HVAEP1_G000950
chr-1	31609630	31609638	MA0611.1	2.91e-05	+	635	PeakInsideFeature	HVAEP1_G000950
chr-1	31609636	31609654	MA1529.1	1.22e-06	-	646	PeakInsideFeature	HVAEP1_G000950
chr-1	31609638	31609651	MA0086.2	5.53e-05	+	645	PeakInsideFeature	HVAEP1_G000950
chr-1	31609638	31609651	MA0745.2	1.38e-05	-	645	PeakInsideFeature	HVAEP1_G000950
chr-1	31609638	31609651	MA0830.2	1e-05	-	645	PeakInsideFeature	HVAEP1_G000950
chr-1	31609638	31609651	MA1631.1	9.36e-06	-	645	PeakInsideFeature	HVAEP1_G000950
chr-1	31609638	31609652	MA1621.1	1.67e-06	-	646	PeakInsideFeature	HVAEP1_G000950
chr-1	31609639	31609650	MA0103.3	1.03e-06	-	645	PeakInsideFeature	HVAEP1_G000950
chr-1	31609639	31609650	MA0522.3	9.44e-07	-	645	PeakInsideFeature	HVAEP1_G000950
chr-1	31609639	31609650	MA1648.1	1.6e-06	-	645	PeakInsideFeature	HVAEP1_G000950
chr-1	31609639	31609651	MA1619.1	2.98e-05	-	646	PeakInsideFeature	HVAEP1_G000950
chr-1	31609639	31609651	MA1620.1	1.57e-06	-	646	PeakInsideFeature	HVAEP1_G000950
chr-1	31609640	31609650	MA0048.2	1.9e-06	-	646	PeakInsideFeature	HVAEP1_G000950
chr-1	31609640	31609650	MA0820.1	1.33e-05	-	646	PeakInsideFeature	HVAEP1_G000950
chr-1	31609640	31609650	MA1100.2	8.59e-06	+	646	PeakInsideFeature	HVAEP1_G000950
chr-1	31609640	31609650	MA1558.1	5.49e-07	+	646	PeakInsideFeature	HVAEP1_G000950
chr-1	31609640	31609650	MA1559.1	5.95e-06	+	646	PeakInsideFeature	HVAEP1_G000950
chr-1	31609640	31609651	MA0521.1	2.77e-05	+	646	PeakInsideFeature	HVAEP1_G000950
chr-1	31609645	31609662	MA1455.1	3.05e-05	-	654	PeakInsideFeature	HVAEP1_G000950
chr-1	31609647	31609660	MA1603.1	9.38e-05	-	654	PeakInsideFeature	HVAEP1_G000950
chr-1	31609783	31609794	MA0264.1	6.55e-05	+	789	PeakInsideFeature	HVAEP1_G000950
chr-1	31609784	31609793	MA0673.1	9.96e-05	+	789	PeakInsideFeature	HVAEP1_G000950
chr-1	31629223	31629237	MA1607.1	6.04e-05	+	3095	Upstream	HVAEP1_G000952
chr-1	31629225	31629239	MA0852.2	9.01e-05	+	3097	Upstream	HVAEP1_G000952
chr-1	31629226	31629237	MA0013.1	1.44e-05	+	3096	Upstream	HVAEP1_G000952
chr-1	31629226	31629237	MA0047.3	9.55e-05	+	3096	Upstream	HVAEP1_G000952
chr-1	31629226	31629237	MA0593.1	5.87e-05	+	3096	Upstream	HVAEP1_G000952
chr-1	31629226	31629237	MA1103.2	9.88e-05	+	3096	Upstream	HVAEP1_G000952
chr-1	31629226	31629237	MA1606.1	8.66e-05	+	3096	Upstream	HVAEP1_G000952
chr-1	31629227	31629238	MA0480.1	7.12e-05	-	3097	Upstream	HVAEP1_G000952
chr-1	31629228	31629236	MA0157.2	4.28e-05	+	3097	Upstream	HVAEP1_G000952
chr-1	31629228	31629236	MA0613.1	4.28e-05	+	3097	Upstream	HVAEP1_G000952
chr-1	31629228	31629236	MA0614.1	4.28e-05	+	3097	Upstream	HVAEP1_G000952
chr-1	31629228	31629236	MA0920.1	5.92e-05	+	3097	Upstream	HVAEP1_G000952
chr-1	31629228	31629236	MA1489.1	4.28e-05	+	3097	Upstream	HVAEP1_G000952
chr-1	31666105	31666120	MA1487.1	7.86e-05	+	145	PeakInsideFeature	HVAEP1_G000953
chr-1	31666132	31666142	MA0667.1	2.61e-05	-	170	PeakInsideFeature	HVAEP1_G000953
chr-1	31666135	31666150	MA1579.1	1.52e-06	-	175	PeakInsideFeature	HVAEP1_G000953
chr-1	31666138	31666150	MA1458.1	1.06e-06	-	177	PeakInsideFeature	HVAEP1_G000953
chr-1	31666139	31666149	MA0092.1	4.72e-05	+	177	PeakInsideFeature	HVAEP1_G000953
chr-1	31666140	31666153	MA0090.3	4.25e-06	-	179	PeakInsideFeature	HVAEP1_G000953
chr-1	31666140	31666153	MA1121.1	1.97e-05	-	179	PeakInsideFeature	HVAEP1_G000953
chr-1	31666141	31666153	MA0809.2	5.59e-06	-	180	PeakInsideFeature	HVAEP1_G000953
chr-1	31666143	31666151	MA0808.1	3.79e-05	-	180	PeakInsideFeature	HVAEP1_G000953
chr-1	31666149	31666165	MA0864.2	4.16e-05	-	190	PeakInsideFeature	HVAEP1_G000953
chr-1	31666150	31666160	MA0443.1	3.16e-05	+	188	PeakInsideFeature	HVAEP1_G000953
chr-1	31666150	31666164	MA0470.2	6.31e-05	-	190	PeakInsideFeature	HVAEP1_G000953
chr-1	31666150	31666164	MA0758.1	2.4e-06	-	190	PeakInsideFeature	HVAEP1_G000953
chr-1	31666150	31666165	MA0541.1	2.52e-06	+	190	PeakInsideFeature	HVAEP1_G000953
chr-1	31666151	31666162	MA1513.1	6.42e-05	-	189	PeakInsideFeature	HVAEP1_G000953
chr-1	31666151	31666163	MA0024.3	9.76e-05	+	190	PeakInsideFeature	HVAEP1_G000953
chr-1	31666151	31666163	MA0865.1	5.03e-05	-	190	PeakInsideFeature	HVAEP1_G000953
chr-1	31666151	31666163	MA1565.1	2.41e-05	+	190	PeakInsideFeature	HVAEP1_G000953
chr-1	31666151	31666164	MA0471.2	2.25e-06	+	190	PeakInsideFeature	HVAEP1_G000953
chr-1	31666152	31666161	MA0450.1	1.03e-05	+	189	PeakInsideFeature	HVAEP1_G000953
chr-1	31666152	31666162	MA0599.1	3.55e-05	-	190	PeakInsideFeature	HVAEP1_G000953
chr-1	31666153	31666163	MA1601.1	3.51e-05	+	191	PeakInsideFeature	HVAEP1_G000953
chr-1	31666153	31666164	MA1122.1	2.49e-06	+	191	PeakInsideFeature	HVAEP1_G000953
chr-1	31666154	31666163	MA0597.1	8.06e-05	-	191	PeakInsideFeature	HVAEP1_G000953
chr-1	31666155	31666166	MA1117.1	1.37e-05	-	193	PeakInsideFeature	HVAEP1_G000953
chr-1	31666158	31666168	MA0101.1	9.6e-05	-	196	PeakInsideFeature	HVAEP1_G000953
chr-1	31666158	31666168	MA0107.1	9.63e-06	-	196	PeakInsideFeature	HVAEP1_G000953
chr-1	31666164	31666176	MA0104.4	3.93e-05	-	203	PeakInsideFeature	HVAEP1_G000953
chr-1	31666164	31666176	MA0147.3	8.07e-05	-	203	PeakInsideFeature	HVAEP1_G000953
chr-1	31666164	31666179	MA0154.4	4.05e-05	-	204	PeakInsideFeature	HVAEP1_G000953
chr-1	31666168	31666181	MA0056.2	3.07e-05	-	207	PeakInsideFeature	HVAEP1_G000953
chr-1	31666168	31666186	MA1600.1	1.08e-05	-	210	PeakInsideFeature	HVAEP1_G000953
chr-1	31666170	31666182	MA0528.2	9.15e-07	+	209	PeakInsideFeature	HVAEP1_G000953
chr-1	31666172	31666182	MA0599.1	2.85e-05	-	210	PeakInsideFeature	HVAEP1_G000953
chr-1	31870389	31870404	MA0866.1	7.03e-05	-	23	Upstream	HVAEP1_G000963
chr-1	32226249	32226267	MA0051.1	1.15e-05	-	40	Upstream	HVAEP1_G000988
chr-1	32226250	32226271	MA0050.2	1.88e-05	+	42	Upstream	HVAEP1_G000988
chr-1	32226252	32226267	MA0517.1	1.31e-05	+	41	Upstream	HVAEP1_G000988
chr-1	32226254	32226268	MA0772.1	1.42e-05	-	43	Upstream	HVAEP1_G000988
chr-1	32226254	32226269	MA0653.1	1.23e-05	-	43	Upstream	HVAEP1_G000988
chr-1	32226282	32226290	MA1440.1	8.55e-05	-	68	Upstream	HVAEP1_G000988
chr-1	32226377	32226388	MA0060.3	4.16e-05	-	164	Upstream	HVAEP1_G000988
chr-1	32226377	32226388	MA1644.1	5.96e-05	-	164	Upstream	HVAEP1_G000988
chr-1	32226465	32226478	MA1583.1	8.57e-05	+	253	Upstream	HVAEP1_G000988
chr-1	32226467	32226484	MA1527.1	7.7e-05	+	257	Upstream	HVAEP1_G000988
chr-1	32226468	32226480	MA0243.1	7.46e-05	-	256	Upstream	HVAEP1_G000988
chr-1	32226469	32226481	MA1524.1	4.78e-05	+	257	Upstream	HVAEP1_G000988
chr-1	32226471	32226488	MA1541.1	3.97e-05	+	261	Upstream	HVAEP1_G000988
chr-1	32226497	32226512	MA0659.2	4.46e-05	-	286	Upstream	HVAEP1_G000988
chr-1	32226498	32226511	MA0842.2	6.38e-07	+	286	Upstream	HVAEP1_G000988
chr-1	32226499	32226511	MA0117.2	6.46e-06	+	287	Upstream	HVAEP1_G000988
chr-1	32226500	32226516	MA1126.1	4.77e-05	-	290	Upstream	HVAEP1_G000988
chr-1	32226502	32226515	MA0488.1	5.18e-05	+	290	Upstream	HVAEP1_G000988
chr-1	32226502	32226517	MA1145.1	1.49e-05	-	291	Upstream	HVAEP1_G000988
chr-1	32226503	32226514	MA1704.1	2.52e-05	+	290	Upstream	HVAEP1_G000988
chr-1	32226503	32226516	MA1632.1	8.51e-05	+	291	Upstream	HVAEP1_G000988
chr-1	32226503	32226517	MA0638.1	8.68e-05	-	292	Upstream	HVAEP1_G000988
chr-1	32226503	32226517	MA0834.1	2.71e-05	-	292	Upstream	HVAEP1_G000988
chr-1	32226503	32226517	MA1466.1	3.56e-05	+	292	Upstream	HVAEP1_G000988
chr-1	32226504	32226515	MA1127.1	2.81e-06	+	291	Upstream	HVAEP1_G000988
chr-1	32226504	32226515	MA1131.1	1.05e-05	+	291	Upstream	HVAEP1_G000988
chr-1	32226504	32226516	MA0605.2	1.21e-05	+	292	Upstream	HVAEP1_G000988
chr-1	32226504	32226516	MA0639.1	3.83e-05	+	292	Upstream	HVAEP1_G000988
chr-1	32226504	32226516	MA0656.1	7.89e-06	+	292	Upstream	HVAEP1_G000988
chr-1	32226504	32226516	MA0840.1	6.51e-06	+	292	Upstream	HVAEP1_G000988
chr-1	32226504	32226516	MA1133.1	2.88e-05	-	292	Upstream	HVAEP1_G000988
chr-1	32226504	32226516	MA1139.1	1.43e-05	-	292	Upstream	HVAEP1_G000988
chr-1	32226504	32226516	MA1140.2	1.79e-05	+	292	Upstream	HVAEP1_G000988
chr-1	32226504	32226516	MA1475.1	5.66e-06	-	292	Upstream	HVAEP1_G000988
chr-1	32226504	32226518	MA0844.1	2.13e-05	-	293	Upstream	HVAEP1_G000988
chr-1	32226505	32226513	MA0604.1	5.97e-05	+	291	Upstream	HVAEP1_G000988
chr-1	32226505	32226515	MA1129.1	3.83e-05	-	292	Upstream	HVAEP1_G000988
chr-1	32226505	32226515	MA1136.1	2.09e-05	-	292	Upstream	HVAEP1_G000988
chr-1	32226505	32226515	MA1143.1	1.23e-05	+	292	Upstream	HVAEP1_G000988
chr-1	32226505	32226516	MA1131.1	4.81e-05	-	292	Upstream	HVAEP1_G000988
chr-1	32226506	32226514	MA0862.1	9.08e-05	+	292	Upstream	HVAEP1_G000988
chr-1	32226506	32226517	MA1704.1	5.89e-05	-	293	Upstream	HVAEP1_G000988
chr-1	32448075	32448087	MA0809.2	3.7e-06	-	268	Upstream	HVAEP1_G000994
chr-1	32448273	32448283	MA0514.1	9.48e-06	-	71	Upstream	HVAEP1_G000994
chr-1	32448287	32448306	MA1101.2	7.65e-05	-	53	Upstream	HVAEP1_G000994
chr-1	32448289	32448302	MA1583.1	3.64e-05	+	54	Upstream	HVAEP1_G000994
chr-1	32448291	32448304	MA1583.1	6.32e-06	-	52	Upstream	HVAEP1_G000994
chr-1	32448294	32448302	MA0213.1	3.34e-05	+	51	Upstream	HVAEP1_G000994
chr-1	32448295	32448305	MA0603.1	5.58e-05	+	49	Upstream	HVAEP1_G000994
chr-1	32448295	32448305	MA1106.1	5.49e-06	-	49	Upstream	HVAEP1_G000994
chr-1	32448295	32448307	MA0822.1	2.47e-05	-	48	Upstream	HVAEP1_G000994
chr-1	32448296	32448306	MA0663.1	8.44e-05	+	48	Upstream	HVAEP1_G000994
chr-1	32448304	32448318	MA1485.1	2.79e-05	+	38	Upstream	HVAEP1_G000994
chr-1	32448305	32448318	MA1457.1	8.04e-05	-	38	Upstream	HVAEP1_G000994
chr-1	32448305	32448321	MA0743.2	5.21e-06	-	36	Upstream	HVAEP1_G000994
chr-1	32448305	32448321	MA0744.2	2.86e-06	-	36	Upstream	HVAEP1_G000994
chr-1	32448306	32448316	MA0665.1	8.73e-05	-	38	Upstream	HVAEP1_G000994
chr-1	32448306	32448318	MA0647.1	4.35e-05	+	37	Upstream	HVAEP1_G000994
chr-1	32448306	32448318	MA1105.2	1.95e-06	-	37	Upstream	HVAEP1_G000994
chr-1	32448306	32448319	MA1457.1	2.2e-05	+	37	Upstream	HVAEP1_G000994
chr-1	32448322	32448328	MA0260.1	9.71e-05	+	24	Upstream	HVAEP1_G000994
chr-1	32448332	32448352	MA0073.1	7.5e-06	-	7	OverlapStart	HVAEP1_G000994
chr-1	32448333	32448353	MA0073.1	8.08e-05	-	6	OverlapStart	HVAEP1_G000994
chr-1	32448340	32448355	MA0751.1	1.99e-05	-	2	OverlapStart	HVAEP1_G000994
chr-1	32448340	32448356	MA1584.1	1.55e-05	-	1	OverlapStart	HVAEP1_G000994
chr-1	32448341	32448351	MA0100.3	9.23e-05	-	3	OverlapStart	HVAEP1_G000994
chr-1	32448341	32448355	MA0696.1	5.62e-05	-	1	OverlapStart	HVAEP1_G000994
chr-1	32448341	32448355	MA0736.1	1.24e-05	-	1	OverlapStart	HVAEP1_G000994
chr-1	32448341	32448355	MA0737.1	5.18e-05	-	1	OverlapStart	HVAEP1_G000994
chr-1	32448341	32448356	MA0734.2	3.99e-05	-	1	OverlapStart	HVAEP1_G000994
chr-1	32448342	32448354	MA0039.4	5.42e-05	-	1	OverlapStart	HVAEP1_G000994
chr-1	32448342	32448356	MA1656.1	1.01e-05	-	0	OverlapStart	HVAEP1_G000994
chr-1	32448343	32448355	MA0456.1	5.21e-05	-	0	OverlapStart	HVAEP1_G000994
chr-1	32448343	32448357	MA1627.1	9.35e-05	-	1	OverlapStart	HVAEP1_G000994
chr-1	32448344	32448355	MA1630.1	4.1e-05	+	0	OverlapStart	HVAEP1_G000994
chr-1	32448344	32448357	MA0056.2	6.61e-07	-	1	OverlapStart	HVAEP1_G000994
chr-1	32448344	32448361	MA0631.1	5.98e-05	+	3	OverlapStart	HVAEP1_G000994
chr-1	32448348	32448366	MA1529.1	8.56e-05	+	8	OverlapStart	HVAEP1_G000994
chr-1	32448374	32448386	MA1444.1	9.79e-05	+	31	PeakInsideFeature	HVAEP1_G000994
chr-1	32469942	32469956	MA0509.2	2.9e-05	+	12003	Upstream	HVAEP1_G000995
chr-1	32469942	32469956	MA0798.2	3.3e-05	+	12003	Upstream	HVAEP1_G000995
chr-1	32469943	32469952	MA1554.1	1.69e-06	+	12005	Upstream	HVAEP1_G000995
chr-1	32470002	32470012	MA1601.1	3.78e-05	-	11945	Upstream	HVAEP1_G000995
chr-1	32470002	32470013	MA1630.1	8.53e-05	-	11945	Upstream	HVAEP1_G000995
chr-1	32470003	32470019	MA0088.2	3.32e-05	+	11941	Upstream	HVAEP1_G000995
chr-1	32470004	32470019	MA1640.1	7.85e-06	-	11941	Upstream	HVAEP1_G000995
chr-1	32470005	32470018	MA1113.2	2.05e-05	+	11941	Upstream	HVAEP1_G000995
chr-1	32481512	32481523	MA0593.1	9.91e-05	+	435	Upstream	HVAEP1_G000995
chr-1	32481513	32481524	MA0480.1	2.58e-05	-	434	Upstream	HVAEP1_G000995
chr-1	32481517	32481528	MA0686.1	5.97e-05	+	430	Upstream	HVAEP1_G000995
chr-1	32481517	32481528	MA0762.1	8.06e-05	+	430	Upstream	HVAEP1_G000995
chr-1	32481574	32481586	MA0456.1	1.8e-05	-	372	Upstream	HVAEP1_G000995
chr-1	32481574	32481588	MA0162.4	6.94e-05	-	371	Upstream	HVAEP1_G000995
chr-1	32481574	32481589	MA0535.1	2.42e-05	-	371	Upstream	HVAEP1_G000995
chr-1	32481575	32481587	MA0039.4	5.56e-05	-	371	Upstream	HVAEP1_G000995
chr-1	32481575	32481587	MA0694.1	4.56e-05	-	371	Upstream	HVAEP1_G000995
chr-1	32481575	32481587	MA0695.1	1.76e-05	-	371	Upstream	HVAEP1_G000995
chr-1	32481576	32481587	MA0506.1	2.09e-05	+	371	Upstream	HVAEP1_G000995
chr-1	32481576	32481587	MA0522.3	9.62e-05	-	371	Upstream	HVAEP1_G000995
chr-1	32481576	32481587	MA1648.1	7.73e-05	-	371	Upstream	HVAEP1_G000995
chr-1	32481576	32481590	MA0162.4	9.8e-05	-	369	Upstream	HVAEP1_G000995
chr-1	32481576	32481590	MA0162.4	9.8e-05	-	369	Upstream	HVAEP1_G000995
chr-1	32481576	32481590	MA1656.1	3.65e-05	-	369	Upstream	HVAEP1_G000995
chr-1	32481577	32481594	MA0615.1	6.97e-05	-	367	Upstream	HVAEP1_G000995
chr-1	32481578	32481590	MA0019.1	8.65e-05	-	368	Upstream	HVAEP1_G000995
chr-1	32481578	32481590	MA0131.2	2.36e-05	+	368	Upstream	HVAEP1_G000995
chr-1	32481578	32481590	MA0694.1	6.48e-05	-	368	Upstream	HVAEP1_G000995
chr-1	32481578	32481592	MA0162.4	1.49e-05	-	367	Upstream	HVAEP1_G000995
chr-1	32481578	32481592	MA0162.4	1.49e-05	-	367	Upstream	HVAEP1_G000995
chr-1	32481578	32481594	MA0864.2	7.54e-05	-	366	Upstream	HVAEP1_G000995
chr-1	32481579	32481589	MA1566.1	4.91e-05	+	368	Upstream	HVAEP1_G000995
chr-1	32481579	32481592	MA0753.2	7.47e-05	-	367	Upstream	HVAEP1_G000995
chr-1	32481580	32481590	MA0632.2	1.58e-05	-	367	Upstream	HVAEP1_G000995
chr-1	32481580	32481591	MA1513.1	3.35e-05	-	367	Upstream	HVAEP1_G000995
chr-1	32481580	32481591	MA1513.1	3.35e-05	-	367	Upstream	HVAEP1_G000995
chr-1	32481580	32481592	MA1650.1	8.66e-07	-	366	Upstream	HVAEP1_G000995
chr-1	32481581	32481591	MA0449.1	9.07e-05	-	366	Upstream	HVAEP1_G000995
chr-1	32481581	32481591	MA0616.2	6.93e-05	+	366	Upstream	HVAEP1_G000995
chr-1	32481582	32481593	MA1513.1	8.34e-05	-	365	Upstream	HVAEP1_G000995
chr-1	32481582	32481593	MA1513.1	8.34e-05	-	365	Upstream	HVAEP1_G000995
chr-1	32481600	32481614	MA0740.1	7.2e-05	-	345	Upstream	HVAEP1_G000995
chr-1	32481620	32481633	MA0114.4	3.74e-05	-	326	Upstream	HVAEP1_G000995
chr-1	32481620	32481633	MA0484.2	3.61e-05	-	326	Upstream	HVAEP1_G000995
chr-1	32481641	32481651	MA0098.3	5.15e-05	-	306	Upstream	HVAEP1_G000995
chr-1	32481641	32481651	MA0474.2	7.19e-05	-	306	Upstream	HVAEP1_G000995
chr-1	32481641	32481651	MA0475.2	5.6e-05	-	306	Upstream	HVAEP1_G000995
chr-1	32481641	32481651	MA0760.1	5.35e-05	-	306	Upstream	HVAEP1_G000995
chr-1	32481641	32481652	MA0762.1	1.22e-05	-	306	Upstream	HVAEP1_G000995
chr-1	32481641	32481653	MA1483.1	7.38e-05	-	305	Upstream	HVAEP1_G000995
chr-1	32481642	32481652	MA1484.1	7.68e-05	-	305	Upstream	HVAEP1_G000995
chr-1	32481642	32481654	MA1508.1	2.62e-05	-	304	Upstream	HVAEP1_G000995
chr-1	32481692	32481702	MA1497.1	1.76e-06	+	255	Upstream	HVAEP1_G000995
chr-1	32655544	32655561	MA0629.1	1.11e-05	-	298	Upstream	HVAEP1_G001004
chr-1	32655550	32655561	MA1648.1	9.12e-05	+	295	Upstream	HVAEP1_G001004
chr-1	32655551	32655562	MA0646.1	2.33e-05	-	294	Upstream	HVAEP1_G001004
chr-1	32655551	32655565	MA1485.1	7.02e-06	+	292	Upstream	HVAEP1_G001004
chr-1	32655553	32655561	MA0917.1	7.09e-05	-	293	Upstream	HVAEP1_G001004
chr-1	32655554	32655569	MA0538.1	6.67e-05	-	289	Upstream	HVAEP1_G001004
chr-1	33288569	33288581	MA0038.2	2.61e-05	+	69	PeakInsideFeature	HVAEP1_G001037
chr-1	33288570	33288581	MA0483.1	3.45e-05	+	69	PeakInsideFeature	HVAEP1_G001037
chr-1	33288577	33288592	MA0497.1	1.25e-05	+	60	PeakInsideFeature	HVAEP1_G001037
chr-1	33288578	33288593	MA0052.4	3.99e-05	+	59	PeakInsideFeature	HVAEP1_G001037
chr-1	33288663	33288677	MA1700.1	6.67e-05	+	26	Upstream	HVAEP1_G001037
chr-1	33306140	33306151	MA0035.4	1.82e-05	+	576	PeakInsideFeature	HVAEP1_G001038
chr-1	33306141	33306151	MA0891.1	9.27e-05	+	575	PeakInsideFeature	HVAEP1_G001038
chr-1	33306142	33306153	MA0467.1	5.56e-05	-	574	PeakInsideFeature	HVAEP1_G001038
chr-1	33306182	33306195	MA1457.1	8.29e-05	-	533	PeakInsideFeature	HVAEP1_G001038
chr-1	33306183	33306195	MA1105.2	7.33e-05	+	532	PeakInsideFeature	HVAEP1_G001038
chr-1	33306234	33306246	MA1462.1	1.43e-05	-	481	PeakInsideFeature	HVAEP1_G001038
chr-1	33306350	33306361	MA1515.1	4.59e-05	+	366	PeakInsideFeature	HVAEP1_G001038
chr-1	33306351	33306361	MA0767.1	4.87e-05	-	365	PeakInsideFeature	HVAEP1_G001038
chr-1	33306351	33306362	MA1513.1	6.45e-05	+	365	PeakInsideFeature	HVAEP1_G001038
chr-1	33306537	33306545	MA1563.1	9.32e-05	+	180	PeakInsideFeature	HVAEP1_G001038
chr-1	33306594	33306605	MA0480.1	5.1e-05	-	122	PeakInsideFeature	HVAEP1_G001038
chr-1	33306595	33306603	MA1440.1	8.55e-05	+	122	PeakInsideFeature	HVAEP1_G001038
chr-1	33306694	33306709	MA0751.1	6.05e-05	-	20	PeakInsideFeature	HVAEP1_G001038
chr-1	33306699	33306712	MA1615.1	5.1e-05	+	16	PeakInsideFeature	HVAEP1_G001038
chr-1	33306700	33306716	MA0735.1	7.98e-05	+	13	PeakInsideFeature	HVAEP1_G001038
chr-1	33306700	33306717	MA0851.1	6.37e-05	+	13	PeakInsideFeature	HVAEP1_G001038
chr-1	33306704	33306720	MA0088.2	4.72e-05	+	9	PeakInsideFeature	HVAEP1_G001038
chr-1	33306705	33306711	MA0130.1	9.71e-05	+	13	PeakInsideFeature	HVAEP1_G001038
chr-1	33306708	33306716	MA1563.1	1.83e-05	+	9	PeakInsideFeature	HVAEP1_G001038
chr-1	33306708	33306717	MA0078.1	9.88e-05	-	9	PeakInsideFeature	HVAEP1_G001038
chr-1	33306731	33306739	MA1153.1	9.52e-05	+	14	Upstream	HVAEP1_G001038
chr-1	33306748	33306759	MA0446.1	1.91e-05	+	32	Upstream	HVAEP1_G001038
chr-1	33306766	33306776	MA0895.1	2.71e-05	+	50	Upstream	HVAEP1_G001038
chr-1	33306788	33306803	MA1145.1	1.06e-05	-	74	Upstream	HVAEP1_G001038
chr-1	33306789	33306800	MA1704.1	1.58e-05	+	73	Upstream	HVAEP1_G001038
chr-1	33306789	33306802	MA1632.1	1.55e-05	+	74	Upstream	HVAEP1_G001038
chr-1	33306789	33306803	MA0833.2	3.57e-05	-	75	Upstream	HVAEP1_G001038
chr-1	33306789	33306803	MA0834.1	2.61e-06	+	75	Upstream	HVAEP1_G001038
chr-1	33306789	33306804	MA1145.1	3.49e-06	+	75	Upstream	HVAEP1_G001038
chr-1	33306790	33306801	MA1127.1	3e-06	+	74	Upstream	HVAEP1_G001038
chr-1	33306790	33306801	MA1131.1	1.16e-05	+	74	Upstream	HVAEP1_G001038
chr-1	33306790	33306802	MA0605.2	2.17e-06	-	75	Upstream	HVAEP1_G001038
chr-1	33306790	33306802	MA0656.1	1e-06	+	75	Upstream	HVAEP1_G001038
chr-1	33306790	33306803	MA1632.1	2.12e-05	-	75	Upstream	HVAEP1_G001038
chr-1	33306790	33306805	MA0492.1	7.6e-06	-	76	Upstream	HVAEP1_G001038
chr-1	33306790	33306806	MA1126.1	4.28e-06	+	77	Upstream	HVAEP1_G001038
chr-1	33306791	33306801	MA1143.1	5.77e-06	-	75	Upstream	HVAEP1_G001038
chr-1	33306791	33306802	MA1127.1	1.43e-05	-	75	Upstream	HVAEP1_G001038
chr-1	33306791	33306802	MA1131.1	3.27e-06	-	75	Upstream	HVAEP1_G001038
chr-1	33306791	33306804	MA0488.1	2.28e-05	-	76	Upstream	HVAEP1_G001038
chr-1	33306792	33306800	MA0862.1	9.08e-05	-	75	Upstream	HVAEP1_G001038
chr-1	33306792	33306802	MA1438.1	1.33e-05	-	76	Upstream	HVAEP1_G001038
chr-1	33306792	33306803	MA1704.1	2.01e-05	-	76	Upstream	HVAEP1_G001038
chr-1	33306793	33306801	MA0604.1	6.33e-06	-	76	Upstream	HVAEP1_G001038
chr-1	33883567	33883582	MA0768.1	1.79e-05	-	459	Upstream	HVAEP1_G001061
chr-1	33955651	33955668	MA0685.1	6.23e-05	+	16	Upstream	HVAEP1_G001065
chr-1	33955652	33955669	MA0516.2	7.75e-06	+	15	Upstream	HVAEP1_G001065
chr-1	33955652	33955669	MA0516.2	7.75e-06	+	15	Upstream	HVAEP1_G001065
chr-1	33955652	33955669	MA0516.2	7.75e-06	+	15	Upstream	HVAEP1_G001065
chr-1	33955652	33955669	MA0516.2	7.75e-06	+	15	Upstream	HVAEP1_G001065
chr-1	33955653	33955666	MA0753.2	1.96e-05	+	16	Upstream	HVAEP1_G001065
chr-1	33955653	33955666	MA0753.2	1.96e-05	+	16	Upstream	HVAEP1_G001065
chr-1	33955653	33955666	MA0753.2	1.96e-05	+	16	Upstream	HVAEP1_G001065
chr-1	33955653	33955667	MA0740.1	1.2e-05	+	15	Upstream	HVAEP1_G001065
chr-1	33955653	33955670	MA0685.1	5.69e-05	+	14	Upstream	HVAEP1_G001065
chr-1	33955653	33955670	MA0685.1	5.69e-05	+	14	Upstream	HVAEP1_G001065
chr-1	33955654	33955665	MA0741.1	7.35e-05	+	16	Upstream	HVAEP1_G001065
chr-1	33955654	33955665	MA0741.1	7.35e-05	+	16	Upstream	HVAEP1_G001065
chr-1	33955654	33955666	MA0694.1	8.26e-05	+	15	Upstream	HVAEP1_G001065
chr-1	33955654	33955666	MA0747.1	3.08e-05	+	15	Upstream	HVAEP1_G001065
chr-1	33955654	33955666	MA0747.1	3.08e-05	+	15	Upstream	HVAEP1_G001065
chr-1	33955654	33955666	MA1564.1	4.35e-05	+	15	Upstream	HVAEP1_G001065
chr-1	33955654	33955666	MA1564.1	4.35e-05	+	15	Upstream	HVAEP1_G001065
chr-1	33955654	33955666	MA1564.1	4.35e-05	+	15	Upstream	HVAEP1_G001065
chr-1	33955654	33955667	MA0753.2	7.74e-05	+	15	Upstream	HVAEP1_G001065
chr-1	33955654	33955667	MA0753.2	7.74e-05	+	15	Upstream	HVAEP1_G001065
chr-1	33955654	33955667	MA0753.2	7.74e-05	+	15	Upstream	HVAEP1_G001065
chr-1	33955654	33955667	MA0753.2	7.74e-05	+	15	Upstream	HVAEP1_G001065
chr-1	33955655	33955667	MA1564.1	4.06e-05	+	14	Upstream	HVAEP1_G001065
chr-1	33955655	33955667	MA1564.1	4.06e-05	+	14	Upstream	HVAEP1_G001065
chr-1	33955655	33955667	MA1564.1	4.06e-05	+	14	Upstream	HVAEP1_G001065
chr-1	33955655	33955668	MA0753.2	1.54e-05	+	14	Upstream	HVAEP1_G001065
chr-1	33955655	33955668	MA0753.2	1.54e-05	+	14	Upstream	HVAEP1_G001065
chr-1	33955655	33955668	MA0753.2	1.54e-05	+	14	Upstream	HVAEP1_G001065
chr-1	33955655	33955668	MA0753.2	1.54e-05	+	14	Upstream	HVAEP1_G001065
chr-1	33955655	33955668	MA0753.2	1.54e-05	+	14	Upstream	HVAEP1_G001065
chr-1	33955655	33955672	MA0516.2	4.81e-06	+	12	Upstream	HVAEP1_G001065
chr-1	33955655	33955672	MA0516.2	4.81e-06	+	12	Upstream	HVAEP1_G001065
chr-1	33955655	33955672	MA0516.2	4.81e-06	+	12	Upstream	HVAEP1_G001065
chr-1	33955656	33955667	MA0741.1	1.9e-05	+	14	Upstream	HVAEP1_G001065
chr-1	33955656	33955667	MA0741.1	1.9e-05	+	14	Upstream	HVAEP1_G001065
chr-1	33955656	33955668	MA0747.1	3.17e-05	+	13	Upstream	HVAEP1_G001065
chr-1	33955656	33955668	MA0747.1	3.17e-05	+	13	Upstream	HVAEP1_G001065
chr-1	33955656	33955668	MA1564.1	4.83e-05	+	13	Upstream	HVAEP1_G001065
chr-1	33955656	33955668	MA1564.1	4.83e-05	+	13	Upstream	HVAEP1_G001065
chr-1	33955656	33955668	MA1564.1	4.83e-05	+	13	Upstream	HVAEP1_G001065
chr-1	33955656	33955669	MA0753.2	4.07e-05	+	13	Upstream	HVAEP1_G001065
chr-1	33955656	33955669	MA0753.2	4.07e-05	+	13	Upstream	HVAEP1_G001065
chr-1	33955656	33955669	MA0753.2	4.07e-05	+	13	Upstream	HVAEP1_G001065
chr-1	33955656	33955669	MA0753.2	4.07e-05	+	13	Upstream	HVAEP1_G001065
chr-1	33955656	33955671	MA0697.1	9.63e-05	+	12	Upstream	HVAEP1_G001065
chr-1	33955656	33955671	MA0697.1	9.63e-05	+	12	Upstream	HVAEP1_G001065
chr-1	33955656	33955672	MA0733.1	5.66e-05	+	11	Upstream	HVAEP1_G001065
chr-1	33955656	33955672	MA0733.1	5.66e-05	+	11	Upstream	HVAEP1_G001065
chr-1	33955656	33955673	MA0685.1	7.2e-05	+	11	Upstream	HVAEP1_G001065
chr-1	33955657	33955667	MA0057.1	6.49e-07	-	13	Upstream	HVAEP1_G001065
chr-1	33955657	33955667	MA1578.1	9e-06	+	13	Upstream	HVAEP1_G001065
chr-1	33955657	33955667	MA1578.1	9e-06	+	13	Upstream	HVAEP1_G001065
chr-1	33955657	33955667	MA1578.1	9e-06	+	13	Upstream	HVAEP1_G001065
chr-1	33955657	33955670	MA0753.2	2.12e-05	+	12	Upstream	HVAEP1_G001065
chr-1	33955657	33955670	MA0753.2	2.12e-05	+	12	Upstream	HVAEP1_G001065
chr-1	33955657	33955670	MA0753.2	2.12e-05	+	12	Upstream	HVAEP1_G001065
chr-1	33955657	33955672	MA0697.1	6.96e-05	+	11	Upstream	HVAEP1_G001065
chr-1	33955657	33955672	MA0697.1	6.96e-05	+	11	Upstream	HVAEP1_G001065
chr-1	33955657	33955672	MA0697.1	6.96e-05	+	11	Upstream	HVAEP1_G001065
chr-1	33955658	33955668	MA1578.1	1.18e-06	+	12	Upstream	HVAEP1_G001065
chr-1	33955658	33955668	MA1578.1	1.18e-06	+	12	Upstream	HVAEP1_G001065
chr-1	33955658	33955668	MA1578.1	1.18e-06	+	12	Upstream	HVAEP1_G001065
chr-1	33955658	33955668	MA1578.1	1.18e-06	+	12	Upstream	HVAEP1_G001065
chr-1	33955658	33955669	MA1515.1	5.51e-05	+	12	Upstream	HVAEP1_G001065
chr-1	33955659	33955669	MA1578.1	1.78e-05	+	11	Upstream	HVAEP1_G001065
chr-1	33955659	33955669	MA1578.1	1.78e-05	+	11	Upstream	HVAEP1_G001065
chr-1	33955659	33955669	MA1578.1	1.78e-05	+	11	Upstream	HVAEP1_G001065
chr-1	33955659	33955669	MA1578.1	1.78e-05	+	11	Upstream	HVAEP1_G001065
chr-1	33955695	33955707	MA0528.2	2.9e-05	+	26	PeakInsideFeature	HVAEP1_G001065
chr-1	33955695	33955709	MA1627.1	8.68e-05	-	27	PeakInsideFeature	HVAEP1_G001065
chr-1	33955695	33955711	MA0733.1	4.65e-05	-	28	PeakInsideFeature	HVAEP1_G001065
chr-1	33955696	33955708	MA1653.1	5.47e-05	-	27	PeakInsideFeature	HVAEP1_G001065
chr-1	33955696	33955711	MA0732.1	7.82e-05	-	28	PeakInsideFeature	HVAEP1_G001065
chr-1	33955696	33955714	MA0657.1	5.4e-06	-	30	PeakInsideFeature	HVAEP1_G001065
chr-1	33955698	33955710	MA0131.2	6e-05	-	29	PeakInsideFeature	HVAEP1_G001065
chr-1	33955698	33955710	MA1655.1	9.22e-05	+	29	PeakInsideFeature	HVAEP1_G001065
chr-1	33955698	33955713	MA0742.1	1.01e-06	-	30	PeakInsideFeature	HVAEP1_G001065
chr-1	33955698	33955713	MA1514.1	4.79e-06	-	30	PeakInsideFeature	HVAEP1_G001065
chr-1	33955698	33955714	MA1107.2	6.6e-06	-	31	PeakInsideFeature	HVAEP1_G001065
chr-1	33955698	33955714	MA1546.1	7.7e-05	-	31	PeakInsideFeature	HVAEP1_G001065
chr-1	33955698	33955715	MA0685.1	1.4e-05	-	31	PeakInsideFeature	HVAEP1_G001065
chr-1	33955699	33955710	MA0741.1	3.51e-05	-	29	PeakInsideFeature	HVAEP1_G001065
chr-1	33955699	33955710	MA1511.1	6.09e-05	-	29	PeakInsideFeature	HVAEP1_G001065
chr-1	33955699	33955711	MA1653.1	2e-05	-	30	PeakInsideFeature	HVAEP1_G001065
chr-1	33955699	33955713	MA0740.1	1e-06	-	31	PeakInsideFeature	HVAEP1_G001065
chr-1	33955699	33955713	MA1700.1	6.15e-05	+	31	PeakInsideFeature	HVAEP1_G001065
chr-1	33955699	33955715	MA1599.1	1.74e-05	-	32	PeakInsideFeature	HVAEP1_G001065
chr-1	33955699	33955716	MA0516.2	4.77e-05	-	32	PeakInsideFeature	HVAEP1_G001065
chr-1	33955700	33955710	MA0443.1	8.77e-05	+	30	PeakInsideFeature	HVAEP1_G001065
chr-1	33955700	33955711	MA1522.1	7.18e-05	-	30	PeakInsideFeature	HVAEP1_G001065
chr-1	33955700	33955712	MA0747.1	8.24e-05	-	31	PeakInsideFeature	HVAEP1_G001065
chr-1	33955700	33955712	MA1564.1	2.27e-06	-	31	PeakInsideFeature	HVAEP1_G001065
chr-1	33955700	33955713	MA0746.2	4.01e-06	-	31	PeakInsideFeature	HVAEP1_G001065
chr-1	33955700	33955715	MA0079.4	4.85e-05	-	32	PeakInsideFeature	HVAEP1_G001065
chr-1	33955701	33955712	MA1512.1	3.57e-05	-	31	PeakInsideFeature	HVAEP1_G001065
chr-1	33955701	33955712	MA1513.1	6.69e-05	-	31	PeakInsideFeature	HVAEP1_G001065
chr-1	33955701	33955713	MA0821.1	7.25e-05	-	32	PeakInsideFeature	HVAEP1_G001065
chr-1	33955701	33955713	MA0822.1	8.27e-05	+	32	PeakInsideFeature	HVAEP1_G001065
chr-1	33955701	33955713	MA1474.1	5.68e-05	-	32	PeakInsideFeature	HVAEP1_G001065
chr-1	33955702	33955711	MA0450.1	5.01e-05	+	31	PeakInsideFeature	HVAEP1_G001065
chr-1	33955702	33955712	MA0449.1	6.11e-06	+	32	PeakInsideFeature	HVAEP1_G001065
chr-1	33955702	33955712	MA0616.2	1.7e-05	+	32	PeakInsideFeature	HVAEP1_G001065
chr-1	33955702	33955712	MA0649.1	4.55e-05	-	32	PeakInsideFeature	HVAEP1_G001065
chr-1	33955702	33955712	MA0823.1	3.94e-05	-	32	PeakInsideFeature	HVAEP1_G001065
chr-1	33955702	33955712	MA1099.2	5.33e-06	+	32	PeakInsideFeature	HVAEP1_G001065
chr-1	33955702	33955712	MA1566.1	8.25e-05	+	32	PeakInsideFeature	HVAEP1_G001065
chr-1	33955702	33955713	MA1515.1	8.38e-05	-	32	PeakInsideFeature	HVAEP1_G001065
chr-1	33955703	33955711	MA0259.1	9.94e-05	+	32	PeakInsideFeature	HVAEP1_G001065
chr-1	33955703	33955715	MA0014.3	3.64e-05	+	34	PeakInsideFeature	HVAEP1_G001065
chr-1	33955704	33955715	MA0161.2	9.19e-05	+	34	PeakInsideFeature	HVAEP1_G001065
chr-1	33955705	33955714	MA0738.1	4.2e-05	-	34	PeakInsideFeature	HVAEP1_G001065
chr-1	33955705	33955714	MA0739.1	2.03e-05	-	34	PeakInsideFeature	HVAEP1_G001065
chr-1	33955738	33955749	MA1460.1	2.66e-05	+	68	PeakInsideFeature	HVAEP1_G001065
chr-1	33955739	33955750	MA1460.1	1.99e-05	-	69	PeakInsideFeature	HVAEP1_G001065
chr-1	33955739	33955751	MA0747.1	7.63e-05	-	70	PeakInsideFeature	HVAEP1_G001065
chr-1	33955770	33955781	MA0264.1	8.63e-05	-	100	PeakInsideFeature	HVAEP1_G001065
chr-1	33955778	33955797	MA0139.1	9.76e-05	+	112	PeakInsideFeature	HVAEP1_G001065
chr-1	33955778	33955797	MA0139.1	9.76e-05	+	112	PeakInsideFeature	HVAEP1_G001065
chr-1	33955779	33955785	MA0130.1	9.71e-05	+	107	PeakInsideFeature	HVAEP1_G001065
chr-1	33955781	33955800	MA0139.1	1.01e-05	+	115	PeakInsideFeature	HVAEP1_G001065
chr-1	33955781	33955800	MA0139.1	1.01e-05	+	115	PeakInsideFeature	HVAEP1_G001065
chr-1	33955782	33955793	MA0871.2	8.08e-05	-	112	PeakInsideFeature	HVAEP1_G001065
chr-1	33955782	33955794	MA0147.3	1.85e-05	-	113	PeakInsideFeature	HVAEP1_G001065
chr-1	33955782	33955796	MA0696.1	9.47e-05	-	114	PeakInsideFeature	HVAEP1_G001065
chr-1	33955782	33955797	MA0697.1	6.58e-05	-	114	PeakInsideFeature	HVAEP1_G001065
chr-1	33955783	33955793	MA0825.1	8.64e-05	-	113	PeakInsideFeature	HVAEP1_G001065
chr-1	33960886	33960892	MA0006.1	6.72e-05	+	5214	PeakInsideFeature	HVAEP1_G001065
chr-1	33960888	33960896	MA0775.1	8.35e-05	-	5217	PeakInsideFeature	HVAEP1_G001065
chr-1	33960921	33960936	MA0142.1	6.23e-05	+	5253	PeakInsideFeature	HVAEP1_G001065
chr-1	33979576	33979584	MA0604.1	4.46e-05	+	13356	Upstream	HVAEP1_G001066
chr-1	33979698	33979706	MA0244.1	8.31e-05	+	13478	Upstream	HVAEP1_G001066
chr-1	33979743	33979754	MA0032.2	4.14e-05	-	13524	Upstream	HVAEP1_G001066
chr-1	33979743	33979754	MA0845.1	1.39e-05	-	13524	Upstream	HVAEP1_G001066
chr-1	34065731	34065746	MA1494.1	3.1e-05	-	18666	PeakInsideFeature	HVAEP1_G001067
chr-1	34065732	34065747	MA0065.2	7.71e-05	-	18665	PeakInsideFeature	HVAEP1_G001067
chr-1	34065732	34065747	MA0065.2	7.71e-05	-	18665	PeakInsideFeature	HVAEP1_G001067
chr-1	34065733	34065748	MA0065.2	4.03e-05	-	18664	PeakInsideFeature	HVAEP1_G001067
chr-1	34065733	34065748	MA0065.2	4.03e-05	-	18664	PeakInsideFeature	HVAEP1_G001067
chr-1	34065734	34065746	MA0502.2	4.18e-05	+	18664	PeakInsideFeature	HVAEP1_G001067
chr-1	34065738	34065748	MA1548.1	3.26e-05	+	18661	PeakInsideFeature	HVAEP1_G001067
chr-1	34065745	34065753	MA1440.1	8.55e-05	-	18655	PeakInsideFeature	HVAEP1_G001067
chr-1	34065753	34065763	MA1143.1	5.6e-05	-	18646	PeakInsideFeature	HVAEP1_G001067
chr-1	34065754	34065765	MA1704.1	7.1e-05	-	18645	PeakInsideFeature	HVAEP1_G001067
chr-1	34065755	34065763	MA0604.1	3.1e-05	-	18645	PeakInsideFeature	HVAEP1_G001067
chr-1	34065757	34065768	MA0143.4	6.86e-05	-	18642	PeakInsideFeature	HVAEP1_G001067
chr-1	34065757	34065768	MA1120.1	4.76e-05	-	18642	PeakInsideFeature	HVAEP1_G001067
chr-1	34065784	34065798	MA1627.1	7.66e-06	+	18613	PeakInsideFeature	HVAEP1_G001067
chr-1	34065785	34065797	MA1653.1	2.19e-05	+	18613	PeakInsideFeature	HVAEP1_G001067
chr-1	34065785	34065799	MA0814.2	8.6e-05	-	18612	PeakInsideFeature	HVAEP1_G001067
chr-1	34065786	34065797	MA0765.2	9.98e-05	+	18613	PeakInsideFeature	HVAEP1_G001067
chr-1	34065786	34065797	MA1630.1	4.07e-05	-	18613	PeakInsideFeature	HVAEP1_G001067
chr-1	34065786	34065798	MA0528.2	5.02e-06	-	18612	PeakInsideFeature	HVAEP1_G001067
chr-1	34065787	34065801	MA1627.1	8.01e-06	+	18610	PeakInsideFeature	HVAEP1_G001067
chr-1	34065789	34065800	MA1630.1	5.27e-06	-	18610	PeakInsideFeature	HVAEP1_G001067
chr-1	34066114	34066130	MA0735.1	9.09e-05	-	18282	PeakInsideFeature	HVAEP1_G001067
chr-1	34066116	34066127	MA1522.1	4.95e-05	-	18283	PeakInsideFeature	HVAEP1_G001067
chr-1	34066118	34066138	MA0073.1	7.16e-06	-	18276	PeakInsideFeature	HVAEP1_G001067
chr-1	34089214	34089228	MA0518.1	7.09e-05	-	4817	Upstream	HVAEP1_G001067
chr-1	34089216	34089227	MA0519.1	8.12e-05	+	4817	Upstream	HVAEP1_G001067
chr-1	34089217	34089228	MA0137.3	8.02e-05	-	4818	Upstream	HVAEP1_G001067
chr-1	34089318	34089331	MA0749.1	9.37e-05	-	4920	Upstream	HVAEP1_G001067
chr-1	34089319	34089332	MA0262.1	6.57e-05	-	4921	Upstream	HVAEP1_G001067
chr-1	34089320	34089334	MA0602.1	4.34e-06	-	4923	Upstream	HVAEP1_G001067
chr-1	34089329	34089338	MA0922.1	6.15e-05	+	4929	Upstream	HVAEP1_G001067
chr-1	34136560	34136570	MA0546.1	9.84e-05	-	333	PeakInsideFeature	HVAEP1_G001068
chr-1	34136680	34136693	MA0056.2	7.82e-05	-	212	PeakInsideFeature	HVAEP1_G001068
chr-1	34136682	34136693	MA1117.1	1.47e-06	-	211	PeakInsideFeature	HVAEP1_G001068
chr-1	34136688	34136700	MA1478.1	5.63e-05	+	204	PeakInsideFeature	HVAEP1_G001068
chr-1	34136710	34136729	MA0139.1	6.45e-05	-	179	PeakInsideFeature	HVAEP1_G001068
chr-1	34136715	34136728	MA0830.2	7.19e-05	-	177	PeakInsideFeature	HVAEP1_G001068
chr-1	34136715	34136729	MA0526.3	8.35e-05	+	176	PeakInsideFeature	HVAEP1_G001068
chr-1	34136715	34136729	MA0638.1	8.81e-05	-	176	PeakInsideFeature	HVAEP1_G001068
chr-1	34136715	34136729	MA0829.2	9.87e-05	-	176	PeakInsideFeature	HVAEP1_G001068
chr-1	34136715	34136729	MA0839.1	2.12e-05	-	176	PeakInsideFeature	HVAEP1_G001068
chr-1	34136715	34136729	MA1621.1	6.59e-05	-	176	PeakInsideFeature	HVAEP1_G001068
chr-1	34136715	34136730	MA0751.1	2.24e-05	-	176	PeakInsideFeature	HVAEP1_G001068
chr-1	34136715	34136731	MA1584.1	4.33e-05	-	175	PeakInsideFeature	HVAEP1_G001068
chr-1	34136716	34136726	MA0603.1	2.66e-05	+	177	PeakInsideFeature	HVAEP1_G001068
chr-1	34136716	34136726	MA0632.2	9.3e-05	-	177	PeakInsideFeature	HVAEP1_G001068
chr-1	34136716	34136726	MA1106.1	8.06e-05	-	177	PeakInsideFeature	HVAEP1_G001068
chr-1	34136716	34136727	MA0059.1	5.33e-07	+	177	PeakInsideFeature	HVAEP1_G001068
chr-1	34136716	34136727	MA0103.3	7.36e-05	-	177	PeakInsideFeature	HVAEP1_G001068
chr-1	34136716	34136727	MA0871.2	1.88e-05	-	177	PeakInsideFeature	HVAEP1_G001068
chr-1	34136716	34136728	MA0104.4	1.26e-07	+	176	PeakInsideFeature	HVAEP1_G001068
chr-1	34136716	34136728	MA0147.3	4.94e-07	+	176	PeakInsideFeature	HVAEP1_G001068
chr-1	34136716	34136729	MA0830.2	2.71e-05	+	176	PeakInsideFeature	HVAEP1_G001068
chr-1	34136716	34136729	MA1631.1	5.43e-05	+	176	PeakInsideFeature	HVAEP1_G001068
chr-1	34136716	34136730	MA0696.1	1.73e-05	-	175	PeakInsideFeature	HVAEP1_G001068
chr-1	34136716	34136730	MA0736.1	9.68e-05	-	175	PeakInsideFeature	HVAEP1_G001068
chr-1	34136717	34136725	MA0831.2	2.93e-05	-	177	PeakInsideFeature	HVAEP1_G001068
chr-1	34136717	34136726	MA0608.1	5.84e-05	+	177	PeakInsideFeature	HVAEP1_G001068
chr-1	34136717	34136727	MA0058.3	9.78e-07	+	176	PeakInsideFeature	HVAEP1_G001068
chr-1	34136717	34136727	MA0616.2	5.72e-05	-	176	PeakInsideFeature	HVAEP1_G001068
chr-1	34136717	34136727	MA0633.1	5.8e-05	+	176	PeakInsideFeature	HVAEP1_G001068
chr-1	34136717	34136727	MA0649.1	9.99e-05	+	176	PeakInsideFeature	HVAEP1_G001068
chr-1	34136717	34136727	MA0819.1	9.22e-06	+	176	PeakInsideFeature	HVAEP1_G001068
chr-1	34136717	34136727	MA0820.1	8.17e-06	-	176	PeakInsideFeature	HVAEP1_G001068
chr-1	34136717	34136727	MA0825.1	2.97e-06	-	176	PeakInsideFeature	HVAEP1_G001068
chr-1	34136717	34136727	MA0828.1	4.73e-05	+	176	PeakInsideFeature	HVAEP1_G001068
chr-1	34136717	34136727	MA1099.2	6.57e-05	-	176	PeakInsideFeature	HVAEP1_G001068
chr-1	34136717	34136727	MA1108.2	7.32e-05	-	176	PeakInsideFeature	HVAEP1_G001068
chr-1	34136717	34136727	MA1464.1	3.79e-05	+	176	PeakInsideFeature	HVAEP1_G001068
chr-1	34136717	34136727	MA1570.1	2.81e-07	+	176	PeakInsideFeature	HVAEP1_G001068
chr-1	34136717	34136728	MA0059.1	5.33e-07	-	176	PeakInsideFeature	HVAEP1_G001068
chr-1	34136717	34136728	MA0103.3	7.36e-05	+	176	PeakInsideFeature	HVAEP1_G001068
chr-1	34136717	34136728	MA0871.2	1.88e-05	+	176	PeakInsideFeature	HVAEP1_G001068
chr-1	34136718	34136726	MA0259.1	1.79e-05	+	176	PeakInsideFeature	HVAEP1_G001068
chr-1	34136718	34136726	MA0622.1	4.31e-06	-	176	PeakInsideFeature	HVAEP1_G001068
chr-1	34136718	34136727	MA0608.1	5.84e-05	-	176	PeakInsideFeature	HVAEP1_G001068
chr-1	34136718	34136728	MA0603.1	2.66e-05	-	175	PeakInsideFeature	HVAEP1_G001068
chr-1	34136718	34136728	MA0632.2	9.3e-05	+	175	PeakInsideFeature	HVAEP1_G001068
chr-1	34136718	34136728	MA1106.1	8.06e-05	+	175	PeakInsideFeature	HVAEP1_G001068
chr-1	34136719	34136727	MA0831.2	2.93e-05	+	175	PeakInsideFeature	HVAEP1_G001068
chr-1	34136721	34136733	MA0694.1	2.23e-05	-	171	PeakInsideFeature	HVAEP1_G001068
chr-1	34136721	34136733	MA0695.1	1.41e-05	-	171	PeakInsideFeature	HVAEP1_G001068
chr-1	34136723	34136732	MA0511.2	9.4e-05	-	171	PeakInsideFeature	HVAEP1_G001068
chr-1	34136735	34136752	MA0615.1	8.31e-05	-	155	PeakInsideFeature	HVAEP1_G001068
chr-1	34136739	34136749	MA0837.1	6.63e-05	+	154	PeakInsideFeature	HVAEP1_G001068
chr-1	34136739	34136749	MA0838.1	6.38e-05	+	154	PeakInsideFeature	HVAEP1_G001068
chr-1	34136742	34136757	MA1419.1	6.33e-05	+	149	PeakInsideFeature	HVAEP1_G001068
chr-1	34136743	34136756	MA1623.1	3.59e-05	+	149	PeakInsideFeature	HVAEP1_G001068
chr-1	34136744	34136756	MA1508.1	5.72e-05	+	148	PeakInsideFeature	HVAEP1_G001068
chr-1	34136781	34136795	MA1645.1	3.8e-05	-	110	PeakInsideFeature	HVAEP1_G001068
chr-1	34136874	34136886	MA1602.1	8.17e-05	+	18	PeakInsideFeature	HVAEP1_G001068
chr-1	34136876	34136889	MA1583.1	3.49e-05	+	16	PeakInsideFeature	HVAEP1_G001068
chr-1	34136876	34136891	MA0697.1	6.99e-06	-	15	PeakInsideFeature	HVAEP1_G001068
chr-1	34136876	34136891	MA0751.1	5.93e-06	-	15	PeakInsideFeature	HVAEP1_G001068
chr-1	34136876	34136892	MA0735.1	5.4e-05	-	14	PeakInsideFeature	HVAEP1_G001068
chr-1	34136876	34136892	MA1584.1	7.11e-06	-	14	PeakInsideFeature	HVAEP1_G001068
chr-1	34136877	34136889	MA0865.1	1.96e-05	-	15	PeakInsideFeature	HVAEP1_G001068
chr-1	34136877	34136890	MA0471.2	2.26e-05	+	15	PeakInsideFeature	HVAEP1_G001068
chr-1	34136877	34136891	MA0696.1	1.65e-05	-	14	PeakInsideFeature	HVAEP1_G001068
chr-1	34136877	34136891	MA0736.1	4.71e-07	-	14	PeakInsideFeature	HVAEP1_G001068
chr-1	34136877	34136891	MA0737.1	6.4e-07	-	14	PeakInsideFeature	HVAEP1_G001068
chr-1	34136877	34136891	MA1627.1	6.41e-06	-	14	PeakInsideFeature	HVAEP1_G001068
chr-1	34136877	34136892	MA0734.2	2.36e-05	-	14	PeakInsideFeature	HVAEP1_G001068
chr-1	34136877	34136892	MA1491.1	1.99e-05	-	14	PeakInsideFeature	HVAEP1_G001068
chr-1	34136878	34136889	MA1630.1	4.35e-06	+	15	PeakInsideFeature	HVAEP1_G001068
chr-1	34136878	34136891	MA1583.1	4.87e-05	-	14	PeakInsideFeature	HVAEP1_G001068
chr-1	34136879	34136889	MA1601.1	7.26e-05	+	14	PeakInsideFeature	HVAEP1_G001068
chr-1	34136879	34136890	MA1122.1	1.34e-05	+	14	PeakInsideFeature	HVAEP1_G001068
chr-1	34136879	34136891	MA0456.1	1.83e-05	-	13	PeakInsideFeature	HVAEP1_G001068
chr-1	34136879	34136891	MA0810.1	6.51e-05	-	13	PeakInsideFeature	HVAEP1_G001068
chr-1	34136879	34136893	MA0003.4	4.18e-05	-	12	PeakInsideFeature	HVAEP1_G001068
chr-1	34136879	34136893	MA0814.2	3.34e-05	+	12	PeakInsideFeature	HVAEP1_G001068
chr-1	34136880	34136889	MA0597.1	8.3e-06	-	14	PeakInsideFeature	HVAEP1_G001068
chr-1	34136880	34136891	MA0812.1	5.25e-05	-	13	PeakInsideFeature	HVAEP1_G001068
chr-1	34136880	34136891	MA1569.1	4.24e-05	-	13	PeakInsideFeature	HVAEP1_G001068
chr-1	34136880	34136892	MA0528.2	4.3e-05	+	12	PeakInsideFeature	HVAEP1_G001068
chr-1	34136880	34136895	MA0541.1	1.72e-05	+	11	PeakInsideFeature	HVAEP1_G001068
chr-1	34136881	34136893	MA1653.1	2.76e-05	-	11	PeakInsideFeature	HVAEP1_G001068
chr-1	34136881	34136894	MA0471.2	2.68e-05	+	11	PeakInsideFeature	HVAEP1_G001068
chr-1	34136910	34136928	MA1459.1	8.06e-05	+	21	Upstream	HVAEP1_G001068
chr-1	34248671	34248682	MA0002.2	2.69e-05	+	7	PeakInsideFeature	HVAEP1_G001075
chr-1	34248671	34248683	MA0684.2	6.27e-05	-	6	PeakInsideFeature	HVAEP1_G001075
chr-1	34248673	34248682	MA0511.2	8.86e-05	-	6	PeakInsideFeature	HVAEP1_G001075
chr-1	34248681	34248696	MA1616.1	6.54e-05	+	5	OverlapStart	HVAEP1_G001075
chr-1	34248685	34248697	MA0095.2	8.79e-05	+	8	Upstream	HVAEP1_G001075
chr-1	34248689	34248697	MA0244.1	9.95e-05	+	10	Upstream	HVAEP1_G001075
chr-1	34248699	34248716	MA1455.1	5.67e-05	-	24	Upstream	HVAEP1_G001075
chr-1	34248701	34248714	MA1603.1	4.97e-05	-	24	Upstream	HVAEP1_G001075
chr-1	34248707	34248715	MA1440.1	8.55e-05	-	28	Upstream	HVAEP1_G001075
chr-1	34248724	34248741	MA0897.1	8.31e-05	+	49	Upstream	HVAEP1_G001075
chr-1	34248745	34248760	MA0501.1	1.23e-05	-	69	Upstream	HVAEP1_G001075
chr-1	34248746	34248761	MA0530.1	2.34e-05	-	70	Upstream	HVAEP1_G001075
chr-1	34248748	34248763	MA1520.1	1.78e-07	+	72	Upstream	HVAEP1_G001075
chr-1	34248749	34248764	MA0496.3	3.28e-06	+	73	Upstream	HVAEP1_G001075
chr-1	34248754	34248766	MA0117.2	8.71e-05	-	77	Upstream	HVAEP1_G001075
chr-1	34248791	34248800	MA0511.2	0.0001	-	112	Upstream	HVAEP1_G001075
chr-1	34248793	34248811	MA0140.2	4.78e-05	-	119	Upstream	HVAEP1_G001075
chr-1	34248796	34248809	MA0842.2	8.71e-05	+	119	Upstream	HVAEP1_G001075
chr-1	34248797	34248810	MA0788.1	5.82e-05	+	120	Upstream	HVAEP1_G001075
chr-1	34248797	34248811	MA0784.1	7.28e-05	+	121	Upstream	HVAEP1_G001075
chr-1	34248802	34248812	MA0634.1	5.96e-05	-	124	Upstream	HVAEP1_G001075
chr-1	34248802	34248812	MA0642.1	5.05e-05	-	124	Upstream	HVAEP1_G001075
chr-1	34248802	34248812	MA0644.1	6.31e-05	-	124	Upstream	HVAEP1_G001075
chr-1	34248802	34248812	MA0662.1	5.9e-05	-	124	Upstream	HVAEP1_G001075
chr-1	34248802	34248813	MA0060.3	1.06e-06	-	124	Upstream	HVAEP1_G001075
chr-1	34248802	34248813	MA1644.1	9.96e-07	-	124	Upstream	HVAEP1_G001075
chr-1	34248803	34248811	MA0027.2	9.85e-05	-	124	Upstream	HVAEP1_G001075
chr-1	34248803	34248811	MA0611.1	6.33e-06	-	124	Upstream	HVAEP1_G001075
chr-1	34248803	34248811	MA0705.1	6.33e-06	-	124	Upstream	HVAEP1_G001075
chr-1	34248803	34248815	MA0502.2	4.22e-05	+	126	Upstream	HVAEP1_G001075
chr-1	34262484	34262496	MA0502.2	2.78e-05	+	204	PeakInsideFeature	HVAEP1_G001076
chr-1	34321368	34321382	MA1645.1	7.75e-05	-	12705	Upstream	HVAEP1_G001078
chr-1	34321370	34321381	MA0503.1	1.44e-05	-	12705	Upstream	HVAEP1_G001078
chr-1	34434166	34434183	MA0615.1	7.31e-05	+	1786	PeakInsideFeature	HVAEP1_G001083
chr-1	34434171	34434179	MA0604.1	5.97e-05	-	1785	PeakInsideFeature	HVAEP1_G001083
chr-1	34434187	34434201	MA0834.1	5.87e-06	-	1766	PeakInsideFeature	HVAEP1_G001083
chr-1	34434189	34434199	MA1136.1	4.43e-06	+	1766	PeakInsideFeature	HVAEP1_G001083
chr-1	34434189	34434199	MA1143.1	2.33e-06	-	1766	PeakInsideFeature	HVAEP1_G001083
chr-1	34434190	34434200	MA1438.1	4.55e-05	-	1765	PeakInsideFeature	HVAEP1_G001083
chr-1	34434190	34434201	MA1704.1	1.25e-05	-	1765	PeakInsideFeature	HVAEP1_G001083
chr-1	34434191	34434199	MA0604.1	3.1e-05	-	1765	PeakInsideFeature	HVAEP1_G001083
chr-1	34434212	34434226	MA0102.4	3.53e-05	+	1741	PeakInsideFeature	HVAEP1_G001083
chr-1	34434214	34434222	MA0244.1	8.31e-05	+	1742	PeakInsideFeature	HVAEP1_G001083
chr-1	34434251	34434259	MA0775.1	8.35e-05	+	1705	PeakInsideFeature	HVAEP1_G001083
chr-1	34435370	34435380	MA1480.1	4.35e-05	-	585	PeakInsideFeature	HVAEP1_G001083
chr-1	34435374	34435393	MA1573.1	6.14e-05	-	577	PeakInsideFeature	HVAEP1_G001083
chr-1	34435376	34435386	MA0475.2	9.15e-05	+	579	PeakInsideFeature	HVAEP1_G001083
chr-1	34435376	34435386	MA0760.1	2.61e-05	+	579	PeakInsideFeature	HVAEP1_G001083
chr-1	34435376	34435386	MA0763.1	6.76e-05	+	579	PeakInsideFeature	HVAEP1_G001083
chr-1	34435378	34435389	MA1647.1	7.07e-05	-	577	PeakInsideFeature	HVAEP1_G001083
chr-1	34435382	34435394	MA0694.1	5.32e-05	-	572	PeakInsideFeature	HVAEP1_G001083
chr-1	34435382	34435394	MA0695.1	4.56e-05	-	572	PeakInsideFeature	HVAEP1_G001083
chr-1	34435384	34435395	MA1561.1	4.64e-05	-	571	PeakInsideFeature	HVAEP1_G001083
chr-1	34435386	34435398	MA0544.1	4.99e-05	+	568	PeakInsideFeature	HVAEP1_G001083
chr-1	34435389	34435410	MA1643.1	3.42e-05	-	561	PeakInsideFeature	HVAEP1_G001083
chr-1	34435390	34435405	MA0697.1	7.07e-06	-	563	PeakInsideFeature	HVAEP1_G001083
chr-1	34435390	34435405	MA0751.1	1.18e-05	-	563	PeakInsideFeature	HVAEP1_G001083
chr-1	34435390	34435406	MA1584.1	4.83e-05	-	562	PeakInsideFeature	HVAEP1_G001083
chr-1	34435391	34435404	MA0471.2	2.2e-05	+	563	PeakInsideFeature	HVAEP1_G001083
chr-1	34435391	34435405	MA0696.1	2.32e-05	-	562	PeakInsideFeature	HVAEP1_G001083
chr-1	34435391	34435405	MA0736.1	3.11e-05	-	562	PeakInsideFeature	HVAEP1_G001083
chr-1	34435391	34435405	MA0737.1	5.84e-05	-	562	PeakInsideFeature	HVAEP1_G001083
chr-1	34435391	34435408	MA1527.1	5.03e-05	-	561	PeakInsideFeature	HVAEP1_G001083
chr-1	34435391	34435408	MA1528.1	9.97e-05	-	561	PeakInsideFeature	HVAEP1_G001083
chr-1	34435392	34435404	MA1508.1	9.74e-06	+	562	PeakInsideFeature	HVAEP1_G001083
chr-1	34435392	34435407	MA0598.3	3.75e-05	-	561	PeakInsideFeature	HVAEP1_G001083
chr-1	34435393	34435404	MA1122.1	4.7e-05	+	562	PeakInsideFeature	HVAEP1_G001083
chr-1	34435393	34435405	MA0456.1	4.69e-05	-	561	PeakInsideFeature	HVAEP1_G001083
chr-1	34435393	34435405	MA1462.1	5.22e-05	+	561	PeakInsideFeature	HVAEP1_G001083
chr-1	34435393	34435405	MA1483.1	9.49e-05	+	561	PeakInsideFeature	HVAEP1_G001083
chr-1	34435393	34435407	MA0062.3	1.61e-05	-	560	PeakInsideFeature	HVAEP1_G001083
chr-1	34435393	34435407	MA0119.1	4.54e-06	+	560	PeakInsideFeature	HVAEP1_G001083
chr-1	34435393	34435407	MA0473.3	3.84e-05	+	560	PeakInsideFeature	HVAEP1_G001083
chr-1	34435393	34435407	MA0761.2	1.01e-05	+	560	PeakInsideFeature	HVAEP1_G001083
chr-1	34435394	34435404	MA1484.1	1.27e-05	+	561	PeakInsideFeature	HVAEP1_G001083
chr-1	34435394	34435405	MA0136.2	3.42e-05	+	561	PeakInsideFeature	HVAEP1_G001083
chr-1	34435394	34435407	MA0750.2	9.7e-06	+	560	PeakInsideFeature	HVAEP1_G001083
chr-1	34435394	34435408	MA0640.2	4.18e-05	-	559	PeakInsideFeature	HVAEP1_G001083
chr-1	34435394	34435417	MA1654.1	4.8e-05	+	555	PeakInsideFeature	HVAEP1_G001083
chr-1	34435395	34435405	MA0028.2	6.52e-05	+	560	PeakInsideFeature	HVAEP1_G001083
chr-1	34435395	34435405	MA0098.3	2.26e-05	+	560	PeakInsideFeature	HVAEP1_G001083
chr-1	34435395	34435405	MA0156.2	4.54e-05	+	560	PeakInsideFeature	HVAEP1_G001083
chr-1	34435395	34435405	MA0474.2	2.28e-05	+	560	PeakInsideFeature	HVAEP1_G001083
chr-1	34435395	34435405	MA0475.2	4.07e-05	+	560	PeakInsideFeature	HVAEP1_G001083
chr-1	34435395	34435405	MA0645.1	7.12e-05	+	560	PeakInsideFeature	HVAEP1_G001083
chr-1	34435395	34435405	MA0759.1	5.11e-05	+	560	PeakInsideFeature	HVAEP1_G001083
chr-1	34435395	34435405	MA0760.1	3.4e-05	+	560	PeakInsideFeature	HVAEP1_G001083
chr-1	34435395	34435405	MA0764.2	1.88e-07	+	560	PeakInsideFeature	HVAEP1_G001083
chr-1	34435395	34435406	MA0076.2	6.08e-06	-	560	PeakInsideFeature	HVAEP1_G001083
chr-1	34435395	34435406	MA0765.2	1.98e-05	-	560	PeakInsideFeature	HVAEP1_G001083
chr-1	34435396	34435403	MA0026.1	4.85e-05	+	561	PeakInsideFeature	HVAEP1_G001083
chr-1	34435396	34435404	MA0916.1	9.81e-05	+	560	PeakInsideFeature	HVAEP1_G001083
chr-1	34435399	34435405	MA0260.1	4.85e-05	+	558	PeakInsideFeature	HVAEP1_G001083
chr-1	34435400	34435412	MA0465.2	4.93e-05	+	554	PeakInsideFeature	HVAEP1_G001083
chr-1	34435401	34435412	MA0216.2	7.42e-06	+	554	PeakInsideFeature	HVAEP1_G001083
chr-1	34435401	34435412	MA0650.2	4.65e-05	+	554	PeakInsideFeature	HVAEP1_G001083
chr-1	34435401	34435412	MA0878.2	1.83e-05	+	554	PeakInsideFeature	HVAEP1_G001083
chr-1	34435401	34435412	MA0899.1	3.92e-05	+	554	PeakInsideFeature	HVAEP1_G001083
chr-1	34435401	34435412	MA1473.1	2.22e-05	+	554	PeakInsideFeature	HVAEP1_G001083
chr-1	34435402	34435412	MA0913.2	7.08e-06	+	553	PeakInsideFeature	HVAEP1_G001083
chr-1	34435450	34435465	MA1487.1	8.81e-05	+	503	PeakInsideFeature	HVAEP1_G001083
chr-1	34435455	34435466	MA1561.1	9.77e-05	+	500	PeakInsideFeature	HVAEP1_G001083
chr-1	34435456	34435466	MA1562.1	6.7e-05	+	499	PeakInsideFeature	HVAEP1_G001083
chr-1	34435457	34435467	MA0515.1	7.74e-05	-	498	PeakInsideFeature	HVAEP1_G001083
chr-1	34435461	34435474	MA1124.1	2.03e-05	-	493	PeakInsideFeature	HVAEP1_G001083
chr-1	34435510	34435519	MA0253.1	6.8e-05	+	446	PeakInsideFeature	HVAEP1_G001083
chr-1	34435638	34435649	MA0508.3	1.08e-05	+	317	PeakInsideFeature	HVAEP1_G001083
chr-1	34435703	34435713	MA0514.1	5.52e-05	-	252	PeakInsideFeature	HVAEP1_G001083
chr-1	34435704	34435718	MA0237.2	7.75e-05	-	249	PeakInsideFeature	HVAEP1_G001083
chr-1	34435711	34435721	MA0838.1	1.44e-05	+	244	PeakInsideFeature	HVAEP1_G001083
chr-1	34435713	34435721	MA0244.1	3.54e-05	-	243	PeakInsideFeature	HVAEP1_G001083
chr-1	34435716	34435724	MA0611.1	4.56e-05	+	240	PeakInsideFeature	HVAEP1_G001083
chr-1	34435721	34435729	MA1440.1	8.55e-05	+	235	PeakInsideFeature	HVAEP1_G001083
chr-1	34435732	34435746	MA0740.1	4.95e-05	-	221	PeakInsideFeature	HVAEP1_G001083
chr-1	34435733	34435743	MA0443.1	1.78e-05	+	222	PeakInsideFeature	HVAEP1_G001083
chr-1	34435742	34435759	MA0897.1	2.74e-06	+	210	PeakInsideFeature	HVAEP1_G001083
chr-1	34435742	34435759	MA0898.1	1.74e-06	+	210	PeakInsideFeature	HVAEP1_G001083
chr-1	34435743	34435753	MA0754.1	1.4e-05	-	212	PeakInsideFeature	HVAEP1_G001083
chr-1	34435743	34435753	MA0755.1	3.03e-05	-	212	PeakInsideFeature	HVAEP1_G001083
chr-1	34435756	34435765	MA0619.1	9.33e-05	-	200	PeakInsideFeature	HVAEP1_G001083
chr-1	34435769	34435781	MA0070.1	8.4e-05	+	185	PeakInsideFeature	HVAEP1_G001083
chr-1	34435770	34435781	MA0060.3	2.28e-05	+	185	PeakInsideFeature	HVAEP1_G001083
chr-1	34435770	34435781	MA1644.1	3.1e-05	+	185	PeakInsideFeature	HVAEP1_G001083
chr-1	34435772	34435780	MA0611.1	2.91e-05	+	184	PeakInsideFeature	HVAEP1_G001083
chr-1	34435784	34435793	MA0078.1	2.9e-05	-	172	PeakInsideFeature	HVAEP1_G001083
chr-1	34435797	34435805	MA0244.1	8.31e-05	-	159	PeakInsideFeature	HVAEP1_G001083
chr-1	34435811	34435824	MA0018.4	1.32e-05	+	143	PeakInsideFeature	HVAEP1_G001083
chr-1	34435811	34435824	MA1632.1	3.98e-05	+	143	PeakInsideFeature	HVAEP1_G001083
chr-1	34435812	34435823	MA1127.1	9.13e-05	+	143	PeakInsideFeature	HVAEP1_G001083
chr-1	34435812	34435824	MA0656.1	9.78e-05	-	142	PeakInsideFeature	HVAEP1_G001083
chr-1	34435812	34435824	MA0840.1	9.81e-05	-	142	PeakInsideFeature	HVAEP1_G001083
chr-1	34435814	34435824	MA1438.1	5.14e-05	-	141	PeakInsideFeature	HVAEP1_G001083
chr-1	34435829	34435841	MA0502.2	7.55e-05	-	125	PeakInsideFeature	HVAEP1_G001083
chr-1	34435831	34435842	MA0060.3	5.88e-06	+	124	PeakInsideFeature	HVAEP1_G001083
chr-1	34435831	34435842	MA1644.1	1.11e-05	+	124	PeakInsideFeature	HVAEP1_G001083
chr-1	34435831	34435844	MA0771.1	3.85e-05	-	123	PeakInsideFeature	HVAEP1_G001083
chr-1	34435834	34435847	MA0749.1	5.25e-05	+	120	PeakInsideFeature	HVAEP1_G001083
chr-1	34435871	34435881	MA0443.1	9.36e-05	+	84	PeakInsideFeature	HVAEP1_G001083
chr-1	34435872	34435884	MA0794.1	8.6e-05	-	82	PeakInsideFeature	HVAEP1_G001083
chr-1	34435874	34435885	MA0467.1	5.22e-05	+	81	PeakInsideFeature	HVAEP1_G001083
chr-1	34435875	34435890	MA0505.1	9.93e-05	-	78	PeakInsideFeature	HVAEP1_G001083
chr-1	34435908	34435916	MA0614.1	5.92e-05	-	48	PeakInsideFeature	HVAEP1_G001083
chr-1	34435908	34435916	MA0920.1	9.85e-05	-	48	PeakInsideFeature	HVAEP1_G001083
chr-1	34435912	34435926	MA0901.2	7.44e-05	+	41	PeakInsideFeature	HVAEP1_G001083
chr-1	34435913	34435924	MA0216.2	4.88e-05	+	42	PeakInsideFeature	HVAEP1_G001083
chr-1	34435913	34435924	MA0909.2	6.54e-05	+	42	PeakInsideFeature	HVAEP1_G001083
chr-1	34435948	34435956	MA0222.1	4.56e-05	+	8	PeakInsideFeature	HVAEP1_G001083
chr-1	34435955	34435970	MA0079.4	4.73e-05	+	2	OverlapStart	HVAEP1_G001083
chr-1	34435955	34435972	MA0685.1	5.53e-05	+	3	OverlapStart	HVAEP1_G001083
chr-1	34435960	34435970	MA0443.1	8.33e-05	-	5	Upstream	HVAEP1_G001083
chr-1	34435960	34435975	MA0108.2	4.41e-05	-	7	Upstream	HVAEP1_G001083
chr-1	34435963	34435971	MA0011.1	4.28e-05	+	7	Upstream	HVAEP1_G001083
chr-1	34438421	34438431	MA0514.1	5.52e-05	-	2466	Upstream	HVAEP1_G001083
chr-1	34438494	34438505	MA0032.2	4.14e-05	+	2539	Upstream	HVAEP1_G001083
chr-1	34438494	34438505	MA0845.1	1.39e-05	+	2539	Upstream	HVAEP1_G001083
chr-1	34438539	34438554	MA0497.1	7.64e-05	+	2586	Upstream	HVAEP1_G001083
chr-1	34438540	34438555	MA0052.4	1.12e-05	+	2587	Upstream	HVAEP1_G001083
chr-1	34438553	34438567	MA0010.1	7.35e-06	-	2600	Upstream	HVAEP1_G001083
chr-1	34438557	34438568	MA0700.2	4.44e-05	+	2602	Upstream	HVAEP1_G001083
chr-1	34438558	34438566	MA0125.1	1.65e-05	-	2602	Upstream	HVAEP1_G001083
chr-1	34438558	34438568	MA0634.1	4.99e-05	+	2603	Upstream	HVAEP1_G001083
chr-1	34438558	34438568	MA0642.1	9.83e-05	+	2603	Upstream	HVAEP1_G001083
chr-1	34438558	34438568	MA0644.1	3.47e-05	+	2603	Upstream	HVAEP1_G001083
chr-1	34438558	34438568	MA0662.1	3.77e-05	+	2603	Upstream	HVAEP1_G001083
chr-1	34438558	34438568	MA0699.1	3.66e-05	+	2603	Upstream	HVAEP1_G001083
chr-1	34438558	34438568	MA0707.1	6.72e-05	+	2603	Upstream	HVAEP1_G001083
chr-1	34438558	34438568	MA0718.1	4.33e-05	+	2603	Upstream	HVAEP1_G001083
chr-1	34438558	34438568	MA0889.1	6.31e-05	+	2603	Upstream	HVAEP1_G001083
chr-1	34438558	34438568	MA0890.1	6.28e-05	+	2603	Upstream	HVAEP1_G001083
chr-1	34438558	34438568	MA0892.1	8.32e-05	+	2603	Upstream	HVAEP1_G001083
chr-1	34438558	34438568	MA0894.1	7.67e-05	-	2603	Upstream	HVAEP1_G001083
chr-1	34438559	34438567	MA0027.2	4.94e-05	+	2603	Upstream	HVAEP1_G001083
chr-1	34438559	34438567	MA0075.3	7.57e-05	+	2603	Upstream	HVAEP1_G001083
chr-1	34438559	34438567	MA0630.1	3.29e-05	-	2603	Upstream	HVAEP1_G001083
chr-1	34438559	34438567	MA0654.1	3.29e-05	+	2603	Upstream	HVAEP1_G001083
chr-1	34438559	34438567	MA0666.1	3.29e-05	+	2603	Upstream	HVAEP1_G001083
chr-1	34438559	34438567	MA0701.2	7.57e-05	+	2603	Upstream	HVAEP1_G001083
chr-1	34438559	34438567	MA0708.1	3.29e-05	+	2603	Upstream	HVAEP1_G001083
chr-1	34438559	34438567	MA0709.1	4.94e-05	+	2603	Upstream	HVAEP1_G001083
chr-1	34438559	34438567	MA0716.1	3.29e-05	+	2603	Upstream	HVAEP1_G001083
chr-1	34438559	34438567	MA0717.1	3.29e-05	+	2603	Upstream	HVAEP1_G001083
chr-1	34438559	34438567	MA0720.1	3.29e-05	+	2603	Upstream	HVAEP1_G001083
chr-1	34438559	34438567	MA0721.1	3.29e-05	+	2603	Upstream	HVAEP1_G001083
chr-1	34438559	34438567	MA0722.1	9.85e-05	+	2603	Upstream	HVAEP1_G001083
chr-1	34438559	34438567	MA0876.1	5.82e-05	+	2603	Upstream	HVAEP1_G001083
chr-1	34438559	34438567	MA0880.1	1.65e-05	+	2603	Upstream	HVAEP1_G001083
chr-1	34438559	34438567	MA0881.1	1.65e-05	+	2603	Upstream	HVAEP1_G001083
chr-1	34438559	34438567	MA0882.1	1.65e-05	+	2603	Upstream	HVAEP1_G001083
chr-1	34438559	34438567	MA0885.1	4.94e-05	+	2603	Upstream	HVAEP1_G001083
chr-1	34438559	34438567	MA1476.1	4.94e-05	+	2603	Upstream	HVAEP1_G001083
chr-1	34438559	34438567	MA1481.1	1.65e-05	+	2603	Upstream	HVAEP1_G001083
chr-1	34438559	34438567	MA1518.1	4.8e-05	+	2603	Upstream	HVAEP1_G001083
chr-1	34438559	34438567	MA1519.1	9.21e-05	+	2603	Upstream	HVAEP1_G001083
chr-1	34438559	34438567	MA1577.1	9.21e-05	+	2603	Upstream	HVAEP1_G001083
chr-1	34438586	34438601	MA0108.2	6.43e-05	+	2633	Upstream	HVAEP1_G001083
chr-1	34438592	34438606	MA0470.2	4.5e-05	-	2639	Upstream	HVAEP1_G001083
chr-1	34438593	34438605	MA0024.3	7.75e-05	+	2639	Upstream	HVAEP1_G001083
chr-1	34438593	34438610	MA0898.1	6e-05	+	2641	Upstream	HVAEP1_G001083
chr-1	34438594	34438602	MA0213.1	1.72e-06	+	2638	Upstream	HVAEP1_G001083
chr-1	34438601	34438615	MA0237.2	4.67e-05	-	2648	Upstream	HVAEP1_G001083
chr-1	34438617	34438632	MA0541.1	4.52e-05	-	2664	Upstream	HVAEP1_G001083
chr-1	34438617	34438633	MA0469.3	1.17e-05	-	2665	Upstream	HVAEP1_G001083
chr-1	34438617	34438634	MA0615.1	8.7e-05	+	2665	Upstream	HVAEP1_G001083
chr-1	34438676	34438687	MA1704.1	1.65e-05	+	2721	Upstream	HVAEP1_G001083
chr-1	34438676	34438690	MA1466.1	8.87e-05	+	2723	Upstream	HVAEP1_G001083
chr-1	34438677	34438687	MA1438.1	1.52e-05	+	2722	Upstream	HVAEP1_G001083
chr-1	34438677	34438688	MA1131.1	4.56e-06	+	2722	Upstream	HVAEP1_G001083
chr-1	34438677	34438689	MA1475.1	1.53e-05	-	2723	Upstream	HVAEP1_G001083
chr-1	34438678	34438686	MA0604.1	6.33e-06	+	2722	Upstream	HVAEP1_G001083
chr-1	34438678	34438688	MA1136.1	3.56e-06	-	2723	Upstream	HVAEP1_G001083
chr-1	34438678	34438688	MA1143.1	1.05e-06	+	2723	Upstream	HVAEP1_G001083
chr-1	34438693	34438703	MA0645.1	9.28e-05	+	2738	Upstream	HVAEP1_G001083
chr-1	34438693	34438703	MA0763.1	6.67e-05	+	2738	Upstream	HVAEP1_G001083
chr-1	34438693	34438704	MA0765.2	8.68e-05	-	2738	Upstream	HVAEP1_G001083
chr-1	34438710	34438721	MA0216.2	4.15e-05	+	2755	Upstream	HVAEP1_G001083
chr-1	34438710	34438721	MA0873.1	7.34e-05	+	2755	Upstream	HVAEP1_G001083
chr-1	34438710	34438721	MA0906.1	9.69e-05	+	2755	Upstream	HVAEP1_G001083
chr-1	34441664	34441675	MA0458.1	6.35e-06	-	5709	Upstream	HVAEP1_G001083
chr-1	34441711	34441732	MA0533.1	4.24e-05	+	5761	Upstream	HVAEP1_G001083
chr-1	34441718	34441728	MA0838.1	5.58e-05	+	5763	Upstream	HVAEP1_G001083
chr-1	34441727	34441743	MA1699.1	8.59e-05	-	5775	Upstream	HVAEP1_G001083
chr-1	34441769	34441777	MA1563.1	8.45e-05	-	5813	Upstream	HVAEP1_G001083
chr-1	34441775	34441788	MA0262.1	5.39e-05	+	5821	Upstream	HVAEP1_G001083
chr-1	34441782	34441794	MA1602.1	1.19e-05	-	5828	Upstream	HVAEP1_G001083
chr-1	34441801	34441813	MA0070.1	7.35e-05	-	5847	Upstream	HVAEP1_G001083
chr-1	34441801	34441814	MA1639.1	9.55e-05	-	5847	Upstream	HVAEP1_G001083
chr-1	34441802	34441817	MA0742.1	1.77e-05	-	5849	Upstream	HVAEP1_G001083
chr-1	34441803	34441817	MA0736.1	3.58e-05	-	5850	Upstream	HVAEP1_G001083
chr-1	34441803	34441817	MA0737.1	9.56e-05	-	5850	Upstream	HVAEP1_G001083
chr-1	34441804	34441816	MA1653.1	9.01e-05	-	5850	Upstream	HVAEP1_G001083
chr-1	34441804	34441819	MA0079.4	1.87e-05	-	5851	Upstream	HVAEP1_G001083
chr-1	34441804	34441820	MA1126.1	1.39e-05	-	5852	Upstream	HVAEP1_G001083
chr-1	34441805	34441816	MA1522.1	5.64e-05	-	5850	Upstream	HVAEP1_G001083
chr-1	34441805	34441817	MA0039.4	1.72e-05	-	5851	Upstream	HVAEP1_G001083
chr-1	34441806	34441817	MA1515.1	9.95e-05	-	5851	Upstream	HVAEP1_G001083
chr-1	34441806	34441818	MA0155.1	1.66e-06	+	5852	Upstream	HVAEP1_G001083
chr-1	34441806	34441822	MA0609.2	5.55e-05	-	5854	Upstream	HVAEP1_G001083
chr-1	34441807	34441817	MA0057.1	2.18e-05	+	5852	Upstream	HVAEP1_G001083
chr-1	34441807	34441820	MA0018.4	5.64e-05	+	5853	Upstream	HVAEP1_G001083
chr-1	34441807	34441820	MA1615.1	7.84e-06	+	5853	Upstream	HVAEP1_G001083
chr-1	34441807	34441820	MA1632.1	2.22e-05	+	5853	Upstream	HVAEP1_G001083
chr-1	34441807	34441821	MA0834.1	8.78e-05	+	5854	Upstream	HVAEP1_G001083
chr-1	34441807	34441822	MA1145.1	2.31e-05	+	5854	Upstream	HVAEP1_G001083
chr-1	34441808	34441819	MA1127.1	8.55e-05	+	5853	Upstream	HVAEP1_G001083
chr-1	34441808	34441819	MA1150.1	3.52e-05	+	5853	Upstream	HVAEP1_G001083
chr-1	34441808	34441820	MA1133.1	5.62e-05	-	5854	Upstream	HVAEP1_G001083
chr-1	34441808	34441823	MA0492.1	8.39e-05	-	5855	Upstream	HVAEP1_G001083
chr-1	34441808	34441824	MA1126.1	1.08e-05	+	5856	Upstream	HVAEP1_G001083
chr-1	34441808	34441826	MA1148.1	2.64e-05	+	5857	Upstream	HVAEP1_G001083
chr-1	34441808	34441826	MA1459.1	7.8e-05	+	5857	Upstream	HVAEP1_G001083
chr-1	34441809	34441819	MA1129.1	8.12e-05	+	5854	Upstream	HVAEP1_G001083
chr-1	34441809	34441819	MA1136.1	6.36e-05	-	5854	Upstream	HVAEP1_G001083
chr-1	34441809	34441819	MA1143.1	6.46e-05	-	5854	Upstream	HVAEP1_G001083
chr-1	34441809	34441820	MA1131.1	7.17e-05	-	5854	Upstream	HVAEP1_G001083
chr-1	34441809	34441822	MA0017.2	3.36e-05	+	5855	Upstream	HVAEP1_G001083
chr-1	34441810	34441819	MA1535.1	2.36e-06	+	5854	Upstream	HVAEP1_G001083
chr-1	34441810	34441825	MA0065.2	3.14e-05	+	5857	Upstream	HVAEP1_G001083
chr-1	34441810	34441826	MA1550.1	5.44e-06	+	5858	Upstream	HVAEP1_G001083
chr-1	34441810	34441827	MA0115.1	3.15e-05	+	5858	Upstream	HVAEP1_G001083
chr-1	34441811	34441819	MA0160.1	3.55e-05	+	5855	Upstream	HVAEP1_G001083
chr-1	34441811	34441819	MA1536.1	9.36e-07	+	5855	Upstream	HVAEP1_G001083
chr-1	34441811	34441821	MA0016.1	2.45e-07	+	5856	Upstream	HVAEP1_G001083
chr-1	34441811	34441823	MA0014.3	1.6e-05	-	5857	Upstream	HVAEP1_G001083
chr-1	34441811	34441825	MA0512.2	4.21e-06	+	5858	Upstream	HVAEP1_G001083
chr-1	34441811	34441825	MA0677.1	6.91e-06	+	5858	Upstream	HVAEP1_G001083
chr-1	34441811	34441825	MA0855.1	2.95e-06	+	5858	Upstream	HVAEP1_G001083
chr-1	34441811	34441825	MA0856.1	4.73e-06	+	5858	Upstream	HVAEP1_G001083
chr-1	34441811	34441826	MA1537.1	1.08e-05	+	5858	Upstream	HVAEP1_G001083
chr-1	34441811	34441826	MA1574.1	5.2e-06	+	5858	Upstream	HVAEP1_G001083
chr-1	34441816	34441826	MA0100.3	7.84e-05	-	5861	Upstream	HVAEP1_G001083
chr-1	34441835	34441849	MA1450.1	6.42e-06	+	5882	Upstream	HVAEP1_G001083
chr-1	34442674	34442692	MA0149.1	3.65e-05	-	6723	Upstream	HVAEP1_G001083
chr-1	34442676	34442687	MA1118.1	8.68e-05	-	6721	Upstream	HVAEP1_G001083
chr-1	34442682	34442695	MA0471.2	6.54e-05	-	6728	Upstream	HVAEP1_G001083
chr-1	34442684	34442695	MA0765.2	6.18e-05	+	6729	Upstream	HVAEP1_G001083
chr-1	34442685	34442695	MA0645.1	9.79e-05	-	6730	Upstream	HVAEP1_G001083
chr-1	34442685	34442695	MA1542.1	8.19e-05	+	6730	Upstream	HVAEP1_G001083
chr-1	34442685	34442696	MA0136.2	1.15e-05	-	6730	Upstream	HVAEP1_G001083
chr-1	34442685	34442697	MA0641.1	2.72e-05	-	6731	Upstream	HVAEP1_G001083
chr-1	34442685	34442697	MA1483.1	4.49e-05	-	6731	Upstream	HVAEP1_G001083
chr-1	34442687	34442694	MA0026.1	7.28e-05	-	6730	Upstream	HVAEP1_G001083
chr-1	34442744	34442758	MA0687.1	9.04e-05	+	6791	Upstream	HVAEP1_G001083
chr-1	34442745	34442757	MA1508.1	5.99e-06	+	6791	Upstream	HVAEP1_G001083
chr-1	34442745	34442760	MA0598.3	3.02e-05	-	6792	Upstream	HVAEP1_G001083
chr-1	34442746	34442758	MA0641.1	7.33e-05	+	6792	Upstream	HVAEP1_G001083
chr-1	34442746	34442758	MA1483.1	5.03e-05	+	6792	Upstream	HVAEP1_G001083
chr-1	34442746	34442760	MA0062.3	7.69e-05	-	6793	Upstream	HVAEP1_G001083
chr-1	34442746	34442760	MA0473.3	8.73e-05	+	6793	Upstream	HVAEP1_G001083
chr-1	34442746	34442760	MA0761.2	4.46e-05	+	6793	Upstream	HVAEP1_G001083
chr-1	34442747	34442757	MA1484.1	7.68e-05	+	6792	Upstream	HVAEP1_G001083
chr-1	34442747	34442758	MA0762.1	1.22e-05	+	6792	Upstream	HVAEP1_G001083
chr-1	34442748	34442758	MA0098.3	5.15e-05	+	6793	Upstream	HVAEP1_G001083
chr-1	34442748	34442758	MA0474.2	7.19e-05	+	6793	Upstream	HVAEP1_G001083
chr-1	34442748	34442758	MA0475.2	5.6e-05	+	6793	Upstream	HVAEP1_G001083
chr-1	34442748	34442758	MA0760.1	5.35e-05	+	6793	Upstream	HVAEP1_G001083
chr-1	34442832	34442844	MA0660.1	9.71e-05	+	6878	Upstream	HVAEP1_G001083
chr-1	34442959	34442974	MA0079.4	3.62e-05	+	7006	Upstream	HVAEP1_G001083
chr-1	34442959	34442976	MA0685.1	3.66e-05	+	7007	Upstream	HVAEP1_G001083
chr-1	34442961	34442975	MA0740.1	6.67e-05	+	7008	Upstream	HVAEP1_G001083
chr-1	34442962	34442973	MA0741.1	4.86e-05	+	7007	Upstream	HVAEP1_G001083
chr-1	34442962	34442973	MA1511.1	5.23e-05	+	7007	Upstream	HVAEP1_G001083
chr-1	34442962	34442973	MA1512.1	7.05e-05	+	7007	Upstream	HVAEP1_G001083
chr-1	34442962	34442976	MA1652.1	2.46e-05	-	7009	Upstream	HVAEP1_G001083
chr-1	34442964	34442975	MA1522.1	2.89e-05	+	7009	Upstream	HVAEP1_G001083
chr-1	34442964	34442976	MA1653.1	2.54e-05	+	7010	Upstream	HVAEP1_G001083
chr-1	34442966	34442978	MA0456.1	8.9e-05	+	7012	Upstream	HVAEP1_G001083
chr-1	34442995	34443005	MA1484.1	5.71e-05	+	7040	Upstream	HVAEP1_G001083
chr-1	34453296	34453312	MA0799.1	1.45e-05	+	26	Upstream	HVAEP1_G001084
chr-1	34453299	34453313	MA0509.2	1.26e-05	-	28	Upstream	HVAEP1_G001084
chr-1	34453299	34453313	MA0798.2	6.07e-06	-	28	Upstream	HVAEP1_G001084
chr-1	34564565	34564576	MA1110.1	4.72e-05	+	5105	Upstream	HVAEP1_G001086
chr-1	34564568	34564584	MA0859.1	1.12e-05	-	5099	Upstream	HVAEP1_G001086
chr-1	34564569	34564583	MA0855.1	9.27e-05	-	5099	Upstream	HVAEP1_G001086
chr-1	34564569	34564585	MA0857.1	1.59e-05	-	5098	Upstream	HVAEP1_G001086
chr-1	34568495	34568509	MA0901.2	5.42e-05	-	1173	Upstream	HVAEP1_G001086
chr-1	34642673	34642689	MA0799.1	4.27e-05	-	229	Upstream	HVAEP1_G001087
chr-1	34642673	34642690	MA0731.1	7.96e-05	+	229	Upstream	HVAEP1_G001087
chr-1	34642808	34642818	MA0626.1	9.73e-05	+	97	Upstream	HVAEP1_G001087
chr-1	34642808	34642818	MA0819.1	9.97e-05	-	97	Upstream	HVAEP1_G001087
chr-1	34642808	34642818	MA1493.1	6.16e-05	+	97	Upstream	HVAEP1_G001087
chr-1	34642835	34642847	MA0846.1	1.18e-05	-	69	Upstream	HVAEP1_G001087
chr-1	34642836	34642844	MA0614.1	5.92e-05	-	70	Upstream	HVAEP1_G001087
chr-1	34642836	34642844	MA0920.1	9.85e-05	-	70	Upstream	HVAEP1_G001087
chr-1	34642836	34642847	MA0032.2	3.86e-05	-	69	Upstream	HVAEP1_G001087
chr-1	34642836	34642847	MA0845.1	6.29e-05	-	69	Upstream	HVAEP1_G001087
chr-1	34642836	34642849	MA0847.2	7.58e-05	-	68	Upstream	HVAEP1_G001087
chr-1	34642837	34642847	MA0546.1	9.84e-05	-	68	Upstream	HVAEP1_G001087
chr-1	34642837	34642854	MA1455.1	3.23e-05	-	65	Upstream	HVAEP1_G001087
chr-1	34642839	34642852	MA1603.1	8.7e-05	-	65	Upstream	HVAEP1_G001087
chr-1	34642844	34642857	MA0262.1	7.48e-05	+	60	Upstream	HVAEP1_G001087
chr-1	34899961	34899976	MA0541.1	4.42e-05	-	25	Upstream	HVAEP1_G001093
chr-1	34899961	34899976	MA0541.1	4.42e-05	-	25	Upstream	HVAEP1_G001093
chr-1	34899963	34899978	MA0541.1	9.35e-05	-	23	Upstream	HVAEP1_G001093
chr-1	34899963	34899978	MA0541.1	9.35e-05	-	23	Upstream	HVAEP1_G001093
chr-1	34899963	34899979	MA0864.2	9.93e-05	+	22	Upstream	HVAEP1_G001093
chr-1	34899964	34899978	MA0470.2	6.63e-05	+	22	Upstream	HVAEP1_G001093
chr-1	34899965	34899976	MA1513.1	7e-05	-	23	Upstream	HVAEP1_G001093
chr-1	34899965	34899977	MA0024.3	5.99e-05	-	22	Upstream	HVAEP1_G001093
chr-1	35757353	35757363	MA0823.1	8.56e-05	-	2589	Upstream	HVAEP1_G001103
chr-1	35757353	35757363	MA1099.2	3.45e-05	+	2589	Upstream	HVAEP1_G001103
chr-1	35757353	35757363	MA1099.2	3.45e-05	+	2589	Upstream	HVAEP1_G001103
chr-1	35757355	35757365	MA0819.1	5.31e-05	+	2591	Upstream	HVAEP1_G001103
chr-1	35757355	35757365	MA0823.1	1.59e-05	-	2591	Upstream	HVAEP1_G001103
chr-1	35757355	35757365	MA1099.2	8.97e-06	+	2591	Upstream	HVAEP1_G001103
chr-1	35757355	35757365	MA1099.2	8.97e-06	+	2591	Upstream	HVAEP1_G001103
chr-1	35757595	35757608	MA1113.2	9.1e-05	+	2832	Upstream	HVAEP1_G001103
chr-1	35757688	35757704	MA0463.2	7.18e-05	-	2927	Upstream	HVAEP1_G001103
chr-1	35757722	35757734	MA1444.1	2.4e-06	-	2959	Upstream	HVAEP1_G001103
chr-1	35757859	35757873	MA1607.1	4.31e-05	+	3097	Upstream	HVAEP1_G001103
chr-1	35757861	35757871	MA0546.1	4.99e-05	+	3097	Upstream	HVAEP1_G001103
chr-1	35757861	35757872	MA0032.2	9.74e-05	+	3097	Upstream	HVAEP1_G001103
chr-1	35757861	35757873	MA0846.1	3.93e-05	+	3098	Upstream	HVAEP1_G001103
chr-1	35757862	35757873	MA0047.3	3.96e-05	+	3098	Upstream	HVAEP1_G001103
chr-1	35757862	35757873	MA0481.3	3.26e-05	+	3098	Upstream	HVAEP1_G001103
chr-1	35757862	35757873	MA0593.1	2.43e-05	+	3098	Upstream	HVAEP1_G001103
chr-1	35757862	35757873	MA1103.2	5.59e-05	+	3098	Upstream	HVAEP1_G001103
chr-1	35757862	35757873	MA1606.1	4.38e-05	+	3098	Upstream	HVAEP1_G001103
chr-1	35757862	35757873	MA1683.1	3.52e-05	+	3098	Upstream	HVAEP1_G001103
chr-1	35757862	35757874	MA0148.4	8.64e-05	+	3099	Upstream	HVAEP1_G001103
chr-1	35757863	35757874	MA0480.1	5.65e-05	-	3099	Upstream	HVAEP1_G001103
chr-1	35757864	35757872	MA0031.1	5.92e-05	+	3099	Upstream	HVAEP1_G001103
chr-1	35757864	35757872	MA0614.1	9.21e-05	+	3099	Upstream	HVAEP1_G001103
chr-1	35757864	35757872	MA0920.1	7.57e-05	+	3099	Upstream	HVAEP1_G001103
chr-1	35758092	35758102	MA0669.1	7.69e-05	-	3328	Upstream	HVAEP1_G001103
chr-1	35830936	35830944	MA0222.1	4.56e-05	+	3	OverlapStart	HVAEP1_G001105
chr-1	35830940	35830951	MA1511.1	6.01e-05	+	8	Upstream	HVAEP1_G001105
chr-1	35830965	35830976	MA0545.1	1.35e-05	+	33	Upstream	HVAEP1_G001105
chr-1	35830966	35830976	MA0100.3	6.8e-05	-	34	Upstream	HVAEP1_G001105
chr-1	35830999	35831011	MA0041.1	4.59e-06	-	68	Upstream	HVAEP1_G001105
chr-1	35831020	35831033	MA1632.1	7.1e-05	+	89	Upstream	HVAEP1_G001105
chr-1	35831021	35831033	MA0656.1	3.43e-05	+	90	Upstream	HVAEP1_G001105
chr-1	35831021	35831033	MA1139.1	6.65e-05	-	90	Upstream	HVAEP1_G001105
chr-1	35831021	35831033	MA1140.2	8.16e-05	+	90	Upstream	HVAEP1_G001105
chr-1	35831022	35831033	MA1131.1	7.59e-05	-	90	Upstream	HVAEP1_G001105
chr-1	35831027	35831042	MA0497.1	7.25e-05	+	97	Upstream	HVAEP1_G001105
chr-1	35831047	35831057	MA0443.1	8.02e-05	-	115	Upstream	HVAEP1_G001105
chr-1	35831112	35831123	MA0076.2	4.37e-05	+	180	Upstream	HVAEP1_G001105
chr-1	35831113	35831123	MA0028.2	9.33e-05	-	181	Upstream	HVAEP1_G001105
chr-1	35831113	35831123	MA0098.3	6.17e-05	-	181	Upstream	HVAEP1_G001105
chr-1	35831113	35831123	MA0156.2	7.2e-05	-	181	Upstream	HVAEP1_G001105
chr-1	35831113	35831123	MA0475.2	4.84e-05	-	181	Upstream	HVAEP1_G001105
chr-1	35831113	35831123	MA0625.1	6.27e-05	+	181	Upstream	HVAEP1_G001105
chr-1	35831113	35831123	MA0759.1	7.89e-05	-	181	Upstream	HVAEP1_G001105
chr-1	35831113	35831124	MA0762.1	2.41e-05	-	181	Upstream	HVAEP1_G001105
chr-1	35831113	35831125	MA1483.1	3.89e-05	-	182	Upstream	HVAEP1_G001105
chr-1	35831115	35831122	MA0026.1	2.43e-05	-	181	Upstream	HVAEP1_G001105
chr-1	35864693	35864704	MA0700.2	1.4e-05	+	118	Upstream	HVAEP1_G001106
chr-1	35864694	35864704	MA0634.1	9.52e-07	+	117	Upstream	HVAEP1_G001106
chr-1	35864694	35864704	MA0662.1	1.27e-06	+	117	Upstream	HVAEP1_G001106
chr-1	35864694	35864704	MA0699.1	1.27e-06	+	117	Upstream	HVAEP1_G001106
chr-1	35864695	35864703	MA0027.2	1.65e-05	+	117	Upstream	HVAEP1_G001106
chr-1	35864695	35864703	MA0075.3	1.65e-05	+	117	Upstream	HVAEP1_G001106
chr-1	35864695	35864703	MA0132.2	4.56e-05	+	117	Upstream	HVAEP1_G001106
chr-1	35864695	35864703	MA0630.1	1.65e-05	-	117	Upstream	HVAEP1_G001106
chr-1	35864695	35864703	MA0654.1	1.65e-05	+	117	Upstream	HVAEP1_G001106
[truncated: 208,123+ more rows]

## Sheet: Legend
Supplemental Data S5. Genome coordinates for all predicted motif instances in the AEP genome that were conserved in at least two other non-AEP Hydra genomes. The format is identical to the coordinate files in Supplemental Data S3.
