# Supplementary material for: A chromosome-scale epigenetic map of the Hydra genome reveals conserved regulators of cell state
Source: HighWire-hosted journal article supplement (doi:10.1101/gr.277040.122), 2023-01-13
Supplement: Supplemental_Data_S6.xlsx [file Supplemental_Data_S6.xlsx]

## Sheet: CAP-H2
Sequence Name	AA Sequence
A_millepora_amil.1.2.2863.m1	LGSRIMPSQASSSDSNDLASKYSHLLQPIRDLTKNWDIDVAAQLEEYLAEIERIKISFDGGKTSMNFAEAALVIQGSACIYSKKVEYLYTLVYQTLDLIASKKRLQQASSVDDQGKDNDASFKDNSEEFLLLDDIKEAKNIDLKEDEGNFLKEGSQIIPRTPLVLLPLGEKDKEDPLLSRTGEVLGSRNDFKMNTCRVHSSGTLLLDLAHLPLLDRSFKQMTLAAVCNPKDQQLASDVQTTDPDLASAGNFDSVDLPEHDDGFDAPESMYNVPGDDEESLGQVVENDQEEQEERIALRARVVTPQQTTNKLPVKDPWKLLDPYDPGLSKDRPYKKGKPFKKPSSLVSQQHKKKRKREEIKKVPSLIPINQFISQAFYSHASKMVKNPLKTPAFPEFEYL…
A_millepora_amil.1.2.2866.m1	MPSQASSSDSNDLASKYSHLLQPIRDLTKNWDIDVAAQLEEYLAEIERIKISFDGGKTSSKYIHISPRQVVIYDGRQREKTTENQMRKNCEKE
A_queenslandica_Aqu2121168	MAEKDIISRFGHLLKPIRDLAKNWDVDVASELEEYLLELEEITIAFEGGKANLNFAEAALVIQGSACVYSRKVEYLHALVYQTLELIVNKKRTEVEEQEGEQDITKSNEDQFPLLDDILEARNIDMIEKPFVPDINASIIQRTPMSLLPLHNSEKLLDVPLFNNKGELVGSRTDFKLNTSYISDNGALLLEPIKFTTFHGNCSLPLDSMHLLDNWAEPGGVASDDAVMDLSFHDNTILDAPPTDTINKDVSPPISRRRKSSDKSQRKGKQFGKLKLLDPHKPSKKDKPFKKGSTVLPSKDKAGSRKRKDSDSLLSPSQPLSEFLFQSIYSNSSQFPSNTLERPSSAEFEEQYWSETKRRKSAKKRIEDKVRGTLASQGEEEEEEDHSEGDERDNDDISV…
A_queenslandica_Aqu2102456	MAERDIISRFGHLLKPIRDLAKNWDVDVASELEEYLLELEEITIAFEGGKANLNFAEAALVIQGSACVYSRKVEYLHALVYQTLELIVNKKYVID
A_queenslandica_Aqu2110651	MAEKDIISRFGHLLKPIRDLAKNWDVDVASELEEYLLELEEITIAFEGGKANLNFAEAALVIQGSACVYSRKVEYLHALVYQTLELIVNKKRTEVEEQEGEQDITKSNEDQFPLLDDILEARNIDMIEKPFMPDINASIIQRTPRSLLPLHNSEKLLDVPLFNNKGELVGSRADFKLNTSYISDNGALLLEPIKFTTFHGNCSLPLDSMHLLDNWAEPGGVASDDAVMDLSFHDNTILDAPPTDTINKDISPPISRRRKSSDKSQRKGKQFGKLKLLDPHKPSKKDKPFKK
Aurelia_Seg14457	MRSKSAPNRAVWPKSANMREEGVERLSWLLKPIRDLNENWNIQLAEELEKYHEEIEGVQISFDGGKTTLNFAEAAMLIQGSACVYSKKVEYLYSLTHSTLQIVSNKQAMQQAPSVDDQGTDSDTTFNQHADQDKLLDLDDIEESDNIELKNDTEEHLSSEGARIIPRIPFALMPKSKMDKRGEDVLLNQKGEVIGNRNDFKMNTCILHSSGALLMDINSVPLLEKSIANRTGSTPKPPNREAMADKDINAEMEVDAGNASFDDPGIGGLSYDDDDDNQPNAPSFNDIPNAPSSPINSHHENEGPNLRLREYQRRAQEIENAGKQANWEDPWEELDLYEGKTHLEKPFKKGRPFKIPQSLKELLTKQKGRKRKNRPIRFGLSIPVCPIVEFCGNSLINKS…
B_lanceolatum_BL08105	MTLSQDPNAVDKRFAHLLQPIKDLTKNWDVNLAAELENYLEELNTIPFSFDGGVSTMNFVEAALLIQGSACVYSRKVELLYTLVYQSLEMLASKKRQKQGSSLDEDGQDKDAPASKAWEEPEFLSLDDDNQLRPKRSIELKPDQNKNVVIVQRVPMALTPLEEGEKKNAELVSKKGETLGSRLDFTVNFALLHSPDTLMLDRSNCSKLNLTEDTRWITPGAGLEAAPGTEILPPPPDLPMNTSVCSDDGGAEPLPLGDDADMDDVGGGDVGGGDLEWDNPERNAASEPRNLRPRVQVVEPKEQVQKDPWKLLDPHEEQPTNAKSLPFKKGVAFQVLPGLSGTTKKRKLKAASAQLEPLPDLISKTVWGDKKLPTNPTKRPTFAALEHLYWDAMRKRREL…
B_mori_BGIBMGA011262	MSLLEEYLTEAGALEAGERVPNFAELALVLQHSACVYGRKVDFLYQHVLSVSDSLQHSTQDDAPPDQLSHDKRRRRASAASGDFVLIDLEPCPGASREPDARVPPTLPTALWERPLVDYRGEPIGLPADFYVTWRLQNGLLVDELVSPSGTEPLRPISLAELQAAILGLPSPVRTSTPLMLEAPPLEPPPITPVVAKNERKRRNDVHIEDIAEGSLRLVISNELGARLAEVEEFGWVSRRRKLRLLHQRHKSRKEEEDFTGFWSRPPAAALPATPALPPPRTAEDSDDDGFFEQSSLGDSDSSRLDEEQRHGALDVRGVAARVLAACGPRALPADALLGRRPQDVSTVLLATLFLANAGNVEIIQGPPLSVNSFSVRLLSTDHTLYAATQLDLDKISR
C_elegans_WBGene00016202_kle2	MTRNAPPGQESTDLAWLVTPAKDLVENFSIDVLKALAGYLEVIRDTDNQVDAATTLFDFQRACRIIQGSCAVYGRKVDHVYELTISVVDLVENKGQDDGNTGSRRGAGRRKNFNLGSTNYDLADIDSLKQEALANFEKTVKEEKKSIDAVRMVPTQFMFYGQLNRTDEQILNAKSDVIGKVKDFEIKKSKVKHDQQILYSHDCYRGVELDEQEHEKISAYGPFKDPLSGREEQEAVRQNQEIQSRATSRGSQPTRLSQPFSNHLNDFLSFVEGRVNKNRPSTHLTTGLVDMFVDNMQNDEPNTSRRPDENYAPMDFDDDFGGGDDDDDDYIRNLSRRDEKAPAPWDELDKNHIIWLPVVSKPVKKITKFQPKPAEMLARKQRREEKINKSRRDEFMETH…
C_intestinalis_ENSCING00000017626	MGDLNHQRFEFLLHPIKDLTKNWNINIANVLEDYLTELEKMTFSFDGGKTTLNFAEASLMIQGTACVWGRKVEYLHSLVYQTLELIRNNKKNTHHDTNEDQTNQTRVCGETEDQFLNMDNLNETPKEAPHPDDVPLLGLCFLGGPDVDNRGTPFKNTQGEVFNYYNDFWANQSTPNTEGRALLEQPNKLSNNVVQLQTIHALEAHNVDVTGDLPDVSCHSGNDDVINDNDDVINDVTIQPEQPVNDVIEEIVSRQVEVRQLRQRFKPTTPVDTPIVNPPPSQPMLDPHTPCPSLWQPKPFKKGNCSRLPSGVSTGKKRKKAGCHDNDASMLGEFMEDMKTEEIEKKRRMLCWRGLREKQIQNKRKHKILNKIKIPVSLVDEVFATSFHDDHNDDDGCHG…
C_milii_ENSCMIG00000014561_NCAPH2	MEDIESRFTHLLQPIRELTKNWEIDVAAQLGEYLEELDQICISFDDGKTTMNFAEAALLIQGSACIYSKKVEYLYSLVYQALDFISNKKRRQQPASIGAEGLDTDVSVADANREGGFLSLDDIQLPTRNTIDLRTDHTPNMVNVIPLTPMALVPPNDVEKKNNPLLSHRGEVLASRKDFRMNTCTPHTTGAFLLELTGLSPMSYLSRALENTHLATAVQGDYPQEVHMETRGCEVAIPPLDLSNQGSPEGGAGFLPAEGEEAEQSPERVMSHKAEGLRDGVPDSGGREVLDPWRSLDPFEATENKVLRKGKHYVIPARVPHTGNKRKRKCSVTLLEFGKWFSRAHYGGADFVKLKRTGLSHADLEVLHWKHMKERAAAQRIFRKRMSVLCGWVIDELEN…
C_xamachana_jgi.Casxa1.14211	MQQKYGPRDHYNMTGSVGIEETERPEWLLKQVRDLTENWEIPLGDELEKYLDQLEQVEISFDNGKSTLNFVEAALLIQGSACVYSKKVEYLYSLAVATLDILASRKKQQQASSIDEQGKDKDTTFDEHAEDDDLLDLDDIKESDNIELRNEIERHENVKIIPRIPFALMPKSDMNRKGDDVLLNQKGEIIGKRNDFKMNTCILHSSGALLMDISSISLLEESLAGRPASTPVTENGKAVEVQKNINGGPTLVTNAHTSFARNDPAIDVDQGNATFDCDNGGGGFDDFDNEDDAVAPCSPIGRWQKEDNPDSRLREFHRRAKMIESTAKQVKWEDPWEELDPYTTQKHMEKPFKKGRPFKLPPQLKSLLTKQKKRKRDNFTSIQFGTTQLSSIVEFCGKD…
C_xamachana_jgi.Casxa1.14212	MQQKYGPRDHYNMTGSVGIEETERPEWLLKQVRDLTENWEIPLGDELEKYLDQLEQVEISFDNGKSTLNFVEAALLIQGSACVYSKKVEYLYSLAVATLDILASRKKQQQASSIDEQGKDKDTTFDEHAEDDDLLDLDDIKESDNIELRNEIERHENVKIIPRIPFALMPKSDMNRKGDDVLLNQKGEIIGKRNDFKMNTCILHSSGALLMDISSISLLEESLAGRPASTPVTENGKAVEVQKNINGGPTLVTNAHTSFARNDPAIDVDQGNATFDCDNGGGGFDDFDNEDDAVAPCSPIGRWQKEDNPDSRLREFHRRAKMIESTAKQVKWEDPWEELDPYTTQKHMEKPFKKGRPFKLPPQLKSLLTKQKKRKRDNFTSIQFGTTQLSSIVEFCGKD…
C_xamachana_jgi.Casxa1.14213	MQQKYGPRDHYNMTGSVGIEETERPEWLLKQVRDLTENWEIPLGDELEKYLDQLEQVEISFDNGKSTLNFVEAALLIQGSACVYSKKVEYLYSLAVATLDILASRKKQQQASSIDEQGKDKDTTFDEHAEDDDLLDLDDIKESDNIELRNEIERHENVKIIPRIPFALMPKSDMNRKGDDVLLNQKGEIIGKRNDFKMNTCILHSSGALLMDISSISLLEESLAGRPASTPVTENGKAVEVQKNINGGPTLVTNAHTSFARNDPAIDVDQGNATFDCDNGGGGFDDFDNEDDAVAPCSPIGRWQKEDNPDSRLREFHRRAKMIESTAKQVKWEDPWEELDPYTTQKHMEKPFKKGRPFKLPPQLKSLLTKQKKRKRDNFTSIQFGTTQLSSIVEFCGKD…
D_melanogaster_FBgn0037831_CapH2	MERILPEPGTQVAKCIRAYDEQQDLASLVVLLEELSKNYSTDLRISLGYYIEELLRHCLGRNDVSRRSAIVAAGSALQYCGKIYGDRVEYLCQVVEHQIEALTSQKETPSGSAAPEKNERRHPKKLTNKEVDPYLLTLEPMSDDKRNRTIEYLYQDHTPPVEHRYNTLLPDIPFERLNTNQVNTTEQMLAARYGAIVTRRRRLVDSARFMEMDKNLPMDTNETVLIDQSLVDENSRSLTTAESTMGIAENSTLKSSEVEATLSVSENPPLSSTLAINESSVLDSTRVDPIKDLTLDELIDSGISMEELSDIHTAGQSFDDEGVVDLEDQRQLSPMLQMVSPSMIEMDADLIMNLNVMGLPIKRLRRFKLPPEFDLFRQARLPIKREGQQKSPTTPRTVL…
D_pulex_DAPPUDRAFT_225579	MGPANLSGSSVEEDDVFSSQFAALLKPIRELTKQWELNIADKLEEYVQYIQRIEVNVNGEQMKLDFAKAAMVVQNSAQIYSKKVEQLWLLLQEVIEFLSSNGNGNENDDNQTPGSKIKRNHRKKHHKGDVDLITEPIPKFGSKLKRKATVKDRKKIQTLPYEILQIGSLNSVKIKLYTLSNEHLGYPSDLRSNFPFDPYTLFLQIHHANGQDLVSTEPVPIASMHQDDLEVEPPNLDDWQNDGEMASENEIIPDGLEENGNFNGLTEEVVERMQLRQRAPAPIPVENQVKEKDPWGGMDPYSENDALKKPCGAPVRCKMPVALRKRKGVGKVPNNEEISVEIDEFLGKSQIIKKPALKYPDTEFWEDYKTTGTVIKKQQKLRPEKNIAEGIEEMDQQDI…
E_diaphana_XP_0208947231	MPTATQSAPGSERFSSINFFLQPVRDLAKNWDIQVAPLLEEYLIELDKIQISFDGGSTTMNFAEAALLIQGSACVYSKKVEYLYDLVYRTLDLISSKKRLQQASSVDNQGNDKDITREQEEEFLSLDDLQECKNIDLKEEDEVTASEGSRIIPRTPLALIPIGERDKKDVLLSHTGEVLGSRNDFKMNTCTVHASGALLLDLGNLMLAETSFRRLPTSTPQTCFDAQGTALQSVREPYRPSEPLQPKQEIDEAEVDMPNELNDDNHGYNDDNHDDYDDNDMYDDNDVANQQEDVPEQERMQLRRRDKQQLQMHKQMLKVKDSWEFLDPHSPGRTGDKPFKKGKPFKIPPSIMEPKSDNKKKRKRNETKPKKSYLMPLHEFCTQAFYSHSSKFPKNPLKA…
E_muelleri_Em0003g1405a	MLATEEAHPTFDMHCYGANVLKELAARQCKGSSVSLFSSLVGGKESYEICRLFAATLQLANDHNVNVIISCSKDEPLQSMALQLLSTRMAHEAMSEYRAPSLQQVT
E_muelleri_Em0003g1407a	MPPEREKDVESRFAYLLQPIRDLAKNWDVNVASQLEDYISEIEHITISFDSGQSKMNFAEAALLIQGSTCVYSKKVEYLYALVCQTLDLIASNRKLAQASSVDDQGRDTDASFAQKDHTNEFLGLDDIKVGTNIDLVETCRKGDTKTVSNIPRTPMSLVPLQESERMFNTPLISRTGELLGNKGDFKMNTGYINAKGALLLEPIKEHFVEAVLPQCAGPVDHFVQEGEPTCWMEEGAPVVDCQGDESEGGPPPDFEDGGHSPVGLGTQQDNSREASPPVLRSKQTRVRIEQNERPKDPWQGAHDPHEPIASEDKSLKKGKCCRVPSSIQHSATRKRKRNVSIMPSQHLTNFLLNSFYSCSSMFPKNPLKAPSSTDFEALYWSEQKARLVHKQKDNTTLH…
G_gallus_ENSGALG00000054793_NCAPH2	MDSTTSPSPNCAQPAAAAMEDVESRFAHLLQPIRDLTKNWEVDVAAQLGEYLEELDQICISFDGGKTTMNFIEAALLIQGSACIYSKKVEYLYSLVYQALDSISNKKRERQPCSVGPDGKDADATFGMEKEEFLSLDDISNTSQASVDLKMDHQPNAVNVVPLTPMSLVPPEEAEKINNPLFSRKGEILASRKDFRMNTCTPHTSGAFMLELAGLSPTCLQDRHREENNATGAVGAQSSVIGGRESLRVSTGAMPVQALNFSDDGGAAGPDDDDGGDDLPVDPENNMEVTPAANEHIEPQRSVPQVKGYVLRQRAPAEDLQPHIKEMLDPWQSLDPFGDSEDKPFRKGRPFLVPHGMDDVVGSKRKRKGPRKLQDFLKWFSATYNNSADCRKSRRKGPT…
H_miamia_HMIM019187	MAQSFNIDLSSQLQDFLSEVKDVKVNFEDGQANVNFAEAALILQGGASIYSKKVEYLYSLVSQTLSEISLSSNDSQPNKSEVEPKRVGKVKSYFNMNFEFECQDEVEIANNIDLKEFNTVHAQPLQRFARIPACLLPLDDLEKGDKHLVSIDGHDAGKIKDFKMNATRLQPSLILADDLSFFHNYLISKPNDCLRASSPISVASDDTLILNDMGECELPSPPISITKSIDSQNDFGNALPNEQNATPETHQIVQSVLNMPNSSPFQRSLDSPRRCFQRAVKNPWAEKNKEVLNSLKPNKRLRFTKKKSRELVEQLCKDLKSSSLSIDVDITDHDHCHADDDDIDSNNDFTTFPSDIPIAEAPAPTTYQSSVPISDSEKKELFVRLKEWEQRIMPILQQE…
H_sapiens_ENSG00000025770_NCAPH2	MEDVEARFAHLLQPIRDLTKNWEVDVAAQLGEYLEELDQICISFDEGKTTMNFIEAALLIQGSACVYSKKVEYLYSLVYQALDFISGKRRAKQLSSVQEDRANGVASSGVQEAENEFLSLDDFPDSRTNVDLKNDQTPSEVLIIPLLPMALVAPDEMEKNNNPLYSRQGEVLASRKDFRMNTCVPHPRGAFMLEPEGMSPMEPAGVSPMPGTQKDTGRTEEQPMEVSVCRSPVPALGFSQEPGPSPEGPMPLGGGEDEDAEEAVELALEPKESRSPQQSAALPRRYMLREREGAPEPASCVKETPDPWQSLDPFDSLESKPFKKGRPYSVPPCVEEALGQKRKRKGAAKLQDFHQWYLAAYADHADSRRLRRKGPSFADMEVLYWTHVKEQLETLRKLQ…
L_chalumnae_ENSLACG00000001063_NCAPH2	MNNVESRYTHLLQPIRDLTKNWEVDVASQLEEYLEELDQLCITFDGGRTTMNFAEAALLIQGSACIYSKKVEYLYTLVYQALDLISNKKRKNQAGAAKRSFKKLKEKTICFNRGVQCGKDDFKKKKKKNVCHPPCPELLPINQVALRFMKNFIKKKNSFKLNHKGEILASRKDFRMNTCTPHASGAFILDLSSLSPTNCLNWNNRQDPAVQNAGAQDENGNVLMQMSENEVPDPLPVLNFSEEAEGKLAEKVDEIEMDLASPEHIQRQKEAAPDDRGYLLRERAPSLVEKIREILDPWRCLNPFESSEDKPFKKGRGYSLPIDFIVVNHAGNNLLRGTHAAMCCYAEYYNGADVRKSKKRGPTFADMEVLYWNQVKERLAAQKKLQRKLVRKQWWGGYL…
L_oculatus_ENSLOCG00000015775_ncaph2	MINDSAKSRFNHLLQPIRDLSKNWEVNVAAELEEYLDELDQIPISFDDGATTMNFAEAALLIQGSACVYSKKVEYLYSLVYRALDFISNKKRDKQAPSVGRDGVDNDATFAYRNDDEELLSLDDIGDNSKTNCELRKEIGSKTLTIAPLTPLALSPPDEENKINLLRFCSNKCEILASYSDFRMHNSTPHGNGTFLLVAAGDTSQSLWLQINHKDNSVVHEDAMDVNRMVLQEVSDHEALEPALNISGEGKDTARRNAGQAFDPQGDDNEMDVEVGPVHDIHIERHQDRRMLRERPPVPSENEKDKEILDPWKSLDPFKASEDKPLKKGRYYIIPQRVQEVEGNKRKRKVPNKLLDFLKWFSGVSSESSGRKIKKGPTFADLEELHCKQVKEKLAAQKM…
M_leidyi_ML13566a	MIETEDIRLSQERLAALKELITPIKDLAKNWDVDLNTELEKYMTTFEQDINSDNFAEAALVIQGSAGVWSKKVEFLYSLAVDSLCMLEEKEKKSRENRKAGNEDDQDDEDEMMTLKPVVIKKAQVHVDLSSLARSEHFKPRIPLYLSAISVKNDKPENMLYSKKGELLASRDDFAMNNCIINKFGFASLDIQTCLLLNQSNKKIAITPFFKRQVSQYDGFVNEQKAIQPINLATAVPDETMDVIDIDATLVNDQDPLEDDDPGGALDLCDDDSDHEVPIQTENNAGTVTKEPITPKPSHSMQLRSKLGILASAASPHENKVDSKIKKLDPFKELPVKPFKKAMIEKPRANRKRKKEAAPKSSLLGSLQSSDRVTCSNTKFPNLIRKPEFSENIELFKKL…
M_musculus_ENSMUSG00000008690_Ncaph2	MEDVEVRFAHLLQPIRDLTKNWEVDVAAQLGEYLEELDQICISFDEGKTTMNFIEAALLIQGSACVYSKKVEYLYSLVYQALDFISGKRRAKQLSLVQEDGSKKTVNSETCETENEFLSLDDFPDSRANVDLKNDQASSELLIIPLLPMALVAPDEVEKNSSPLYSCQGDILASRKDFRMNTCMPNPRGCFMLDPVGMCPVEPVVPVEPYPMSRSQKDPEDAEEQPMEVSRNGSPVPVPDISQEPDGPALSGGEEDAEDGAEPLEVALEPAEPRTSQQSAILPRRYMLRERQGAPEPASRLQETPDPWQSLDPFDSLESKVFQKGKPYSVPPGVEEAPGQKRKRKGATKLQDFHKWYLDAYAEHPDGRRARRKGPTFADMEVLYWKHVKEQLETLQKLR…
M_virulenta_scaffold863g1t1	QHDDPIDVVFEDSGLRSDGLSSPPPPPVIDSQKTPPRRQLRDSEALRTNNVQVPFFMGEALAGNALKRPNYQEFFYEFREEWRARQDLHKREKKYWMNRLSEEVYEDLNSVVEGIADSGNQNEQNNELSTNPWDVGVVSSYEDLVRKYVKNCLLEAQDYTLETDISKRVKKWEEKILPVLKEEDTRRPYDIHVYANEILERFEDDEISFKEVVAGKERYEVCRYFLSTLVM
M_virulenta_scaffold1134g1t1	LEKVSISFDGGSTSLDFAEAALLIQGSACVYSKKVDYLYALVYQTLDMISKNKRTQQPSSVDTEGTDKDVSLEKTQTET
N_vectensis_NVEC200_006109_11	MPTQVASNPDGDLMSRYSHLLQPIRDMTKNWDIDVATQLEEYLQEIEKIQISFDGGKTSMNFAEAALLIQGSACIYSKKVEYLYTLVYQTLDLIASKKRLQQAASVDENGQDKDTTFKEEDDFLSLDDIKEAKNIDLKEDIDCLAESPLIPRTPLALIPLGEKERQDVLLSQTGEVLGSRNDFKMNTCCIHKSGALILDLAHLSLLDNSFSRLPTSTPQQAMAKETITDPKPVLEEQVVTDSQAQDISMIGPGDNHYDDDDDGNGCEDLAGDAIEEHAYDEQAEDVPEERMQLRQKHAPAVAALSKATSRDPWELLDPHAPKSNDEKPFRKGRPFKLPPSILGMAKETKRKRKRTEANPSHPVLIPIHEFCAMAFHSHSSKFPKNPLKAPAMKEFEYLF…
O_bimaculoides_Ocbimv22007596mg	MVLEDDGRFNFMLQPIRDLTKNWDVDIASHLEDYLEELENVAITFDGGRTMNFAEAALLIQGSTCVYSRKVEYLYALVYEVLDLLVNKRRNKQSNNKDNNAADDPDVTFGGDDEELLPLDDIETSNVTMKEKNDKEIGTIPRRPMSMVPLGEEEKGNDPLLSKTGELLGNRNDFRLNTSQVNYDSCLLLEASAHFLSGLPNSTNKETTASSHVPTTVIRETESDNIIENYDNPEIDDSMDDIPPPEVSTKAVEEEDTAKRSSERLQERANKIKERMAKDKEKSVDPWLCQDPYEQKSKTEKPFKKGKTFRIPEIVDDKKQKSKKRKKEPITEEKPEINLEPIEDFVANTLFSYKHKLQKNLRDSCLPEFERMCWTKLSERQARRKTETKAMETILEQKI…
P_lutea_plut2.m8.5170.m1	MEFKELTTLEEPSDGIVISSYEELVRKYVDGYLMEAQQYAQETDLSRRVRDWEDRILPVLSEEETHRPFDIHKYGAEILESFRGKSNQHFKDVADGKESFEICRLFLATLQLANNYNVEITADGVGEKAVDTMKLRLIKTTPGHEAIANFRGHSSP
P_lutea_plut2.m8.5173.m1	MPSQASSSDSNDLASKYSHLLQPIRDLTKNWDIDVAAQLEEYLAEIERIKISFDGGKTSMNFAEAALLIQGSACIYSKKVEYLYTLVYQTLDLIASKKRLQQASSVDDQGKDKDASFRDDSVEFLSLDDIKEAKNIDLKEDEDDSKNEGSQIVPRTPLALLPLGEKDKQDVLLSRTGEVLGSRNDFKMNTCTVHASGTLLLDMTHLALLDSSFKRLMTSTPSDVHEPGIASGKQAANQVVPSDDANFEAVDLPEVDDNFDAPQLMEEDVFYDDNGASDNYCSGNGENEDIQEERRALRARAEPQPKQVQNLPFKDHWKMMDPHDPGTSKNKPFKKVYSHASKMLKNPLKTPAFPEFEYLYWIEFRRQQKVQAKQKQLLSQLATDDEIEELKSIVAKSEE…
P_lutea_plut2.m8.5175.m1	MPSQASSSDSNDLASKYSHLLQPIRDLTKNWDIDVAAQLEEYLAEVRIKYN
P_marinus_ENSPMAG00000003431	MEEPEQRFFHLLNPLRDLTRNWEVDVAAHLEEYLEELDNIVISFDGGKTTMNFAEAALLIQGSACIYSKKVEYLYSLVYQTLDMISDKKRSQKVTDVGQEGVDSDTSFAYKHNEEEFLSLDDIQSSSNINLHNNPQNMLHTSIMPLIPMCLIPTDEVERQGTPLYSQKGELLASRKDFRMNTSTPHHTGVFMLELSGLSSVDGTTIANTALNALHCQDAIGAPVGHFEGYMFVKHGADEEFSALQKAIGSNAGNGGGDNGNNVGFLPADADGHGDDPAAAEEVIDRQQVRPENKGYMLRERPIRGEKAPPTKPQAVDPWGNMDIFAEGPPEKPFVKGRTFSLPPGLDPKATKQKRKRAVELMRFNDWFTKNAPDLGRRIKMQEKDPPTELEELYWTNMR…
P_miniata_PMI_016207	MTQGDTEARFLHLLQPIRDLTKNWEVDIASQLEDYLLEIGEIRITFDGGSTSMNFAEAALVIQGSACIYSKKVEYLYALVYQTLDLLASKKKLQQQSSVDEEGNDKDATFAYQKNAEE
P_miniata_PMI_012669	MTDKHATSEPGNVCQRPARSERGRTYQGVQPADDGLNLSGIEVRNNANDGNGFPDNAVEPMGDNADELPLHQDANMSLDDVDMADPPDESFPHPEPNQMEGRRELRPLRIQPKPKAPAVDPWITLDPHEAKALPEKPFKKAKPFKIPSSLLAANSKKRKRKGLPEKPQTQPLTPICQFINKAYYSHASKFPNSALKRPLFPEFDNLYYAEFKRQQAARKKEKEILAKQGRFQELAEQEAEEENDFNPAPELAGMEDYGGAGLDDVDDDDGGGEFDGMAGDFGAVDRSGPSTQEIVTSYEELVRKHVEAYMISAQQYTQVTELGRRVQAWEDRISPILHREEKFGFFDIHEYGTIVLDRLEEVEKKTGQAIPFSRLMEDRHAHDISRLFLATLQLANVYN…
P_miniata_PMI_017466	MTQGDTEARFLHLLQPIRDLTKNWEVDIASQLEDYLLEIGEIRITFDGGSTSMNFAEAALVIQGSACIYSKKVEYLYALVYQTLDLLASKKKLQQQSSVDEEGNDKDATFAYQKNAEEFLSLDDIQIAKNIDLKEVDLNDNLVKIVPRTPMSLLKVNGLEEDVPLKDSKGEVLGKMADFRLMTSVVQASGTLLLDMSHMSLLEASMMRHPMSTPLPGPLQGNNVNDGNGFPDNAVEPMGDNVDEMPLHQDANMSLDDVDMADPPDESFTEPPHPNQMEGRRELRPLRIQPKPKAPAVDPWTTLDPHEAKALPEKPFKKGKPFKIPASLLAANSKKRKRKGSPEKPQTQPLTPICQFINKAYYSHASKFPNSALKRPLFPEFDNLYYAEFKRQQAARKKE…
P_naikaiensis_g6026.t1	MPKEDSSVLDTLDQTFLLTSYAAILKPLKDVKKSFDLDLFEALSRLSDDVLAASQSKLPVNFSEAAVILQSCCNIYGKRVDHLYNLVHGLNKLVTDQRDLEKELANEAIGSNEETEECQGSNESGPEKRNVKLKRQGSAVSFETQSPDLDPDFPLASLVQANANKSPNNTVLDSNGEIIGKRCDFCPQTCWIQSELLLLSQVEYSALVQQSATNYWASSLSQPPDDQLVYHSCVSSTSMLSPKGSEHDDQPISPQSLPGAIGEDSALETPFGTPRTVDEEVEELVDVARDKNSTPPEPDFLATPDDRSNSWHAVIEPAHEDNSRGFDSPMSSGKNCDLSPGLMDRNSNIIKPGKVSSQGLSVFADVLEQSKLHNEVENETILKPEARVIYAVELLSRLR…
R_esculentum_mRNA.RE06971	REGS462.115	MVAEEIERPAWLQKQVRDLTENWEIPLGDELEKYLDQLEKVEISFDGGKTTLNFIEAAMFIQGSACVYSKKVEYLYALAVATLEIVSSRHKQSQAPSVDEHGNDKDTTFDQHREHDELLDLDDIKECDNIELKEELDRSDNEVKTIPRIPFALMPKNEMNRRGEDVLLNHKGEVIGSRNDFKLNTCKWHSSGALLMDVNSISMLENSMSRKPMSTPAMNKAKQNGMMDIQSTDENLGHALATADAQAAMEIEDCNASYGDNQGFGGHDDDDFGENHYMPSSPLSRSQDNVNVPELRERRQKEIENARKEAIWENPWEELDPYTEMKYKEKPFKKGRTFKIPLNLKLPGKEKKRKRKNEQAGSSLEIPVCPIAEFCGKDYLTYRKCPGKSKSKEKWFQEF…
S_callimorphus_NY_Scal100_v169231	MNFAEAALLIQGSACVYSRKVEYLYTLVYQTLDLIASKKRLQQAVSVDDQGQDKDITFQEEEDFLCLDDIKEAKNIDLKEHDILGEVYEHLYSTFLWALLLDLAHLSLLDSSFNRLPTSTPQPSDTAVNKINEPRLELPQEEPAANDLPTPDISMANDDNYDDYDNGGDGLVDQNEDLEDKEHKDNCQYED
S_callimorphus_NY_Scal100_v169241	MQLRQRDRQQAAAVVPKVLAKDPWELLDPHVSNAVSEKPFRKGRPFRIPPSILATIKETRKKRKRTEEKPPQHILTPIHEFCATAXFEYLFWIEHRRRQALDKKQKKILTQYLTQEQYDDLTEVDPEFREDNEPPQQEKHHMVRELLSYYMGPEGGDDYGYDDDDGFGGPTDDVNEADAGPVHPMALEEPSEGLVVSSYEDLVRRYVEGYLLEAQQYAQETDLSRRVSAGKTILCLLYKKRRRMVHLIFTSMEKLYLALSKANNYNVEIGADGLAEKGVDTMTLKLLHKTPVHAGIASFRAPSVVT
S_purpuratus_LOC584403	MESDTRFAHLLQPIRDLAKNWEVDIASHLEDYVTEMEAIVISFDGGSTTMNFAEAALLIQGTACIYSKKVEYLYALVYQTLDLLASKKKMTQACSVDAEGKDTDASFAFKKNEIEFLSLDDLPVAKNIDLKEENERNHNMTGHLLAQTPLSLLKVEGADRGIPLTNRKGETVGYKGDFRINSSMFHSSRALLIDPSHLSLLEQSMMRHPSSTPANFILKAAFSPEKNDNVLPEIPDDIDDDIPKHDISADDVEMGMPFDDSFEEQQPMQVEEKRALRARVVAPIKPIKEFVDPWEPLDPHDSKGVVSKPYKKGKCFKIPASMTKNGGKGRKRKKEPAQEKAELCPIVEFINKAYFSHASKLPSNPLKLPYHEEFEYLYYTEYKKQLDTSRREKRRLAQQ…
T_adhaerens_TriadG52130	MEDKDGRYAYLLQPIRDLAKNWEVDVAKQLEEYLDELEQITFTFDGGTTFLNFAEAALLIQGSASVYSRKIEYLYTLVYQTLDLIAEKQRQKQPASVDDEGKDVDVTFHKLNQEEQFISLDDIKEANNIDLIEEDFENRTSSYICLRTPVSLLPTDNHKRQSDVQLLSGRGEVLGNRGDFRVNTSVIHHSGALLIDTSFQPRANRNAFTLANDGGHNNIMPFTTHNNESFISGENEDIPENDGFNSDDNTFNGGINDTLRDDLHPAIEQEPIVEDSAWQVLDPHDKDAIPERAFKASRNWRIPKNIAIDTQAIRKRKRGQISITSNQPGISIIEFCSRAACTRQNQKLLKHAMNVICEDLEYISYEFAENQHILSREINKLFKFMTSNGQDSDDHDKHD…
X_tropicalis_ENSXETG00000023090_ncaph2	MDDAESRFTHLLQPIRDLTKNWEVDVAAQLGEYLEELDQICISFDGGKTTMNFAEAALLIQGSACIYSKKVEYLYSLVYQALDFISNKKRDQQPASVGADGVDKDATFAHRNDEEEFLSLDDIIDPKKTNVDIKKDQVLHVVNIVPLTPMALVPPEETEKKNNPLCSRKGEVLASRKDFRMNTCTPHPSGAFMLELAGKSPMQFLQHIQHHEEASLAQGEQNAIPEGENDNMEAEKSDCADPVQVLQFSDEGAPAAENGDGAGFLPLDDHDEAGDGEVEQAEHIERRKMQTEERGYVLRERLEQKPASAIKNETSDPWCGLDPFESCEEKPFKKGKHYTLPRGIAEDLSSNKRKRKLPCKLQDFMKWFSSTHWDGSEAMKSRRKGPTFADMEVLYWKHI…
M_brevicollis_MONBRDRAFT_26851	MTLSGDGAPVESRFQHLLQPIRDIADNWNIDIARELEEYLGEIENLEFCFEGSSETFNFAEAALVIQGSACIYSKKVEYLYNLVYETLNKLADKRRVQDKSSVDADGNDADAAELLHEDHVEFLSLDDLPQATNIDLQDHEEQLEETQDLQRMPLCLMPVTSTPYGEAPLLGMKGDVIGNRKDFKMNTSILHDSGALLLGDDASRYVDHSFIRPTTSFAVPSPGGASPSGLASPGGPQIGLSTPRLAARREDDPWATMDPHENNNTTPNQPYKRLTSGKVPRGYTIEHIAKDKKSKASTVRPLTAFLQQQRARRERRRGTVAFPALSQLLRAEEQRRADAARQDRINARRTQHTIEEQWVRYMPDTPEALAEMPDADGPDMDDFDHDDGYDAPVPDAPQ…

## Sheet: CAP-G2
Sequence Name	AA Sequence
A_millepora_amil.1.2.7544.m1	LFVFVAIMATNLREDFLKSVKEDSPVAFLRLIEQHNSRNEPFDVGELLQTLPKKDHESLWTGLRDMTQRLILANPLSSQGNVDLQDEHQSCQWSALLSFLEGVTTVALCALATAEKTAQSPAPFLETAIILHGLLMLLPEEAKALQNNISQLCELWIVNDLSGKEELVTNTVPFVIIRSLGRGTAADVKCVWSLRQCLLVIDFEDNSSASLKQVLHQCMIHPMYLKLEEGRRFLSFLFGLNPELSKEFHKTIKNQIPYCAVNSLRLYGEVLEENCIQDLMYCAVHAQRSGTQSMASRLRKVLEYFHKQKKQRGVDEALLRLYQPIIWRAFKAANPMVRANAAALLTDTFPLQNPDAGNEEIDALLQTQFDILKNLLEDPCPTVRATAIHGVCRVTGVFW…
A_queenslandica_Aqu2127286	MHRKWAIIKRIKPSRSKSISIKEFLQSLPSNDRELVWDSLLKLCSDTMDKVAINEGDGEEDSDTLVAVEGSLSEIVATFEGIVHWVYSYITNEESPVVSDLLLELAVNLHSFMLTFSEEYFKLTDSISLMCETWWNKDLRMKELLVTNTILFILAKAHNSTKVVDLKRLWSVRESFFLLDFEDESADSIKELLLKTLISPFFLKSPEGVKFISYTFTFDIQFTDVIHSVIKSMLPDAPKWVVEAYGKVYFRAWRISSGSLLHHIETHYLQDLIHLCIHAPRKGGGRSPFLTLRRLLNQFHSEITQRSVQEVLYRLYKPLLWRSLRVASPDVRANALTLMLDGFPLYDPNYTKPEIDEEIQRQFNLMKELLMDQSVVVRTSCVSGVCHVLSYYWEMIPAP…
Aurelia_Seg18168	MADREEFLSALSEETAFNFQRVMQRHYAASDLFDINEIIETLSKNQLSSVWNNLLRFCTNALQESFFEDESQQQEGMQEALQTLQDLTTIALGFVSLEKPTITPDVLQIANVLHGILLTLPEEASKLQNDISKLCEYWFQSEFSGKEELISNTVIYLLARTHLQAPTKIDLKRVWDMRQAFELFDLDDESSDGLKELMQRCLMHPLYLGTEMGKKILVFMFTLHSSVIGDFHRNIKNQIPSCQVMFLDAFGEIYFKAWKEATDSFKEKLENDCIQGLMYCAIHGKKLVFSKVYNILTYFHKQKNQPGVDEMLYKLYQPILWRALKASNPLVRANAATILVDAFPLQDSSAGLVQNDELKQMQLDTIAELLQDGYPAVRSIAIQGVCRICFTYWEFIPPA…
B_lanceolatum_BL13679	VETVLHRDKFLQVLKQEAPSDSFANYLKLHDDRNSQLDLLELYQTLNRRQVLQLWSTLQEVCNHHVMSGPFSEDDEQLEQLPERKKTVGIVQGVITMATIAISQDSPIVPDALQDIVLVLHGILPSLPEAAIQLKTQISTLCEKWWLKDLSQKENAVYNAMMFFLKQSLEYKAKGRRFLTFLFGLHPNFTDKLHKTIKNQLPTASKAVQKYYGEIYFNAWNIADGLFKEKIEICLQDLMYRAIHADRSGPKPLSDNLQ
C_elegans_WBGene00010093_capg2	MPKSNPVTPNKQPSEDWNELLTEFRGKGGRALQKTFIRKLWAVQEDIIANANPSTLRCIFFAPALLICPEGIKLSAEILGVGNGLILLEKLILKFNLTDTECQRYGEVFVTAWRNAYQEATEELETDVISVMCQHALYAHRPTCTKFQNVIAAFHAKKLDKSVDEMVTRLLNGCLYRALDAPNYIVQSSAAEVFFNFYPLIGEDTEDMDRIMENQHRYMMDLLRSDVISIRSEATKHVLKAISEFWLLIPKNIVKELMGYIIDTVAKDTVVSVRVAVFEGLNEMAFVPACLTAFEYGLKCAVDALQDKSERVRLAAYQIISRLKNHKFISVFDIITRDDAIAKLDLENVETCRRQLIPIMHICLPISKSLDEAYPRVNYMLGKSRLALLSYFRLLGPII…
C_intestinalis_ENSCING00000021082	MSSNTENLFTSIKDGRSALQTYFNKLGANTEYFFFGGPNRKKLRDTVQNLSETLQAQSEHNNQTMWQNLNIVFIELFKQMEQLLVAGDANENETDKQFSLEEITILLNNICALCFAAIVGENPVVSNELLEIVLIFHGSLPVLSGNSTILPKNICKLCITWWVKDLPKKEELCLNVWIYLLRTICDVPQNTYWLAELCKMQKSVGLFDLSGSFIQSSGQPNVE
C_intestinalis_ENSCING00000022152	MKGIHGAIIDSIYSLGHSHGHMYGNLYYLTWTLADKDQKLHFEEICIQDVMYRAVCAPRNKLSQCLFTSFQVILQEIVKQRTLPCPHMVERLYSPILWRSLKATNAMVRANAANLLFDAFPLQSDGGADKQNELLQRLFTAIESLVSDSQPQIRSLAIIGFCQIFTKHWDVIPAHVIAIQTRNICTNLAFDSSSPKVRQSVMEGLIILLSNPFSHRLLQKLLPSLSNCIHDANEKVRLFFMDLLINVKKTDLISFWDVCPVNNIIAQLDVDNHTITSRIVDLLEGSFLPPDQNIKVWVKRCINFYSRNHNAARKFYLYAKDNLSIIEAEKFILQLCASVFYFLQSSSDTSSEKLEENQNHDESSQNVSENCIDGLLETIFIMLQSMTQKVAQDAQKETT…
C_milii_ENSCMIG00000009717_NCAPG2	MTKRDSFLQAVGKDFVGDFLNFVTLHKNNSDPFDLNELLQELSRKQKEQLWERLKTLLTDVLLEIPVENWQQNDEDSDDEVEMEGAVDLRQVMTVISGVTAVVAASIPAVDENVAYSDLMEIAIILNGIFPALPKSQGNLQVSIKRLFEAWWDKGLEGKEELGKTVFIMLLENSLLTKSKAVDVIQLWHFHEALQSFEFNSEESNQVKDLLLQCFMSVNHMKKEEGRRFLSFLFSWNVEFIKMIHGTIKNQLQFLPKSMIVHVAEIYFRAWKKASGVCLETIEHGCIQDFMHHGIHLPWKSPVHSKVRELLSYLHQQKLRQGVDEMLYHLYQPILWRGLKATNSEVRANAAILFVESFPLRDPGLYNEETDIDIQRQFEELFNLLDDPHPLVRSTGVLG…
C_xamachana_jgi.Casxa1.10532	MTEREEFLAALTEDSAFGFNKLMKRHYDSGDLFNISDILEILSKEQISEMWKNLLQLCSVTLQGSEFDIGDTQQEELTDALQTLKDLTTIALHFVLMDKPIVTDELFQIVSVLHGVLLSLPEDAAKLQNEIAKLCEYWFLADFFGKEDLVCNTIVYLLARTHLQSPKKADLKRVWDIKSAFHLLDFEDESSDGFKSLMQRCLLHPLYLGTDMGKKILVFMFTLHPCVVEFFHITMKNAIPGCQTLVVDGFSEIYYQGWKDADVSCKEKIEQFCIQDLMFRAVHAKTLLFPRLESILMYFHKHKSQSNVDQMLYRLYQPILWRALKASNPLVRGNAATLLIDAFPLLDTSCGVIENDQQRQMQLDAVADLLIDDCPMVRAKAVEGVCKLCFYYWEYIPAS…
E_diaphana_XP_0208919221	MNVREEFLSALEEEEPQSFLNYIEKHNSKNDPFEITEVLQTLSKKQHEKLWDEIKRLCNDAILKAAPSIEDEEEEESNEKMSSLLVCLQGVTTVGLCAITLDKPYIPASLLETAVVLHGVMMNIPDETQKVQNGIAQLCDTWFINGLEGKEELVTNTLPFLVIRTLAKGTIGDVKRIWGLRHSLLLMDLEDDSAEPLKQLLQQSMIHPTFLRAEEGRRFLSFLFGMHPEFSKELHKTIKNQIPNCSIGTLSLYGEIYFRAWRVASGPYLEVLEKDCFQDLMYAAVHAQRTGVQPMSSRLRKVLSYVHQQKKQQGVDEMLIRLYQPILWRAFKVANPMVRANASALLIDAFPLQNPEASNEQADELLQKQFDILQGLFEDPSPIVRATGVHGVCRITGVF…
E_muelleri_Em0002g1810a	MTSYTRAAEIAQSREAQLNVKEAVKTVSSRVDKQFRRCPHCGKNNHSSEKCSFKCYKRKPGHIASVCRQYVAGLQWMEPQDTDVEAYLGTVMTVGRDLVVKLNGRPLKMEAALSIVSEKVWMTVKGTGRLQTSRVVLRTYNQQVEYGDQFHSLMIRVVKEPSLVGRDWLKHLRLDWKMVCNVQCSVEKDSVWQSVLSKYSNIFKPGLGMMKEITAKLKLKPGAVPQFHRARSVPFSLKGAVEQEHRLEELGVLERVVEWAAPIVVVSKKDGRVRLCGKFLDVDQYPLPKPNTGGKRFTKLDLSQAYTQMVLEEDSRCYVTINTHIGLFRYTRLPFGVASSPAVFQAAMDSILQGISILITGKSDEQHLKALEDVLKRGVHTTSDKLQASFLGLVNYYQK…
G_gallus_ENSGALG00000006525_NCAPG2	MKREAFLQAVSKKSVEDFLRFTQISKDTFDPFNLNELLQELSRKQKEILWERLRHLLKETLMEKPVETWQREDAESNDGMEVESAPEMKQTVAVIQGVTAVVTASIPVVDETVNYKALLECAFILNGIIPALPESENILRSAIRRVCEMWWEKGLEGKEQLGKTAFIMLLKKSLSKAATGVDIVCLWKLHQTLLCFDYDSEDSNEIKDLLLQCFMSVKHIKKEEGRRILSFFFSWNVNFIKMIHGTVKNQLQFFPRSLVEYISEIYFRAWKKVSGETLEILEHNCIQDFMHHGIHLPRSSSVYSKVREMLSYFHKQKVRQGVEEMLYRLYKPILWRALKARNSEVRSNAAFLFIDAFPIRDPSFNTEEMDAEIQKQFEELFSLLEDPHPVVRSTGILGV…
H_sapiens_ENSG00000146918_NCAPG2	MEKRETFVQAVSKELVGEFLQFVQLDKEASDPFSLNELLDELSRKQKEELWQRLKNLLTDVLLESPVDGWQVVEAQGEDNMETEHGSKMRKSIEIIYAITSVILASVSVINESENYEALLECVIILNGILYALPESERKLQSSIQDLCVTWWEKGLPAKEDTGKTAFVMLLRRSLETKTGADVCRLWRIHQALYCFDYDLEESGEIKDMLLECFININYIKKEEGRRFLSCLFNWNINFIKMIHGTIKNQLQGLQKSLMVYIAEIYFRAWKKASGKILEAIENDCIQDFMFHGIHLPRRSPVHSKVREVLSYFHQKKVRQGVEEMLYRLYKPILWRGLKARNSEVRSNAALLFVEAFPIRDPNLHAIEMDSEIQKQFEELYSLLEDPYPMVRSTGILGV…
L_chalumnae_ENSLACG00000001823_NCAPG2	MTKREAFLQAVSNDTIKDFLQFIQLHKDHSDPFDLNELLQELSKKQKEELWMRLQKLLTVVLLENPVEGWQQVDEDPDDEMEVENSPDMVQTIDVIKGVTNVVTASVAVVDEAVVYTTLLECAIILNGIVPVLPKSEIALKISIRHLCEVWWGKGLEGKEELGKTALIMLIERSLLAKNSGADIVRLWNLHQALLNFEYDSEESNEVKDLLLQCFMSISHIKKEEGRRFLSFLFSWNVNFIKMIHGTIKNQLQFFPKSLMAYIAEIYFRAWKKAPGEFLETIESICIQDFMHYGVHLPRRSPVHSKVRQLLNYFHQQKLRQGVEEMLCRLYQPILWRALKARNSEVRANAALLFVEAFPIRDPSLDNEGMDNEIQKQFEELFSLLEDPQPLVRSTGVLG…
L_oculatus_ENSLOCG00000012399_ncapg2	MTKREEFLNSVSKENVEEFLKFLKLHKDSSEPFDLPELIQELPTKQKELLWGKLQALLTESLLDFPVEQWNQLDDDSGDEMEVELPAALKQTMAIIEAVTAVATASITVMQDDDAYDALLGCAHMLNAILSAVPPSEMVVQASVQRFCEQWWEKGLEGKDELGRSAFLGLLERSLSLKSKATYLQRLWNLHEVLLTFSFDSEDSKGLSDLLLQCFLSVNHIKREEGRRFLIYVFSWNVNFVKMIHGTIKNQLQFFPKSITVHVAEIYFRAWKKASGVILEEIEKVCIQDFMQHGIHLYRSSPVHSKVRQILSYFHNQKLRQGVDEMLYRLYKPILWRGLKASSSEVRANAALLFTEAFPIQDPSLSNEDMDSEIQKQFEVLFSLLEDPQPLVRSAGVLG…
M_leidyi_ML00877a	MNDGECSVLINCSENPSSFKRYILSSKDAHKKSLLGEKLESLGHDELVSFLENLKNLVNDSVVDVNQDAENIYASVQIIDLIIGKSLVPQITTILDCIHGAFLLFSDQNMFIQNCCSQLLEKCWKMNLPSKNRVAVNVLPYLLARALCPIGKTQDVIRLCEVKEMLELIDFQCLTSASLISLLCKAASSEVFLKNKQGIEFLSYILTMDLDLMVMVNNAITFMIPDLKDAHLFKVGEVYHEGIELAKNRNMSQYEKECIQGLIVCALHCHRVGPNKSSPKVAKVLSVLHKHKKELHIEEMLYTLYKPLLWRALDAPNGDVRANAAVLFLGVFPLIPARYNKVQFQDTLEEQCSKIKELMMDAHEAVRVCATQGCAQILEDFWRILPAHHLTTLLTTLCC…
M_musculus_ENSMUSG00000042029_Ncapg2	MEKREAFIQAVSKELVEEFLQFLQLDKDSSNPFSLSELLDELSRKQKEELWQRLKDLLTETLLESPVDRWQTVEVEGADDMESEHSPKMRKSIKIICAIVTVILASVSIINEHENYGALLECAVILNGILYALPESEQKLQNSIQDLCVKWWERGLPAKEDMGKTAFIMLLRRSLETKSGADVCRLWRIHQALYCFDYDWEESREIKDMLLECFINVNYIKKEEGRRFLSFLFSWNVDFIKMIHETIKNQLAGLQKSLMVHIAEIYFRAWKKASGKMLETIEYDCIQDFMFHGIHLLRRSPVHSKVREVLSYFHQQKVRQGVEEMLYRLYKPILWRGLKARNSEVRSNAALLFVEAFPIRDPNFTATEMDNEIQKQFEELYNLIEDPYPRVRSTGILGV…
M_virulenta_scaffold461g7t1	MASRDDFLQDLKSGDPRKFLNYVIRDSTKDDVFNFKEIIQSLPRKKHSEVWESILSICGNVFSKIDLLEDIDENPLECDAQDILESIWGIAKFALSAISVDDCIIPNELLQVCLVLHGILLSLPEQGGKIQYEISLLCETWYLQGINGGEQLVTNNLPFLLARTHTNNATDGDFKRLWNMREAFWLLDYDHESSESIKNLVLQCYFHPSYYQVTEGKQLLSFFFGVDVKFSMEIHKLIKNQMPTLPQHKVDVIAELYFKAWHNHSGSLKEQLEELIQDFMYHTVHAKRSGGSNSLASKLRKVLSYFHGKKREPGVDEMLYRLYQPILWRSLKAANPLVRMNAISVLVDAFPLEDPSASNAENDEIIQKQFDTFAEMLLDPFPSVRAEVILGFCKICGVF…
M_virulenta_scaffold461g7t2	MASRDDFLQDLKSGDPRKFLNYVIRDSTKDDVFNFKEIIQSLPRKKHSEVWESILSICGNVFSKIDLLEDIDENPLECDAQDILESIWGIAKFALSAISVDDCIIPNELLQVCLVLHGILLSLPEQGGKIQYEISLLCETWYLQGINGGEQLVTNNLPFLLARTHTNNATDGDFKRLWNMREAFWLLDYDHESSESIKNLVLQCYFHPSYYQVTEGKQLLSFFFGVDVKFSMEIHKLIKNQMPTLPQHKVDVIAELYFKAWHNHSGSLKEQLEELIQDFMYHTVHAKRSGGSNSLASKLRKVLSYFHGKKREPGVDEMLYRLYQPILWRSLKAANPLVRMNAISVLVDAFPLEDPSASNAENDEIIQKQFDTFAEMLLDPFPSVRAEVILGFCKICGVF…
N_vectensis_NVEC200_001067_11	MRLGQQQPATNPRAVLLDVASQETPEALVELIERHNSKNDAFDVLEVLQTLSRKQHEKLWEGLKNLSDSAIMMASPDPDKTDEQQAEHFISMLACLQAVATVALCALSFDKPVVPGLFLETAVLLHGIMMCLPEESQKLQTSIAQVCETWFLNDFEGKEELITNTLPFYVIRSLAKGTASDVKHVWGLRQALLLIDFEDESSSSLKQLLHQCMIHPIYLRQEEGHRFLSFLFGMHPELTKELHKTIKNQIPVCSVSALTSYGEIYFRAWRVAAEPYLGTLEKECIQDLMYAAVHAQRLGALSMSSRLRKVLGYFHMQKKQKGVDEALVRLYQPILWRAFKVANPLVRANAAAILVDAFPLQNPDANNEEIDALLQKQFDLLQELLEDPSPIVRATGVHG…
O_bimaculoides_Ocbimv22008206mg	MMREFKDSQLRSALIIIAGKLPPKLVPYLSHQCLSKLQKLDTDSVKEDFSALIQTTCSWGQMKGLLDLIQEWLTDGMKTKLNSSLNSKQSKRNQQVRFREEVIPKPILALKFLLFVIEQPNCRALLLNKYQSNIIGILEQLKFVLNLLEQRLTVGLKRLQCADDTFLQAAYYLYIRINLLLYVGVHSENDEGVSLEEIMKQFCTWAQNIIVPIFNNQNSSEKAIRKRRSSDSKENSITLSCNLLEHLFTLTHTYLLMFKINETQYYLLSELFHCCFTNVHSLKLLPIIIKCLIQIISVNLSANHDIQQAIHESFKFLLETLVTLATSKSDTNTLTLILNSSRLHMSNLLSTIYEFSTHRGTMLSCFFQTILTAILSELSFASEQNDINEVPSNFQDIKL…
O_bimaculoides_Ocbimv22039343mg	MQLDTGSDVSIINTAASQPVSVFNQVEKELERLEDLEVIEKVDYSATTVYIKKKNEKSNSHTEWEEVLSGYSRRELEELWQNLLKIATSLLLGLESSHDSSQEEMEKVFKSLDCLIVLATATVVSNKLQIPPSLLEMSILLHDLLLSLPDTADNLKNNFSKLFETFWTKEKPGREYVFENTLHYLFQVNLKSKSTLKTMKRLWQLRSAFPLIKFDDPSSQDLKNLICESLVSPSFMKKEEGVRVLGSILPLNLDFMKTCHEVIKKSLVTVPKNFIPKYGPIYFRAWQMSNEEAKLKIETGSIQDIMYNAIHASGIQLVKDLRKIIAYIHRQKKQKGVAEMLHRLYAPLLWRSLKAANSVVRLNSLFLFIDAFPIQNPAGGIQENNDLLQNQFNAFDILL…
P_bachei_sb	MPLDRTSTEVVVTALLNNPLCIYSPSVRHAMVSLLETLHQTEDLLSLVEGSSSQHSDADLSEPLLSSDSDRIAQVLEVVAILLHCSARDTAKNGKAAVTSKVVPGVPELLERYGGDRCCEAISVIIGCSFWIFLSFTAENMYVQNVCCLLLEEWWSNDLPEKRIIALNIPFYLLSRFSSAVGKVEDMKRLNGIKDTLKLGSTDCPSRNTLSSLVGLAATNPQSLKSADGVEFLAHVLVVTPELMKTTHTALKSVIPGSRYLPKIGDIYYKAVGLAGHLSAEYTSTVLQDLAKCALYCHRTGPNKAAGDVLKVLSVLHKHKKDHQIENTLYDIYNPILWRALDLPNGHVRASAASLLLDVFPLIRPQCPVVQFDEALNVQCGKIQSLLTDNDETVRVCAV…
P_lutea_plut2.m8.32593.m1	MNIREEFLKSVEEESPETFLRFMEQHNSRNESFDVEELLQTLPKKEHERLWAGLQDMTHRVILTSPLSSQENADFESDEEGSQCPLLLSYLEGVTTVALCALTTPEKSTHTPPAFLETAVILHGLLMVLPEGAESLQNNIAQLCESWFLNELEGKEELVTHALPYLIIRSLNRGIVSDVKRVWSLRQALLLMDFEDNSSESMKQLLHQCMIHPMYLKLEE
P_lutea_plut2.m8.32592.m1	MYSAVHAQRSGTQSMASRLRKVLEYFHQQKKQRGVDEALLRLYQPIIWRAFKVANPMVRANATALLTDTFPLQNPDAGNEEIDALLQKQFDILKDLLEDPCPTVRATAIHGVCRITGVFWELIPAHVIKMFLTTLINDLAFDTSSSAVRVAVFQGLKFVLDNRLSHPLLKPLLGNLQDLVHDTAERVRVAFLDVLILVKGLKAIKFWNIVPLEQLLSQLEVEQSSAVIRRIVKLLVNSFHPTGKGADTQVTRCSALWQSNPVAARKFYQYVHLHSTVSATGKFMVCLCHCLVKFAQKGGDESNISFESESEENPTSSEDKENTDSAAANTDTFDAAVLAGMAETVAICWGGIKDKLEKGGNESTKTKLVEKFTKALPKLFGGLKHPRIQAACLVIAGFL…
P_marinus_ENSPMAG00000003307	TPARDTFLQSLKEESPSRLLEIVERHKSRTDPFNLKEVLEELPLRSLKDALESIGKILTESLLRCPAEQWNVDPPQHEDMETVATGSVLESTVAVVTAVATVLSVAVKTVSAEVIEDILESAIILHALLPLFTESHPNLRDTVIHMCESWWERDLRGKEELGKNMILTILRYNLIQQALGAGMKRLWSLRESFRLFDFNPPETEELKELLLQCIVTNIYLKTEESRRFLSFLFSLNVDFIKTIHAVLKKHLLSLTKVQVGYYADIYFQAWKKATGPYLKMMEEHCIQNLMEHGVYLPYSSPMNSKVRQMLSYFHAQKVRQGVDEMLHRLYEPILWRALKASNSEVRANATLLFTDAFPLQDPAFGREEADANLQRQFEELFRVLDDPCPRVRSSAVLGV…
P_miniata_PMI_011485	MVAPSCLREAFLQAAENNDQEEFIHFLQRHNAKDDDLTVEEILQSFSRKQYDRLWSGLNQMCASTLLNSPFETAEDSEEGAGNKESSLATHACLQGIVTVASICLAMDKPVITQAMFETTVYLHGVLLDLPDSASKLQHGIAKLCEKWWVSEHMGREELVANTLMYFIVRSLQSSATIADIKSLDSLRHALSKINLDVESSTTLKDLLEQCMTKPNYLKQDKLLSYFSKQKRQQGVDKMLLTLYEPIIWRAVKVMII
P_miniata_PMI_010828	MRNEIQGIESSCNSEVAHKNDPEIEFKEYSEVYSSDDECLRAPELTSQQAESPTQVANASVRANAAALLIDAFPLQDPESNKEDSDALTQKQFDIFQDLLDDPCPVVRVTGVHGICRIASVFWELIPGHTLEAFMTKLIRNMAFDISTADVRAAVFKNFLPILKDFIHDSSEKVRVAFVDLLLKIKGLRTIKYWNITPMEHLLAQLVEDSAPVARRLVSLLFNSLQPVDRTGEVQIERCITLIQTNPTASRVFYQYAHRHMSVATAGKFLLLLGQCILGCVRKAQSKNGQSQTNPTQGAGQDEGEEEKENVVRDEDSLSLQDTDIMEGMLEIIAVLWTGINDQLAKPENQTTKKQLVSRFSKALPEFLTVFQDGRALSAVLVIAGYVPSSSIPTFSRSC…
P_miniata_PMI_008347	MVAPSCLREAFLQAAENNDQEEFIHFLQRHNAKDDDLTVEEILQSFSRKQYDRLWSGLNQMCASTLLNSPFETAEDSEQGAGNKESSLATHACLQGIVTVASVCLAMDKPVITQAMFETAIYLHGVLLDLPDTASKLQHGIAKLCEKWWVSEHMGREELVANTLMYFIVRSLQSSATIADIKSLDSLRHALSKINLDVESSTTLKDLLEQCMTKPNYLKQDKKLEKHCIQDLMYHAVHACRVGSRSLASTLRQLLSYFSKQKRQQGVDKMLLTLYEPIIWRAVKVANASVRANAAALLIDAFPLQDPESNKEDSDALTQKQFDIFQDLLDDPCPVVRVTGVHGICRIASVFWELIPGHTLEAFMTKLIRNMAFDISTADVRAAVFKNFLPILKDFIHDG…
R_esculentum_mRNA.RE05760	REGS403.13	MASTSRKQFLSTLDGETPRDFNAIMRRNNNNDDVFHIGEALETFSKDQITLMWKHLSRFCASALQESNFEEEESQPEELVETLETLQNLTSIALHQLSSKNPVITSDMFQVATVLHGILLSLPENAAKLQNDISKLCEYWFNAGLTGKEELLGNTIIYLLARTHLHTPTKVDLERVWDIRESLQLFDLEDESSSGLKALMQRCLMQALYLETELGRKILVYMFTLHPTVAEGFHSNIKNQIPYCQMVFLDALSEIYFKSWKESSGECKKKIEEGCIQDLMHCAVHAKKAIFGRLASMLNYFHQQKCLLEVEAMLYKLYQPILWRALKAANPLVRANAASLLIDAFPLQDPSGGVVENDGLKQMQFDAIAELLQDSFPAVRAIAVLGVCKICYRFWEFLP…
S_callimorphus_NY_Scal100_v167401	MNPREALLNAVEQDNPAKFLELIEQHNSKNESFDINEVLQTLSKRQHEKLWEGLKKMSNSCILNAAPDMMENEDENEQQAEKFFEMLSCLQGVATIALCAITLEKPVVPSTLMETAVILHGIMMCLPEESQKLQNSIAQVCETWFINELEGKENLITNALPFFIIKSLAKGMAVDVKRVWGLRHALLLMDFDDDNSSSLKQLLHQCMIHPVYLRLEEGRRFLSFLFGMHPDFTKELHKTIKNQIPACSISVLSNYGEIYFRAWRVASDQYLEALEKDCIQDLMYAAVHAQRTGTQSMASRLRKVLGYLHQQKKQKGVDEALVRLYQPILWRAFKVANPLVRANAAAILIDAFPLQNPDAGNEEIDTLLQKQFDLLLDLLEDPSPIVRATGAHGVCRIAG…
S_purpuratus_LOC583107	MVTCSKEKELFLAACQADDCQSFLEFLEKHKSKSDDFNISDMLLSVSRKQHEKLWSGLFDLCARTLAKLNPSADPIEQSTLDVVLKCLQGIVTVGTCCLGTEKPVIVDKMLETMTVLHGVLLDLPDSASKLQHNIAKLCHTWWSADLPERELLVPNTIMYLLVKTLQPSGMVSDVKLLCSMRESFSQLNLADESSSSLKELLEQCIINSTFLKNDDGRKFLSFIFCLDSDLAERLHSAIKNQLPSCPKSMINYYGEVYFKAWRNSAPPVTAKLETYCIQDLMHCAVHARRVGTRNLSLTLRQLLSYFTKQKRQQGVDRMLLTLYQPILWRAFKVANASVRANAAALLIDAFPLQDPEANKEETDALLQKQIDILQGFLQDPCPVLRVTGVQGVCRILGM…
T_adhaerens_TriadG63696	MASLHQDFLKLCQNGADSVKFTDFMIRNCKRNSSFSLPEVLQELNKQESNQLWKGILGICNSVLGNFHFELAENEFFEQDLQDRMGAVDCLQEVTKVAALQIKTDKDGIEPSLHEIASILHGILMSLPEAAITLQDSISRICELWWSKDFSAKEELIPHMVPYLLMRCLQPDAVLKDIKRLWQIRNCLLLLDYDDPSADSTKLLLLRCYMQPLFLKTDEGRRILTYTFGLHVPLIEDIHATIKNNIPSSSRSLQEYYGEVYFRAWRSSSGPYREKIENFCIQDLMHHAIHARISRPSIAAALKRILDQFHREKKQSGVDKMLLTLYQPIIWRSLKVANAIVRANAAALLFSAFPLHDPDGANEDIDILMQRQFDAFADLLQDPCPNVREVTVKGVCRAI…
X_tropicalis_ENSXETG00000007162_ncapg2	MSKREAFLQATAKDSVEDFLNFIQLHKDVSDPFDLNELLQELPRKQKEELWEKLKTLLTDTLVENPVEGWQNIDDDSDDDMEVESSSDVKQTMSIIHGLTIAAAASVCVIDEDVCYEALLECAAILSGIVHALPKSESHIILAIRHLCEAWWEKGLQGKEEFGKTAFLLLLAKSLEVKCVVADIGRLWHLHPALLSFDFNSEESHNVKDLLLQCFLSINHIKREEGRRFLSFLFSWDASFIKMIHGTIKNQLQCLPKSLMTHIADIYFRAWKKASGDVLQMIENSCIQDFMHHGVHLPRNSPLHPKVREVLSYFHQQKLRQGVEEMLCRLYQPIIWRGLKARNSEVRSNAALLFVEAFPIRDPNLNHEDMDNEIQKQFEELFNLLEDPQPLVRSTGVLG…
M_brevicollis_MONBRDRAFT_34252	MARDRGASTRVLADRGNEPGSKGPTTATRREDLMNAMSSMDSLAAFHTQEQQADSLDMKELLEAHSVKQAQDLWAAAVSLLQSEVIPALPSGDAAPEALSEVYTLPPHKQAISSFTLVTEMALAAPPAVREDADQVPQDLITIVLAVHDYLLAAPTSARELRNASITLLGNWFRYQRPQYQDITPHLCSAAVIMALEEKANQSAIKRLYSMREAFMALDYDHESSVALKSCLLQCVVEPQFLNVLEGRRFLSFLFGLHLNFTEQLHTNIKSTLPHCPKSFISAYGEIYYRAWRGASGAYQTTIENACIQDLIYHALHARKPAFGPNMPLMLRTMLNDFHEKKQERGVDEMLTKLYEPLLWRALKVANPFVRRNAACLLADVFPLTNPNASRPENEALLE…

## Sheet: CAP-D3
Sequence Name	AA Sequence
A_millepora_amil.1.2.4428.m1	LFSLKGDHNASKRLHIYQFMLSHMGDEDKFNLTGKLCQEVLAAFTDDTIQLDQDSGAVLKDALLILSSKNIKLSSMRSKVAEELADEGDAAGAAIAQARNKFLTQVVKKNMIENIIPIIIELKHLLEKQHSPLLRDLMSCLKEVMKDYRTEVQDVLSADRQLANEIEFDLKRFEEQQKELEDQRRKQFTPGNSTQVSARSSQASGSTPAVQPEVFVTPQLRGATPSPKNGSNVTPLAGAINKMQIGRRHTLAADQTMVPITNALTSKVRVMISPLQDKRCHTFVAPAIMRSARKAIDQAQKVTEQLRGSSSVPQVEVAKEDIAFTKGQQTRTPLKPVNPKVSQKQNEDRAASTPAGERSHLLRVSFFETNPSTAVPPSPIPTSLPIRVYANDKVTPPSW…
A_millepora_amil.1.2.14358.m1	LWKVLSDNGLSHKVLISVLYSFIDSGDKSSHPGPKLESCIMAANIYIILIQVPGSGAYNIFYPLLFQKALDVLRLWPCKVEKKRKRRNEATAGGRKAKTRRGKSIAGSDDVDNYDYNNNDDNGYLYGHMSTEEAKGSIKDKLLSLMQDAVKLLHSYSLKDSEQVLDHVIQLFVETTRL
A_queenslandica_Aqu2123917	MATKQETKRVYSSLELRGLCDKDSEWVNVLWDSNLCQIEDSVQLLERLLQSPLQLKEVVSVTKDWICNDTIVRSITGFWTLLYDIGINYQSLLALIVSLLEKDKSSMIERLTSVYCAQLYFTLLQIPGSVAYKVFHPILFQKSLEVLKLLQHKTIIGSKRRRSTSSRKPSVSSRGSKRSRSIRSVSTQSMDDDDDDNDQTPPDSYDHLIELRSSLRQLLVDLSSLLHNFSLKDHDPTRELLITSLLSLSLHVVDMSHKGMELNLVDPVLSPTHCLVWLCLSALCSSSQGSIDGLLMEVFKHLIPPVSMVIDEGGACPTPIPVPLIVRSQHAVMFISHIVKRCGPDSIFPLKKLLQHVCVGAPDKAEYRGKLVGVVYALMNLLDTETYVSFVQWLYKLSK…
Aurelia_Seg10856457f48f75	MRSLKEIMADYKAEVQEVLGADKQLANEIAFDLRKYEERQREAAMAAAAQPMTPVRNAQPQAQGSEGRPQPEPRTPLATIQSPHPMVSPRVNSAITPRNGSMFTSPKLKTPTNANVTIGANQASQSVPLNVRPPPSAVNRRNLAATALLNSAKKVMVRLQRLSISKQIPMTPENTETPRAMSKTPLPPSYQLPTPMVTANGGNPCASEVVQKTPAPSRREISGMLLPKGNDQESIDNRAISTPQGSLSHISFLAPADISMIPIAQSPVPVKITRLTRKQGKVAQGRNGVEHVICMPSPDKPSAKPNRWNVQSPARWNKR
Aurelia_Seg10856357f48f75	MQIYTFLLQNMNDEQRFKLTGKLCEEIFGPIVDDSFLVDAQSRPLIEDAFALISCQEIKISSAKSKAIDPDVDEMMEEQQVAAVRLRAKVISAIVKKNMIENIFPTIISLKKRFEQEKSPLLRDLMRSLKEIMADYKAEVQEVLGADKQLANEIAFDLRKYEERQREAAMAAAAQPMTPVRNAQPQAQGSEGRPQPEPRTPLATIQSPHPMVSPRVNSAITPRNGSMFTSPKLKTPTNANVTIGANQASQSVPLNVRPPPSAVNRRNLAATALLNSAKKVMVRLQRLSISKQIPMTPENTETPRAMSKTPLPPSYQLPTPMVTANGGNPCASEVVQKTPAPSRREISGMLLPKGNDQESIDNRAISTPQGSLSHISFLAPADISMIPIAQSPVPVKITR…
Aurelia_Seg10856257f48f75	MQIYTFLLQNMNDEQRFKLTGKLCEEIFGPIVDDSFLVDAQSRPLIEDAFALISCQEIKISSAKSKAIDPDVDEMMEEQQVAAVRLRAKVISAIVKKNMIENIFPTIISLKKRFEQEKSPLLRDLMRSLKEIMADYKAEVQEVLGADKQLANEIAFDLRKYEERQREAAMAAAAQPMTPVRNAQPQAQGSEGRPQPEPRTPLATIQSPHPMVSPRVNSAITPRNGSMFTSPKLKTPTNANVTIGANQASQSVPLNVRPPPSAVNRRNLAATALLNSAKKVMVRLQRLSISKQIPMTPENTETPRAMSKTPLPPSYQLPTPMVTANGGNPCASEVVQKTPAPSRREISGMLLPKGNDQESIDNRAISTPQGSLSHISFLAPADISMIPIAQSPVPVKITR…
Aurelia_Seg10856157f48f75	MFSHHFVETLFCFNSYTKHRAYNQFKQSETERKRFSLAGDQNKGKRMQIYTFLLQNMNDEQRFKLTGKLCEEIFGPIVDDSFLVDAQSRPLIEDAFALISCQEIKISSAKSKAIDPDVDEMMEEQQVAAVRLRAKVISAIVKKNMIENIFPTIISLKKRFEQEKSPLLRDLMRSLKEIMADYKAEVQEVLGADKQLANEIAFDLRKYEERQREAAMAAAAQPMTPVRNAQPQAQGSEGRPQPEPRTPLATIQSPHPMVSPRVNSAITPRNGSMFTSPKLKTPTNANVTIGANQASQSVPLNVRPPPSAVNRRNLAATALLNSAKKVMVRLQRLSISKQIPMTPENTETPRAMSKTPLPPSYQLPTPMVTANGGNPCASEVVQKTPAPSRREISGMLLPK…
Aurelia_Seg10856	TALVDEDTDIKQFAEFCLVHILLPRHPAMFSHHFVETLFCFNSYTKHRAYNQFKQSETERKRFSLAGDQNKGKRMQIYTFLLQNMNDEQRFKLTGKLCEEIFGPIVDDSFLVDAQSRPLIEDAFALISCQEIKISSAKSKAIDPDVDEMMEEQQVAAVRLRAKVISAIVKKNMIENIFPTIISLKKRFEQEKSPLLRDLMRSLKEIMADYKAEVQEVLGADKQLANEIAFDLRKYEERQREAAMAAAAQPMTPVRNAQPQAQGSEGRPQPEPRTPLATIQSPHPMVSPRVNSAITPRNGSMFTSPKLKTPTNANVTIGANQASQSVPLNVRPPPSAVNRRNLAATALLNSAKKVMVRLQRLSISKQIPMTPENTETPRAMSKTPLPPSYQLPTPMVTAN…
Aurelia_Seg10858	MEDVCNRTIDLLEDLRIQEATHAWVDELFIGNFCEIEGLPDFLSRDFQRTKCFSETLTELVEVAEKWVALNDLKPFWALLPQHGMLNKALVAVLASFITLKRKGTKDTWADISCILASRIYVSLVLVPGSSAHGILSQVLLMKSIENLKRWPNETATKRKRPTQNHQRAAKSRRGNDRHRRRVQEEDSIEDETTEDGMEGDGVVDDVSREIGKVMKQYILAFLKVSEFYLC
B_lanceolatum_BL09994	MSNFSDVCVKLGIAALEKDWVDQVWDCDFTICDPPTDEAGISIDRRYNESLLRAGQLLARYSNEDAEQAGQDFWSLLSDHDLSYRNIIALAFYCIYTGQQRVASVVEKEAACLATSLYFNLLQVPGSGAYGTFHAVLFEKAVNVLKHWPQTGGNKRKHKNDGTEVQGKKPPKAPRRGGQSQGREDDMEQEGDRNEDEDDSDDEEVVLSAQEMGRIKQLLIGCLKDLIRLLRHFSLKERQESTQHALETLVSLTRVELTSEELSYSTDLTLGHVSSLTQLAYMALSILSTGAHGEVVAMVTSLFRLLLPNVLMMGEGGSVAPNAIPQPLQVISSQAVGYACHLARHGGEAVMPVYRILLQHSCWRVPDKAEYRTRVSQSVVKMLQVLPTPAYASFLEWLY…
B_mori_BGIBMGA010650	MDLILSELSNLFLQHLDEGWVQAVYSSEFLDFGELPPEYEITLDNNSLSVILTNIMKSCDAWLNLEFLSHEEKSWAALSHQVPYKKLLALIGYYIDLGIKNVANKEKRNNALMASLLYYKLLSIPGYKAYHIYHSQIFVLSLACLGFPKAMCDNEYNFLNAKELTREVNSVIDGLKQFVMVLKQLQLNPSDMNFEDILSNMIDIIGCAIVNKLNVDKIELGKVSSVIYEMIDLLCDVNREPNPAAIRLLFKCLLPKFISASTDYRSVNNIVRASYVTYSGLLLSKYGKAALPGYSVLLQHLCYTLEGLEILSNLLSSDPKNNQPNGQGNENAHDNIENVADNDENQVIHENVTTEDESSQDTFVLRQRSHTVRHSELLRAIYERLNDVSSTLRARAFSI…
C_elegans_WBGene00001833_hcp6	MSNINEKDLSEFLESNLRSLNDAVATSSAECNYEDYEEFTNSVDLTFFEQDLSGVLKELKKLAESVVISGKKCDIRNIFEESDVATMKFNLFVWYFLENGQRSDSSEEDVDKGVSAASSYIAMCSLPGAISDLYQIGLYNQCLKIIRNCCHTVRVVTKKSSGAKKKKAGGKSDETNVDGEMTVTTGAADPIIGPPRAVDSAERYLHHLTTQLFAFLHTFSIDTPTLMSTLEVVEDIGRLDLDNRTAGRAIRANSVHEFRSLERFTDRYCAFVHSLVESKYKTRAEVAYGRLIRPRLALMPYPDESNKSSKISTERKRSGELHVNLILSRISRNPEARELKIQTVTVMVYSQCPDLAEFRTNIATFIHKILEALPYTYTYDFVQFMNVLFKGRGAGVKSL…
C_intestinalis_ENSCING00000005863	TIWDVLNDSGISHPCVQVWIYHVLYTGLLASATFDEKRRCLLAAQLYFLLLKQPGSSGSLFYHLILFEKSCSALKMAASVDVSSSKKKKKSAPTASQQHMTLSQEIEIGPDNADEANLTWDEITRILSSLPSLLNDVCHLLEVYSLKDKQTSLTQLVETLYKLYCYPFIFLTTHDGQTASTAQNRTLSELVVKAFRLVVNKKHGAITQLVHLVFRLLMTTITMKAATKCGSGCVSKVFIHRAEVALHGVSLICEDHGDTAHQTTRTLMQNVIGQSPDRSDFRHQTGLFVANFIYKMPVLWYADFVSWTARLANDIKIGNRVGAVVLIGHLLHQSERRADPEKEISSELEQCLSHKFLLQEVIVNKIKDIAPTVRSKSLLVLAEVMDKKLISSNKSYIFF…
C_milii_ENSCMIG00000006435_ncapd3	SSSAALRLLQRLEGLKLRQVSAVWVDTVWELDFTETEPLDSHLEEEIIEDGLEVFSQLHKSLLKFISQDQESAGGIWTLFAENDIHHNVLVAVLYHFVHMIHDKNAGVAQREYALHAAGLYFLLLEIPGSVANRLFHPVLFDKCLATLTRSWPMGVEKNRKRKKDTQVKSSQHEAKGRKRSKPARQTESQMDDIFEEEEEDAHVHFSVNDLCRIRDSIFSVLKNFLRFLSKFSLKDNPHCAHHCLQVFSQLTSFEPVIGGLSFSKAVNIERMRTMPELSYYGLRLLCSPMHGDVNKLLCSLFETLLNTILMIRCEEGSKSVLLGVGQKIVLAKDVAIKFISYIVDELKEPALPTLRILLQHICAKVPDKLEYRSCAAQSVVQLLKKLPSADYATFLDWL…
C_xamachana_jgi.Casxa1.4607	MEEPIVFEKTISLVHDLRVTEVDSHWIEEAIAGNFCEIEGLPAVVSENAKDSNYFVSTLSELRDVSKSWLTIEDSNKFWILLPDQGIQNKAFLTVLASFLTLKGKTSPPSWQDVSSVIASSIYLSLVLIPGSGAHGILNQTLLAKSVENLARWPRSGFSQKRKRGQKNQKRGGKSKRSRTGVSLDREQSNGIELGEVNDDEGAEEIVDDGLGSITIDHAIRNAVLELIKANEWFKQKIQMQKDVKNMSTIQLAAPSAAQFIKL
C_xamachana_jgi.Casxa1.4609	MDVDFIQKVALKDYRQVLYSTVQVLCHLTRCECFHDNFRHPGKSLRELAFQAISSLCSETHGDLRKISRSVMNCCMPGILMLDDDKPVQTVTIPKNLQIIKSDAVDFVCKLASNGNPTIAESVRVLVQNMCVKVPDRAEYRNIVSSDICKIMFHLPEDVRNTLTDWLKKYSKNVKPIAVSSSCLCIGGLPNHLKINVQYFCCFKQDQQSQCIQSMLQSIFNRCSDRSPTVRAKALTCLTNIASSQSRRISATLKDMLSSSINPSSLFQTQNLSDDANSEFRGSERTTILDLIRRRIKDERVLVRKAAVQVFRSILVLSEDVFSNDDITLIFERCMDQALSVRKQAVQSLTQLLEYSPANKQLQMAWLNGVLPMVSDREMTAQEKCVALLEEIVLCRMVS…
D_melanogaster_FBgn0051989_CapD3	MSDFHRIFGDLRVYYEPNQWVDKFWTMAMCLQDGGHQETQLQLLRDLSAIIRAMASYSNTHDNWSNLFSPALGYLTYIYSLVSLVVLPEHVQQENINMQLALNAATTYLLTLTIPGAKIFGVFDEDVIEQVLKVFRLLEMNNNKSLRASMIWMFFLTICDDLKIVFRYVHFKEHLKTRDRIIRCLLEVLYMNFKMGQNTCAPGLHGKCFELFSEIANEHNGDVYETLHLIMRQTFPMHVTDSPQMIAYGRRGAMDWFIQLIDKYPDIVNRILHFYIECVVSNPIKKSNDEKVAIGYAAKYDRVLFTKCNKSCADYVLAVKADDAVGIQIRALDLIEKILLQESEVEWSIFRHEVSDVPREVPLLREVLRCLNDRTLTVRRKACQVLILALRQGSPMTKK…
D_pulex_DAPPUDRAFT_307894	MPENTSAAVNINLTNNGSRFWSFLQEKKVNIQSLLALIGFFIDRGSTLSSTHEERQRCFEACKMYFTMICIPGSMAFRVFHQMLYMKALQLVQLYVQTRKYQQKSALQSQQAKKGHKQTQFEEEEGEAPIGPEEIAAVEKAMSRFLDALFLVAQHLSFKRYPNILKETVECILPIINLDRGAVSLKALEIIHNFCNPLHGDAVQTVHHVFVHILPYLVLDPSEKDLNNKNLVALKDISFNLVNSFISKFGEIIYPLVHGLIKHVCVEVVDRAEYRHKTAQTALDLLQLIPEEHRQGTIRWFLLLAHTEQAFLRLFSLEILSILLQNGMLFAVIFGQCSDQSATVRAKALSILGECIESNDRSVVEIFDIIFSEEVDRRATGAEELEEETDIVELLQGEE…
E_diaphana_XP_0209030072	MILNEHSVVNYDMQGPWIKPISVFLIFCLIVFSSFRRYLQNACNYWSKQGKLNATLIKSLSSHINXSNNKAAWLLLSLMATASVKIDHTIVLDKWKQYTSQKDCDAETLCWVLSVIGSVSDKLPENMVVSLTEELQRKLSGFNDTPDVIAAIIGTLCKLCRSQPQAKTVIDSWCADLLKSCEQTLSGVILXENQVSKVTDEVIVKNLFTVGEVAQLAPGRTTERLFLLVESMLISEASLSTPGTPQSIQKSQLSNTVKAHAFVTLGKLCLQNEHLAKKCTAALARELEVSDDAAIRNNVIVVMCDLCVRYTSLVDRFIPNIATCLRDSAPLVRRQTLTLLTHLLQEDYVKWRGSLFYHFITALVDEDKNIRQFADFCLVHLLLTRHPGMFYQHFVECIF…
E_diaphana_XP_0285147881	MNRDTKLALIDHLGKLHKATNTSYRIFSLDLIAELLNQPSRPITEQENDGQDKEVMVGRKGLLDIIVGRCSDRAPTVRAKALQYLSQCAVSSDPDVINLVKQTLQEPLDKSANSNDTNNVGSMIRKRTCDEKVGVRKAALQVLESVIHLDLNNLHKPDLDMLHDRCMDPALSVRRQAMVSLTALLQEKPDDIVLQSLWLDGILPLVLDRETTAQEKCYCTIEEIILSKIVPLHRSIAEPHTLAWSLLQIVASPNGQEIRRYLQNACNYWSKQGKLNSTLIKSLSSHINSSNNKAAWLLLSLMATASVKIDHTIVLDKWKQYTSQKDCDAETLCWVLSVIGSVSDKLPENMVVSLTEELQRKLSGFNDTPDVIAAIIGTLCKLCRSQRQAKTMIDSWCAD…
E_diaphana_XP_0285147941	MALAESTIEVCNLLNLGNIPIDWTQXVWNDDFYEYHGLPEXFEENASEKQYFKAELEKLLLVCRRWVKSTEETSTEGFWKILSDNDVPLRSLIAFLHAMIESCKRHSRPGPKLESAVISANVYILLVQIPGSGAFNVYHHLLLQKAVDILKHWPRKENSKRKRPQSSQNNGKQSTNGRKAKSRRTAKDSRLENEESDDXDDDSDDDDDIGVGLSLELVDSLKKRIIEFLQDTVLLLSMFSLXGSEQTCVHIMQRLTEMAKIDVITVPSTFELPERSSLKQVKSVAQLGYIALGQLCTTLHGDVGSNTRNVLKNLLPLFLMADGGATLHKDVQLVKDYAVAFACYIAAKECSESQNAVRVLIQHLCTKCPDKADYRVPVAKVTL
E_diaphana_XP_0285147951	MALAESTIEVCNLLNLGNIPIDWTQXVWNDDFYEYHGLPEXFEENASEKQYFKAELEKLLLVCRRWVKSTEETSTEGFWKILSDNDVPLRSLIAFLHAMIESCKRHSRPGPKLESAVISANVYILLVQIPGSGAFNVYHHLLLQKAVDILKHWPRKENSKRKRPQSSQNNGKQSTNGRKAKSRRTAKDSRLENEESDDXDDDSDDDDDIGVGLSLELVDSLKKRIIEFLQDTVLLLSMFSLXGSEQTCVHIMQRLTEMAKIDVITVPSTFELPERSSLKQVKSVAQLGYIALGQLCTTLHGDVGSNTRNVLKNLLPLFLMADGGATLHKDVQLVKDYAVAFACYIAAKECSESQNAVRVLIQHLCTKCPDKADYRVPVAKVTL
E_diaphana_XP_0285147961	MALAESTIEVCNLLNLGNIPIDWTQXVWNDDFYEYHGLPEXFEENASEKQYFKAELEKLLLVCRRWVKSTEETSTEGFWKILSDNDVPLRSLIAFLHAMIESCKRHSRPGPKLESAVISANVYILLVQIPGSGAFNVYHHLLLQKAVDILKHWPRKENSKRKRPQSSQNNGKQSTNGRKAKSRRTAKDSRLENEESDDXDDDSDDDDDIGVGLSLELVDSLKKRIIEFLQDTVLLLSMFSLXGSEQTCVHIMQRLTEMAKIDVITVPSTFELPERSSLKQVKSVAQLGYIALGQLCTTLHGDVGSNTRNVLKNLLPLFLMADGGATLHKDVQLVKDYAVAFACYIAAKECSESQNAVRVLIQHLCTKCPDKADYRVPVAKVTL
E_diaphana_XP_0285156151	MANDDKNTFKTPIKKTKASRAASTPEGNLTHMSSISFCMNASAIPPSPIPTSLPIRIYPKGKDAQPSLISKKGVDDDGEEKQEDVICMPSPDQK
E_diaphana_XP_0285186011	MAFNSSRGPLNIQVHTSSTDNLPKPYRNIANLRSFAKLSSLTSEFIDHVLDNGIEVCAVTETWDKDSVSIAALSPXGYSFINFPRPSSREFSEWTLSAHGRTVKIIIIRPPYSEAHPVTASVFFQEFSSFLEVLCPEILLITFNFHLDDDSDADAKKFLELLDTFGLQEPTHVSGHILDLVISRSSNDINVFSPESSYFISDHCFVECYLSIPRPNIMFKEVTYRKLIASSALSNSEWSSLQSLSQCYDKTLLQILNKHAPINTKVLTIRPRVPWFSPELKEHKASRRRLERKMLRTKTQADKNAYRLACNSYSMLLRESKRKYYSDLIDECGXNTRKLFLVVRSLSNKPDSNPLPPHDDPRILADDFGDFFYRKIELIKRDIDEIVVEPPVVDYPSSQ…
E_diaphana_XP_0285186031	MSFGVSAYSCFGIAIDYFAAYPLKPFEDKMKNVIVIWIVAVASSSPCLHFYTTHHVNLVLWLDGILPLVLDRETTAQEKCYCTIEEIILSKIVPLHRSIAEPHTLAWSLLQIVASPNGQEIRKQELQRKLSGFNDTPDVIAAIIGTLCKLCRSQPQAKTMIDSWCADLLKSCEQTLSGVILEENQVSKVTDEVIVKNLFTVGEVAQLAPGRTTERLFLLVESMLISEASLSTPGTPQSIQKSQLSNTVKAHAFVTLGKLCLQNEHLAKKCTAALARELEVSDDAAIRNNVIVVMCDLCVRYTSLVDRFIPNIATCLRDSAPLVRRQTLTLLTHLLQEDYVKWRGSLFYHFITALVDEDKNIRQFADFCLVHLLLTRHPGMFYQHFVECIFHFNSYDKHK…
E_muelleri_Em0017g197a	MSVQALCQEAFQDLGAGDLPVEWVNGVWNSNFCDSSSLPEEVESIVLNTEKWSAALASCRQWLTRDIQEDNEGFDGGFWSTIVEVNVSHKSLMALTYCLMERCKQTAVARLCATYAAQLYLVLLQMPGSGAFKIFHPMIFQKALDVFYMWPERESHKGKKKKPKDPPASQKATSTRGTRKGKHGKRKRPNTEGDEDGEFCQATITSAQDLHRFLCSYSLRDHEASRYQVIQVLVRLTRTELVAASAALISQSTLGPDCPLCLRAWSCLDLVFKPLHGGVERTATEGGQAYDRGCPPPVEPAWDQGVTQATLTAETDLGPRHGEAVMGPLKTLFQHLCTKAPDKAEYRNKLASVAYRMFALDLVTELLTVPARKPTHGKCLV
E_muelleri_Em0017g208a	MSVQALCQEAFQDLGAGDLPVEWVNGVWNSNFCDSSSLPEEVESIVLNTEKWSAALASCRQWLTRDIQEDNEGFDGGFWSTIVEVNVSHKSLMALTYCLMERCKQTAVARLCATYAAQLYLVLLQMPGSGAFKIFHPMIFQKALDVFYMWPERESHKGKKKKPKDPPASQKATSTRGTRKGKHGKRKRPNTEGDEDGGEEEEEENSMSSLGSEVQLSEEENTEIKDSIRQLSLDLHRFLCSYSLRDHEASRYQVIQVLVRLTRTELVAASAALISQSTLGPDCPLCLRAWSCLDLVFKPLHGGVERTATEVFQQLLPSLLLLTSAGNVCTSSSLPALLTTICQHTLTFVXPTLFSAVGLDIQVFKKYQALPVEDEGRLTCKFLVKMILSRCSDKAPSVR…
G_gallus_ENSGALG00000001491_NCAPD3	MAAESELSRVVAEWRLRDVRDVWVSTVWDLDFTETEPLDPRIEEEITEDGLGAFSSLYQALTPFATGDDKSRGNIWRLFVENNLSRNALVAVWHHFVQRGLNKRATAQQRVYALHAAGLYFLLLEIPGSIAHQMFHDVMFDKCLQTLTKCWPQGQNLMRKRKKMHAESSQTSARRNRRKGTANRNDTSSMEEVFEEEEEEDLENIYFSTDDLLQVRKAIFLLLKNFLRFLPKFSLKEKPQCFQNCLQTFVEMTNFEPVEREFEFSATMSITHAKYIPELAYHGLWLLCSPLHGTENEILRCVFQRILSVILMVQGGAGSRHAVLAITSAVISARNQAVKFISSVVEELKEVAFPVLRILLQHICTKVPDKADYRTYAAQALVNLLNKLPCMEFADFIAW…
H_miamia_HMIM002394	MRPSVHIILDILKNNQLFSSFCDVFSNDTYNEDEFSVRVMFSLDDCDVLADCFSDVLKFLTSESFQYSENSLLYEYNENDLNSKKLASLLFLFLDCYKEQHRFPTAALYLRLLCEPDARVYNLFYPSVFRKCLDLFLFHDLLSNAKFRKCRRKRVRRLRRDDFNDNESDIEEYPLLECKLQFITENLITLDVLLRKLPLSGFIDCLQHVCRSIVGFKRISVTDTRFQFILHDVFCTLHTLSLIHIQLIDNPNLNLDMVLKCLLPLFLMLTGESFALATTLPQRVVTTSSKIVTFIKQLIYSSVEIERIYVFLQCCCVQAPDRSEYRQKLAMNISLIVRILPQNSFVRFIKWLYKFSQSIKVNNRAFGVELICNILDGDISHEDKSTQELVFSFKDIPSL…
H_sapiens_ENSG00000151503_NCAPD3	MVALRGLGSGLQPWCPLDLRLEWVDTVWELDFTETEPLDPSIEAEIIETGLAAFTKLYESLLPFATGEHGSMESIWTFFIENNVSHSTLVALFYHFVQIVHKKNVSVQYREYGLHAAGLYFLLLEVPGSVANQVFHPVMFDKCIQTLKKSWPQESNLNRKRKKEQPKSSQANPGRHRKRGKPPRREDIEMDEIIEEQEDENICFSARDLSQIRNAIFHLLKNFLRLLPKFSLKEKPQCVQNCIEVFVSLTNFEPVLHECHVTQARALNQAKYIPELAYYGLYLLCSPIHGEGDKVISCVFHQMLSVILMLEVGEGSHRAPLAVTSQVINCRNQAVQFISALVDELKESIFPVVRILLQHICAKVVDKSEYRTFAAQSLVQLLSKLPCGEYAMFIAWLYK…
L_chalumnae_ENSLACG00000015474	SLLQEEFVKWKGSLFFRFAQVLVDPDPSIASFVEFCLVHLLLKRNPVMFSQHFVECIFHFNGYEKHEKYNKFPQSEREKSLFSLKGNKNKEKRMKIYKFLLEHFTDEQRFNITTKISQNVLACFVDGLLPLDIDANHLLSDTFDILSCKAIKLSSMRSKPEEDIQVDDDEMAMASAVMQVAQKKLISQV
L_oculatus_ENSLOCG00000004914_ncapd3	PGNMDLLDSLQLLRIKEIASEWVDTVWESDFTETDPLDARIEGEVAEYGPDAFRNVYKCLLPFATEHKEVTESVWTLFAENGVPANALVALLSHFVQVAQGRSASVPQRECALQAAALYFLLLEIPGSVANKLFHAVLFDKCLDTVKKSWPQALDSGRKRKKDTAKGSQGDLKGRKRPKPPRSEEAEMEDELEEEEEEEEEVYMSGNDLLRIRESVFCLVKNFFRLLEKFPLKDKPQSVQHCMQIFVDLTGFEPVIGEVMFSETPDVHKMKTLPELAYHGLRLLYSPSHGDRIQTVRRIFHKLLYVILMMSVREGSRPSLLTPTQHVVGARDLAIRFVSHIADELKDAVLPVFRILLQHICAKVADKTDYRTHGAQALVKLLDKMPCAEYASFIEWLYK…
M_leidyi_ML10512a	MDDLKERLGVDSLSEEWCNDMIKDDFCSENPESWMYDISLIGLEVPFRDFLKSIRKKRQRVWDHLVLSDVSRLQCITNIVLESCIKGEGSPLTGLLSGACYLQLSSLEGASARNVFHNMLFGKVMELLKVQNDVSSFEGILAVYESLSEILESELTLSDQSYWLLVKSVLSSVNINCSNKKAENSSFNQLFSVILKPKDFKFIKESSTYLLSGKSYVGDRCCSLICQFVEANLESHSNLIYTLCSSISDRTEARKQVESYILKLVAVLPKECFFDFVDWIKDLCMSQKVVHRIFGAEMCFQLSFNDAKAEDSSVLESLYQAITFGLSDKAPTVRAKCAMVLSDLLKNSSSHKPLLLFFEPNCSENILPVVHFLSSDEKSSVRKSVCCLLLMMLLKIRLR…
M_musculus_ENSMUSG00000035024_Ncapd3	MALQDLGENLQPWCPLGLSLEWVKTVWDLDFTEIEPLDPSIVGEILETGRDAFTKLYGSLFPFATDESGSLESIWTFFTENDISSNTLVALFCHFVQEAHKKSASAQYREYGLHAAGLYFLLLEIPGSVVNQVFHPVMFDKCIQILKRSWPQESNLTQKRKKDHSKSSKDNYRKSRKRGKPPRKEDYQVDELSREEEEEEEEIYFSGRDLCQIRDAIFNLLKNFLRLLPKFSLKEKPQSIQTCIEVFVALTSFEPIPHKFLISQARNLNEVKHISELAYYGLYLLCSPVHGEENKVIGSIFHQMLNVILMLEVGEGSRCAPLAITSQVINCRNQAVQFVSSLVDELQASVYPVLGTLLQHICAKVVDKAEYRTYAAQSLVQLLTKLPSEEYATFIAWLY…
M_virulenta_scaffold58g61t1	LVDPYVTSIASCLKDSDPLVRRQTLTLLTNLLSEDFVKWRGSLFFKFVMAIVDDNEEIRKFAEFCLVNLLLTRYPNMFSQHFIECIFYFNSYDKHKVYNQFFQTDSEKIRFSLKGEANYRKRLCLYRFLLNHLNDEQKFSLTGKLCNEVLGCVIDGDMEIDQDSGFIIRDALALLGSKEMKLSSMSNKVVEAENEILTEQQEEAVQALATARAKIISQVVKKNMIENIIPIIVALKHMLEKKRSPLIRYLMRCLKEIVKDYRTEVQDVLAADRQLANEIEYDIKKYEERQKELENEFNDQQQRRCVALGQSPLFSPSGRGIVASENGQAFQSPRLKSRVNGARDTLNLETVDNVHMGCKSIVKRGRQALLATVLINSAKKALGESRRRSFAPSLSPEYT…
M_virulenta_scaffold58g62t1	MDQALSVRKQAIISLTELLKVIPYNQALQSAWLDGVLTRVIDKETTVQEKCCLLLEEALLHNIVDSSRPEEDEQMLAWELLKIVSGDDGQELSGAAREVNVNMSGVGSFNSAWLLLSEISVYFNQIDQVRVVDAYRNSSNIEDLDFCTMTRMLKVLASLSEKLTERDRNEILDNLKGKICGCECSPEIISASVTCIAKFSTASKGNDPNLKEWCESVMGICEKIISDSVLGTETDLSMDEALVTRSLFTLGEVAQVCPTKTSERMFIMVQSFLFSDKNPQDGNSNSLAEHSDIFRNRNLSPVIRAHAFVTLGKLCLQNEDLAKSCIAAVARELDNSKHPVVRNNVIVVMCDLCVSMCWTIS
M_virulenta_scaffold58g63t1	MTLKLKKKKTKKNPTPRSNTTGEIRSLAFKCLELVCRNFHGNTSQLSRKVCESLMPNLLMMTGEKGASYPGTIPKRALDLKDKTLEFVLIIIRNYVEEAKEKGQGTLLLNRGWIDCKP
M_virulenta_scaffold58g67t1	MLLDNGLSHKATVALLASFVGLADKGCKAGYKLLSSVLAAKAYIQLLCIPGSQAYKIFHSTLFEKVIDVLKLWPQKDGTAAPKRKGKDKRKNPRKRQRLRAPIVSSFDSDEDDDDDKDSDEGMDVDDEGCTDEVNAIIYNSLLTLMKVTLGQGVAPVSLLRGLEIP
N_vectensis_NVEC200_002536_11	MAKQGRPTKTRRTAQPSQPQVNEMDEDSDDEDDNDDDDHPYHGVVATEAAQQKVKGRMVELLQDVVLLLSTFSLRDADQTRHHVIQLLVELTRLDVTDENMTFSFPPGSQIYNINSLAQVAYIGLGLLITSLHGELVANTRVVFKHLLSNILMAGAGSSPTVPKGIQLIKDKAVKFACFVVGKDCSESMGVVRVLIQHMCTKCPDKAEFRAPVAKSATDLMKLLPLSFYCGLIEWLHKYSKNTKIGYRVFALDLVSQLLTEEDRDIQGGGDTPENCKELTSKKYLLSIVVGRCSDRAPTVRAKALQCLSQCTATSNDSLKSIVKQTLGEALDRNTSAGLNGDCTVGSVIRKRTCDEKVGVRKAALQALESVIHLDLAHLHKPDLIMLHDRCMDPALSVR…
O_bimaculoides_Ocbimv22004418mg	MAGIEQIIAILNDLPLDQLEDSWVKSAWEKDFVELDSVPEDLIIDLEENNFYIEDLLKLQSSLDRWINRETNEVSFWTVLVESNVSYKHFIAYLAYLIESASSKTKGATKRHAGLLASCNYFQLVSISGSGAFKIFNPMLLNLCLDVLRRWTSSAGANRKRKLSQKNSQKNIRAKNRRLNRNTSVEMDDDDGDNGSEESDGEELSPQDNIILQKALVSALKAFIQLVQNFSLRGSDSSIHKSVQVMAELIRPYAGLDNHINCSFTTSTAKYPVELAYVALKQLCSGFQGNSSAIISIVYKQLMSSILMLGINNKVVFSQTIPAAYTQCRLNSISFVCDILRQHKDSAMKSARTLIQHLCIKTPDKTDYRSKVAESILTIMDAFDKINYAEMIKWLGVLV…
P_bachei_sb	MDNIRECLSLSALPGAWCEATLESDFCSYDPSPWSFSPNLLGLERPLIKSLKHVTTRDDVTRLQCALHLVLESGVRGEGSTLPCLLFSTFYLKLCRFPQKLIYHEVLYGKLLEVLESAESEEEGAIEKVHSAITSLISSRGASISERCTWLTIKSILGSLRNNPGISPRALESFTSSRKRIKFFMKESLNVFLEGKSPLADTCCKLLSGSEGTTLLVQHLLTGISERTGPRRETEEYILQLIKSLPDRSPIVDWIIEYSISKKVVHRLFAVEMCFQLSHITSDSLQPLYTVIVESLSDKAPTVRAKALIVLSDLLKTSSAETVFPIFEQALPLLKYHCNDGKSSVRKAASQVLKSLLVHIRVDIKNLLYQLCLDEAVSVRKQALQGVSMVTKARPETRE…
P_lutea_plut2.m8.23006.m1	MASTTERTISACNGLQISKISNDWAEIAWSSDFCEPLELPDLLENCIVDRKYYINELQNLLLISRQWSRGSSSSSNDGLWKVLSENSFSHKVLISLLHSFIGSCNKSTKAGPKLESCILASNIYIVLVQIPGSGAYKKPKREKELMKKHQAAAELRLEGGKEDAVMLVSGYSLKDSEQVLHHVIQLFVETTRLEALPADQMILNFPGDQIYSVKSITSLAYIGLDCLFSSLHGEVGANSRTVLKHLISNVLMVFGGSIASNGVIARDIQTLKDQAVHFICYMTHKENDEMLSAVQVLVQHLCTKCPERAEYRNIVAKAVVDIMKTLPVNVYASLTEWINKYSKNAKISYRIFALDVVSLLLCEPDRPLSSGNFCVSLVFESGNRICKMIGQRSFLCATS…
P_marinus_ENSPMAG00000001477	ASWQFTVKINAINVCSFYSEWADGVWEQDFTDTVPLEGWLEEEVLARGVDAFDQLHLRLENVAHAQEDAENSIWSFLYEKRISHQNLIAILHHFVNSGQKQTSSFQQRILAMKAACVYFLLLEIPGSIAHKVFHPVLFDKCVAVAQKVLPQTSHGKRKLKSAPLKGSQSATGRGRKAKQPRLEEEVHDALENEDDDEEAEEVALTGQNVERLHDVACLLLKTLHCLLSVFSLKGNPQCVGHCIQVLVELTKQNSHSQKIDFALNVSASQAHSLAELAYFNLKALCTSSHGSKDEVLRNVFHRLLNHILMVGGEARANVLAFIPQYAVTLRNQTLKFVCHLVKEVGEKCIPLLRILLQHICVKVPDKADYRGHAAQAVCKLLDCMSSSAYAEFIEWLYKY…
P_miniata_PMI_001922	MCGVDKILSSATQREIAVLSANLYFVLNEIPGSGAYKIFHPLVFQEAVDLLKQWPDPASAKRKRNSSGPTSSQASQGRRPAKTRRVDDRNEEDGADKTTPFDSDDEEDEMTILTPQEIGRIKAAVLGALRNFVQLLRNSTLKDAEQSTQHAMQVLSDLTRVTGDQNIQEFDSTVSPNSSTSVSHVSYLGLAALCSTSHGSVTDMFTLVLKHLMPNFLMLIGENEAVAAATIPKTIQIIKDNATAFIHRMTFDLEDKAVPCLRLLLQHLCVKVPDKAEYRAKTAQTVALVLTYMTVEHRARFIEWLYKYSRNVKIGHRVFALEVVAVILEQLPNTEANETPAGATGVVNQQYLSPTFLTQLLLSRCSDRAPTVRAKALTCFAEFTTSTDPTIQQALTELF…
P_miniata_PMI_002661	MADPVKTTECLQKLGFSELDEQWVDTVWEQDFTEKAELPPSLAQDVTDNRSYTRHLQRAIESCVPWARIDFATLPQGFWSVLSESGLSPRALLALLHHFMCGVDKVLSSAVQREIAVLSANLYFVLNEIPGSGAYKIFHPLVFQEAVDLLKQWPDPASAKRKRHSSGPTSSQASQGRRPAKTRRVDDRNEEDGVDKTTPFDSDDEEDDEMTILTPQEIGRIKAAVLGALRNFVQLLRNSTLKDAEQSTQHAMQVLSDLTRVTGDQNIQEFDSMVSPNSSTSVSHVSYLGLAALCSTSHGSVTDMFTLVLKHLMPNFLMLIGENEAVAAATIPKAIQIIKDNATAFVHRMTFDLEDKAVPSLRLLLQHLCVKVPDKAEYRAKTAQTVALVLTYMTVEHRA…
P_naikaiensis_g54565.t1	MTTLYVDECDKVASLCEYCLEHIAHKHKNLFFSHFVELFFFLNESSDHPQYNKFPSEGADGDSFGAEEDTNQEKRLLIYQLMARSLTEQQKFQLKCRLMADILGVYIKEERPLSPAFDAIMSDVFKMLVMK
R_esculentum_mRNA.RE11402	REGS628.28	MFEDEKPVQALTIPKQLQNIKNDTRDFICNLIKKNDPAIIQSVRVLLQNMCVKIPDKAAYRNILCTDICKIILCFPVNIQETITEWFKKYSRNAKIGYRVFSIDLMNCFLLLPEEDIVGQEGQRSTCRTAFLQAMFARCSDRSPTVRAKALTCLHQVASSPCESVILTFKDLLSSSVNPSGLFQTQNLSKDVVSDSRGSDRVTILDLIRRRMKDERVLVRKAAIQAFNSVLLLLDMPVAVEDLKLLFERGMDPALSVRKQVMHSMTQLLQHFSTNPQLQKFWLNCVLPMVLDRETTAQEQCVGVLEELILSKIRPSDKSYDSDHILAWTLLDNIAGNEGQESSQYFGLVCENWSKNGKINGNLVKSLQTHLNTNNAKAAWLFIAAVSSSSDKINPSIIT…
R_esculentum_mRNA.RE11406	REGS628.32	MAHETCYNKTIDLLQQLKIPDVENQWIDEAISANFCEIDGLPEPLREEAKMTKYFVEQLKDIRDISPTWGEMNESKTFWSWLPENEMSNKALLAILACFITSKTKVSSVSWRDLSCIYASNIYLHLVSIPGSVAHGILNQILLAKAIENLKRWPRGADAPTKRKKTQKSNPRGAKARRGSGRTASQRNAESSRSDEEEDMDVSIEQPNEVGASSPEVEVSMKEAVLDLLKVSLFHLLPLQLSSIFYTFLSNNSFQSLLVLSTLFICENSSCID
S_callimorphus_NY_Scal100_v1335691	MASSSEGILASCHALEVGAIPKEWTDQAWEGDFCEVNDLPDVLKECASDKDWHKQALVGLLAECRLWSSGSTHESNGEGLWKVLSDNDISHRTIIALLHAFMELGGRTTKPGPKLESCVIAANIYIVLNQIPGSGAYKVFHSLLFQKAVDVLKLWPQKGNSKRKRPGGGVSAEQTNGPRRKAKTRRTAQASQPQDDIDESTDEEDDDDENEHPYRQVVAAEEAQKKVKHRMVELLQDVVLLMSTMSLRESNQTRHHIIQLLVDLTRMDVTDMQTAFSLPPGSQIYNIKSLAQAAYIGLATMITPLHGEVAANTRTAFKYLLNNIIMLSAGASATVPRNIQVIKDHAVEFVRHVAAKHCPDTQGVLKVLVQHLCTKCPDKADFRIPVAKAAVDIMKLLPL…
S_purpuratus_LOC591077	MAKETETAERFKTLGIEDLDEEWVNVVWTSDFTENPEPPQSVQGLWSNHRDVLSSLEDAIACSTTWARVDFATLPQGFWNVLCENGIVPRALLAGLHHFMNRVDSLLSSAVEREVAIAAAHLYILLLEIPGSGAYRVQQPMLFEEALDTFKLWPKTETNKRKRPEPRGHQSSQQQAGKKSRRLVSSQTASQKTGDGGDDEEEEEMEDVVSLTTQEVDRIHRAIYHTIKEVVFLLRNVPLKSSEEIIQHVMQRLTEVSRVPTEQGDCQFGNKSSFENVHSISHLAYLGLEALCSGSHGETSHMLRQVFKHLLPNILMLIGENQSVASTSIPKHIQQMKDHAEAFASHMYKEVGEKALPFMRVLLQHMCVKVPDKVEYRSRVSHTIARILTGMPAETEASF…
S_purpuratus_LOC115918881	MAKETETAERFKTLGIEDLDEEWVNAVWTSDFTENPEPPQSVQGLWSNHRDVLSSLEDAIACSTTWARVDFATLPQGFWNVLCENGIVPRALLAGLHHFMNRVDSLLSSAVEREVAIAAAHLYILLLEIPGSGAYRVQQPMLFEEALDTFKLWPKTETNKRKRPEPRGHQSSQQQAGKKSRRLVSSQTASQKTGDGGDDEEEEEMEDVVSLTMQEVDRIHRAIYHTIKEVVFLLRNVPLKSSEEIIQHVMQRLTEVSRVPTEQGDCQFGNKSSFENVHSISHLAYLGLEALCSGSHGETSHMLRQVFKHLLPNILMLIGENQSVASTSIPKHIQQMKDHAEAFASHMYKEVGEKALPFMRVLLQHMCVKVPDKVEYRSRVSHTIARILAEMPAETEASF…
T_adhaerens_TriadG51986	MSENELVSQTEECLAELPFSLMTTEMVERIWQAGFYEEDGDESEISIQDVKPYLNAMLNFLQCCHRWINDDDRQKERIDFWIVLKNSGISVKVLLTFLSTIIRFHSKTNIENMNNLAAVLAANIYSALINVHGSRAYKVFQPALIQSAMNLLKYWPGLKNLTAKKSKKKSRVKGSRKRKIDEDFSDGNDDLMDTDSNVEYAQSDFSYSSQDLMIALLQTIDKALANVSLKDFQECFNGTLHSLIELTRLPDRNMSKTFDWILHNSSPHTETVTNLIFKALSRLILPQHGDPKENINKVSNRIFGLDLIQCMLERFLQDNPQDFTASSLLRIIISRCLDKASSVRSKALSAVAACARLECRVVSEAICEAAVSKITVVTKIVDESHEVTERTTARFGGPT…
X_tropicalis_ENSXETG00000008336_ncapd3	MGDREAVLLEALSRCGLRGLSQAWVDSVWELDFTETEPLDSRIEAEISENGLEAFSTLHESLLPFASEELENNRSVWLLFSENDICRNSLVALLSHFVQAGSNKKANAVQRILALNAAGLYFMLLEIPGSVANQVFHPVLFDTCVNALEKCWPQDPNANRKRKKDTQKSSQGENRGGRKRPRPPRRVEQEMEDLSEEEQDEEEMYFSTRDLLNIRDSIFRLLKNFLRLLPRFSLKEKPQSVLHCIQVFINLTSFESVPQEVPFSDAVSVNRMKFVPELAYHGLWLLCLSIHGEGNQTVRRLFQRLLSVILMMKGGEGSNSALLVINAPVISARNQALRFISFLVNELKEGAIPVLNILLQHICVKFPDKADYRVYAAQALVKLMEKLPNAEYAAFIEWL…
M_brevicollis_MONBRDRAFT_11650	MAPNQLAVTLERLIRPEDWTAIPDAWVTAVHANSYCDINDEPSVRSIVNSLAPLAAELEAALDGLDLAESHNDDVTDNANDEARHNMTLVARRLVDLWLQRPLGDQNQSSPSQLALARTAAIEALHRRLMAQDQASLPTVRRLVQHVGVAATDKTATRVAASAAASALMDVLPQAVWDDLRDWLWRLCQHTRSHCRIMGLELLSLLVTRPTVCQPQHVIDSLKVMIKRGSDRVGTVRQQAVAILARLLSETTLTSHIQPCRSELQSLAIRRLKDSKSAVRKAALLLCGQVAVLAEQPDSGPLHCAAPRRSHPARRPRIAVLADLTLVSFTNDPRPMISAIMPMVIDREDAIKSACCIGLRDLLIGEVENRNDAVILVHLAQPELRSFLHRAVQFWDERN…

## Sheet: SMC4
Sequence Name	AA Sequence
A_millepora_amil.1.2.16965.m1	MIKGALITGFDSKDSVGELKSSILFQVFALHHYKPTPLYVMDEIDAALDFRNVSIVANYIKERTKNAQFVIIGLRNNMFELADRLVGIFKTDNCTKSVTINPQLISSEA
A_millepora_amil.1.2.16967.m1	MMNNGVKFTQSKESWKIDNVRVRKSYSVYFTLDTQVPVNKIFEALDGKGIEFEHILSVQRRLGSNTYVVSFSTAEAKSLILSSWDIECVTVLISLYSVNVERVSSSKNVSNSYAAGAAKAPRTVAFTTTLSSASKTENHNPKEKENRREKEVNESLRSHGRSQESHRERDREREREREHYRERSRRDRERERRFRDRSHHHRHEHYYDEDRYESRDRRHRREESSTEEEDSSSSDEEEWTTLNKLSLQSVSLNGESEETLPTLTPDELDKVDKETVQYEITVEEEKLKQMKPNMAAIAEYRKKEEAYLSRVKELDEVTSNRDQKRKEHEGMRKQHLDEFMTGFSLITTKLKEMYKV
A_millepora_amil.1.2.16971.m1	LYDLVRVKDDTIRTAFLFALRNTPVADDLKQATNIAFKGSKRWRVVTLQGELIDQSGTMSGGGNKVVKGRTGSSIVSDVSPDQLEAMERKLEKETKTAEALDEQEGVLRQQIEQLDKQVKESTPDKNKLKQLQDSVKSHE
A_millepora_amil.1.2.16972.m1	MLNTLTIISMYLERTKNAQFVIVSLRNNMFELADRLVGIFKTDNCTKSVTINPQLISSEA
A_millepora_amil.1.2.16973.m1	LDKVDKETVQYEITVEEEKLKQMKPNMAAIAEYRKKEEAYLSRVKELDEVTSNRDQKRKEHEGMRKQRLDEFMTGFSLITTKLKEMYQMITLGGDAELELVDSLDPFSEGIVFSVRPPKKSWKNISNLSGGEKTLSSLALVFALHHYKPTPLYVMDEIDAALDFRNVSIVANYIKERTKNAQFVIISLRNNMFELADRLVGIFKTDNCTKSVTINPQLISSEA
A_millepora_amil.1.2.19388.m1	MEIGGAKLKMQQGRVDVLTKAIDDTAGQITKANVAIKSCQRNTKKAEDNVSSLEKEIEENSTNLQRLDEEYKMLVEKATQVFEDVEKAQQEMGAMEESLESLRKELEGVEHEENKLRSKEVDIKHEMDKFESVLNENKSKVKHWKKELNKLSLQSVSLNGESEDTLPTLTPDELDKVDKETVQYEITVEEEKLKQMKPNMAAIAEYRKKEEAYLSRVKELDEVTSNRDQKRKEHEGMRKQRLDEFMTGFSLITTKLKEMYQMITLGGDAELELVDSLDPFSEGIVFSVRPPKKSWKNISNLSGGEKTLSSLALVFALHHYKPTPLYVMDEIDAALDFRNVSIVANYIKERTKNAQFVIISLRNNMFELADRLVGIFKTDNCTKSVTINPQLISSEA
A_millepora_amil.1.2.19389.m1	MAEDAPSNEQAKETEDKMDTETTAAETNPARLMITKIVNENFKSYAGIQELGPFHKNFSSIVGPNGSGKSNVIDAMLFVFGYRSKMIRTKKVSQLIHNSENHQNVQSCTVSVHFQKIIDLAGDEFQVVPGSEFVVSRTARKDNSSDYHVNGRKVPFKEVARLLKDCGIDLDHNRFLILQLNRVKAVEKEKDELEGSKNEATEYINMENSITKQRNVLFQRYIHECTVNEQKAVENRDVIKRGYDELAKELKEFTDKKNVLVKDHKKAAKKYDEVAKVAEETRKKFGAYERDDVKYREVAEETRKKFGAYERDDVKYLELRNVRAKVEEARSSLQASHSRGRVLEALMQQKASGKIKGIFGRLDCRESKKRLEEQVDELKKEVSSAEHQLQKNSMEIKAL…
A_millepora_amil.1.2.18842.m1	MTGELWTVAMVSATKAAGKFKYHPERTKNAQFVIISLRNNMFELADQLVGIFKTENCTKSVTINPQLISSDA
A_millepora_amil.1.2.24789.m1	MAVGRVDVLTKAIDDTAGQITKANVAIKTCQRNTKKGEDNVSYLEREIEENSNNLQRLDEEYKMLVEKATQVFEDVEKAQQEMGAMEESLESLRKELEGVEQEENKLRSKEVDIKHEMDKFESVLNENKSKVKHWKKELNKLSLQSVSLNGESEETLPTITPDELDKVDKETVQYEITVEEEKLKQMKPNMAAIAEYRKKEEAYLSRVKELDEVTSNRDQKRKEHEGMRKQRLDEFMTGFSLITTKLKEMYQMITLGGDAELELVDSLDPFSEGIVFSVRPPKKSWKNISNLSGGEKTLSSLALVFALHHYKPTPLYVMDEIDAVLDFRNVSIVANYIKERTKNAQFVIISLRNNMFELADRLVGIFKTDNCTKSVTINPQLISSEA
A_millepora_amil.1.2.18282.m1	MTGELWTVAMVSATKAAGKYRDEADMIEVSFSIDDKNGNDDASHTTERTKNAQFVIISLRNMFELADRLVGIFKTDNCTKSVTINPQLISSEA
A_queenslandica_Aqu2100710	EALYSERLQELTDVTKERDQVRGEYEGLRSKRLDEFMSGFTIISIKLKEMYQMITLGGDAELELVDSMDPFSEGIVLSVRPPRKSWKNISNLSGGEKTLSSLAL
A_queenslandica_Aqu2139142	MKPKALTEHDEGMLEFLEDIIGTSQYKEPIAELWDKVENLNEIRGQKLNRARAVEKEKDSLEGAKNEAEHYLSLKKEAALKQYTLYERYKYDCSELEAKAKEKETELADRIKEVDDSGKKYREGKEEKLKEQKKLYKEYDRLCKSNDKLKSELTACEQRDTRLRQDLKNGSSQLKKTKKLLEKEREKLQDFEATPERSEREIKESETKLKILQKRKEEEEEKMSAVMASLKDDTKHLQEEKEELEKELVVLSQKSNQEKSKFDIAQSELELYQETFATLKNQLSEVKEQLSSMKTTSKDKENELKRLTKALPGLKSELIQTEREYESVSNNNERTNQSLISVRSQLEEAKSSLEAHKNRGRVLEALMEQKMSGRIPGIVGRLGDLGSIDDKYDVAISTA…
A_vaga_GSADVG00003694001	MTHQGEEDEGADEEIDVETLELPPLPEHIQALLTPKYRLVINKIEINNFKSFAGRIQLDQFDEHFTCIIGPNGSGKSNVIDSLLFVIGHRASKMRGAKLSTLLHNSAECPDVKSCSVTVHFEAIAIEGEKEKIRFSITRIAFPDNSSHYKINEKQVSLKEVTKLLREYGVDLDHSRYLILQGDVESIAMMKPIAANEHEQGFLEYLEDIIGTERFKKPLELLNLKVEELSAMWAEKKNRVKAAQNEVQQLDGPYQQALDFIKCDNDYKLSKSKMLQLKRFELGDQEVALTVKYTDREEKMKESNEQCHAKKQLCKQSQDELNRLQKSYDKNNNELTKLKKSLVDYETEDGTIRHEIKTSFDQEKKYEKQNEQETTKIQTWENIPNEKSNEITEAEEKLK…
A_vaga_GSADVG00018747001	MTHQGEEDEGADEEIDVETLELPPLPEHIQALLTPKYRLVINKIEINNFKSFAGRIQLDQFDEHFTCIIGPNGSGKSNVIDSLLFVIGHRASKMRGAKLSTLLHNSAECPDVKSCSVTVHFEAIAIEGEKEKIRFSITRIAFPDNSSHYKINEKQVSLKEVTKLLREYGVDLDHSRYLILQGDVESIAMMKPIAANEHEQGFLEYLEDIIGTERFKKPLELLNLKVEELSAMWAEKKNRVKAAQNEVQQLDGPYQQALDFIKCDNDYKLSKSKMLQLKRFELGDQEVALTVKYTDREEKMKESNEQCHAKKQLCKQSQDELNRLQKSYDKNNNELTKLKKSLVDYETEDGTIRHEIKTSFDQEKKYEKQNEQETTKIQTWENIPNEKSNEITEAEEKLK…
Aurelia_Seg200291	MESDLGSARARLEELENSQLMATRELEMAREQNAMTNLAVEKRTMESAEEQPMAARLEELRLLTSRREAEIISFRERIESASGESGDLVREIEENTIAANQLEVQLEQASASRSGLIEAIDVAEKAASEIRIQVTRVTEQKGKEEVAATKLELRMESLLDNMERHQVDLTVFRPDSHELLLCIADQRKAQSTAAKRKASIDQAGDDPVISESEEVSVEEVQAVEDWDFVESTLGQLKHKLDMGPVNVDAIEEFEELEERHNFVKNQFEDLTNSKDELIDVIERINIETRTRFAETFEQIRKNFKDMFKLLFGDGKADLHLVDEDDPLESGIDVIAKPPGKKLQSITLLSGGERSMTAVALLFSIYQIKPSPFCVLDELDAPLDEANIGRFLKVLDRFID…
Aurelia_Seg5651	MADENGMEMDSESNEIPSVEEAAPQSHARQERLVITHIVNEFFKSYAGKQTLGPFHKSFSSIVGPNGSGKSNVIDAMLFVFGYRSKKIRSKKISRLIHNSEKYLNVPSCTVSVHFQTIIDLPGDDFEVVPNSQFVVSRTARKDGSSDYYVNGKKKTFKEVGALLRKSGIDLDHNRFLILQGEVEQIAMMKPKAETENDEGMLEYLEDIIGSSRFKEPIEQLAKDVENLSDARKEKLERVKIVEKEKDELEGAKNEAMEFLAAENEITKMNNALFQKYILEFKQHIDKAGEGKEKVQAQLDEIHELMREISEQVKEKGKSRKKISKEYDKLTDIAEKCEKAFSEFEQKDVALRTERGQRMKDAKSLEKALEKEKDKLEALIAAPEKNNAEIERLKKVQVD…
B_lanceolatum_BL05557	MDISNSKMKSAQDKLDNVNKEIDEANAAVTKAKVANKTAKRNITKTEEKIGKLEKDIEENKTAVGQFEVELTTLEEKATEVLNLFQETKEKMQEVEAVVADIQKELDVLEAKENELKSASVDIRHQLEEKVTAVKENQGKIKYWKKEIEKLTINVVDDEDAPCELKELTEEEIKAIDKQALTFEITVQEEKQAEFKPNMAAINEYRKK
B_mori_BGIBMGA014008	MGKTKMIDEPMDVEGPSTSSAIQKANVEETEDFDHISDDEEGGIRIYIPPAPKPALTFDTTGPRLIITHIVNENFKSYAGVQALGPFHKEGDDFKVVPNSEIVVSRTAFKDNSSYYMLNGRRVQFKEVAKMLRSHNIDLDHNRFLILQGEVEQIAMMKPKALTEHESGMLEYLEDIIGTSRYKEPIEKLSIKVEEYTEIRKEKLNRVRLVEQEKLKLEQPMREAVELMNLTNAALRTRNTLLQKYIYEINKIIEAKEKEMVELKDNLAKIDEKLARLNEILIEKTTALKNGTQKYDKLRKKKDEIAEKLQNCKRKTVTVQADTAQSNKKKKNLEHLLEQERGKLIELELIPEKNEREIRDCDELLIKHNEAKRVADEELQAAVAGVRAKTQTLQEKKDK…
C_cruxmelitensis_g117.t1	MARAALFFSNPNPNSKYRQFSEINVMRKLFRNGDSEYLINNVPSRLLDVRELFMDTGTGGAQGYAIIEQDRVARLITGKPERRFVIEEAAGVLKFKQKKADAEKRLAVAQENMLRVDDILKELLDQESTLAHQSQEAEAFIQLRSRKEHLERCLLALKWQEAQEKAKFSHQELKNLEQEIIDSQVQIKTLETNLSITRSLEEKERKREEQQIIIDKAKQAIHSTETQRKLDSQAQKDEEEQESYQKTLSELEKEITHLKTSILLVEEKITLQKQTAEAFDQKKNLFEETQRPLKNKLEALNRTRVTHAISQAELETELKNIRHNRQENQKNEQDGHEEAKKWERENKGCLLALANKEEEFDLCREEKFGLSEARETLLSRLEDARSQESKLIAVQQKKR…
C_cruxmelitensis_g421.t1	DHKHRKQSAKKLEKSLANEKEKLEELISAPEKKKNELQKLDEGMIRLELEVAKSELEIYTSQYDNLQKKLEETQTELEKSKSSLKSVLESLEDNQKDLPFTKEQLITAEKQLSDIMAEEEKLKAKGDLGSIDDKYDVAISTACGPLDYIVVDTMDDAQRCVEYLKRSNIGSTTFIALDKNGKRFRVVTVSGDLIELSGMDRYANHVIYTVLPFRCCIAHKIMYAIRQNKQELEAKVAGMKTGVSTMEHQLEKAAMEKRVSVSQARTPSDFNGTID
C_cruxmelitensis_g1134.t1	MENVEQQTQQTDDSPGITDQIDKTTLPNDVSTLGDNRRLIISHIINENFKSYAGKQILGPFHKSFSSIVGPNGSGKSNVIDAMLFVFGYRSKKIRSKKLSLLIHNSENHRNISSCTVTVKFHTIIDKAGEEFEVVPDSEFSVSRTARIDGSSDYYINGKRSSYKEVGALLRSCGIDLDHNRFLILQGEVEQISMMKPKAENEHDEGMLEYLEDIIGSSRFKEPIKELAKAVEELNEARGEQLNRVKVVEKEKDALEEEKNKALKFLEMENEIARKRHVLFHRYM
C_cruxmelitensis_g492.t1	GDLGSIDDKYDVAISTACGPLDYIVVDTMDDAQRCVEYLKRSNIGSTTFIALDKNGKRFRVVTVSGDLIELSGMDRYANHVIYTVLTGHHIITLLLLYST
C_elegans_WBGene00001086_dpy27	MQPFKRRALTSDDDRPFDDVSSGAYMLELEAAENVKYDEKEDLLNVQIPPKYEDQISDPDGNRMIILNIYVENFKSYAGKHILGPFHKNLTMILGPNGSGKSNVIDALLFVFGFKAGKIRTKKLSALINSGGNYESCSVTIMFQMVKDMPVENYEVLTDNCVCITRTINRENNSKYRIDDKDASQKDVQELLLRAGIDMTHNRFLILQGEVEAIALMKPTSKNPNEEGMLEYIEDIVGTNRFVAPISKLMHRVSLLEHKSSQYGASVRRHEGHLKVFEKAMVIGMAYLNTFNNLNYLRGIRVKHNLCRYAETMRDAKMSLVTRTGELEENKDIMLEAKDEVRKKETHERSLNSIVTELENKRIDWQSKKNDWHARDAKRKQGLKSCTQDLGKLMKERDE…
C_elegans_WBGene00004874_smc4	MPPKTSAAPPQSDESKKTTKPVNRHKEGSKDPEEELQRADGSDGEDDDSDLLQLPSRPDFLTKPNRADRLMIRNVEVDNFKSYFGKASIGPFHKSFTSIIGPNGSGKSNLIDSLLFVFGFRASKIRSAKVSNLIHKSAGRNPDKCTVTIHFQRIVDIPGYEVVKDSEFTISRTAFQNNSSSYAIDGRPATKNEVEARLRRVDIDIEHNRFLILQGEVEQIAMMKPVKTTKSETGMVEYLEDIIGTNRLEPFVKLFQRRVNRLTCDLSQQRIARDHARNSKVAMENPVRAAIEFLMKENEATTIHMKLEQRRRQRYLDKIAPKQAELDKMKEEMKSIAETLDTNKNEYKQSEEAQKVMIEERSKLDKNFDSLSKELSDLGTEETRRKEALKRHQANISKA…
C_hemisphaerica_asmbl_89058	MEDETLQQPKQPEEFQSQEPIHQSQSVTERLPVNNQRLVISHIENVNFKSYAGKQVLGPFHKCFSSIVGPNGSGKSNVIDAMLFVFGYRSKKIRSKKISLLIHNSENHQNIDSCTVKVFFQKIIDLPGDEFEIVANSQFTVARTARKDGSSDYYLNDRKQSFKEIGTVLRACGIDLDHNRFLILQGEVEQISLMKPKAESEHDEGMLEYLEDIIGTNCYKEPIENAEKAVEELNERRGEKLNRAKAVEKERNELEGEKNEATEFLTMENKITKKNHLLYQKYIYDCAELEQKSIEKQEAAKKNLDELQEKLKVFVDQKKDKGNEYKKINKLFEKLVEEAEEKKKAFAEFEKVDLKIREDLKHRKKNKKQLDKNLDAETKKFAELKDVPKNSQAEIEKCD…
C_intestinalis_ENSCING00000003660	EVEESAPPEENKDEQLDLPEGITVGPPPHVFGQFGSGDPRLIITHIVNYNFKSYAGKRVLGPFHKSFTAIIGPNGSGKSNVIDSMLFVFGYRANKIRSKKLSVLIHDSENHKEATSCTVEVHFEKIRGKDEYCSVPNSGFSVSRTARKDNTSQYFINDRRVMFKEVATLLQDSGIDLNHNRFLILQGEVEQIAMMTPKALTAHGDGMLEYLEDIIGSSRYKEAIEQLHKEIEVLDEERKDKLSRVKVVEKDKDQLEPIRNEALDFLRKKNERTGLENMQIQCYINSRNNLSRESKAKIDEILAKVSEFEEGFRSVKEEKKEKAKECAKAAKAKERVAATLVGKRDEMRALEKRNVKVFEDRKHRKGKIKELTKKLEKEKKKISDLETLPEKHENEILEL…
C_milii_ENSCMIG00000018393_smc4	FEGDPSASYCASYFDIGIVSNSAVEMVDNRSLEEILAGISPPPPPAMTNEAGAPRLMITHIVNQNFKSYAGEQILGPFHKRFSCIIGPNGSGKSNVIDSMLFVFGYRAQKIRSKKLSVLIHNSDEHKNVQSCTVEVHFQKIIDKEGDDFEVLPNSNFYVSRTAHKDNSSAYHVNGKKATFRDVRMLLCSHGIDLDHNRFLILQGEVEQISLMKPKGQTEHDEGMLEYLEDIIGSERLKQPIQVLCRRVELLNEQRGEKLNRVKMVEKEKDALEGEKNHAIEFLTLENEVIKKKNYVVQYYIYDVQKKISDRIAQKQKIHESTKDINDKNGKLVEDLKVKNMSLKDAEKKVAKITKYIEQKKEKFAQFDLQDIKIREKLKHIKSKEKKLEKQVQKDREKL…
D_melanogaster_FBgn0015391_glu	MQKARPSKGTPKAAGGARQSGQLTAQQQLRAQQQQEEEDAAVDALDDALIEEGGTIYIPPPVPPHCSMESTGPRLIISKIVNRNFKSYAGEVELGPFHQSFTAIIGPNGSGKSNVIDSMMFVFGCRANRIRCKRVSTLIHSSSSYPNLRSCSVAVHFKQIVDKGDGTCEDVPDSSIVIERTAMSDNSSYYQINDKRAQLKDVAKLLKKHHVDLEHNRFLILQGEVESIAMMKPKGQTENETGMLEYLEDIVGTQRYIRPLQQINQRVDQLTDDRTEKHNRCKLAEREMKDLEQPFNEAVDYLKKENELVRTKSFHIQKIISIKKSKLEQYTQEHEACAEELKTHDEGTAALKQSRAEKETIIRKEIEEYEALVKKREQIKKRLVTVESAYTEIQSTMEN…
D_pulex_DAPPUDRAFT_59845	AQSELDTTAQKRKKKNVLDSMKEQLEKASQNYTELHRNLQELESNNPKWAKSLSEKQTELQKVTNEDKTKSEELRNIRIRLEQSRSTFSANTSRGRILDGLMEQKRKGTLPGIYGRLGDLGAIDEKFDGAVSTACGPLDNIVVDTVDTAQKCIAYLKNGNLGRASFIALEKMVGTNFYLAGNCRQFNFAVHFSLQLHLNDVHVIF
D_pulex_DAPPUDRAFT_227791	MHEITNPNLIEKCLNSREQMNEFPDIALALKEREMPFDIPRFTLLDQLARMRANALTKLQEGMLEFLEDIMGTSRYKQPTEELRQRVESLNTLRTEKLNRVKLVEEEKDKLEGPKNEAVAYIKLENDLAQFKYNLQQNKEVKQYSKEYEEASRKLDKSAAKMASLQHEPQKSQINHQLEKVLMKLEKKKEKEEKHFNEIMANLQTETQGLQDEKQKYEPELVQLKMDVAQSKLCPRNVFGSMKEQLEKASQNYTELHRNLQELESNNPNNFNSFLSKVTNEDKTKSEELRNIRIRLEQSRSTFSANTSRGRILDGLMEQKRKGTLPGIYGRLGDLGAIDEKFDGCYGSVSGTKLTKMPLKSPHAAMVCILIKEEQSAGEASVDQLMKQIASFLSEISDE…
D_pulex_DAPPUDRAFT_347345	MPPGKHVVDKRQKKTHEPASDTLKDPDADVVDEGGEDEDGEDRNIYIPPAPAPSLTMDASGPRLVITHIENFYFKSYAGKQVLGPFHKSFTSIIGPNGSGKSNVIDSMLFVFGYRANKIRSKSVAVLIHNSENHPNVQSCSVAVHFQMIEDINDDEFNVVPGSQFVVSRTAFKDNSSFYQINGKRVQFKHVAKLLRNQGIDLDHNRFLILQGEVEQIAMMKPKAPNEHEGGMLEFLEDIMGTSRYKQPTEELSQRVESLNTLRTEKLNRVKLVEKEKDELEGPKNEAVAYIKLENDLAQFKYNLQQLYTHQSLKVIADSEQKKEKVNEEMGDLKTRLEELTLFKSQKDKDLKQCSKEHEEANRKLEKSVEKVASLIKDDEKMVEDYRLINTSRKKAKET…
D_pulex_DAPPUDRAFT_347190	RKARLSEFMTGFAIITTKLKELYQIITLGGDAELELV
D_pulex_DAPPUDRAFT_347192	RKARLSEFMTGFAIITTKLKELYQIITLGGDAELELV
D_pulex_DAPPUDRAFT_67196	IITTKLKEFYQMITLGGDAELEFVDSLDPFSEGIVFSLRPPKKTWKNISHLSRDEKTLSLLALVFALHYYKPTQLYAMDKIDAALDFKNVLMIIALTPEN
E_diaphana_XP_0208919961	MAEAMETENIPDQGAAEVQAGRTRLMISKIVCENFKSYAEAKVLGPFHKSFSSIVGPNGSGKSNVIDAMLFVFGYRSKMIRTKKVSQLIHNSSTYPNCTFCSVYVHFQKIIAEKEDDLEVVPNSEFVISRTARKDNSSDYYINNCKRPFKEVAALLRSSGIDLDHNRFLILQGEVEQIAMMKPKAVSEHEDGMLEYLEDIIGSNKYKEPIEELAKEVEALSEVRAEKLNRVKAVEKEKNELQGSKDEAVEYINMENNITKQKNVLYQKYVEECLKNEEKAAEKSNEVKAGFEDIHKEMKEITNQKKAKEKEHNKTKRQYDELLRVAENTKKNFLDFEKEDVKLREDLAYSQDNVKKLKSSLGKEKAKGEKLQKDGEANEKRVAELTAKKEQLEAQKVKE…
E_diaphana_XP_0209088571	MITLGGDAELELVDSLDPFSEGIVFSVRPKDKTWKNISNLSGGEKTLSSLALVFALHRYRPTPLYVMDEIDAALDFKNVSIVAHYIKEMTLNAQFLIISLRSNMFELANHLVGVYKTFDCSKSITINPEKIASKKG
E_diaphana_XP_0285157511	MAEAMETENSPEQGEEDEMELDCPAAGVGESRLVISNIIFENFKAYPKFVQFGPFYKSLNSIITYNSGTESDVADAMLFVFGYRSKMIGTRNFSQLIHNSPTYPDFQSCGVHVYFQKIIEDDPDYLEVVPNSEFVISRKAYKDDSSDYYINNCKRPFKEVAALLRSSGIDMYHNRFLIFQGELDQIAMMKPKAVSEHEDGMLEYLEDIIGSNKYKEPIEELAKEEEALSEVFAELSNRVKTLEKEMNDLQGYKDEAIAYINMENMISKKKNVLYQKYAEECLKNEGTAAEKINELKAAFEAICKEMNDCSDQKKAKEKDHNEIKRQYDELLRIAEKTKKDYLDYEKVDVKLREDLAYSQDNVKKLKISLGKEKIKTKIKELMDKKKVANDAKSKVDVAQ…
E_muelleri_Em0008g1220a	MVSGSPVGTPPLWVHHGSPVGAPWFPCGCTMVPLWVHHGSPVGPHGSPVGAPWFPCGCTMVPLWVHHGSPVAPWFPCGCTMVPLWVHGPVGAPWFPCGCTMVPLWVHHGSPVGAPFPCGCTMVPLWVHHGSPVGPLWVHHGSPVGAPWFPCGCTMGPLWVHHGSPIYIGCSVISSRNRGIPECAGKKAELLERERRMRTEIAEMEKQKKKCSRDLELLQEQKTCLHQRMEDLDKQSAASQMDPVHLAKLEKQVQQFEKVLQDEIMEVGGSRLQQQQAQLDKVVKEMDGSNEAITKAKVAIKTAERNTKKCKEKITSLEKDLATLEAKVEETKGVLTNLEEEARDIVAKQQGIHTSMRDLEQRLEQRKAELLELDKQENDAEVKLIDLKHSLETYNTKVK…
G_gallus_ENSGALG00000009553_SMC4	MASRSTKTSTAAHQKGRQPIEEPAMQVEKQDGRQLGEGPAEAVSNEESDNRSLEEILGSISPPPPPAMTNEAGAPRLMITHIVNQNFKSYAGEQTLGPFHKRFSCIIGPNGSGKSNVIDAMLFVFGYRAQKIRSKKLSVLIHNSEEHTDIQSCSVEVHFQKIIDKEGDDYEVIPNSNFCVSRTAYRDNSSVYHINGKKSTFKDVGILLRSHGIDLDHNRFLILQGEVEQIAMMKPKGQTEHDEGMLEYLEDLIGSARLRAPIQTLCRRVETLNEQRGEKLNRVKMVEKEKDALEGDKNKAIEFLSLENKMFKEKNHICQYYIYDLQKRINDLETQKENIQKETKDINEKSSKLADEMKSKSKALKDLEKKIDKITVLIEENKNKFTQLDLQDVKVREKL…
H_circumcincta_TRINITY_DN1376_c0_g2_i1.p1	MTIQEDMLDEMILTKTQTQKSNVVPILNGILSQKESGTANTVRLIITHIENINFKSYAGKQILGPFHKNFSSIVGPNGSGKSNVIDAMLFVFGYRSQKIRSKKLSLLIHNSEGHLNIDACTVTVHFQKIVDLPGEDFEFVDNSHFTISRTARKDGSSDYYLDGKKQTFKEIGSVLRTCGIDIDHNRFLILQGEVEQISTMKPKAENEHDEGMLEYLEDIIGTSTYKIPIDELSTAVEDLNEKRSEKLNRAKVVLNEKEALEQEKEDATTFLIMENNITRKNYVLCQKYIHDCSEIELKTRCKEDEIKQQLEKLQTQLNGFLEQKKEKGIEYKKMNKLYDKLLTEAEEKKKAFAEFEKYDLKLREELKHRKKNKKVLEQSLESEKKKLDELNSIPEKSEA…
H_echinata_TRINITY_DN36882_c0_g1_i1p1	MVVENASQENILPPNQSETSQDVAGNKRLIISHIENINFKSYAGKQILGPFHKSFSSIVGPNGSGKSNVIDAMLFVFGYRSKKIRSKKVSLLIHNSENHQNIESCSVTVFFEKIIDLPGDDFEVVPNSQFRVCRVARKDGSSDYYMNGKKATFKEIGTILRACGIDLDHNRFLILQGEVEQISMMKPKAESEHDDGMLEYLEDIIGTNRFKEPIEQAYKEVEELNEKRGEKLNRAKAVEKEKDELEGAKNEATEFLTMENKIIKKNHMLYQKYIFDCTEIESKSTEKRDEIKKQLDDLQEQLKVFIDQKKEKGKEYKKINKLFDQLVEEAEEKKKAFAEFEKYDLKIREELKHRKQNKKKLDKSVEAEKKKFEELKNVPEKSQAEIEQCTQSLEQLEKQ…
H_miamia_HMIM008712	MVQCPDADLSVSPAPSPRLIISRIEIENFKSYAGKVVLGPFHKSFSSVVGPNGSGKSNVIDAMLFVFGFRASKIRLKKLSMLIHRSDDHPNYEFCSVSVFFQKIIDLAGDDFEVVPNTELVVTRTAYEDNSNVYHLNSKRSNFKEVTDLLRKEGIDLDHNRFLILQGEVEQISLMKPKAQSASEDGMLEYLEDIIGTSRYKEPIEVLLKEAEELSDQRKEKINRVKIVAKEKDELEEERNEAVAYLMKENEITRNQHIHYQKHILNTGLILEENSATLVSVQERLADINSKEKETDDYFNAKQEDYNQLTRELEKVSDLLQNSKELFNEIDKKDVKCRADLKHHKANIPKLNKDIQNEENKLEKLKNAPAENENELKHLREKITRLEEEKESEDEKYSA…
H_oligactis_c59705_g1_i1.p1	MNKLYDKLFTEAEEKKKAFAEFEKYDLKLREELKHRKKNKKTLEKSLETEKTKLEELKRIPEKSEAEIEQCTSSLKQLEAQKQVEENALTEIMAGLKNETEGLQQEKESKELALMESQKSVNEAKSKLDVLSSELEIYLSKYKKLSEQLEQAKANADRAKEQNEEKKRQFIAIEEDLPSTKKELDNAEKELKQLTESEKDLSIEVKKNRVKFEECRSAMHASQSRDAVLDALMKEKDNGRIPGIYGRLGDLGAIDNKYDIAISTACGPLDFVVVDTMDTAQKGVQFLKKNNIGSTTFIALDKISNCEQKANAKINTPENAPRLFDLVKLKTEDVRNAFYFALKDTLVANNLDQATRIAYPKDKNSSRWRVVTLKGELIEMSGTMSGGGNRPSKGRIGNR…
H_sapiens_ENSG00000113810_SMC4	MPRKGTQPSTARRREEGPPPSPDGAAEPEPPSGRTESPATAAETASEELDNRSLEEILNSIPPPPPPAMTNEAGAPRLMITHIVNQNFKSYAGEKILGPFHKRFSCIIGPNGSGKSNVIDSMLFVFGYRAQKIRSKKLSVLIHNSDEHKDIQSCTVEVHFQKIIDKEGDDYEVIPNSNFYVSRTACRDNTSVYHISGKKKTFKDVGNLLRSHGIDLDHNRFLILQGEVEQIAMMKPKGQTEHDEGMLEYLEDIIGCGRLNEPIKVLCRRVEILNEHRGEKLNRVKMVEKEKDALEGEKNIAIEFLTLENEIFRKKNHVCQYYIYELQKRIAEMETQKEKIHEDTKEINEKSNILSNEMKAKNKDVKDTEKKLNKITKFIEENKEKFTQLDLEDVQVREK…
H_viridissima_scaffold37g69t1	MTIQESMLQEILSTDMQKNSNNLVTVSSSTSSQRENISLSNIRLIITHIENLNFKSYAGKQVLGPFHKNFSSIVGPNGSGKSNVIDAMLFVFGYRSQKIRSKKLSLLIHNSEAHSNIEACTVTVHFQKIVDLPGEDFELVENTHFTISRTARKDGSSDYYLDGKKQTFKEIGLVLRTCGIDIDHNRFLILQGEVEQISTMKPKAETEHDEGMLEYLEDIIGTSTYKIPIDELSTAVEDLNEKRAEKLNRAKVVLKEKEELEHEKEEATAFLIMENNITKKNYTLCQKYIHDCLEIESKTKSKEEEIKQQLEKLQAQLSGFLEQKKEKGKEYKKINKLFDELLTEAEEKKKAFAEFEKYDLKLREELKHRKQNKKLLEKSLETEKAKLEELKGVPQKSDA…
H_vulgaris105_g27710.t1	MKPNMAAIEEYFKKEEIYLERVKELETVTEERDSKRKDLDNMRKRRLDEFMSGFVIITAKLKEMYQMITLGGDAELELIDSLDPFSDGVVFSVRPPKKTWKNISNLSGGEKTLSSLALVFALHHYKPSPLYVMDEIDAALDFKNVSIIANYIKERTKNAQFIIISLRNNMFELADRLVGIYKTDNCTKSVIINPSSL
H_vulgaris105_g27711.t1	MDIGKSKLSGQQSKLDSLSKLIDEVTQKKTKASVAIKNASRNLKKAEEKVESIEKEIKENTAALLNIEQVELKKLEDDATEVLNAAQEGQERIKEMQKKLEEAKRAFEATDKEEGDLRSKEIDVKHELQKFENTLKENSNKIRHWKDKLDKLVLHKIRKSYVESESQHEELVKLTNEQLADVDDTAIAVSLKFLINI
H_vulgaris105_g27712.t1	MESQKSVNEAKSKLDVLSSELEIYLSKYTKLNEQLEQAKSNAEKAKEQNEEKKRQLIAIEEDLPSTKKELDSAEKELKQVTQNEKDLSIEVKKNRHKFEECRSAMHASQSRDAVLDALMKEKESGRIPGIYGRLGDLGAIENKYDIAISTACGPLDFIVVDTMDTAQKXXXXXXXXXXXXXXXIALDKVSNCEQKANSKINTPENVPRLFDLVKLKTEDVRNAFYFALKDTLVANNLDQATRIAYPKDKNSSRWRVVTLKGELIEMSGTMSGGGNRPSKGRIGNRLTQDYNPNDIEILEKKFYSDTKMLEELQQRKTKLEDTVHNLTKQVKSMEHEVQKLKMEIQALSAQEKEQLLRVQQLSCDLKAAKPDAQHEAKLEKEIAIHNKTYTKAAEISGKI…
H_vulgaris105_g27713.t1	MRNFSKMKDKKGRSRMQCLKANGLSEKLESLAKMTIQEESMLNEIFLSNTQTTKSYVAPISNATSSQKETNPRLIITHIENINFKSYAGKQVLGPFHKNFTSIVGPNGSGKSNVIDAMLFVFGYRSQKIRSKKLSLLIHNSESHLNIESCTVTVHFQKIIDLPGEDFELVENTHFTISRTARKDGSSDYYLDGKKQTFKEIGLVLRTCGIDIDHNRFLILQGEVEQISTMKPKAENEHDEGMLEYLEDIIGTSSYKVPIDELSAAVEDLNEKRSEKLNRAKVVLNEKEELEQEKEDATTFLVMENNITKKNYILCQKYIHDCTEIESKTKSKEVEIKQQLEKLQLQLSSFLEQKKEKGVEYKKMNKLYDKLFIEAEEKKKAFAEFEKYDLKLREELKHR…
H_vulgarisAEP_HVAEP1_T001855.1	MKPNMAAIEEYFKKEEIYLERVKELETVTEERDSKRKDLDNMRKRRLDEFMSGFVIITAKLKEMYQMITLGGDAELELIDSLDPFSDGVVFSVRPPKKTWKNISNLSGGEKTLSSLALVFALHHYKPSPLYVMDEIDAALDFKNVSIIANYIKERTKNAQFIIISLRNNMFELADRLVGIYKTDNCTKSVLINPSSL
H_vulgarisAEP_HVAEP1_T001856.1	MLFVFGYRSQKIRSKKLSLLIHNSESHLNIESCTVTVHFQKIIDLPGEDFELVENTHFTISRTARKDGSSDYYLDGKRQTFKEIGLVLRTCGIDIDHNRFLILQGEVEQISTMKPKAENEHDEGMLEYLEDIIGTSTYKVPIDELSTAVEDLNEKRSEKLNRAKVVLNEKEELEQEKEDATTFLVMENNITKKNYILCQKYIHDCTEIESKTKSKEVEIKQQLEKLQLQLSSFLEQKKEKGVEYKKMNKLYDKLFIEAEEKKKAFAEFEKYDLKLREELKHRKKNKKTLEKSLETEKIKLEELKTIPAKSEAEIEQCTSSLKQLEIQKQLEENVLTEIMAGLKNETEGLQQEKESKELALMESQKSVNEAKSKLDVLSSELEIYLSKYTKLNEQLEQAK…
H_vulgarisAEPlrv2_t10268aep.p1	MTIQENMLNEIFLLNTQTTKSYVAPISNATSSQKETNPTIRLIITHIENINFKSYAGKQVLGPFHKNFTSIVGPNGSGKSNVIDAMLFVFGYRSQKIRSKKLSLLIHNSESHLNIESCTVTVHFQKIIDLPGEDFELVENTHFTISRTARKDGSSDYYLDGKRQTFKEIGLVLRTCGIDIDHNRFLILQGEVEQISTMKPKAENEHDEGMLEYLEDIIGTSTYKVPIDELSTAVEDLNEKRSEKLNRAKVVLNEKEELEQEKEDATTFLVMENNITKKNYILCQKYIHDCTEIESKTKSKEVEIKQQLEKLQLQLSSFLEQKKEKGVEYKKMNKLYDKLFIEAEEKKKAFAEFEKYDLKLREELKHRKKNKKTLEKSLETEKIKLEELKTIPAKSEAEI…
L_chalumnae_ENSLACG00000010083_SMC4	MPSKTKTSTAKAKREGAPLLNESAEQLDIEPQPRENGQGADAPPEAVDNRSLEEILSSIPPPPPPAMTNEAGAPRLMITHIVNQNFKSYAGEQILGPFHKRFSCIIGPNGSGKSNVIDSMLFVFGYRAQKIRSKKLSVLIHNSDEHKNIQSCTVEVHFQKIIDTEGDNYDVIPDSKFFVSRTAYKDNSSVYHINGKKATFRDVGVVLRSHGIDLDHNRFLILQGEVEQIAMMKPKGQTEHDEGMLEYLEDIIGSERLKNPIQVLCRRVELLNEQRGEKLNRVKMVEKEKDALEGEKNRAIEFLALENEISKKKNLAYQYYIYDLQKRIADLEGQKQKIHEETKEVNEKSSKLAEDLKVKNKALKDVEKKLGKATKFIEDKKEKFTQLDLQDVEAREKLK…
L_oculatus_ENSLOCG00000003657_smc4	MPSKTTKSSTAAQPKKGAQPQDESADEMEVPPGEPNSDGSVAGATADAVDNRSLEEILSSIPPPPPPAMTNEPGAPRLMITHIVNRNFKSYAGEQILGPFHKRFSCIIGPNGSGKSNVIDSMLFVFGYRAQKIRSKKLSVLIHNSDKHKDIQCCTVEVHFQKIIDKEGDDYEVIPDSKFCVSRTACKDNSSVYHINGKKATFKDVGILLRSHGIDLDHNRFLILQGEVEQIAMMKPKGQTEQDEGMLEYLEDIIGSWRLKEPIQILCRRVELLNEQRGEKLNRVKMVEKEKNALEGEKNCAIEFLKLENEIFKKKNHVCQYYIHELQKKVADKETKKQKILEETKELNERNTKLAEEMKVKNKDLKEVEKKLAKITKYIEERKEKFTQLDLQDVEVREK…
M_leidyi_ML05808a	MGDSNKNENKQSDIEPDNSIEDSADEDKDTATEDKFNDTEIKMEGTEPAAVTVQERLMISKIVNHNFKSYAGTQVLGPFHKNFSCIIGPNGSGKSNVIDSMLFVFGYRSAKIRSKKLSVLIHNSEQHPNCTSCTVEVHFQMIRDINDDDYEVVSGSEFYVSRTANKSNTSTYTINGKTSTVKEVSTLLKASGIDLDHNRFLILQVCLDGMS
M_leidyi_ML161333a	MVFSMNYIRFRHECSKLIEKAQEKKTEQEAILAEVNKEAKDVFDKKTELENGMIAERKLLAKVERASEKAKKEFEEFEKRDLKVREDLKHNKAKIKKLTAKVGGEKKKLEELVDLPTKSTDELEQLQDRLRCLDEDKIRKEGELETLKQEIQPQIQKINEHREAISGELMDIKKVVNEWQSKVNISQSEMDLLTREKTKKEQQLEEARSNLERVAQSYKDETNKAKELLKTVPLNERRVNEQQDKLDQLIREEKTLTSRLSETKTKFSEAKSALNAASTRSRLLEGLLREKTAGRLPGLCGRLGDLGTISDKYDVAVSTACGALNNIVCDNMDTAQKALEFIKNNNLGIATFIALDKMEPYAAKARDPIDIPPNSHRLYDLVKQRDSKYSGAFYYALRD…
M_musculus_ENSMUSG00000034349_Smc4	MRRKGTKPSTACHQEEGPPPSQDGAEEMEQPAGEAESAAPAKPPGEELDNRSLEEILNSIPPPPPPAMASEAGAPRLMITHIVNQNFKSYAGEKVLGPFHKRFSCIIGPNGSGKSNVIDSMLFVFGYRAQKIRSKKLSVLIHNSDEHKDIQSCTVEVHFQKIIDKEGDDYEVLPNSNFYVSRTAYRDSTSVYHISGKKKTFKDVGNLLRSHGIDLDHNRFLILQGEVEQIAMMKPKGQTEHDEGMLEYLEDIIGCGRLNEPIKVLCRRVEILNEHRGEKLNRVKMVEKEKDALEGEKNIAIEFLTLENEMFKKKNHICQYYIYDLQNRIAEITTQKEKIHEDTKEITEKSNVLSNEMKAKNSAVKDVEKKLNKVTKFIEQNKEKFTQLDLEDVQVREKL…
M_virulenta_scaffold156g30t1	LFRCWGKLARSLKVILAVAERTTKNMVGEEEKENSINLANTSLNHSTRSESHGTNTRDKPRLIITKIENNFFKSYAGLQVLGPFHKSFTSIVGPNGSGKSNVIDAMLFVFGYRSRKIRSKKLSLLIHNSSKYPNVENCSVTVHFQMIYDLPGDDFEVLPGSQFSVSRTARRDGSSDYYIDQKKASFKDVGILLRKSGIDLDHNRFLILQGEVEQISMMKPMAESEHDEGMLEYLEDIIGSNRFKEPLKVLMGEVEQLNELRGEKLNRVKSVEKEKDDLEDPKNEAMEYLIMENEITRKRHILFQKYIYECSQNESRGKEKRDEVQKQLDEIHNQLKEIADGKKEKGKEHRKVVKLYEKLSKEAEEKKKAFAEFEKIDLKLREDVKYRKENGKKLEKAFQ…
M_virulenta_scaffold156g31t1	LLEKELPIEKKELEKKTNILKNVTKEEEELAEKSRQSRTKAEEAKSALQISKSRSNVLTALLGEKKAGRLKGIFGRLGDLGTIDAKYDIAISTACGPLDFIVVNTMDTAQKCVEFLKRSNVGTATFIALDKVEVWRKRATSKISTPENVPRLFDLVKVKQEEVLTAFYFALKDTLVAKNLEQATKIAYGKDKRYRVVTEIGELIEQSGTMSGGGQKAAKGRMGCSFLDDVKKEDVQILENALEVDLKKIEAIRNNKSQLEEEVSKLEKEINHKEHALEKATMEIQSLTEQKKEQGERIQSIKESIIQATPDPRHTEKLKKTVHGFEKEYNKASAASAEIEKEVQKLHKKIMDIGGSKLKGQQAQVDMVNKLIDEVTASISKANVAVKSSARNIKKSEEK…
N_vectensis_NVEC200_009079_11	MADEVDKMETEQSQNPSENTMEEDPKTPSREPRLMITKIVNENFKSYAGVQELGPFHKSFSSIVGPNGSGKSNVIDAMLFVFGYRSKMIRTKKVSQLIHNSSAHPNVASCTVSVHFQRIIDLPDDEFEVVPDSNFVVSRTARKDNSSDYHVNGRKMPFKEVAKLLRDVGIDLDHNRFLILQGEVEQISMMKPKALTEHEDGMLEYLEDIIGSSRYKEPIEELAKEVEVLNEARGEKLNRVKAVEKEKDELEGSKDEAVEYINMENGITRKRNTLFQRYIYECSQNEEKAQSKRDEVKTGFDELHKQLADCSDRKKTKGKEYKGMTKECDKLRKVAEETKENFAAYERDDLKLREDFKHGKVNGKKLQKSLEKEKEKLASLKDAPEKNQKQVEELEKKIQ…
O_bimaculoides_Ocbimv22008500mg	MVSKRRKPTAASASKEQEVDQENEMVNQDGAESTPVTHVEVPPIIESVATYSQDGPRLIISHIENYFFKSYANTQIIGPFHKCFTSIVGPNGSGKSNVIDSMLFVFGYRANKIRSKKISVLIHNSQQYPNVGSCTVSVHFQKIIDTPGEDYEVVPDSKFVVSRVAFRDNSSHYMVDGKRKTYKEIAALLRGSGIDLDHNRFLILQGEVEQIAMMKPKAENEHSEGMLEFLEDIIGSSRFKEPIEIMSKRVETLNELRGEKLNRVKAVEKEKDNLEGAKNEAEEFLSTENSITHLNNKLYQIYLNDCTTNESKATASLKELQEKADEEFKKMKTVTAEKLACSKEYDKTYKEYEALVKESDELKEQFSKLESLDVKCREDMKHTKSKAPKIEKSITQELK…
P_bachei_sb	MCGAKQLEQEIDKLKAGLQPKIAKITEQREKVSEELMEVKKVVNQWQSKVKDLAVSLPRQEKILAENTRQLEQTTKEEKALSAKLMENKARYGEAKSALNASTTRSRLLEGLLREKNAGRLPGVCGRLGDLGTIPDKYDVAISTACGRTLNNVVCDTMDTAQKALQFIKDNNLGIATFIALDKMEPFYGKSQEPINLPSNSKRLFDLVKMKDERYKGAFYYALRNTLVTGDTDSARQIAYGRDKRWRVVTLDGVMIETSGSMAGGGNTVIKGLMSKVTCDINPKEVEKMGNDIRAEEASLTKLSEGKARLDVEIRELARKIGVDKMEKQKCEQALKSHVKQQRRLEEEIPVLEKQLSDITTDETQLAALNKRLATEQLKLDEVLLVAGEKDKMIKRCEE…
P_bachei_sb	MITLGGDAELELVDTLDPFSEGIVFSVRPPKKSWKNISNLSGGEKTLSSLALVFALHHYKPSPLYVMDEIDAALDFKNVSIVAHYIKERTKNAQFIIISLRNNMFELGDRLIGIYKTHNATKTVALNPSAIAAS
P_bachei_sb	MYPTNSNPLSPQMDKLSIQPIPGDNEEQSPPFKELTEEELEGTRVKELQYEITVSEEKLAEKSPNLAIIKEYLQKVIVRSWKSSSKTFLDLPKMLTPSLLARSMVGQVG
P_lutea_plut2.m8.7413.m1	MADDVTSNEQLPRSESEEAEEAMITEQPENEANTARLMITKIVNENFKSYAGVQELGPFHKNFSSIVGPNGSGKSNVIDAMLFVFGYRSKMIRTKKVSQLIHNSENHQNVQSCTVAVHFQKIIDLPGDEYEVVPGSQFVVSRTARKDNSSDYHVNNRKVPFKEVAKLLKDCGIDLDHNRFLILQLNRVKAVEKEKDELEGSKNEAVEYLKMENSITKQRNVLFQRYICECSLNEEKAMEKRDEIKQGYDDLKKELAEFTEKKKGHTKEHKKAAKKYEELAKVVEETRKSFGAYDRDDIKLRELEELQNVPEKSQRELQKLEEKKNDLEVKRKAEEEKLAEVMAGLKTETEGLQTEKEAKETELMGWNKVVNEAKSKMDVAKSELEIYKSQHETVVNQLQ…
P_marinus_ENSPMAG00000007778_smc4	MSPMAKASTAKRRGADDFASEPLASEQAPISADAAESPEDRRTLQEILESIPSAPPAAMTNEPGAARLMITHIVNENFKSYAGKQVLGPFHKRFSCIIGPNGSGKSNVIDSMLFVFGYRAQKIRSKKLSVLIHNSEAHPDLYSCTVEVHFQKIVDKEGDDFDVIPSSEFYVSRSATKDSVSSYTVSGHKATFRDVGQLLRSHGIDLDHNRFLILQGEVEQIALMKPKAQTEHDEGMLEYMEDIIGSGRFKPAIEACCRRVEQLNELRGEKLNRVKVVEKEKDGLEAEKNNAVAFLMAENDITNLKNSLVQHKMQTARKALATEERKKADIEEASKDLKEKMAELVQAKKGKAKELQAIDKKLNKINAFIEEHKKTFVQYDLQDVKMRENLKNCASKEKK…
P_miniata_PMI_001498	MDGQIEEPMETNAESQENKENEPSPSQTDPPRSTSINTSQSSVNSAAKRPSPDEPRLMISKIVTENFKSYAGKISLGPFHKSFSCIIGPNGSGKSNVIDSMLFVFGYRAAKIRSKKLSVLIHKSEQHRNLTSCTVAVHFQKIIDTPGNDYNVVPNSTFVVSRTAYQDSSSNYYVDGKKVSFKEVTALLKLSGVDLDHNRFLILQGEVEQIAMMKSKAQTEHEEGMLEYLEDIIGSNQYKEPIEEMAKAVEQLNEERGEKLGRVKAVESEMEQLEKPMKEAQEFLKTENEITKKKHKLFSKYVQDCNVNEKKSEEKRNKVAEAFKEMKEELDKFAEDNKTKTKENKKIFKTYEKLSEIAEQKKADFAEFEQQDVKCREDLKHTKEKQKKLVKSLQKENTK…
P_naikaiensis_g31900.t1	LGVVVLQNMEVQPVLSSTRKDGGNHSRYVFKAASEKDRDDWMRAEPARAEKEGTYLCSLTSTLKSNLIMTESPNAARPRLIIHKLSLKNFKSYGGCVELGPFHKKFCCVVGPNGSGKSNVIDALLFVFGFRAAKIRLKKLSMLIHNSDASQNIQSCSVAVHFAQILDSDSDPFTVVPGSEFAVSRSAFRDNSSTYYINDRKSNYKEVRDLLKSKDVDLDHNRFLILQGEVEQIAQMKPKALTEHDEGLLEYLEDIIGTFVYKEKIHNIEIELNQLEEERKEQLKRVALVETEKNGLEALKNEAVQFLELENKTCLIRNALLQKHRADIAEKSKEVEEEYNKLKGELEERQKSQREFADVKASKESKCGELEKAIEKFEDLQRQFAEIDQKDTKHRSDIK…
R_esculentum_mRNA.RE14038	REGS697.161	MAASDNSMSSENGIDDQSKTPPKENEAPKIQQESQRLVITHIVNEFFKSYAGKQVLGPFHKSFSSIVGPNGSGKSNVIDAMLFVFGYRSKRIRSKKLSLLIHNSDQHSNVQSCTVSVHFQMIVDLPGDEFEIVPNSQFVVSRTARKDGSSDYYVDGKKKTFKEVGTLLRQSGIDLDHNRFLILQGEVEQIAMMKPKAETEHDEGMLEYLEDIIGTSRFKEPIEQLAKEVEDLSEKRKEKLERVKVVEKEKDELEGAKEEAVQFLSSENEITKLHNCLYQKYLYECKLNIEKAGKKKDEVKKQLDDIQASFKEISDQVKEKGKGRKKISREYEKLTNIAEKCQQAFTEFENKDAALRNDKVHRDREAKKLRKALEKEKEKLSDLTTEPERNNAEIERLKK…
S_callimorphus_NY_Scal100_v1244241	MADETQQQPEAEQSQNSQEMTMEEDPKTPTREPRLMITKIVNENFKSYAGIQELGPFHKSFSSIVGPNGSGKSNRIIDLPGDEYEIVPGSNFIVSRTARKDNSSDYYVNGRKMPFKDVAKLLREVGIDLDHNRFLILQGEVEQISMMKPKALTEHEDGMLEYLEDIIGSSRYKEPIEGLAKEVETLNEARGEKLNRVKAVEKEKDELEGSKDEAVEYINMENNITRKRNTLFQRYIYECSKNEQKAQEKLNEVKAGFGDLHKQIEECSGNKKTKGKENKKISKQYDEIAKVAEETKKNFAAYERDDLKLREDYKHAKQSSKKLQKNLEKETEKLANLKDDPEKQQKKVEELSKKLEELEVQKNNEEAKLAEIMAGLKHETEGLQNQKESREEELMEKNK…
S_callimorphus_NY_Scal100_v1261471	MITKIVNENFKSYAGIQELGPFHKSFSSIVGPNGSGKSNVIDAMLFVFGYRSKMIRSKKVSQLIHNSSSHPNVTSCTVFVHFQRIIDLPGDEYEIVPGSNFIVSRTARKDNSSDYYVNGRKMPFKDVAKLLREVGIDLDHNRFLILQGEVEQISMMKPKALTEHEDGMLEYLEDIIGSSRYKEPIEGLAKEVETLNEARGEKLNRVKAVEKEKDELEGSKDEAVEYINMENNITRKRNTLFQRYIYECSKNEQKAQEKLNEVKAGFGDLHKQIEECSGNKKTKGKENKKISKQYDEIAKVAEETKKNFAAYERDDLKLREDYKHAKQSSKKLQKNLEKETEKLANLKDDPEKQQKKVEELSKKLEELEVQKNNEEAKLAEIMAGLKHETEGLQNQKEGE…
S_mediterranea_SMU15002426	MENEYRKITEEIAKLKEIEKKLKSEVDQLNHLLKSRQSKETEHKVLSFLMNQQSSGKLKGVIGRLGNLCAISPKYDVAVSTACTRLDSIITEDINDAQKCVELMKLHKIARSTFIGENLGLIENRLLSVGFQD
S_mediterranea_SMU15006150	MDENIDPNFINELNLIIVEEAPEPTLSYDVHGPRLIISKIHNENFKSYAGTRILGPFHRNFAAVIGPNGSGKSNVIDSLLFVFGFRASKIRSKKLNVLIHKSEYFPNIQSCTVKVYFHRIKPTDGNDFEVIPNSDFVVSRTAFKDNSSYLKINDKKASTKEVTQFLKNQGIDLDHNRFLILQGEVEQIALMKPKALTEYEDGLLEYLEDIIGSHRFKEPLQILFQRLEELCELRQEKLNRVKVVGKEKKELESVRNEAVKYLRLCNEIVIRKNISFQLKLRELLTLEETAVEKQNEVKAELDQISSEIVKVTELRAEKEKELKKTTQLHIMKAQQYEISQKKFHDLEVEDTALRDKRKHCRKKLDEIATTIKLREKEIIKYQNVPEESVARIEQMTNDI…
S_purpuratus_LOC592992	MPVLTEASPPKAEPEGEAESQPMDTNESIPQEPTPAPTAQPRLMITQIMTENFKSYAGKVVLGPFHKSFSCIIGPNGSGKSNVIDSMLFVFGYRAAKIRSKKLSVLIHKSENHKDLKSCTVAVHFQKIVDTAGDEYEVVPNSQFVVSRTAHKDNSSSYYLDGKKVNFKECTALLRKAGVDLDHNRFLILQGEVEQIAMMKPKAQTEHEEGMLEYLEDIIGSNQFKESIEELAKKVEELNEERGEKLTRVKAVESEMEELEKPMKEAQEFLKTENEVTKKKNKLYQKYISECNENEAKAQEKRKAVQDGMKEMEEGLKTMALQNKEKIKEHKKLYKQYEKLAEVAEQKKADFAEFERQDVKCREDLKHTREKQKKLVKNLQKEKTKLEGLLKVPGDSEIE…
T_adhaerens_TriadG50834	MKPNMAAITEYFRKEEVYLTRVSELDEITEQRNERRRELDQLKKERLDMFMHGFEIISSKLKEMYQMLTLGGDADLELVDSLDPFSEGIAFSVRPPKKSWKNISNLSGGEKTLSSLALVFALHHFKPSPLYVMDEIDAALDFKNVSIVANYIKERTKNAQFIIISLRNNMFELADRLIGIYKTDNATKTVVIDPRKIAAA
X_tropicalis_ENSXETG00000008717_smc4	MSSVATMPPRKTKTAVAREATESPMDESVSVAQAGQAEAESHNEVVDNRSLEEILSSIPPPPPPAMTNEAGAPRLMITHIVNQNFKSYAGERILGPFHKRFSCIIGPNGSGKSNVIDSMLFVFGYRAQKIRSKKLSVLIHNSDEHKDVQSCTVEVHFQKITDKEGDDFEVIPNSNFYVSRTAYKDNSSVYHISGKKATFKDVGLLLRSHGIDLDHNRFLILQGEVEQIAMMKPKGQTEHDEGMLEYLEDIIGSQRLKEPIQILCRRVELLNEQRGEKLNRVKMVEKEKDALEGEKNKAIEFLTVENETFKKKNQLCQYYIHDLQKRSRDMEAQKEKIQEDTKEISEKSNTLLETMKEKNKGLKDVEKQLNKITKFIEENREKFTQLDLQDVDTREKLKH…
M_brevicollis_MONBRDRAFT_7883	MITHMRMENFKSYLGVQEVGPFHQCFSSVVGPNGSGKSNVIDALLFVFGYRAKKIRQAKLKDLIHKSEGHTNLDSCRVSVFFSEVIDKPDGSYETVPNSEFVVMREATSANQSNYYLNGKKMTFKEIGTLLRAKGIDLDHNRFLILQGEVESIAMMKPKAQHENDDGLLEYLEDIIG
M_brevicollis_MONBRDRAFT_25081	FKEDIVKDETQLAELNEQRSEKLARVKVVETEKNKLEGGKNEAEAYLGEENELTMLQSKLYQLFQFQSTKQLEDAQTKLNEVNESASEQRAQLAALQKDVKIKEQELKVEQKQVNQLQTACEQAKADFIAFERKDIKHKEEHKFLKNKIKKLTASIAKDQKQLNQEASRDVALEEDRGRWQEELQASQQQLDSEEKSLEEMLEGLQGEMQAQQDELATRQAALAPFSQARAEAKANLEVKQGELELLTRSSRELAQTLESAQQSQQQAEADEETKTQALAEVQQEEAKVLKQLGKAKKELANVEAQLAPLEQSCNAKRVTLEEARAASSSSRAQSAVLVALKRFAAKNNLSGFHGRLGDLGTIDDAYDVAVTTACGALNNMVVDTAREAKLCVEFLRKH…

## Sheet: Sheet5
Sequence Name	AA Sequence
A_millepora_amil.1.2.5551.m1	MYIKQVVIDGFKSYAQRTTVSGFDPQFNAITGLNGSGKSNILDSICFLLGISNLSQVRANSLQELVYKGGQAGVTKATVTITFDNTDKKQSPLGYETFDEITVSRQVVIGGRNKYLINGCNANNTRVQDLFRSVQLNVNNPHFLIMQGRITKVLNMKPPEILSMIEEAAGTRMYESKKQSAQRTIEKKDSKLQEIETILAEEITPTLTKLKEERASYLEYQKVMREVEHLSRLYIAYQFVMAEEVQKKSSTELEEMKEGIKKLQERHEEIEVRVKELGAVIAELEKKRSLESGETIAKLEKKFDSLSKIDVKANSDLKHAKELLAAEKKNKKTLEKNIVDDQSQLHTKEKELKNLRDLLVKLEEKSQEDNKAVKAAQDHFHAVSAGLSSNEGGEDKTLA…
A_queenslandica_Aqu2136075	MFIKSIVIDGFKSYAHRTEVGPFDPQFNAITGLNGSGKSNILDSICFLLGISNLSQVRAGSLQELVYKGGQAGVTKATVTITFDNSDKKQSPVGYDSFDEITVSRQVVIGGRNKYLINGSNAPPTRVQDLFRSVQLNVNNPHFLIMQGRITKVLNMKPVEILSMIEEAAGTRMYESKKISAQNTIVKKDTKLSEIDKIIGEEITPTLKKLKEERSSYLEYQKVSRELEHLCHVVIAYSFVKAEERRKVLVVELETAKSAVAHCNEMSIEINESIVEVKSAIKDIRKQRDEEHDGPLGDLEKKSDLTTKALALAESTLKHTQTQIASEQKSYAELQKSLKDDEDLISKRRTEAAECQKLCDSLKQKLIDAQQTLANSQKHFQAVSSGLSGSSDGQAESLS…
A_vaga_GSADVG00002005001	MHIREIVLEGFKSYATRTTVGPFDEHFNAITGLNGSGKSNILDSICFVMGITSLSQVRAQALSDFIYKQGTAGVTRASVSIMFDNRNKEQAPDGYKMFDELTVTRIVESNKSKYLLNGKNATQSAIHDLFKSVSLNVNNPRFLILQGQVTKVSKSKPQEILGLIEEAAGTRMYDQKKAEALKTIAKKDDKLKEIRTTIDTDITPTINKLQQDEQNYKMYTELKKRYKLVNDQLIAYEYWQLITSVKQTETDVENMEEQTDEYQKRNGVISEEIQQIHTEVKSIEKERNENVGNEVSELQTELRTLTNENDRLTKQLSQYKQQLTDSEQQHKQLTNSIEQLEKDIDSSREELGELDKKVLTDTEHVKQLQRRHEAVSTGTAVVGSDSRLTNKEKLDKYKE…
Aurelia_Seg29632	MYIKNIVLDGFKSYAQRTEVSGFDFNFNAITGLNGSGKSNILDSICFLLGISNLHQVRASSLQELIYKNGQAGVTKATVTITFDNTDKKQSPIGYDSFNELTISRQIVLGGRNKYLINGSNANNQRVQDLFRTVQLNINNPHFVIMQGRITKVLNMKPVEILGMIEEAAGTKMYESKKQSALRTIEKKQSKLTEIEKILSEDITPQIAKLKQDRSNYMEYQKVMREIEHLRKLCIAYEFLRAEEMKKSSGTELEAMMENKKQLEERFKEIEVSVNMINEHVKELQQQKDAQSGGVLKELETKVNELSKTDVKVNSDLKYAKEALKGENKRKKEMEKNIADDEAQLKAKGKEISKREDGLKKLEDKSNADAEAIAAAQKHFHAVSAGLSSNADGEDKTLA…
Aurelia_Seg3453	MMKNAKQHREKELKKAEDEMTKAKQRAENSMKEFKAKEQEIVEMRLEVEELQNEIKSLQEQLKSFDESMAKLQEDVDSQDAKAKESKATLDEAKEELKKQKNNLKACSQAIGEKVKEQNELAKEASDVQLKLKELEYDISKNKKDSNDAAKRVENMLAKHDWISTEKEYFGQANTAYDFTATDPKEAQRKLVKLEETKDKLSKNVNMRAMTMLGKAEEKDFGSIYSTLLPGTNAKLSPPEGQSVLDGLEIKVAFGNVWKESLTELSGGQRSLVALSLILALLLFKPAPIYILDEVDAALDLSHTQNIGHMLRTHFKHSQFIVVSLKDGMFNNANVLYKTRFIDGVSTVTRYTQNNSGSKDTSKTLQTDRRQPQTSQARPRQK
B_lanceolatum_BL14561	MHIKEVVIDGFKSYAQRTVVSGFDPLFNAITGLNGSGKSNILDSICFLLGISNLSQVRAGSLQELVYKSGQAGVTKATVTITFDNTDKKQSPVGYESYDEITVSRQVVIGGRNKYLINGSNASNTRVQDLFHSVGLNINNPHFLIMQGRITKVLNMKPPEILSMIEEAAGTRMYESKKQSAQKTIEKKDAKLTEINTILEEEISPTLTRLKEERSNYLEYQKVLREIEHLSRLHVAYQFFCAEETQKRSAEELAEMTDNIKQFQQRQQEIDQKIAKINESVQELEKKRDEETGGQIQTLETRLGDEQKNDAKAQSSLDNKKETLNSEKKKKKDITKSIDEDNTALKTKEKEVEKLAAAQQKLEEQAKEDADAHTAAQKHFQAVSAGLSSNDEGEDATLA…
B_mori_BGIBMGA004765	MFIKSIVLDGFKSYGNRVEITGFDPEFNAITGLNGTGKSNILDSICFVLGITNLSNVRASSLQELIYKHGQAGITKATVSITFDNRDKRQCPIGYENHDEITVTRQVVMGGKNKYLINGINVQNKRVSDLFCSVQLNVNNPHFLIMQGRITKVLNMKPPEILSMVEEAAGTRMYEAKKQAAQKTIEKKDAKLRELNDIIREDIAPKLQKLQDERSQFQEYQKVVRELENITRLCVAWKYVSAEEQTKAAEGKVTQVQDDIKLKKETIKNNEKEMKELDKQVVDLNKKLDEESGNVLKDLEVELQNLEKVEAAASSQYKGSKEALSGHEKRVKLLEKALAEDEQALTSKQQILNEVSSTFENLRTSSETSEKALAEAQQKFLAVSTGKEDASESLQDQLM…
C_cruxmelitensis_g769.t1	LDKTKVDFNEDRFGELTTQKCGLESEVSTLQEEIDEMESRFPQLQFYYKDPQPNFKREKVKGLVCRLIKVKDVKMATGLEVTAGGKLFNVVIDTEQTGKELLQKGELKRRVTFIPLNKISARSVDAKVVSQAKSLVGEANADTALSLVGYEKDIEAAMKFVFGSTLISSDLDRAKSVAFKLKTKTVTIEGDVFDPAGTLSGGARKQGSSILEKLNELQHIQDNLKQKKAQLSKVEQQLTAMQKAAKKNEEIVKQLELKLREVELVQKTLSSTVHHSKIEEIQSLENAIGDQQKLITSAESVIEQATKKASDLESKMEEAKSHRNKELTNAENAISESKAKADQSKKAYKLKQQEMKELRLETEELTSEMKNLEEQMKATQDNIDSTMRNKESLEEKSLE…
C_cruxmelitensis_g1774.t1	ERSSYLEYQKVIRELEHLTRLSVAFEFVKAQLGERVKEIEIEIKDLQKKKDMESGGALKEGEKKLDEMMKNDVKLSSDVKHANDLFNAEKKKETDLKKQFTEVLLLQE
C_elegans_WBGene00003367_mix1	MHIKSIHLDGFKSYQKHTDILDFSPTFNAITGYNGSGKSNILDSICFIMGINKLDNIRAKSMHELISHGGTKAIVQVRFDNTDKRCSPFGMEHLDEIVVQRIITAGCATSYTLNGHAATNGKMQDFFRGVGLNVNNPHFLIMQGRITTVLNMKPEEILGMVEEAAGTKMYDQKKKDAEKTMFLKDAKLKEVDRIFQSSIDPRMVKFREDRKNMVEVTRLKKLKENFSRKYEAFQYFQTCEAVKKSAKEIEDAKKGIEDLGEKFNQLDLDLKNKEDEKKKMEESRDEEAALSAAHLSKQSIMLQKETVKNQLVETINKLKKEGEQINKSLSKDREVLDAKRKEHEDSKAANSKDIQSQSDDEALVTKYRNDLESLTRGTIANDKGEHVSIESEIQSCKST…
C_hemisphaerica_asmbl_9396	ESGNVLKELEKRVDELSKIEVKATSDVKHANESLNAEKKKLRQLQKNNTDSTSQLQSKEKLIEKLEHQISSFEERNTADAQAVTKAQDHYHAVSAGLSSNDDGEDKTLADQLMECKNAISKADTEIKQAQIKLKHEEGELKKKQADLKSTEKGYEKDKVAFEAMKKDLTKIENQLKTLNYRDGQEDELIARKRKLSQEVSRLQNIVETLEARFPQLQFEYHDPEPRFDRRKVKGLVANLINIKDVKYATALQVTAGGRIYNVVVDTDRTGKQLLQNGRLQRKVTLIPLNKIAARSISDTVVQSAKSCVGAANVDTALSLVGYDKEIEGAMKFVFGSSFVAADLNSAKKVAFDPNVKTRTVTLDGDVFDPSGTLSGGARRQQQSILASIQELQDARTELS…
C_hemisphaerica_CLYHEMG015106	FFTLQILSMIEEAAGTRMYESKKQQAIKTMEKKQSKLNDIEAVLNEEITPTIKKLKEERSSYLEYQKVMRVIEHLTRLYVAYEFTKAEEFKEKAGSELEKMNEAISTLSARNQEISKEIARIDGEIDELQRKKDEV
C_intestinalis_ENSCING00000000171	MYIKSVTVDGFKSYAQQTDIKGFDPLFNAITGLNGSGKSNILDAICFLLGITNLSQVRATNLQDLVYKNGQAGINKATVCITFDNSNKEQSPMGMEAHNEITITRQIVIGGRNKYLINGVNAQNSRVSDLFRSVGLNVNNPHFLIMQGRVTKVMNMKPPEILSMIEEATGTSMYESKKDSAQKMIEKKENKLNQINRTLDEEITPTLQKLHDERSSYLEFQKVQREVERLSRLLIAHQFVSVERIANNASGEIEEMDEEKEKLEQEFHRLQEKYHSMGRDITDLENVLDKDSRAKVELESSLGREEKIEAKVQSNLANQREVINSEKRKLKGLSKSKSECESAIRNKTKALENLRLLCEKAEHESSKMNEEYAAAEKHFQAVTTGLATSDTGEEASWQA…
C_milii_ENSCMIG00000009841_smc2	MYIRSIILEGFKSYAQRTEINGFDPFFNAITGLNGSGKSNILDSICFLLGISNLSQVRASNLQDLVYKNGQAGITKATVSITFDNSDKKQSPLGFETHDEITVSRQVVIGGRNKYLINGVNANNTRVYDLFCSVGLNVNNPHFLIMQGRITKVLNMKPPEILSMIEEAAGTRMYECKKLAAQKTIEKKESKLKEICTILEEEITPTVQKLKEERSSYLEYQKVMREIEHLSRLYVAYQFVCAEETKLRSAEDLKEMQESIIQLQQIITDGEKKVKEISKEVSELEKIRDKEVGGVLQSLEEAVNEAHRKDVKVQSSLDHKKDSLKAEEKKRNVIVKSMEEDATALSTNEKEVKKISDELKSLQETSCQDGEALAAAQKHFNAVSAGLSSNEDGEAETIA…
C_xamachana_jgi.Casxa1.24480	MFIQSIVLDGFKSYAQRTEVSGFDCNFNAITGLNGSGKSNILDSICFLLGISNLSQVRASNLQELIYKNGQAGVTRATVTITFDNTDKKQTPIGYESFDEITISRQIVLGGRNKYLINGCNANNTRVQDLFRSVQLNINNPHFLIMQGRITKVLNMKPVEILSMIEEAAGTKMYESKKQSALRTMEKKESKLSEFEKILNEDITPTISRLREERSSYMEYQKVIREIDHQRKLCIAYEFLKAEADVKVNSDLKHAKETLQAEEKKKKEINRNISDDEAQQKAKQKDIAKLEEALKIFEEKCKSDEEAIAAAQKHFHAVSAGLSSNADGEDKTLADQLMDCKNLISESETEIKQAQMKLKHSEKQSKIEAEMGKLDFEEGKEIEFAATVSNLEKEVQQLC…
C_xamachana_jgi.Casxa1.24481	MINHANGFSGGSATLTSSYSYTPVSFDKDIQAKSVTLEGDIIDPAGTLTGGARAQRASVLEKLEELMKAEESLEEKQTVLQDAKKELGLLKKKADEFNRLKQQFDLKSRENELVQERLKQTEDDMNKVKQKAEGTMKEFKKKEQEIIEMRLEVEELQNEITSLQEQTLSTWR
C_xamachana_jgi.Casxa1.24482	MIFVSDKYTLLTLNTFSHFLKLCEAIACQKLDALKDELKKKKEELKACNQAIAAKVSEQNDLAKEAKAVQIQLKELEYDISKNKKDSQDAAKKVEQMLAKHDWIATEKQYFGQPNTAYDFEATDPKEAARKLSKLEETRDKLSKNVNMRAMTMLGKAEEKHNDLLKKKKIVENDKLKITEVIKELDMKKNDALQKAWEQVNKDFGSIYSTLLPGTNAKLSPPEGGTVLDGLEIKVAFGNVWKESLTELSGGQRSLVALSLILAMLLFKPAPIYILDEVDAALDLSHTQNIGQMLRSHFKHSQFIVVSLKDGMFNNANVLFKTRFIDGVSTVTRYTQNNSGSKEIDTAKTQGRRPPQKPGKRPKLC
D_melanogaster_FBgn0027783_SMC2	MYVKKLVLDGFKSYGRRTEIEGFDPEFTAITGLNGSGKSNILDSICFVLGISNLQNVRASALQDLVYKNGQAGITKATVTIVFDNTNPAQCPQGYEKCREISVTRQVVVGGKNKFLINGKLVQNKKVQDFFCSIQLNVNNPNFLIMQGKIQQVLNMKPKEVLSMVEEAAGTSQYKTKRDATKTLIEKKETKVRETKVLLDEEVLPKLVKLRQERSAYQEYQKICRDIDFLIRIHISAKYLKQCETLKTVEANEHKIEDRIANCKATHAKNLAEVESIENSVKEMQQQIDAEMGGSIKNLETQLSAKRALEATATGSLKAAQGTIQQDEKKIRMASKNIEDDERALAKKEADMAKVQGEFESLKEADARDSKAYEDAQKKLEAVSQGLSTNENGEASTLQ…
D_pulex_DAPPUDRAFT_187038	MYIKSMVVDGFKSYGQRTEINGFDPMFNAITGLNGSGKSNILDAICFLLGITNLSHVRATNLQELVYKSGQAGVTKATVTVTFDNKDKKQSPIGYEHYDEVTVTRQVVIGGKNKYLINGSNVQNNRVQDFFRSVQLNVNNPHFLIMQGRITKVLNMKPPEILAMIEEAAGTRMYEAKKQQALKTIEKKEEKIKEINDILSEEVTPTLNKLREERTQYLQFQKSERELEHLNRQYVAYRFLSLEKANAQVKEEYNEILKEKTNHCATEEKLKNEIEALEKEIHTLQHQRDQVGGKELTQLEEKLRVQEKAESKAQSAVKVLKENIKAEEKRKKELKKSLDDDTAALESKEVEESKLGETFEKLRQTEQQDSEALTAAQKRFQEISSGLLASDNGAAATLP…
E_diaphana_XP_0209016062	LFHVVVDNEVTSKKLLQKGQLQRRCTIIPQNKISTRSLSNNVIAKAEDLVGKENVNLALSLVGYEDEVKTAISSIFGTTFICETEEQAKKVTYDPKVKSKTVTVEGDIFDPSGTLTGGKLNQLILKKXSLLIRVS
E_diaphana_XP_0209114592	MYIKQVTIDGFKSYAQRTVISGFDPLFNAITGLNGSGKSNILDSICFLLGITNLSHVRAGSLQELVYKGGQAGVSKATVTITFDNSDKKQSPVGYDSFDEITVSRQVVIGGRNKYLINGCNANNQRVQDLFRSVQLNINNPHFLIMQGRITKVLNMKPPEILSMIEEAAGTQMYESKKLSAMRTIEKKENKLQEIETILKEEITPTLKKLKEERADALEYQKVMRELEHSTRIYVAYQFSTAEELSTKSGKVQEEEQEKKAEKIKQMDEREKKIKXIDAEIEELEKKRSGESGATLKNLENKLDEASKIDVKAISDLKHARESLTTEKRKKKDIEKSRSDDQKHFTMKEKEVEKLYNMLKKLEEGSKKDEESVRLAQEKLHAVSAGLTTTNNQTLADQI…
E_muelleri_Em0011g977a	MYIKQVVIDGFKSYAQRTEIVGFDPLFNAITGLNGSGKSNILDAICFLLGISNLSQVRASNLQELVYKSGQAGITKATVTITFDNSDKKQSPLGYETYDEITVSRQIVIGGRNKYLINGSNATPSRVQDLFRSVQLNVNNPHFLIMQGRITKVLNMKPPEILAMIEEAAGTRMYESKRAAAQKTIEKKDSKLKEIETILEEEITPTLRKLKEERSSYLEYQKVVRELEHLSRLTVAFQFAEAEKCCKQSSTDLEGMKAEIEVHKSQIAESDVKLQELEGAKKELETKQSEESSGPIQELEKRLDDCAKSNALAEATLKNSKDSLANEQKVLKGLKKGFDEDQSVLETKSAELQAMEGAHTDLHGRSKAAEKAVLAAQHHFQAVTAGLSSNADGQDETLA…
E_muelleri_Em0011g979a	MIKTSDDFYRNGCDNCERHLRVKGNKDAVQECTSSNFDGIIAMMAPEDSWVARWQRIDKLAKGCYAISVSGELPQDIIDSLQDKFPQLQFEYQDPVPGFNKEKVKGPVAKLIHVKDVSAATALEVAAGGKLYNIVVDNEHTGKQLLEKGRLKRRFTIIPLNKIAGKSINDGVVRKAQSLVGRDKVHPAISLVGYEEELQPAMEYVFGSTFVCDTLQNAKKVTFDKQVSVRSVSLAGDVFDPSGTLSGGSRPQTVPILTRLQELLECEQLLEAKAAELEVVMAELQNVQKVAGRYKELKEQREAKSHDLELIRTRINQSTHHQQMVELQTLKDTIAHQKELLKATEETEKRAKQQLQDIQKKMKESKSHQERELKEAEEALARARQEAEGVVKEAKGRDQ…
G_gallus_ENSGALG00000015691_SMC2	MYIKSIVLEGFKSYAQRTEIRDFDPLFNAITGLNGSGKSNILDSICFLLGISNLSQVRASSLQDLVYKNGQAGVNKATVSITFDNSDKKNSPLGFENNDEITITRQVIVGGRNKYLINGMNASNNRVQDLFGSVGLNVNNPHFLIMQGQITKVLNMKPTEILAMIEEAAGTRMYECKKITAHKTIEKKESKLDEIRRIITEEISPTLEKLKEARASYLEYQKMTREVENLRRIYVAFQYVRAEEIKDRSTNALKEAQANKKKIFESMAENEKKVKELAQQIEETEKKNNEEFGAKLHSLEAAFSELQRVDAKVRSDLDHRKQNLNSEENRLKELIKIMQEEFKAFTSKEKEIKKIKEGLNGLQEESKKDAEALASAQQHFNAVSAGLSSNDSGQGTSLA…
H_circumcincta_TRINITY_DN61_c0_g1_i1.p1	VLDGFKSYAQRTEVNGFDPLFNAITGLNGSGKSNILDSICFLLGITNLTHVRAANLQDLIYKSGQAGVSKATVTITFDNKDKDQSPVGYEAFDEITISRQIVLGGRNKYLINGSNAHNARVQDLFRSVQLNINNPHFLIMQGRITKVLNMKPPEILSMLEEAAGTRLYETKKQQAYKTIEKKQNKLQELDSILTDEIMPTIKKLKEERSSYLMYQKVTRDIEHLSRLCIAYEFVRAVEIKTKSTSELETLNASIEKLKNRNSEIDSEIKRIDKEVSQLQMKKDAESGNLLKELEKKLDEVSKIEVKASSDVKHAKDSLNSEVKKIKQNEKSIAENEAQLATKEKQIVNLQAAITKLEQNTNSDAAAVTEAQNHFHAVSAGLSSNKDGEDKTLTDQLMDC…
H_echinata_TRINITY_DN42396_c0_g1_i1p1	MYIKSVILDGFKSYAQRTEVNGFDPLFNAITGLNGSGKSNILDSICFLLGITNLSHVRATNLQELIYKSGQAGVTKATVTITFDNTDKKQSPIGYETFDEITISRQIVLGGRNKYLINGCNANNTRVQDLFRSVQLNVNNPHFLIMQGRITKVLNMKPPEILSMIEEAAGTRMYESKKQQAIKTMEKKQSKLNEIESVLHEEITPTIKKLKEERSSYLEYQKIMREIEHLTRLCVAYEFVKAQDIKQKSSSELETMTNTINVLKERSVEIDQEIAVIDAEIVKLQKQKDAESGNVLKELEKKLDEVSKIEVKASSDLKHAKDTLNAEKKKKKSLEKNITDNNSQMEAKGKSSNKLKNNLEALEEKSKTDAELVTDAQNHYHAVSAGLSSNDDGEDKTLA…
H_miamia_HMIM007206	MNIQNNTMQICRFLGASVIVAGANKTVIVSVLPLLADYRHVSYVFVGISSAIYISGILANISKVKDHTMCVLYIVFVCLTGALMIFLSYSTIQDKTVFTLTCFDRFLTGAIEFTFSFPIITSLFPRLATMMGLFDGLGALSGPMIGSLAAVVTTYPSLSFALLGILQIVLVLTLVKLLTTEFPRRDVDASSNNIQLKKGMSSANQKFSQLKFEISDRENEKSNALEQIESLTKSIDSLNENVTTLKGKLDEIKVIVKECKASLDEHRESLKACNKEISAKTKAVNSLSKQVSNNQLKLKEIQHKIENLQKESHEAKKKVEYIQAKYHWVVKEKEFFGKPNTSYDFKSQDMSSISSKLNRLRSQKDVLSKSVNMRAMTMLDKAEEKYSDLTSKVKIVEND…
H_miamia_HMIM007209	MYIKEVIIDGFKSYAQRTVVEKFDRQFNAITGLNGSGKSNILDSICFLLGLTNLSQVRATNLQELIYKNGQAGVTKACVTIKFDNRDKNQTPLGFEHCDEITVSRQIVVGGKMKYTINGVNATSQRVTDMFQSVQLNVNNPHFLIMQGRVTKVLNMKPREILSMIEEAAGTRMYETKRESARRTIEKKESKLKEIESILSEEIVPKLSKLKEERASYLEFQKVNREIEHLAKLEIACQYVSAVEKENSAIGDVDENKRIHCEISDIIAELNSEIESIGKEIQELERKKDADSGAKLRALEEKFRENEKEEASIQSNLDNALRSVKSEDKKLKDLKKSSAEDEKALSSKMLEIEQLQNSFESFKKAEEDALAALERAQKALQDVNSGKFINESGDTATLL…
H_oligactis_c62765_g1_i1.p1	MYIKNIVLDGFKSYAQRTEVNGFDPLFNAITGLNGSGKSNILDSICFLLGITNLTHVRATNLQDLIYKSGQAGVSKATVTVTFDNKDKDQSPVGYEAFDEITISRQIVLGGRNKYLINGSNAHNARVQDLFRSVQLNINNPHFLIMQGRITKVLNMKPPEILSMLEEAAGTRLYETKKQQAYKTIEKKQNKLQELDSILTDEIMPTIKKLKEERSSYLMYQKVTRDIEHLSRLCIAYEFVRALEIKSKSSSELETMDASIVKLKNRNSEIDIEIKRIDKEVSQLQMKKDADSGNLLKELEKKLDEVSKIEVKASSDVKHAKDSLNSEVKKIKQNEKNISENEAHLASKEKIVAELRVALTTLEQNNVNDIAAVTEAQNHFHAVSAGLSSNKDGEDKTLT…
H_sapiens_ENSG00000136824_SMC2	MHIKSIILEGFKSYAQRTEVNGFDPLFNAITGLNGSGKSNILDSICFLLGISNLSQVRASNLQDLVYKNGQAGITKASVSITFDNSDKKQSPLGFEVHDEITVTRQVVIGGRNKYLINGVNANNTRVQDLFCSVGLNVNNPHFLIMQGRITKVLNMKPPEILSMIEEAAGTRMYEYKKIAAQKTIEKKEAKLKEIKTILEEEITPTIQKLKEERSSYLEYQKVMREIEHLSRLYIAYQFLLAEDTKVRSAEELKEMQDKVIKLQEELSENDKKIKALNHEIEELEKRKDKETGGILRSLEDALAEAQRVNTKSQSAFDLKKKNLACEESKRKELEKNMVEDSKTLAAKEKEVKKITDGLHALQEASNKDAEALAAAQQHFNAVSAGLSSNEDGAEATLA…
H_viridissima_scaffold11g140t1	MLEEAAGTRLYETKKQQAYKTIEKKQNKLQELDSILTDEIMPTIKKLKEERSSYLVYQKVTRDIEHLSRLCIAYEFVRSVEIKSKSTSELESMNASIEKLKERNSEIDTEIKRIDGEVANLQKKKDAESGNLLKELEKKLDEVSKIEVKSSSDVKHAKDSLNSEVKKIKQNEKNISENEVQLASKEKMVTNLQTALTKLEQTTIADMAAVTEAQNHFHAVSAGLSSNKDGEDKTLTDQLMDCKNIISKSETEVKQAQIKLKYEESELKRKSELLSTTAKDYQKDKSLHDALNTEIDKIKAQLSKLNYEEGRDESLLQQRRQLQGEVSKFQTIVETLESRFPHLQFQYSDPQPNFDRTKVKGLICNLIKVKDISYATSLQVSAGNKLYNVVVDTEKTGKL…
H_vulgaris105_g1399.t1	GFLKDVIFDDISNFVKRTEVNGFDPLFNAITGLNGSGKSNILDSICFLLGITNLTHVRATNLQDLIYKSGQAGVSKATVTVTFDNKDKDQSPVGYEAFDEITISRQIVLGGRNKYLINGSNAHNARVQDLFRSVQLNINNPHFLIMQGRITKVLNMKPPEILSMLEEAAGTRLYETKKQQAYKTIEKKQNKLQELDAILTDEIMPTIKKLKEERSSYLMYQKVMRDIEHLSRLCIAYEFVRALEIKSKSSSELETMDASIEKLKNRNLEIDVEIKRIDKEVSQLQMKKDADSGNLLKELEKKLDEVSKIEVKASSDVKHAKDSLNSEVKKVKQNEKSISENEAQLATKEKMVADLRVALTKLEQNTINDMTAVTEAQNHFHAVSAGLSSNKDGEDKTLT…
H_vulgaris105_g1399.t2	GFLKDVIFDDISNFVKRTEVNGFDPLFNAITGLNGSGKSNILDSICFLLGITNLTHVRATNLQDLIYKSGQAGVSKATVTVTFDNKDKDQSPVGYEAFDEITISRQIVLGGRNKYLINGSNAHNARVQDLFRSVQLNINNPHFLIMQGRITKVLNMKPPEILSMLEEAAGTRLYETKKQQAYKTIEKKQNKLQELDAILTDEIMPTIKKLKEERSSYLMYQKVMRDIEHLSRLCIAYEFVRALEIKSKSSSELETMDASIEKLKNRNLEIDVEIKRIDKEVSQLQMKKDADSGNLLKELEKKLDEVSKIEVKASSDVKHAKDSLNSEVKKVKQNEKSISENEAQLATKEKMVADLRVALTKLEQNTINDMTAVTEAQNHFHAVSAGLSSNKDGEDKTLT…
H_vulgarisAEP_HVAEP1_T013016.1	MYIKNIVLDGFKSYAQRTEVNGFDPLFNAITGLNGSGKSNILDSICFLLGITNLTHVRATNLQDLIYKSGQAGVSKATVTVTFDNKDKDQSPVGYEAFDEITISRQIVLGGRNKYLINGSNAHNARVQDLFRSVQLNINNPHFLIMQGRITKVLNMKPPEILSMLEEAAGTRLYETKKQQAYKTIEKKQNKLQELDAILTDEIMPTIKKLKEERSSYLMYQKVTRDIEHLSRLCIAYEFVRALEIKSKSSTELETMDASIEKLKNRNLEIDVEIKRIDKEVSQLQMKKDADSGNLLKELEKKLDEVSKIEVKASSDVKHAKDSLNSEVKKVKQNEKSISENETQLATKEKMVADLRVALTKLEQNTINDMTAVTEAQNHFHAVSAGLSSNKDGEDKTLT…
H_vulgarisAEPlrv2_t27543aep.p1	MYIKNIVLDGFKSYAQRTEVNGFDPLFNAITGLNGSGKSNILDSICFLLGITNLTHVRATNLQDLIYKSGQAGVSKATVTVTFDNKDKDQSPVGYEAFDEITISRQIVLGGRNKYLINGSNAHNARVQDLFRSVQLNINNPHFLIMQGRITKVLNMKPPEILSMLEEAAGTRLYETKKQQAYKTIEKKQNKLQELDAILTDEIMPTIKKLKEERSSYLMYQKVTRDIEHLSRLCIAYEFVRALEIKSKSSTELETMDASIEKLKNRNLEIDVEIKRIDKEVSQLQMKKDADSGNLLKELEKKLDEVSKIEVKASSDVKHAKDSLNSEVKKVKQNEKSISENETQLATKEKMVADLRVALTKLEQNTINDMTAVTEAQNHFHAVSAGLSSNKDGEDKTLT…
L_chalumnae_ENSLACG00000000609_SMC2	QEVAALVLELEELKREQVSYQQQIEAVDEAITSYQGQIDGMASEVAQNKEAVKKAQEDLSKQKEAIQAQDNEIKTKSAEAARLGEQSKELQLKIKELEHSISKHKRESADAAAKVSKMLKEYEWIEAEKRLFGQPNTAYDFKTNNPKEAGQRLQKLQEKKEKLGRNVNMRAMNMLTEAEERYNDLMKKKRIVENDKSKILATIEELDQKKNEALNIAWQKVNKDFGSIFSTLLPGANAMLAAPEGKTVLDGLEFKVALGSTWKENLTELSGGQRSLVALSLILAMLLFKPAPIYILDEVDAALDLSHTQNIGQMLRTHFRHSQFIVVSLKDGMFNNANVLFKTKFVDGVSTVARFAQSQNGVNTTGHSRADKAK
L_chalumnae_ENSLACG00000016519_smc2	VVIGGRNKYLINGVNANNTRVQDLFCSVGLNVNNPHFLIMQGRITKVLNMKPPEILAMIEEAAGTRMYECKKIAAQKTIEKKEAKLKEIHTILEEEITPTLQKLKEERSSYLEYQKVMREIEHLSRLYVAYQFTCAEETKVRSAEDLKEMQDGVGKLQETMTENDKRVRELSKEIAELEKKRDKEVGGVLRTLEGALAEAQRADTKAQSTLDLKKQNIKGEEKKRVQLIKSMEEDSKALAAKEKEVKMITDGLSALQEDGQKDAEALAAAQQHFNAVSAGLSSNEDGEAATLAGQMMTCKNEISKAETEAKQAQMKLKHAQQEMKAKQAEVKKMDSGYKKDLEAFERVKKSKEKLEAEMKKLNYEDGKEEQLLEKRRELSRTVNRLRESYEALVSKFPN…
L_oculatus_ENSLOCG00000013338_smc2	MYIKSIILEGFKSYAQRTEINGFDPLFNAITGLNGSGKSNILDSICFLLGISNLTQVRASNLQDLVYKNGQAGITKASVSITFDNSDKKQSPLGFETHDEITVTRQVVIGGRNKYLINGVNANNNRVQDLFCSVGLNVNNPHFLIMQGRITKVLNMKPQEILAMIEEAAGTRMYEIKKMGAQKTIEKKEGKLKEIQTVLREEITPTLEKLKEERSSYFEYQKVLKEMEHLTRLYVAYQFVCAEETKAKSAAELKVLEDGTVKLREKMADNEKKVKELSQEIARLEDKRDQDVGGVLKSLQDALSEVQRVDAKTQSALDLKKQNLKGEEKRRKELVKSMEEDQKVLAAKESEARKITEKLRAIQEEGRKDAEALAAAQQHFNAVSAGLSGSEDGAAATLA…
M_leidyi_ML030218a	MKYCFGGVLICKTKEQAKKVAFDKSVKKKVITLEGDVYDPAGTLTGGSRNSSRCVLKELAACKQARSDLTSFKEQYRKLRLKKHERDLLEDRLKQTSHYKDIEELRKTKEDLAKQKEIVDNFNDKEKNLLKKCAEIEAKMKNFKAEQEKELKKAKKRLADAKSRLNECSKDAKTRENKLKELELEVSELAKELENLRSQLPKCDEAIAVAKSQVEGAQSKLDECREIKEKLSSELEGQRELIRQCSKEIENFVKEQKAAEKVISSSGIKLKELNHKLTKLNKEANDAKQQVEYYLNNYEWIASEKQYFGQKDTAYDFDKHDIKESDKKLERLKTNKDKLSKSVNMRAMHLLGEAEKRYLDLVKRKDIVTNDKQKINKVIKDLDEKKNRAVRKAWEQVNK…
M_musculus_ENSMUSG00000028312_Smc2	MYVKSIILEGFKSYAQRTEVNGFDPLFNAITGLNGSGKSNILDSICFLLGISNLSQVRASNLQDLVYKNGQAGITKASVSITFDNSDKKQSPLGFEAHDEITVTRQVVIGGRNKYLINGVNANNTRVQDLFCSVGLNVNNPHFLIMQGRITKVLNMKPPEILSMIEEAAGTRMYEYKKIAAQKTIEKKEAKLKEIKTILEEEITPTIQKLKEERSSYLEYQKVMREIEHLSRLYIAYQFLRAEDTKERSAGELKEMQDKIVNLQEVLSENEKKIKALNCEIEELERRKDKETGGKLKSLEDACAEAQRVNTKSQSAFDLKKKNLASEETKRKELQNSMAEDSKALAAKEKEVKKITDGLHGLQEASNKDAEALAAAQQHFNAVSAGLSSNEDGAEATLA…
M_virulenta_scaffold33g14t1	MYVKSVVLDGFKSYAQRTEVSGFDPLFNAITGLNGSGKSNILDSICFLLGISNLSQVRASNLQELIYKNGQAGVTKATVTITFDNSNKKQSPIGYDSFDEITISRQIILGGRNKYLINGCNATSTRVQDLFRSVQLNINNPHFLIMQILSMIEEAAGTRMYESKKQSAFRTMEKKDNKLQEMNSVLDEDITPTIAKLKEEKENYVKYQKVAREIEHYTKLCIAYEFLKAEDMKKKSGAELEAMQETVKKLQEKKVEFEEKIKTIDIELKELQKKKDEETGGAIKQLEGKVDELSKVDVKANSDLKHKKESRAKEEKKKNELVKNIKDDETQVKKKEKETQDSMSMIKELEEKSRKDAEAVTAAQDHFHAVSAGLSSNDDGEDKTLADQLMDCKNAISQA…
N_vectensis_NVEC200_003825_11	MYIKQIVIDGFKSYAQRTTVSGFDPLFNAITGLNGSGKSNILDSICFLLGISNLSQVRASSLQELVYKGGQAGVTKATVTITFDNSDKKQSPLGYETFDEITVSRQVVIGGRNKYLINGCNANNTRVQDLFRSVQLNINNPHFLIMQGRITKVLNMKPPEILSMIEEAAGTRMYESKKQSAQRTIEKKDSKLQEIETILAEEITPTLKKLKEERASYLEYQKVMRELEHFTRLFIAHQFVMAEEMQSKSASELDTMKEAINQLQCNIKEIEAKIKEVSKEISELEKKRNAEAGDAMKKLESSFDEVQKVDVKAKSDLKHEKEQLAAQKRQKKDLEKNRDDDQAQVKSKETELSKINDQLAKLEEKSNQDSEAVKTAQEHYHAVSAGLSSNDDGEDKTLA…
O_bimaculoides_Ocbimv22032126mg	MYIKSIVIDGFKSYAQRTEINGFDHLFNAITGLNGSGKSNILDSICFLLGISNLSQVRATNLQDLVYKSGQAGVTKATVSIVFDNLDKKHGPLGYEQYDEITVTRQVVIGGRNKYMINGMSAQHKRVQDLFQSVQLNVNNPHFLIMQGRITKVLNMKPPEILSMIEEAAGTRLYETKKESAQRTIEKKDAKLAEIENILREDINPTLTKLREERSSYLEFQKITRELEHLSKLYIAYQFMCAEDRKKKSADEVVEIAETIGKLAEKSKEVKESIQVANRQIQELESKKEKESGEALSKVQKNLSDANVVHAKILSALDSKKESMKAEEKKKKSLLKQKEDNTKTIATQEKDLEKILSATEKLQKQSVEDAEDFAAAQKHFHAVTAGLSSNADGEAATLN…
P_bachei_sb	MEASCKTAEKEISKEKKEMEMAGKAVSDFERKIEKMGFNPDTFAQLQDRKTEVENTIAASSRQVNDLVGKYPQLNFDYTSPTSNFDRRKVKGLLVDLFTVKDPDFALALEVAAGGKLYNVVTDNEDTASLLIKKGQLRKRYTMVPLNKIKGGMVDPGVVQAAQQLVGGSNCVPALQAISYSKELVGVLVSLRMGPDKCVLCLLSGSFPLGWPTSPGTSLLIYPLIPMPGTLTGGSRDTSRCVLRELIKGQAVREELKLIKNEHRQICSDITKMNAQHEQWKTMSGELRLKKHELELIENRLKQTSHYKDIEELERMRGELNSQNEVIAGFSEREKKLLEECRSVEKKMKNMKADQEKEVKKAEKRITEARGRLNTFLKKHKENSNRMKELELEVDSLQT…
P_bachei_sb	MGPDLCLLSGFPLYSSDFIFSSVQFSSVPPLSPSISPSLSPSLIASAFPGDDLVTFFLTPWDKEDYPAILLTPSPPTSESNVSPPPSLQIGGVERLPTGGLIVVTPEQGTDLFQRDYDGINWAGRPVQISP
P_lutea_plut2.m8.16766.m1	MYIKQVVIDGFKSYAQRTTVSGFDPQFNAITGLNGSGKSNILDSICFLLGISNLSQVRASSLQELVYKGGQAGVTKATVTITFDNSDKKQSPLGYETFDEITVSRQVVIGGRNKYLINGCNANNTRVQDLFRSVQLNVNNPHFLIMQGRITKVLNMKPPEILSMIEEAAGTRMYESKKQSAQRTIEKKDSKLQEIETILAEEITPTLTKLKEERASYLEYQKVMREVEHLSRLYIAHQFVMAEDVQKRSVTELEEIKESIRNLQENYKEIDEKVLELNVVITELETKRNAESGEVIAKLEKKFDEVSKIDVKANSDLKHVKDSLAAEKKKKKTLLKSFDDDQSQLKNKEKELKKLSDLLVKLEQTSQTDSNAVQAAQDHFHAVSAGLSSNEGGEDKTLA…
P_marinus_ENSPMAG00000001528	MYIKSIVVDGFKSYAQRTEISDWDPLFNAITGLNGSGKSNILDAVCFVLGISNLSRVRAASLQELVYKNGQAGVTKATVSITFDNRDRKQSPLGFEGHAEITVTRQVVIGGRNKYLINGVNATTARVQDLFRSVGLNVNNPHFLIMQGRITKVLNMKPPEILAMIEEAAGTRMYESKKLAAQKTIEKKEAKLKEINDVLDEEISPTLEKLKQERTSYLEYSKLCRELDSLRRLVIAHQFCTASQGQESAALHLQKLRADEQEAREEVERLEKEEKKREGELREMERERDKEAGGDLARVEEALTHAQRAHAKAQSTLDIRTEALATERAHRDQLLANMREDASARDAKRSQVVALEAALASASACSQEAARGLQEAQARFAAASVGLSEDGQGHAATLA…
P_miniata_PMI_001372	MTADEEEAHRERQEEDGHHPELDEKKNEALKKAWAQVNKDFGSILLTLLPGTQAKLQPVEGHSILDGLEVKVAFGDVWKESLAELSGGQRFPAPLYILDEVDAALDLSHTQNIGQMLRTHFRHSQFIVVSLKDGMFNNANVLFKTKFVDGVSCVTRYAQSPSSSSAAGRSGSSGSRAKGTAKKGSGAKKARIEPLMEQGQ
P_miniata_PMI_001371	MATIQELDEKKNEALKKAWAQVNKDFGSIFSTLLPGTQAKLQPVEGHSILDGLEVKVAFGDVWKESLAELSGGQRLLVTLYLTYATDKMFSRLETNFSCF
P_miniata_PMI_011774	MIEEAAGTRMYENKKASAQKTIEKKDAKLKEIDSIMSEEITPTLTRLKEERSNYLEYQKVMRELEHLSRLHIAYQFVGAEEMSKKSAEDLAKMADQMNQLRDRLKEIDNKIAELGQLIKDLEKQRDAEAGGRMKEIEKALAERQNVDTKMQSSVQHQREALAKEKKNKKAVLKSYDEDQATLKSKEKDIDKNSANFEKVASSYKAHTEAIAAAQKHLQAVSAGLSSSDDGEAKTLADQLMACKDEMNSAETGLKQAQSTLKTAQAELKKKQSELKKTEKEYQKDTANLEAVQKNKAKVEVMFPNLQFEYRDPEKNFDHSKVHGLVARLIQVKDVRNATALEVTAGRKLYNVVVDTEVTSKKLLQKGELKRRYTIIPLNKIAARSLAADKIKAAQNLDVE…
P_miniata_PMI_021686	MLRTHFRHSQFIVVSLKDGMFNNANVLFKTKFVDGVSCVTRYAQSPSSSAAAGRSGSSGSRAKGTAKKGSGAKKARIEPLMEQGQ
P_naikaiensis_g13581.t1	MYIKEITIDGFKSYAQRTTIGPFDAQFNAITGLNGSGKSNILDSICFVMGISNLSNVRATGLSDLVYKNGRAGVTRATVSITFDNRNKSQSPIGYENEQEIVVSRQIVVDGKNKYTINGLNATNQKVVDFFRSVQLNVNNPHFLIMQGRITKVLNMKPPEILSMIEEAAGTRMYESKREVAQKTIEKKEEKLKQITDVLQEEILPKLIGLKKERDSYMQYQEMLREIEHLSKLEVAYQYHQAQQKVVSNSDEVEKQKKEMEKLQDEIAQSSERIQRLTDEAKELESQQAAQRNSDLKELEREWNTARNNEAEAVSAFEHCDKREKDVKKKISQIEKAIKSERESVEKNKDNLKKLLETFENFKKCKNEAEKEVEQAEDLIQAVQSGMYATESGVAVSLH…
R_esculentum_mRNA.RE13544	REGS684.66	MYIKNIILDGFKSYAQRTEVSGFDCNFNAITGLNGSGKSNILDSICFLLGISNLSQVRAGSLQELIYKNGQAGVTRATVTITFDNTDKNQTPIGYESFDEITISRQIVLGGRNKYLINGCNANNTRVQDLFRSVQLNINNPHFLIMQGRITKVLNMKPVEILSMIEEAAGTKMYESKKQSALRTIEKKESKLTEIEKILNEEITPTISRLKEERSSYMEYQKVIREIDHLKKLCIAYEFLKAEELKKSSGSGLDEMMENKQKLEERLKELEEITNKINIEIQELQSRKDAQSGGVMKELEAKVNEISKADVQVNSDLKYAREALKGEQKKKKEIEKNIADDEAQLKAKEKEISKRGDALKKLEDRSKEDEEAIAAAQKHFHAVSAGLSSNTDGEDKTLA…
S_callimorphus_NY_Scal100_v1504061	MYIKQVVIDGFKSYAQRTTVSGFDPLFNAITGLNGSGKSNILDSICFLLGISNLSQVRASSLQELVYKGGQAGVTKATVTITFDNTDKKQSPLGYETFDEITVSRQVVIGGRNKYLINGCNANNTRVQDLFRSVQLNINNPHFLIMQGRITKVLNMKPPEILSMIEEAAGTRMYESKKQSAQRTIEKKDSKLQEIESILAEEITPTLKKLKEERASYLEYQKVMRELEHFTRLYVAHQFVMAEEMQTKSAEELDVMRESIAKLQEKAKEVEGKIKDVNSEIAELEKKRNAEAGEAMKKLEAKFDEVSKVDVKANSDLKHAKELLTAEKRKKKNLEKSQNDDQAQVKAKEKELSKLAELLGKLEEKSKRDTEAVKLAQDHFHAVSAGLSSNDDGEEKTLA…
S_callimorphus_NY_Scal100_v1504071	MSDHSGALQDFGSIFSTLLPGATAKLAPPEGQTELDGLEVKVGFGTVWKESLSELSGGQRSLVALSLILSLLLFKPAPLYILDEVDAALDLSHTQNIGQMLRTHFKHSQFIVVSLKDGMFNNANVLFKTKFVDGVSTVTRYVQNQPTRDPDTTAHGKNTAKRGQDRSKRPRIEATPQPLTTTQR
S_mediterranea_SMU15002242	MFIKSIVIDGFKSYAKRTEITGFDPAFNAITGLNGSGKSNILDAICFLLGITNLSQVRASNLQELVYKCGQAGINKATVCIIFDNSEKSSSPIGYEQFDEITITRQIVVGGKNKYLINGIMAPNNRVQDLFRSVQLNVNNPHFLIMQGRITKVLNMKPREILSLLEEAANTKHYESKRDDTLKTIEKKDSKLKEIDKILTEEIKPKLEKLKLERSSYLEYQKIVRDLEYLNKFLVAYEYTTTKAIVDNADGEYNRLKNQLNQEEETIKKNEQQKLNFENNIEKLCEERDKVHVEKLQNMKTEFAEMQKQEAVLKNAIKRAEDEVKEAKENVKKLQKQMKEDAESQKQTKLAIAKIQGQFDKLKEKLEKSKQNYQSADQRLLNVNSGFFQSKTNATGSLA…
S_purpuratus_LOC574836	MYIKEIIVDGFKSYAQRTEIKGFDPLFNAITGLNGSGKSNILDSICFLLGISNLSQVRAGSLQELVYKGGQAGVTKATVTIVFDNKDKKQSPVGYDSFDEFTVSRQVVIGGRNKYLINGSNANNSRVQDLFCSVQLNVNNPHFLIMQGRITKVLNMKPPEILSMIEEAAGTRMYENKKASAQKTIEKKDAKLKEIESVLNEEITPTLTRLNEERSSYLEYQKVLRELDHLTKLHVAYQFVSAEKLSKESEQELGKIAEATTAMRQRMKEIDDKLLELTNTIQALEKERDEEAGGVLKEIEKRLVEAQNSDTKIQSSLQHKKEAVTNEKKNKKAVEKSYTEDQATLKAKEKEIEKLTGSFTKLEEKCKENQEGVAQAQKHLQAVSAGLSSNEDGEDKTLA…
S_purpuratus_LOC585999	MYIKEIIVDGFKSYAQRTEIKGFDPLFNAITGLNGSGKSNILDSICFLLGISNLSQVRAGSLQELVYKGGQAGVTKATVTIVFDNKDKKQSPVGYDSFDEFTVSRQVVIGGRNKYLINGSNANNSRVQDLFCSVQLNVNNPHFLIMQGRITKVLNMKPPEILSMIEEAAGTRMYENKKASAQKTIEKKDAKLKEIESVLNEEITPTLTRLNEERSSYLEYQKVLRELDHLTKLHVAYQFVSAEKLSKESEQELGKIAEATTAMRQRMKEIDDKLLELTNTIQALEKERDEEAGGVLKEIEKRLVEAQNSDTKIQSSLQHKKEAVTNEKKNKKAVEKSYTEDQATLKAKEKEIEKLTGSFTKLEEKCKENQEGVAQAQKHLQAVSAGLSSNEDGEDKTLA…
X_tropicalis_ENSXETG00000010209_smc2	MHVKSIIIDGFKSYAQRTEINGFDPLFNAITGLNGSGKSNILDSICFLLGISNLTQVRASNLQDLVYKNGQAGITKATVSITFDNYDKKQSPLGFEAHDEITVTRQVVIGGRNKYLINGVNANNTRVQDLFCSVGLNVNNPHFLIMQGRITKVLNMKPPEILAMIEEAAGTRMYECKKIAAQKTIEKKEAKLKEIQTILEEEITPTIHKLKEERSSYLEYQKIMREIEHLSRLYIAYQFVCAEETKVRSAEELKEMQDSILKLQDTMAENERKVKELGKEIGELEKLRDQEVGGALRSLEEALAEAQRSDTKVQSALDLKKQNMKAEEKKRKELVKSMEEDAKALTAKEKEVKKITDSLSSLQETSQKDAEALTGAQQHFNAVSAGLSSNEDGEEATLA…
M_brevicollis_MONBRDRAFT_18617	MQEIIIDGFKSYAHRTVVPDFDPLFNAITGLNGSGKSNILDAICFVLGISNLSQVRAGNLQDLVYKQGQAGVNRASVTIVFDNSDKAQSPVGYEAHDEITICRQIIIGGRNKYFINGHNAQPQRVQNLFHSVQLNVNNPHFLIMQGRITKVLNMKPPEILSMIEEAAGTRMYETKKQAAYKTMAKKDKKFEHINQLLDEEITPTLDKLRQDRSAYLEYTKTRTEVEHLSRFVVACDYQAAEQRLQSSSQQLEELDARIKALEKRRKEMERDNEKQNLELKQRQRASEQHDDLLQRLEAEVADLSKKLVKAKAELDTHLQGQEEERRALADIHKAIDEAQAALASKRSENASAGSSYEDMKATFEQADERVRVAQRGVEAVKMGMTMVNGESKSFAEEMR…

## Sheet: Legend
Supplemental Data S6. Excel spreadsheet containing the amino acid sequences of all proteins assigned by the Orthofinder2 pipeline to the orthogroups associated with the five ancestral Condensin II subunits in metazoans (SMC2, SMC4, CAP-D3, CAP-H2, and CAP-G2). These sequences served as the basis for the gene trees presented in Figure S6.
