# Supplementary material for: A chromosome-scale epigenetic map of the Hydra genome reveals conserved regulators of cell state
Source: HighWire-hosted journal article supplement (doi:10.1101/gr.277040.122), 2023-01-13
Supplement: Supplemental_Data_S8.xlsx [file Supplemental_Data_S8.xlsx]

## Sheet: sDoc1_scMarkers
Average log2 Fold-Change	% of Target Cells w/ Expression	% of Control Cells w/ Expression	Adjusted P-Value	Target Cluster	Gene ID
6.70652	0.996	0.042	0	Ec_BasalDisk	HVAEP1-G020671
6.0951	0.992	0.019	0	Ec_BasalDisk	HVAEP1-G010204
5.93281	0.994	0.034	0	Ec_BasalDisk	HVAEP1-G021955
5.75344	1	0.017	0	Ec_BasalDisk	HVAEP1-G028410
5.63714	0.975	0.015	0	Ec_BasalDisk	HVAEP1-G002299
5.42026	0.989	0.05	0	Ec_BasalDisk	HVAEP1-G002428
5.38207	0.962	0.012	0	Ec_BasalDisk	HVAEP1-G001138
5.16728	0.987	0.01	0	Ec_BasalDisk	HVAEP1-G020675
5.05302	0.945	0.01	0	Ec_BasalDisk	HVAEP1-G021807
4.73646	0.943	0.006	0	Ec_BasalDisk	HVAEP1-G020720
4.72423	0.97	0.006	0	Ec_BasalDisk	HVAEP1-G014104
4.65644	0.983	0.037	0	Ec_BasalDisk	HVAEP1-G006596
4.56308	0.937	0.007	0	Ec_BasalDisk	HVAEP1-G001119
4.52049	1	0.327	0	Ec_BasalDisk	HVAEP1-G002424
4.49901	0.966	0.184	0	Ec_BasalDisk	HVAEP1-G001209
4.49021	0.92	0.165	0	Ec_BasalDisk	HVAEP1-G009194
4.43784	0.93	0.023	0	Ec_BasalDisk	HVAEP1-G005583
4.40483	0.829	0.022	0	Ec_BasalDisk	HVAEP1-G002304
4.30851	0.989	0.191	0	Ec_BasalDisk	HVAEP1-G019714
4.29103	0.958	0.021	0	Ec_BasalDisk	HVAEP1-G006789
4.17171	0.981	0.032	0	Ec_BasalDisk	HVAEP1-G006609
3.94347	0.84	0.033	0	Ec_BasalDisk	HVAEP1-G002182
3.835	0.892	0.022	0	Ec_BasalDisk	HVAEP1-G013209
3.807	0.949	0.072	0	Ec_BasalDisk	HVAEP1-G002303
3.55615	0.736	0.003	0	Ec_BasalDisk	HVAEP1-G020722
3.4137	0.637	0.007	0	Ec_BasalDisk	HVAEP1-G002276
3.28493	0.981	0.207	0	Ec_BasalDisk	HVAEP1-G002427
3.28082	0.973	0.005	0	Ec_BasalDisk	HVAEP1-G014494
3.22851	0.977	0.245	0	Ec_BasalDisk	HVAEP1-G025159
3.22635	0.386	0.012	0	Ec_BasalDisk	HVAEP1-G005165
3.11583	0.833	0.223	0	Ec_BasalDisk	HVAEP1-G002307
3.01943	0.897	0.033	0	Ec_BasalDisk	HVAEP1-G021812
2.92615	0.941	0.018	0	Ec_BasalDisk	HVAEP1-G000598
2.90638	0.937	0.22	0	Ec_BasalDisk	HVAEP1-G015718
2.87287	0.81	0.004	0	Ec_BasalDisk	HVAEP1-G004171
2.84162	0.884	0.078	0	Ec_BasalDisk	HVAEP1-G005582
2.82691	0.848	0.055	0	Ec_BasalDisk	HVAEP1-G013925
2.80198	0.901	0.003	0	Ec_BasalDisk	HVAEP1-G001545
2.73971	0.975	0.353	0	Ec_BasalDisk	HVAEP1-G014848
2.70436	0.867	0.004	0	Ec_BasalDisk	HVAEP1-G001226
2.69691	0.681	0.004	0	Ec_BasalDisk	HVAEP1-G014492
2.67336	0.882	0.004	0	Ec_BasalDisk	HVAEP1-G015970
2.64081	0.829	0.003	0	Ec_BasalDisk	HVAEP1-G006773
2.62491	0.93	0.157	0	Ec_BasalDisk	HVAEP1-G027100
2.61734	0.907	0.007	0	Ec_BasalDisk	HVAEP1-G017592
2.57035	0.637	0.001	0	Ec_BasalDisk	HVAEP1-G001222
2.55222	0.882	0.006	0	Ec_BasalDisk	HVAEP1-G018568
2.53092	0.819	0.005	0	Ec_BasalDisk	HVAEP1-G013335
2.53041	0.249	0.003	0	Ec_BasalDisk	HVAEP1-G009487
2.51158	0.747	0.124	0	Ec_BasalDisk	HVAEP1-G024237
2.49071	0.903	0.007	0	Ec_BasalDisk	HVAEP1-G004122
2.48904	0.88	0.004	0	Ec_BasalDisk	HVAEP1-G015619
2.39692	0.89	0.01	0	Ec_BasalDisk	HVAEP1-G010024
2.3525	0.854	0.112	0	Ec_BasalDisk	HVAEP1-G016825
2.34894	0.85	0.064	0	Ec_BasalDisk	HVAEP1-G022133
2.30614	0.724	0.003	0	Ec_BasalDisk	HVAEP1-G007224
2.30375	0.869	0.018	0	Ec_BasalDisk	HVAEP1-G003185
2.29316	0.985	0.255	0	Ec_BasalDisk	HVAEP1-G012478
2.28423	0.869	0.002	0	Ec_BasalDisk	HVAEP1-G003512
2.22125	0.821	0.015	0	Ec_BasalDisk	HVAEP1-G012025
2.20779	0.92	0.227	0	Ec_BasalDisk	HVAEP1-G025904
2.19959	0.84	0.002	0	Ec_BasalDisk	HVAEP1-G002175
2.13879	0.884	0.027	0	Ec_BasalDisk	HVAEP1-G024863
2.13603	0.648	0.099	0	Ec_BasalDisk	HVAEP1-G028420
2.1256	0.859	0.09	0	Ec_BasalDisk	HVAEP1-G006440
2.1175	0.829	0.003	0	Ec_BasalDisk	HVAEP1-G016116
2.07618	0.774	0.002	0	Ec_BasalDisk	HVAEP1-G016363
2.05539	0.751	0.104	0	Ec_BasalDisk	HVAEP1-G007012
2.0446	0.8	0.014	0	Ec_BasalDisk	HVAEP1-G014500
2.01183	0.572	0.006	0	Ec_BasalDisk	HVAEP1-G010772
1.98022	0.806	0.001	0	Ec_BasalDisk	HVAEP1-G002143
1.97983	0.778	0.003	0	Ec_BasalDisk	HVAEP1-G007688
1.96601	0.819	0.103	0	Ec_BasalDisk	HVAEP1-G016823
1.94047	0.852	0.043	0	Ec_BasalDisk	HVAEP1-G013086
1.92863	0.728	0.023	0	Ec_BasalDisk	HVAEP1-G009158
1.92427	0.797	0.006	0	Ec_BasalDisk	HVAEP1-G011178
1.90576	0.768	0.043	0	Ec_BasalDisk	HVAEP1-G025908
1.89684	0.835	0.005	0	Ec_BasalDisk	HVAEP1-G012845
1.8964	0.759	0.07	0	Ec_BasalDisk	HVAEP1-G011734
1.89278	0.903	0.154	0	Ec_BasalDisk	HVAEP1-G026267
1.89197	0.795	0.005	0	Ec_BasalDisk	HVAEP1-G016333
1.88964	0.764	0.027	0	Ec_BasalDisk	HVAEP1-G021851
1.87551	0.757	0.017	0	Ec_BasalDisk	HVAEP1-G006514
1.86382	0.871	0.15	0	Ec_BasalDisk	HVAEP1-G028686
1.86214	0.819	0.035	0	Ec_BasalDisk	HVAEP1-G020964
1.85739	0.749	0.022	0	Ec_BasalDisk	HVAEP1-G016019
1.85687	0.768	0.019	0	Ec_BasalDisk	HVAEP1-G004092
1.83042	0.907	0.22	0	Ec_BasalDisk	HVAEP1-G009216
1.79249	0.823	0.093	0	Ec_BasalDisk	HVAEP1-G003425
1.78854	0.857	0.111	0	Ec_BasalDisk	HVAEP1-G020630
1.76742	0.751	0.022	0	Ec_BasalDisk	HVAEP1-G005702
1.7214	0.77	0.058	0	Ec_BasalDisk	HVAEP1-G021174
1.72067	0.81	0.074	0	Ec_BasalDisk	HVAEP1-G000784
1.69406	0.783	0.018	0	Ec_BasalDisk	HVAEP1-G001234
1.69186	0.705	0.004	0	Ec_BasalDisk	HVAEP1-G025678
1.66833	0.778	0.054	0	Ec_BasalDisk	HVAEP1-G011268
1.63986	0.715	0.001	0	Ec_BasalDisk	HVAEP1-G014493
1.62488	0.745	0.082	0	Ec_BasalDisk	HVAEP1-G012086
1.61653	0.734	0.004	0	Ec_BasalDisk	HVAEP1-G016651
1.61085	0.787	0.039	0	Ec_BasalDisk	HVAEP1-G016381
1.60773	0.745	0.054	0	Ec_BasalDisk	HVAEP1-G017164
1.60498	0.753	0.042	0	Ec_BasalDisk	HVAEP1-G017483
1.59996	0.698	0.002	0	Ec_BasalDisk	HVAEP1-G013049
1.59374	0.766	0.05	0	Ec_BasalDisk	HVAEP1-G004837
1.56251	0.675	0.002	0	Ec_BasalDisk	HVAEP1-G022951
1.55994	0.766	0.12	0	Ec_BasalDisk	HVAEP1-G013594
1.53997	0.762	0.123	0	Ec_BasalDisk	HVAEP1-G002014
1.52413	0.546	0.034	0	Ec_BasalDisk	HVAEP1-G008602
1.47196	0.686	0.029	0	Ec_BasalDisk	HVAEP1-G026269
1.4653	0.736	0.061	0	Ec_BasalDisk	HVAEP1-G000783
1.46321	0.776	0.097	0	Ec_BasalDisk	HVAEP1-G025493
1.45912	0.732	0.149	0	Ec_BasalDisk	HVAEP1-G023535
1.45799	0.728	0.082	0	Ec_BasalDisk	HVAEP1-G018344
1.44492	0.627	0.002	0	Ec_BasalDisk	HVAEP1-G028145
1.44278	0.797	0.134	0	Ec_BasalDisk	HVAEP1-G025286
1.44231	0.886	0.189	0	Ec_BasalDisk	HVAEP1-G020288
1.43732	0.726	0.08	0	Ec_BasalDisk	HVAEP1-G024408
1.43153	0.747	0.139	0	Ec_BasalDisk	HVAEP1-G026864
1.43029	0.774	0.146	0	Ec_BasalDisk	HVAEP1-G001540
1.40777	0.65	0.002	0	Ec_BasalDisk	HVAEP1-G012976
1.39994	0.707	0.03	0	Ec_BasalDisk	HVAEP1-G011620
1.38778	0.707	0.116	0	Ec_BasalDisk	HVAEP1-G003899
1.36559	0.643	0.05	0	Ec_BasalDisk	HVAEP1-G001722
1.34174	0.504	0.05	0	Ec_BasalDisk	HVAEP1-G006694
1.34141	0.711	0.05	0	Ec_BasalDisk	HVAEP1-G003376
1.32392	0.627	0.015	0	Ec_BasalDisk	HVAEP1-G004025
1.32136	0.804	0.146	0	Ec_BasalDisk	HVAEP1-G009910
1.31448	0.624	0.002	0	Ec_BasalDisk	HVAEP1-G014954
1.30512	0.62	0.065	0	Ec_BasalDisk	HVAEP1-G024024
1.30229	0.703	0.036	0	Ec_BasalDisk	HVAEP1-G001377
1.29932	0.762	0.146	0	Ec_BasalDisk	HVAEP1-G012298
1.29562	0.7	0.125	0	Ec_BasalDisk	HVAEP1-G010057
1.29314	0.762	0.142	0	Ec_BasalDisk	HVAEP1-G028010
1.27099	0.643	0.001	0	Ec_BasalDisk	HVAEP1-G003196
1.26491	0.624	0.002	0	Ec_BasalDisk	HVAEP1-G000459
1.26024	0.658	0.062	0	Ec_BasalDisk	HVAEP1-G011361
1.24277	0.586	0.044	0	Ec_BasalDisk	HVAEP1-G023208
1.2401	0.679	0.096	0	Ec_BasalDisk	HVAEP1-G028255
1.23586	0.692	0.076	0	Ec_BasalDisk	HVAEP1-G018651
1.22593	0.749	0.098	0	Ec_BasalDisk	HVAEP1-G007987
1.22125	0.601	0.001	0	Ec_BasalDisk	HVAEP1-G017494
1.18069	0.673	0.087	0	Ec_BasalDisk	HVAEP1-G013477
1.1738	0.584	0.013	0	Ec_BasalDisk	HVAEP1-G019896
1.16358	0.462	0.001	0	Ec_BasalDisk	HVAEP1-G010830
1.14122	0.624	0.04	0	Ec_BasalDisk	HVAEP1-G000555
1.14047	0.686	0.101	0	Ec_BasalDisk	HVAEP1-G019867
1.12975	0.57	0.01	0	Ec_BasalDisk	HVAEP1-G020221
1.12815	0.624	0.035	0	Ec_BasalDisk	HVAEP1-G001385
1.12342	0.608	0.06	0	Ec_BasalDisk	HVAEP1-G011925
1.12279	0.519	0.054	0	Ec_BasalDisk	HVAEP1-G022167
1.11269	0.616	0.02	0	Ec_BasalDisk	HVAEP1-G014497
1.10938	0.551	0.003	0	Ec_BasalDisk	HVAEP1-G011757
1.10542	0.603	0.02	0	Ec_BasalDisk	HVAEP1-G020526
1.09853	0.538	0.069	0	Ec_BasalDisk	HVAEP1-G015726
1.09701	0.635	0.1	0	Ec_BasalDisk	HVAEP1-G005965
1.08527	0.646	0.068	0	Ec_BasalDisk	HVAEP1-G017724
1.08231	0.53	0.016	0	Ec_BasalDisk	HVAEP1-G012958
1.07908	0.629	0.058	0	Ec_BasalDisk	HVAEP1-G011362
1.05037	0.542	0.022	0	Ec_BasalDisk	HVAEP1-G011753
1.04757	0.506	0.001	0	Ec_BasalDisk	HVAEP1-G018101
1.03504	0.437	0.002	0	Ec_BasalDisk	HVAEP1-G013826
1.03279	0.428	0.017	0	Ec_BasalDisk	HVAEP1-G008157
1.02597	0.603	0.077	0	Ec_BasalDisk	HVAEP1-G010862
1.02346	0.532	0.015	0	Ec_BasalDisk	HVAEP1-G007146
1.02065	0.559	0.001	0	Ec_BasalDisk	HVAEP1-G021593
1.0116	0.576	0.076	0	Ec_BasalDisk	HVAEP1-G005448
1.00027	0.426	0.039	0	Ec_BasalDisk	HVAEP1-G027550
1.94168	0.882	0.258	1.36111e-298	Ec_BasalDisk	HVAEP1-G021844
1.68516	0.797	0.197	6.64086e-297	Ec_BasalDisk	HVAEP1-G013816
1.05224	0.622	0.105	1.15306e-295	Ec_BasalDisk	HVAEP1-G013247
1.48635	0.641	0.119	2.19617e-289	Ec_BasalDisk	HVAEP1-G011405
2.15432	0.987	0.404	1.57725e-279	Ec_BasalDisk	HVAEP1-G003348
1.24519	0.686	0.137	4.69624e-279	Ec_BasalDisk	HVAEP1-G006453
1.54982	0.791	0.211	4.8541e-269	Ec_BasalDisk	HVAEP1-G020113
1.15111	0.705	0.15	2.34054e-268	Ec_BasalDisk	HVAEP1-G026863
1.77913	0.878	0.271	3.27787e-268	Ec_BasalDisk	HVAEP1-G001083
1.56445	0.869	0.246	5.4698e-267	Ec_BasalDisk	HVAEP1-G011453
1.00993	0.646	0.117	1.54456e-262	Ec_BasalDisk	HVAEP1-G022978
1.58569	0.462	0.061	1.08342e-260	Ec_BasalDisk	HVAEP1-G017201
1.04225	0.576	0.101	9.86127e-255	Ec_BasalDisk	HVAEP1-G023939
1.12055	0.65	0.127	1.03946e-253	Ec_BasalDisk	HVAEP1-G017502
1.93446	0.998	0.784	2.80918e-244	Ec_BasalDisk	HVAEP1-G026401
2.07715	0.591	0.109	2.50057e-243	Ec_BasalDisk	HVAEP1-G016410
1.03644	0.662	0.13	6.20816e-241	Ec_BasalDisk	HVAEP1-G026947
1.89118	0.884	0.345	5.59583e-235	Ec_BasalDisk	HVAEP1-G012888
1.98928	0.911	0.299	1.8652e-229	Ec_BasalDisk	HVAEP1-G010277
1.39099	0.31	0.032	2.87571e-226	Ec_BasalDisk	HVAEP1-G001807
1.24718	0.747	0.205	4.19578e-226	Ec_BasalDisk	HVAEP1-G005915
1.45805	0.707	0.18	2.59672e-219	Ec_BasalDisk	HVAEP1-G023047
1.14064	0.804	0.229	2.88918e-215	Ec_BasalDisk	HVAEP1-G022935
1.02874	0.711	0.187	6.40057e-215	Ec_BasalDisk	HVAEP1-G007363
1.35682	0.816	0.277	2.46053e-212	Ec_BasalDisk	HVAEP1-G002394
1.06424	0.544	0.098	3.33204e-211	Ec_BasalDisk	HVAEP1-G017199
1.73747	0.886	0.363	2.03238e-204	Ec_BasalDisk	HVAEP1-G021648
1.2265	0.749	0.225	1.44763e-198	Ec_BasalDisk	HVAEP1-G026757
1.10451	0.724	0.186	5.95639e-187	Ec_BasalDisk	HVAEP1-G027103
1.83558	0.909	0.476	6.05508e-186	Ec_BasalDisk	HVAEP1-G004718
1.496	0.842	0.328	5.56077e-182	Ec_BasalDisk	HVAEP1-G014609
1.73701	0.989	0.666	6.25258e-182	Ec_BasalDisk	HVAEP1-G001603
1.44168	0.926	0.495	8.08697e-179	Ec_BasalDisk	HVAEP1-G003923
1.48805	0.787	0.259	1.31728e-177	Ec_BasalDisk	HVAEP1-G008329
1.28076	0.705	0.203	2.20671e-177	Ec_BasalDisk	HVAEP1-G020899
1.12214	0.705	0.217	3.45216e-172	Ec_BasalDisk	HVAEP1-G017809
1.42863	0.956	0.477	1.55992e-171	Ec_BasalDisk	HVAEP1-G007807
1.31755	0.764	0.276	6.53828e-171	Ec_BasalDisk	HVAEP1-G020084
1.40481	0.989	0.515	2.22796e-165	Ec_BasalDisk	HVAEP1-G009346
1.17125	0.77	0.279	1.26094e-162	Ec_BasalDisk	HVAEP1-G022578
1.42508	0.996	0.725	1.57451e-153	Ec_BasalDisk	HVAEP1-G023161
1.29855	0.977	0.681	5.22563e-149	Ec_BasalDisk	HVAEP1-G018663
1.05699	0.658	0.207	5.43895e-147	Ec_BasalDisk	HVAEP1-G026268
1.09079	0.711	0.238	2.52984e-145	Ec_BasalDisk	HVAEP1-G004371
1.34997	0.808	0.29	2.02803e-144	Ec_BasalDisk	HVAEP1-G014114
1.17676	0.77	0.319	2.05e-141	Ec_BasalDisk	HVAEP1-G004393
1.3343	0.795	0.368	1.84628e-138	Ec_BasalDisk	HVAEP1-G005214
1.16434	0.654	0.194	2.63523e-138	Ec_BasalDisk	HVAEP1-G005406
1.10482	0.781	0.299	3.37582e-138	Ec_BasalDisk	HVAEP1-G007689
1.20732	0.975	0.78	1.17303e-127	Ec_BasalDisk	HVAEP1-G016320
1.19157	0.838	0.411	4.51449e-125	Ec_BasalDisk	HVAEP1-G022943
1.18345	0.956	0.566	1.57191e-121	Ec_BasalDisk	HVAEP1-G010998
1.05809	0.679	0.277	1.99405e-118	Ec_BasalDisk	HVAEP1-G016614
1.04777	0.93	0.609	2.99665e-112	Ec_BasalDisk	HVAEP1-G003606
1.48992	0.871	0.556	9.34109e-110	Ec_BasalDisk	HVAEP1-G024971
1.0456	0.648	0.236	8.40884e-106	Ec_BasalDisk	HVAEP1-G023551
1.01461	0.922	0.56	1.39791e-100	Ec_BasalDisk	HVAEP1-G008331
1.05271	0.84	0.493	8.11143e-94	Ec_BasalDisk	HVAEP1-G008896
1.08593	0.766	0.453	2.66141e-79	Ec_BasalDisk	HVAEP1-G005912
1.24041	0.297	0.16	2.6872e-15	Ec_BasalDisk	HVAEP1-G016849
3.99008	0.993	0.246	0	Ec_BodyCol/SC	HVAEP1-G020105
3.97151	0.994	0.263	0	Ec_BodyCol/SC	HVAEP1-G014589
3.93887	0.896	0.12	0	Ec_BodyCol/SC	HVAEP1-G028428
3.87447	0.985	0.2	0	Ec_BodyCol/SC	HVAEP1-G023179
3.30974	0.974	0.214	0	Ec_BodyCol/SC	HVAEP1-G020103
3.12507	0.977	0.132	0	Ec_BodyCol/SC	HVAEP1-G017195
3.06528	0.953	0.169	0	Ec_BodyCol/SC	HVAEP1-G009216
3.02566	0.929	0.138	0	Ec_BodyCol/SC	HVAEP1-G014587
3.00696	0.991	0.239	0	Ec_BodyCol/SC	HVAEP1-G014114
2.88908	0.924	0.159	0	Ec_BodyCol/SC	HVAEP1-G002427
2.85786	0.617	0.073	0	Ec_BodyCol/SC	HVAEP1-G016410
2.75183	0.96	0.102	0	Ec_BodyCol/SC	HVAEP1-G027100
2.74387	0.96	0.12	0	Ec_BodyCol/SC	HVAEP1-G012473
2.63086	0.962	0.134	0	Ec_BodyCol/SC	HVAEP1-G026215
2.55077	0.704	0.07	0	Ec_BodyCol/SC	HVAEP1-G025178
2.50268	0.946	0.133	0	Ec_BodyCol/SC	HVAEP1-G026265
2.50246	0.957	0.193	0	Ec_BodyCol/SC	HVAEP1-G012624
2.4834	0.987	0.194	0	Ec_BodyCol/SC	HVAEP1-G025159
2.44721	0.955	0.106	0	Ec_BodyCol/SC	HVAEP1-G025166
2.42069	1	0.819	0	Ec_BodyCol/SC	HVAEP1-G002398
2.34842	0.956	0.094	0	Ec_BodyCol/SC	HVAEP1-G012596
2.34738	0.983	0.206	0	Ec_BodyCol/SC	HVAEP1-G012478
2.32329	0.958	0.116	0	Ec_BodyCol/SC	HVAEP1-G015831
2.22197	0.935	0.085	0	Ec_BodyCol/SC	HVAEP1-G011162
2.20755	0.94	0.107	0	Ec_BodyCol/SC	HVAEP1-G016552
2.18526	0.973	0.252	0	Ec_BodyCol/SC	HVAEP1-G010277
2.14117	0.943	0.151	0	Ec_BodyCol/SC	HVAEP1-G012630
2.10247	0.953	0.135	0	Ec_BodyCol/SC	HVAEP1-G020288
2.10065	0.939	0.089	0	Ec_BodyCol/SC	HVAEP1-G009910
2.08124	0.968	0.207	0	Ec_BodyCol/SC	HVAEP1-G014774
2.01921	0.881	0.093	0	Ec_BodyCol/SC	HVAEP1-G017197
2.01717	0.788	0.056	0	Ec_BodyCol/SC	HVAEP1-G004046
2.01679	0.901	0.142	0	Ec_BodyCol/SC	HVAEP1-G005406
2.01558	0.913	0.077	0	Ec_BodyCol/SC	HVAEP1-G013426
2.01488	0.957	0.145	0	Ec_BodyCol/SC	HVAEP1-G011465
2.01417	0.728	0.162	0	Ec_BodyCol/SC	HVAEP1-G020625
2.01241	0.966	0.139	0	Ec_BodyCol/SC	HVAEP1-G005472
1.97801	0.928	0.209	0	Ec_BodyCol/SC	HVAEP1-G018274
1.95473	0.927	0.09	0	Ec_BodyCol/SC	HVAEP1-G017933
1.90307	0.936	0.132	0	Ec_BodyCol/SC	HVAEP1-G007989
1.88006	0.931	0.14	0	Ec_BodyCol/SC	HVAEP1-G007810
1.8729	0.212	0.031	0	Ec_BodyCol/SC	HVAEP1-G017316
1.8548	0.891	0.071	0	Ec_BodyCol/SC	HVAEP1-G020931
1.84109	0.894	0.088	0	Ec_BodyCol/SC	HVAEP1-G012083
1.83902	1	0.969	0	Ec_BodyCol/SC	HVAEP1-G002399
1.81831	0.738	0.06	0	Ec_BodyCol/SC	HVAEP1-G025454
1.80011	0.867	0.069	0	Ec_BodyCol/SC	HVAEP1-G028442
1.78224	0.886	0.087	0	Ec_BodyCol/SC	HVAEP1-G013830
1.7703	0.899	0.118	0	Ec_BodyCol/SC	HVAEP1-G026262
1.76776	1	0.938	0	Ec_BodyCol/SC	HVAEP1-G004300
1.74062	0.862	0.062	0	Ec_BodyCol/SC	HVAEP1-G023699
1.71206	0.946	0.449	0	Ec_BodyCol/SC	HVAEP1-G015834
1.69011	0.874	0.137	0	Ec_BodyCol/SC	HVAEP1-G027103
1.6869	0.878	0.072	0	Ec_BodyCol/SC	HVAEP1-G005390
1.67849	0.887	0.08	0	Ec_BodyCol/SC	HVAEP1-G011184
1.65628	0.848	0.217	0	Ec_BodyCol/SC	HVAEP1-G008329
1.63685	0.997	0.652	0	Ec_BodyCol/SC	HVAEP1-G023337
1.62062	0.827	0.058	0	Ec_BodyCol/SC	HVAEP1-G019520
1.58279	0.834	0.09	0	Ec_BodyCol/SC	HVAEP1-G001283
1.5553	0.78	0.052	0	Ec_BodyCol/SC	HVAEP1-G017251
1.5414	0.781	0.072	0	Ec_BodyCol/SC	HVAEP1-G006821
1.53149	0.665	0.057	0	Ec_BodyCol/SC	HVAEP1-G011047
1.51767	0.977	0.442	0	Ec_BodyCol/SC	HVAEP1-G007807
1.50795	0.997	0.755	0	Ec_BodyCol/SC	HVAEP1-G007419
1.50406	0.914	0.28	0	Ec_BodyCol/SC	HVAEP1-G028649
1.50075	0.759	0.066	0	Ec_BodyCol/SC	HVAEP1-G017200
1.47584	0.815	0.106	0	Ec_BodyCol/SC	HVAEP1-G028686
1.46775	0.821	0.094	0	Ec_BodyCol/SC	HVAEP1-G028010
1.46142	0.448	0.032	0	Ec_BodyCol/SC	HVAEP1-G011647
1.45987	0.445	0.035	0	Ec_BodyCol/SC	HVAEP1-G017201
1.43866	0.809	0.062	0	Ec_BodyCol/SC	HVAEP1-G026085
1.436	0.792	0.093	0	Ec_BodyCol/SC	HVAEP1-G005857
1.43537	0.839	0.192	0	Ec_BodyCol/SC	HVAEP1-G011223
1.43326	0.78	0.068	0	Ec_BodyCol/SC	HVAEP1-G012626
1.4323	0.692	0.085	0	Ec_BodyCol/SC	HVAEP1-G002014
1.42622	0.788	0.063	0	Ec_BodyCol/SC	HVAEP1-G010157
1.42438	0.977	0.645	0	Ec_BodyCol/SC	HVAEP1-G001603
1.4154	0.937	0.142	0	Ec_BodyCol/SC	HVAEP1-G019714
1.40453	0.739	0.073	0	Ec_BodyCol/SC	HVAEP1-G027308
1.39658	0.691	0.071	0	Ec_BodyCol/SC	HVAEP1-G017741
1.37498	0.826	0.068	0	Ec_BodyCol/SC	HVAEP1-G015832
1.3744	0.823	0.324	0	Ec_BodyCol/SC	HVAEP1-G014848
1.37039	0.949	0.427	0	Ec_BodyCol/SC	HVAEP1-G026677
1.36834	0.207	0.011	0	Ec_BodyCol/SC	HVAEP1-G023240
1.35919	0.954	0.532	0	Ec_BodyCol/SC	HVAEP1-G008331
1.3492	0.429	0.032	0	Ec_BodyCol/SC	HVAEP1-G017759
1.34276	0.487	0.075	0	Ec_BodyCol/SC	HVAEP1-G028420
1.32182	0.764	0.072	0	Ec_BodyCol/SC	HVAEP1-G026507
1.3181	0.725	0.297	0	Ec_BodyCol/SC	HVAEP1-G007009
1.30593	0.724	0.047	0	Ec_BodyCol/SC	HVAEP1-G021698
1.30531	0.973	0.493	0	Ec_BodyCol/SC	HVAEP1-G026683
1.30319	0.826	0.192	0	Ec_BodyCol/SC	HVAEP1-G023551
1.29922	0.704	0.046	0	Ec_BodyCol/SC	HVAEP1-G023477
1.29502	0.703	0.053	0	Ec_BodyCol/SC	HVAEP1-G018200
1.29302	0.758	0.115	0	Ec_BodyCol/SC	HVAEP1-G026267
1.28594	0.7	0.169	0	Ec_BodyCol/SC	HVAEP1-G020899
1.2836	0.719	0.054	0	Ec_BodyCol/SC	HVAEP1-G005772
1.26326	0.7	0.056	0	Ec_BodyCol/SC	HVAEP1-G010061
1.25856	0.798	0.059	0	Ec_BodyCol/SC	HVAEP1-G011160
1.25758	0.858	0.246	0	Ec_BodyCol/SC	HVAEP1-G026033
1.25272	0.748	0.084	0	Ec_BodyCol/SC	HVAEP1-G022425
1.24095	0.758	0.132	0	Ec_BodyCol/SC	HVAEP1-G018273
1.2405	0.674	0.067	0	Ec_BodyCol/SC	HVAEP1-G016823
1.23359	0.831	0.262	0	Ec_BodyCol/SC	HVAEP1-G007689
1.23308	0.379	0.059	0	Ec_BodyCol/SC	HVAEP1-G015764
1.22386	0.287	0.044	0	Ec_BodyCol/SC	HVAEP1-G019297
1.19509	0.985	0.764	0	Ec_BodyCol/SC	HVAEP1-G008878
1.19381	0.711	0.095	0	Ec_BodyCol/SC	HVAEP1-G003239
1.19175	0.707	0.089	0	Ec_BodyCol/SC	HVAEP1-G021247
1.1914	0.715	0.045	0	Ec_BodyCol/SC	HVAEP1-G026973
1.19117	0.528	0.046	0	Ec_BodyCol/SC	HVAEP1-G012407
1.18911	0.984	0.66	0	Ec_BodyCol/SC	HVAEP1-G018663
1.17948	0.849	0.288	0	Ec_BodyCol/SC	HVAEP1-G025116
1.17924	0.634	0.024	0	Ec_BodyCol/SC	HVAEP1-G012762
1.17709	0.615	0.058	0	Ec_BodyCol/SC	HVAEP1-G024950
1.17184	0.541	0.092	0	Ec_BodyCol/SC	HVAEP1-G007988
1.17132	0.703	0.049	0	Ec_BodyCol/SC	HVAEP1-G001803
1.1701	0.672	0.079	0	Ec_BodyCol/SC	HVAEP1-G016202
1.16352	0.624	0.067	0	Ec_BodyCol/SC	HVAEP1-G015152
1.15345	0.782	0.155	0	Ec_BodyCol/SC	HVAEP1-G001464
1.15204	0.958	0.367	0	Ec_BodyCol/SC	HVAEP1-G003348
1.14974	0.961	0.539	0	Ec_BodyCol/SC	HVAEP1-G010998
1.14803	0.719	0.053	0	Ec_BodyCol/SC	HVAEP1-G026257
1.14733	0.701	0.088	0	Ec_BodyCol/SC	HVAEP1-G009473
1.14135	0.654	0.042	0	Ec_BodyCol/SC	HVAEP1-G024408
1.13354	0.801	0.158	0	Ec_BodyCol/SC	HVAEP1-G018081
1.12352	0.655	0.046	0	Ec_BodyCol/SC	HVAEP1-G001112
1.11815	0.999	0.871	0	Ec_BodyCol/SC	HVAEP1-G011242
1.09142	0.674	0.07	0	Ec_BodyCol/SC	HVAEP1-G004619
1.08601	0.656	0.057	0	Ec_BodyCol/SC	HVAEP1-G024291
1.08536	0.792	0.278	0	Ec_BodyCol/SC	HVAEP1-G027316
1.0814	0.709	0.067	0	Ec_BodyCol/SC	HVAEP1-G003961
1.07993	0.694	0.049	0	Ec_BodyCol/SC	HVAEP1-G002385
1.0722	0.999	0.827	0	Ec_BodyCol/SC	HVAEP1-G009417
1.07016	0.571	0.049	0	Ec_BodyCol/SC	HVAEP1-G013513
1.06876	0.6	0.054	0	Ec_BodyCol/SC	HVAEP1-G009707
1.06287	0.664	0.054	0	Ec_BodyCol/SC	HVAEP1-G013969
1.05795	0.882	0.422	0	Ec_BodyCol/SC	HVAEP1-G005912
1.05596	0.955	0.522	0	Ec_BodyCol/SC	HVAEP1-G009281
1.05203	0.849	0.402	0	Ec_BodyCol/SC	HVAEP1-G024806
1.0515	0.648	0.08	0	Ec_BodyCol/SC	HVAEP1-G016825
1.05141	0.738	0.1	0	Ec_BodyCol/SC	HVAEP1-G007545
1.04875	0.639	0.198	0	Ec_BodyCol/SC	HVAEP1-G002307
1.04734	0.927	0.57	0	Ec_BodyCol/SC	HVAEP1-G016721
1.0461	0.769	0.087	0	Ec_BodyCol/SC	HVAEP1-G026719
1.04278	0.626	0.045	0	Ec_BodyCol/SC	HVAEP1-G011284
1.04188	0.949	0.585	0	Ec_BodyCol/SC	HVAEP1-G003606
1.04053	0.996	0.769	0	Ec_BodyCol/SC	HVAEP1-G026401
1.02717	0.539	0.133	0	Ec_BodyCol/SC	HVAEP1-G009888
1.0216	0.72	0.089	0	Ec_BodyCol/SC	HVAEP1-G026947
1.01405	0.95	0.602	0	Ec_BodyCol/SC	HVAEP1-G008253
1.01385	0.654	0.156	0	Ec_BodyCol/SC	HVAEP1-G003883
1.00678	0.998	0.829	0	Ec_BodyCol/SC	HVAEP1-G017800
1.00431	0.744	0.34	0	Ec_BodyCol/SC	HVAEP1-G021648
1.00401	0.798	0.26	0	Ec_BodyCol/SC	HVAEP1-G015681
1.00359	0.526	0.034	0	Ec_BodyCol/SC	HVAEP1-G019057
1.00218	0.656	0.145	0	Ec_BodyCol/SC	HVAEP1-G005159
1.002	0.673	0.062	0	Ec_BodyCol/SC	HVAEP1-G019867
1.00189	0.743	0.272	0	Ec_BodyCol/SC	HVAEP1-G011898
1.35757	0.165	0.056	2.14076e-85	Ec_BodyCol/SC	HVAEP1-G002428
5.1122	0.79	0.042	0	Ec_Head	HVAEP1-G003533
4.71511	0.721	0.032	0	Ec_Head	HVAEP1-G003534
4.26839	0.951	0.059	0	Ec_Head	HVAEP1-G019237
3.90625	0.823	0.016	0	Ec_Head	HVAEP1-G003524
3.85949	0.989	0.127	0	Ec_Head	HVAEP1-G013830
3.27781	0.957	0.068	0	Ec_Head	HVAEP1-G021119
3.26771	0.961	0.094	0	Ec_Head	HVAEP1-G007990
3.06826	0.985	0.174	0	Ec_Head	HVAEP1-G007989
3.0295	0.95	0.103	0	Ec_Head	HVAEP1-G027308
2.83701	0.972	0.161	0	Ec_Head	HVAEP1-G015831
2.82925	0.964	0.133	0	Ec_Head	HVAEP1-G017197
2.79934	0.921	0.098	0	Ec_Head	HVAEP1-G017200
2.69323	0.99	0.247	0	Ec_Head	HVAEP1-G014774
2.54786	0.98	0.151	0	Ec_Head	HVAEP1-G025166
2.47744	0.938	0.119	0	Ec_Head	HVAEP1-G026719
2.37859	0.992	0.182	0	Ec_Head	HVAEP1-G005472
2.35408	0.979	0.188	0	Ec_Head	HVAEP1-G011465
2.33645	0.914	0.256	0	Ec_Head	HVAEP1-G020103
2.26879	0.965	0.176	0	Ec_Head	HVAEP1-G026265
2.24362	0.844	0.101	0	Ec_Head	HVAEP1-G026085
2.21388	0.97	0.177	0	Ec_Head	HVAEP1-G017195
2.14856	0.853	0.213	0	Ec_Head	HVAEP1-G009216
2.12875	0.891	0.106	0	Ec_Head	HVAEP1-G015832
2.11107	0.95	0.234	0	Ec_Head	HVAEP1-G012624
2.09628	0.981	0.247	0	Ec_Head	HVAEP1-G012478
2.06463	0.948	0.13	0	Ec_Head	HVAEP1-G011162
2.05451	0.943	0.179	0	Ec_Head	HVAEP1-G026215
2.04496	0.955	0.303	0	Ec_Head	HVAEP1-G014589
2.04446	0.985	0.236	0	Ec_Head	HVAEP1-G025159
2.03394	0.951	0.151	0	Ec_Head	HVAEP1-G016552
1.99574	0.803	0.108	0	Ec_Head	HVAEP1-G007988
1.97193	0.888	0.146	0	Ec_Head	HVAEP1-G026267
1.96201	0.96	0.193	0	Ec_Head	HVAEP1-G012630
1.93495	0.523	0.008	0	Ec_Head	HVAEP1-G003526
1.92506	0.951	0.14	0	Ec_Head	HVAEP1-G012596
1.8821	0.95	0.134	0	Ec_Head	HVAEP1-G017933
1.85994	0.776	0.063	0	Ec_Head	HVAEP1-G017894
1.85382	0.943	0.158	0	Ec_Head	HVAEP1-G026262
1.84437	1	0.829	0	Ec_Head	HVAEP1-G002398
1.77525	0.882	0.103	0	Ec_Head	HVAEP1-G011220
1.75499	0.94	0.179	0	Ec_Head	HVAEP1-G020288
1.74789	0.908	0.131	0	Ec_Head	HVAEP1-G012083
1.73724	0.97	0.291	0	Ec_Head	HVAEP1-G010277
1.70832	0.896	0.123	0	Ec_Head	HVAEP1-G011184
1.70626	0.946	0.165	0	Ec_Head	HVAEP1-G012473
1.68155	0.892	0.115	0	Ec_Head	HVAEP1-G020931
1.66986	0.911	0.122	0	Ec_Head	HVAEP1-G013426
1.66881	0.991	0.398	0	Ec_Head	HVAEP1-G003348
1.654	0.893	0.25	0	Ec_Head	HVAEP1-G008329
1.65399	0.935	0.281	0	Ec_Head	HVAEP1-G014114
1.63863	1	0.67	0	Ec_Head	HVAEP1-G023337
1.57699	0.421	0.053	0	Ec_Head	HVAEP1-G019297
1.54362	0.647	0.01	0	Ec_Head	HVAEP1-G027120
1.48759	0.772	0.085	0	Ec_Head	HVAEP1-G018647
1.46826	0.78	0.09	0	Ec_Head	HVAEP1-G007987
1.45783	0.449	0.056	0	Ec_Head	HVAEP1-G017139
1.44632	0.501	0.087	0	Ec_Head	HVAEP1-G017468
1.44022	0.884	0.136	0	Ec_Head	HVAEP1-G009910
1.42278	0.791	0.091	0	Ec_Head	HVAEP1-G017251
1.41191	0.982	0.519	0	Ec_Head	HVAEP1-G026683
1.41183	0.711	0.166	0	Ec_Head	HVAEP1-G028428
1.41045	0.965	0.454	0	Ec_Head	HVAEP1-G026677
1.40741	0.897	0.248	0	Ec_Head	HVAEP1-G018274
1.39868	0.805	0.192	0	Ec_Head	HVAEP1-G018081
1.38303	0.761	0.087	0	Ec_Head	HVAEP1-G017199
1.38062	0.765	0.081	0	Ec_Head	HVAEP1-G011189
1.37839	0.849	0.116	0	Ec_Head	HVAEP1-G005390
1.3733	0.891	0.288	0	Ec_Head	HVAEP1-G020105
1.36839	0.917	0.244	0	Ec_Head	HVAEP1-G023179
1.36004	0.452	0.053	0	Ec_Head	HVAEP1-G017759
1.34625	0.743	0.087	0	Ec_Head	HVAEP1-G024291
1.34413	0.645	0.05	0	Ec_Head	HVAEP1-G025039
1.33878	0.722	0.096	0	Ec_Head	HVAEP1-G004046
1.33458	0.94	0.184	0	Ec_Head	HVAEP1-G019714
1.31838	0.62	0.052	0	Ec_Head	HVAEP1-G012763
1.31148	0.722	0.16	0	Ec_Head	HVAEP1-G021905
1.3098	0.758	0.097	0	Ec_Head	HVAEP1-G012829
1.30746	0.543	0.084	0	Ec_Head	HVAEP1-G018934
1.30334	0.82	0.106	0	Ec_Head	HVAEP1-G023699
1.29087	0.647	0.151	0	Ec_Head	HVAEP1-G009888
1.28098	0.842	0.184	0	Ec_Head	HVAEP1-G005406
1.28051	0.78	0.106	0	Ec_Head	HVAEP1-G012626
1.25578	0.774	0.121	0	Ec_Head	HVAEP1-G026947
1.25495	0.823	0.129	0	Ec_Head	HVAEP1-G005857
1.25024	0.82	0.098	0	Ec_Head	HVAEP1-G011160
1.23738	0.708	0.103	0	Ec_Head	HVAEP1-G017741
1.22492	0.799	0.109	0	Ec_Head	HVAEP1-G006821
1.22374	0.605	0.058	0	Ec_Head	HVAEP1-G019057
1.21972	0.756	0.088	0	Ec_Head	HVAEP1-G005772
1.2197	0.799	0.188	0	Ec_Head	HVAEP1-G001464
1.21067	0.836	0.177	0	Ec_Head	HVAEP1-G027103
1.19886	0.795	0.172	0	Ec_Head	HVAEP1-G023047
1.19458	0.725	0.058	0	Ec_Head	HVAEP1-G019641
1.17204	0.538	0.071	0	Ec_Head	HVAEP1-G012407
1.17076	0.813	0.13	0	Ec_Head	HVAEP1-G001283
1.17061	0.8	0.152	0	Ec_Head	HVAEP1-G027100
1.16636	0.756	0.211	0	Ec_Head	HVAEP1-G019415
1.1591	0.489	0.037	0	Ec_Head	HVAEP1-G023882
1.15174	0.911	0.314	0	Ec_Head	HVAEP1-G028649
1.1474	0.618	0.043	0	Ec_Head	HVAEP1-G011146
1.14035	0.719	0.08	0	Ec_Head	HVAEP1-G026973
1.13622	0.703	0.088	0	Ec_Head	HVAEP1-G018200
1.12939	0.698	0.057	0	Ec_Head	HVAEP1-G019228
1.12827	0.626	0.099	0	Ec_Head	HVAEP1-G025454
1.11802	0.745	0.072	0	Ec_Head	HVAEP1-G018714
1.11582	0.748	0.097	0	Ec_Head	HVAEP1-G011732
1.10328	0.423	0.019	0	Ec_Head	HVAEP1-G002741
1.10073	0.796	0.228	0	Ec_Head	HVAEP1-G011223
1.10026	0.594	0.084	0	Ec_Head	HVAEP1-G009707
1.09026	0.73	0.101	0	Ec_Head	HVAEP1-G004619
1.07547	0.696	0.117	0	Ec_Head	HVAEP1-G002014
1.05342	0.496	0.012	0	Ec_Head	HVAEP1-G003477
1.04979	0.701	0.089	0	Ec_Head	HVAEP1-G026257
1.04953	0.686	0.076	0	Ec_Head	HVAEP1-G012086
1.0355	0.677	0.063	0	Ec_Head	HVAEP1-G014502
1.0348	0.475	0.024	0	Ec_Head	HVAEP1-G024705
1.03395	0.828	0.258	0	Ec_Head	HVAEP1-G025363
1.02074	0.683	0.129	0	Ec_Head	HVAEP1-G003239
1.02017	0.836	0.185	0	Ec_Head	HVAEP1-G007810
1.01657	0.772	0.135	0	Ec_Head	HVAEP1-G028010
1.01653	0.718	0.093	0	Ec_Head	HVAEP1-G019867
1.01618	0.635	0.069	0	Ec_Head	HVAEP1-G021429
1.01306	0.709	0.101	0	Ec_Head	HVAEP1-G003961
1.50131	0.906	0.348	2.09247e-303	Ec_Head	HVAEP1-G014848
1.41528	1	0.97	1.31218e-300	Ec_Head	HVAEP1-G002399
1.00124	0.738	0.222	5.33974e-285	Ec_Head	HVAEP1-G006074
1.13551	0.849	0.304	3.76529e-278	Ec_Head	HVAEP1-G027316
1.42926	1	0.942	1.33747e-268	Ec_Head	HVAEP1-G004300
1.14229	0.374	0.059	9.34938e-262	Ec_Head	HVAEP1-G017201
1.18534	0.995	0.768	2.31138e-260	Ec_Head	HVAEP1-G007419
1.02928	0.823	0.293	1.01859e-256	Ec_Head	HVAEP1-G007689
1.37184	0.984	0.662	2.57474e-256	Ec_Head	HVAEP1-G001603
1.2887	1	0.877	4.84172e-255	Ec_Head	HVAEP1-G011242
1.0822	0.836	0.319	1.88035e-254	Ec_Head	HVAEP1-G025116
1.16226	0.991	0.678	1.90788e-232	Ec_Head	HVAEP1-G018663
1.07393	0.769	0.297	3.17707e-221	Ec_Head	HVAEP1-G011898
1.18111	0.955	0.555	6.75959e-221	Ec_Head	HVAEP1-G008331
1.22237	0.966	0.561	2.73679e-216	Ec_Head	HVAEP1-G010998
1.08097	0.966	0.604	2.37345e-215	Ec_Head	HVAEP1-G003606
1.1389	0.999	0.836	1.8104e-212	Ec_Head	HVAEP1-G009417
1.06157	0.989	0.79	2.2693e-185	Ec_Head	HVAEP1-G011138
1.33879	0.403	0.108	5.42168e-142	Ec_Head	HVAEP1-G016410
3.77414	1	0.262	0	Ec_Peduncle	HVAEP1-G020103
3.58534	0.921	0.107	0	Ec_Peduncle	HVAEP1-G025178
3.45438	0.938	0.188	0	Ec_Peduncle	HVAEP1-G014587
3.43357	0.996	0.294	0	Ec_Peduncle	HVAEP1-G020105
3.34984	0.983	0.218	0	Ec_Peduncle	HVAEP1-G009216
3.28341	0.979	0.142	0	Ec_Peduncle	HVAEP1-G017197
2.98718	0.987	0.118	0	Ec_Peduncle	HVAEP1-G028442
2.97132	0.989	0.31	0	Ec_Peduncle	HVAEP1-G014589
2.85498	0.611	0.037	0	Ec_Peduncle	HVAEP1-G017316
2.81317	0.975	0.083	0	Ec_Peduncle	HVAEP1-G009707
2.80029	0.983	0.186	0	Ec_Peduncle	HVAEP1-G017195
2.75375	0.998	0.287	0	Ec_Peduncle	HVAEP1-G014114
2.70868	0.998	0.298	0	Ec_Peduncle	HVAEP1-G010277
2.67568	0.887	0.115	0	Ec_Peduncle	HVAEP1-G007988
2.66139	0.998	0.245	0	Ec_Peduncle	HVAEP1-G025159
2.61539	0.996	0.25	0	Ec_Peduncle	HVAEP1-G023179
2.59554	0.996	0.173	0	Ec_Peduncle	HVAEP1-G012473
2.57392	0.947	0.092	0	Ec_Peduncle	HVAEP1-G017199
2.54279	0.998	0.476	0	Ec_Peduncle	HVAEP1-G007807
2.52269	0.841	0.166	0	Ec_Peduncle	HVAEP1-G009194
2.4974	0.964	0.112	0	Ec_Peduncle	HVAEP1-G027308
2.45368	0.983	0.157	0	Ec_Peduncle	HVAEP1-G027100
2.39997	0.983	0.19	0	Ec_Peduncle	HVAEP1-G007810
2.39173	0.994	0.255	0	Ec_Peduncle	HVAEP1-G014774
2.33052	0.834	0.071	0	Ec_Peduncle	HVAEP1-G012407
2.31094	0.994	0.183	0	Ec_Peduncle	HVAEP1-G007989
2.2824	0.966	0.185	0	Ec_Peduncle	HVAEP1-G026265
2.26167	0.975	0.095	0	Ec_Peduncle	HVAEP1-G007987
2.2587	0.994	0.255	0	Ec_Peduncle	HVAEP1-G012478
2.22519	0.934	0.107	0	Ec_Peduncle	HVAEP1-G017200
2.21268	0.966	0.242	0	Ec_Peduncle	HVAEP1-G012624
2.20642	0.981	0.16	0	Ec_Peduncle	HVAEP1-G025166
2.20608	0.981	0.207	0	Ec_Peduncle	HVAEP1-G002427
2.18543	0.856	0.016	0	Ec_Peduncle	HVAEP1-G014497
2.18521	0.977	0.139	0	Ec_Peduncle	HVAEP1-G011162
2.16013	0.972	0.192	0	Ec_Peduncle	HVAEP1-G005472
2.13854	0.972	0.197	0	Ec_Peduncle	HVAEP1-G011465
2.12174	0.531	0.056	0	Ec_Peduncle	HVAEP1-G019297
2.05686	0.93	0.256	0	Ec_Peduncle	HVAEP1-G008329
2.04219	0.955	0.149	0	Ec_Peduncle	HVAEP1-G012596
2.0285	0.96	0.143	0	Ec_Peduncle	HVAEP1-G017933
2.01364	0.943	0.153	0	Ec_Peduncle	HVAEP1-G026267
1.96408	0.953	0.16	0	Ec_Peduncle	HVAEP1-G016552
1.9584	0.958	0.167	0	Ec_Peduncle	HVAEP1-G026262
1.95706	0.928	0.187	0	Ec_Peduncle	HVAEP1-G026215
1.94731	0.972	0.187	0	Ec_Peduncle	HVAEP1-G020288
1.93206	0.96	0.202	0	Ec_Peduncle	HVAEP1-G012630
1.91316	0.955	0.131	0	Ec_Peduncle	HVAEP1-G011184
1.80466	0.919	0.197	0	Ec_Peduncle	HVAEP1-G018081
1.7683	0.928	0.123	0	Ec_Peduncle	HVAEP1-G020931
1.74959	0.932	0.104	0	Ec_Peduncle	HVAEP1-G007990
1.73502	0.881	0.131	0	Ec_Peduncle	HVAEP1-G013426
1.72727	0.919	0.183	0	Ec_Peduncle	HVAEP1-G027103
1.70262	0.875	0.106	0	Ec_Peduncle	HVAEP1-G019520
1.69709	0.894	0.14	0	Ec_Peduncle	HVAEP1-G012083
1.64682	0.9	0.144	0	Ec_Peduncle	HVAEP1-G009910
1.63851	0.877	0.125	0	Ec_Peduncle	HVAEP1-G022425
1.63655	0.962	0.192	0	Ec_Peduncle	HVAEP1-G019714
1.6048	0.86	0.088	0	Ec_Peduncle	HVAEP1-G021698
1.57366	0.718	0.069	0	Ec_Peduncle	HVAEP1-G004354
1.56193	0.8	0.095	0	Ec_Peduncle	HVAEP1-G010061
1.55608	0.786	0.07	0	Ec_Peduncle	HVAEP1-G011734
1.5368	0.83	0.086	0	Ec_Peduncle	HVAEP1-G014910
1.5148	0.851	0.09	0	Ec_Peduncle	HVAEP1-G013005
1.50092	0.743	0.103	0	Ec_Peduncle	HVAEP1-G004046
1.49907	0.873	0.109	0	Ec_Peduncle	HVAEP1-G026085
1.49192	0.847	0.106	0	Ec_Peduncle	HVAEP1-G004619
1.48687	0.59	0.029	0	Ec_Peduncle	HVAEP1-G002435
1.48142	0.671	0.016	0	Ec_Peduncle	HVAEP1-G014500
1.47866	0.764	0.046	0	Ec_Peduncle	HVAEP1-G020671
1.44936	0.881	0.124	0	Ec_Peduncle	HVAEP1-G005390
1.44363	0.879	0.127	0	Ec_Peduncle	HVAEP1-G026947
1.4133	0.726	0.082	0	Ec_Peduncle	HVAEP1-G023954
1.40371	0.841	0.144	0	Ec_Peduncle	HVAEP1-G012298
1.38988	0.777	0.117	0	Ec_Peduncle	HVAEP1-G006821
1.38958	0.817	0.114	0	Ec_Peduncle	HVAEP1-G023699
1.38252	0.813	0.098	0	Ec_Peduncle	HVAEP1-G017251
1.37832	0.82	0.099	0	Ec_Peduncle	HVAEP1-G019867
1.36762	0.749	0.094	0	Ec_Peduncle	HVAEP1-G024291
1.35186	0.743	0.123	0	Ec_Peduncle	HVAEP1-G002014
1.3452	0.779	0.113	0	Ec_Peduncle	HVAEP1-G012626
1.32184	0.724	0.041	0	Ec_Peduncle	HVAEP1-G023466
1.32108	0.743	0.094	0	Ec_Peduncle	HVAEP1-G018200
1.32039	0.86	0.15	0	Ec_Peduncle	HVAEP1-G028686
1.31432	0.832	0.164	0	Ec_Peduncle	HVAEP1-G026521
1.31391	0.803	0.138	0	Ec_Peduncle	HVAEP1-G026864
1.31192	0.832	0.106	0	Ec_Peduncle	HVAEP1-G011160
1.31102	0.758	0.061	0	Ec_Peduncle	HVAEP1-G011361
1.30589	0.788	0.127	0	Ec_Peduncle	HVAEP1-G021247
1.30264	0.79	0.088	0	Ec_Peduncle	HVAEP1-G011189
1.30064	0.864	0.194	0	Ec_Peduncle	HVAEP1-G001464
1.29251	0.815	0.115	0	Ec_Peduncle	HVAEP1-G026507
1.28631	0.864	0.14	0	Ec_Peduncle	HVAEP1-G028010
1.28569	0.766	0.096	0	Ec_Peduncle	HVAEP1-G005772
1.25344	0.658	0.022	0	Ec_Peduncle	HVAEP1-G011054
1.25253	0.709	0.095	0	Ec_Peduncle	HVAEP1-G011047
1.24398	0.845	0.137	0	Ec_Peduncle	HVAEP1-G005857
1.224	0.724	0.071	0	Ec_Peduncle	HVAEP1-G005247
1.22242	0.775	0.147	0	Ec_Peduncle	HVAEP1-G027672
1.18495	0.522	0.057	0	Ec_Peduncle	HVAEP1-G011647
1.1788	0.684	0.055	0	Ec_Peduncle	HVAEP1-G011268
1.16268	0.841	0.129	0	Ec_Peduncle	HVAEP1-G026719
1.15598	0.796	0.138	0	Ec_Peduncle	HVAEP1-G001283
1.15262	0.735	0.083	0	Ec_Peduncle	HVAEP1-G001112
1.13867	0.715	0.088	0	Ec_Peduncle	HVAEP1-G026973
1.13459	0.645	0.019	0	Ec_Peduncle	HVAEP1-G003003
1.12884	0.788	0.135	0	Ec_Peduncle	HVAEP1-G014214
1.1174	0.639	0.02	0	Ec_Peduncle	HVAEP1-G026738
1.11335	0.692	0.072	0	Ec_Peduncle	HVAEP1-G015816
1.09983	0.688	0.093	0	Ec_Peduncle	HVAEP1-G013969
1.09663	0.675	0.044	0	Ec_Peduncle	HVAEP1-G001342
1.08604	0.726	0.064	0	Ec_Peduncle	HVAEP1-G028503
1.0832	0.669	0.078	0	Ec_Peduncle	HVAEP1-G014911
1.08178	0.72	0.074	0	Ec_Peduncle	HVAEP1-G021429
1.06415	0.769	0.08	0	Ec_Peduncle	HVAEP1-G005582
1.04855	0.677	0.105	0	Ec_Peduncle	HVAEP1-G016823
1.03666	0.682	0.06	0	Ec_Peduncle	HVAEP1-G021585
1.02659	0.764	0.114	0	Ec_Peduncle	HVAEP1-G011220
2.19953	0.979	0.353	8.64491e-287	Ec_Peduncle	HVAEP1-G014848
1.34483	0.841	0.2	1.96166e-282	Ec_Peduncle	HVAEP1-G020899
1.29685	0.837	0.208	7.65823e-280	Ec_Peduncle	HVAEP1-G010281
1.02008	0.601	0.096	3.07228e-275	Ec_Peduncle	HVAEP1-G018647
1.23519	0.856	0.221	5.32508e-266	Ec_Peduncle	HVAEP1-G011327
1.36183	0.979	0.327	8.04514e-260	Ec_Peduncle	HVAEP1-G002424
1.32759	0.856	0.232	2.67911e-254	Ec_Peduncle	HVAEP1-G023551
1.36778	0.904	0.292	3.79385e-250	Ec_Peduncle	HVAEP1-G015681
1.80168	0.955	0.366	3.99514e-249	Ec_Peduncle	HVAEP1-G024519
1.1034	0.762	0.182	2.47027e-244	Ec_Peduncle	HVAEP1-G023280
1.37171	0.699	0.141	5.87368e-242	Ec_Peduncle	HVAEP1-G013830
1.75453	0.779	0.197	6.45499e-241	Ec_Peduncle	HVAEP1-G020625
1.19828	0.834	0.234	1.98014e-228	Ec_Peduncle	HVAEP1-G011223
1.58613	0.989	0.404	1.92934e-226	Ec_Peduncle	HVAEP1-G003348
1.7307	0.49	0.079	8.80749e-225	Ec_Peduncle	HVAEP1-G027686
1.08821	0.832	0.229	2.49081e-224	Ec_Peduncle	HVAEP1-G022935
2.18963	1	0.831	1.06188e-221	Ec_Peduncle	HVAEP1-G002398
1.24826	0.573	0.106	7.23299e-221	Ec_Peduncle	HVAEP1-G025454
1.20358	0.73	0.172	9.06461e-217	Ec_Peduncle	HVAEP1-G028428
1.41973	0.879	0.321	1.01713e-210	Ec_Peduncle	HVAEP1-G028649
1.13269	0.72	0.176	2.14994e-209	Ec_Peduncle	HVAEP1-G005159
1.08044	0.699	0.173	1.59036e-200	Ec_Peduncle	HVAEP1-G018273
1.24344	0.873	0.298	1.74984e-199	Ec_Peduncle	HVAEP1-G007689
1.05656	0.792	0.237	2.8465e-197	Ec_Peduncle	HVAEP1-G015755
1.42418	0.996	0.784	3.87084e-193	Ec_Peduncle	HVAEP1-G026401
1.60129	1	0.971	3.2599e-192	Ec_Peduncle	HVAEP1-G002399
1.15392	0.894	0.324	2.93856e-190	Ec_Peduncle	HVAEP1-G025116
1.03949	0.892	0.341	8.35158e-180	Ec_Peduncle	HVAEP1-G007547
1.16827	1	0.64	1.7797e-177	Ec_Peduncle	HVAEP1-G005167
1.34448	0.964	0.491	2.63105e-177	Ec_Peduncle	HVAEP1-G008896
1.03401	0.815	0.257	3.31018e-175	Ec_Peduncle	HVAEP1-G018274
1.14484	0.718	0.193	1.02016e-173	Ec_Peduncle	HVAEP1-G005406
1.40465	0.979	0.559	1.04092e-173	Ec_Peduncle	HVAEP1-G008331
1.2781	0.968	0.46	1.86711e-173	Ec_Peduncle	HVAEP1-G026677
1.32976	0.975	0.608	5.7144e-173	Ec_Peduncle	HVAEP1-G003606
1.56545	0.996	0.674	1.37681e-172	Ec_Peduncle	HVAEP1-G023337
1.48659	0.987	0.666	2.31024e-172	Ec_Peduncle	HVAEP1-G001603
1.28708	0.994	0.771	4.06164e-169	Ec_Peduncle	HVAEP1-G007419
1.23699	0.975	0.524	2.58659e-168	Ec_Peduncle	HVAEP1-G026683
1.02119	0.8	0.276	5.81624e-166	Ec_Peduncle	HVAEP1-G020084
1.08088	0.885	0.369	1.14158e-162	Ec_Peduncle	HVAEP1-G003882
1.22148	0.369	0.059	1.16851e-161	Ec_Peduncle	HVAEP1-G017759
1.05192	0.911	0.393	4.93497e-159	Ec_Peduncle	HVAEP1-G017273
1.27387	0.998	0.681	1.84008e-158	Ec_Peduncle	HVAEP1-G018663
1.29393	0.979	0.565	3.10983e-151	Ec_Peduncle	HVAEP1-G010998
1.08178	0.966	0.552	7.96228e-142	Ec_Peduncle	HVAEP1-G010311
1.093	0.904	0.451	1.28932e-139	Ec_Peduncle	HVAEP1-G005912
1.04776	0.811	0.329	7.77349e-135	Ec_Peduncle	HVAEP1-G014609
1.12114	0.998	0.838	1.24034e-134	Ec_Peduncle	HVAEP1-G009417
1.04979	0.735	0.26	2.0088e-132	Ec_Peduncle	HVAEP1-G021844
1.02446	0.934	0.476	1.38576e-128	Ec_Peduncle	HVAEP1-G004718
1.068	0.998	0.725	1.7401e-121	Ec_Peduncle	HVAEP1-G006416
1.10189	0.998	0.725	1.88453e-119	Ec_Peduncle	HVAEP1-G023161
1.08369	0.97	0.778	2.30886e-118	Ec_Peduncle	HVAEP1-G008878
1.21498	0.461	0.111	1.43491e-116	Ec_Peduncle	HVAEP1-G016410
1.05963	1	0.84	3.9652e-116	Ec_Peduncle	HVAEP1-G017800
1.00992	1	0.879	3.1892e-111	Ec_Peduncle	HVAEP1-G011242
1.15366	0.985	0.686	8.20005e-111	Ec_Peduncle	HVAEP1-G021685
1.05557	0.932	0.593	1.02766e-110	Ec_Peduncle	HVAEP1-G016721
1.18796	0.527	0.159	1.05612e-110	Ec_Peduncle	HVAEP1-G009888
1.07078	0.917	0.575	3.15704e-101	Ec_Peduncle	HVAEP1-G013452
1.22493	0.722	0.324	7.03484e-95	Ec_Peduncle	HVAEP1-G007009
1.01887	0.754	0.39	1.59976e-78	Ec_Peduncle	HVAEP1-G005620
4.13984	0.871	0.029	0	Ec_Tentacle	HVAEP1-G018881
3.75126	1	0.173	0	Ec_Tentacle	HVAEP1-G015831
3.55435	0.268	0.012	0	Ec_Tentacle	HVAEP1-G018487
3.548	0.997	0.245	0	Ec_Tentacle	HVAEP1-G012624
3.44151	0.944	0.107	0	Ec_Tentacle	HVAEP1-G026422
3.36371	0.985	0.258	0	Ec_Tentacle	HVAEP1-G014774
3.12578	0.956	0.088	0	Ec_Tentacle	HVAEP1-G017468
3.08475	0.844	0.012	0	Ec_Tentacle	HVAEP1-G012451
3.06475	0.932	0.118	0	Ec_Tentacle	HVAEP1-G015832
2.96894	0.985	0.205	0	Ec_Tentacle	HVAEP1-G012630
2.95139	0.979	0.195	0	Ec_Tentacle	HVAEP1-G005472
2.92813	0.906	0.029	0	Ec_Tentacle	HVAEP1-G019535
2.90022	0.906	0.082	0	Ec_Tentacle	HVAEP1-G000953
2.85906	0.976	0.163	0	Ec_Tentacle	HVAEP1-G016552
2.80466	0.903	0.017	0	Ec_Tentacle	HVAEP1-G018198
2.73037	0.921	0.054	0	Ec_Tentacle	HVAEP1-G000946
2.71211	0.941	0.135	0	Ec_Tentacle	HVAEP1-G011184
2.66281	0.95	0.131	0	Ec_Tentacle	HVAEP1-G026719
2.63841	0.947	0.164	0	Ec_Tentacle	HVAEP1-G025166
2.62866	0.988	0.146	0	Ec_Tentacle	HVAEP1-G017933
2.57297	0.971	0.2	0	Ec_Tentacle	HVAEP1-G011465
2.56775	0.824	0.023	0	Ec_Tentacle	HVAEP1-G008449
2.54798	0.965	0.153	0	Ec_Tentacle	HVAEP1-G012596
2.51822	0.897	0.095	0	Ec_Tentacle	HVAEP1-G018647
2.46347	0.941	0.189	0	Ec_Tentacle	HVAEP1-G026265
2.42619	0.929	0.143	0	Ec_Tentacle	HVAEP1-G012083
2.40784	0.844	0.021	0	Ec_Tentacle	HVAEP1-G019850
2.38702	0.818	0.016	0	Ec_Tentacle	HVAEP1-G026505
2.31983	0.818	0.038	0	Ec_Tentacle	HVAEP1-G009891
2.31458	0.676	0.076	0	Ec_Tentacle	HVAEP1-G017808
2.30772	0.932	0.134	0	Ec_Tentacle	HVAEP1-G013426
2.2945	0.959	0.143	0	Ec_Tentacle	HVAEP1-G011162
2.27574	0.406	0.003	0	Ec_Tentacle	HVAEP1-G013467
2.25622	0.918	0.141	0	Ec_Tentacle	HVAEP1-G007545
2.18369	0.809	0.011	0	Ec_Tentacle	HVAEP1-G021275
2.17619	0.812	0.014	0	Ec_Tentacle	HVAEP1-G008234
2.09281	0.803	0.063	0	Ec_Tentacle	HVAEP1-G007674
2.0875	0.894	0.115	0	Ec_Tentacle	HVAEP1-G012626
2.0793	0.674	0.06	0	Ec_Tentacle	HVAEP1-G013925
2.07344	0.897	0.119	0	Ec_Tentacle	HVAEP1-G006821
2.07279	0.871	0.18	0	Ec_Tentacle	HVAEP1-G014691
2.06986	0.847	0.091	0	Ec_Tentacle	HVAEP1-G009985
2.03122	0.847	0.078	0	Ec_Tentacle	HVAEP1-G003935
1.9789	0.824	0.015	0	Ec_Tentacle	HVAEP1-G025143
1.97416	0.906	0.174	0	Ec_Tentacle	HVAEP1-G003944
1.95375	0.715	0.004	0	Ec_Tentacle	HVAEP1-G026266
1.94015	0.844	0.13	0	Ec_Tentacle	HVAEP1-G026947
1.92691	0.774	0.093	0	Ec_Tentacle	HVAEP1-G001803
1.88898	0.626	0.003	0	Ec_Tentacle	HVAEP1-G012010
1.87902	0.832	0.111	0	Ec_Tentacle	HVAEP1-G017741
1.85659	0.821	0.107	0	Ec_Tentacle	HVAEP1-G012829
1.85512	0.85	0.109	0	Ec_Tentacle	HVAEP1-G004619
1.83787	0.8	0.1	0	Ec_Tentacle	HVAEP1-G016296
1.82831	0.788	0.1	0	Ec_Tentacle	HVAEP1-G020480
1.80842	0.953	0.177	0	Ec_Tentacle	HVAEP1-G012473
1.80017	0.803	0.105	0	Ec_Tentacle	HVAEP1-G025454
1.78818	0.771	0.016	0	Ec_Tentacle	HVAEP1-G010524
1.78707	0.768	0.054	0	Ec_Tentacle	HVAEP1-G002179
1.75809	0.765	0.044	0	Ec_Tentacle	HVAEP1-G024210
1.74815	0.844	0.109	0	Ec_Tentacle	HVAEP1-G008068
1.73711	0.821	0.097	0	Ec_Tentacle	HVAEP1-G026257
1.73304	0.826	0.128	0	Ec_Tentacle	HVAEP1-G005390
1.71557	0.824	0.134	0	Ec_Tentacle	HVAEP1-G003231
1.70057	0.744	0.05	0	Ec_Tentacle	HVAEP1-G011146
1.69699	0.776	0.084	0	Ec_Tentacle	HVAEP1-G012086
1.68053	0.759	0.092	0	Ec_Tentacle	HVAEP1-G011189
1.66638	0.682	0.015	0	Ec_Tentacle	HVAEP1-G019849
1.66217	0.429	0.021	0	Ec_Tentacle	HVAEP1-G006659
1.65892	0.529	0.031	0	Ec_Tentacle	HVAEP1-G026258
1.65881	0.829	0.137	0	Ec_Tentacle	HVAEP1-G009905
1.6271	0.724	0.075	0	Ec_Tentacle	HVAEP1-G026398
1.6266	0.729	0.071	0	Ec_Tentacle	HVAEP1-G007208
1.62356	0.732	0.032	0	Ec_Tentacle	HVAEP1-G003235
1.60715	0.618	0.051	0	Ec_Tentacle	HVAEP1-G006694
1.52977	0.744	0.046	0	Ec_Tentacle	HVAEP1-G012817
1.52057	0.606	0.01	0	Ec_Tentacle	HVAEP1-G008979
1.51859	0.85	0.137	0	Ec_Tentacle	HVAEP1-G007829
1.50926	0.671	0.005	0	Ec_Tentacle	HVAEP1-G026506
1.50525	0.574	0.002	0	Ec_Tentacle	HVAEP1-G025142
1.50211	0.794	0.109	0	Ec_Tentacle	HVAEP1-G003961
1.48778	0.194	0.004	0	Ec_Tentacle	HVAEP1-G006662
1.48532	0.656	0.021	0	Ec_Tentacle	HVAEP1-G010410
1.47982	0.732	0.076	0	Ec_Tentacle	HVAEP1-G022506
1.47586	0.8	0.109	0	Ec_Tentacle	HVAEP1-G011160
1.46284	0.618	0.022	0	Ec_Tentacle	HVAEP1-G006514
1.45999	0.697	0.085	0	Ec_Tentacle	HVAEP1-G010523
1.4588	0.668	0.009	0	Ec_Tentacle	HVAEP1-G017764
1.4502	0.715	0.037	0	Ec_Tentacle	HVAEP1-G015075
1.43801	0.794	0.117	0	Ec_Tentacle	HVAEP1-G011220
1.42978	0.568	0.006	0	Ec_Tentacle	HVAEP1-G012460
1.42162	0.735	0.054	0	Ec_Tentacle	HVAEP1-G005299
1.37983	0.668	0.014	0	Ec_Tentacle	HVAEP1-G023004
1.36922	0.591	0.042	0	Ec_Tentacle	HVAEP1-G025584
1.36009	0.741	0.082	0	Ec_Tentacle	HVAEP1-G003371
1.35675	0.682	0.091	0	Ec_Tentacle	HVAEP1-G014910
1.35467	0.674	0.067	0	Ec_Tentacle	HVAEP1-G024024
1.34299	0.75	0.095	0	Ec_Tentacle	HVAEP1-G013969
1.34292	0.685	0.071	0	Ec_Tentacle	HVAEP1-G018885
1.32403	0.612	0.012	0	Ec_Tentacle	HVAEP1-G016114
1.3223	0.741	0.097	0	Ec_Tentacle	HVAEP1-G010190
1.27663	0.718	0.094	0	Ec_Tentacle	HVAEP1-G005224
1.27423	0.706	0.052	0	Ec_Tentacle	HVAEP1-G025883
1.26543	0.494	0.044	0	Ec_Tentacle	HVAEP1-G001808
1.26086	0.726	0.106	0	Ec_Tentacle	HVAEP1-G018282
1.25678	0.624	0.055	0	Ec_Tentacle	HVAEP1-G003376
1.22688	0.415	0.002	0	Ec_Tentacle	HVAEP1-G003668
1.18048	0.647	0.043	0	Ec_Tentacle	HVAEP1-G010424
1.17891	0.641	0.054	0	Ec_Tentacle	HVAEP1-G001245
1.16248	0.618	0.021	0	Ec_Tentacle	HVAEP1-G027015
1.16024	0.638	0.043	0	Ec_Tentacle	HVAEP1-G007941
1.15067	0.662	0.068	0	Ec_Tentacle	HVAEP1-G019228
1.14614	0.609	0.06	0	Ec_Tentacle	HVAEP1-G012808
1.12691	0.518	0.044	0	Ec_Tentacle	HVAEP1-G023882
1.1252	0.644	0.076	0	Ec_Tentacle	HVAEP1-G004565
1.11573	0.594	0.063	0	Ec_Tentacle	HVAEP1-G010191
1.1157	0.6	0.055	0	Ec_Tentacle	HVAEP1-G006957
1.11537	0.629	0.02	0	Ec_Tentacle	HVAEP1-G027014
1.11195	0.606	0.038	0	Ec_Tentacle	HVAEP1-G019584
1.10892	0.606	0.041	0	Ec_Tentacle	HVAEP1-G001326
1.10796	0.65	0.06	0	Ec_Tentacle	HVAEP1-G017703
1.10366	0.597	0.067	0	Ec_Tentacle	HVAEP1-G013558
1.10187	0.615	0.06	0	Ec_Tentacle	HVAEP1-G011362
1.0878	0.609	0.053	0	Ec_Tentacle	HVAEP1-G009849
1.0831	0.641	0.079	0	Ec_Tentacle	HVAEP1-G010862
1.0766	0.541	0.03	0	Ec_Tentacle	HVAEP1-G024510
1.06121	0.632	0.077	0	Ec_Tentacle	HVAEP1-G004999
1.05701	0.565	0.03	0	Ec_Tentacle	HVAEP1-G014489
1.05319	0.559	0.052	0	Ec_Tentacle	HVAEP1-G013557
1.0436	0.582	0.045	0	Ec_Tentacle	HVAEP1-G017542
1.03293	0.506	0.029	0	Ec_Tentacle	HVAEP1-G009881
1.02829	0.547	0.015	0	Ec_Tentacle	HVAEP1-G021359
1.01451	0.565	0.053	0	Ec_Tentacle	HVAEP1-G005944
1.01361	0.612	0.053	0	Ec_Tentacle	HVAEP1-G020122
1.58845	0.735	0.107	9.20409e-302	Ec_Tentacle	HVAEP1-G016823
1.98349	0.891	0.171	5.92383e-301	Ec_Tentacle	HVAEP1-G026262
1.24629	0.715	0.099	6.75914e-296	Ec_Tentacle	HVAEP1-G005772
1.26044	0.694	0.1	2.40173e-292	Ec_Tentacle	HVAEP1-G021556
1.89464	0.941	0.196	6.85065e-292	Ec_Tentacle	HVAEP1-G019714
1.22595	0.691	0.099	4.99941e-291	Ec_Tentacle	HVAEP1-G020087
2.59301	0.988	0.259	1.38461e-285	Ec_Tentacle	HVAEP1-G012478
1.40843	0.726	0.113	4.66321e-284	Ec_Tentacle	HVAEP1-G011823
1.12609	0.541	0.063	5.09081e-275	Ec_Tentacle	HVAEP1-G020260
1.15083	0.556	0.066	4.90882e-273	Ec_Tentacle	HVAEP1-G010167
1.20974	0.694	0.108	1.03457e-270	Ec_Tentacle	HVAEP1-G011732
1.27822	0.732	0.113	1.34205e-270	Ec_Tentacle	HVAEP1-G010157
1.01532	0.644	0.088	1.52409e-270	Ec_Tentacle	HVAEP1-G010018
1.33924	0.803	0.141	5.94163e-267	Ec_Tentacle	HVAEP1-G026864
1.26639	0.647	0.095	2.83102e-262	Ec_Tentacle	HVAEP1-G027409
1.03217	0.632	0.088	1.18942e-261	Ec_Tentacle	HVAEP1-G028480
1.47215	0.794	0.144	2.45186e-259	Ec_Tentacle	HVAEP1-G028010
1.00302	0.594	0.083	6.48502e-253	Ec_Tentacle	HVAEP1-G013972
1.38839	0.706	0.125	6.69832e-246	Ec_Tentacle	HVAEP1-G006474
1.29594	0.556	0.075	1.00448e-244	Ec_Tentacle	HVAEP1-G027448
2.25011	0.874	0.191	9.3459e-244	Ec_Tentacle	HVAEP1-G026215
1.23512	0.7	0.128	5.10765e-240	Ec_Tentacle	HVAEP1-G021352
1.53525	0.788	0.168	8.88571e-237	Ec_Tentacle	HVAEP1-G021905
1.70645	0.829	0.2	3.39429e-223	Ec_Tentacle	HVAEP1-G016332
1.82245	0.894	0.266	1.05695e-216	Ec_Tentacle	HVAEP1-G025363
1.23461	0.738	0.142	4.51715e-215	Ec_Tentacle	HVAEP1-G001283
1.52559	0.853	0.194	6.98928e-214	Ec_Tentacle	HVAEP1-G005406
1.23475	0.609	0.099	1.84718e-213	Ec_Tentacle	HVAEP1-G024291
1.19121	0.718	0.151	8.1998e-212	Ec_Tentacle	HVAEP1-G024476
1.46104	0.706	0.129	6.02881e-209	Ec_Tentacle	HVAEP1-G020931
1.15717	0.612	0.106	1.59626e-208	Ec_Tentacle	HVAEP1-G022703
1.05913	0.479	0.062	5.59612e-208	Ec_Tentacle	HVAEP1-G019231
2.40343	0.979	0.407	2.90487e-206	Ec_Tentacle	HVAEP1-G003348
1.29913	0.779	0.186	3.66297e-206	Ec_Tentacle	HVAEP1-G016261
1.45887	0.712	0.149	1.29034e-204	Ec_Tentacle	HVAEP1-G020078
1.27713	0.703	0.137	5.25778e-203	Ec_Tentacle	HVAEP1-G003239
1.45994	0.785	0.192	5.78874e-203	Ec_Tentacle	HVAEP1-G011001
1.57735	0.847	0.226	8.98309e-203	Ec_Tentacle	HVAEP1-G000513
1.44084	0.738	0.175	1.9806e-191	Ec_Tentacle	HVAEP1-G018273
1.01485	0.685	0.126	6.98867e-191	Ec_Tentacle	HVAEP1-G002014
1.07285	0.671	0.14	2.75989e-187	Ec_Tentacle	HVAEP1-G022189
2.11358	0.944	0.302	5.09233e-187	Ec_Tentacle	HVAEP1-G010277
1.43554	0.853	0.235	5.17772e-184	Ec_Tentacle	HVAEP1-G023551
2.82434	1	0.832	8.06663e-184	Ec_Tentacle	HVAEP1-G002398
2.43268	1	0.971	1.72694e-183	Ec_Tentacle	HVAEP1-G002399
1.62427	0.841	0.277	1.42236e-181	Ec_Tentacle	HVAEP1-G001883
2.18306	1	0.838	9.61079e-179	Ec_Tentacle	HVAEP1-G009417
1.09023	0.65	0.136	2.72267e-178	Ec_Tentacle	HVAEP1-G017131
1.2612	0.659	0.14	1.09125e-176	Ec_Tentacle	HVAEP1-G006453
1.62142	0.791	0.202	4.46103e-175	Ec_Tentacle	HVAEP1-G018081
1.24953	0.782	0.198	1.12897e-174	Ec_Tentacle	HVAEP1-G001464
1.13706	0.724	0.182	5.15552e-174	Ec_Tentacle	HVAEP1-G011693
1.21163	0.812	0.227	1.69559e-172	Ec_Tentacle	HVAEP1-G025364
1.0926	0.659	0.144	2.25748e-172	Ec_Tentacle	HVAEP1-G017765
1.11648	0.674	0.154	1.74518e-169	Ec_Tentacle	HVAEP1-G022130
1.17997	0.747	0.195	1.32008e-167	Ec_Tentacle	HVAEP1-G020833
1.07044	0.671	0.156	5.61714e-164	Ec_Tentacle	HVAEP1-G016356
1.27006	0.847	0.271	2.67359e-162	Ec_Tentacle	HVAEP1-G011277
1.68981	0.871	0.326	2.8816e-161	Ec_Tentacle	HVAEP1-G025116
1.3496	0.8	0.232	4.39916e-161	Ec_Tentacle	HVAEP1-G022935
1.177	0.718	0.185	1.36201e-160	Ec_Tentacle	HVAEP1-G026642
1.77369	0.994	0.682	6.82426e-159	Ec_Tentacle	HVAEP1-G018663
1.45539	0.871	0.3	7.58427e-157	Ec_Tentacle	HVAEP1-G007689
1.42573	0.865	0.312	1.26129e-156	Ec_Tentacle	HVAEP1-G011671
1.17143	0.785	0.238	4.48003e-155	Ec_Tentacle	HVAEP1-G011412
1.06632	0.776	0.188	8.79317e-155	Ec_Tentacle	HVAEP1-G027103
1.15656	0.715	0.185	9.07126e-155	Ec_Tentacle	HVAEP1-G023280
1.03439	0.688	0.178	4.24148e-152	Ec_Tentacle	HVAEP1-G024886
1.03561	0.626	0.142	5.95228e-150	Ec_Tentacle	HVAEP1-G024965
1.20509	0.738	0.214	6.15331e-150	Ec_Tentacle	HVAEP1-G006498
2.13266	0.991	0.68	4.33563e-149	Ec_Tentacle	HVAEP1-G011727
1.16501	0.876	0.249	8.84801e-147	Ec_Tentacle	HVAEP1-G025159
1.99489	0.988	0.667	1.10432e-146	Ec_Tentacle	HVAEP1-G001603
1.03863	0.565	0.108	7.95067e-145	Ec_Tentacle	HVAEP1-G004046
1.22859	0.829	0.285	5.58274e-143	Ec_Tentacle	HVAEP1-G010601
1.19744	0.618	0.139	1.93214e-141	Ec_Tentacle	HVAEP1-G025286
1.18481	0.812	0.287	1.30354e-138	Ec_Tentacle	HVAEP1-G019937
1.71904	0.994	0.776	1.31298e-137	Ec_Tentacle	HVAEP1-G005908
1.62907	0.997	0.726	2.37803e-136	Ec_Tentacle	HVAEP1-G023161
1.15359	0.812	0.26	2.80282e-135	Ec_Tentacle	HVAEP1-G018274
1.31822	0.776	0.284	2.9055e-135	Ec_Tentacle	HVAEP1-G006153
1.08205	0.703	0.197	4.15057e-135	Ec_Tentacle	HVAEP1-G026355
1.45547	0.994	0.642	2.645e-132	Ec_Tentacle	HVAEP1-G005167
1.56096	0.968	0.61	5.76687e-132	Ec_Tentacle	HVAEP1-G003606
1.15126	0.806	0.281	1.44112e-129	Ec_Tentacle	HVAEP1-G022578
1.50045	0.853	0.362	3.36796e-129	Ec_Tentacle	HVAEP1-G006135
1.17782	0.876	0.365	1.79954e-128	Ec_Tentacle	HVAEP1-G002078
1.06257	0.782	0.261	1.07054e-127	Ec_Tentacle	HVAEP1-G011131
1.36335	0.882	0.386	8.85506e-125	Ec_Tentacle	HVAEP1-G010043
1.16701	0.885	0.391	3.12508e-124	Ec_Tentacle	HVAEP1-G005226
1.00052	0.668	0.197	3.95922e-123	Ec_Tentacle	HVAEP1-G013752
1.30591	0.926	0.452	9.62813e-122	Ec_Tentacle	HVAEP1-G005912
1.81071	0.979	0.676	3.00832e-120	Ec_Tentacle	HVAEP1-G023337
1.61234	0.994	0.793	5.29876e-120	Ec_Tentacle	HVAEP1-G011138
1.30286	0.865	0.395	2.31815e-119	Ec_Tentacle	HVAEP1-G017273
1.47483	1	0.879	1.04983e-117	Ec_Tentacle	HVAEP1-G011242
1.66022	1	0.821	2.28373e-117	Ec_Tentacle	HVAEP1-G009544
1.02442	0.785	0.285	3.52027e-115	Ec_Tentacle	HVAEP1-G011249
1.09361	0.779	0.275	3.72219e-111	Ec_Tentacle	HVAEP1-G001083
1.2688	0.521	0.116	4.46763e-111	Ec_Tentacle	HVAEP1-G026085
1.51213	0.859	0.41	9.79781e-110	Ec_Tentacle	HVAEP1-G003732
1.28714	0.941	0.609	1.70256e-108	Ec_Tentacle	HVAEP1-G018371
1.34309	0.356	0.059	9.33322e-108	Ec_Tentacle	HVAEP1-G003533
1.36058	0.826	0.367	7.14844e-105	Ec_Tentacle	HVAEP1-G021648
1.10593	0.818	0.375	7.14784e-102	Ec_Tentacle	HVAEP1-G021539
1.16635	0.882	0.498	1.89932e-101	Ec_Tentacle	HVAEP1-G023764
1.50071	0.874	0.391	5.0561e-101	Ec_Tentacle	HVAEP1-G002395
1.13174	0.876	0.39	9.05553e-100	Ec_Tentacle	HVAEP1-G026986
1.36197	0.876	0.449	1.45759e-97	Ec_Tentacle	HVAEP1-G010140
1.02823	0.888	0.516	3.25823e-96	Ec_Tentacle	HVAEP1-G021517
1.3769	0.968	0.752	7.60755e-96	Ec_Tentacle	HVAEP1-G023581
1.24755	0.303	0.048	1.60624e-95	Ec_Tentacle	HVAEP1-G003534
1.08922	0.682	0.253	1.60761e-95	Ec_Tentacle	HVAEP1-G009956
1.15237	0.947	0.626	1.6887e-90	Ec_Tentacle	HVAEP1-G008253
1.24515	0.871	0.464	4.28837e-88	Ec_Tentacle	HVAEP1-G026677
1.06092	1	0.871	6.04357e-87	Ec_Tentacle	HVAEP1-G021417
1.14253	0.903	0.532	1.10941e-84	Ec_Tentacle	HVAEP1-G011900
1.11709	0.929	0.561	5.31198e-83	Ec_Tentacle	HVAEP1-G008331
1.24188	0.882	0.527	1.36354e-82	Ec_Tentacle	HVAEP1-G026683
1.02996	0.629	0.224	1.04544e-79	Ec_Tentacle	HVAEP1-G004836
1.04149	0.882	0.513	3.10168e-79	Ec_Tentacle	HVAEP1-G021516
1.10421	0.988	0.841	6.66454e-79	Ec_Tentacle	HVAEP1-G017800
1.06403	0.918	0.63	1.633e-71	Ec_Tentacle	HVAEP1-G023014
1.2558	0.821	0.454	1.83505e-71	Ec_Tentacle	HVAEP1-G010053
1.41442	0.715	0.357	8.09157e-71	Ec_Tentacle	HVAEP1-G022018
1.21612	0.971	0.791	9.18166e-71	Ec_Tentacle	HVAEP1-G014553
1.14253	0.568	0.214	5.9503e-66	Ec_Tentacle	HVAEP1-G010281
1.00379	0.847	0.494	1.03857e-63	Ec_Tentacle	HVAEP1-G008896
1.36897	0.726	0.359	8.41187e-58	Ec_Tentacle	HVAEP1-G014848
1.235	0.656	0.327	8.10899e-47	Ec_Tentacle	HVAEP1-G007009
1.06924	0.282	0.082	1.26759e-37	Ec_Tentacle	HVAEP1-G015764
3.17542	0.989	0.221	0	En_BodyCol/SC	HVAEP1-G001579
3.14032	1	0.672	0	En_BodyCol/SC	HVAEP1-G009435
3.08849	0.988	0.215	0	En_BodyCol/SC	HVAEP1-G016006
3.06989	1	0.482	0	En_BodyCol/SC	HVAEP1-G006331
3.05363	1	0.48	0	En_BodyCol/SC	HVAEP1-G011731
2.93467	0.97	0.191	0	En_BodyCol/SC	HVAEP1-G019185
2.87537	1	0.464	0	En_BodyCol/SC	HVAEP1-G001578
2.72506	0.995	0.305	0	En_BodyCol/SC	HVAEP1-G004160
2.72337	0.97	0.232	0	En_BodyCol/SC	HVAEP1-G009438
2.7085	1	0.366	0	En_BodyCol/SC	HVAEP1-G009436
2.65168	1	0.405	0	En_BodyCol/SC	HVAEP1-G023243
2.63255	1	0.391	0	En_BodyCol/SC	HVAEP1-G027231
2.5823	0.998	0.337	0	En_BodyCol/SC	HVAEP1-G009433
2.55421	1	0.535	0	En_BodyCol/SC	HVAEP1-G006657
2.50525	0.992	0.249	0	En_BodyCol/SC	HVAEP1-G007134
2.49154	0.99	0.277	0	En_BodyCol/SC	HVAEP1-G007132
2.46613	0.993	0.313	0	En_BodyCol/SC	HVAEP1-G001637
2.45273	0.986	0.222	0	En_BodyCol/SC	HVAEP1-G011697
2.31713	0.679	0.089	0	En_BodyCol/SC	HVAEP1-G009439
2.26373	0.983	0.205	0	En_BodyCol/SC	HVAEP1-G020294
2.2625	0.986	0.324	0	En_BodyCol/SC	HVAEP1-G006793
2.23598	0.965	0.187	0	En_BodyCol/SC	HVAEP1-G009552
2.21096	0.958	0.2	0	En_BodyCol/SC	HVAEP1-G008367
2.17795	1	0.544	0	En_BodyCol/SC	HVAEP1-G024923
2.16271	0.769	0.135	0	En_BodyCol/SC	HVAEP1-G002112
2.13121	0.984	0.28	0	En_BodyCol/SC	HVAEP1-G013547
2.10357	0.949	0.205	0	En_BodyCol/SC	HVAEP1-G001235
2.04962	0.872	0.113	0	En_BodyCol/SC	HVAEP1-G001163
2.03006	0.986	0.462	0	En_BodyCol/SC	HVAEP1-G011608
2.02341	0.92	0.132	0	En_BodyCol/SC	HVAEP1-G009288
2.01132	0.976	0.324	0	En_BodyCol/SC	HVAEP1-G007808
1.92609	0.988	0.351	0	En_BodyCol/SC	HVAEP1-G019607
1.91622	0.987	0.226	0	En_BodyCol/SC	HVAEP1-G023175
1.91492	0.962	0.318	0	En_BodyCol/SC	HVAEP1-G023860
1.89956	0.957	0.162	0	En_BodyCol/SC	HVAEP1-G005336
1.88678	0.967	0.355	0	En_BodyCol/SC	HVAEP1-G007978
1.83274	0.863	0.094	0	En_BodyCol/SC	HVAEP1-G011729
1.82816	0.99	0.302	0	En_BodyCol/SC	HVAEP1-G001607
1.82227	0.809	0.036	0	En_BodyCol/SC	HVAEP1-G004140
1.81923	0.944	0.236	0	En_BodyCol/SC	HVAEP1-G027303
1.80641	0.974	0.418	0	En_BodyCol/SC	HVAEP1-G007977
1.80245	0.925	0.18	0	En_BodyCol/SC	HVAEP1-G019611
1.78115	0.861	0.105	0	En_BodyCol/SC	HVAEP1-G017301
1.77925	0.897	0.103	0	En_BodyCol/SC	HVAEP1-G014661
1.77065	0.938	0.288	0	En_BodyCol/SC	HVAEP1-G007207
1.75691	0.915	0.118	0	En_BodyCol/SC	HVAEP1-G007952
1.75382	0.886	0.118	0	En_BodyCol/SC	HVAEP1-G014559
1.74461	0.941	0.235	0	En_BodyCol/SC	HVAEP1-G005629
1.72294	0.656	0.015	0	En_BodyCol/SC	HVAEP1-G016001
1.71244	0.798	0.147	0	En_BodyCol/SC	HVAEP1-G026019
1.70868	0.922	0.184	0	En_BodyCol/SC	HVAEP1-G007587
1.70518	0.854	0.117	0	En_BodyCol/SC	HVAEP1-G001974
1.69922	0.98	0.448	0	En_BodyCol/SC	HVAEP1-G009346
1.65707	0.845	0.107	0	En_BodyCol/SC	HVAEP1-G019186
1.64332	0.692	0.084	0	En_BodyCol/SC	HVAEP1-G020051
1.60935	0.923	0.221	0	En_BodyCol/SC	HVAEP1-G025498
1.59275	0.984	0.569	0	En_BodyCol/SC	HVAEP1-G015835
1.57572	0.869	0.106	0	En_BodyCol/SC	HVAEP1-G008611
1.55082	0.978	0.377	0	En_BodyCol/SC	HVAEP1-G024760
1.54794	0.761	0.092	0	En_BodyCol/SC	HVAEP1-G018221
1.5413	0.679	0.041	0	En_BodyCol/SC	HVAEP1-G026275
1.53764	0.959	0.426	0	En_BodyCol/SC	HVAEP1-G022159
1.50501	0.83	0.074	0	En_BodyCol/SC	HVAEP1-G016815
1.49711	0.956	0.593	0	En_BodyCol/SC	HVAEP1-G016277
1.49126	0.95	0.266	0	En_BodyCol/SC	HVAEP1-G020684
1.4632	0.913	0.211	0	En_BodyCol/SC	HVAEP1-G008374
1.45995	0.632	0.037	0	En_BodyCol/SC	HVAEP1-G007234
1.45476	0.787	0.077	0	En_BodyCol/SC	HVAEP1-G000338
1.45048	0.818	0.189	0	En_BodyCol/SC	HVAEP1-G013087
1.43305	0.829	0.172	0	En_BodyCol/SC	HVAEP1-G007044
1.42905	0.94	0.28	0	En_BodyCol/SC	HVAEP1-G005954
1.42309	0.797	0.075	0	En_BodyCol/SC	HVAEP1-G000386
1.41419	0.927	0.182	0	En_BodyCol/SC	HVAEP1-G007950
1.40176	0.781	0.132	0	En_BodyCol/SC	HVAEP1-G001280
1.40135	0.825	0.154	0	En_BodyCol/SC	HVAEP1-G007705
1.36259	0.805	0.082	0	En_BodyCol/SC	HVAEP1-G011837
1.35536	0.9	0.201	0	En_BodyCol/SC	HVAEP1-G020801
1.35025	0.742	0.104	0	En_BodyCol/SC	HVAEP1-G017349
1.34038	0.774	0.101	0	En_BodyCol/SC	HVAEP1-G016918
1.33775	0.911	0.43	0	En_BodyCol/SC	HVAEP1-G003775
1.32173	0.792	0.103	0	En_BodyCol/SC	HVAEP1-G006134
1.30397	0.712	0.075	0	En_BodyCol/SC	HVAEP1-G005442
1.2991	0.874	0.318	0	En_BodyCol/SC	HVAEP1-G026986
1.2983	0.773	0.129	0	En_BodyCol/SC	HVAEP1-G010968
1.28652	0.819	0.158	0	En_BodyCol/SC	HVAEP1-G019536
1.27113	0.73	0.09	0	En_BodyCol/SC	HVAEP1-G022259
1.27054	0.765	0.104	0	En_BodyCol/SC	HVAEP1-G025892
1.25456	0.765	0.105	0	En_BodyCol/SC	HVAEP1-G006689
1.248	0.905	0.301	0	En_BodyCol/SC	HVAEP1-G005222
1.24686	0.98	0.635	0	En_BodyCol/SC	HVAEP1-G011727
1.24474	0.76	0.224	0	En_BodyCol/SC	HVAEP1-G018540
1.23864	0.992	0.641	0	En_BodyCol/SC	HVAEP1-G021685
1.23182	0.64	0.084	0	En_BodyCol/SC	HVAEP1-G016849
1.22444	0.716	0.065	0	En_BodyCol/SC	HVAEP1-G023485
1.21288	0.789	0.159	0	En_BodyCol/SC	HVAEP1-G013281
1.20484	0.812	0.112	0	En_BodyCol/SC	HVAEP1-G022973
1.19294	0.757	0.218	0	En_BodyCol/SC	HVAEP1-G027646
1.18848	0.725	0.075	0	En_BodyCol/SC	HVAEP1-G026248
1.18726	0.716	0.09	0	En_BodyCol/SC	HVAEP1-G023541
1.18488	0.906	0.259	0	En_BodyCol/SC	HVAEP1-G022985
1.18394	0.782	0.141	0	En_BodyCol/SC	HVAEP1-G002058
1.18171	0.745	0.391	0	En_BodyCol/SC	HVAEP1-G015766
1.178	0.784	0.189	0	En_BodyCol/SC	HVAEP1-G007781
1.17675	0.718	0.083	0	En_BodyCol/SC	HVAEP1-G022608
1.17253	0.7	0.039	0	En_BodyCol/SC	HVAEP1-G027365
1.17251	0.748	0.161	0	En_BodyCol/SC	HVAEP1-G021972
1.17126	0.809	0.205	0	En_BodyCol/SC	HVAEP1-G008357
1.16654	0.695	0.1	0	En_BodyCol/SC	HVAEP1-G005823
1.16084	0.642	0.085	0	En_BodyCol/SC	HVAEP1-G019975
1.1604	0.734	0.122	0	En_BodyCol/SC	HVAEP1-G000647
1.15057	0.678	0.059	0	En_BodyCol/SC	HVAEP1-G013836
1.14236	0.767	0.105	0	En_BodyCol/SC	HVAEP1-G019438
1.14214	0.797	0.378	0	En_BodyCol/SC	HVAEP1-G005343
1.14144	0.482	0.02	0	En_BodyCol/SC	HVAEP1-G018225
1.13962	0.68	0.191	0	En_BodyCol/SC	HVAEP1-G022877
1.13946	0.61	0.074	0	En_BodyCol/SC	HVAEP1-G028558
1.13854	0.656	0.063	0	En_BodyCol/SC	HVAEP1-G025826
1.1312	0.736	0.073	0	En_BodyCol/SC	HVAEP1-G000392
1.11922	0.923	0.415	0	En_BodyCol/SC	HVAEP1-G027364
1.11832	0.755	0.132	0	En_BodyCol/SC	HVAEP1-G024951
1.11444	0.825	0.161	0	En_BodyCol/SC	HVAEP1-G000761
1.11218	0.789	0.116	0	En_BodyCol/SC	HVAEP1-G002116
1.09893	0.649	0.072	0	En_BodyCol/SC	HVAEP1-G000591
1.09885	0.734	0.087	0	En_BodyCol/SC	HVAEP1-G028170
1.09559	0.732	0.155	0	En_BodyCol/SC	HVAEP1-G002662
1.09233	0.569	0.022	0	En_BodyCol/SC	HVAEP1-G002114
1.08685	0.751	0.08	0	En_BodyCol/SC	HVAEP1-G023516
1.08409	0.714	0.063	0	En_BodyCol/SC	HVAEP1-G011419
1.08103	0.717	0.155	0	En_BodyCol/SC	HVAEP1-G011695
1.06725	0.373	0.024	0	En_BodyCol/SC	HVAEP1-G027988
1.06599	0.584	0.103	0	En_BodyCol/SC	HVAEP1-G006127
1.05204	0.669	0.127	0	En_BodyCol/SC	HVAEP1-G007142
1.05198	0.844	0.285	0	En_BodyCol/SC	HVAEP1-G021789
1.04731	0.59	0.13	0	En_BodyCol/SC	HVAEP1-G009292
1.04545	0.55	0.057	0	En_BodyCol/SC	HVAEP1-G006280
1.03731	0.733	0.115	0	En_BodyCol/SC	HVAEP1-G028679
1.0368	0.642	0.081	0	En_BodyCol/SC	HVAEP1-G018163
1.03355	0.666	0.111	0	En_BodyCol/SC	HVAEP1-G011994
1.03294	0.617	0.074	0	En_BodyCol/SC	HVAEP1-G013033
1.03128	0.665	0.06	0	En_BodyCol/SC	HVAEP1-G012203
1.02471	0.992	0.686	0	En_BodyCol/SC	HVAEP1-G006416
1.02343	0.801	0.254	0	En_BodyCol/SC	HVAEP1-G005335
1.02268	0.641	0.048	0	En_BodyCol/SC	HVAEP1-G015055
1.02086	0.645	0.065	0	En_BodyCol/SC	HVAEP1-G004396
1.0167	0.996	0.685	0	En_BodyCol/SC	HVAEP1-G023161
1.00919	0.818	0.149	0	En_BodyCol/SC	HVAEP1-G020311
1.00683	0.753	0.131	0	En_BodyCol/SC	HVAEP1-G009293
1.00669	0.67	0.083	0	En_BodyCol/SC	HVAEP1-G026211
3.57657	0.86	0.055	0	En_Foot	HVAEP1-G004354
2.71158	0.993	0.36	0	En_Foot	HVAEP1-G013547
2.57877	0.998	0.342	0	En_Foot	HVAEP1-G020684
2.48729	1	0.709	0	En_Foot	HVAEP1-G009435
2.47648	0.97	0.314	0	En_Foot	HVAEP1-G005629
2.40053	0.974	0.299	0	En_Foot	HVAEP1-G025498
2.32668	0.973	0.266	0	En_Foot	HVAEP1-G007587
2.29734	1	0.595	0	En_Foot	HVAEP1-G024923
2.23149	0.888	0.19	0	En_Foot	HVAEP1-G017301
2.23134	0.914	0.151	0	En_Foot	HVAEP1-G023516
2.23119	0.929	0.28	0	En_Foot	HVAEP1-G020801
2.2024	0.998	0.508	0	En_Foot	HVAEP1-G009346
2.16745	0.934	0.221	0	En_Foot	HVAEP1-G020311
2.16129	0.822	0.136	0	En_Foot	HVAEP1-G027672
2.11864	0.999	0.423	0	En_Foot	HVAEP1-G019607
2.07128	0.998	0.412	0	En_Foot	HVAEP1-G009433
2.0513	1	0.635	0	En_Foot	HVAEP1-G005167
2.01335	0.953	0.266	0	En_Foot	HVAEP1-G007950
2.00642	0.962	0.294	0	En_Foot	HVAEP1-G020294
1.9734	0.993	0.383	0	En_Foot	HVAEP1-G004160
1.96829	0.996	0.38	0	En_Foot	HVAEP1-G001607
1.95753	0.947	0.358	0	En_Foot	HVAEP1-G024519
1.94102	1	0.461	0	En_Foot	HVAEP1-G027231
1.90879	0.999	0.541	0	En_Foot	HVAEP1-G006331
1.89345	0.943	0.233	0	En_Foot	HVAEP1-G000761
1.88845	0.994	0.616	0	En_Foot	HVAEP1-G015835
1.86829	0.909	0.253	0	En_Foot	HVAEP1-G005336
1.86214	0.994	0.39	0	En_Foot	HVAEP1-G001637
1.83798	0.892	0.193	0	En_Foot	HVAEP1-G020291
1.82041	0.805	0.068	0	En_Foot	HVAEP1-G017018
1.81874	0.992	0.438	0	En_Foot	HVAEP1-G009436
1.80801	0.923	0.208	0	En_Foot	HVAEP1-G007952
1.79863	0.964	0.399	0	En_Foot	HVAEP1-G007808
1.78611	0.7	0.056	0	En_Foot	HVAEP1-G015707
1.78132	0.812	0.084	0	En_Foot	HVAEP1-G014180
1.76555	0.801	0.13	0	En_Foot	HVAEP1-G013033
1.73475	0.984	0.358	0	En_Foot	HVAEP1-G007132
1.73293	0.999	0.473	0	En_Foot	HVAEP1-G023243
1.73082	0.972	0.4	0	En_Foot	HVAEP1-G006793
1.72672	1	0.539	0	En_Foot	HVAEP1-G011731
1.71607	0.666	0.035	0	En_Foot	HVAEP1-G019984
1.69268	0.963	0.331	0	En_Foot	HVAEP1-G022985
1.65872	0.922	0.31	0	En_Foot	HVAEP1-G001579
1.6327	0.899	0.37	0	En_Foot	HVAEP1-G005222
1.62556	0.791	0.105	0	En_Foot	HVAEP1-G004474
1.62402	0.932	0.316	0	En_Foot	HVAEP1-G027303
1.62197	0.994	0.525	0	En_Foot	HVAEP1-G001578
1.59816	0.721	0.12	0	En_Foot	HVAEP1-G018549
1.58989	0.989	0.681	0	En_Foot	HVAEP1-G021685
1.58603	0.817	0.161	0	En_Foot	HVAEP1-G016815
1.56207	0.948	0.289	0	En_Foot	HVAEP1-G001235
1.55531	0.736	0.044	0	En_Foot	HVAEP1-G010926
1.55372	0.984	0.39	0	En_Foot	HVAEP1-G023860
1.52769	0.985	0.312	0	En_Foot	HVAEP1-G023175
1.52237	0.877	0.258	0	En_Foot	HVAEP1-G013087
1.52159	0.947	0.289	0	En_Foot	HVAEP1-G008374
1.51161	0.952	0.264	0	En_Foot	HVAEP1-G019611
1.47967	0.772	0.137	0	En_Foot	HVAEP1-G027637
1.45437	0.887	0.216	0	En_Foot	HVAEP1-G002119
1.452	0.886	0.275	0	En_Foot	HVAEP1-G027646
1.43679	0.571	0.005	0	En_Foot	HVAEP1-G010923
1.40141	0.776	0.134	0	En_Foot	HVAEP1-G012636
1.39932	0.817	0.178	0	En_Foot	HVAEP1-G006689
1.39617	0.953	0.361	0	En_Foot	HVAEP1-G007207
1.39166	0.884	0.306	0	En_Foot	HVAEP1-G016006
1.39031	0.919	0.202	0	En_Foot	HVAEP1-G006693
1.38941	0.737	0.141	0	En_Foot	HVAEP1-G021853
1.38132	0.787	0.202	0	En_Foot	HVAEP1-G001163
1.37557	0.759	0.124	0	En_Foot	HVAEP1-G009251
1.36019	0.936	0.286	0	En_Foot	HVAEP1-G008367
1.35835	0.963	0.487	0	En_Foot	HVAEP1-G022159
1.34275	0.755	0.186	0	En_Foot	HVAEP1-G007142
1.34251	0.653	0.036	0	En_Foot	HVAEP1-G023514
1.34232	0.746	0.19	0	En_Foot	HVAEP1-G016332
1.34095	0.831	0.195	0	En_Foot	HVAEP1-G014661
1.34085	0.948	0.425	0	En_Foot	HVAEP1-G007978
1.33813	0.936	0.356	0	En_Foot	HVAEP1-G005954
1.31644	0.527	0.05	0	En_Foot	HVAEP1-G003966
1.30308	0.961	0.335	0	En_Foot	HVAEP1-G007134
1.30053	0.736	0.13	0	En_Foot	HVAEP1-G002498
1.29628	0.638	0.05	0	En_Foot	HVAEP1-G024931
1.28096	0.905	0.277	0	En_Foot	HVAEP1-G009552
1.27796	0.733	0.168	0	En_Foot	HVAEP1-G018221
1.24311	0.563	0.056	0	En_Foot	HVAEP1-G010925
1.23955	0.594	0.06	0	En_Foot	HVAEP1-G012666
1.23411	0.783	0.19	0	En_Foot	HVAEP1-G000647
1.21786	0.607	0.1	0	En_Foot	HVAEP1-G014645
1.21037	0.702	0.193	0	En_Foot	HVAEP1-G018081
1.18545	0.685	0.178	0	En_Foot	HVAEP1-G017349
1.17905	0.795	0.195	0	En_Foot	HVAEP1-G008611
1.17388	0.701	0.132	0	En_Foot	HVAEP1-G000752
1.16235	0.8	0.221	0	En_Foot	HVAEP1-G026019
1.14811	0.664	0.085	0	En_Foot	HVAEP1-G012638
1.14428	0.639	0.115	0	En_Foot	HVAEP1-G026275
1.14128	0.801	0.181	0	En_Foot	HVAEP1-G006134
1.11274	0.728	0.203	0	En_Foot	HVAEP1-G009293
1.1093	0.742	0.194	0	En_Foot	HVAEP1-G019186
1.10434	0.755	0.178	0	En_Foot	HVAEP1-G016918
1.08829	0.273	0.005	0	En_Foot	HVAEP1-G017430
1.07938	0.525	0.002	0	En_Foot	HVAEP1-G026191
1.07148	0.694	0.147	0	En_Foot	HVAEP1-G011260
1.06896	0.814	0.208	0	En_Foot	HVAEP1-G014559
1.06304	0.693	0.16	0	En_Foot	HVAEP1-G000386
1.05006	0.601	0.097	0	En_Foot	HVAEP1-G018942
1.04473	0.673	0.195	0	En_Foot	HVAEP1-G004838
1.03094	0.746	0.203	0	En_Foot	HVAEP1-G010968
1.01685	0.53	0.061	0	En_Foot	HVAEP1-G023742
1.01006	0.71	0.155	0	En_Foot	HVAEP1-G022608
1.00044	0.785	0.192	0	En_Foot	HVAEP1-G022973
1.48269	0.877	0.319	1.81273e-299	En_Foot	HVAEP1-G009438
1.19006	0.959	0.481	3.46931e-289	En_Foot	HVAEP1-G007977
1.32224	0.707	0.232	4.27079e-288	En_Foot	HVAEP1-G004371
1.47891	0.996	0.721	1.32553e-281	En_Foot	HVAEP1-G006416
1.23503	0.928	0.484	1.48982e-266	En_Foot	HVAEP1-G003775
1.28894	0.692	0.209	1.45051e-261	En_Foot	HVAEP1-G002112
1.14885	0.992	0.697	7.96627e-254	En_Foot	HVAEP1-G020871
1.18883	0.806	0.284	2.94573e-253	En_Foot	HVAEP1-G019185
1.04619	0.847	0.314	1.56525e-245	En_Foot	HVAEP1-G011697
1.29111	0.997	0.827	8.32533e-244	En_Foot	HVAEP1-G021299
1.12541	0.861	0.427	4.11574e-239	En_Foot	HVAEP1-G019234
1.04699	0.76	0.285	1.58765e-233	En_Foot	HVAEP1-G018540
1.34389	0.877	0.427	5.18469e-232	En_Foot	HVAEP1-G015766
1.02454	0.938	0.546	5.99009e-222	En_Foot	HVAEP1-G010311
1.1515	0.992	0.764	7.09914e-217	En_Foot	HVAEP1-G013863
1.08682	0.999	0.838	3.80726e-215	En_Foot	HVAEP1-G017800
1.57819	0.552	0.16	4.47199e-214	En_Foot	HVAEP1-G009439
1.00011	0.919	0.471	3.68581e-208	En_Foot	HVAEP1-G007807
1.0257	0.862	0.436	5.56615e-181	En_Foot	HVAEP1-G017048
3.02064	0.283	0.023	0	En_Head	HVAEP1-G026174
2.75154	0.999	0.305	0	En_Head	HVAEP1-G023175
2.5509	0.997	0.584	0	En_Head	HVAEP1-G006657
2.52238	0.99	0.375	0	En_Head	HVAEP1-G001607
2.44507	0.99	0.324	0	En_Head	HVAEP1-G022985
2.42531	0.985	0.434	0	En_Head	HVAEP1-G009436
2.36949	0.998	0.456	0	En_Head	HVAEP1-G027231
2.35211	0.387	0.04	0	En_Head	HVAEP1-G027403
2.34716	0.998	0.418	0	En_Head	HVAEP1-G019607
2.32832	0.971	0.408	0	En_Head	HVAEP1-G009433
2.26746	0.997	0.521	0	En_Head	HVAEP1-G001578
2.26339	1	0.468	0	En_Head	HVAEP1-G023243
2.21768	0.989	0.328	0	En_Head	HVAEP1-G007134
2.16636	1	0.534	0	En_Head	HVAEP1-G011731
2.1663	0.611	0.178	0	En_Head	HVAEP1-G009292
2.15674	0.953	0.249	0	En_Head	HVAEP1-G013087
2.11801	1	0.706	0	En_Head	HVAEP1-G009435
2.02373	0.997	0.537	0	En_Head	HVAEP1-G006331
1.98997	0.845	0.142	0	En_Head	HVAEP1-G020051
1.9859	0.864	0.15	0	En_Head	HVAEP1-G023541
1.96255	0.794	0.119	0	En_Head	HVAEP1-G019224
1.95699	0.987	0.303	0	En_Head	HVAEP1-G011697
1.94983	1	0.592	0	En_Head	HVAEP1-G024923
1.90674	0.983	0.279	0	En_Head	HVAEP1-G008367
1.87526	0.987	0.393	0	En_Head	HVAEP1-G007808
1.8714	0.855	0.119	0	En_Head	HVAEP1-G025357
1.86322	0.392	0.036	0	En_Head	HVAEP1-G023882
1.82723	0.96	0.356	0	En_Head	HVAEP1-G007207
1.79749	0.975	0.257	0	En_Head	HVAEP1-G019611
1.79734	0.45	0.032	0	En_Head	HVAEP1-G019995
1.79273	0.974	0.288	0	En_Head	HVAEP1-G020294
1.78643	0.937	0.18	0	En_Head	HVAEP1-G022973
1.78504	0.355	0.023	0	En_Head	HVAEP1-G013209
1.76597	0.987	0.419	0	En_Head	HVAEP1-G007978
1.75856	0.985	0.385	0	En_Head	HVAEP1-G023860
1.6745	0.735	0.132	0	En_Head	HVAEP1-G027637
1.67091	0.418	0.025	0	En_Head	HVAEP1-G024863
1.61137	0.927	0.227	0	En_Head	HVAEP1-G000761
1.57823	0.991	0.476	0	En_Head	HVAEP1-G007977
1.5689	0.898	0.422	0	En_Head	HVAEP1-G015766
1.56252	0.751	0.07	0	En_Head	HVAEP1-G018688
1.55881	0.872	0.184	0	En_Head	HVAEP1-G019186
1.55819	0.999	0.67	0	En_Head	HVAEP1-G011727
1.55241	0.958	0.479	0	En_Head	HVAEP1-G003775
1.53433	0.965	0.349	0	En_Head	HVAEP1-G005954
1.52116	0.853	0.278	0	En_Head	HVAEP1-G019185
1.50037	0.753	0.189	0	En_Head	HVAEP1-G017301
1.48817	0.598	0.067	0	En_Head	HVAEP1-G018114
1.48262	0.88	0.272	0	En_Head	HVAEP1-G009552
1.46093	0.83	0.13	0	En_Head	HVAEP1-G007424
1.46013	0.137	0.007	0	En_Head	HVAEP1-G011290
1.45648	0.89	0.388	0	En_Head	HVAEP1-G007594
1.45273	0.9	0.216	0	En_Head	HVAEP1-G009288
1.45068	0.858	0.213	0	En_Head	HVAEP1-G026019
1.45032	0.964	0.283	0	En_Head	HVAEP1-G008374
1.44585	0.901	0.285	0	En_Head	HVAEP1-G001235
1.43911	0.978	0.555	0	En_Head	HVAEP1-G010998
1.43505	0.944	0.31	0	En_Head	HVAEP1-G027303
1.43418	0.864	0.184	0	En_Head	HVAEP1-G002116
1.43171	0.874	0.2	0	En_Head	HVAEP1-G014559
1.4292	0.727	0.198	0	En_Head	HVAEP1-G009293
1.42235	0.816	0.158	0	En_Head	HVAEP1-G005823
1.3965	0.997	0.718	0	En_Head	HVAEP1-G023161
1.39267	0.66	0.094	0	En_Head	HVAEP1-G026784
1.38888	0.985	0.385	0	En_Head	HVAEP1-G001637
1.38401	0.873	0.314	0	En_Head	HVAEP1-G009438
1.37481	0.746	0.124	0	En_Head	HVAEP1-G002498
1.37478	0.739	0.094	0	En_Head	HVAEP1-G001533
1.3698	0.97	0.482	0	En_Head	HVAEP1-G022159
1.3665	0.925	0.261	0	En_Head	HVAEP1-G007950
1.36119	0.776	0.113	0	En_Head	HVAEP1-G023353
1.35922	0.705	0.139	0	En_Head	HVAEP1-G004155
1.35228	0.871	0.173	0	En_Head	HVAEP1-G006134
1.33506	0.501	0.106	0	En_Head	HVAEP1-G009290
1.31854	0.852	0.273	0	En_Head	HVAEP1-G022234
1.30778	0.977	0.353	0	En_Head	HVAEP1-G007132
1.30752	0.704	0.181	0	En_Head	HVAEP1-G017760
1.30509	0.87	0.309	0	En_Head	HVAEP1-G005335
1.30495	0.897	0.203	0	En_Head	HVAEP1-G007952
1.30238	0.674	0.034	0	En_Head	HVAEP1-G012675
1.28896	0.979	0.504	0	En_Head	HVAEP1-G009346
1.2851	0.875	0.187	0	En_Head	HVAEP1-G008611
1.27956	0.995	0.718	0	En_Head	HVAEP1-G006416
1.27504	0.821	0.177	0	En_Head	HVAEP1-G011729
1.26855	0.803	0.19	0	En_Head	HVAEP1-G014661
1.26729	0.73	0.176	0	En_Head	HVAEP1-G006689
1.26278	0.953	0.395	0	En_Head	HVAEP1-G006793
1.26011	0.853	0.264	0	En_Head	HVAEP1-G024201
1.25061	0.676	0.066	0	En_Head	HVAEP1-G026501
1.24521	0.711	0.095	0	En_Head	HVAEP1-G007531
1.244	0.794	0.184	0	En_Head	HVAEP1-G000647
1.22422	0.749	0.173	0	En_Head	HVAEP1-G003883
1.20999	0.963	0.355	0	En_Head	HVAEP1-G013547
1.20313	0.772	0.188	0	En_Head	HVAEP1-G007249
1.20252	0.99	0.678	0	En_Head	HVAEP1-G021685
1.19566	0.811	0.225	0	En_Head	HVAEP1-G007705
1.18596	0.761	0.213	0	En_Head	HVAEP1-G011695
1.18412	0.537	0.086	0	En_Head	HVAEP1-G022756
1.16043	0.778	0.141	0	En_Head	HVAEP1-G026248
1.1457	0.809	0.171	0	En_Head	HVAEP1-G016918
1.13328	0.904	0.381	0	En_Head	HVAEP1-G004160
1.13108	0.842	0.212	0	En_Head	HVAEP1-G002119
1.12776	0.741	0.142	0	En_Head	HVAEP1-G026211
1.11956	0.664	0.126	0	En_Head	HVAEP1-G013173
1.10971	0.828	0.195	0	En_Head	HVAEP1-G001974
1.109	0.994	0.694	0	En_Head	HVAEP1-G020871
1.10442	0.783	0.226	0	En_Head	HVAEP1-G019162
1.10353	0.781	0.201	0	En_Head	HVAEP1-G001280
1.10266	0.665	0.138	0	En_Head	HVAEP1-G028338
1.09446	0.677	0.111	0	En_Head	HVAEP1-G014376
1.09177	0.416	0.058	0	En_Head	HVAEP1-G010925
1.08828	0.72	0.141	0	En_Head	HVAEP1-G011260
1.08153	0.879	0.372	0	En_Head	HVAEP1-G010043
1.08099	0.777	0.174	0	En_Head	HVAEP1-G019438
1.07563	0.801	0.228	0	En_Head	HVAEP1-G019536
1.06995	0.791	0.196	0	En_Head	HVAEP1-G024951
1.06723	0.914	0.465	0	En_Head	HVAEP1-G004718
1.06541	0.615	0.11	0	En_Head	HVAEP1-G026456
1.05227	0.745	0.157	0	En_Head	HVAEP1-G022259
1.0521	0.71	0.138	0	En_Head	HVAEP1-G018163
1.05025	0.861	0.377	0	En_Head	HVAEP1-G026986
1.04668	0.712	0.216	0	En_Head	HVAEP1-G006074
1.03371	0.714	0.142	0	En_Head	HVAEP1-G008294
1.0309	0.772	0.173	0	En_Head	HVAEP1-G025892
1.02875	0.639	0.076	0	En_Head	HVAEP1-G024399
1.02728	0.771	0.252	0	En_Head	HVAEP1-G021021
1.02	0.761	0.215	0	En_Head	HVAEP1-G002662
1.0166	0.715	0.189	0	En_Head	HVAEP1-G020889
1.01472	0.327	0.006	0	En_Head	HVAEP1-G011553
1.01351	0.863	0.277	0	En_Head	HVAEP1-G020801
1.00519	0.764	0.178	0	En_Head	HVAEP1-G028679
1.19958	1	0.942	7.82916e-292	En_Head	HVAEP1-G020694
1.13766	0.942	0.55	2.05774e-282	En_Head	HVAEP1-G008331
1.1924	0.813	0.379	1.47753e-260	En_Head	HVAEP1-G005620
1.04103	0.875	0.483	1.25704e-254	En_Head	HVAEP1-G008896
1.32735	0.695	0.28	9.26584e-246	En_Head	HVAEP1-G006641
1.10841	0.734	0.314	8.2285e-231	En_Head	HVAEP1-G007009
1.01609	0.349	0.079	6.04197e-226	En_Head	HVAEP1-G026995
1.03055	0.906	0.467	9.54597e-223	En_Head	HVAEP1-G007807
1.05848	0.745	0.306	1.74373e-219	En_Head	HVAEP1-G016006
1.03147	0.831	0.433	4.30414e-209	En_Head	HVAEP1-G017048
1.15268	0.5	0.213	1.45611e-123	En_Head	HVAEP1-G002112
4.87339	0.992	0.206	0	En_Tentacle	HVAEP1-G006693
4.66566	0.959	0.348	0	En_Tentacle	HVAEP1-G020684
4.41288	0.857	0.031	0	En_Tentacle	HVAEP1-G001808
4.28668	0.867	0.204	0	En_Tentacle	HVAEP1-G009293
4.14808	0.817	0.181	0	En_Tentacle	HVAEP1-G009292
3.93116	0.753	0.019	0	En_Tentacle	HVAEP1-G021697
3.59033	1	0.599	0	En_Tentacle	HVAEP1-G024923
3.29423	0.988	0.638	0	En_Tentacle	HVAEP1-G005167
3.22036	0.899	0.121	0	En_Tentacle	HVAEP1-G018549
3.18788	0.96	0.197	0	En_Tentacle	HVAEP1-G020291
3.17357	0.971	0.284	0	En_Tentacle	HVAEP1-G020801
3.11475	1	0.385	0	En_Tentacle	HVAEP1-G001607
3.10105	0.971	0.227	0	En_Tentacle	HVAEP1-G020311
3.08067	0.732	0.108	0	En_Tentacle	HVAEP1-G009290
2.99342	0.831	0.036	0	En_Tentacle	HVAEP1-G019984
2.94879	0.903	0.011	0	En_Tentacle	HVAEP1-G012637
2.90965	0.998	0.428	0	En_Tentacle	HVAEP1-G019607
2.89551	0.929	0.262	0	En_Tentacle	HVAEP1-G013087
2.87994	0.977	0.238	0	En_Tentacle	HVAEP1-G000761
2.86352	0.98	0.272	0	En_Tentacle	HVAEP1-G007587
2.82141	0.98	0.22	0	En_Tentacle	HVAEP1-G002119
2.7737	0.831	0.073	0	En_Tentacle	HVAEP1-G005481
2.7398	0.985	0.366	0	En_Tentacle	HVAEP1-G007207
2.51951	0.79	0.003	0	En_Tentacle	HVAEP1-G011535
2.50006	0.989	0.294	0	En_Tentacle	HVAEP1-G008374
2.48316	0.986	0.335	0	En_Tentacle	HVAEP1-G022985
2.41573	0.75	0.041	0	En_Tentacle	HVAEP1-G024491
2.37217	0.807	0.038	0	En_Tentacle	HVAEP1-G023514
2.34503	0.715	0.131	0	En_Tentacle	HVAEP1-G010687
2.33792	0.472	0.059	0	En_Tentacle	HVAEP1-G013831
2.22684	0.983	0.395	0	En_Tentacle	HVAEP1-G023860
2.18489	0.98	0.319	0	En_Tentacle	HVAEP1-G005629
2.18255	0.811	0.132	0	En_Tentacle	HVAEP1-G023032
2.15478	0.903	0.229	0	En_Tentacle	HVAEP1-G021972
2.14296	0.854	0.087	0	En_Tentacle	HVAEP1-G023204
2.13996	0.966	0.269	0	En_Tentacle	HVAEP1-G019611
2.1139	0.839	0.061	0	En_Tentacle	HVAEP1-G010089
2.11311	0.848	0.194	0	En_Tentacle	HVAEP1-G000647
2.10614	0.893	0.259	0	En_Tentacle	HVAEP1-G005336
2.10483	0.998	0.477	0	En_Tentacle	HVAEP1-G023243
2.06125	0.775	0.041	0	En_Tentacle	HVAEP1-G009360
2.0308	0.946	0.193	0	En_Tentacle	HVAEP1-G022973
2.00238	0.897	0.205	0	En_Tentacle	HVAEP1-G001974
2.00103	0.887	0.143	0	En_Tentacle	HVAEP1-G021853
1.98934	0.899	0.195	0	En_Tentacle	HVAEP1-G002116
1.97827	0.778	0.111	0	En_Tentacle	HVAEP1-G004474
1.9761	0.75	0.128	0	En_Tentacle	HVAEP1-G003231
1.97521	0.79	0.099	0	En_Tentacle	HVAEP1-G018104
1.95884	0.933	0.272	0	En_Tentacle	HVAEP1-G007950
1.92748	0.821	0.11	0	En_Tentacle	HVAEP1-G022061
1.91668	0.951	0.363	0	En_Tentacle	HVAEP1-G024519
1.885	0.834	0.134	0	En_Tentacle	HVAEP1-G000752
1.87211	0.888	0.282	0	En_Tentacle	HVAEP1-G022234
1.86812	0.989	0.363	0	En_Tentacle	HVAEP1-G007132
1.86518	0.762	0.06	0	En_Tentacle	HVAEP1-G012666
1.83247	0.857	0.163	0	En_Tentacle	HVAEP1-G000795
1.76756	0.834	0.142	0	En_Tentacle	HVAEP1-G007424
1.75365	0.811	0.193	0	En_Tentacle	HVAEP1-G016332
1.74763	0.699	0.067	0	En_Tentacle	HVAEP1-G023071
1.7412	0.615	0.042	0	En_Tentacle	HVAEP1-G013828
1.72827	0.761	0.031	0	En_Tentacle	HVAEP1-G009891
1.71433	0.827	0.272	0	En_Tentacle	HVAEP1-G002052
1.6871	0.724	0.128	0	En_Tentacle	HVAEP1-G005719
1.68364	0.845	0.181	0	En_Tentacle	HVAEP1-G016918
1.65977	0.758	0.014	0	En_Tentacle	HVAEP1-G014812
1.6513	0.538	0.077	0	En_Tentacle	HVAEP1-G006139
1.6439	0.712	0.034	0	En_Tentacle	HVAEP1-G019995
1.63533	0.673	0.032	0	En_Tentacle	HVAEP1-G007273
1.63359	0.759	0.13	0	En_Tentacle	HVAEP1-G009251
1.62557	0.537	0.031	0	En_Tentacle	HVAEP1-G009959
1.6105	0.675	0.067	0	En_Tentacle	HVAEP1-G016364
1.58815	0.762	0.182	0	En_Tentacle	HVAEP1-G018932
1.57888	0.387	0.031	0	En_Tentacle	HVAEP1-G009909
1.53171	0.64	0.055	0	En_Tentacle	HVAEP1-G009355
1.53048	0.678	0.06	0	En_Tentacle	HVAEP1-G027426
1.51731	0.727	0.14	0	En_Tentacle	HVAEP1-G012636
1.4925	0.739	0.142	0	En_Tentacle	HVAEP1-G021883
1.48539	0.647	0.087	0	En_Tentacle	HVAEP1-G008047
1.48038	0.715	0.107	0	En_Tentacle	HVAEP1-G003456
1.46996	0.979	0.318	0	En_Tentacle	HVAEP1-G023175
1.45853	0.73	0.198	0	En_Tentacle	HVAEP1-G004838
1.45043	0.758	0.169	0	En_Tentacle	HVAEP1-G019765
1.44657	0.712	0.084	0	En_Tentacle	HVAEP1-G027359
1.44221	0.669	0.085	0	En_Tentacle	HVAEP1-G017398
1.44151	0.827	0.186	0	En_Tentacle	HVAEP1-G006134
1.43379	0.669	0.121	0	En_Tentacle	HVAEP1-G026700
1.41149	0.704	0.102	0	En_Tentacle	HVAEP1-G022523
1.39539	0.581	0.109	0	En_Tentacle	HVAEP1-G007531
1.38149	0.684	0.119	0	En_Tentacle	HVAEP1-G021934
1.37541	0.489	0.077	0	En_Tentacle	HVAEP1-G008572
1.36275	0.701	0.16	0	En_Tentacle	HVAEP1-G028188
1.33534	0.629	0.135	0	En_Tentacle	HVAEP1-G006453
1.30542	0.589	0.045	0	En_Tentacle	HVAEP1-G024948
1.26126	0.498	0.036	0	En_Tentacle	HVAEP1-G004067
1.25055	0.656	0.108	0	En_Tentacle	HVAEP1-G011823
1.24598	0.58	0.051	0	En_Tentacle	HVAEP1-G011908
1.23562	0.676	0.133	0	En_Tentacle	HVAEP1-G010738
1.22379	0.695	0.154	0	En_Tentacle	HVAEP1-G026211
1.21707	0.603	0.065	0	En_Tentacle	HVAEP1-G015726
1.20386	0.603	0.002	0	En_Tentacle	HVAEP1-G012238
1.19067	0.655	0.087	0	En_Tentacle	HVAEP1-G011366
1.17786	0.621	0.123	0	En_Tentacle	HVAEP1-G024239
1.12028	0.617	0.103	0	En_Tentacle	HVAEP1-G015565
1.11808	0.595	0.053	0	En_Tentacle	HVAEP1-G019780
1.11049	0.564	0.069	0	En_Tentacle	HVAEP1-G019182
1.10049	0.581	0.045	0	En_Tentacle	HVAEP1-G012218
1.09198	0.548	0.041	0	En_Tentacle	HVAEP1-G003907
1.08774	0.61	0.084	0	En_Tentacle	HVAEP1-G023421
1.08712	0.658	0.137	0	En_Tentacle	HVAEP1-G020300
1.07302	0.607	0.124	0	En_Tentacle	HVAEP1-G021525
1.06871	0.581	0.076	0	En_Tentacle	HVAEP1-G019735
1.05618	0.41	0.04	0	En_Tentacle	HVAEP1-G024305
1.05107	0.597	0.09	0	En_Tentacle	HVAEP1-G003974
1.03653	0.502	0.05	0	En_Tentacle	HVAEP1-G001722
1.00501	0.445	0.002	0	En_Tentacle	HVAEP1-G021363
2.09632	0.977	0.389	2.97517e-302	En_Tentacle	HVAEP1-G004160
1.38946	0.732	0.209	1.79971e-297	En_Tentacle	HVAEP1-G012476
1.87187	0.968	0.491	1.20361e-293	En_Tentacle	HVAEP1-G022159
1.57396	0.738	0.208	3.49813e-288	En_Tentacle	HVAEP1-G008474
1.38844	0.926	0.306	1.23444e-284	En_Tentacle	HVAEP1-G025498
1.88871	0.998	0.465	2.244e-282	En_Tentacle	HVAEP1-G027231
1.07995	0.647	0.149	4.81129e-277	En_Tentacle	HVAEP1-G023268
1.19613	0.707	0.199	8.84234e-274	En_Tentacle	HVAEP1-G005183
1.69601	0.965	0.487	1.83855e-272	En_Tentacle	HVAEP1-G003775
1.13003	0.718	0.185	8.64984e-272	En_Tentacle	HVAEP1-G025892
1.50852	0.752	0.198	3.58077e-270	En_Tentacle	HVAEP1-G019186
1.07184	0.724	0.173	8.36925e-270	En_Tentacle	HVAEP1-G018221
1.49706	0.827	0.304	6.51149e-269	En_Tentacle	HVAEP1-G003561
1.20279	0.675	0.163	1.3043e-268	En_Tentacle	HVAEP1-G023516
1.65849	0.992	0.7	6.63537e-266	En_Tentacle	HVAEP1-G020871
1.09177	0.805	0.213	1.60649e-263	En_Tentacle	HVAEP1-G014559
1.07198	0.627	0.159	1.29597e-256	En_Tentacle	HVAEP1-G006846
1.3384	0.863	0.281	7.85135e-256	En_Tentacle	HVAEP1-G027646
1.75097	0.584	0.151	1.1228e-250	En_Tentacle	HVAEP1-G000461
1.3972	0.962	0.43	9.72133e-248	En_Tentacle	HVAEP1-G007978
1.39747	0.794	0.269	2.9496e-246	En_Tentacle	HVAEP1-G001083
1.31804	0.916	0.361	3.67036e-246	En_Tentacle	HVAEP1-G005954
1.56562	0.998	0.829	2.41374e-243	En_Tentacle	HVAEP1-G021299
1.59105	0.936	0.552	9.29793e-243	En_Tentacle	HVAEP1-G024971
1.15321	0.65	0.175	2.16745e-239	En_Tentacle	HVAEP1-G016906
1.36949	0.776	0.281	2.09167e-237	En_Tentacle	HVAEP1-G018228
1.65583	1	0.543	4.13685e-237	En_Tentacle	HVAEP1-G011731
1.15632	0.672	0.194	1.6795e-236	En_Tentacle	HVAEP1-G006232
1.07917	0.784	0.236	2.70885e-236	En_Tentacle	HVAEP1-G007705
1.16621	0.719	0.241	1.01727e-230	En_Tentacle	HVAEP1-G013888
1.36458	0.729	0.235	1.90968e-230	En_Tentacle	HVAEP1-G004371
1.18859	0.686	0.209	1.03112e-229	En_Tentacle	HVAEP1-G023810
1.53956	1	0.545	3.36577e-229	En_Tentacle	HVAEP1-G006331
1.44938	0.989	0.529	3.62812e-217	En_Tentacle	HVAEP1-G001578
1.19461	0.759	0.28	1.01169e-212	En_Tentacle	HVAEP1-G011249
1.11315	0.643	0.186	4.01313e-212	En_Tentacle	HVAEP1-G027636
1.32762	0.65	0.213	6.23141e-212	En_Tentacle	HVAEP1-G004215
1.10727	0.781	0.276	1.24505e-208	En_Tentacle	HVAEP1-G024201
1.15282	0.975	0.418	1.98806e-208	En_Tentacle	HVAEP1-G009433
1.27528	0.952	0.674	1.62376e-204	En_Tentacle	HVAEP1-G004978
1.18236	0.952	0.486	7.26575e-203	En_Tentacle	HVAEP1-G007977
1.28169	0.676	0.224	1.30111e-201	En_Tentacle	HVAEP1-G012304
1.12272	0.975	0.443	2.05287e-195	En_Tentacle	HVAEP1-G009436
1.0926	0.914	0.367	7.03388e-193	En_Tentacle	HVAEP1-G013547
1.00691	0.725	0.227	1.30177e-191	En_Tentacle	HVAEP1-G026019
1.31067	0.802	0.375	6.93982e-190	En_Tentacle	HVAEP1-G007200
1.01641	0.601	0.181	3.19929e-186	En_Tentacle	HVAEP1-G024919
1.14769	0.706	0.269	3.04614e-184	En_Tentacle	HVAEP1-G016797
1.14929	0.952	0.547	7.60597e-171	En_Tentacle	HVAEP1-G009281
1.21938	1	0.943	6.2172e-167	En_Tentacle	HVAEP1-G020694
1.18934	0.988	0.676	2.20365e-165	En_Tentacle	HVAEP1-G011727
1.34611	0.997	0.968	7.65718e-163	En_Tentacle	HVAEP1-G013938
1.20284	0.356	0.076	6.81121e-157	En_Tentacle	HVAEP1-G020007
1.65815	0.934	0.685	5.14088e-155	En_Tentacle	HVAEP1-G021685
1.12382	0.782	0.304	1.9911e-149	En_Tentacle	HVAEP1-G020294
1.00761	0.876	0.509	6.85093e-148	En_Tentacle	HVAEP1-G021516
1.07194	0.995	0.839	2.86551e-147	En_Tentacle	HVAEP1-G017800
1.25434	0.729	0.343	1.12705e-145	En_Tentacle	HVAEP1-G027815
1.36373	0.962	0.766	5.11687e-142	En_Tentacle	HVAEP1-G013863
1.24548	0.799	0.412	1.19519e-138	En_Tentacle	HVAEP1-G027355
1.15028	0.497	0.167	8.42932e-133	En_Tentacle	HVAEP1-G013029
1.05905	0.876	0.585	1.67648e-131	En_Tentacle	HVAEP1-G024910
1.11081	0.805	0.451	5.47907e-122	En_Tentacle	HVAEP1-G010053
1.00726	0.799	0.495	4.94931e-108	En_Tentacle	HVAEP1-G012536
1.12078	0.571	0.224	2.22455e-101	En_Tentacle	HVAEP1-G015718
1.21418	0.474	0.165	1.38332e-96	En_Tentacle	HVAEP1-G009439
1.00969	0.857	0.515	2.51703e-86	En_Tentacle	HVAEP1-G009346
1.09465	0.416	0.15	1.01502e-79	En_Tentacle	HVAEP1-G027637
5.3616	0.891	0.162	0	I_DesmoNB	HVAEP1-G023547
4.77341	0.836	0.03	0	I_DesmoNB	HVAEP1-G006008
4.76618	0.995	0.23	0	I_DesmoNB	HVAEP1-G001584
4.61457	0.85	0.067	0	I_DesmoNB	HVAEP1-G012100
4.18278	0.961	0.164	0	I_DesmoNB	HVAEP1-G019578
4.04844	1	0.244	0	I_DesmoNB	HVAEP1-G019577
3.47482	0.992	0.215	0	I_DesmoNB	HVAEP1-G019588
3.32259	0.992	0.258	0	I_DesmoNB	HVAEP1-G019587
3.19971	0.859	0.106	0	I_DesmoNB	HVAEP1-G025495
3.18837	0.527	0.015	0	I_DesmoNB	HVAEP1-G017622
3.1372	0.849	0.089	0	I_DesmoNB	HVAEP1-G023930
3.03391	0.847	0.081	0	I_DesmoNB	HVAEP1-G022180
2.8322	0.774	0.099	0	I_DesmoNB	HVAEP1-G022046
2.81086	0.8	0.089	0	I_DesmoNB	HVAEP1-G024029
2.70579	0.844	0.11	0	I_DesmoNB	HVAEP1-G003391
2.69444	0.49	0.02	0	I_DesmoNB	HVAEP1-G022050
2.56692	0.711	0.096	0	I_DesmoNB	HVAEP1-G019113
2.56457	0.893	0.087	0	I_DesmoNB	HVAEP1-G010255
2.52196	0.424	0.014	0	I_DesmoNB	HVAEP1-G018507
2.42035	0.442	0.034	0	I_DesmoNB	HVAEP1-G020262
2.41894	0.972	0.109	0	I_DesmoNB	HVAEP1-G023510
2.35664	0.694	0.053	0	I_DesmoNB	HVAEP1-G023601
2.29119	0.529	0.046	0	I_DesmoNB	HVAEP1-G028451
2.28964	0.519	0.039	0	I_DesmoNB	HVAEP1-G003877
2.24276	0.766	0.08	0	I_DesmoNB	HVAEP1-G023924
2.24089	0.717	0.088	0	I_DesmoNB	HVAEP1-G019589
2.23665	0.838	0.097	0	I_DesmoNB	HVAEP1-G006206
2.18694	0.62	0.088	0	I_DesmoNB	HVAEP1-G011565
2.1625	0.448	0.02	0	I_DesmoNB	HVAEP1-G019861
2.15222	0.348	0.013	0	I_DesmoNB	HVAEP1-G005475
2.13459	0.686	0.017	0	I_DesmoNB	HVAEP1-G019428
2.12784	0.656	0.041	0	I_DesmoNB	HVAEP1-G022530
2.12662	0.765	0.095	0	I_DesmoNB	HVAEP1-G021200
2.08064	0.372	0.058	0	I_DesmoNB	HVAEP1-G005004
2.05601	0.7	0.051	0	I_DesmoNB	HVAEP1-G018532
2.04437	0.333	0.03	0	I_DesmoNB	HVAEP1-G020920
2.02982	0.724	0.092	0	I_DesmoNB	HVAEP1-G010597
2.02954	0.781	0.094	0	I_DesmoNB	HVAEP1-G013030
2.02789	0.849	0.105	0	I_DesmoNB	HVAEP1-G007633
2.01778	0.456	0.046	0	I_DesmoNB	HVAEP1-G004253
2.00239	0.731	0.072	0	I_DesmoNB	HVAEP1-G022460
2.0014	0.921	0.164	0	I_DesmoNB	HVAEP1-G004280
1.98944	0.659	0.102	0	I_DesmoNB	HVAEP1-G019445
1.95269	0.411	0.023	0	I_DesmoNB	HVAEP1-G023282
1.86847	0.68	0.051	0	I_DesmoNB	HVAEP1-G008307
1.83666	0.544	0.039	0	I_DesmoNB	HVAEP1-G020771
1.80802	0.746	0.072	0	I_DesmoNB	HVAEP1-G018321
1.78473	0.722	0.073	0	I_DesmoNB	HVAEP1-G022847
1.7762	0.439	0.02	0	I_DesmoNB	HVAEP1-G018336
1.72512	0.385	0.045	0	I_DesmoNB	HVAEP1-G009126
1.70847	0.541	0.05	0	I_DesmoNB	HVAEP1-G021198
1.70009	0.48	0.081	0	I_DesmoNB	HVAEP1-G021718
1.68205	0.601	0.113	0	I_DesmoNB	HVAEP1-G006972
1.65373	0.719	0.075	0	I_DesmoNB	HVAEP1-G004152
1.62968	0.551	0.031	0	I_DesmoNB	HVAEP1-G015243
1.61506	0.683	0.064	0	I_DesmoNB	HVAEP1-G009156
1.60425	0.494	0.028	0	I_DesmoNB	HVAEP1-G011642
1.56797	0.344	0.028	0	I_DesmoNB	HVAEP1-G015934
1.5535	0.443	0.055	0	I_DesmoNB	HVAEP1-G010253
1.52325	0.496	0.067	0	I_DesmoNB	HVAEP1-G010991
1.51562	0.351	0.022	0	I_DesmoNB	HVAEP1-G027734
1.51189	0.793	0.143	0	I_DesmoNB	HVAEP1-G002743
1.49912	0.429	0.031	0	I_DesmoNB	HVAEP1-G021635
1.49547	0.476	0.052	0	I_DesmoNB	HVAEP1-G021814
1.48671	0.395	0.026	0	I_DesmoNB	HVAEP1-G021927
1.47366	0.547	0.051	0	I_DesmoNB	HVAEP1-G023100
1.46932	0.234	0.014	0	I_DesmoNB	HVAEP1-G009932
1.44403	0.535	0.065	0	I_DesmoNB	HVAEP1-G028447
1.44179	0.381	0.032	0	I_DesmoNB	HVAEP1-G005888
1.42981	0.645	0.043	0	I_DesmoNB	HVAEP1-G007063
1.41665	0.552	0.005	0	I_DesmoNB	HVAEP1-G006003
1.37574	0.436	0.108	0	I_DesmoNB	HVAEP1-G004616
1.36355	0.506	0.073	0	I_DesmoNB	HVAEP1-G008432
1.34266	0.547	0.004	0	I_DesmoNB	HVAEP1-G009157
1.32314	0.571	0.063	0	I_DesmoNB	HVAEP1-G003945
1.31727	0.597	0.118	0	I_DesmoNB	HVAEP1-G008423
1.3028	0.453	0.084	0	I_DesmoNB	HVAEP1-G017566
1.2993	0.382	0.066	0	I_DesmoNB	HVAEP1-G023600
1.27035	0.557	0.019	0	I_DesmoNB	HVAEP1-G010088
1.26637	0.612	0.045	0	I_DesmoNB	HVAEP1-G016545
1.23787	0.64	0.101	0	I_DesmoNB	HVAEP1-G017399
1.23595	0.335	0.032	0	I_DesmoNB	HVAEP1-G019967
1.22139	0.392	0.016	0	I_DesmoNB	HVAEP1-G022073
1.21977	0.361	0.015	0	I_DesmoNB	HVAEP1-G021816
1.21321	0.486	0.044	0	I_DesmoNB	HVAEP1-G000994
1.21193	0.362	0.022	0	I_DesmoNB	HVAEP1-G001799
1.21078	0.248	0.019	0	I_DesmoNB	HVAEP1-G027432
1.20613	0.432	0.008	0	I_DesmoNB	HVAEP1-G002481
1.20301	0.419	0.065	0	I_DesmoNB	HVAEP1-G028463
1.19173	0.305	0.022	0	I_DesmoNB	HVAEP1-G018425
1.17659	0.21	0.015	0	I_DesmoNB	HVAEP1-G020926
1.17072	0.605	0.14	0	I_DesmoNB	HVAEP1-G007699
1.16687	0.323	0.029	0	I_DesmoNB	HVAEP1-G015713
1.1602	0.438	0.015	0	I_DesmoNB	HVAEP1-G017831
1.15976	0.404	0.034	0	I_DesmoNB	HVAEP1-G002610
1.14614	0.432	0.043	0	I_DesmoNB	HVAEP1-G001597
1.13058	0.242	0.013	0	I_DesmoNB	HVAEP1-G006120
1.12729	0.372	0.038	0	I_DesmoNB	HVAEP1-G003580
1.12696	0.347	0.023	0	I_DesmoNB	HVAEP1-G012038
1.12034	0.428	0.038	0	I_DesmoNB	HVAEP1-G022880
1.11208	0.405	0.006	0	I_DesmoNB	HVAEP1-G019581
1.0975	0.294	0.018	0	I_DesmoNB	HVAEP1-G004345
1.09572	0.353	0.036	0	I_DesmoNB	HVAEP1-G018874
1.06239	0.507	0.088	0	I_DesmoNB	HVAEP1-G027396
1.05972	0.43	0.057	0	I_DesmoNB	HVAEP1-G022962
1.05823	0.475	0.054	0	I_DesmoNB	HVAEP1-G004203
1.04911	0.397	0.027	0	I_DesmoNB	HVAEP1-G009882
1.04781	0.393	0.045	0	I_DesmoNB	HVAEP1-G028001
1.04088	0.276	0.029	0	I_DesmoNB	HVAEP1-G001614
1.03279	0.26	0.004	0	I_DesmoNB	HVAEP1-G026091
1.01664	0.381	0.028	0	I_DesmoNB	HVAEP1-G011200
1.01207	0.299	0.026	0	I_DesmoNB	HVAEP1-G005557
1.00932	0.395	0.023	0	I_DesmoNB	HVAEP1-G004039
1.00817	0.419	0.065	0	I_DesmoNB	HVAEP1-G012482
1.00435	0.381	0.048	0	I_DesmoNB	HVAEP1-G023637
1.00164	0.333	0.003	0	I_DesmoNB	HVAEP1-G027745
1.02517	0.54	0.182	7.15647e-279	I_DesmoNB	HVAEP1-G009982
1.04153	0.291	0.059	7.7168e-244	I_DesmoNB	HVAEP1-G006755
1.0314	0.286	0.058	3.36155e-242	I_DesmoNB	HVAEP1-G020697
1.00493	0.398	0.116	2.13679e-229	I_DesmoNB	HVAEP1-G010244
1.44431	0.765	0.491	4.38677e-205	I_DesmoNB	HVAEP1-G024625
1.0565	0.738	0.488	1.40912e-189	I_DesmoNB	HVAEP1-G025586
1.04418	0.59	0.289	2.94714e-187	I_DesmoNB	HVAEP1-G004341
1.16895	0.249	0.066	9.52201e-144	I_DesmoNB	HVAEP1-G007744
1.14012	0.24	0.067	7.69836e-125	I_DesmoNB	HVAEP1-G027433
4.78913	0.704	0.08	0	I_DesmoNC	HVAEP1-G028500
4.62304	0.97	0.116	0	I_DesmoNC	HVAEP1-G007752
4.42707	0.95	0.065	0	I_DesmoNC	HVAEP1-G006077
4.41489	0.87	0.043	0	I_DesmoNC	HVAEP1-G026402
4.24681	0.767	0.072	0	I_DesmoNC	HVAEP1-G005256
4.13702	0.932	0.051	0	I_DesmoNC	HVAEP1-G001350
3.89624	0.999	0.403	0	I_DesmoNC	HVAEP1-G008846
3.81741	0.962	0.044	0	I_DesmoNC	HVAEP1-G021294
3.61629	0.649	0.043	0	I_DesmoNC	HVAEP1-G002415
3.51615	0.918	0.066	0	I_DesmoNC	HVAEP1-G006615
3.38083	0.721	0.048	0	I_DesmoNC	HVAEP1-G017147
3.31467	0.796	0.063	0	I_DesmoNC	HVAEP1-G008242
3.23697	0.849	0.077	0	I_DesmoNC	HVAEP1-G014437
3.23655	0.776	0.041	0	I_DesmoNC	HVAEP1-G007991
3.2297	0.52	0.025	0	I_DesmoNC	HVAEP1-G001353
3.18012	0.947	0.496	0	I_DesmoNC	HVAEP1-G028495
3.10126	0.828	0.064	0	I_DesmoNC	HVAEP1-G024789
3.03658	0.994	0.376	0	I_DesmoNC	HVAEP1-G002395
3.01593	0.728	0.023	0	I_DesmoNC	HVAEP1-G005522
2.91828	0.745	0.041	0	I_DesmoNC	HVAEP1-G009326
2.9137	0.75	0.047	0	I_DesmoNC	HVAEP1-G002419
2.80684	0.985	0.415	0	I_DesmoNC	HVAEP1-G028879
2.73426	0.893	0.065	0	I_DesmoNC	HVAEP1-G008022
2.70573	0.862	0.046	0	I_DesmoNC	HVAEP1-G015337
2.5927	0.7	0.064	0	I_DesmoNC	HVAEP1-G017540
2.58183	0.732	0.035	0	I_DesmoNC	HVAEP1-G014995
2.55633	0.631	0.023	0	I_DesmoNC	HVAEP1-G018460
2.54859	0.774	0.25	0	I_DesmoNC	HVAEP1-G023340
2.53469	0.711	0.114	0	I_DesmoNC	HVAEP1-G022930
2.53175	0.473	0.024	0	I_DesmoNC	HVAEP1-G008657
2.513	0.547	0.035	0	I_DesmoNC	HVAEP1-G018215
2.49217	0.728	0.065	0	I_DesmoNC	HVAEP1-G024396
2.48371	0.692	0.033	0	I_DesmoNC	HVAEP1-G025733
2.45952	0.774	0.043	0	I_DesmoNC	HVAEP1-G015830
2.45463	0.896	0.244	0	I_DesmoNC	HVAEP1-G003701
2.44857	1	0.944	0	I_DesmoNC	HVAEP1-G027228
2.381	0.631	0.082	0	I_DesmoNC	HVAEP1-G010276
2.36789	0.793	0.066	0	I_DesmoNC	HVAEP1-G012481
2.27466	0.788	0.065	0	I_DesmoNC	HVAEP1-G009327
2.18303	0.727	0.051	0	I_DesmoNC	HVAEP1-G010765
2.16257	0.722	0.038	0	I_DesmoNC	HVAEP1-G021886
2.12103	0.677	0.019	0	I_DesmoNC	HVAEP1-G005554
2.11332	0.604	0.011	0	I_DesmoNC	HVAEP1-G022531
2.07323	0.738	0.054	0	I_DesmoNC	HVAEP1-G011864
2.04332	0.622	0.015	0	I_DesmoNC	HVAEP1-G023177
2.04292	0.573	0.017	0	I_DesmoNC	HVAEP1-G027702
1.99262	0.6	0.033	0	I_DesmoNC	HVAEP1-G010275
1.95258	0.669	0.039	0	I_DesmoNC	HVAEP1-G011345
1.94509	0.815	0.356	0	I_DesmoNC	HVAEP1-G002078
1.87095	0.761	0.219	0	I_DesmoNC	HVAEP1-G022882
1.8673	0.536	0.018	0	I_DesmoNC	HVAEP1-G010511
1.83384	0.621	0.018	0	I_DesmoNC	HVAEP1-G009330
1.81789	0.574	0.072	0	I_DesmoNC	HVAEP1-G018600
1.80971	0.744	0.124	0	I_DesmoNC	HVAEP1-G007829
1.80792	0.823	0.369	0	I_DesmoNC	HVAEP1-G027422
1.80709	0.535	0.017	0	I_DesmoNC	HVAEP1-G003203
1.77946	0.789	0.388	0	I_DesmoNC	HVAEP1-G027906
1.77222	0.537	0.109	0	I_DesmoNC	HVAEP1-G004576
1.76239	0.679	0.006	0	I_DesmoNC	HVAEP1-G016648
1.75579	0.548	0.082	0	I_DesmoNC	HVAEP1-G008731
1.74747	0.589	0.026	0	I_DesmoNC	HVAEP1-G003411
1.73142	0.719	0.069	0	I_DesmoNC	HVAEP1-G003643
1.72284	0.469	0.019	0	I_DesmoNC	HVAEP1-G023379
1.71726	0.468	0.012	0	I_DesmoNC	HVAEP1-G010210
1.71296	0.689	0.031	0	I_DesmoNC	HVAEP1-G014930
1.64734	0.985	0.767	0	I_DesmoNC	HVAEP1-G007419
1.64	0.662	0.146	0	I_DesmoNC	HVAEP1-G005767
1.61634	0.396	0.036	0	I_DesmoNC	HVAEP1-G027391
1.60611	0.601	0.04	0	I_DesmoNC	HVAEP1-G021728
1.60041	0.596	0.011	0	I_DesmoNC	HVAEP1-G028624
1.59017	0.619	0.025	0	I_DesmoNC	HVAEP1-G016120
1.55753	0.676	0.093	0	I_DesmoNC	HVAEP1-G020356
1.52177	0.623	0.051	0	I_DesmoNC	HVAEP1-G007955
1.51971	0.473	0.014	0	I_DesmoNC	HVAEP1-G005232
1.51699	0.395	0.008	0	I_DesmoNC	HVAEP1-G006877
1.51405	0.405	0.065	0	I_DesmoNC	HVAEP1-G026066
1.48101	0.571	0.064	0	I_DesmoNC	HVAEP1-G004325
1.47991	0.541	0.015	0	I_DesmoNC	HVAEP1-G019067
1.46502	0.592	0.161	0	I_DesmoNC	HVAEP1-G024911
1.45986	0.479	0.017	0	I_DesmoNC	HVAEP1-G007618
1.45778	0.515	0.03	0	I_DesmoNC	HVAEP1-G017088
1.45689	0.507	0.048	0	I_DesmoNC	HVAEP1-G014313
1.44178	0.543	0.016	0	I_DesmoNC	HVAEP1-G023203
1.43415	0.422	0.015	0	I_DesmoNC	HVAEP1-G004475
1.4172	0.522	0.018	0	I_DesmoNC	HVAEP1-G010693
1.4143	0.554	0.058	0	I_DesmoNC	HVAEP1-G011199
1.4094	0.513	0.035	0	I_DesmoNC	HVAEP1-G011348
1.39901	0.613	0.141	0	I_DesmoNC	HVAEP1-G021600
1.39635	0.594	0.087	0	I_DesmoNC	HVAEP1-G023106
1.39214	0.569	0.022	0	I_DesmoNC	HVAEP1-G014870
1.38225	0.416	0.046	0	I_DesmoNC	HVAEP1-G025009
1.38043	0.47	0.035	0	I_DesmoNC	HVAEP1-G028620
1.36348	0.424	0.022	0	I_DesmoNC	HVAEP1-G017908
1.34247	0.509	0.042	0	I_DesmoNC	HVAEP1-G013530
1.32915	0.571	0.041	0	I_DesmoNC	HVAEP1-G013063
1.32581	0.544	0.038	0	I_DesmoNC	HVAEP1-G013027
1.315	0.514	0.009	0	I_DesmoNC	HVAEP1-G021205
1.27837	0.588	0.146	0	I_DesmoNC	HVAEP1-G016738
1.27618	0.536	0.072	0	I_DesmoNC	HVAEP1-G022798
1.26926	0.507	0.068	0	I_DesmoNC	HVAEP1-G011759
1.26898	0.406	0.015	0	I_DesmoNC	HVAEP1-G004154
1.2652	0.385	0.02	0	I_DesmoNC	HVAEP1-G017537
1.26178	0.506	0.012	0	I_DesmoNC	HVAEP1-G011718
1.24536	0.385	0.015	0	I_DesmoNC	HVAEP1-G012217
1.23661	0.407	0.037	0	I_DesmoNC	HVAEP1-G007760
1.23428	0.453	0.011	0	I_DesmoNC	HVAEP1-G010134
1.21887	0.413	0.008	0	I_DesmoNC	HVAEP1-G022409
1.21267	0.52	0.018	0	I_DesmoNC	HVAEP1-G018218
1.20694	0.493	0.024	0	I_DesmoNC	HVAEP1-G006724
1.1975	0.429	0.014	0	I_DesmoNC	HVAEP1-G021609
1.18653	0.545	0.123	0	I_DesmoNC	HVAEP1-G010378
1.17384	0.468	0.033	0	I_DesmoNC	HVAEP1-G015639
1.1651	0.477	0.019	0	I_DesmoNC	HVAEP1-G011377
1.16471	0.547	0.149	0	I_DesmoNC	HVAEP1-G014200
1.15338	0.353	0.032	0	I_DesmoNC	HVAEP1-G010042
1.14115	0.401	0.019	0	I_DesmoNC	HVAEP1-G023724
1.12305	0.457	0.025	0	I_DesmoNC	HVAEP1-G021560
1.12009	0.391	0.03	0	I_DesmoNC	HVAEP1-G016866
1.11813	0.417	0.083	0	I_DesmoNC	HVAEP1-G028289
1.11145	0.421	0.07	0	I_DesmoNC	HVAEP1-G010202
1.10474	0.413	0.023	0	I_DesmoNC	HVAEP1-G004983
1.10299	0.45	0.017	0	I_DesmoNC	HVAEP1-G026224
1.10148	0.429	0.014	0	I_DesmoNC	HVAEP1-G001502
1.10147	0.491	0.058	0	I_DesmoNC	HVAEP1-G027605
1.08738	0.414	0.027	0	I_DesmoNC	HVAEP1-G017090
1.08064	0.43	0.011	0	I_DesmoNC	HVAEP1-G003385
1.07453	0.418	0.009	0	I_DesmoNC	HVAEP1-G014350
1.05795	0.431	0.051	0	I_DesmoNC	HVAEP1-G028315
1.05447	0.441	0.043	0	I_DesmoNC	HVAEP1-G020437
1.03664	0.443	0.057	0	I_DesmoNC	HVAEP1-G012296
1.02433	0.342	0.029	0	I_DesmoNC	HVAEP1-G012643
1.02166	0.407	0.068	0	I_DesmoNC	HVAEP1-G028757
1.01772	0.359	0.015	0	I_DesmoNC	HVAEP1-G007243
1.0063	0.325	0.034	0	I_DesmoNC	HVAEP1-G027541
1.00043	0.413	0.05	0	I_DesmoNC	HVAEP1-G022503
1.66661	0.358	0.062	2.14066e-303	I_DesmoNC	HVAEP1-G027242
1.3105	0.56	0.168	1.15223e-298	I_DesmoNC	HVAEP1-G021214
1.02175	0.506	0.133	8.53067e-295	I_DesmoNC	HVAEP1-G022189
1.66672	0.794	0.408	4.55684e-294	I_DesmoNC	HVAEP1-G023140
1.16373	0.53	0.148	2.32656e-287	I_DesmoNC	HVAEP1-G004537
1.22979	0.609	0.197	1.39971e-285	I_DesmoNC	HVAEP1-G025223
1.92156	0.839	0.492	1.62641e-275	I_DesmoNC	HVAEP1-G005868
1.14993	0.548	0.174	2.03935e-268	I_DesmoNC	HVAEP1-G008590
1.03449	0.339	0.064	1.03323e-256	I_DesmoNC	HVAEP1-G002909
1.10166	0.576	0.198	1.01591e-237	I_DesmoNC	HVAEP1-G011783
1.16415	0.992	0.848	1.04236e-236	I_DesmoNC	HVAEP1-G008884
1.24963	0.988	0.824	7.09518e-227	I_DesmoNC	HVAEP1-G017289
1.17441	0.635	0.264	1.72598e-218	I_DesmoNC	HVAEP1-G022582
1.26772	0.59	0.242	3.08671e-216	I_DesmoNC	HVAEP1-G014438
1.23342	0.676	0.319	9.38155e-214	I_DesmoNC	HVAEP1-G009314
1.47024	0.563	0.233	1.78561e-211	I_DesmoNC	HVAEP1-G019161
1.34462	0.513	0.18	4.86689e-211	I_DesmoNC	HVAEP1-G011733
1.18666	0.588	0.253	5.70261e-206	I_DesmoNC	HVAEP1-G022084
1.11678	0.486	0.158	6.43879e-205	I_DesmoNC	HVAEP1-G023182
1.24935	0.934	0.662	1.26272e-203	I_DesmoNC	HVAEP1-G001603
1.00957	0.466	0.152	4.76221e-201	I_DesmoNC	HVAEP1-G016017
1.04395	0.918	0.6	2.00534e-200	I_DesmoNC	HVAEP1-G014964
1.31611	0.916	0.769	9.94856e-189	I_DesmoNC	HVAEP1-G008337
1.21414	0.712	0.389	2.26592e-178	I_DesmoNC	HVAEP1-G008651
2.54881	0.698	0.411	7.82291e-173	I_DesmoNC	HVAEP1-G027355
1.08119	0.645	0.335	4.42171e-162	I_DesmoNC	HVAEP1-G017280
1.26718	0.664	0.348	1.979e-159	I_DesmoNC	HVAEP1-G013121
1.0833	0.951	0.772	5.81706e-156	I_DesmoNC	HVAEP1-G005908
1.04604	0.688	0.386	5.95208e-156	I_DesmoNC	HVAEP1-G002508
1.08352	0.409	0.17	1.7305e-118	I_DesmoNC	HVAEP1-G017667
1.08549	0.515	0.274	8.38385e-116	I_DesmoNC	HVAEP1-G003822
1.05378	0.428	0.214	4.7073e-94	I_DesmoNC	HVAEP1-G023712
1.17876	0.999	0.968	1.22557e-84	I_DesmoNC	HVAEP1-G013938
1.47945	0.686	0.51	2.6551e-81	I_DesmoNC	HVAEP1-G001117
1.07288	0.712	0.56	4.91126e-77	I_DesmoNC	HVAEP1-G009964
1.30321	0.824	0.697	2.33241e-74	I_DesmoNC	HVAEP1-G011208
1.18452	0.514	0.329	1.42085e-67	I_DesmoNC	HVAEP1-G027731
1.29603	0.745	0.628	8.16128e-51	I_DesmoNC	HVAEP1-G019106
1.32516	0.955	0.802	3.65831e-50	I_DesmoNC	HVAEP1-G004460
1.00191	0.471	0.342	5.5511e-45	I_DesmoNC	HVAEP1-G022213
2.32215	0.999	0.775	0	I_EarlyNem	HVAEP1-G022056
2.11806	0.673	0.174	0	I_EarlyNem	HVAEP1-G001936
1.84842	0.911	0.334	0	I_EarlyNem	HVAEP1-G022797
1.66335	0.898	0.306	0	I_EarlyNem	HVAEP1-G013001
1.62453	0.915	0.255	0	I_EarlyNem	HVAEP1-G001198
1.60196	0.809	0.108	0	I_EarlyNem	HVAEP1-G006103
1.59616	0.908	0.339	0	I_EarlyNem	HVAEP1-G021465
1.55079	0.836	0.127	0	I_EarlyNem	HVAEP1-G007699
1.55066	0.997	0.852	0	I_EarlyNem	HVAEP1-G023650
1.50892	0.938	0.482	0	I_EarlyNem	HVAEP1-G024625
1.4488	0.999	0.905	0	I_EarlyNem	HVAEP1-G017595
1.44542	0.781	0.103	0	I_EarlyNem	HVAEP1-G006972
1.41848	0.806	0.204	0	I_EarlyNem	HVAEP1-G023348
1.40404	0.8	0.184	0	I_EarlyNem	HVAEP1-G017543
1.37011	0.799	0.107	0	I_EarlyNem	HVAEP1-G008423
1.35699	0.845	0.266	0	I_EarlyNem	HVAEP1-G008761
1.27945	1	0.979	0	I_EarlyNem	HVAEP1-G011819
1.21865	0.777	0.249	0	I_EarlyNem	HVAEP1-G016657
1.19996	0.857	0.361	0	I_EarlyNem	HVAEP1-G017606
1.19765	0.926	0.6	0	I_EarlyNem	HVAEP1-G017154
1.14816	0.819	0.346	0	I_EarlyNem	HVAEP1-G001859
1.10156	0.717	0.157	0	I_EarlyNem	HVAEP1-G005514
1.08266	0.945	0.71	0	I_EarlyNem	HVAEP1-G009398
1.07052	0.997	0.889	0	I_EarlyNem	HVAEP1-G007231
1.06811	0.863	0.462	0	I_EarlyNem	HVAEP1-G019432
1.0637	0.979	0.822	0	I_EarlyNem	HVAEP1-G008980
1.06161	0.938	0.718	0	I_EarlyNem	HVAEP1-G007157
1.05897	0.756	0.309	0	I_EarlyNem	HVAEP1-G005473
1.03753	0.655	0.1	0	I_EarlyNem	HVAEP1-G021326
1.02612	0.939	0.709	0	I_EarlyNem	HVAEP1-G001749
1.00591	0.726	0.144	0	I_EarlyNem	HVAEP1-G002743
1.00378	0.746	0.253	0	I_EarlyNem	HVAEP1-G020725
1.00198	0.656	0.098	0	I_EarlyNem	HVAEP1-G017399
1.03424	0.913	0.606	3.37353e-298	I_EarlyNem	HVAEP1-G001606
1.02691	0.918	0.604	6.83267e-292	I_EarlyNem	HVAEP1-G016975
1.02201	0.953	0.769	1.11769e-287	I_EarlyNem	HVAEP1-G023683
1.0901	0.824	0.487	4.72355e-284	I_EarlyNem	HVAEP1-G027909
1.00151	0.638	0.251	1.07204e-245	I_EarlyNem	HVAEP1-G001681
1.06646	0.911	0.713	1.59551e-240	I_EarlyNem	HVAEP1-G006439
5.68434	0.822	0.058	0	I_Ec1/5N	HVAEP1-G016173
5.36512	0.912	0.042	0	I_Ec1/5N	HVAEP1-G016170
4.96908	0.997	0.057	0	I_Ec1/5N	HVAEP1-G021114
4.32334	0.975	0.14	0	I_Ec1/5N	HVAEP1-G009409
4.20585	0.45	0.028	0	I_Ec1/5N	HVAEP1-G023387
3.93149	0.666	0.025	0	I_Ec1/5N	HVAEP1-G016171
3.47285	0.95	0.172	0	I_Ec1/5N	HVAEP1-G021023
3.05372	0.944	0.113	0	I_Ec1/5N	HVAEP1-G026319
2.82502	0.669	0.089	0	I_Ec1/5N	HVAEP1-G011508
2.64777	0.597	0.057	0	I_Ec1/5N	HVAEP1-G012608
2.15432	0.834	0.121	0	I_Ec1/5N	HVAEP1-G019559
2.13332	0.841	0.03	0	I_Ec1/5N	HVAEP1-G026989
2.04076	0.688	0.013	0	I_Ec1/5N	HVAEP1-G025669
1.86059	0.644	0.032	0	I_Ec1/5N	HVAEP1-G021000
1.85673	0.509	0.013	0	I_Ec1/5N	HVAEP1-G025673
1.81469	0.547	0.044	0	I_Ec1/5N	HVAEP1-G017129
1.80563	0.647	0.022	0	I_Ec1/5N	HVAEP1-G025217
1.73738	0.581	0.03	0	I_Ec1/5N	HVAEP1-G006947
1.73582	0.603	0.023	0	I_Ec1/5N	HVAEP1-G012274
1.68333	0.478	0.037	0	I_Ec1/5N	HVAEP1-G020992
1.68201	0.525	0.029	0	I_Ec1/5N	HVAEP1-G007119
1.55962	0.525	0.01	0	I_Ec1/5N	HVAEP1-G025675
1.44369	0.572	0.03	0	I_Ec1/5N	HVAEP1-G021173
1.39705	0.359	0.02	0	I_Ec1/5N	HVAEP1-G015083
1.36927	0.522	0.039	0	I_Ec1/5N	HVAEP1-G025622
1.31111	0.541	0.011	0	I_Ec1/5N	HVAEP1-G018265
1.31022	0.331	0.016	0	I_Ec1/5N	HVAEP1-G026993
1.28429	0.516	0.03	0	I_Ec1/5N	HVAEP1-G026504
1.24563	0.522	0.024	0	I_Ec1/5N	HVAEP1-G023399
1.20037	0.481	0.032	0	I_Ec1/5N	HVAEP1-G020709
1.18381	0.566	0.057	0	I_Ec1/5N	HVAEP1-G019557
1.1835	0.369	0.01	0	I_Ec1/5N	HVAEP1-G004841
1.08851	0.453	0.009	0	I_Ec1/5N	HVAEP1-G025671
1.00404	0.4	0.004	0	I_Ec1/5N	HVAEP1-G009877
1.22802	0.631	0.073	1.15395e-298	I_Ec1/5N	HVAEP1-G005507
1.33625	0.534	0.056	6.00263e-281	I_Ec1/5N	HVAEP1-G022569
1.01003	0.528	0.056	5.94832e-267	I_Ec1/5N	HVAEP1-G020965
1.34791	0.547	0.063	5.68292e-261	I_Ec1/5N	HVAEP1-G017974
1.33811	0.681	0.104	6.29644e-246	I_Ec1/5N	HVAEP1-G023501
1.26979	0.531	0.064	3.18252e-240	I_Ec1/5N	HVAEP1-G005005
1.2284	0.384	0.034	6.33758e-233	I_Ec1/5N	HVAEP1-G015972
1.62789	0.713	0.123	7.45906e-230	I_Ec1/5N	HVAEP1-G010789
2.24645	0.791	0.165	2.2404e-219	I_Ec1/5N	HVAEP1-G028188
2.15171	0.875	0.191	1.49975e-214	I_Ec1/5N	HVAEP1-G019444
1.04294	0.419	0.045	1.04682e-209	I_Ec1/5N	HVAEP1-G009671
1.5051	0.75	0.148	4.10374e-207	I_Ec1/5N	HVAEP1-G019069
1.03521	0.356	0.035	1.26142e-195	I_Ec1/5N	HVAEP1-G014366
1.18652	0.4	0.046	9.0141e-188	I_Ec1/5N	HVAEP1-G012670
1.04067	0.466	0.062	5.56606e-185	I_Ec1/5N	HVAEP1-G025841
1.14492	0.522	0.09	1.49387e-162	I_Ec1/5N	HVAEP1-G001930
1.14698	0.503	0.081	1.44862e-157	I_Ec1/5N	HVAEP1-G012892
1.57849	0.356	0.046	1.12562e-138	I_Ec1/5N	HVAEP1-G017220
1.72468	0.838	0.341	4.63913e-125	I_Ec1/5N	HVAEP1-G022213
2.97798	0.197	0.017	3.03243e-121	I_Ec1/5N	HVAEP1-G016165
1.06307	0.206	0.019	6.49332e-113	I_Ec1/5N	HVAEP1-G012652
1.03179	0.512	0.107	1.19628e-112	I_Ec1/5N	HVAEP1-G013028
1.08793	0.184	0.016	2.3077e-112	I_Ec1/5N	HVAEP1-G004995
1.28193	0.622	0.179	9.23261e-111	I_Ec1/5N	HVAEP1-G024886
1.4168	0.641	0.185	5.88216e-109	I_Ec1/5N	HVAEP1-G008901
1.81285	0.131	0.01	6.10425e-93	I_Ec1/5N	HVAEP1-G003594
1.09038	0.528	0.145	6.85963e-88	I_Ec1/5N	HVAEP1-G008900
1.42547	0.691	0.282	5.8614e-84	I_Ec1/5N	HVAEP1-G024885
1.5381	0.494	0.142	9.91079e-82	I_Ec1/5N	HVAEP1-G014214
3.41182	0.316	0.063	4.47241e-73	I_Ec1/5N	HVAEP1-G017554
1.19545	0.747	0.374	1.29783e-56	I_Ec1/5N	HVAEP1-G003882
1.15403	0.769	0.463	1.45326e-55	I_Ec1/5N	HVAEP1-G024787
1.15685	0.644	0.323	2.23717e-48	I_Ec1/5N	HVAEP1-G004393
1.03126	0.738	0.483	2.92931e-42	I_Ec1/5N	HVAEP1-G023743
2.80767	0.388	0.147	6.66523e-39	I_Ec1/5N	HVAEP1-G017228
1.12134	0.541	0.312	1.61341e-27	I_Ec1/5N	HVAEP1-G001291
1.13495	0.497	0.254	2.96742e-27	I_Ec1/5N	HVAEP1-G011182
1.79163	0.222	0.065	4.30565e-26	I_Ec1/5N	HVAEP1-G022883
1.01479	0.384	0.279	0.000101939	I_Ec1/5N	HVAEP1-G014271
4.43077	0.993	0.053	0	I_Ec1N	HVAEP1-G021114
4.36152	0.769	0.038	0	I_Ec1N	HVAEP1-G017129
3.45453	0.713	0.011	0	I_Ec1N	HVAEP1-G012652
3.24283	0.984	0.115	0	I_Ec1N	HVAEP1-G019559
3.07283	0.698	0.01	0	I_Ec1N	HVAEP1-G016549
2.91358	0.682	0.009	0	I_Ec1N	HVAEP1-G016169
2.88876	0.649	0.022	0	I_Ec1N	HVAEP1-G017140
2.85001	0.953	0.098	0	I_Ec1N	HVAEP1-G013028
2.73652	0.947	0.038	0	I_Ec1N	HVAEP1-G016170
2.62299	0.52	0.025	0	I_Ec1N	HVAEP1-G023387
2.6123	0.707	0.019	0	I_Ec1N	HVAEP1-G012274
2.34093	0.967	0.137	0	I_Ec1N	HVAEP1-G009409
[truncated: 1,582 more rows]

## Sheet: Legend
Supplemental Data S8. List of cell-type-specific markers for the strain AEP H. vulgaris single-cell RNA-seq atlas. Markers were found by comparing single cell transcriptomes of a given cell-type to all other cells in the atlas using a Wilcoxon Rank Sum test as implemented in Seurat. Markers were excluded if the estimated log2 fold-change was less than 1. Cluster names in the ‘Target Cluster’ colu…
