# Supplementary material for: A chromosome-scale epigenetic map of the Hydra genome reveals conserved regulators of cell state
Source: HighWire-hosted journal article supplement (doi:10.1101/gr.277040.122), 2023-01-13
Supplement: Supplemental_Data_S11.xlsx [file Supplemental_Data_S11.xlsx]

## Sheet: Gene Age
Hydra Gene ID	Clade of Origin	Orthofinder Node ID
HVAEP1-G013495	Hydra vulgaris	N36
HVAEP1-G012562	Hydra vulgaris	N36
HVAEP1-G007811	Hydra vulgaris	N36
HVAEP1-G009305	Hydra vulgaris	N36
HVAEP1-G012340	Hydra vulgaris	N36
HVAEP1-G009304	Hydra vulgaris	N36
HVAEP1-G009243	Hydra vulgaris	N36
HVAEP1-G002618	Hydra vulgaris	N36
HVAEP1-G009242	Hydra vulgaris	N36
HVAEP1-G002619	Hydra vulgaris	N36
HVAEP1-G002623	Hydra vulgaris	N36
HVAEP1-G027117	Hydra vulgaris	N36
HVAEP1-G004335	Hydra vulgaris	N36
HVAEP1-G024051	Hydra vulgaris	N36
HVAEP1-G009015	Hydra vulgaris	N36
HVAEP1-G007809	Hydra vulgaris	N36
HVAEP1-G010484	Hydra vulgaris	N36
HVAEP1-G021089	Hydra vulgaris	N36
HVAEP1-G012341	Hydra vulgaris	N36
HVAEP1-G025789	Hydra vulgaris	N36
HVAEP1-G007474	Hydra vulgaris	N36
HVAEP1-G013704	Hydra vulgaris	N36
HVAEP1-G010483	Hydra vulgaris	N36
HVAEP1-G025788	Hydra vulgaris	N36
HVAEP1-G025953	Hydra vulgaris	N36
HVAEP1-G012339	Hydra vulgaris	N36
HVAEP1-G012561	Hydra vulgaris	N36
HVAEP1-G013496	Hydra vulgaris	N36
HVAEP1-G007162	Hydra vulgaris	N36
HVAEP1-G009082	Hydra vulgaris	N36
HVAEP1-G009086	Hydra vulgaris	N36
HVAEP1-G009109	Hydra vulgaris	N36
HVAEP1-G009113	Hydra vulgaris	N36
HVAEP1-G009099	Hydra vulgaris	N36
HVAEP1-G009076	Hydra vulgaris	N36
HVAEP1-G008993	Hydra vulgaris	N36
HVAEP1-G010592	Hydra vulgaris	N36
HVAEP1-G010652	Hydra vulgaris	N36
HVAEP1-G009078	Hydra vulgaris	N36
HVAEP1-G009079	Hydra vulgaris	N36
HVAEP1-G009087	Hydra vulgaris	N36
HVAEP1-G009110	Hydra vulgaris	N36
HVAEP1-G009083	Hydra vulgaris	N36
HVAEP1-G009103	Hydra vulgaris	N36
HVAEP1-G009090	Hydra vulgaris	N36
HVAEP1-G009093	Hydra vulgaris	N36
HVAEP1-G009096	Hydra vulgaris	N36
HVAEP1-G009100	Hydra vulgaris	N36
HVAEP1-G009114	Hydra vulgaris	N36
HVAEP1-G009106	Hydra vulgaris	N36
HVAEP1-G016905	Hydra vulgaris	N36
HVAEP1-G002914	Hydra vulgaris	N36
HVAEP1-G028509	Hydra vulgaris	N36
HVAEP1-G017637	Hydra vulgaris	N36
HVAEP1-G012319	Hydra vulgaris	N36
HVAEP1-G013525	Hydra vulgaris	N36
HVAEP1-G020144	Hydra vulgaris	N36
HVAEP1-G028507	Hydra vulgaris	N36
HVAEP1-G016904	Hydra vulgaris	N36
HVAEP1-G027857	Hydra vulgaris	N36
HVAEP1-G014142	Hydra vulgaris	N36
HVAEP1-G001626	Hydra vulgaris	N36
HVAEP1-G025313	Hydra vulgaris	N36
HVAEP1-G025322	Hydra vulgaris	N36
HVAEP1-G009809	Hydra vulgaris	N36
HVAEP1-G015857	Hydra vulgaris	N36
HVAEP1-G024376	Hydra vulgaris	N36
HVAEP1-G010879	Hydra vulgaris	N36
HVAEP1-G003119	Hydra vulgaris	N36
HVAEP1-G011928	Hydra vulgaris	N36
HVAEP1-G025658	Hydra vulgaris	N36
HVAEP1-G025141	Hydra vulgaris	N36
HVAEP1-G004930	Hydra vulgaris	N36
HVAEP1-G020955	Hydra vulgaris	N36
HVAEP1-G002916	Hydra vulgaris	N36
HVAEP1-G017638	Hydra vulgaris	N36
HVAEP1-G021874	Hydra vulgaris	N36
HVAEP1-G003118	Hydra vulgaris	N36
HVAEP1-G011926	Hydra vulgaris	N36
HVAEP1-G010880	Hydra vulgaris	N36
HVAEP1-G012318	Hydra vulgaris	N36
HVAEP1-G003117	Hydra vulgaris	N36
HVAEP1-G002915	Hydra vulgaris	N36
HVAEP1-G027858	Hydra vulgaris	N36
HVAEP1-G025140	Hydra vulgaris	N36
HVAEP1-G014546	Hydra vulgaris	N36
HVAEP1-G025321	Hydra vulgaris	N36
HVAEP1-G013591	Hydra vulgaris	N36
HVAEP1-G014038	Hydra vulgaris	N36
HVAEP1-G004931	Hydra vulgaris	N36
HVAEP1-G009808	Hydra vulgaris	N36
HVAEP1-G020954	Hydra vulgaris	N36
HVAEP1-G013590	Hydra vulgaris	N36
HVAEP1-G027859	Hydra vulgaris	N36
HVAEP1-G003116	Hydra vulgaris	N36
HVAEP1-G014143	Hydra vulgaris	N36
HVAEP1-G013526	Hydra vulgaris	N36
HVAEP1-G021873	Hydra vulgaris	N36
HVAEP1-G001627	Hydra vulgaris	N36
HVAEP1-G025311	Hydra vulgaris	N36
HVAEP1-G024375	Hydra vulgaris	N36
HVAEP1-G014545	Hydra vulgaris	N36
HVAEP1-G028508	Hydra vulgaris	N36
HVAEP1-G011927	Hydra vulgaris	N36
HVAEP1-G009810	Hydra vulgaris	N36
HVAEP1-G015859	Hydra vulgaris	N36
HVAEP1-G015858	Hydra vulgaris	N36
HVAEP1-G017558	Hydra vulgaris	N36
HVAEP1-G015694	Hydra vulgaris	N36
HVAEP1-G018028	Hydra vulgaris	N36
HVAEP1-G017557	Hydra vulgaris	N36
HVAEP1-G013549	Hydra vulgaris	N36
HVAEP1-G027526	Hydra vulgaris	N36
HVAEP1-G017978	Hydra vulgaris	N36
HVAEP1-G014295	Hydra vulgaris	N36
HVAEP1-G025399	Hydra vulgaris	N36
HVAEP1-G021798	Hydra vulgaris	N36
HVAEP1-G021519	Hydra vulgaris	N36
HVAEP1-G004834	Hydra vulgaris	N36
HVAEP1-G003616	Hydra vulgaris	N36
HVAEP1-G018029	Hydra vulgaris	N36
HVAEP1-G017976	Hydra vulgaris	N36
HVAEP1-G005216	Hydra vulgaris	N36
HVAEP1-G015397	Hydra vulgaris	N36
HVAEP1-G004835	Hydra vulgaris	N36
HVAEP1-G017556	Hydra vulgaris	N36
HVAEP1-G017977	Hydra vulgaris	N36
HVAEP1-G021799	Hydra vulgaris	N36
HVAEP1-G012028	Hydra vulgaris	N36
HVAEP1-G020957	Hydra vulgaris	N36
HVAEP1-G015693	Hydra vulgaris	N36
HVAEP1-G021186	Hydra vulgaris	N36
HVAEP1-G020691	Hydra vulgaris	N36
HVAEP1-G013511	Hydra vulgaris	N36
HVAEP1-G020958	Hydra vulgaris	N36
HVAEP1-G016431	Hydra vulgaris	N36
HVAEP1-G026559	Hydra vulgaris	N36
HVAEP1-G019313	Hydra vulgaris	N36
HVAEP1-G009302	Hydra vulgaris	N36
HVAEP1-G026889	Hydra vulgaris	N36
HVAEP1-G012329	Hydra vulgaris	N36
HVAEP1-G019493	Hydra vulgaris	N36
HVAEP1-G015588	Hydra vulgaris	N36
HVAEP1-G010486	Hydra vulgaris	N36
HVAEP1-G002620	Hydra vulgaris	N36
HVAEP1-G027118	Hydra vulgaris	N36
HVAEP1-G012343	Hydra vulgaris	N36
HVAEP1-G013498	Hydra vulgaris	N36
HVAEP1-G010594	Hydra vulgaris	N36
HVAEP1-G010654	Hydra vulgaris	N36
HVAEP1-G009104	Hydra vulgaris	N36
HVAEP1-G009107	Hydra vulgaris	N36
HVAEP1-G009115	Hydra vulgaris	N36
HVAEP1-G009080	Hydra vulgaris	N36
HVAEP1-G009084	Hydra vulgaris	N36
HVAEP1-G009088	Hydra vulgaris	N36
HVAEP1-G009094	Hydra vulgaris	N36
HVAEP1-G009097	Hydra vulgaris	N36
HVAEP1-G009091	Hydra vulgaris	N36
HVAEP1-G009101	Hydra vulgaris	N36
HVAEP1-G009111	Hydra vulgaris	N36
HVAEP1-G015488	Hydra vulgaris	N36
HVAEP1-G018818	Hydra vulgaris	N36
HVAEP1-G018795	Hydra vulgaris	N36
HVAEP1-G018819	Hydra vulgaris	N36
HVAEP1-G005859	Hydra vulgaris	N36
HVAEP1-G026988	Hydra vulgaris	N36
HVAEP1-G005649	Hydra vulgaris	N36
HVAEP1-G006240	Hydra vulgaris	N36
HVAEP1-G025018	Hydra vulgaris	N36
HVAEP1-G012504	Hydra vulgaris	N36
HVAEP1-G008154	Hydra vulgaris	N36
HVAEP1-G000532	Hydra vulgaris	N36
HVAEP1-G019950	Hydra vulgaris	N36
HVAEP1-G018331	Hydra vulgaris	N36
HVAEP1-G019610	Hydra vulgaris	N36
HVAEP1-G002967	Hydra vulgaris	N36
HVAEP1-G019741	Hydra vulgaris	N36
HVAEP1-G008859	Hydra vulgaris	N36
HVAEP1-G010980	Hydra vulgaris	N36
HVAEP1-G010979	Hydra vulgaris	N36
HVAEP1-G011010	Hydra vulgaris	N36
HVAEP1-G012021	Hydra vulgaris	N36
HVAEP1-G001733	Hydra vulgaris	N36
HVAEP1-G015601	Hydra vulgaris	N36
HVAEP1-G015660	Hydra vulgaris	N36
HVAEP1-G000533	Hydra vulgaris	N36
HVAEP1-G022497	Hydra vulgaris	N36
HVAEP1-G013928	Hydra vulgaris	N36
HVAEP1-G003276	Hydra vulgaris	N36
HVAEP1-G003274	Hydra vulgaris	N36
HVAEP1-G003305	Hydra vulgaris	N36
HVAEP1-G003291	Hydra vulgaris	N36
HVAEP1-G003304	Hydra vulgaris	N36
HVAEP1-G003307	Hydra vulgaris	N36
HVAEP1-G003267	Hydra vulgaris	N36
HVAEP1-G020986	Hydra vulgaris	N36
HVAEP1-G014244	Hydra vulgaris	N36
HVAEP1-G003295	Hydra vulgaris	N36
HVAEP1-G014246	Hydra vulgaris	N36
HVAEP1-G014241	Hydra vulgaris	N36
HVAEP1-G003287	Hydra vulgaris	N36
HVAEP1-G003300	Hydra vulgaris	N36
HVAEP1-G003299	Hydra vulgaris	N36
HVAEP1-G014243	Hydra vulgaris	N36
HVAEP1-G014247	Hydra vulgaris	N36
HVAEP1-G014242	Hydra vulgaris	N36
HVAEP1-G003303	Hydra vulgaris	N36
HVAEP1-G003264	Hydra vulgaris	N36
HVAEP1-G011346	Hydra vulgaris	N36
HVAEP1-G010122	Hydra vulgaris	N36
HVAEP1-G014245	Hydra vulgaris	N36
HVAEP1-G003253	Hydra vulgaris	N36
HVAEP1-G003266	Hydra vulgaris	N36
HVAEP1-G001922	Hydra vulgaris	N36
HVAEP1-G013520	Hydra vulgaris	N36
HVAEP1-G003286	Hydra vulgaris	N36
HVAEP1-G028258	Hydra vulgaris	N36
HVAEP1-G013171	Hydra vulgaris	N36
HVAEP1-G024477	Hydra vulgaris	N36
HVAEP1-G024479	Hydra vulgaris	N36
HVAEP1-G025893	Hydra vulgaris	N36
HVAEP1-G025508	Hydra vulgaris	N36
HVAEP1-G010870	Hydra vulgaris	N36
HVAEP1-G009962	Hydra vulgaris	N36
HVAEP1-G025492	Hydra vulgaris	N36
HVAEP1-G006241	Hydra vulgaris	N36
HVAEP1-G012055	Hydra vulgaris	N36
HVAEP1-G021562	Hydra vulgaris	N36
HVAEP1-G009876	Hydra vulgaris	N36
HVAEP1-G007520	Hydra vulgaris	N36
HVAEP1-G004609	Hydra vulgaris	N36
HVAEP1-G009043	Hydra vulgaris	N36
HVAEP1-G003225	Hydra vulgaris	N36
HVAEP1-G025105	Hydra vulgaris	N36
HVAEP1-G002244	Hydra vulgaris	N36
HVAEP1-G009165	Hydra vulgaris	N36
HVAEP1-G027029	Hydra vulgaris	N36
HVAEP1-G015768	Hydra vulgaris	N36
HVAEP1-G004602	Hydra vulgaris	N36
HVAEP1-G015169	Hydra vulgaris	N36
HVAEP1-G002766	Hydra vulgaris	N36
HVAEP1-G012272	Hydra vulgaris	N36
HVAEP1-G008574	Hydra vulgaris	N36
HVAEP1-G024415	Hydra vulgaris	N36
HVAEP1-G004973	Hydra vulgaris	N36
HVAEP1-G004432	Hydra vulgaris	N36
HVAEP1-G008573	Hydra vulgaris	N36
HVAEP1-G015196	Hydra vulgaris	N36
HVAEP1-G020325	Hydra vulgaris	N36
HVAEP1-G024967	Hydra vulgaris	N36
HVAEP1-G012108	Hydra vulgaris	N36
HVAEP1-G028598	Hydra vulgaris	N36
HVAEP1-G012110	Hydra vulgaris	N36
HVAEP1-G001230	Hydra vulgaris	N36
HVAEP1-G013291	Hydra vulgaris	N36
HVAEP1-G018850	Hydra vulgaris	N36
HVAEP1-G012125	Hydra vulgaris	N36
HVAEP1-G019872	Hydra vulgaris	N36
HVAEP1-G002329	Hydra vulgaris	N36
HVAEP1-G026132	Hydra vulgaris	N36
HVAEP1-G023730	Hydra vulgaris	N36
HVAEP1-G017241	Hydra vulgaris	N36
HVAEP1-G026975	Hydra vulgaris	N36
HVAEP1-G013711	Hydra vulgaris	N36
HVAEP1-G010230	Hydra vulgaris	N36
HVAEP1-G021717	Hydra vulgaris	N36
HVAEP1-G003280	Hydra vulgaris	N36
HVAEP1-G001912	Hydra vulgaris	N36
HVAEP1-G001921	Hydra vulgaris	N36
HVAEP1-G002212	Hydra vulgaris	N36
HVAEP1-G002197	Hydra vulgaris	N36
HVAEP1-G001905	Hydra vulgaris	N36
HVAEP1-G001907	Hydra vulgaris	N36
HVAEP1-G002198	Hydra vulgaris	N36
HVAEP1-G002203	Hydra vulgaris	N36
HVAEP1-G001915	Hydra vulgaris	N36
HVAEP1-G002214	Hydra vulgaris	N36
HVAEP1-G002184	Hydra vulgaris	N36
HVAEP1-G002190	Hydra vulgaris	N36
HVAEP1-G002209	Hydra vulgaris	N36
HVAEP1-G002186	Hydra vulgaris	N36
HVAEP1-G002191	Hydra vulgaris	N36
HVAEP1-G002215	Hydra vulgaris	N36
HVAEP1-G002200	Hydra vulgaris	N36
HVAEP1-G002195	Hydra vulgaris	N36
HVAEP1-G002208	Hydra vulgaris	N36
HVAEP1-G002196	Hydra vulgaris	N36
HVAEP1-G002201	Hydra vulgaris	N36
HVAEP1-G005093	Hydra vulgaris	N36
HVAEP1-G026999	Hydra vulgaris	N36
HVAEP1-G005925	Hydra vulgaris	N36
HVAEP1-G015495	Hydra vulgaris	N36
HVAEP1-G004929	Hydra vulgaris	N36
HVAEP1-G002507	Hydra vulgaris	N36
HVAEP1-G018742	Hydra vulgaris	N36
HVAEP1-G012454	Hydra vulgaris	N36
HVAEP1-G022679	Hydra vulgaris	N36
HVAEP1-G013853	Hydra vulgaris	N36
HVAEP1-G011479	Hydra vulgaris	N36
HVAEP1-G020667	Hydra vulgaris	N36
HVAEP1-G017005	Hydra vulgaris	N36
HVAEP1-G011460	Hydra vulgaris	N36
HVAEP1-G015907	Hydra vulgaris	N36
HVAEP1-G015860	Hydra vulgaris	N36
HVAEP1-G025594	Hydra vulgaris	N36
HVAEP1-G025947	Hydra vulgaris	N36
HVAEP1-G017187	Hydra vulgaris	N36
HVAEP1-G013157	Hydra vulgaris	N36
HVAEP1-G017365	Hydra vulgaris	N36
HVAEP1-G007884	Hydra vulgaris	N36
HVAEP1-G010994	Hydra vulgaris	N36
HVAEP1-G017878	Hydra vulgaris	N36
HVAEP1-G025712	Hydra vulgaris	N36
HVAEP1-G005356	Hydra vulgaris	N36
HVAEP1-G002965	Hydra vulgaris	N36
HVAEP1-G018754	Hydra vulgaris	N36
HVAEP1-G019269	Hydra vulgaris	N36
HVAEP1-G024140	Hydra vulgaris	N36
HVAEP1-G024334	Hydra vulgaris	N36
HVAEP1-G015127	Hydra vulgaris	N36
HVAEP1-G011420	Hydra vulgaris	N36
HVAEP1-G024624	Hydra vulgaris	N36
HVAEP1-G025107	Hydra vulgaris	N36
HVAEP1-G009823	Hydra vulgaris	N36
HVAEP1-G011370	Hydra vulgaris	N36
HVAEP1-G026833	Hydra vulgaris	N36
HVAEP1-G001133	Hydra vulgaris	N36
HVAEP1-G008800	Hydra vulgaris	N36
HVAEP1-G009270	Hydra vulgaris	N36
HVAEP1-G026929	Hydra vulgaris	N36
HVAEP1-G005179	Hydra vulgaris	N36
HVAEP1-G006621	Hydra vulgaris	N36
HVAEP1-G024281	Hydra vulgaris	N36
HVAEP1-G003856	Hydra vulgaris	N36
HVAEP1-G019356	Hydra vulgaris	N36
HVAEP1-G019084	Hydra vulgaris	N36
HVAEP1-G002906	Hydra vulgaris	N36
HVAEP1-G016058	Hydra vulgaris	N36
HVAEP1-G025433	Hydra vulgaris	N36
HVAEP1-G015318	Hydra vulgaris	N36
HVAEP1-G019374	Hydra vulgaris	N36
HVAEP1-G020577	Hydra vulgaris	N36
HVAEP1-G007467	Hydra vulgaris	N36
HVAEP1-G020231	Hydra vulgaris	N36
HVAEP1-G027407	Hydra vulgaris	N36
HVAEP1-G020415	Hydra vulgaris	N36
HVAEP1-G015153	Hydra vulgaris	N36
HVAEP1-G008388	Hydra vulgaris	N36
HVAEP1-G016068	Hydra vulgaris	N36
HVAEP1-G013317	Hydra vulgaris	N36
HVAEP1-G008841	Hydra vulgaris	N36
HVAEP1-G015120	Hydra vulgaris	N36
HVAEP1-G020350	Hydra vulgaris	N36
HVAEP1-G013301	Hydra vulgaris	N36
HVAEP1-G010135	Hydra vulgaris	N36
HVAEP1-G001305	Hydra vulgaris	N36
HVAEP1-G016067	Hydra vulgaris	N36
HVAEP1-G019096	Hydra vulgaris	N36
HVAEP1-G008810	Hydra vulgaris	N36
HVAEP1-G016069	Hydra vulgaris	N36
HVAEP1-G024662	Hydra vulgaris	N36
HVAEP1-G026070	Hydra vulgaris	N36
HVAEP1-G008809	Hydra vulgaris	N36
HVAEP1-G008815	Hydra vulgaris	N36
HVAEP1-G015778	Hydra vulgaris	N36
HVAEP1-G023689	Hydra vulgaris	N36
HVAEP1-G002630	Hydra vulgaris	N36
HVAEP1-G007493	Hydra vulgaris	N36
HVAEP1-G003710	Hydra vulgaris	N36
HVAEP1-G027088	Hydra vulgaris	N36
HVAEP1-G027532	Hydra vulgaris	N36
HVAEP1-G025988	Hydra vulgaris	N36
HVAEP1-G024367	Hydra vulgaris	N36
HVAEP1-G027333	Hydra vulgaris	N36
HVAEP1-G003133	Hydra vulgaris	N36
HVAEP1-G010435	Hydra vulgaris	N36
HVAEP1-G003138	Hydra vulgaris	N36
HVAEP1-G027330	Hydra vulgaris	N36
HVAEP1-G027328	Hydra vulgaris	N36
HVAEP1-G027329	Hydra vulgaris	N36
HVAEP1-G012359	Hydra vulgaris	N36
HVAEP1-G012360	Hydra vulgaris	N36
HVAEP1-G017009	Hydra vulgaris	N36
HVAEP1-G028465	Hydra vulgaris	N36
HVAEP1-G017010	Hydra vulgaris	N36
HVAEP1-G005569	Hydra vulgaris	N36
HVAEP1-G009155	Hydra vulgaris	N36
HVAEP1-G025936	Hydra vulgaris	N36
HVAEP1-G003432	Hydra vulgaris	N36
HVAEP1-G025794	Hydra vulgaris	N36
HVAEP1-G010642	Hydra vulgaris	N36
HVAEP1-G007166	Hydra vulgaris	N36
HVAEP1-G012361	Hydra vulgaris	N36
HVAEP1-G012362	Hydra vulgaris	N36
HVAEP1-G026053	Hydra vulgaris	N36
HVAEP1-G026054	Hydra vulgaris	N36
HVAEP1-G007167	Hydra vulgaris	N36
HVAEP1-G022860	Hydra vulgaris	N36
HVAEP1-G001404	Hydra vulgaris	N36
HVAEP1-G015624	Hydra vulgaris	N36
HVAEP1-G020746	Hydra vulgaris	N36
HVAEP1-G018122	Hydra vulgaris	N36
HVAEP1-G006874	Hydra vulgaris	N36
HVAEP1-G011894	Hydra vulgaris	N36
HVAEP1-G015092	Hydra vulgaris	N36
HVAEP1-G021813	Hydra vulgaris	N36
HVAEP1-G017318	Hydra vulgaris	N36
HVAEP1-G011103	Hydra vulgaris	N36
HVAEP1-G008440	Hydra vulgaris	N36
HVAEP1-G008439	Hydra vulgaris	N36
HVAEP1-G006873	Hydra vulgaris	N36
HVAEP1-G002975	Hydra vulgaris	N36
HVAEP1-G023916	Hydra vulgaris	N36
HVAEP1-G023168	Hydra vulgaris	N36
HVAEP1-G021538	Hydra vulgaris	N36
HVAEP1-G024710	Hydra vulgaris	N36
HVAEP1-G000646	Hydra vulgaris	N36
HVAEP1-G027643	Hydra vulgaris	N36
HVAEP1-G019500	Hydra vulgaris	N36
HVAEP1-G028070	Hydra vulgaris	N36
HVAEP1-G012173	Hydra vulgaris	N36
HVAEP1-G004786	Hydra vulgaris	N36
HVAEP1-G020013	Hydra vulgaris	N36
HVAEP1-G020044	Hydra vulgaris	N36
HVAEP1-G015727	Hydra vulgaris	N36
HVAEP1-G002981	Hydra vulgaris	N36
HVAEP1-G002982	Hydra vulgaris	N36
HVAEP1-G006386	Hydra vulgaris	N36
HVAEP1-G020037	Hydra vulgaris	N36
HVAEP1-G003767	Hydra vulgaris	N36
HVAEP1-G009701	Hydra vulgaris	N36
HVAEP1-G026304	Hydra vulgaris	N36
HVAEP1-G016267	Hydra vulgaris	N36
HVAEP1-G009269	Hydra vulgaris	N36
HVAEP1-G027114	Hydra vulgaris	N36
HVAEP1-G003855	Hydra vulgaris	N36
HVAEP1-G019355	Hydra vulgaris	N36
HVAEP1-G020412	Hydra vulgaris	N36
HVAEP1-G027405	Hydra vulgaris	N36
HVAEP1-G019082	Hydra vulgaris	N36
HVAEP1-G020580	Hydra vulgaris	N36
HVAEP1-G002908	Hydra vulgaris	N36
HVAEP1-G019376	Hydra vulgaris	N36
HVAEP1-G027890	Hydra vulgaris	N36
HVAEP1-G002522	Hydra vulgaris	N36
HVAEP1-G027966	Hydra vulgaris	N36
HVAEP1-G028754	Hydra vulgaris	N36
HVAEP1-G028755	Hydra vulgaris	N36
HVAEP1-G001182	Hydra vulgaris	N36
HVAEP1-G003702	Hydra vulgaris	N36
HVAEP1-G019027	Hydra vulgaris	N36
HVAEP1-G020024	Hydra vulgaris	N36
HVAEP1-G006785	Hydra vulgaris	N36
HVAEP1-G009066	Hydra vulgaris	N36
HVAEP1-G017287	Hydra vulgaris	N36
HVAEP1-G001253	Hydra vulgaris	N36
HVAEP1-G002905	Hydra vulgaris	N36
HVAEP1-G025299	Hydra vulgaris	N36
HVAEP1-G025838	Hydra vulgaris	N36
HVAEP1-G010902	Hydra vulgaris	N36
HVAEP1-G013869	Hydra vulgaris	N36
HVAEP1-G004391	Hydra vulgaris	N36
HVAEP1-G021348	Hydra vulgaris	N36
HVAEP1-G002947	Hydra vulgaris	N36
HVAEP1-G009948	Hydra vulgaris	N36
HVAEP1-G013717	Hydra vulgaris	N36
HVAEP1-G027274	Hydra vulgaris	N36
HVAEP1-G010833	Hydra vulgaris	N36
HVAEP1-G001498	Hydra vulgaris	N36
HVAEP1-G021143	Hydra vulgaris	N36
HVAEP1-G023840	Hydra vulgaris	N36
HVAEP1-G001845	Hydra vulgaris	N36
HVAEP1-G012036	Hydra vulgaris	N36
HVAEP1-G016025	Hydra vulgaris	N36
HVAEP1-G017055	Hydra vulgaris	N36
HVAEP1-G011953	Hydra vulgaris	N36
HVAEP1-G024370	Hydra vulgaris	N36
HVAEP1-G004688	Hydra vulgaris	N36
HVAEP1-G011809	Hydra vulgaris	N36
HVAEP1-G012777	Hydra vulgaris	N36
HVAEP1-G007279	Hydra vulgaris	N36
HVAEP1-G022566	Hydra vulgaris	N36
HVAEP1-G020844	Hydra vulgaris	N36
HVAEP1-G022196	Hydra vulgaris	N36
HVAEP1-G018474	Hydra vulgaris	N36
HVAEP1-G015676	Hydra vulgaris	N36
HVAEP1-G007080	Hydra vulgaris	N36
HVAEP1-G020355	Hydra vulgaris	N36
HVAEP1-G016877	Hydra vulgaris	N36
HVAEP1-G008828	Hydra vulgaris	N36
HVAEP1-G008694	Hydra vulgaris	N36
HVAEP1-G009430	Hydra vulgaris	N36
HVAEP1-G028827	Hydra vulgaris	N36
HVAEP1-G027713	Hydra vulgaris	N36
HVAEP1-G022707	Hydra vulgaris	N36
HVAEP1-G019409	Hydra vulgaris	N36
HVAEP1-G001717	Hydra vulgaris	N36
HVAEP1-G002464	Hydra vulgaris	N36
HVAEP1-G025415	Hydra vulgaris	N36
HVAEP1-G020583	Hydra vulgaris	N36
HVAEP1-G001716	Hydra vulgaris	N36
HVAEP1-G005468	Hydra vulgaris	N36
HVAEP1-G012827	Hydra vulgaris	N36
HVAEP1-G015404	Hydra vulgaris	N36
HVAEP1-G026342	Hydra vulgaris	N36
HVAEP1-G001715	Hydra vulgaris	N36
HVAEP1-G026341	Hydra vulgaris	N36
HVAEP1-G012826	Hydra vulgaris	N36
HVAEP1-G005469	Hydra vulgaris	N36
HVAEP1-G022706	Hydra vulgaris	N36
HVAEP1-G019407	Hydra vulgaris	N36
HVAEP1-G016162	Hydra vulgaris	N36
HVAEP1-G021704	Hydra vulgaris	N36
HVAEP1-G004182	Hydra vulgaris	N36
HVAEP1-G016163	Hydra vulgaris	N36
HVAEP1-G019408	Hydra vulgaris	N36
HVAEP1-G020584	Hydra vulgaris	N36
HVAEP1-G007261	Hydra vulgaris	N36
HVAEP1-G007254	Hydra vulgaris	N36
HVAEP1-G007259	Hydra vulgaris	N36
HVAEP1-G007249	Hydra vulgaris	N36
HVAEP1-G007255	Hydra vulgaris	N36
HVAEP1-G003599	Hydra vulgaris	N36
HVAEP1-G015434	Hydra vulgaris	N36
HVAEP1-G015433	Hydra vulgaris	N36
HVAEP1-G003602	Hydra vulgaris	N36
HVAEP1-G003593	Hydra vulgaris	N36
HVAEP1-G003598	Hydra vulgaris	N36
HVAEP1-G003600	Hydra vulgaris	N36
HVAEP1-G018617	Hydra vulgaris	N36
HVAEP1-G018618	Hydra vulgaris	N36
HVAEP1-G018619	Hydra vulgaris	N36
HVAEP1-G018620	Hydra vulgaris	N36
HVAEP1-G017216	Hydra vulgaris	N36
HVAEP1-G024148	Hydra vulgaris	N36
HVAEP1-G019605	Hydra vulgaris	N36
HVAEP1-G005933	Hydra vulgaris	N36
HVAEP1-G007585	Hydra vulgaris	N36
HVAEP1-G017668	Hydra vulgaris	N36
HVAEP1-G001019	Hydra vulgaris	N36
HVAEP1-G004252	Hydra vulgaris	N36
HVAEP1-G000282	Hydra vulgaris	N36
HVAEP1-G015348	Hydra vulgaris	N36
HVAEP1-G005932	Hydra vulgaris	N36
HVAEP1-G019604	Hydra vulgaris	N36
HVAEP1-G001017	Hydra vulgaris	N36
HVAEP1-G017669	Hydra vulgaris	N36
HVAEP1-G006858	Hydra vulgaris	N36
HVAEP1-G024118	Hydra vulgaris	N36
HVAEP1-G006636	Hydra vulgaris	N36
HVAEP1-G006696	Hydra vulgaris	N36
HVAEP1-G022329	Hydra vulgaris	N36
HVAEP1-G011711	Hydra vulgaris	N36
HVAEP1-G015540	Hydra vulgaris	N36
HVAEP1-G019360	Hydra vulgaris	N36
HVAEP1-G023988	Hydra vulgaris	N36
HVAEP1-G019358	Hydra vulgaris	N36
HVAEP1-G021784	Hydra vulgaris	N36
HVAEP1-G015528	Hydra vulgaris	N36
HVAEP1-G019357	Hydra vulgaris	N36
HVAEP1-G023987	Hydra vulgaris	N36
HVAEP1-G007341	Hydra vulgaris	N36
HVAEP1-G015529	Hydra vulgaris	N36
HVAEP1-G007338	Hydra vulgaris	N36
HVAEP1-G001104	Hydra vulgaris	N36
HVAEP1-G005161	Hydra vulgaris	N36
HVAEP1-G026879	Hydra vulgaris	N36
HVAEP1-G025482	Hydra vulgaris	N36
HVAEP1-G015542	Hydra vulgaris	N36
HVAEP1-G019362	Hydra vulgaris	N36
HVAEP1-G007336	Hydra vulgaris	N36
HVAEP1-G015532	Hydra vulgaris	N36
HVAEP1-G023991	Hydra vulgaris	N36
HVAEP1-G011709	Hydra vulgaris	N36
HVAEP1-G005755	Hydra vulgaris	N36
HVAEP1-G021782	Hydra vulgaris	N36
HVAEP1-G003098	Hydra vulgaris	N36
HVAEP1-G005070	Hydra vulgaris	N36
HVAEP1-G005052	Hydra vulgaris	N36
HVAEP1-G003099	Hydra vulgaris	N36
HVAEP1-G003069	Hydra vulgaris	N36
HVAEP1-G015033	Hydra vulgaris	N36
HVAEP1-G003859	Hydra vulgaris	N36
HVAEP1-G019486	Hydra vulgaris	N36
HVAEP1-G021254	Hydra vulgaris	N36
HVAEP1-G000432	Hydra vulgaris	N36
HVAEP1-G019489	Hydra vulgaris	N36
HVAEP1-G000634	Hydra vulgaris	N36
HVAEP1-G011949	Hydra vulgaris	N36
HVAEP1-G011983	Hydra vulgaris	N36
HVAEP1-G004348	Hydra vulgaris	N36
HVAEP1-G022732	Hydra vulgaris	N36
HVAEP1-G013877	Hydra vulgaris	N36
HVAEP1-G023614	Hydra vulgaris	N36
HVAEP1-G011948	Hydra vulgaris	N36
HVAEP1-G011984	Hydra vulgaris	N36
HVAEP1-G019037	Hydra vulgaris	N36
HVAEP1-G015468	Hydra vulgaris	N36
HVAEP1-G022733	Hydra vulgaris	N36
HVAEP1-G027660	Hydra vulgaris	N36
HVAEP1-G016533	Hydra vulgaris	N36
HVAEP1-G016532	Hydra vulgaris	N36
HVAEP1-G027377	Hydra vulgaris	N36
HVAEP1-G012498	Hydra vulgaris	N36
HVAEP1-G020556	Hydra vulgaris	N36
HVAEP1-G008639	Hydra vulgaris	N36
HVAEP1-G003137	Hydra vulgaris	N36
HVAEP1-G007160	Hydra vulgaris	N36
HVAEP1-G018914	Hydra vulgaris	N36
HVAEP1-G024568	Hydra vulgaris	N36
HVAEP1-G007492	Hydra vulgaris	N36
HVAEP1-G025989	Hydra vulgaris	N36
HVAEP1-G023690	Hydra vulgaris	N36
HVAEP1-G024368	Hydra vulgaris	N36
HVAEP1-G027533	Hydra vulgaris	N36
HVAEP1-G020409	Hydra vulgaris	N36
HVAEP1-G014514	Hydra vulgaris	N36
HVAEP1-G014543	Hydra vulgaris	N36
HVAEP1-G014521	Hydra vulgaris	N36
HVAEP1-G014556	Hydra vulgaris	N36
HVAEP1-G014522	Hydra vulgaris	N36
HVAEP1-G014512	Hydra vulgaris	N36
HVAEP1-G014520	Hydra vulgaris	N36
HVAEP1-G014506	Hydra vulgaris	N36
HVAEP1-G014513	Hydra vulgaris	N36
HVAEP1-G014511	Hydra vulgaris	N36
HVAEP1-G015685	Hydra vulgaris	N36
HVAEP1-G028106	Hydra vulgaris	N36
HVAEP1-G018386	Hydra vulgaris	N36
HVAEP1-G026890	Hydra vulgaris	N36
HVAEP1-G025743	Hydra vulgaris	N36
HVAEP1-G019901	Hydra vulgaris	N36
HVAEP1-G026185	Hydra vulgaris	N36
HVAEP1-G000270	Hydra vulgaris	N36
HVAEP1-G000400	Hydra vulgaris	N36
HVAEP1-G000248	Hydra vulgaris	N36
HVAEP1-G002031	Hydra vulgaris	N36
HVAEP1-G015486	Hydra vulgaris	N36
HVAEP1-G001152	Hydra vulgaris	N36
HVAEP1-G000494	Hydra vulgaris	N36
HVAEP1-G001816	Hydra vulgaris	N36
HVAEP1-G005606	Hydra vulgaris	N36
HVAEP1-G021137	Hydra vulgaris	N36
HVAEP1-G004749	Hydra vulgaris	N36
HVAEP1-G009219	Hydra vulgaris	N36
HVAEP1-G015751	Hydra vulgaris	N36
HVAEP1-G003222	Hydra vulgaris	N36
HVAEP1-G011843	Hydra vulgaris	N36
HVAEP1-G007430	Hydra vulgaris	N36
HVAEP1-G017733	Hydra vulgaris	N36
HVAEP1-G015750	Hydra vulgaris	N36
HVAEP1-G016860	Hydra vulgaris	N36
HVAEP1-G007431	Hydra vulgaris	N36
HVAEP1-G003434	Hydra vulgaris	N36
HVAEP1-G008280	Hydra vulgaris	N36
HVAEP1-G012713	Hydra vulgaris	N36
HVAEP1-G019787	Hydra vulgaris	N36
HVAEP1-G008042	Hydra vulgaris	N36
HVAEP1-G000430	Hydra vulgaris	N36
HVAEP1-G025276	Hydra vulgaris	N36
HVAEP1-G014222	Hydra vulgaris	N36
HVAEP1-G014435	Hydra vulgaris	N36
HVAEP1-G024261	Hydra vulgaris	N36
HVAEP1-G015929	Hydra vulgaris	N36
HVAEP1-G007182	Hydra vulgaris	N36
HVAEP1-G013234	Hydra vulgaris	N36
HVAEP1-G002611	Hydra vulgaris	N36
HVAEP1-G026242	Hydra vulgaris	N36
HVAEP1-G027372	Hydra vulgaris	N36
HVAEP1-G018996	Hydra vulgaris	N36
HVAEP1-G019000	Hydra vulgaris	N36
HVAEP1-G000099	Hydra vulgaris	N36
HVAEP1-G000100	Hydra vulgaris	N36
HVAEP1-G000274	Hydra vulgaris	N36
HVAEP1-G002777	Hydra vulgaris	N36
HVAEP1-G028820	Hydra vulgaris	N36
HVAEP1-G028833	Hydra vulgaris	N36
HVAEP1-G007949	Hydra vulgaris	N36
HVAEP1-G027305	Hydra vulgaris	N36
HVAEP1-G012308	Hydra vulgaris	N36
HVAEP1-G019394	Hydra vulgaris	N36
HVAEP1-G006467	Hydra vulgaris	N36
HVAEP1-G016330	Hydra vulgaris	N36
HVAEP1-G013219	Hydra vulgaris	N36
HVAEP1-G020552	Hydra vulgaris	N36
HVAEP1-G024599	Hydra vulgaris	N36
HVAEP1-G001824	Hydra vulgaris	N36
HVAEP1-G009328	Hydra vulgaris	N36
HVAEP1-G004893	Hydra vulgaris	N36
HVAEP1-G023304	Hydra vulgaris	N36
HVAEP1-G024339	Hydra vulgaris	N36
HVAEP1-G002545	Hydra vulgaris	N36
HVAEP1-G027148	Hydra vulgaris	N36
HVAEP1-G027152	Hydra vulgaris	N36
HVAEP1-G028828	Hydra vulgaris	N36
HVAEP1-G028834	Hydra vulgaris	N36
HVAEP1-G020644	Hydra vulgaris	N36
HVAEP1-G021256	Hydra vulgaris	N36
HVAEP1-G018815	Hydra vulgaris	N36
HVAEP1-G005365	Hydra vulgaris	N36
HVAEP1-G011570	Hydra vulgaris	N36
HVAEP1-G000089	Hydra vulgaris	N36
HVAEP1-G011568	Hydra vulgaris	N36
HVAEP1-G011504	Hydra vulgaris	N36
HVAEP1-G021740	Hydra vulgaris	N36
HVAEP1-G028832	Hydra vulgaris	N36
HVAEP1-G022939	Hydra vulgaris	N36
HVAEP1-G017829	Hydra vulgaris	N36
HVAEP1-G011217	Hydra vulgaris	N36
HVAEP1-G012831	Hydra vulgaris	N36
HVAEP1-G005592	Hydra vulgaris	N36
HVAEP1-G024391	Hydra vulgaris	N36
HVAEP1-G024378	Hydra vulgaris	N36
HVAEP1-G009267	Hydra vulgaris	N36
HVAEP1-G018485	Hydra vulgaris	N36
HVAEP1-G000748	Hydra vulgaris	N36
HVAEP1-G010325	Hydra vulgaris	N36
HVAEP1-G026792	Hydra vulgaris	N36
HVAEP1-G012245	Hydra vulgaris	N36
HVAEP1-G027559	Hydra vulgaris	N36
HVAEP1-G025994	Hydra vulgaris	N36
HVAEP1-G025971	Hydra vulgaris	N36
HVAEP1-G015140	Hydra vulgaris	N36
HVAEP1-G000716	Hydra vulgaris	N36
HVAEP1-G021968	Hydra vulgaris	N36
HVAEP1-G010310	Hydra vulgaris	N36
HVAEP1-G015662	Hydra vulgaris	N36
HVAEP1-G000747	Hydra vulgaris	N36
HVAEP1-G017026	Hydra vulgaris	N36
HVAEP1-G014840	Hydra vulgaris	N36
HVAEP1-G010016	Hydra vulgaris	N36
HVAEP1-G005704	Hydra vulgaris	N36
HVAEP1-G001236	Hydra vulgaris	N36
HVAEP1-G027846	Hydra vulgaris	N36
HVAEP1-G002793	Hydra vulgaris	N36
HVAEP1-G027155	Hydra vulgaris	N36
HVAEP1-G009863	Hydra vulgaris	N36
HVAEP1-G025012	Hydra vulgaris	N36
HVAEP1-G000650	Hydra vulgaris	N36
HVAEP1-G004933	Hydra vulgaris	N36
HVAEP1-G023300	Hydra vulgaris	N36
HVAEP1-G012040	Hydra vulgaris	N36
HVAEP1-G024341	Hydra vulgaris	N36
HVAEP1-G018389	Hydra vulgaris	N36
HVAEP1-G001154	Hydra vulgaris	N36
HVAEP1-G007759	Hydra vulgaris	N36
HVAEP1-G012039	Hydra vulgaris	N36
HVAEP1-G024601	Hydra vulgaris	N36
HVAEP1-G009224	Hydra vulgaris	N36
HVAEP1-G003469	Hydra vulgaris	N36
HVAEP1-G024278	Hydra vulgaris	N36
HVAEP1-G005000	Hydra vulgaris	N36
HVAEP1-G026032	Hydra vulgaris	N36
HVAEP1-G004764	Hydra vulgaris	N36
HVAEP1-G012462	Hydra vulgaris	N36
HVAEP1-G012099	Hydra vulgaris	N36
HVAEP1-G027145	Hydra vulgaris	N36
HVAEP1-G015641	Hydra vulgaris	N36
HVAEP1-G010218	Hydra vulgaris	N36
HVAEP1-G008883	Hydra vulgaris	N36
HVAEP1-G011427	Hydra vulgaris	N36
HVAEP1-G011428	Hydra vulgaris	N36
HVAEP1-G025246	Hydra vulgaris	N36
HVAEP1-G025170	Hydra vulgaris	N36
HVAEP1-G027320	Hydra vulgaris	N36
HVAEP1-G018407	Hydra vulgaris	N36
HVAEP1-G022773	Hydra vulgaris	N36
HVAEP1-G010663	Hydra vulgaris	N36
HVAEP1-G020923	Hydra vulgaris	N36
HVAEP1-G016609	Hydra vulgaris	N36
HVAEP1-G020924	Hydra vulgaris	N36
HVAEP1-G025551	Hydra vulgaris	N36
HVAEP1-G013486	Hydra vulgaris	N36
HVAEP1-G005773	Hydra vulgaris	N36
HVAEP1-G011776	Hydra vulgaris	N36
HVAEP1-G015650	Hydra vulgaris	N36
HVAEP1-G012464	Hydra vulgaris	N36
HVAEP1-G027529	Hydra vulgaris	N36
HVAEP1-G020777	Hydra vulgaris	N36
HVAEP1-G020778	Hydra vulgaris	N36
HVAEP1-G020779	Hydra vulgaris	N36
HVAEP1-G020795	Hydra vulgaris	N36
HVAEP1-G026607	Hydra vulgaris	N36
HVAEP1-G027588	Hydra vulgaris	N36
HVAEP1-G006914	Hydra vulgaris	N36
HVAEP1-G009182	Hydra vulgaris	N36
HVAEP1-G015450	Hydra vulgaris	N36
HVAEP1-G028129	Hydra vulgaris	N36
HVAEP1-G013342	Hydra vulgaris	N36
HVAEP1-G010734	Hydra vulgaris	N36
HVAEP1-G017473	Hydra vulgaris	N36
HVAEP1-G004539	Hydra vulgaris	N36
HVAEP1-G018579	Hydra vulgaris	N36
HVAEP1-G009853	Hydra vulgaris	N36
HVAEP1-G025201	Hydra vulgaris	N36
HVAEP1-G012211	Hydra vulgaris	N36
HVAEP1-G026314	Hydra vulgaris	N36
HVAEP1-G014943	Hydra vulgaris	N36
HVAEP1-G023895	Hydra vulgaris	N36
HVAEP1-G025166	Hydra vulgaris	N36
HVAEP1-G025176	Hydra vulgaris	N36
HVAEP1-G014586	Hydra vulgaris	N36
HVAEP1-G011455	Hydra vulgaris	N36
HVAEP1-G025791	Hydra vulgaris	N36
HVAEP1-G024685	Hydra vulgaris	N36
HVAEP1-G025056	Hydra vulgaris	N36
HVAEP1-G004780	Hydra vulgaris	N36
HVAEP1-G000403	Hydra vulgaris	N36
HVAEP1-G007910	Hydra vulgaris	N36
HVAEP1-G020107	Hydra vulgaris	N36
HVAEP1-G018776	Hydra vulgaris	N36
HVAEP1-G001270	Hydra vulgaris	N36
HVAEP1-G012725	Hydra vulgaris	N36
HVAEP1-G003325	Hydra vulgaris	N36
HVAEP1-G023588	Hydra vulgaris	N36
HVAEP1-G010781	Hydra vulgaris	N36
HVAEP1-G019261	Hydra vulgaris	N36
HVAEP1-G025037	Hydra vulgaris	N36
HVAEP1-G020301	Hydra vulgaris	N36
HVAEP1-G028727	Hydra vulgaris	N36
HVAEP1-G011941	Hydra vulgaris	N36
HVAEP1-G011962	Hydra vulgaris	N36
HVAEP1-G020302	Hydra vulgaris	N36
HVAEP1-G000503	Hydra vulgaris	N36
HVAEP1-G005613	Hydra vulgaris	N36
HVAEP1-G002866	Hydra vulgaris	N36
HVAEP1-G012911	Hydra vulgaris	N36
HVAEP1-G016342	Hydra vulgaris	N36
HVAEP1-G010910	Hydra vulgaris	N36
HVAEP1-G000165	Hydra vulgaris	N36
HVAEP1-G000417	Hydra vulgaris	N36
HVAEP1-G000170	Hydra vulgaris	N36
HVAEP1-G000288	Hydra vulgaris	N36
HVAEP1-G000729	Hydra vulgaris	N36
HVAEP1-G000730	Hydra vulgaris	N36
HVAEP1-G000221	Hydra vulgaris	N36
HVAEP1-G000229	Hydra vulgaris	N36
HVAEP1-G000307	Hydra vulgaris	N36
HVAEP1-G003269	Hydra vulgaris	N36
HVAEP1-G003271	Hydra vulgaris	N36
HVAEP1-G003247	Hydra vulgaris	N36
HVAEP1-G003297	Hydra vulgaris	N36
HVAEP1-G003261	Hydra vulgaris	N36
HVAEP1-G003263	Hydra vulgaris	N36
HVAEP1-G003273	Hydra vulgaris	N36
HVAEP1-G024737	Hydra vulgaris	N36
HVAEP1-G014612	Hydra vulgaris	N36
HVAEP1-G028198	Hydra vulgaris	N36
HVAEP1-G010899	Hydra vulgaris	N36
HVAEP1-G002509	Hydra vulgaris	N36
HVAEP1-G027304	Hydra vulgaris	N36
HVAEP1-G020427	Hydra vulgaris	N36
HVAEP1-G020426	Hydra vulgaris	N36
HVAEP1-G008499	Hydra vulgaris	N36
HVAEP1-G003671	Hydra vulgaris	N36
HVAEP1-G004356	Hydra vulgaris	N36
HVAEP1-G013499	Hydra vulgaris	N36
HVAEP1-G004265	Hydra vulgaris	N36
HVAEP1-G000687	Hydra vulgaris	N36
HVAEP1-G016314	Hydra vulgaris	N36
HVAEP1-G019863	Hydra vulgaris	N36
HVAEP1-G020818	Hydra vulgaris	N36
HVAEP1-G002378	Hydra vulgaris	N36
HVAEP1-G005524	Hydra vulgaris	N36
HVAEP1-G008891	Hydra vulgaris	N36
HVAEP1-G010352	Hydra vulgaris	N36
HVAEP1-G027724	Hydra vulgaris	N36
HVAEP1-G002377	Hydra vulgaris	N36
HVAEP1-G020819	Hydra vulgaris	N36
HVAEP1-G004077	Hydra vulgaris	N36
HVAEP1-G007719	Hydra vulgaris	N36
HVAEP1-G020293	Hydra vulgaris	N36
HVAEP1-G023598	Hydra vulgaris	N36
HVAEP1-G009506	Hydra vulgaris	N36
HVAEP1-G028165	Hydra vulgaris	N36
HVAEP1-G004882	Hydra vulgaris	N36
HVAEP1-G024941	Hydra vulgaris	N36
HVAEP1-G004690	Hydra vulgaris	N36
HVAEP1-G025521	Hydra vulgaris	N36
HVAEP1-G023052	Hydra vulgaris	N36
HVAEP1-G020639	Hydra vulgaris	N36
HVAEP1-G025650	Hydra vulgaris	N36
HVAEP1-G025520	Hydra vulgaris	N36
HVAEP1-G005098	Hydra vulgaris	N36
HVAEP1-G012502	Hydra vulgaris	N36
HVAEP1-G025197	Hydra vulgaris	N36
HVAEP1-G025878	Hydra vulgaris	N36
HVAEP1-G010817	Hydra vulgaris	N36
HVAEP1-G010818	Hydra vulgaris	N36
HVAEP1-G024609	Hydra vulgaris	N36
HVAEP1-G022016	Hydra vulgaris	N36
HVAEP1-G018277	Hydra vulgaris	N36
HVAEP1-G024358	Hydra vulgaris	N36
HVAEP1-G003298	Hydra vulgaris	N36
HVAEP1-G028110	Hydra vulgaris	N36
HVAEP1-G016556	Hydra vulgaris	N36
HVAEP1-G008160	Hydra vulgaris	N36
HVAEP1-G008161	Hydra vulgaris	N36
HVAEP1-G008164	Hydra vulgaris	N36
HVAEP1-G013018	Hydra vulgaris	N36
HVAEP1-G003915	Hydra vulgaris	N36
HVAEP1-G008136	Hydra vulgaris	N36
HVAEP1-G020362	Hydra vulgaris	N36
HVAEP1-G013078	Hydra vulgaris	N36
HVAEP1-G002016	Hydra vulgaris	N36
HVAEP1-G021004	Hydra vulgaris	N36
HVAEP1-G025766	Hydra vulgaris	N36
HVAEP1-G010144	Hydra vulgaris	N36
HVAEP1-G012984	Hydra vulgaris	N36
HVAEP1-G012981	Hydra vulgaris	N36
HVAEP1-G011076	Hydra vulgaris	N36
HVAEP1-G015326	Hydra vulgaris	N36
HVAEP1-G014419	Hydra vulgaris	N36
HVAEP1-G003834	Hydra vulgaris	N36
HVAEP1-G024557	Hydra vulgaris	N36
HVAEP1-G024590	Hydra vulgaris	N36
HVAEP1-G024555	Hydra vulgaris	N36
HVAEP1-G014487	Hydra vulgaris	N36
HVAEP1-G003301	Hydra vulgaris	N36
HVAEP1-G003292	Hydra vulgaris	N36
HVAEP1-G023153	Hydra vulgaris	N36
HVAEP1-G025940	Hydra vulgaris	N36
HVAEP1-G013382	Hydra vulgaris	N36
HVAEP1-G015141	Hydra vulgaris	N36
HVAEP1-G000715	Hydra vulgaris	N36
HVAEP1-G021967	Hydra vulgaris	N36
HVAEP1-G003879	Hydra vulgaris	N36
HVAEP1-G012075	Hydra vulgaris	N36
HVAEP1-G028861	Hydra vulgaris	N36
HVAEP1-G026887	Hydra vulgaris	N36
HVAEP1-G007610	Hydra vulgaris	N36
HVAEP1-G015266	Hydra vulgaris	N36
HVAEP1-G011831	Hydra vulgaris	N36
HVAEP1-G023784	Hydra vulgaris	N36
HVAEP1-G025418	Hydra vulgaris	N36
HVAEP1-G000423	Hydra vulgaris	N36
HVAEP1-G026875	Hydra vulgaris	N36
HVAEP1-G019050	Hydra vulgaris	N36
HVAEP1-G000065	Hydra vulgaris	N36
HVAEP1-G022997	Hydra vulgaris	N36
HVAEP1-G021085	Hydra vulgaris	N36
HVAEP1-G009374	Hydra vulgaris	N36
HVAEP1-G015466	Hydra vulgaris	N36
HVAEP1-G007784	Hydra vulgaris	N36
HVAEP1-G021893	Hydra vulgaris	N36
HVAEP1-G018544	Hydra vulgaris	N36
HVAEP1-G020368	Hydra vulgaris	N36
HVAEP1-G001676	Hydra vulgaris	N36
HVAEP1-G021565	Hydra vulgaris	N36
HVAEP1-G025861	Hydra vulgaris	N36
HVAEP1-G026730	Hydra vulgaris	N36
HVAEP1-G002040	Hydra vulgaris	N36
HVAEP1-G013196	Hydra vulgaris	N36
HVAEP1-G017704	Hydra vulgaris	N36
HVAEP1-G013861	Hydra vulgaris	N36
HVAEP1-G017003	Hydra vulgaris	N36
HVAEP1-G022983	Hydra vulgaris	N36
HVAEP1-G017927	Hydra vulgaris	N36
HVAEP1-G026288	Hydra vulgaris	N36
HVAEP1-G009804	Hydra vulgaris	N36
HVAEP1-G011116	Hydra vulgaris	N36
HVAEP1-G019599	Hydra vulgaris	N36
HVAEP1-G020747	Hydra vulgaris	N36
HVAEP1-G025082	Hydra vulgaris	N36
HVAEP1-G010280	Hydra vulgaris	N36
HVAEP1-G025847	Hydra vulgaris	N36
HVAEP1-G028294	Hydra vulgaris	N36
HVAEP1-G008401	Hydra vulgaris	N36
HVAEP1-G023944	Hydra vulgaris	N36
HVAEP1-G017439	Hydra vulgaris	N36
HVAEP1-G027094	Hydra vulgaris	N36
HVAEP1-G025067	Hydra vulgaris	N36
HVAEP1-G028155	Hydra vulgaris	N36
HVAEP1-G000962	Hydra vulgaris	N36
HVAEP1-G012949	Hydra vulgaris	N36
HVAEP1-G014592	Hydra vulgaris	N36
HVAEP1-G004668	Hydra vulgaris	N36
HVAEP1-G007693	Hydra vulgaris	N36
HVAEP1-G009779	Hydra vulgaris	N36
HVAEP1-G009775	Hydra vulgaris	N36
HVAEP1-G003386	Hydra vulgaris	N36
HVAEP1-G017440	Hydra vulgaris	N36
HVAEP1-G010840	Hydra vulgaris	N36
HVAEP1-G004491	Hydra vulgaris	N36
HVAEP1-G007443	Hydra vulgaris	N36
HVAEP1-G018851	Hydra vulgaris	N36
HVAEP1-G017905	Hydra vulgaris	N36
HVAEP1-G028207	Hydra vulgaris	N36
HVAEP1-G000128	Hydra vulgaris	N36
HVAEP1-G015798	Hydra vulgaris	N36
HVAEP1-G026531	Hydra vulgaris	N36
HVAEP1-G027632	Hydra vulgaris	N36
HVAEP1-G026665	Hydra vulgaris	N36
HVAEP1-G026549	Hydra vulgaris	N36
HVAEP1-G003072	Hydra vulgaris	N36
HVAEP1-G027929	Hydra vulgaris	N36
HVAEP1-G015657	Hydra vulgaris	N36
HVAEP1-G007808	Hydra vulgaris	N36
HVAEP1-G007807	Hydra vulgaris	N36
HVAEP1-G007810	Hydra vulgaris	N36
HVAEP1-G009193	Hydra vulgaris	N36
HVAEP1-G022837	Hydra vulgaris	N36
HVAEP1-G012748	Hydra vulgaris	N36
HVAEP1-G011432	Hydra vulgaris	N36
HVAEP1-G024153	Hydra vulgaris	N36
HVAEP1-G009601	Hydra vulgaris	N36
HVAEP1-G014769	Hydra vulgaris	N36
HVAEP1-G021433	Hydra vulgaris	N36
HVAEP1-G020607	Hydra vulgaris	N36
HVAEP1-G002397	Hydra vulgaris	N36
HVAEP1-G014974	Hydra vulgaris	N36
HVAEP1-G024566	Hydra vulgaris	N36
HVAEP1-G024565	Hydra vulgaris	N36
HVAEP1-G028078	Hydra vulgaris	N36
HVAEP1-G016426	Hydra vulgaris	N36
HVAEP1-G016428	Hydra vulgaris	N36
HVAEP1-G015390	Hydra vulgaris	N36
HVAEP1-G010067	Hydra vulgaris	N36
HVAEP1-G007392	Hydra vulgaris	N36
HVAEP1-G026156	Hydra vulgaris	N36
HVAEP1-G017463	Hydra vulgaris	N36
HVAEP1-G000547	Hydra vulgaris	N36
HVAEP1-G014069	Hydra vulgaris	N36
HVAEP1-G022895	Hydra vulgaris	N36
HVAEP1-G011043	Hydra vulgaris	N36
HVAEP1-G005875	Hydra vulgaris	N36
HVAEP1-G001107	Hydra vulgaris	N36
HVAEP1-G010534	Hydra vulgaris	N36
HVAEP1-G009048	Hydra vulgaris	N36
HVAEP1-G023155	Hydra vulgaris	N36
HVAEP1-G002185	Hydra vulgaris	N36
HVAEP1-G025479	Hydra vulgaris	N36
HVAEP1-G001901	Hydra vulgaris	N36
HVAEP1-G001902	Hydra vulgaris	N36
HVAEP1-G001903	Hydra vulgaris	N36
HVAEP1-G001911	Hydra vulgaris	N36
HVAEP1-G023301	Hydra vulgaris	N36
HVAEP1-G004635	Hydra vulgaris	N36
HVAEP1-G004841	Hydra vulgaris	N36
HVAEP1-G020854	Hydra vulgaris	N36
HVAEP1-G017326	Hydra vulgaris	N36
HVAEP1-G003346	Hydra vulgaris	N36
HVAEP1-G025738	Hydra vulgaris	N36
HVAEP1-G028816	Hydra vulgaris	N36
HVAEP1-G003776	Hydra vulgaris	N36
HVAEP1-G003779	Hydra vulgaris	N36
HVAEP1-G005866	Hydra vulgaris	N36
HVAEP1-G017534	Hydra vulgaris	N36
HVAEP1-G008353	Hydra vulgaris	N36
HVAEP1-G013286	Hydra vulgaris	N36
HVAEP1-G008641	Hydra vulgaris	N36
HVAEP1-G022309	Hydra vulgaris	N36
HVAEP1-G004678	Hydra vulgaris	N36
HVAEP1-G010040	Hydra vulgaris	N36
HVAEP1-G013133	Hydra vulgaris	N36
HVAEP1-G013408	Hydra vulgaris	N36
HVAEP1-G013296	Hydra vulgaris	N36
HVAEP1-G013314	Hydra vulgaris	N36
HVAEP1-G028057	Hydra vulgaris	N36
HVAEP1-G006655	Hydra vulgaris	N36
HVAEP1-G008747	Hydra vulgaris	N36
HVAEP1-G008915	Hydra vulgaris	N36
HVAEP1-G006113	Hydra vulgaris	N36
HVAEP1-G023083	Hydra vulgaris	N36
HVAEP1-G026005	Hydra vulgaris	N36
HVAEP1-G010469	Hydra vulgaris	N36
HVAEP1-G000648	Hydra vulgaris	N36
HVAEP1-G016085	Hydra vulgaris	N36
HVAEP1-G002836	Hydra vulgaris	N36
HVAEP1-G028726	Hydra vulgaris	N36
HVAEP1-G012332	Hydra vulgaris	N36
HVAEP1-G000497	Hydra vulgaris	N36
HVAEP1-G000504	Hydra vulgaris	N36
HVAEP1-G020259	Hydra vulgaris	N36
HVAEP1-G000191	Hydra vulgaris	N36
HVAEP1-G007481	Hydra vulgaris	N36
HVAEP1-G010203	Hydra vulgaris	N36
HVAEP1-G009359	Hydra vulgaris	N36
HVAEP1-G027441	Hydra vulgaris	N36
HVAEP1-G003004	Hydra vulgaris	N36
HVAEP1-G025590	Hydra vulgaris	N36
HVAEP1-G022728	Hydra vulgaris	N36
HVAEP1-G016890	Hydra vulgaris	N36
HVAEP1-G016769	Hydra vulgaris	N36
HVAEP1-G022384	Hydra vulgaris	N36
HVAEP1-G011791	Hydra vulgaris	N36
HVAEP1-G011792	Hydra vulgaris	N36
HVAEP1-G009074	Hydra vulgaris	N36
HVAEP1-G009572	Hydra vulgaris	N36
HVAEP1-G010550	Hydra vulgaris	N36
HVAEP1-G012992	Hydra vulgaris	N36
HVAEP1-G006191	Hydra vulgaris	N36
HVAEP1-G021572	Hydra vulgaris	N36
HVAEP1-G023320	Hydra vulgaris	N36
HVAEP1-G000623	Hydra vulgaris	N36
HVAEP1-G028703	Hydra vulgaris	N36
HVAEP1-G000839	Hydra vulgaris	N36
HVAEP1-G000838	Hydra vulgaris	N36
HVAEP1-G000815	Hydra vulgaris	N36
HVAEP1-G013256	Hydra vulgaris	N36
HVAEP1-G021601	Hydra vulgaris	N36
HVAEP1-G025992	Hydra vulgaris	N36
HVAEP1-G013963	Hydra vulgaris	N36
HVAEP1-G026814	Hydra vulgaris	N36
HVAEP1-G025991	Hydra vulgaris	N36
HVAEP1-G013649	Hydra vulgaris	N36
HVAEP1-G028308	Hydra vulgaris	N36
HVAEP1-G000478	Hydra vulgaris	N36
HVAEP1-G015804	Hydra vulgaris	N36
HVAEP1-G020855	Hydra vulgaris	N36
HVAEP1-G012591	Hydra vulgaris	N36
HVAEP1-G004811	Hydra vulgaris	N36
HVAEP1-G004484	Hydra vulgaris	N36
HVAEP1-G025063	Hydra vulgaris	N36
HVAEP1-G000118	Hydra vulgaris	N36
HVAEP1-G028238	Hydra vulgaris	N36
HVAEP1-G019168	Hydra vulgaris	N36
HVAEP1-G000040	Hydra vulgaris	N36
HVAEP1-G000058	Hydra vulgaris	N36
HVAEP1-G010050	Hydra vulgaris	N36
HVAEP1-G000053	Hydra vulgaris	N36
HVAEP1-G028886	Hydra vulgaris	N36
HVAEP1-G014544	Hydra vulgaris	N36
HVAEP1-G000155	Hydra vulgaris	N36
HVAEP1-G025823	Hydra vulgaris	N36
HVAEP1-G019891	Hydra vulgaris	N36
HVAEP1-G018791	Hydra vulgaris	N36
HVAEP1-G018821	Hydra vulgaris	N36
HVAEP1-G004489	Hydra vulgaris	N36
HVAEP1-G016438	Hydra vulgaris	N36
HVAEP1-G010580	Hydra vulgaris	N36
HVAEP1-G000779	Hydra vulgaris	N36
HVAEP1-G013273	Hydra vulgaris	N36
HVAEP1-G001318	Hydra vulgaris	N36
HVAEP1-G018542	Hydra vulgaris	N36
HVAEP1-G007816	Hydra vulgaris	N36
HVAEP1-G027787	Hydra vulgaris	N36
HVAEP1-G025792	Hydra vulgaris	N36
HVAEP1-G012390	Hydra vulgaris	N36
HVAEP1-G016529	Hydra vulgaris	N36
HVAEP1-G001322	Hydra vulgaris	N36
HVAEP1-G011442	Hydra vulgaris	N36
HVAEP1-G012261	Hydra vulgaris	N36
HVAEP1-G009757	Hydra vulgaris	N36
HVAEP1-G012262	Hydra vulgaris	N36
HVAEP1-G001982	Hydra vulgaris	N36
HVAEP1-G028301	Hydra vulgaris	N36
HVAEP1-G023446	Hydra vulgaris	N36
HVAEP1-G020611	Hydra vulgaris	N36
HVAEP1-G005377	Hydra vulgaris	N36
HVAEP1-G023437	Hydra vulgaris	N36
HVAEP1-G027028	Hydra vulgaris	N36
HVAEP1-G005693	Hydra vulgaris	N36
HVAEP1-G024320	Hydra vulgaris	N36
HVAEP1-G025019	Hydra vulgaris	N36
HVAEP1-G024184	Hydra vulgaris	N36
HVAEP1-G014979	Hydra vulgaris	N36
HVAEP1-G016896	Hydra vulgaris	N36
HVAEP1-G017712	Hydra vulgaris	N36
HVAEP1-G015494	Hydra vulgaris	N36
HVAEP1-G008961	Hydra vulgaris	N36
HVAEP1-G024120	Hydra vulgaris	N36
HVAEP1-G009774	Hydra vulgaris	N36
HVAEP1-G028225	Hydra vulgaris	N36
HVAEP1-G024632	Hydra vulgaris	N36
HVAEP1-G012466	Hydra vulgaris	N36
HVAEP1-G012467	Hydra vulgaris	N36
HVAEP1-G019527	Hydra vulgaris	N36
HVAEP1-G013374	Hydra vulgaris	N36
HVAEP1-G015649	Hydra vulgaris	N36
HVAEP1-G015096	Hydra vulgaris	N36
HVAEP1-G015108	Hydra vulgaris	N36
HVAEP1-G023731	Hydra vulgaris	N36
HVAEP1-G015052	Hydra vulgaris	N36
HVAEP1-G015110	Hydra vulgaris	N36
HVAEP1-G015104	Hydra vulgaris	N36
HVAEP1-G015159	Hydra vulgaris	N36
HVAEP1-G015175	Hydra vulgaris	N36
HVAEP1-G019515	Hydra vulgaris	N36
HVAEP1-G023293	Hydra vulgaris	N36
HVAEP1-G015138	Hydra vulgaris	N36
HVAEP1-G021262	Hydra vulgaris	N36
HVAEP1-G021269	Hydra vulgaris	N36
HVAEP1-G021272	Hydra vulgaris	N36
HVAEP1-G021268	Hydra vulgaris	N36
HVAEP1-G027124	Hydra vulgaris	N36
HVAEP1-G021563	Hydra vulgaris	N36
HVAEP1-G028772	Hydra vulgaris	N36
HVAEP1-G022404	Hydra vulgaris	N36
HVAEP1-G025283	Hydra vulgaris	N36
HVAEP1-G014492	Hydra vulgaris	N36
HVAEP1-G008452	Hydra vulgaris	N36
HVAEP1-G008449	Hydra vulgaris	N36
HVAEP1-G002047	Hydra vulgaris	N36
HVAEP1-G008507	Hydra vulgaris	N36
HVAEP1-G016136	Hydra vulgaris	N36
HVAEP1-G024125	Hydra vulgaris	N36
HVAEP1-G011039	Hydra vulgaris	N36
HVAEP1-G011289	Hydra vulgaris	N36
HVAEP1-G016291	Hydra vulgaris	N36
HVAEP1-G012084	Hydra vulgaris	N36
HVAEP1-G019190	Hydra vulgaris	N36
HVAEP1-G028158	Hydra vulgaris	N36
HVAEP1-G015550	Hydra vulgaris	N36
HVAEP1-G011025	Hydra vulgaris	N36
HVAEP1-G019540	Hydra vulgaris	N36
HVAEP1-G013687	Hydra vulgaris	N36
HVAEP1-G002471	Hydra vulgaris	N36
HVAEP1-G024045	Hydra vulgaris	N36
HVAEP1-G008946	Hydra vulgaris	N36
HVAEP1-G007247	Hydra vulgaris	N36
HVAEP1-G015808	Hydra vulgaris	N36
HVAEP1-G021412	Hydra vulgaris	N36
HVAEP1-G026652	Hydra vulgaris	N36
HVAEP1-G023946	Hydra vulgaris	N36
HVAEP1-G008699	Hydra vulgaris	N36
HVAEP1-G021626	Hydra vulgaris	N36
HVAEP1-G023013	Hydra vulgaris	N36
HVAEP1-G023019	Hydra vulgaris	N36
HVAEP1-G007907	Hydra vulgaris	N36
HVAEP1-G013992	Hydra vulgaris	N36
HVAEP1-G000508	Hydra vulgaris	N36
HVAEP1-G005978	Hydra vulgaris	N36
HVAEP1-G026944	Hydra vulgaris	N36
HVAEP1-G001256	Hydra vulgaris	N36
HVAEP1-G015541	Hydra vulgaris	N36
HVAEP1-G028208	Hydra vulgaris	N36
HVAEP1-G023440	Hydra vulgaris	N36
HVAEP1-G001140	Hydra vulgaris	N36
HVAEP1-G009560	Hydra vulgaris	N36
HVAEP1-G017324	Hydra vulgaris	N36
HVAEP1-G013257	Hydra vulgaris	N36
HVAEP1-G019997	Hydra vulgaris	N36
HVAEP1-G009460	Hydra vulgaris	N36
HVAEP1-G010079	Hydra vulgaris	N36
HVAEP1-G027471	Hydra vulgaris	N36
HVAEP1-G012592	Hydra vulgaris	N36
HVAEP1-G003125	Hydra vulgaris	N36
HVAEP1-G003134	Hydra vulgaris	N36
HVAEP1-G010688	Hydra vulgaris	N36
HVAEP1-G020898	Hydra vulgaris	N36
HVAEP1-G018327	Hydra vulgaris	N36
HVAEP1-G014341	Hydra vulgaris	N36
HVAEP1-G014342	Hydra vulgaris	N36
HVAEP1-G002406	Hydra vulgaris	N36
HVAEP1-G024052	Hydra vulgaris	N36
HVAEP1-G019655	Hydra vulgaris	N36
HVAEP1-G002449	Hydra vulgaris	N36
HVAEP1-G002456	Hydra vulgaris	N36
HVAEP1-G028263	Hydra vulgaris	N36
HVAEP1-G003306	Hydra vulgaris	N36
HVAEP1-G003308	Hydra vulgaris	N36
HVAEP1-G013252	Hydra vulgaris	N36
HVAEP1-G021696	Hydra vulgaris	N36
HVAEP1-G005549	Hydra vulgaris	N36
HVAEP1-G005547	Hydra vulgaris	N36
HVAEP1-G028366	Hydra vulgaris	N36
HVAEP1-G025138	Hydra vulgaris	N36
HVAEP1-G007589	Hydra vulgaris	N36
HVAEP1-G011266	Hydra vulgaris	N36
HVAEP1-G019607	Hydra vulgaris	N36
HVAEP1-G013970	Hydra vulgaris	N36
HVAEP1-G013971	Hydra vulgaris	N36
HVAEP1-G019266	Hydra vulgaris	N36
HVAEP1-G020066	Hydra vulgaris	N36
HVAEP1-G000746	Hydra vulgaris	N36
HVAEP1-G019265	Hydra vulgaris	N36
HVAEP1-G008085	Hydra vulgaris	N36
HVAEP1-G001054	Hydra vulgaris	N36
HVAEP1-G001938	Hydra vulgaris	N36
HVAEP1-G001951	Hydra vulgaris	N36
HVAEP1-G001957	Hydra vulgaris	N36
HVAEP1-G002155	Hydra vulgaris	N36
HVAEP1-G022950	Hydra vulgaris	N36
HVAEP1-G002641	Hydra vulgaris	N36
HVAEP1-G007014	Hydra vulgaris	N36
HVAEP1-G003277	Hydra vulgaris	N36
HVAEP1-G003281	Hydra vulgaris	N36
HVAEP1-G003254	Hydra vulgaris	N36
HVAEP1-G003259	Hydra vulgaris	N36
HVAEP1-G003617	Hydra vulgaris	N36
HVAEP1-G014294	Hydra vulgaris	N36
HVAEP1-G021518	Hydra vulgaris	N36
HVAEP1-G025401	Hydra vulgaris	N36
HVAEP1-G016325	Hydra vulgaris	N36
HVAEP1-G026706	Hydra vulgaris	N36
HVAEP1-G005171	Hydra vulgaris	N36
HVAEP1-G014416	Hydra vulgaris	N36
HVAEP1-G025298	Hydra vulgaris	N36
HVAEP1-G028075	Hydra vulgaris	N36
HVAEP1-G005234	Hydra vulgaris	N36
HVAEP1-G012254	Hydra vulgaris	N36
HVAEP1-G005293	Hydra vulgaris	N36
HVAEP1-G019905	Hydra vulgaris	N36
HVAEP1-G007650	Hydra vulgaris	N36
HVAEP1-G007353	Hydra vulgaris	N36
HVAEP1-G006146	Hydra vulgaris	N36
HVAEP1-G005750	Hydra vulgaris	N36
HVAEP1-G009342	Hydra vulgaris	N36
HVAEP1-G009998	Hydra vulgaris	N36
HVAEP1-G005775	Hydra vulgaris	N36
HVAEP1-G012688	Hydra vulgaris	N36
HVAEP1-G008478	Hydra vulgaris	N36
HVAEP1-G008480	Hydra vulgaris	N36
HVAEP1-G010598	Hydra vulgaris	N36
HVAEP1-G022048	Hydra vulgaris	N36
HVAEP1-G014785	Hydra vulgaris	N36
HVAEP1-G008783	Hydra vulgaris	N36
HVAEP1-G008677	Hydra vulgaris	N36
HVAEP1-G014786	Hydra vulgaris	N36
HVAEP1-G010934	Hydra vulgaris	N36
HVAEP1-G014389	Hydra vulgaris	N36
HVAEP1-G009167	Hydra vulgaris	N36
HVAEP1-G016194	Hydra vulgaris	N36
HVAEP1-G009266	Hydra vulgaris	N36
HVAEP1-G009262	Hydra vulgaris	N36
HVAEP1-G028042	Hydra vulgaris	N36
HVAEP1-G022813	Hydra vulgaris	N36
HVAEP1-G009523	Hydra vulgaris	N36
HVAEP1-G028059	Hydra vulgaris	N36
HVAEP1-G010129	Hydra vulgaris	N36
HVAEP1-G016075	Hydra vulgaris	N36
HVAEP1-G014112	Hydra vulgaris	N36
HVAEP1-G016158	Hydra vulgaris	N36
HVAEP1-G022955	Hydra vulgaris	N36
HVAEP1-G028707	Hydra vulgaris	N36
HVAEP1-G011998	Hydra vulgaris	N36
HVAEP1-G016920	Hydra vulgaris	N36
HVAEP1-G012840	Hydra vulgaris	N36
HVAEP1-G019411	Hydra vulgaris	N36
HVAEP1-G017914	Hydra vulgaris	N36
HVAEP1-G027551	Hydra vulgaris	N36
HVAEP1-G014981	Hydra vulgaris	N36
HVAEP1-G017742	Hydra vulgaris	N36
HVAEP1-G017743	Hydra vulgaris	N36
HVAEP1-G015192	Hydra vulgaris	N36
HVAEP1-G024070	Hydra vulgaris	N36
HVAEP1-G025303	Hydra vulgaris	N36
HVAEP1-G019087	Hydra vulgaris	N36
HVAEP1-G022205	Hydra vulgaris	N36
HVAEP1-G019132	Hydra vulgaris	N36
HVAEP1-G019136	Hydra vulgaris	N36
HVAEP1-G019144	Hydra vulgaris	N36
HVAEP1-G027264	Hydra vulgaris	N36
HVAEP1-G027253	Hydra vulgaris	N36
HVAEP1-G012552	Hydra vulgaris	N36
HVAEP1-G026141	Hydra vulgaris	N36
HVAEP1-G028256	Hydra vulgaris	N36
HVAEP1-G020860	Hydra vulgaris	N36
HVAEP1-G025160	Hydra vulgaris	N36
HVAEP1-G023240	Hydra vulgaris	N36
HVAEP1-G017961	Hydra vulgaris	N36
HVAEP1-G020420	Hydra vulgaris	N36
HVAEP1-G026092	Hydra vulgaris	N36
HVAEP1-G004617	Hydra vulgaris	N36
HVAEP1-G003431	Hydra vulgaris	N36
HVAEP1-G007417	Hydra vulgaris	N36
HVAEP1-G012376	Hydra vulgaris	N36
HVAEP1-G012404	Hydra vulgaris	N36
HVAEP1-G021780	Hydra vulgaris	N36
HVAEP1-G008837	Hydra vulgaris	N36
HVAEP1-G019893	Hydra vulgaris	N36
HVAEP1-G014952	Hydra vulgaris	N36
HVAEP1-G017721	Hydra vulgaris	N36
HVAEP1-G022941	Hydra vulgaris	N36
HVAEP1-G008153	Hydra vulgaris	N36
HVAEP1-G021316	Hydra vulgaris	N36
HVAEP1-G009256	Hydra vulgaris	N36
HVAEP1-G009263	Hydra vulgaris	N36
HVAEP1-G011912	Hydra vulgaris	N36
HVAEP1-G007076	Hydra vulgaris	N36
HVAEP1-G010303	Hydra vulgaris	N36
HVAEP1-G026661	Hydra vulgaris	N36
HVAEP1-G005470	Hydra vulgaris	N36
HVAEP1-G014666	Hydra vulgaris	N36
HVAEP1-G005198	Hydra vulgaris	N36
HVAEP1-G016337	Hydra vulgaris	N36
HVAEP1-G011607	Hydra vulgaris	N36
HVAEP1-G017418	Hydra vulgaris	N36
HVAEP1-G007121	Hydra vulgaris	N36
HVAEP1-G000579	Hydra vulgaris	N36
HVAEP1-G022685	Hydra vulgaris	N36
HVAEP1-G022577	Hydra vulgaris	N36
HVAEP1-G021797	Hydra vulgaris	N36
HVAEP1-G001153	Hydra vulgaris	N36
HVAEP1-G003204	Hydra vulgaris	N36
HVAEP1-G028771	Hydra vulgaris	N36
HVAEP1-G015986	Hydra vulgaris	N36
HVAEP1-G024750	Hydra vulgaris	N36
HVAEP1-G020815	Hydra vulgaris	N36
HVAEP1-G020816	Hydra vulgaris	N36
HVAEP1-G008853	Hydra vulgaris	N36
HVAEP1-G018243	Hydra vulgaris	N36
HVAEP1-G007335	Hydra vulgaris	N36
HVAEP1-G014292	Hydra vulgaris	N36
HVAEP1-G027109	Hydra vulgaris	N36
HVAEP1-G003524	Hydra vulgaris	N36
HVAEP1-G014944	Hydra vulgaris	N36
HVAEP1-G023333	Hydra vulgaris	N36
HVAEP1-G017373	Hydra vulgaris	N36
HVAEP1-G008205	Hydra vulgaris	N36
HVAEP1-G002633	Hydra vulgaris	N36
HVAEP1-G024726	Hydra vulgaris	N36
HVAEP1-G003871	Hydra vulgaris	N36
HVAEP1-G007820	Hydra vulgaris	N36
HVAEP1-G010161	Hydra vulgaris	N36
HVAEP1-G001297	Hydra vulgaris	N36
HVAEP1-G005807	Hydra vulgaris	N36
HVAEP1-G022106	Hydra vulgaris	N36
HVAEP1-G024371	Hydra vulgaris	N36
HVAEP1-G003792	Hydra vulgaris	N36
HVAEP1-G011411	Hydra vulgaris	N36
HVAEP1-G004963	Hydra vulgaris	N36
HVAEP1-G020551	Hydra vulgaris	N36
HVAEP1-G022182	Hydra vulgaris	N36
HVAEP1-G008213	Hydra vulgaris	N36
HVAEP1-G025370	Hydra vulgaris	N36
HVAEP1-G002569	Hydra vulgaris	N36
HVAEP1-G026741	Hydra vulgaris	N36
HVAEP1-G026743	Hydra vulgaris	N36
HVAEP1-G015475	Hydra vulgaris	N36
HVAEP1-G015476	Hydra vulgaris	N36
HVAEP1-G015125	Hydra vulgaris	N36
HVAEP1-G021745	Hydra vulgaris	N36
HVAEP1-G006417	Hydra vulgaris	N36
HVAEP1-G001370	Hydra vulgaris	N36
HVAEP1-G018008	Hydra vulgaris	N36
HVAEP1-G016992	Hydra vulgaris	N36
HVAEP1-G027525	Hydra vulgaris	N36
HVAEP1-G020273	Hydra vulgaris	N36
HVAEP1-G007291	Hydra vulgaris	N36
HVAEP1-G006451	Hydra vulgaris	N36
HVAEP1-G022107	Hydra vulgaris	N36
HVAEP1-G004492	Hydra vulgaris	N36
HVAEP1-G004752	Hydra vulgaris	N36
HVAEP1-G012193	Hydra vulgaris	N36
HVAEP1-G013889	Hydra vulgaris	N36
HVAEP1-G005573	Hydra vulgaris	N36
HVAEP1-G001044	Hydra vulgaris	N36
HVAEP1-G028436	Hydra vulgaris	N36
HVAEP1-G023629	Hydra vulgaris	N36
HVAEP1-G003001	Hydra vulgaris	N36
HVAEP1-G017140	Hydra vulgaris	N36
HVAEP1-G013052	Hydra vulgaris	N36
HVAEP1-G006393	Hydra vulgaris	N36
HVAEP1-G026576	Hydra vulgaris	N36
HVAEP1-G010235	Hydra vulgaris	N36
HVAEP1-G010237	Hydra vulgaris	N36
HVAEP1-G012802	Hydra vulgaris	N36
HVAEP1-G023178	Hydra vulgaris	N36
HVAEP1-G010162	Hydra vulgaris	N36
HVAEP1-G003258	Hydra vulgaris	N36
HVAEP1-G003285	Hydra vulgaris	N36
HVAEP1-G015133	Hydra vulgaris	N36
HVAEP1-G020211	Hydra vulgaris	N36
HVAEP1-G020609	Hydra vulgaris	N36
HVAEP1-G009356	Hydra vulgaris	N36
HVAEP1-G027418	Hydra vulgaris	N36
HVAEP1-G009298	Hydra vulgaris	N36
HVAEP1-G005847	Hydra vulgaris	N36
HVAEP1-G025315	Hydra vulgaris	N36
HVAEP1-G005551	Hydra vulgaris	N36
HVAEP1-G002118	Hydra vulgaris	N36
HVAEP1-G002115	Hydra vulgaris	N36
HVAEP1-G005200	Hydra vulgaris	N36
HVAEP1-G022503	Hydra vulgaris	N36
HVAEP1-G026808	Hydra vulgaris	N36
HVAEP1-G026815	Hydra vulgaris	N36
HVAEP1-G025028	Hydra vulgaris	N36
HVAEP1-G028709	Hydra vulgaris	N36
HVAEP1-G005676	Hydra vulgaris	N36
HVAEP1-G007522	Hydra vulgaris	N36
HVAEP1-G016001	Hydra vulgaris	N36
HVAEP1-G014349	Hydra vulgaris	N36
HVAEP1-G019248	Hydra vulgaris	N36
HVAEP1-G004299	Hydra vulgaris	N36
HVAEP1-G015686	Hydra vulgaris	N36
HVAEP1-G016170	Hydra vulgaris	N36
HVAEP1-G000291	Hydra vulgaris	N36
HVAEP1-G000220	Hydra vulgaris	N36
HVAEP1-G000156	Hydra vulgaris	N36
HVAEP1-G018864	Hydra vulgaris	N36
HVAEP1-G000166	Hydra vulgaris	N36
HVAEP1-G010197	Hydra vulgaris	N36
HVAEP1-G000226	Hydra vulgaris	N36
HVAEP1-G000225	Hydra vulgaris	N36
HVAEP1-G000606	Hydra vulgaris	N36
HVAEP1-G000251	Hydra vulgaris	N36
HVAEP1-G027537	Hydra vulgaris	N36
HVAEP1-G000413	Hydra vulgaris	N36
HVAEP1-G005969	Hydra vulgaris	N36
HVAEP1-G009275	Hydra vulgaris	N36
HVAEP1-G026176	Hydra vulgaris	N36
HVAEP1-G000738	Hydra vulgaris	N36
HVAEP1-G000833	Hydra vulgaris	N36
HVAEP1-G000834	Hydra vulgaris	N36
HVAEP1-G000810	Hydra vulgaris	N36
HVAEP1-G024468	Hydra vulgaris	N36
HVAEP1-G001015	Hydra vulgaris	N36
HVAEP1-G027838	Hydra vulgaris	N36
HVAEP1-G002794	Hydra vulgaris	N36
HVAEP1-G001016	Hydra vulgaris	N36
HVAEP1-G021706	Hydra vulgaris	N36
HVAEP1-G001183	Hydra vulgaris	N36
HVAEP1-G017325	Hydra vulgaris	N36
HVAEP1-G005375	Hydra vulgaris	N36
HVAEP1-G001226	Hydra vulgaris	N36
HVAEP1-G007224	Hydra vulgaris	N36
HVAEP1-G001222	Hydra vulgaris	N36
HVAEP1-G001477	Hydra vulgaris	N36
HVAEP1-G017583	Hydra vulgaris	N36
HVAEP1-G010315	Hydra vulgaris	N36
HVAEP1-G026862	Hydra vulgaris	N36
HVAEP1-G001638	Hydra vulgaris	N36
HVAEP1-G001659	Hydra vulgaris	N36
HVAEP1-G001666	Hydra vulgaris	N36
HVAEP1-G001662	Hydra vulgaris	N36
HVAEP1-G004628	Hydra vulgaris	N36
HVAEP1-G004629	Hydra vulgaris	N36
HVAEP1-G001925	Hydra vulgaris	N36
HVAEP1-G002193	Hydra vulgaris	N36
HVAEP1-G002192	Hydra vulgaris	N36
HVAEP1-G002189	Hydra vulgaris	N36
HVAEP1-G002256	Hydra vulgaris	N36
HVAEP1-G007272	Hydra vulgaris	N36
HVAEP1-G011964	Hydra vulgaris	N36
HVAEP1-G002687	Hydra vulgaris	N36
HVAEP1-G002688	Hydra vulgaris	N36
HVAEP1-G002742	Hydra vulgaris	N36
HVAEP1-G002862	Hydra vulgaris	N36
HVAEP1-G015206	Hydra vulgaris	N36
HVAEP1-G003140	Hydra vulgaris	N36
HVAEP1-G015205	Hydra vulgaris	N36
HVAEP1-G003282	Hydra vulgaris	N36
HVAEP1-G003248	Hydra vulgaris	N36
HVAEP1-G003252	Hydra vulgaris	N36
HVAEP1-G012060	Hydra vulgaris	N36
HVAEP1-G022465	Hydra vulgaris	N36
HVAEP1-G003863	Hydra vulgaris	N36
HVAEP1-G004706	Hydra vulgaris	N36
HVAEP1-G007441	Hydra vulgaris	N36
HVAEP1-G014846	Hydra vulgaris	N36
HVAEP1-G022476	Hydra vulgaris	N36
HVAEP1-G022473	Hydra vulgaris	N36
HVAEP1-G004747	Hydra vulgaris	N36
HVAEP1-G026800	Hydra vulgaris	N36
HVAEP1-G005109	Hydra vulgaris	N36
HVAEP1-G026817	Hydra vulgaris	N36
HVAEP1-G005394	Hydra vulgaris	N36
HVAEP1-G006022	Hydra vulgaris	N36
HVAEP1-G017188	Hydra vulgaris	N36
HVAEP1-G005808	Hydra vulgaris	N36
HVAEP1-G012354	Hydra vulgaris	N36
HVAEP1-G009807	Hydra vulgaris	N36
HVAEP1-G024570	Hydra vulgaris	N36
HVAEP1-G006590	Hydra vulgaris	N36
HVAEP1-G008348	Hydra vulgaris	N36
HVAEP1-G007314	Hydra vulgaris	N36
HVAEP1-G023968	Hydra vulgaris	N36
HVAEP1-G023973	Hydra vulgaris	N36
HVAEP1-G011041	Hydra vulgaris	N36
HVAEP1-G028245	Hydra vulgaris	N36
HVAEP1-G007898	Hydra vulgaris	N36
HVAEP1-G007996	Hydra vulgaris	N36
HVAEP1-G027384	Hydra vulgaris	N36
HVAEP1-G009733	Hydra vulgaris	N36
HVAEP1-G009732	Hydra vulgaris	N36
HVAEP1-G012553	Hydra vulgaris	N36
HVAEP1-G022602	Hydra vulgaris	N36
HVAEP1-G010068	Hydra vulgaris	N36
HVAEP1-G022574	Hydra vulgaris	N36
HVAEP1-G010327	Hydra vulgaris	N36
HVAEP1-G012379	Hydra vulgaris	N36
HVAEP1-G010836	Hydra vulgaris	N36
HVAEP1-G011921	Hydra vulgaris	N36
HVAEP1-G027812	Hydra vulgaris	N36
HVAEP1-G026714	Hydra vulgaris	N36
HVAEP1-G026718	Hydra vulgaris	N36
HVAEP1-G010953	Hydra vulgaris	N36
HVAEP1-G025265	Hydra vulgaris	N36
HVAEP1-G011258	Hydra vulgaris	N36
HVAEP1-G011796	Hydra vulgaris	N36
HVAEP1-G011795	Hydra vulgaris	N36
HVAEP1-G022434	Hydra vulgaris	N36
HVAEP1-G011825	Hydra vulgaris	N36
HVAEP1-G011959	Hydra vulgaris	N36
HVAEP1-G011939	Hydra vulgaris	N36
HVAEP1-G012142	Hydra vulgaris	N36
HVAEP1-G026338	Hydra vulgaris	N36
HVAEP1-G027025	Hydra vulgaris	N36
HVAEP1-G012393	Hydra vulgaris	N36
HVAEP1-G012383	Hydra vulgaris	N36
HVAEP1-G012382	Hydra vulgaris	N36
HVAEP1-G016071	Hydra vulgaris	N36
HVAEP1-G013311	Hydra vulgaris	N36
HVAEP1-G013353	Hydra vulgaris	N36
HVAEP1-G013352	Hydra vulgaris	N36
HVAEP1-G015230	Hydra vulgaris	N36
HVAEP1-G014041	Hydra vulgaris	N36
HVAEP1-G021975	Hydra vulgaris	N36
HVAEP1-G014485	Hydra vulgaris	N36
HVAEP1-G022238	Hydra vulgaris	N36
HVAEP1-G015897	Hydra vulgaris	N36
HVAEP1-G020589	Hydra vulgaris	N36
HVAEP1-G014980	Hydra vulgaris	N36
HVAEP1-G019531	Hydra vulgaris	N36
HVAEP1-G019487	Hydra vulgaris	N36
HVAEP1-G014994	Hydra vulgaris	N36
HVAEP1-G015023	Hydra vulgaris	N36
HVAEP1-G021273	Hydra vulgaris	N36
HVAEP1-G021261	Hydra vulgaris	N36
HVAEP1-G015219	Hydra vulgaris	N36
HVAEP1-G018343	Hydra vulgaris	N36
HVAEP1-G015218	Hydra vulgaris	N36
HVAEP1-G020428	Hydra vulgaris	N36
HVAEP1-G020434	Hydra vulgaris	N36
HVAEP1-G020876	Hydra vulgaris	N36
HVAEP1-G022537	Hydra vulgaris	N36
HVAEP1-G023248	Hydra vulgaris	N36
HVAEP1-G021267	Hydra vulgaris	N36
HVAEP1-G021271	Hydra vulgaris	N36
HVAEP1-G021263	Hydra vulgaris	N36
HVAEP1-G024099	Hydra vulgaris	N36
HVAEP1-G027138	Hydra vulgaris	N36
HVAEP1-G027191	Hydra vulgaris	N36
HVAEP1-G003232	Hydra vulgaris	N36
HVAEP1-G017778	Hydra vulgaris	N36
HVAEP1-G025835	Hydra vulgaris	N36
HVAEP1-G005587	Hydra vulgaris	N36
HVAEP1-G010148	Hydra vulgaris	N36
HVAEP1-G009735	Hydra vulgaris	N36
HVAEP1-G013026	Hydra vulgaris	N36
HVAEP1-G018489	Hydra vulgaris	N36
HVAEP1-G009901	Hydra vulgaris	N36
HVAEP1-G013880	Hydra vulgaris	N36
HVAEP1-G022571	Hydra vulgaris	N36
HVAEP1-G010113	Hydra vulgaris	N36
HVAEP1-G027129	Hydra vulgaris	N36
HVAEP1-G027131	Hydra vulgaris	N36
HVAEP1-G027135	Hydra vulgaris	N36
HVAEP1-G017898	Hydra vulgaris	N36
HVAEP1-G016898	Hydra vulgaris	N36
HVAEP1-G022940	Hydra vulgaris	N36
HVAEP1-G002255	Hydra vulgaris	N36
HVAEP1-G022979	Hydra vulgaris	N36
HVAEP1-G023386	Hydra vulgaris	N36
HVAEP1-G004217	Hydra vulgaris	N36
HVAEP1-G005150	Hydra vulgaris	N36
HVAEP1-G018347	Hydra vulgaris	N36
HVAEP1-G009593	Hydra vulgaris	N36
HVAEP1-G022370	Hydra vulgaris	N36
HVAEP1-G010077	Hydra vulgaris	N36
HVAEP1-G010081	Hydra vulgaris	N36
HVAEP1-G015558	Hydra vulgaris	N36
HVAEP1-G019150	Hydra vulgaris	N36
HVAEP1-G016464	Hydra vulgaris	N36
HVAEP1-G018101	Hydra vulgaris	N36
HVAEP1-G028758	Hydra vulgaris	N36
HVAEP1-G018562	Hydra vulgaris	N36
HVAEP1-G026162	Hydra vulgaris	N36
HVAEP1-G016988	Hydra vulgaris	N36
HVAEP1-G027853	Hydra vulgaris	N36
HVAEP1-G010243	Hydra vulgaris	N36
HVAEP1-G022502	Hydra vulgaris	N36
HVAEP1-G013642	Hydra vulgaris	N36
HVAEP1-G017341	Hydra vulgaris	N36
HVAEP1-G010757	Hydra vulgaris	N36
HVAEP1-G017530	Hydra vulgaris	N36
HVAEP1-G020684	Hydra vulgaris	N36
HVAEP1-G020473	Hydra vulgaris	N36
HVAEP1-G010549	Hydra vulgaris	N36
HVAEP1-G011775	Hydra vulgaris	N36
HVAEP1-G022843	Hydra vulgaris	N36
HVAEP1-G000761	Hydra vulgaris	N36
HVAEP1-G013289	Hydra vulgaris	N36
HVAEP1-G014651	Hydra vulgaris	N36
HVAEP1-G007947	Hydra vulgaris	N36
HVAEP1-G004766	Hydra vulgaris	N36
HVAEP1-G022868	Hydra vulgaris	N36
HVAEP1-G011567	Hydra vulgaris	N36
HVAEP1-G025266	Hydra vulgaris	N36
HVAEP1-G022340	Hydra vulgaris	N36
HVAEP1-G016644	Hydra vulgaris	N36
HVAEP1-G016645	Hydra vulgaris	N36
HVAEP1-G024270	Hydra vulgaris	N36
HVAEP1-G000947	Hydra vulgaris	N36
HVAEP1-G007146	Hydra vulgaris	N36
HVAEP1-G025887	Hydra vulgaris	N36
HVAEP1-G023509	Hydra vulgaris	N36
HVAEP1-G002671	Hydra vulgaris	N36
HVAEP1-G016035	Hydra vulgaris	N36
HVAEP1-G026756	Hydra vulgaris	N36
HVAEP1-G005035	Hydra vulgaris	N36
HVAEP1-G019670	Hydra vulgaris	N36
HVAEP1-G024195	Hydra vulgaris	N36
HVAEP1-G017567	Hydra vulgaris	N36
HVAEP1-G006355	Hydra vulgaris	N36
HVAEP1-G006656	Hydra vulgaris	N36
HVAEP1-G027127	Hydra vulgaris	N36
HVAEP1-G006577	Hydra vulgaris	N36
HVAEP1-G009180	Hydra vulgaris	N36
HVAEP1-G001163	Hydra vulgaris	N36
HVAEP1-G012803	Hydra vulgaris	N36
HVAEP1-G026455	Hydra vulgaris	N36
HVAEP1-G023979	Hydra vulgaris	N36
HVAEP1-G018341	Hydra vulgaris	N36
HVAEP1-G002390	Hydra vulgaris	N36
HVAEP1-G027292	Hydra vulgaris	N36
HVAEP1-G017243	Hydra vulgaris	N36
HVAEP1-G012582	Hydra vulgaris	N36
HVAEP1-G002290	Hydra vulgaris	N36
HVAEP1-G026699	Hydra vulgaris	N36
HVAEP1-G020395	Hydra vulgaris	N36
HVAEP1-G019468	Hydra vulgaris	N36
HVAEP1-G002718	Hydra vulgaris	N36
HVAEP1-G012027	Hydra vulgaris	N36
HVAEP1-G024482	Hydra vulgaris	N36
HVAEP1-G011329	Hydra vulgaris	N36
HVAEP1-G009881	Hydra vulgaris	N36
HVAEP1-G025510	Hydra vulgaris	N36
HVAEP1-G026907	Hydra vulgaris	N36
HVAEP1-G009190	Hydra vulgaris	N36
HVAEP1-G011966	Hydra vulgaris	N36
HVAEP1-G012860	Hydra vulgaris	N36
HVAEP1-G013930	Hydra vulgaris	N36
HVAEP1-G010093	Hydra vulgaris	N36
HVAEP1-G015733	Hydra vulgaris	N36
HVAEP1-G015753	Hydra vulgaris	N36
HVAEP1-G005980	Hydra vulgaris	N36
HVAEP1-G006738	Hydra vulgaris	N36
HVAEP1-G007315	Hydra vulgaris	N36
HVAEP1-G013268	Hydra vulgaris	N36
HVAEP1-G000667	Hydra vulgaris	N36
HVAEP1-G015980	Hydra vulgaris	N36
HVAEP1-G008630	Hydra vulgaris	N36
HVAEP1-G015664	Hydra vulgaris	N36
HVAEP1-G017129	Hydra vulgaris	N36
HVAEP1-G024126	Hydra vulgaris	N36
HVAEP1-G005725	Hydra vulgaris	N36
HVAEP1-G024219	Hydra vulgaris	N36
HVAEP1-G010328	Hydra vulgaris	N36
HVAEP1-G009422	Hydra vulgaris	N36
HVAEP1-G004634	Hydra vulgaris	N36
HVAEP1-G025837	Hydra vulgaris	N36
HVAEP1-G024564	Hydra vulgaris	N36
HVAEP1-G009308	Hydra vulgaris	N36
HVAEP1-G002806	Hydra vulgaris	N36
HVAEP1-G003903	Hydra vulgaris	N36
HVAEP1-G006192	Hydra vulgaris	N36
HVAEP1-G019331	Hydra vulgaris	N36
HVAEP1-G006922	Hydra vulgaris	N36
HVAEP1-G022209	Hydra vulgaris	N36
HVAEP1-G016006	Hydra vulgaris	N36
HVAEP1-G028732	Hydra vulgaris	N36
HVAEP1-G010893	Hydra vulgaris	N36
HVAEP1-G028661	Hydra vulgaris	N36
HVAEP1-G007285	Hydra vulgaris	N36
HVAEP1-G002048	Hydra vulgaris	N36
HVAEP1-G000209	Hydra vulgaris	N36
HVAEP1-G011615	Hydra vulgaris	N36
HVAEP1-G000389	Hydra vulgaris	N36
HVAEP1-G000460	Hydra vulgaris	N36
HVAEP1-G000622	Hydra vulgaris	N36
HVAEP1-G023322	Hydra vulgaris	N36
HVAEP1-G001373	Hydra vulgaris	N36
HVAEP1-G002102	Hydra vulgaris	N36
HVAEP1-G003275	Hydra vulgaris	N36
HVAEP1-G002210	Hydra vulgaris	N36
HVAEP1-G002719	Hydra vulgaris	N36
HVAEP1-G002771	Hydra vulgaris	N36
HVAEP1-G026127	Hydra vulgaris	N36
HVAEP1-G002830	Hydra vulgaris	N36
HVAEP1-G023630	Hydra vulgaris	N36
HVAEP1-G003002	Hydra vulgaris	N36
HVAEP1-G003050	Hydra vulgaris	N36
HVAEP1-G003106	Hydra vulgaris	N36
HVAEP1-G003060	Hydra vulgaris	N36
HVAEP1-G003168	Hydra vulgaris	N36
HVAEP1-G003187	Hydra vulgaris	N36
HVAEP1-G007997	Hydra vulgaris	N36
HVAEP1-G003257	Hydra vulgaris	N36
HVAEP1-G003265	Hydra vulgaris	N36
HVAEP1-G003279	Hydra vulgaris	N36
HVAEP1-G019640	Hydra vulgaris	N36
HVAEP1-G003289	Hydra vulgaris	N36
HVAEP1-G003283	Hydra vulgaris	N36
HVAEP1-G003624	Hydra vulgaris	N36
HVAEP1-G009784	Hydra vulgaris	N36
HVAEP1-G003690	Hydra vulgaris	N36
HVAEP1-G004098	Hydra vulgaris	N36
HVAEP1-G011902	Hydra vulgaris	N36
HVAEP1-G004669	Hydra vulgaris	N36
HVAEP1-G004662	Hydra vulgaris	N36
HVAEP1-G015740	Hydra vulgaris	N36
HVAEP1-G004906	Hydra vulgaris	N36
HVAEP1-G005034	Hydra vulgaris	N36
HVAEP1-G005115	Hydra vulgaris	N36
HVAEP1-G010439	Hydra vulgaris	N36
HVAEP1-G005369	Hydra vulgaris	N36
HVAEP1-G010169	Hydra vulgaris	N36
HVAEP1-G005424	Hydra vulgaris	N36
HVAEP1-G005422	Hydra vulgaris	N36
HVAEP1-G005701	Hydra vulgaris	N36
HVAEP1-G006150	Hydra vulgaris	N36
HVAEP1-G006436	Hydra vulgaris	N36
HVAEP1-G017360	Hydra vulgaris	N36
HVAEP1-G015752	Hydra vulgaris	N36
HVAEP1-G006545	Hydra vulgaris	N36
HVAEP1-G006860	Hydra vulgaris	N36
HVAEP1-G025790	Hydra vulgaris	N36
HVAEP1-G007171	Hydra vulgaris	N36
HVAEP1-G007245	Hydra vulgaris	N36
HVAEP1-G015551	Hydra vulgaris	N36
HVAEP1-G007320	Hydra vulgaris	N36
HVAEP1-G023974	Hydra vulgaris	N36
HVAEP1-G007366	Hydra vulgaris	N36
HVAEP1-G009013	Hydra vulgaris	N36
HVAEP1-G007475	Hydra vulgaris	N36
HVAEP1-G007740	Hydra vulgaris	N36
HVAEP1-G018854	Hydra vulgaris	N36
HVAEP1-G007861	Hydra vulgaris	N36
HVAEP1-G007852	Hydra vulgaris	N36
HVAEP1-G007956	Hydra vulgaris	N36
HVAEP1-G008061	Hydra vulgaris	N36
HVAEP1-G008062	Hydra vulgaris	N36
HVAEP1-G008099	Hydra vulgaris	N36
HVAEP1-G024825	Hydra vulgaris	N36
HVAEP1-G010034	Hydra vulgaris	N36
HVAEP1-G008508	Hydra vulgaris	N36
HVAEP1-G008534	Hydra vulgaris	N36
HVAEP1-G010701	Hydra vulgaris	N36
HVAEP1-G008877	Hydra vulgaris	N36
HVAEP1-G017482	Hydra vulgaris	N36
HVAEP1-G022204	Hydra vulgaris	N36
HVAEP1-G009038	Hydra vulgaris	N36
HVAEP1-G010971	Hydra vulgaris	N36
HVAEP1-G009154	Hydra vulgaris	N36
HVAEP1-G009258	Hydra vulgaris	N36
HVAEP1-G009315	Hydra vulgaris	N36
HVAEP1-G009627	Hydra vulgaris	N36
HVAEP1-G009672	Hydra vulgaris	N36
HVAEP1-G009676	Hydra vulgaris	N36
HVAEP1-G009673	Hydra vulgaris	N36
HVAEP1-G009677	Hydra vulgaris	N36
HVAEP1-G009674	Hydra vulgaris	N36
HVAEP1-G009678	Hydra vulgaris	N36
HVAEP1-G017275	Hydra vulgaris	N36
HVAEP1-G010345	Hydra vulgaris	N36
HVAEP1-G018802	Hydra vulgaris	N36
HVAEP1-G010633	Hydra vulgaris	N36
HVAEP1-G013202	Hydra vulgaris	N36
HVAEP1-G010739	Hydra vulgaris	N36
HVAEP1-G010948	Hydra vulgaris	N36
HVAEP1-G010939	Hydra vulgaris	N36
HVAEP1-G011109	Hydra vulgaris	N36
HVAEP1-G011147	Hydra vulgaris	N36
HVAEP1-G014750	Hydra vulgaris	N36
HVAEP1-G011303	Hydra vulgaris	N36
HVAEP1-G011394	Hydra vulgaris	N36
HVAEP1-G012120	Hydra vulgaris	N36
HVAEP1-G020674	Hydra vulgaris	N36
HVAEP1-G012226	Hydra vulgaris	N36
HVAEP1-G012241	Hydra vulgaris	N36
HVAEP1-G012402	Hydra vulgaris	N36
HVAEP1-G024206	Hydra vulgaris	N36
HVAEP1-G023263	Hydra vulgaris	N36
HVAEP1-G012452	Hydra vulgaris	N36
HVAEP1-G012887	Hydra vulgaris	N36
HVAEP1-G025136	Hydra vulgaris	N36
HVAEP1-G013406	Hydra vulgaris	N36
HVAEP1-G013312	Hydra vulgaris	N36
HVAEP1-G013573	Hydra vulgaris	N36
HVAEP1-G013586	Hydra vulgaris	N36
HVAEP1-G028235	Hydra vulgaris	N36
HVAEP1-G013641	Hydra vulgaris	N36
HVAEP1-G013709	Hydra vulgaris	N36
HVAEP1-G013708	Hydra vulgaris	N36
HVAEP1-G013804	Hydra vulgaris	N36
HVAEP1-G014156	Hydra vulgaris	N36
HVAEP1-G014338	Hydra vulgaris	N36
HVAEP1-G014387	Hydra vulgaris	N36
HVAEP1-G014461	Hydra vulgaris	N36
HVAEP1-G014462	Hydra vulgaris	N36
HVAEP1-G014751	Hydra vulgaris	N36
HVAEP1-G015851	Hydra vulgaris	N36
HVAEP1-G015115	Hydra vulgaris	N36
HVAEP1-G015208	Hydra vulgaris	N36
HVAEP1-G015185	Hydra vulgaris	N36
HVAEP1-G015204	Hydra vulgaris	N36
HVAEP1-G015229	Hydra vulgaris	N36
HVAEP1-G020981	Hydra vulgaris	N36
HVAEP1-G016484	Hydra vulgaris	N36
HVAEP1-G016754	Hydra vulgaris	N36
HVAEP1-G028589	Hydra vulgaris	N36
HVAEP1-G021052	Hydra vulgaris	N36
HVAEP1-G016859	Hydra vulgaris	N36
HVAEP1-G016909	Hydra vulgaris	N36
HVAEP1-G017002	Hydra vulgaris	N36
HVAEP1-G022609	Hydra vulgaris	N36
HVAEP1-G017196	Hydra vulgaris	N36
HVAEP1-G017020	Hydra vulgaris	N36
HVAEP1-G025525	Hydra vulgaris	N36
HVAEP1-G017307	Hydra vulgaris	N36
HVAEP1-G017386	Hydra vulgaris	N36
HVAEP1-G017390	Hydra vulgaris	N36
HVAEP1-G017559	Hydra vulgaris	N36
HVAEP1-G019187	Hydra vulgaris	N36
HVAEP1-G017788	Hydra vulgaris	N36
HVAEP1-G017911	Hydra vulgaris	N36
HVAEP1-G022060	Hydra vulgaris	N36
HVAEP1-G017969	Hydra vulgaris	N36
HVAEP1-G018013	Hydra vulgaris	N36
HVAEP1-G018058	Hydra vulgaris	N36
HVAEP1-G018588	Hydra vulgaris	N36
HVAEP1-G018884	Hydra vulgaris	N36
HVAEP1-G019046	Hydra vulgaris	N36
HVAEP1-G019253	Hydra vulgaris	N36
HVAEP1-G023681	Hydra vulgaris	N36
HVAEP1-G019312	Hydra vulgaris	N36
HVAEP1-G025796	Hydra vulgaris	N36
HVAEP1-G020140	Hydra vulgaris	N36
HVAEP1-G019632	Hydra vulgaris	N36
HVAEP1-G027016	Hydra vulgaris	N36
HVAEP1-G020366	Hydra vulgaris	N36
HVAEP1-G020414	Hydra vulgaris	N36
HVAEP1-G020578	Hydra vulgaris	N36
HVAEP1-G020803	Hydra vulgaris	N36
HVAEP1-G021044	Hydra vulgaris	N36
HVAEP1-G021682	Hydra vulgaris	N36
HVAEP1-G021811	Hydra vulgaris	N36
HVAEP1-G022131	Hydra vulgaris	N36
HVAEP1-G022622	Hydra vulgaris	N36
HVAEP1-G023154	Hydra vulgaris	N36
HVAEP1-G023297	Hydra vulgaris	N36
HVAEP1-G023349	Hydra vulgaris	N36
HVAEP1-G023636	Hydra vulgaris	N36
HVAEP1-G024337	Hydra vulgaris	N36
HVAEP1-G024759	Hydra vulgaris	N36
HVAEP1-G025770	Hydra vulgaris	N36
HVAEP1-G025773	Hydra vulgaris	N36
HVAEP1-G027806	Hydra vulgaris	N36
HVAEP1-G025900	Hydra vulgaris	N36
HVAEP1-G025972	Hydra vulgaris	N36
HVAEP1-G026002	Hydra vulgaris	N36
HVAEP1-G025995	Hydra vulgaris	N36
HVAEP1-G025996	Hydra vulgaris	N36
HVAEP1-G026183	Hydra vulgaris	N36
HVAEP1-G027826	Hydra vulgaris	N36
HVAEP1-G028164	Hydra vulgaris	N36
HVAEP1-G028203	Hydra vulgaris	N36
HVAEP1-G028292	Hydra vulgaris	N36
HVAEP1-G028842	Hydra vulgaris	N36
HVAEP1-G028689	Hydra vulgaris	N36
HVAEP1-G003876	Hydra vulgaris + Hydra oligactis	N33
HVAEP1-G003156	Hydra vulgaris + Hydra oligactis	N33
HVAEP1-G003123	Hydra vulgaris + Hydra oligactis	N33
HVAEP1-G003091	Hydra vulgaris + Hydra oligactis	N33
HVAEP1-G009223	Hydra vulgaris + Hydra oligactis	N33
HVAEP1-G023045	Hydra vulgaris + Hydra oligactis	N33
HVAEP1-G028179	Hydra vulgaris + Hydra oligactis	N33
HVAEP1-G026716	Hydra vulgaris + Hydra oligactis	N33
HVAEP1-G014469	Hydra vulgaris + Hydra oligactis	N33
HVAEP1-G018955	Hydra vulgaris + Hydra oligactis	N33
HVAEP1-G024425	Hydra vulgaris + Hydra oligactis	N33
HVAEP1-G011012	Hydra vulgaris + Hydra oligactis	N33
HVAEP1-G020673	Hydra vulgaris + Hydra oligactis	N33
HVAEP1-G015197	Hydra vulgaris + Hydra oligactis	N33
HVAEP1-G002213	Hydra vulgaris + Hydra oligactis	N33
HVAEP1-G010229	Hydra vulgaris + Hydra oligactis	N33
HVAEP1-G011434	Hydra vulgaris + Hydra oligactis	N33
HVAEP1-G015200	Hydra vulgaris + Hydra oligactis	N33
HVAEP1-G008991	Hydra vulgaris + Hydra oligactis	N33
HVAEP1-G010300	Hydra vulgaris + Hydra oligactis	N33
HVAEP1-G004060	Hydra vulgaris + Hydra oligactis	N33
HVAEP1-G016775	Hydra vulgaris + Hydra oligactis	N33
HVAEP1-G027571	Hydra vulgaris + Hydra oligactis	N33
HVAEP1-G022760	Hydra vulgaris + Hydra oligactis	N33
HVAEP1-G008082	Hydra vulgaris + Hydra oligactis	N33
HVAEP1-G001984	Hydra vulgaris + Hydra oligactis	N33
HVAEP1-G025986	Hydra vulgaris + Hydra oligactis	N33
HVAEP1-G024366	Hydra vulgaris + Hydra oligactis	N33
HVAEP1-G024569	Hydra vulgaris + Hydra oligactis	N33
HVAEP1-G003132	Hydra vulgaris + Hydra oligactis	N33
HVAEP1-G020408	Hydra vulgaris + Hydra oligactis	N33
HVAEP1-G002629	Hydra vulgaris + Hydra oligactis	N33
HVAEP1-G015779	Hydra vulgaris + Hydra oligactis	N33
HVAEP1-G023688	Hydra vulgaris + Hydra oligactis	N33
HVAEP1-G007494	Hydra vulgaris + Hydra oligactis	N33
HVAEP1-G003139	Hydra vulgaris + Hydra oligactis	N33
HVAEP1-G025987	Hydra vulgaris + Hydra oligactis	N33
HVAEP1-G027087	Hydra vulgaris + Hydra oligactis	N33
HVAEP1-G027531	Hydra vulgaris + Hydra oligactis	N33
HVAEP1-G010434	Hydra vulgaris + Hydra oligactis	N33
HVAEP1-G015116	Hydra vulgaris + Hydra oligactis	N33
HVAEP1-G003189	Hydra vulgaris + Hydra oligactis	N33
HVAEP1-G019363	Hydra vulgaris + Hydra oligactis	N33
HVAEP1-G015533	Hydra vulgaris + Hydra oligactis	N33
HVAEP1-G023992	Hydra vulgaris + Hydra oligactis	N33
[truncated: 26,372 more rows]

## Sheet: Legend
Supplemental Data S11. Excel workbook containing the phylostratigraphically estimated age for all Hydra genes that were assigned to an orthogroup in our OrthoFinder analysis. The table includes the gene model ID (“Hydra Gene ID”), the most ancient clade that contained all predicted orthologs of that gene (“Clade of Origin”), and the orthofinder-assigned node ID for the clade of origin (“Orthofind…
