# Supplementary material for: A chromosome-scale epigenetic map of the Hydra genome reveals conserved regulators of cell state
Source: HighWire-hosted journal article supplement (doi:10.1101/gr.277040.122), 2023-01-13
Supplement: Supplemental_Data_S17.xlsx [file Supplemental_Data_S17.xlsx]

## Sheet: sDoc9_crossSpecExpCor
Hydra Gene ID	Clytia Gene ID	Correlation Score	Bilaterian Ortholog	Bilaterian Ortholog Ensembl ID	Bilaterian Ortholog Long Name	Hydra GenBank Match
HVAEP1-G006077	asmbl_35017	0.97574	ARRDC2, ARRDC3, TXNIP, ARRDC4	ENSG00000105643, ENSG00000113369, ENSG00000265972, ENSG00000140450	arrestin domain containing 3, arrestin domain containing 4, arrestin domain containing 2, thioredoxin interacting protein	NA
HVAEP1-G023780	asmbl_41445	0.97478	M3, clos	FBgn0005390, FBgn0261016	NA	NA
HVAEP1-G001459	asmbl_27553	0.969916	NA	NA	NA	NA
HVAEP1-G012944	asmbl_25479	0.966988	NA	NA	NA	NA
HVAEP1-G020920	asmbl_66100	0.965001	NA	NA	NA	NA
HVAEP1-G014930	asmbl_83487	0.964637	SPSB3	ENSG00000162032	splA/ryanodine receptor domain and SOCS box containing 3	NA
HVAEP1-G021084	asmbl_78387	0.964534	NA	NA	NA	NA
HVAEP1-G010255	asmbl_49613	0.962752	NA	NA	NA	NA
HVAEP1-G006206	asmbl_74545	0.962609	NA	NA	NA	NA
HVAEP1-G019589	asmbl_13787	0.962478	NA	NA	NA	NA
HVAEP1-G026990	asmbl_75619	0.957022	NA	NA	NA	NA
HVAEP1-G015720	asmbl_36637	0.955194	M3, clos	FBgn0005390, FBgn0261016	NA	NA
HVAEP1-G020692	asmbl_74674	0.954318	NA	NA	NA	NA
HVAEP1-G019779	asmbl_40738	0.948535	NA	NA	NA	NA
HVAEP1-G010991	asmbl_65564	0.947483	NA	NA	NA	NA
HVAEP1-G018218	CLYHEMG010410	0.947313	NA	NA	NA	NA
HVAEP1-G005193	asmbl_32817	0.946488	LMLN	ENSG00000185621	leishmanolysin like peptidase	NA
HVAEP1-G021739	asmbl_63074	0.94492	uif	FBgn0031879	NA	NA
HVAEP1-G020405	asmbl_54296	0.944919	MFSD6	ENSG00000151690	major facilitator superfamily domain containing 6	NA
HVAEP1-G020262	CLYHEMG003262	0.939567	NA	NA	NA	NA
HVAEP1-G002610	asmbl_2412	0.93951	NA	NA	NA	NA
HVAEP1-G023510	asmbl_39098	0.937795	NA	NA	NA	NA
HVAEP1-G023637	CLYHEMG021517	0.936713	LNPEP, ERAP2, ERAP1	ENSG00000113441, ENSG00000164308, ENSG00000164307	leucyl and cystinyl aminopeptidase, endoplasmic reticulum aminopeptidase 2, endoplasmic reticulum aminopeptidase 1	NA
HVAEP1-G027734	asmbl_45826	0.935756	NA	NA	NA	NA
HVAEP1-G026961	asmbl_21749	0.932314	NA	NA	NA	NA
HVAEP1-G021609	asmbl_38449	0.930866	NA	NA	NA	NA
HVAEP1-G020561	asmbl_88213	0.930004	NA	NA	NA	NA
HVAEP1-G023645	asmbl_67548	0.929259	NA	NA	NA	NA
HVAEP1-G002022	asmbl_23104	0.928406	TSTD3	ENSG00000279170	thiosulfate sulfurtransferase like domain containing 3	NA
HVAEP1-G023653	asmbl_50771	0.92621	NA	NA	NA	NA
HVAEP1-G007752	asmbl_82238	0.925707	NA	NA	NA	NA
HVAEP1-G022880	asmbl_31008	0.923494	NA	NA	NA	NA
HVAEP1-G022460	asmbl_73616	0.923185	DKK4, DKK2, DKK1, DKK3	ENSG00000104371, ENSG00000155011, ENSG00000107984, ENSG00000050165	dickkopf WNT signaling pathway inhibitor 1, dickkopf WNT signaling pathway inhibitor 4, dickkopf WNT signaling pathway inhibitor 2, dickkopf WNT signaling pathway inhibitor 3	NA
HVAEP1-G022180	asmbl_6051	0.923019	NA	NA	NA	FJ177032.1; nematoblast-specific protein nb035-sv2 (nb035), complete cds, alternatively spliced
HVAEP1-G018425	asmbl_16782	0.922872	NA	NA	NA	NA
HVAEP1-G011620	asmbl_89169	0.921675	NA	NA	NA	NA
HVAEP1-G001799	asmbl_81881	0.92085	NA	NA	NA	NA
HVAEP1-G003948	asmbl_60263	0.919628	NA	NA	NA	NA
HVAEP1-G021815	asmbl_30989	0.919187	ASCL3, ASCL5, ASCL4	ENSG00000176009, ENSG00000232237, ENSG00000187855	achaete-scute family bHLH transcription factor 3, achaete-scute family bHLH transcription factor 4, achaete-scute family bHLH transcription factor 5	AY336082.1; achaete-scute-like protein
HVAEP1-G010380	asmbl_49693	0.917963	TBC1D8B, TBC1D8, TBC1D9, TBC1D9B, TBC1D9B	ENSG00000133138, ENSG00000204634, ENSG00000109436, ENSG00000284400, ENSG00000197226	TBC1 domain family member 9B, TBC1 domain family member 8B, TBC1 domain family member 9, TBC1 domain family member 8	NA
HVAEP1-G005780	asmbl_85734	0.917506	EBF2, EBF1, EBF3, EBF4	ENSG00000221818, ENSG00000164330, ENSG00000108001, ENSG00000088881	EBF family member 4, EBF transcription factor 2, EBF transcription factor 3, EBF transcription factor 1	NA
HVAEP1-G004152	asmbl_40356	0.917347	NA	NA	NA	NA
HVAEP1-G014870	CLYHEMG023587	0.916326	NA	NA	NA	NA
HVAEP1-G004573	asmbl_36902	0.916094	NA	NA	NA	NA
HVAEP1-G023601	CLYHEMG010572	0.914029	NA	NA	NA	NA
HVAEP1-G003984	asmbl_88447	0.914007	try-10	WBGene00008849	TRYpsin-like protease	NA
HVAEP1-G023834	asmbl_79182	0.913541	NA	NA	NA	NA
HVAEP1-G026019	asmbl_48975	0.908724	APOB	ENSG00000084674	apolipoprotein B	NA
HVAEP1-G004349	asmbl_19890	0.907321	NA	NA	NA	NA
HVAEP1-G016545	asmbl_80609	0.906422	NA	NA	NA	NA
HVAEP1-G022046	CLYHEMG010108	0.905099	NA	NA	NA	NA
HVAEP1-G003945	asmbl_52118	0.904418	NA	NA	NA	NA
HVAEP1-G007966	asmbl_76729	0.903174	NA	NA	NA	NA
HVAEP1-G005073	asmbl_68918	0.903038	MMAA	ENSG00000151611	metabolism of cobalamin associated A	NA
HVAEP1-G006618	asmbl_34088	0.902554	M3, clos	FBgn0005390, FBgn0261016	NA	NA
HVAEP1-G015934	asmbl_85197	0.901128	NA	NA	NA	NA
HVAEP1-G003928	asmbl_65315	0.900755	NA	NA	NA	NA
HVAEP1-G023379	asmbl_46355	0.900415	VILL, AVIL, VIL1, CAPG, SCIN, GSN	ENSG00000136059, ENSG00000135407, ENSG00000127831, ENSG00000042493, ENSG00000006747, ENSG00000148180	scinderin, gelsolin, advillin, capping actin protein, gelsolin like, villin like, villin 1	NA
HVAEP1-G008398	asmbl_41995	0.899488	NEUROD4, NEUROD2, NEUROD6, NEUROD1	ENSG00000123307, ENSG00000171532, ENSG00000164600, ENSG00000162992	neuronal differentiation 6, neuronal differentiation 4, neuronal differentiation 2, neuronal differentiation 1	NA
HVAEP1-G022348	asmbl_41592	0.899415	NA	NA	NA	KY053289.1; strain Ind-Pune histone H2A.X.2
HVAEP1-G003877	asmbl_36992	0.897522	NA	NA	NA	NA
HVAEP1-G028471	asmbl_65499	0.897311	NA	NA	NA	NA
HVAEP1-G025690	asmbl_20158	0.896629	TRIM56	ENSG00000169871	tripartite motif containing 56	NA
HVAEP1-G004123	asmbl_28841	0.895658	sens	FBgn0002573	NA	NA
HVAEP1-G012038	asmbl_89275	0.894828	NA	NA	NA	NA
HVAEP1-G001881	asmbl_53523	0.893743	NA	NA	NA	NA
HVAEP1-G015707	asmbl_86160	0.892853	NA	NA	NA	NA
HVAEP1-G021993	asmbl_86766	0.892345	NA	NA	NA	NA
HVAEP1-G010765	asmbl_48186	0.890599	FSHR, LHCGR, TSHR	ENSG00000170820, ENSG00000138039, ENSG00000165409	thyroid stimulating hormone receptor, luteinizing hormone/choriogonadotropin receptor, follicle stimulating hormone receptor	NA
HVAEP1-G021820	asmbl_50775	0.890298	DKK4, DKK2, DKK1, DKK3	ENSG00000104371, ENSG00000155011, ENSG00000107984, ENSG00000050165	dickkopf WNT signaling pathway inhibitor 1, dickkopf WNT signaling pathway inhibitor 4, dickkopf WNT signaling pathway inhibitor 2, dickkopf WNT signaling pathway inhibitor 3	AY332609.1; dickkopf-3 related protein
HVAEP1-G021814	asmbl_11364	0.888544	DKK4, DKK2, DKK1, DKK3	ENSG00000104371, ENSG00000155011, ENSG00000107984, ENSG00000050165	dickkopf WNT signaling pathway inhibitor 1, dickkopf WNT signaling pathway inhibitor 4, dickkopf WNT signaling pathway inhibitor 2, dickkopf WNT signaling pathway inhibitor 3	NA
HVAEP1-G017605	asmbl_65402	0.887613	NA	NA	NA	NA
HVAEP1-G001584	asmbl_18975	0.885418	NA	NA	NA	NA
HVAEP1-G006844	CLYHEMG012488	0.885309	NA	NA	NA	NA
HVAEP1-G027543	asmbl_86647	0.883335	IZUMO1R, FOLR1, FOLR3, FOLR2	ENSG00000183560, ENSG00000110195, ENSG00000110203, ENSG00000165457	folate receptor alpha, folate receptor gamma, IZUMO1 receptor, JUNO, folate receptor beta	NA
HVAEP1-G018874	asmbl_50463	0.880018	NA	NA	NA	NA
HVAEP1-G022798	asmbl_36290	0.878365	MAPK15, MAPK15	ENSG00000274205, ENSG00000181085	mitogen-activated protein kinase 15	NA
HVAEP1-G019617	asmbl_45257	0.876658	NA	NA	NA	NA
HVAEP1-G006103	asmbl_4245	0.875714	klu	FBgn0013469	NA	JQ994221.1; transcription factor ZNF845
HVAEP1-G014913	asmbl_32682	0.875023	NA	NA	NA	NA
HVAEP1-G007798	asmbl_76799	0.87461	NA	NA	NA	NA
HVAEP1-G006972	asmbl_63289	0.87352	NA	NA	NA	NA
HVAEP1-G007760	asmbl_90864	0.87229	NA	NA	NA	NA
HVAEP1-G007132	asmbl_16798	0.87114	NA	NA	NA	NA
HVAEP1-G028535	asmbl_48429	0.87102	NA	NA	NA	NA
HVAEP1-G028451	asmbl_51642	0.869274	NA	NA	NA	AB583747.1; nematogalectin-related 2
HVAEP1-G011097	asmbl_16003	0.869273	NA	NA	NA	NA
HVAEP1-G025495	asmbl_9897	0.868917	NA	NA	NA	NA
HVAEP1-G004294	CLYHEMG022239	0.866347	NA	NA	NA	NA
HVAEP1-G028879	asmbl_42860	0.865538	TP53INP1, TP53INP2	ENSG00000164938, ENSG00000078804	tumor protein p53 inducible nuclear protein 2, tumor protein p53 inducible nuclear protein 1	NA
HVAEP1-G007700	asmbl_3344	0.865237	NA	NA	NA	NA
HVAEP1-G019967	asmbl_90549	0.864265	NA	NA	NA	NA
HVAEP1-G023860	asmbl_72836	0.864236	26-29-p	FBgn0250848	NA	NA
HVAEP1-G022307	asmbl_66370	0.862475	NA	NA	NA	NA
HVAEP1-G019611	asmbl_8020	0.86145	spp-15	WBGene00005000	SaPosin-like Protein family	NA
HVAEP1-G028385	asmbl_51656	0.861001	NA	NA	NA	AB588620.1; nematogalectin, complete cds, strain: AEP
HVAEP1-G022847	asmbl_830	0.859105	rin	FBgn0015778	NA	NA
HVAEP1-G012183	asmbl_15973	0.857977	HYAL1, HYAL4, SPAM1, HYAL2, HYAL3	ENSG00000114378, ENSG00000106302, ENSG00000106304, ENSG00000068001, ENSG00000186792	hyaluronidase 1, hyaluronidase 2, hyaluronidase 4, sperm adhesion molecule 1, hyaluronidase 3	NA
HVAEP1-G008919	asmbl_8854	0.856963	NA	NA	NA	NA
HVAEP1-G012846	asmbl_25568	0.855862	PLK5, PLK2, PLK3	ENSG00000185988, ENSG00000145632, ENSG00000173846	polo like kinase 5 (inactive), polo like kinase 2, polo like kinase 3	NA
HVAEP1-G009465	CLYHEMG019168	0.854547	NA	NA	NA	NA
HVAEP1-G022092	asmbl_59860	0.85301	NA	NA	NA	JN379588.1; boule-like protein 1 (bol1)
HVAEP1-G025406	asmbl_26357	0.852875	NA	NA	NA	NA
HVAEP1-G015336	asmbl_32692	0.850856	NA	NA	NA	NA
HVAEP1-G006607	asmbl_35001	0.849415	WDTC1	ENSG00000142784	WD and tetratricopeptide repeats 1	NA
HVAEP1-G021599	asmbl_58714	0.848613	NA	NA	NA	NA
HVAEP1-G025550	asmbl_20189	0.846452	ninaA	FBgn0002936	NA	NA
HVAEP1-G023479	asmbl_33910	0.845768	NA	NA	NA	NA
HVAEP1-G010789	asmbl_27137	0.844916	NME9, NME8	ENSG00000181322, ENSG00000086288	NME/NM23 family member 8, NME/NM23 family member 9	NA
HVAEP1-G022744	asmbl_50829	0.842915	NA	NA	NA	NA
HVAEP1-G020291	asmbl_13014	0.84257	COL3A1, COL5A2, COL2A1, COL1A1, COL1A2	ENSG00000168542, ENSG00000204262, ENSG00000139219, ENSG00000108821, ENSG00000164692	collagen type II alpha 1 chain, collagen type I alpha 2 chain, collagen type I alpha 1 chain, collagen type V alpha 2 chain, collagen type III alpha 1 chain	AF525468.1; fibrillar collagen precursor
HVAEP1-G020792	asmbl_84729	0.840451	NA	NA	NA	NA
HVAEP1-G010990	asmbl_53633	0.839268	NOP58	ENSG00000055044	NOP58 ribonucleoprotein	NA
HVAEP1-G027970	asmbl_62581	0.838633	SCCPDH	ENSG00000143653	saccharopine dehydrogenase (putative)	NA
HVAEP1-G007699	asmbl_3352	0.837165	NA	NA	NA	NA
HVAEP1-G022521	asmbl_50601	0.836104	KCTD12, KCTD16, KCTD8	ENSG00000178695, ENSG00000183775, ENSG00000183783	potassium channel tetramerization domain containing 12, potassium channel tetramerization domain containing 8, potassium channel tetramerization domain containing 16	NA
HVAEP1-G023533	asmbl_59278	0.835869	NA	NA	NA	NA
HVAEP1-G020286	asmbl_78614	0.834944	NA	NA	NA	NA
HVAEP1-G006942	asmbl_38224	0.834887	NA	NA	NA	NA
HVAEP1-G024029	asmbl_50765	0.833996	NA	NA	NA	NA
HVAEP1-G021469	asmbl_19280	0.832833	NA	NA	NA	NA
HVAEP1-G023480	asmbl_33905	0.832593	CG12567	FBgn0039958	NA	NA
HVAEP1-G021200	asmbl_87840	0.830662	M01H9.2	WBGene00019718	hypothetical protein	NA
HVAEP1-G005557	asmbl_10259	0.829358	FOXN4, FOXN1	ENSG00000139445, ENSG00000109101	forkhead box N4, forkhead box N1	NA
HVAEP1-G004295	asmbl_30528	0.827617	NA	NA	NA	NA
HVAEP1-G010752	asmbl_17877	0.82536	NA	NA	NA	NA
HVAEP1-G003992	asmbl_52514	0.824558	TRIM56	ENSG00000169871	tripartite motif containing 56	NA
HVAEP1-G013001	asmbl_51303	0.824008	PCNA	ENSG00000132646	proliferating cell nuclear antigen	MK123983.1; voucher AHNUHV 2011003 proliferating cell nuclear antigen (PCNA)
HVAEP1-G022693	asmbl_73626	0.823743	NA	NA	NA	NA
HVAEP1-G006072	asmbl_46265	0.822455	KPNA7, KPNA7, KPNA2	ENSG00000284068, ENSG00000185467, ENSG00000182481	karyopherin subunit alpha 7, karyopherin subunit alpha 2	NA
HVAEP1-G019562	asmbl_89083	0.822423	rdh11	ENSXETG00000014949	retinol dehydrogenase 11	NA
HVAEP1-G009982	asmbl_56995	0.822231	FKBP10, FKBP9	ENSG00000141756, ENSG00000122642	FKBP prolyl isomerase 9, FKBP prolyl isomerase 10	NA
HVAEP1-G028560	asmbl_82961	0.822054	CEP152	ENSG00000103995	centrosomal protein 152	NA
HVAEP1-G027432	asmbl_55471	0.820815	NA	NA	NA	NA
HVAEP1-G019112	asmbl_56015	0.819427	NA	NA	NA	NA
HVAEP1-G023684	asmbl_63586	0.818563	DNAJC22	ENSG00000178401	DnaJ heat shock protein family (Hsp40) member C22	NA
HVAEP1-G009580	asmbl_9239	0.818502	NOP56	ENSG00000101361	NOP56 ribonucleoprotein	NA
HVAEP1-G019998	asmbl_90603	0.817732	NA	NA	NA	NA
HVAEP1-G015639	asmbl_66898	0.817533	NA	NA	NA	NA
HVAEP1-G022882	asmbl_49122	0.817089	NA	NA	NA	NA
HVAEP1-G009156	asmbl_74460	0.815252	NA	NA	NA	NA
HVAEP1-G002116	asmbl_49683	0.81504	Npc2g, Npc2h	FBgn0039800, FBgn0039801	NA	NA
HVAEP1-G008781	asmbl_70328	0.811749	NA	NA	NA	NA
HVAEP1-G020735	asmbl_36596	0.810148	NA	NA	NA	NA
HVAEP1-G021927	asmbl_59902	0.809852	NA	NA	NA	NA
HVAEP1-G012961	asmbl_45780	0.808799	NASP	ENSG00000132780	nuclear autoantigenic sperm protein	NA
HVAEP1-G017943	asmbl_21587	0.808456	NA	NA	NA	NA
HVAEP1-G006339	asmbl_14219	0.805824	DUT	ENSG00000128951	deoxyuridine triphosphatase	NA
HVAEP1-G018549	asmbl_36486	0.805439	fam107a	ENSXETG00000038631	somatomedin-B and thrombospondin type-1 domain-containing protein	NA
HVAEP1-G014555	asmbl_4144	0.804841	GGH	ENSG00000137563	gamma-glutamyl hydrolase	NA
HVAEP1-G023517	asmbl_81932	0.80468	rin	FBgn0015778	NA	NA
HVAEP1-G022522	asmbl_44980	0.804239	NA	NA	NA	NA
HVAEP1-G007633	asmbl_42011	0.80414	NA	NA	NA	NA
HVAEP1-G017289	asmbl_31461	0.803326	NA	NA	NA	NA
HVAEP1-G006729	CLYHEMG013742	0.803215	LATS2, LATS1	ENSG00000150457, ENSG00000131023	large tumor suppressor kinase 2, large tumor suppressor kinase 1	NA
HVAEP1-G021389	asmbl_16682	0.802144	NA	NA	NA	NA
HVAEP1-G016259	asmbl_42172	0.800559	Nhe3	FBgn0028703	NA	NA
HVAEP1-G016632	asmbl_78299	0.800181	RNASET2	ENSG00000026297	ribonuclease T2	NA
HVAEP1-G019249	asmbl_12718	0.799381	GGT5, GGTLC3, GGT2, GGTLC1, GGT1, GGTLC2	ENSG00000099998, ENSG00000274252, ENSG00000133475, ENSG00000149435, ENSG00000100031, ENSG00000100121	gamma-glutamyltransferase 2, gamma-glutamyltransferase light chain family member 3, gamma-glutamyltransferase light chain 2, gamma-glutamyltransferase light chain 1, gamma-glutamyltransferase 1, gamma-glutamyltransferase 5	NA
HVAEP1-G019927	asmbl_37210	0.798849	NA	NA	NA	NA
HVAEP1-G024904	nbis-gene-138	0.798648	CCDC122	ENSG00000151773	coiled-coil domain containing 122	NA
HVAEP1-G003643	asmbl_71164	0.798188	NA	NA	NA	NA
HVAEP1-G003385	asmbl_49311	0.798179	NA	NA	NA	NA
HVAEP1-G028648	asmbl_43970	0.79727	NA	NA	NA	NA
HVAEP1-G009413	asmbl_56471	0.795284	CCDC172	ENSG00000182645	coiled-coil domain containing 172	NA
HVAEP1-G008687	asmbl_47709	0.795196	AQP1, MIP, AQP5, AQP2, AQP6, AQP4	ENSG00000240583, ENSG00000135517, ENSG00000161798, ENSG00000167580, ENSG00000086159, ENSG00000171885	aquaporin 4, aquaporin 1 (Colton blood group), aquaporin 6, aquaporin 5, aquaporin 2, major intrinsic protein of lens fiber	NA
HVAEP1-G023106	CLYHEMG010127	0.792816	POU4F3, POU4F1, POU4F2	ENSG00000091010, ENSG00000152192, ENSG00000151615	POU class 4 homeobox 1, POU class 4 homeobox 2, POU class 4 homeobox 3	NA
HVAEP1-G022350	asmbl_49128	0.792399	Ppt1	FBgn0030057	NA	NA
HVAEP1-G024505	asmbl_61624	0.792216	KANSL2	ENSG00000139620	KAT8 regulatory NSL complex subunit 2	NA
HVAEP1-G014373	asmbl_22768	0.791187	HPS6	ENSG00000166189	HPS6 biogenesis of lysosomal organelles complex 2 subunit 3	NA
HVAEP1-G025627	asmbl_52779	0.789431	ZC4H2	ENSG00000126970	zinc finger C4H2-type containing	NA
HVAEP1-G016296	asmbl_26815	0.78933	RBPMS2, RBPMS	ENSG00000166831, ENSG00000157110	RNA binding protein, mRNA processing factor, RNA binding protein, mRNA processing factor 2	NA
HVAEP1-G004203	asmbl_89379	0.789278	CG7402, CG7408, CG32191, CG8646	FBgn0036768, FBgn0036765, FBgn0052191, FBgn0033763	NA	NA
HVAEP1-G019178	CLYHEMG021074	0.787995	F21D5.4, Y48G1C.6	WBGene00009009, WBGene00021679	hypothetical protein	NA
HVAEP1-G004983	asmbl_61917	0.78771	NA	NA	NA	NA
HVAEP1-G021417	CLYHEMG020334	0.787496	ATP6V0C	ENSG00000185883	ATPase H+ transporting V0 subunit c	NA
HVAEP1-G027197	asmbl_21696	0.787117	NA	NA	NA	NA
HVAEP1-G021040	asmbl_16987	0.785209	MCM6	ENSG00000076003	minichromosome maintenance complex component 6	NA
HVAEP1-G022848	asmbl_834	0.784883	NA	NA	NA	NA
HVAEP1-G008701	asmbl_41978	0.784324	NA	NA	NA	NA
HVAEP1-G024924	asmbl_51891	0.782467	H1-8	ENSG00000178804	H1.8 linker histone	NA
HVAEP1-G022619	asmbl_44953	0.782066	NA	NA	NA	NA
HVAEP1-G011838	asmbl_15226	0.78052	NA	NA	NA	NA
HVAEP1-G021423	asmbl_43317	0.780299	NA	NA	NA	NA
HVAEP1-G001522	asmbl_18285	0.779182	NA	NA	NA	NA
HVAEP1-G001795	asmbl_18955	0.779174	RRP1B, RRP1	ENSG00000160208, ENSG00000160214	ribosomal RNA processing 1B, ribosomal RNA processing 1	NA
HVAEP1-G001858	asmbl_43936	0.778992	CFAP126	ENSG00000188931	cilia and flagella associated protein 126	NA
HVAEP1-G012482	asmbl_1746	0.77859	NA	NA	NA	NA
HVAEP1-G013059	CLYHEMG020379	0.777279	BRIX1	ENSG00000113460	biogenesis of ribosomes BRX1	NA
HVAEP1-G023501	asmbl_47813	0.776384	NA	NA	NA	NA
HVAEP1-G016277	asmbl_51481	0.776169	DEGS1, DEGS2	ENSG00000143753, ENSG00000168350	delta 4-desaturase, sphingolipid 2, delta 4-desaturase, sphingolipid 1	NA
HVAEP1-G010527	asmbl_33855	0.775706	nhr-236	WBGene00021417	Nuclear Hormone Receptor family	NA
HVAEP1-G022797	asmbl_4072	0.77519	DEK	ENSG00000124795	DEK proto-oncogene	NA
HVAEP1-G003423	asmbl_48423	0.773965	GMNN	ENSG00000112312	geminin DNA replication inhibitor	NA
HVAEP1-G019743	asmbl_55725	0.77206	NA	NA	NA	NA
HVAEP1-G026859	asmbl_21777	0.770901	GNL3L, GNL3	ENSG00000130119, ENSG00000163938	G protein nucleolar 3 like, G protein nucleolar 3	NA
HVAEP1-G022588	asmbl_33893	0.770444	NA	NA	NA	NA
HVAEP1-G027422	asmbl_21709	0.769286	GABARAPL2	ENSG00000034713	GABA type A receptor associated protein like 2	NA
HVAEP1-G023959	asmbl_4017	0.769196	HMMR	ENSG00000072571	hyaluronan mediated motility receptor	NA
HVAEP1-G018215	asmbl_21611	0.76802	NA	NA	NA	NA
HVAEP1-G003313	asmbl_49331	0.767733	KIF23	ENSG00000137807	kinesin family member 23	NA
HVAEP1-G004201	asmbl_89366	0.766933	NA	NA	NA	NA
HVAEP1-G000603	asmbl_65168	0.766619	U2AF1, U2AF1L5, U2AF1L4	ENSG00000160201, ENSG00000275895, ENSG00000161265	U2 small nuclear RNA auxiliary factor 1 like 5, U2 small nuclear RNA auxiliary factor 1, U2 small nuclear RNA auxiliary factor 1 like 4	NA
HVAEP1-G001217	asmbl_73526	0.765866	NA	NA	NA	NA
HVAEP1-G021655	asmbl_63569	0.763791	NA	NA	NA	NA
HVAEP1-G009126	asmbl_61890	0.761638	NA	NA	NA	NA
HVAEP1-G016379	asmbl_50222	0.761566	SYT14, SYT16	ENSG00000143469, ENSG00000139973	synaptotagmin 16, synaptotagmin 14	NA
HVAEP1-G012059	asmbl_84605	0.761147	CDC6	ENSG00000094804	cell division cycle 6	NA
HVAEP1-G016575	CLYHEMG001387	0.757954	MAGOH, MAGOHB	ENSG00000162385, ENSG00000111196	mago homolog B, exon junction complex subunit, mago homolog, exon junction complex subunit	NA
HVAEP1-G016866	CLYHEMG012290	0.756848	NA	NA	NA	NA
HVAEP1-G017685	asmbl_12710	0.756814	PES1	ENSG00000100029	pescadillo ribosomal biogenesis factor 1	NA
HVAEP1-G022249	asmbl_39772	0.756607	NA	NA	NA	NA
HVAEP1-G021821	asmbl_50773	0.756584	NA	NA	NA	NA
HVAEP1-G013441	asmbl_46139	0.756022	CPEB1, CPEB1	ENSG00000277445, ENSG00000214575	cytoplasmic polyadenylation element binding protein 1	NA
HVAEP1-G018647	asmbl_89628	0.753763	NA	NA	NA	NA
HVAEP1-G027396	asmbl_90148	0.753456	NA	NA	NA	NA
HVAEP1-G022159	asmbl_72762	0.753281	NA	NA	NA	NA
HVAEP1-G009026	asmbl_3345	0.752311	DIDO1, PHF3	ENSG00000101191, ENSG00000118482	death inducer-obliterator 1, PHD finger protein 3	NA
HVAEP1-G012153	asmbl_26542	0.751635	CEP128	ENSG00000100629	centrosomal protein 128	NA
HVAEP1-G022822	asmbl_9461	0.751134	PWP2	ENSG00000241945	PWP2 small subunit processome component	NA
HVAEP1-G023724	asmbl_6390	0.749461	NA	NA	NA	NA
HVAEP1-G005191	asmbl_22238	0.748288	NA	NA	NA	NA
HVAEP1-G025129	asmbl_40957	0.74812	WDR77	ENSG00000116455	WD repeat domain 77	NA
HVAEP1-G008237	asmbl_42037	0.746965	Mco4, Mco3, Mco1, stw	FBgn0052557, FBgn0039387, FBgn0032116, FBgn0286203	NA	NA
HVAEP1-G018149	asmbl_2878	0.74564	NA	NA	NA	NA
HVAEP1-G009932	asmbl_51079	0.745077	NA	NA	NA	NA
HVAEP1-G003768	asmbl_63788	0.744991	DDX39B, DDX39B, DDX39B, DDX39B, DDX39B, DDX39B, DDX39B, DDX39B, DDX39A	ENSG00000237889, ENSG00000235439, ENSG00000229496, ENSG00000230624, ENSG00000225859, ENSG00000225073, ENSG00000215425, ENSG00000198563, ENSG00000123136	DExD-box helicase 39B, DExD-box helicase 39A	NA
HVAEP1-G021588	asmbl_67181	0.744423	ATOH8	ENSG00000168874	atonal bHLH transcription factor 8	NA
HVAEP1-G011564	asmbl_65683	0.743611	NA	NA	NA	NA
HVAEP1-G022973	CLYHEMG014129	0.742649	NA	NA	NA	NA
HVAEP1-G018201	asmbl_66028	0.742326	NKX1-1, NKX1-2	ENSG00000235608, ENSG00000229544	NK1 homeobox 1, NK1 homeobox 2	NA
HVAEP1-G024914	asmbl_39591	0.741662	MYBBP1A	ENSG00000132382	MYB binding protein 1a	NA
HVAEP1-G013030	asmbl_18052	0.741205	GGT5, GGTLC3, GGT2, GGTLC1, GGT1, GGTLC2	ENSG00000099998, ENSG00000274252, ENSG00000133475, ENSG00000149435, ENSG00000100031, ENSG00000100121	gamma-glutamyltransferase 2, gamma-glutamyltransferase light chain family member 3, gamma-glutamyltransferase light chain 2, gamma-glutamyltransferase light chain 1, gamma-glutamyltransferase 1, gamma-glutamyltransferase 5	NA
HVAEP1-G019643	asmbl_44552	0.737828	NA	NA	NA	MK376923.1; innexin 8 (INX8)
HVAEP1-G001365	asmbl_23907	0.736595	SIK3	ENSG00000160584	SIK family kinase 3	NA
HVAEP1-G003887	asmbl_23730	0.736101	ATR	ENSG00000175054	ATR serine/threonine kinase	NA
HVAEP1-G006024	CLYHEMG013408	0.736041	NDP	ENSG00000124479	norrin cystine knot growth factor NDP	NA
HVAEP1-G003997	asmbl_65376	0.73498	NA	NA	NA	NA
HVAEP1-G007063	asmbl_30340	0.73475	SLC17A2	ENSG00000112337	solute carrier family 17 member 2	NA
HVAEP1-G001749	asmbl_41255	0.734479	NA	NA	NA	NA
HVAEP1-G001375	asmbl_23868	0.734423	NA	NA	NA	NA
HVAEP1-G001502	asmbl_43738	0.734382	NA	NA	NA	NA
HVAEP1-G014781	asmbl_32724	0.73431	NA	NA	NA	NA
HVAEP1-G010629	asmbl_57200	0.734031	SSB	ENSG00000138385	small RNA binding exonuclease protection factor La	NA
HVAEP1-G023536	asmbl_86719	0.731469	NA	NA	NA	AF539862.1; nematocyst outer wall antigen precursor (NOWA)
HVAEP1-G028736	asmbl_65468	0.729606	AHCY	ENSG00000101444	adenosylhomocysteinase	NA
HVAEP1-G020896	CLYHEMG022937	0.729593	NA	NA	NA	NA
HVAEP1-G027410	asmbl_65776	0.729489	AGXT2	ENSG00000113492	alanine--glyoxylate aminotransferase 2	NA
HVAEP1-G009410	asmbl_14207	0.72947	CG18585, CG7025, CG14820, CG12374, CG2915, CG4408, CG17633, CG4017	FBgn0031929, FBgn0031930, FBgn0035718, FBgn0033774, FBgn0033241, FBgn0039073, FBgn0032144, FBgn0032143	NA	NA
HVAEP1-G016269	asmbl_85358	0.729193	NA	NA	NA	NA
HVAEP1-G003452	asmbl_65360	0.728407	pde-5	WBGene00016328	Probable 3',5'-cyclic phosphodiesterase pde-5	NA
HVAEP1-G021465	asmbl_3858	0.728349	rnr-1	WBGene00004391	Ribonucleoside-diphosphate reductase large subunit	NA
HVAEP1-G023273	asmbl_76192	0.727206	PPM1G	ENSG00000115241	protein phosphatase, Mg2+/Mn2+ dependent 1G	NA
HVAEP1-G015830	asmbl_48612	0.726936	NA	NA	NA	NA
HVAEP1-G011719	asmbl_29414	0.725453	NA	NA	NA	NA
HVAEP1-G021931	asmbl_41383	0.725265	NA	NA	NA	NA
HVAEP1-G022397	asmbl_35995	0.724546	Ptprv	ENSMUSG00000097993	protein tyrosine phosphatase, receptor type, V	NA
HVAEP1-G011164	asmbl_15292	0.723607	NA	NA	NA	NA
HVAEP1-G012705	asmbl_88318	0.723446	NA	NA	NA	NA
HVAEP1-G016386	asmbl_52258	0.723029	NA	NA	NA	NA
HVAEP1-G018420	CLYHEMG004106	0.72263	SNRPD3	ENSG00000100028	small nuclear ribonucleoprotein D3 polypeptide	NA
HVAEP1-G010426	asmbl_33333	0.721652	NA	NA	NA	NA
HVAEP1-G004308	asmbl_30522	0.721538	NA	NA	NA	NA
HVAEP1-G020871	asmbl_68351	0.72137	MYL3, MYL4, MYL1, MYL6, MYL6B	ENSG00000160808, ENSG00000198336, ENSG00000168530, ENSG00000092841, ENSG00000196465	myosin light chain 6, myosin light chain 3, myosin light chain 6B, myosin light chain 4, myosin light chain 1	NA
HVAEP1-G014269	asmbl_24051	0.721298	UTP6	ENSG00000108651	UTP6 small subunit processome component	NA
HVAEP1-G028189	asmbl_82999	0.720765	PNP	ENSG00000198805	purine nucleoside phosphorylase	NA
HVAEP1-G010750	asmbl_53612	0.720764	NA	NA	NA	NA
HVAEP1-G011864	asmbl_90259	0.720494	VILL, AVIL, VIL1, CAPG, SCIN, GSN	ENSG00000136059, ENSG00000135407, ENSG00000127831, ENSG00000042493, ENSG00000006747, ENSG00000148180	scinderin, gelsolin, advillin, capping actin protein, gelsolin like, villin like, villin 1	NA
HVAEP1-G009279	asmbl_42237	0.720458	NA	NA	NA	NA
HVAEP1-G006340	asmbl_84915	0.720151	NAXD	ENSG00000213995	NAD(P)HX dehydratase	NA
HVAEP1-G023650	asmbl_37647	0.720091	HMGB1, HMGB3, HMGB2	ENSG00000189403, ENSG00000029993, ENSG00000164104	high mobility group box 1, high mobility group box 3, high mobility group box 2	JQ994217.1; transcription factor HMG-B3b
HVAEP1-G012926	asmbl_71365	0.71949	P4HTM	ENSG00000178467	prolyl 4-hydroxylase, transmembrane	NA
HVAEP1-G019426	asmbl_78465	0.717172	NA	NA	NA	EU787490.1; minicollagen-15
HVAEP1-G020126	asmbl_67844	0.716593	NA	NA	NA	NA
HVAEP1-G001581	asmbl_28057	0.716241	NA	NA	NA	NA
HVAEP1-G010017	asmbl_72518	0.7146	RFX6	ENSG00000185002	regulatory factor X6	NA
HVAEP1-G022455	asmbl_49137	0.714152	CREB3L1, CREB3L2	ENSG00000157613, ENSG00000182158	cAMP responsive element binding protein 3 like 2, cAMP responsive element binding protein 3 like 1	NA
HVAEP1-G015248	asmbl_85174	0.713887	P4HB, PDIA2, ERP27, PDILT	ENSG00000185624, ENSG00000185615, ENSG00000139055, ENSG00000169340	protein disulfide isomerase family A member 2, endoplasmic reticulum protein 27, protein disulfide isomerase like, testis expressed, prolyl 4-hydroxylase subunit beta	NA
HVAEP1-G016278	asmbl_51471	0.711628	fat-3, fat-4	WBGene00001395, WBGene00001396	Delta(6)-fatty-acid desaturase fat-3, Delta(5) fatty acid desaturase fat-4	NA
HVAEP1-G025452	asmbl_45667	0.711365	MRPL20	ENSG00000242485	mitochondrial ribosomal protein L20	NA
HVAEP1-G012704	asmbl_88321	0.710781	HSP90B1	ENSG00000166598	heat shock protein 90 beta family member 1	NA
HVAEP1-G020976	asmbl_54278	0.710622	NA	NA	NA	NA
HVAEP1-G021413	asmbl_67198	0.708876	NA	NA	NA	NA
HVAEP1-G021988	asmbl_73970	0.708645	NA	NA	NA	NA
HVAEP1-G022234	asmbl_73729	0.708426	ASAH1	ENSG00000104763	N-acylsphingosine amidohydrolase 1	NA
HVAEP1-G014213	asmbl_11753	0.708156	POLD2	ENSG00000106628	DNA polymerase delta 2, accessory subunit	NA
HVAEP1-G023100	asmbl_36072	0.708146	NA	NA	NA	NA
HVAEP1-G014065	asmbl_22904	0.707328	GNPTG	ENSG00000090581	N-acetylglucosamine-1-phosphate transferase subunit gamma	NA
HVAEP1-G008303	asmbl_82236	0.706411	NA	NA	NA	NA
HVAEP1-G023873	asmbl_41397	0.706255	CSE1L	ENSG00000124207	chromosome segregation 1 like	NA
HVAEP1-G018144	asmbl_28252	0.704675	CNTD1	ENSG00000176563	cyclin N-terminal domain containing 1	NA
HVAEP1-G009882	asmbl_58322	0.704132	NA	NA	NA	NA
HVAEP1-G001809	asmbl_606	0.704101	CCNB3	ENSG00000147082	cyclin B3	NA
HVAEP1-G018353	asmbl_8605	0.703334	FTSJ3	ENSG00000108592	FtsJ RNA 2'-O-methyltransferase 3	NA
HVAEP1-G012274	asmbl_85003	0.70269	SLC5A7	ENSG00000115665	solute carrier family 5 member 7	NA
HVAEP1-G022233	asmbl_27383	0.702663	RRP8	ENSG00000132275	ribosomal RNA processing 8	NA
HVAEP1-G006973	asmbl_62478	0.702402	NA	NA	NA	JQ994231.1; transcription factor HvSoxE2
HVAEP1-G011188	asmbl_29049	0.70205	NA	NA	NA	NA
HVAEP1-G004045	asmbl_89393	0.701301	NA	NA	NA	NA
HVAEP1-G022027	asmbl_11625	0.700554	CG43235, CG8945, CG3097, CG42264, CG3108, CG8539, CG8562, CG18417, CG8560, CG32379, CG8563, CG8564	FBgn0262880, FBgn0030815, FBgn0029804, FBgn0259149, FBgn0029807, FBgn0035791, FBgn0035779, FBgn0035780, FBgn0035781, FBgn0052379, FBgn0035777, FBgn0035776	NA	NA
HVAEP1-G005979	asmbl_56106	0.700548	ARID1A, ARID1B	ENSG00000117713, ENSG00000049618	AT-rich interaction domain 1A, AT-rich interaction domain 1B	NA
HVAEP1-G026906	CLYHEMG021680	0.700433	NA	NA	NA	NA
HVAEP1-G017964	CLYHEMG001980	0.699543	RFC5	ENSG00000111445	replication factor C subunit 5	NA
HVAEP1-G016268	asmbl_85359	0.69914	NA	NA	NA	NA
HVAEP1-G028341	asmbl_62598	0.698748	RNMT	ENSG00000101654	RNA guanine-7 methyltransferase	NA
HVAEP1-G002232	asmbl_27840	0.698437	MFS9	FBgn0038799	NA	NA
HVAEP1-G012009	asmbl_35540	0.697984	NOP2	ENSG00000111641	NOP2 nucleolar protein	NA
HVAEP1-G004586	asmbl_36926	0.697946	NA	NA	NA	NA
HVAEP1-G006311	asmbl_71411	0.697367	NA	NA	NA	NA
HVAEP1-G008423	asmbl_164	0.69724	Poxn	FBgn0003130	NA	U96193.1; Pax-A
HVAEP1-G015713	asmbl_79062	0.697182	NA	NA	NA	NA
HVAEP1-G009959	asmbl_56978	0.695577	NA	NA	NA	NA
HVAEP1-G014664	asmbl_83708	0.695464	RRS1	ENSG00000179041	ribosome biogenesis regulator 1 homolog	NA
HVAEP1-G020311	asmbl_66174	0.694656	NA	NA	NA	DQ679809.1; fibrillar collagen (col5)
HVAEP1-G020392	asmbl_78520	0.69463	NA	NA	NA	DQ679808.1; fibrillar collagen (col3)
HVAEP1-G009450	asmbl_11558	0.694207	NA	NA	NA	NA
HVAEP1-G003365	asmbl_19572	0.693837	QSOX2, QSOX1	ENSG00000165661, ENSG00000116260	quiescin sulfhydryl oxidase 2, quiescin sulfhydryl oxidase 1	NA
HVAEP1-G009338	asmbl_56557	0.693686	RBBP7, RBBP4	ENSG00000102054, ENSG00000162521	RB binding protein 7, chromatin remodeling factor, RB binding protein 4, chromatin remodeling factor	NA
HVAEP1-G001114	asmbl_80225	0.692734	PRMT1, PRMT8	ENSG00000126457, ENSG00000111218	protein arginine methyltransferase 8, protein arginine methyltransferase 1	NA
HVAEP1-G019498	asmbl_35551	0.692576	NA	NA	NA	NA
HVAEP1-G011547	asmbl_33339	0.692381	NEK2	ENSG00000117650	NIMA related kinase 2	NA
HVAEP1-G010722	asmbl_8414	0.690551	NA	NA	NA	NA
HVAEP1-G012663	CLYHEMG021146	0.690333	ZnT63C	FBgn0035432	NA	NA
HVAEP1-G010425	asmbl_65612	0.690284	MAP3K13, MAP3K12	ENSG00000073803, ENSG00000139625	mitogen-activated protein kinase kinase kinase 12, mitogen-activated protein kinase kinase kinase 13	NA
HVAEP1-G008909	asmbl_47126	0.690102	USP54, USP53	ENSG00000166348, ENSG00000145390	ubiquitin specific peptidase 53, ubiquitin specific peptidase 54	NA
HVAEP1-G022251	asmbl_39778	0.689813	SMYD2, SMYD1, SMYD3	ENSG00000143499, ENSG00000115593, ENSG00000185420	SET and MYND domain containing 1, SET and MYND domain containing 2, SET and MYND domain containing 3	NA
HVAEP1-G003565	asmbl_30489	0.688843	NA	NA	NA	NA
HVAEP1-G008731	asmbl_318	0.688518	SPATA6L, SPATA6	ENSG00000106686, ENSG00000132122	spermatogenesis associated 6 like, spermatogenesis associated 6	NA
HVAEP1-G023923	nbis-gene-59	0.688125	NA	NA	NA	NA
HVAEP1-G023734	asmbl_9456	0.688014	WWC1, WWC2, WWC3	ENSG00000113645, ENSG00000151718, ENSG00000047644	WWC family member 3, WW and C2 domain containing 2, WW and C2 domain containing 1	NA
HVAEP1-G022543	asmbl_73181	0.687304	CCNA2, CCNA1	ENSG00000145386, ENSG00000133101	cyclin A1, cyclin A2	NA
HVAEP1-G027778	asmbl_42674	0.687056	NOB1	ENSG00000141101	NIN1 (RPN12) binding protein 1 homolog	NA
HVAEP1-G024396	asmbl_45685	0.686991	F48E3.9	WBGene00018608	hypothetical protein	NA
HVAEP1-G003814	asmbl_33583	0.684901	CECR2	ENSG00000099954	CECR2 histone acetyl-lysine reader	NA
HVAEP1-G025513	asmbl_82548	0.684271	NA	NA	NA	NA
HVAEP1-G016146	asmbl_17814	0.683512	NA	NA	NA	NA
HVAEP1-G002310	asmbl_59300	0.683445	TLCD5	ENSG00000181264	TLC domain containing 5	NA
HVAEP1-G024428	asmbl_16823	0.683414	CCNB1, CCNB2	ENSG00000134057, ENSG00000157456	cyclin B2, cyclin B1	X90985.1; cyclin B
HVAEP1-G023268	asmbl_60796	0.682538	ENDOU	ENSG00000111405	endonuclease, poly(U) specific	NA
HVAEP1-G006574	asmbl_32811	0.681952	NA	NA	NA	NA
HVAEP1-G007822	asmbl_54702	0.681943	NA	NA	NA	NA
HVAEP1-G014778	asmbl_10665	0.681065	EIF3L	ENSG00000100129	eukaryotic translation initiation factor 3 subunit L	NA
HVAEP1-G016673	asmbl_31507	0.680675	NA	NA	NA	NA
HVAEP1-G023647	asmbl_75977	0.68023	NA	NA	NA	NA
HVAEP1-G014891	asmbl_22517	0.67988	KDELR2, KDELR3, KDELR1	ENSG00000136240, ENSG00000100196, ENSG00000105438	KDEL endoplasmic reticulum protein retention receptor 3, KDEL endoplasmic reticulum protein retention receptor 2, KDEL endoplasmic reticulum protein retention receptor 1	NA
HVAEP1-G019809	asmbl_44487	0.679558	NA	NA	NA	NA
HVAEP1-G008761	asmbl_16398	0.679003	H2AZ2, H2AZ1	ENSG00000105968, ENSG00000164032	H2A.Z variant histone 2, H2A.Z variant histone 1	KY053288.1; strain Ind-Pune histone H2A.Z
HVAEP1-G021122	asmbl_67451	0.678093	NA	NA	NA	JX118845.1; 14-3-3 protein
HVAEP1-G018152	asmbl_37746	0.677978	TRMT2A, TRMT2B	ENSG00000099899, ENSG00000188917	tRNA methyltransferase 2 homolog A, tRNA methyltransferase 2 homolog B	NA
HVAEP1-G019183	asmbl_89641	0.67763	TYW1, TYW1B	ENSG00000198874, ENSG00000277149	tRNA-yW synthesizing protein 1 homolog, tRNA-yW synthesizing protein 1 homolog B	NA
HVAEP1-G003694	asmbl_40499	0.677577	Y6B3B.7	WBGene00012391	hypothetical protein	NA
HVAEP1-G008557	asmbl_38719	0.677359	NA	NA	NA	NA
HVAEP1-G017399	asmbl_90430	0.677311	NA	NA	NA	NA
HVAEP1-G021920	asmbl_69726	0.677242	mus312	FBgn0002909	NA	NA
HVAEP1-G013757	asmbl_88527	0.677096	NA	NA	NA	NA
HVAEP1-G022929	asmbl_50624	0.676102	FIP1L1	ENSG00000145216	factor interacting with PAPOLA and CPSF1	NA
HVAEP1-G002339	asmbl_54151	0.675643	NDN, NDN, TRO, MAGED2, MAGED4B, MAGED4, MAGED1, MAGEL2, MAGEL2, NSMCE3, NSMCE3, MAGEF1, MAGEE1, MAGEB10, MAGEB5, MAGEB3, MAGEB4, MAGEB1, MAGEB2, MAGEB17, MAGEB6B, MAGEB6, MAGEB18, MAGEB16, MAGEA11, MAGEA9B, MAGEA9, MAGEA8, MAGEA3, MAGEA6, MAGEA2B, MAGEA2, MAGEA12, MAGEA4, MAGEA1, MAGEA10, MAGEC2, MAGEC3, MAGEC1	ENSG00000288364, ENSG00000182636, ENSG00000067445, ENSG00000102316, ENSG00000187243, ENSG00000154545, ENSG00000179222, ENSG00000288188, ENSG00000254585, ENSG00000282130, ENSG00000185115, ENSG00000177383, ENSG00000198934, ENSG00000177689, ENSG00000188408, ENSG00000198798, ENSG00000120289, ENSG00000214107, ENSG00000099399, ENSG00000182798, ENSG00000232030, ENSG00000176746, ENSG00000176774, ENSG0000…	NSE3 homolog, SMC5-SMC6 complex component, MAGE family member L2, necdin, MAGE family member, MAGE family member D2, trophinin, MAGE family member B2, MAGE family member B4, MAGE family member B17, MAGE family member B16, MAGE family member B10, MAGE family member D1, MAGE family member B18, , MAGE family member B6, MAGE family member B5, MAGE family member B1, MAGE family member B3, MAGE family …	NA
HVAEP1-G011292	asmbl_33811	0.675612	SSR3	ENSG00000114850	signal sequence receptor subunit 3	NA
HVAEP1-G026737	asmbl_21770	0.675293	RAB7A	ENSG00000075785	RAB7A, member RAS oncogene family	NA
HVAEP1-G010465	asmbl_68626	0.674645	NA	NA	NA	NA
HVAEP1-G004223	CLYHEMG006642	0.674495	PTCD3	ENSG00000132300	pentatricopeptide repeat domain 3	NA
HVAEP1-G006010	CLYHEMG022073	0.674277	NA	NA	NA	NA
HVAEP1-G028559	asmbl_82937	0.672045	USP29, USP26, USP37	ENSG00000131864, ENSG00000134588, ENSG00000135913	ubiquitin specific peptidase 26, ubiquitin specific peptidase 29, ubiquitin specific peptidase 37	NA
HVAEP1-G011383	asmbl_89231	0.671441	NA	NA	NA	NA
HVAEP1-G019106	asmbl_35783	0.671049	CORO1A, CORO1B, CORO1C, CORO6	ENSG00000102879, ENSG00000172725, ENSG00000110880, ENSG00000167549	coronin 1A, coronin 1C, coronin 1B, coronin 6	NA
HVAEP1-G013929	asmbl_22679	0.671012	DDX47	ENSG00000213782	DEAD-box helicase 47	NA
HVAEP1-G013463	asmbl_79524	0.670899	DEPDC1B, DEPDC1, DEPDC7, DEPDC4	ENSG00000035499, ENSG00000024526, ENSG00000121690, ENSG00000166153	DEP domain containing 1B, DEP domain containing 7, DEP domain containing 4, DEP domain containing 1	NA
HVAEP1-G018290	CLYHEMG011605	0.670829	MCM7	ENSG00000166508	minichromosome maintenance complex component 7	NA
HVAEP1-G021198	asmbl_78428	0.670456	NA	NA	NA	NA
HVAEP1-G023231	asmbl_59831	0.670112	MRPS31	ENSG00000102738	mitochondrial ribosomal protein S31	NA
HVAEP1-G018295	CLYHEMG024595	0.669958	RPA1	ENSG00000132383	replication protein A1	NA
HVAEP1-G011404	asmbl_48809	0.667845	TMEM201	ENSG00000188807	transmembrane protein 201	NA
HVAEP1-G012103	asmbl_20423	0.667437	EPRS1	ENSG00000136628	glutamyl-prolyl-tRNA synthetase 1	NA
HVAEP1-G001093	asmbl_80252	0.664999	PROSER3	ENSG00000167595	proline and serine rich 3	NA
HVAEP1-G026983	asmbl_1870	0.664056	SSR4	ENSG00000180879	signal sequence receptor subunit 4	NA
HVAEP1-G000993	asmbl_63368	0.663024	POLD3	ENSG00000077514	DNA polymerase delta 3, accessory subunit	NA
HVAEP1-G019074	asmbl_21576	0.662734	EMG1	ENSG00000126749	EMG1 N1-specific pseudouridine methyltransferase	NA
HVAEP1-G025721	asmbl_59486	0.662474	UHRF1, UHRF2	ENSG00000276043, ENSG00000147854	ubiquitin like with PHD and ring finger domains 2, ubiquitin like with PHD and ring finger domains 1	NA
HVAEP1-G020713	asmbl_90726	0.662417	NA	NA	NA	NA
HVAEP1-G004343	asmbl_24526	0.662036	SNRNP70	ENSG00000104852	small nuclear ribonucleoprotein U1 subunit 70	NA
HVAEP1-G027223	asmbl_51598	0.660872	UTP4, UTP4	ENSG00000262788, ENSG00000141076	UTP4 small subunit processome component	NA
HVAEP1-G010737	asmbl_59557	0.660259	SLC7A14	ENSG00000013293	solute carrier family 7 member 14	NA
HVAEP1-G009983	asmbl_56994	0.660251	PLK1	ENSG00000166851	polo like kinase 1	NA
HVAEP1-G016441	asmbl_62977	0.660227	NA	NA	NA	NA
HVAEP1-G025719	asmbl_20249	0.659465	UBAP1, UBAP1L	ENSG00000165006, ENSG00000246922	ubiquitin associated protein 1, ubiquitin associated protein 1 like	NA
HVAEP1-G011242	asmbl_85989	0.659392	MYL9, MYL12B, MYL12A	ENSG00000101335, ENSG00000118680, ENSG00000101608	myosin light chain 12A, myosin light chain 12B, myosin light chain 9	NA
HVAEP1-G006724	asmbl_35015	0.658453	NA	NA	NA	NA
HVAEP1-G022282	asmbl_50932	0.658255	SMARCA5, SMARCA1	ENSG00000153147, ENSG00000102038	SWI/SNF related, matrix associated, actin dependent regulator of chromatin, subfamily a, member 1, SWI/SNF related, matrix associated, actin dependent regulator of chromatin, subfamily a, member 5	NA
HVAEP1-G028434	asmbl_63110	0.65751	LSM14B, LSM14A, LSM14A	ENSG00000149657, ENSG00000262860, ENSG00000257103	LSM14A mRNA processing body assembly factor, LSM family member 14B	NA
HVAEP1-G017833	asmbl_71929	0.656588	NLK	ENSG00000087095	nemo like kinase	NA
HVAEP1-G001533	asmbl_23132	0.656285	GGT5, GGTLC3, GGT2, GGTLC1, GGT1, GGTLC2	ENSG00000099998, ENSG00000274252, ENSG00000133475, ENSG00000149435, ENSG00000100031, ENSG00000100121	gamma-glutamyltransferase 2, gamma-glutamyltransferase light chain family member 3, gamma-glutamyltransferase light chain 2, gamma-glutamyltransferase light chain 1, gamma-glutamyltransferase 1, gamma-glutamyltransferase 5	NA
HVAEP1-G002485	asmbl_89759	0.656176	LAS1L	ENSG00000001497	LAS1 like ribosome biogenesis factor	NA
HVAEP1-G005746	asmbl_26194	0.656157	RPF2	ENSG00000197498	ribosome production factor 2 homolog	NA
HVAEP1-G001603	asmbl_81648	0.654552	APP, APLP1, APLP2	ENSG00000142192, ENSG00000105290, ENSG00000084234	amyloid beta precursor protein, amyloid beta precursor like protein 1, amyloid beta precursor like protein 2	NA
HVAEP1-G017780	asmbl_23737	0.654499	PPP1CA, PPP1CC	ENSG00000172531, ENSG00000186298	protein phosphatase 1 catalytic subunit gamma, protein phosphatase 1 catalytic subunit alpha	NA
HVAEP1-G004908	asmbl_40345	0.65437	KIF14	ENSG00000118193	kinesin family member 14	NA
HVAEP1-G017595	asmbl_14782	0.653207	NCL	ENSG00000115053	nucleolin	NA
HVAEP1-G001505	asmbl_27891	0.652597	DDX6	ENSG00000110367	DEAD-box helicase 6	NA
HVAEP1-G007974	asmbl_38804	0.652433	TBL3	ENSG00000183751	transducin beta like 3	NA
HVAEP1-G004850	asmbl_19496	0.651902	NA	NA	NA	NA
HVAEP1-G018504	asmbl_77020	0.651812	TXNDC17	ENSG00000129235	thioredoxin domain containing 17	NA
HVAEP1-G012019	asmbl_33387	0.651636	MEPCE	ENSG00000146834	methylphosphate capping enzyme	NA
HVAEP1-G023639	asmbl_23996	0.651319	NA	NA	NA	NA
HVAEP1-G024820	asmbl_72594	0.651175	NCBP1	ENSG00000136937	nuclear cap binding protein subunit 1	NA
HVAEP1-G014415	asmbl_24105	0.65096	KIF19	ENSG00000196169	kinesin family member 19	NA
HVAEP1-G004138	asmbl_12996	0.650952	NA	NA	NA	NA
HVAEP1-G023705	asmbl_23965	0.650582	MYCN, MYC, MYCL	ENSG00000134323, ENSG00000136997, ENSG00000116990	MYCN proto-oncogene, bHLH transcription factor, MYC proto-oncogene, bHLH transcription factor, MYCL proto-oncogene, bHLH transcription factor	GU199337.1; Myc2
HVAEP1-G010825	asmbl_51131	0.650553	ZK616.8	WBGene00022778	hypothetical protein	NA
HVAEP1-G012648	asmbl_11496	0.650432	NA	NA	NA	NA
HVAEP1-G004341	asmbl_24532	0.649997	SLC39A7, SLC39A7, SLC39A7, SLC39A7, SLC39A7, SLC39A7	ENSG00000227402, ENSG00000229802, ENSG00000224399, ENSG00000206288, ENSG00000226614, ENSG00000112473	solute carrier family 39 member 7	NA
HVAEP1-G023308	asmbl_73677	0.649261	NA	NA	NA	NA
HVAEP1-G028132	asmbl_43993	0.649151	NOP9, NOP9	ENSG00000285326, ENSG00000196943	NOP9 nucleolar protein	NA
HVAEP1-G011546	asmbl_90357	0.648973	FOXJ3, FOXJ2	ENSG00000198815, ENSG00000065970	forkhead box J2, forkhead box J3	NA
HVAEP1-G006999	asmbl_85798	0.648399	DBNL, DBN1	ENSG00000136279, ENSG00000113758	drebrin like, drebrin 1	NA
HVAEP1-G006900	asmbl_22237	0.648107	SIVA1	ENSG00000184990	SIVA1 apoptosis inducing factor	NA
HVAEP1-G018435	CLYHEMG006840	0.647952	ARPC3	ENSG00000111229	actin related protein 2/3 complex subunit 3	NA
HVAEP1-G004864	asmbl_42398	0.647884	PRMT3	ENSG00000185238	protein arginine methyltransferase 3	NA
HVAEP1-G015725	asmbl_66850	0.647611	NA	NA	NA	NA
HVAEP1-G006666	asmbl_24294	0.647366	SYNCRIP, HNRNPR, HNRNPR	ENSG00000135316, ENSG00000282958, ENSG00000125944	heterogeneous nuclear ribonucleoprotein R, synaptotagmin binding cytoplasmic RNA interacting protein	NA
HVAEP1-G018337	asmbl_86983	0.647092	UBE2L3, UBE2L5	ENSG00000185651, ENSG00000236444	ubiquitin conjugating enzyme E2 L5, ubiquitin conjugating enzyme E2 L3	NA
HVAEP1-G008253	asmbl_47150	0.646878	CAP2, CAP1	ENSG00000112186, ENSG00000131236	cyclase associated actin cytoskeleton regulatory protein 2, cyclase associated actin cytoskeleton regulatory protein 1	NA
HVAEP1-G013741	asmbl_47722	0.646339	NA	NA	NA	NA
HVAEP1-G005981	asmbl_53918	0.645821	CDC5L	ENSG00000096401	cell division cycle 5 like	NA
HVAEP1-G011583	CLYHEMG008489	0.645777	NA	NA	NA	NA
HVAEP1-G020155	asmbl_78393	0.645525	NA	NA	NA	NA
HVAEP1-G018685	asmbl_77085	0.645128	NA	NA	NA	NA
HVAEP1-G023683	asmbl_63596	0.644944	PRPF40B, PRPF40A	ENSG00000110844, ENSG00000196504	pre-mRNA processing factor 40 homolog B, pre-mRNA processing factor 40 homolog A	NA
HVAEP1-G011487	CLYHEMG010818	0.644465	NA	NA	NA	NA
HVAEP1-G006439	asmbl_27745	0.644375	EIF3A	ENSG00000107581	eukaryotic translation initiation factor 3 subunit A	NA
HVAEP1-G023131	asmbl_45858	0.643792	EIF3H	ENSG00000147677	eukaryotic translation initiation factor 3 subunit H	NA
HVAEP1-G022580	asmbl_10927	0.642895	DNTTIP2	ENSG00000067334	deoxynucleotidyltransferase terminal interacting protein 2	NA
HVAEP1-G021510	CLYHEMG002990	0.642889	WDR36	ENSG00000134987	WD repeat domain 36	NA
HVAEP1-G005720	asmbl_4236	0.641478	IFT88	ENSG00000032742	intraflagellar transport 88	NA
HVAEP1-G026443	asmbl_21860	0.640971	NA	NA	NA	NA
HVAEP1-G022611	asmbl_3985	0.640934	DMRTA1, DMRTA2	ENSG00000176399, ENSG00000142700	DMRT like family A1, DMRT like family A2	NA
HVAEP1-G026144	asmbl_24182	0.640807	BTF3L4, BTF3	ENSG00000134717, ENSG00000145741	basic transcription factor 3, basic transcription factor 3 like 4	NA
HVAEP1-G012923	asmbl_28401	0.640615	NA	NA	NA	NA
HVAEP1-G022096	asmbl_67994	0.640153	CRAMP1	ENSG00000007545	cramped chromatin regulator homolog 1	NA
HVAEP1-G011213	asmbl_10922	0.639071	NA	NA	NA	NA
HVAEP1-G027854	asmbl_42684	0.638287	NA	NA	NA	NA
HVAEP1-G023037	asmbl_86838	0.637793	NA	NA	NA	NA
HVAEP1-G021806	asmbl_827	0.637633	ALDH16A1	ENSG00000161618	aldehyde dehydrogenase 16 family member A1	NA
HVAEP1-G006441	asmbl_2131	0.636899	MCMBP	ENSG00000197771	minichromosome maintenance complex binding protein	NA
HVAEP1-G016352	CLYHEMG020584	0.635776	NA	NA	NA	NA
HVAEP1-G022025	asmbl_58711	0.635662	SDCBP2, SDCBP	ENSG00000125775, ENSG00000137575	syndecan binding protein 2, syndecan binding protein	NA
HVAEP1-G020169	asmbl_68329	0.635651	API5	ENSG00000166181	apoptosis inhibitor 5	NA
HVAEP1-G027574	asmbl_91201	0.634591	DDX27	ENSG00000124228	DEAD-box helicase 27	NA
HVAEP1-G026580	asmbl_74917	0.634439	NRF1	ENSG00000106459	nuclear respiratory factor 1	NA
HVAEP1-G026218	asmbl_51350	0.634273	ELAVL2, ELAVL3, ELAVL4, ELAVL1	ENSG00000107105, ENSG00000196361, ENSG00000162374, ENSG00000066044	ELAV like RNA binding protein 2, ELAV like RNA binding protein 1, ELAV like RNA binding protein 3, ELAV like RNA binding protein 4	NA
HVAEP1-G018085	asmbl_26142	0.63405	APPBP2	ENSG00000062725	amyloid beta precursor protein binding protein 2	NA
HVAEP1-G010741	asmbl_65614	0.632985	NA	NA	NA	NA
HVAEP1-G027919	asmbl_29538	0.632977	CDT1	ENSG00000167513	chromatin licensing and DNA replication factor 1	NA
HVAEP1-G021353	asmbl_70045	0.632792	BHLHA15, BHLHE23, BHLHE22, OLIG1, OLIG3, OLIG2	ENSG00000180535, ENSG00000125533, ENSG00000180828, ENSG00000184221, ENSG00000177468, ENSG00000205927	oligodendrocyte transcription factor 2, oligodendrocyte transcription factor 1, basic helix-loop-helix family member e23, basic helix-loop-helix family member e22, basic helix-loop-helix family member a15, oligodendrocyte transcription factor 3	NA
HVAEP1-G008284	asmbl_54962	0.632552	C8orf34	ENSG00000165084	chromosome 8 open reading frame 34	NA
HVAEP1-G017468	asmbl_13063	0.632291	K03A1.4	WBGene00019352	hypothetical protein	NA
HVAEP1-G019620	asmbl_28504	0.631952	SF3A1	ENSG00000099995	splicing factor 3a subunit 1	NA
HVAEP1-G016778	asmbl_7731	0.631933	NA	NA	NA	NA
HVAEP1-G012100	asmbl_5006	0.631454	NA	NA	NA	NA
HVAEP1-G026419	asmbl_32674	0.630988	NA	NA	NA	NA
HVAEP1-G020171	asmbl_68335	0.630941	TIMM29	ENSG00000142444	translocase of inner mitochondrial membrane 29	NA
HVAEP1-G011398	asmbl_75025	0.63091	NA	NA	NA	NA
HVAEP1-G008795	asmbl_20641	0.630076	Ofcc1	ENSMUSG00000047094	orofacial cleft 1 candidate 1	NA
HVAEP1-G025456	asmbl_25077	0.629653	CG42529, 76Ca	FBgn0260434, FBgn0036905	NA	NA
HVAEP1-G026361	asmbl_21758	0.629611	NA	NA	NA	NA
HVAEP1-G006365	asmbl_12662	0.62897	KIF11	ENSG00000138160	kinesin family member 11	NA
HVAEP1-G006122	asmbl_50085	0.628872	RUNX3, RUNX1, RUNX2	ENSG00000020633, ENSG00000159216, ENSG00000124813	RUNX family transcription factor 1, uncharacterized LOC100506403, RUNX family transcription factor 2, RUNX family transcription factor 3	EU877199.1; Runx
HVAEP1-G027788	asmbl_83556	0.628641	NA	NA	NA	NA
HVAEP1-G005619	asmbl_66476	0.628493	ZNF367	ENSG00000165244	zinc finger protein 367	NA
HVAEP1-G025383	asmbl_48495	0.628398	ZFR2, ZFR, STRBP, ILF3	ENSG00000105278, ENSG00000056097, ENSG00000165209, ENSG00000129351	zinc finger RNA binding protein 2, zinc finger RNA binding protein, spermatid perinuclear RNA binding protein, interleukin enhancer binding factor 3	NA
HVAEP1-G027913	asmbl_1588	0.628368	SUPT16H	ENSG00000092201	SPT16 homolog, facilitates chromatin remodeling subunit	NA
HVAEP1-G001551	asmbl_28185	0.627899	NA	NA	NA	NA
HVAEP1-G016766	asmbl_82048	0.626881	dbl-1	WBGene00000936	DPP/BMP-Like	AB823952.1; HmaBmp2/4 for bone morphogenetic protein 2/4
HVAEP1-G022972	asmbl_36145	0.626735	TSR1	ENSG00000167721	TSR1 ribosome maturation factor	NA
HVAEP1-G005874	asmbl_22244	0.626435	SAC3D1	ENSG00000168061	SAC3 domain containing 1	NA
HVAEP1-G016935	asmbl_52227	0.626344	MTA1, MTA3, MTA2	ENSG00000182979, ENSG00000057935, ENSG00000149480	metastasis associated 1, metastasis associated 1 family member 2, metastasis associated 1 family member 3	NA
HVAEP1-G002340	asmbl_41154	0.626224	NA	NA	NA	NA
HVAEP1-G013197	CLYHEMG015040	0.626167	NA	NA	NA	NA
HVAEP1-G022294	asmbl_35176	0.626137	NA	NA	NA	NA
HVAEP1-G020649	asmbl_78424	0.625468	NA	NA	NA	KR024036.1; cnidoin
HVAEP1-G024427	asmbl_84852	0.625382	MEX3A, MEX3D, MEX3C, MEX3B	ENSG00000254726, ENSG00000181588, ENSG00000176624, ENSG00000183496	mex-3 RNA binding family member C, mex-3 RNA binding family member D, mex-3 RNA binding family member B, mex-3 RNA binding family member A	NA
HVAEP1-G004340	asmbl_83044	0.625229	WHRN	ENSG00000095397	whirlin	NA
HVAEP1-G009446	asmbl_70710	0.625207	NA	NA	NA	NA
HVAEP1-G004110	asmbl_6250	0.623703	KAT14	ENSG00000149474	lysine acetyltransferase 14	NA
HVAEP1-G026526	asmbl_4776	0.623555	NA	NA	NA	NA
HVAEP1-G005553	asmbl_23066	0.623076	EAPP	ENSG00000129518	E2F associated phosphoprotein	NA
HVAEP1-G024660	asmbl_52795	0.622869	SNUPN	ENSG00000169371	snurportin 1	NA
HVAEP1-G018236	asmbl_50443	0.622321	TAF15, TAF15, FUS, EWSR1	ENSG00000276833, ENSG00000270647, ENSG00000089280, ENSG00000182944	TATA-box binding protein associated factor 15, EWS RNA binding protein 1, FUS RNA binding protein	NA
HVAEP1-G021517	asmbl_76073	0.621153	NA	NA	NA	NA
HVAEP1-G005864	asmbl_62417	0.620769	FANCI	ENSG00000140525	FA complementation group I	NA
HVAEP1-G011811	asmbl_65659	0.620285	HDLBP	ENSG00000115677	high density lipoprotein binding protein	NA
HVAEP1-G012889	asmbl_58534	0.619547	CARM1	ENSG00000142453	coactivator associated arginine methyltransferase 1	AF418560.1; arginine methyltransferase
HVAEP1-G018453	asmbl_12745	0.619339	NA	NA	NA	NA
HVAEP1-G020727	asmbl_69446	0.619179	NA	NA	NA	NA
HVAEP1-G020207	asmbl_30978	0.618903	ETV5, ETV1, ETV4	ENSG00000244405, ENSG00000006468, ENSG00000175832	ETS variant transcription factor 1, ETS variant transcription factor 4, ETS variant transcription factor 5	NA
HVAEP1-G022136	asmbl_53822	0.618661	WDR82	ENSG00000164091	WD repeat domain 82	NA
HVAEP1-G001458	asmbl_18875	0.618018	NFRKB	ENSG00000170322	nuclear factor related to kappaB binding protein	NA
HVAEP1-G007751	asmbl_90861	0.617479	NA	NA	NA	NA
HVAEP1-G012849	asmbl_70561	0.617297	CALR	ENSG00000179218	calreticulin	NA
HVAEP1-G013060	CLYHEMG020378	0.617142	NOC4L, NOC4L	ENSG00000288146, ENSG00000184967	nucleolar complex associated 4 homolog	NA
HVAEP1-G009540	asmbl_56527	0.616857	NA	NA	NA	NA
HVAEP1-G009401	asmbl_61308	0.616743	SLBP	ENSG00000163950	stem-loop binding protein	NA
HVAEP1-G004907	asmbl_40379	0.616616	NUCB1, NUCB2	ENSG00000104805, ENSG00000070081	nucleobindin 2, nucleobindin 1	NA
HVAEP1-G022652	asmbl_39835	0.616613	DLGAP5	ENSG00000126787	DLG associated protein 5	NA
HVAEP1-G026217	CLYHEMG016402	0.616015	ELOF1	ENSG00000130165	elongation factor 1 homolog	NA
HVAEP1-G001606	asmbl_27916	0.615852	DKC1	ENSG00000130826	dyskerin pseudouridine synthase 1	NA
HVAEP1-G024507	asmbl_75278	0.615828	CHD1, CHD2	ENSG00000153922, ENSG00000173575	chromodomain helicase DNA binding protein 1, chromodomain helicase DNA binding protein 2	NA
HVAEP1-G022412	asmbl_58669	0.615732	RPN1	ENSG00000163902	ribophorin I	NA
HVAEP1-G021149	asmbl_17327	0.615677	DBF4, DBF4B	ENSG00000006634, ENSG00000161692	DBF4 zinc finger, DBF4 zinc finger B	NA
HVAEP1-G020129	asmbl_84724	0.615484	WDR75	ENSG00000115368	WD repeat domain 75	NA
HVAEP1-G008293	asmbl_76872	0.614883	GEN1	ENSG00000178295	GEN1 Holliday junction 5' flap endonuclease	NA
HVAEP1-G021054	asmbl_45112	0.614776	ARHGAP23, ARHGAP23, ARHGAP21	ENSG00000273780, ENSG00000275832, ENSG00000107863	Rho GTPase activating protein 23, Rho GTPase activating protein 21	NA
HVAEP1-G014697	asmbl_40076	0.613774	SRSF8, SRSF2	ENSG00000263465, ENSG00000161547	serine and arginine rich splicing factor 2, serine and arginine rich splicing factor 8	NA
HVAEP1-G021506	CLYHEMG010514	0.613742	NA	NA	NA	NA
HVAEP1-G016321	asmbl_66874	0.613694	SPDYC, SPDYA	ENSG00000204710, ENSG00000163806	speedy/RINGO cell cycle regulator family member A, speedy/RINGO cell cycle regulator family member C	NA
HVAEP1-G027802	asmbl_3254	0.613186	PRDX6	ENSG00000117592	peroxiredoxin 6	NA
HVAEP1-G021686	asmbl_35966	0.613139	ST13	ENSG00000100380	ST13 Hsp70 interacting protein	NA
HVAEP1-G022072	asmbl_85433	0.61305	DIS3	ENSG00000083520	DIS3 homolog, exosome endoribonuclease and 3'-5' exoribonuclease	NA
HVAEP1-G023659	asmbl_4051	0.612363	COX5B	ENSG00000135940	cytochrome c oxidase subunit 5B	NA
HVAEP1-G003907	asmbl_14646	0.612258	ZIC1, ZIC3, ZIC2, ZIC4, ZIC5	ENSG00000152977, ENSG00000156925, ENSG00000043355, ENSG00000174963, ENSG00000139800	Zic family member 2, Zic family member 5, Zic family member 3, Zic family member 1, Zic family member 4	JQ994214.1; transcription factor Zic3
HVAEP1-G020965	asmbl_17086	0.611912	NA	NA	NA	NA
HVAEP1-G017436	asmbl_76684	0.611722	CG7504	FBgn0035842	NA	NA
HVAEP1-G018381	asmbl_89683	0.610899	RBM19	ENSG00000122965	RNA binding motif protein 19	NA
HVAEP1-G008610	asmbl_82204	0.610678	NA	NA	NA	NA
HVAEP1-G010800	asmbl_20536	0.610189	NA	NA	NA	NA
HVAEP1-G003944	asmbl_88513	0.610156	AK5, AK1	ENSG00000154027, ENSG00000106992	adenylate kinase 1, adenylate kinase 5	NA
HVAEP1-G009984	asmbl_46076	0.609734	NA	NA	NA	NA
HVAEP1-G017981	asmbl_53006	0.609193	MNT	ENSG00000070444	MAX network transcriptional repressor	NA
HVAEP1-G001134	asmbl_65077	0.608505	NAA50	ENSG00000121579	N-alpha-acetyltransferase 50, NatE catalytic subunit	NA
HVAEP1-G005330	asmbl_24434	0.608272	nfya-1, nfya-2	WBGene00011614, WBGene00043056	Nuclear transcription Factor Y, A (alpha) subunit	NA
HVAEP1-G010214	asmbl_10713	0.608259	FAM199X	ENSG00000123575	family with sequence similarity 199, X-linked	NA
HVAEP1-G018120	asmbl_41770	0.607974	GAS2L1, GAS2L2	ENSG00000185340, ENSG00000270765	growth arrest specific 2 like 1, growth arrest specific 2 like 2	NA
HVAEP1-G006728	asmbl_35421	0.607558	EGR1, EGR3, EGR2	ENSG00000120738, ENSG00000179388, ENSG00000122877	early growth response 2, early growth response 3, early growth response 1	NA
HVAEP1-G019718	asmbl_45276	0.607469	RIF1	ENSG00000080345	replication timing regulatory factor 1	NA
HVAEP1-G018878	asmbl_19721	0.607346	PIWIL1, PIWIL1, PIWIL3, PIWIL4	ENSG00000275051, ENSG00000125207, ENSG00000184571, ENSG00000134627	piwi like RNA-mediated gene silencing 1, piwi like RNA-mediated gene silencing 3, piwi like RNA-mediated gene silencing 4	JX118847.1; PIWI
HVAEP1-G008730	asmbl_42012	0.606984	NA	NA	NA	NA
HVAEP1-G018428	asmbl_63678	0.606869	NA	NA	NA	NA
HVAEP1-G010867	asmbl_89176	0.606798	NA	NA	NA	NA
HVAEP1-G014553	asmbl_32480	0.606614	crc	FBgn0000370	NA	NA
HVAEP1-G002165	asmbl_41088	0.605324	KY	ENSG00000174611	kyphoscoliosis peptidase	NA
HVAEP1-G002384	asmbl_36800	0.604932	SAP130	ENSG00000136715	Sin3A associated protein 130	NA
HVAEP1-G023760	asmbl_9358	0.60479	JADE1, JADE2, JADE3	ENSG00000077684, ENSG00000043143, ENSG00000102221	jade family PHD finger 3, jade family PHD finger 1, jade family PHD finger 2	NA
HVAEP1-G004381	asmbl_65341	0.60449	ODF2, ODF2L	ENSG00000136811, ENSG00000122417	outer dense fiber of sperm tails 2, outer dense fiber of sperm tails 2 like	NA
HVAEP1-G010726	asmbl_53573	0.604457	WDR43	ENSG00000163811	WD repeat domain 43	NA
HVAEP1-G002233	asmbl_12155	0.603731	ARPC1A, ARPC1B	ENSG00000241685, ENSG00000130429	actin related protein 2/3 complex subunit 1B, actin related protein 2/3 complex subunit 1A	NA
HVAEP1-G009174	asmbl_51138	0.603427	YWHAH, YWHAG, YWHAZ, YWHAB, SFN, YWHAQ	ENSG00000128245, ENSG00000170027, ENSG00000164924, ENSG00000166913, ENSG00000175793, ENSG00000134308	tyrosine 3-monooxygenase/tryptophan 5-monooxygenase activation protein eta, tyrosine 3-monooxygenase/tryptophan 5-monooxygenase activation protein beta, tyrosine 3-monooxygenase/tryptophan 5-monooxygenase activation protein theta, tyrosine 3-monooxygenase/tryptophan 5-monooxygenase activation protein zeta, tyrosine 3-monooxygenase/tryptophan 5-monooxygenase activation protein gamma, stratifin	NA
HVAEP1-G008442	asmbl_38334	0.603424	NA	NA	NA	NA
HVAEP1-G006920	asmbl_62531	0.603129	NA	NA	NA	NA
HVAEP1-G024254	asmbl_67394	0.602732	TEX12	ENSG00000150783	testis expressed 12	KC580662.1; testis-expressed sequence protein 12 (Tex12)
HVAEP1-G008896	asmbl_60609	0.602681	SDC3, SDC1, SDC4, SDC2	ENSG00000162512, ENSG00000115884, ENSG00000124145, ENSG00000169439	syndecan 4, syndecan 1, syndecan 2, syndecan 3	NA
HVAEP1-G020830	asmbl_88249	0.60238	GATAD1	ENSG00000157259	GATA zinc finger domain containing 1	NA
HVAEP1-G018427	asmbl_30045	0.601722	NA	NA	NA	NA
HVAEP1-G010794	asmbl_16159	0.600963	NA	NA	NA	NA
HVAEP1-G011251	asmbl_75063	0.600195	PHF14	ENSG00000106443	PHD finger protein 14	NA
HVAEP1-G023644	asmbl_20455	0.600081	TESMIN, LIN54	ENSG00000132749, ENSG00000189308	lin-54 DREAM MuvB core complex component, testis expressed metallothionein like protein	NA
HVAEP1-G019270	asmbl_55936	0.600045	RAN	ENSG00000132341	RAN, member RAS oncogene family	NA
HVAEP1-G028131	asmbl_60073	0.599598	HDHD3	ENSG00000119431	haloacid dehalogenase like hydrolase domain containing 3	NA
HVAEP1-G007527	asmbl_70320	0.598918	NA	NA	NA	NA
HVAEP1-G002334	asmbl_36808	0.598707	MRPL17	ENSG00000158042	mitochondrial ribosomal protein L17	NA
HVAEP1-G003952	asmbl_49280	0.598547	NA	NA	NA	NA
HVAEP1-G011629	asmbl_53607	0.598489	PPIH	ENSG00000171960	peptidylprolyl isomerase H	NA
HVAEP1-G008218	asmbl_47092	0.598201	GCLC	ENSG00000001084	glutamate-cysteine ligase catalytic subunit	NA
HVAEP1-G007769	CLYHEMG006190	0.597612	NA	NA	NA	NA
HVAEP1-G028456	asmbl_21780	0.597358	FAAP24	ENSG00000131944	FA core complex associated protein 24	NA
HVAEP1-G021818	asmbl_79731	0.595849	SNAPC4	ENSG00000165684	small nuclear RNA activating complex polypeptide 4	NA
HVAEP1-G017314	CLYHEMG016456	0.595744	RPA3	ENSG00000106399	replication protein A3	NA
HVAEP1-G007202	asmbl_30411	0.595642	NA	NA	NA	NA
HVAEP1-G016397	asmbl_13563	0.595222	NA	NA	NA	NA
HVAEP1-G002490	asmbl_53512	0.594851	INTS6L, INTS6	ENSG00000165359, ENSG00000102786	integrator complex subunit 6, integrator complex subunit 6 like	NA
HVAEP1-G007157	asmbl_4766	0.594368	rsp-5	WBGene00004702	Probable splicing factor, arginine/serine-rich 5	NA
HVAEP1-G016651	asmbl_945	0.593995	NA	NA	NA	NA
HVAEP1-G017444	asmbl_13579	0.593874	LMAN1L, LMAN1	ENSG00000140506, ENSG00000074695	lectin, mannose binding 1, lectin, mannose binding 1 like	NA
HVAEP1-G005505	asmbl_17982	0.593542	WDR1	ENSG00000071127	WD repeat domain 1	NA
HVAEP1-G018355	asmbl_3718	0.593452	C1QBP	ENSG00000108561	complement C1q binding protein	NA
HVAEP1-G019508	asmbl_64076	0.593184	p23	FBgn0037728	NA	NA
HVAEP1-G025079	asmbl_77927	0.592565	SSR2	ENSG00000163479	signal sequence receptor subunit 2	NA
HVAEP1-G019092	asmbl_32009	0.592332	MORN3	ENSG00000139714	MORN repeat containing 3	NA
HVAEP1-G014688	asmbl_19143	0.592136	SFMBT1, SFMBT2	ENSG00000163935, ENSG00000198879	Scm like with four mbt domains 2, Scm like with four mbt domains 1	NA
HVAEP1-G021684	asmbl_79843	0.591783	NA	NA	NA	NA
HVAEP1-G017481	asmbl_52411	0.591714	POLR1C	ENSG00000171453	RNA polymerase I and III subunit C	NA
HVAEP1-G024975	asmbl_67678	0.591193	KRTCAP2	ENSG00000163463	keratinocyte associated protein 2	NA
HVAEP1-G028770	asmbl_91217	0.591143	DDX31	ENSG00000125485	DEAD-box helicase 31	NA
HVAEP1-G022402	asmbl_36027	0.591129	ANKHD1, ANKHD1-EIF4EBP3, ANKRD17	ENSG00000131503, ENSG00000254996, ENSG00000132466	ankyrin repeat domain 17, ankyrin repeat and KH domain containing 1, ANKHD1-EIF4EBP3 readthrough	NA
HVAEP1-G025688	asmbl_64047	0.59099	HNRNPK	ENSG00000165119	heterogeneous nuclear ribonucleoprotein K	NA
HVAEP1-G023345	asmbl_79854	0.590387	ARID2	ENSG00000189079	AT-rich interaction domain 2	NA
HVAEP1-G020997	asmbl_28369	0.590316	NA	NA	NA	NA
HVAEP1-G005765	asmbl_54019	0.590161	WDR3	ENSG00000065183	WD repeat domain 3	NA
HVAEP1-G013063	asmbl_29630	0.589767	NA	NA	NA	NA
HVAEP1-G004094	asmbl_19872	0.589439	NA	NA	NA	NA
HVAEP1-G019727	asmbl_18675	0.589028	TFCP2L1, TFCP2, UBP1	ENSG00000115112, ENSG00000135457, ENSG00000153560	upstream binding protein 1, transcription factor CP2, transcription factor CP2 like 1	NA
HVAEP1-G020208	asmbl_78645	0.588919	HSPE1	ENSG00000115541	heat shock protein family E (Hsp10) member 1	NA
HVAEP1-G023264	asmbl_39771	0.588471	PLTP, BPIFC, LBP, BPI	ENSG00000100979, ENSG00000184459, ENSG00000129988, ENSG00000101425	bactericidal permeability increasing protein, lipopolysaccharide binding protein, phospholipid transfer protein, BPI fold containing family C	NA
HVAEP1-G021022	asmbl_63998	0.588403	CCT5	ENSG00000150753	chaperonin containing TCP1 subunit 5	NA
HVAEP1-G027634	asmbl_91374	0.587996	IQCE	ENSG00000106012	IQ motif containing E	NA
HVAEP1-G013368	asmbl_91064	0.587823	NANOS1, NANOS2, NANOS3, NANOS3	ENSG00000188613, ENSG00000188425, ENSG00000288505, ENSG00000187556	nanos C2HC-type zinc finger 3, nanos C2HC-type zinc finger 1, nanos C2HC-type zinc finger 2	AB037080.1; Cnnos1 for CNNOS1
HVAEP1-G023331	asmbl_36378	0.587682	BST1, CD38	ENSG00000109743, ENSG00000004468	CD38 molecule, bone marrow stromal cell antigen 1	NA
HVAEP1-G010158	asmbl_61862	0.587118	NRP1, NRP2	ENSG00000099250, ENSG00000118257	neuropilin 1, neuropilin 2	NA
HVAEP1-G001197	asmbl_62911	0.586805	NA	NA	NA	Y15516.1; prdl-b protein, partial
HVAEP1-G012191	asmbl_14961	0.585662	MYL3, MYL4, MYL1, MYL6, MYL6B	ENSG00000160808, ENSG00000198336, ENSG00000168530, ENSG00000092841, ENSG00000196465	myosin light chain 6, myosin light chain 3, myosin light chain 6B, myosin light chain 4, myosin light chain 1	NA
HVAEP1-G014600	CLYHEMG018954	0.585552	NDUFAB1	ENSG00000004779	NADH:ubiquinone oxidoreductase subunit AB1	NA
HVAEP1-G014007	asmbl_22696	0.585385	RPSA	ENSG00000168028	ribosomal protein SA	NA
HVAEP1-G023687	asmbl_81886	0.585123	NA	NA	NA	NA
HVAEP1-G020525	asmbl_78442	0.584852	NA	NA	NA	NA
HVAEP1-G004504	asmbl_86288	0.584619	KMT5B, KMT5C	ENSG00000110066, ENSG00000133247	lysine methyltransferase 5B, lysine methyltransferase 5C	NA
HVAEP1-G017022	asmbl_66854	0.58414	WDR20, DMWD	ENSG00000140153, ENSG00000185800	WD repeat domain 20, DM1 locus, WD repeat containing	NA
HVAEP1-G008413	asmbl_70351	0.583707	PARL	ENSG00000175193	presenilin associated rhomboid like	NA
HVAEP1-G019280	asmbl_75199	0.583467	CCT6B, CCT6A	ENSG00000132141, ENSG00000146731	chaperonin containing TCP1 subunit 6A, chaperonin containing TCP1 subunit 6B	NA
HVAEP1-G010620	asmbl_13926	0.583196	NA	NA	NA	NA
HVAEP1-G003592	CLYHEMG005913	0.58319	NA	NA	NA	NA
HVAEP1-G014399	asmbl_64821	0.583169	SUN3, SPAG4, SUN5, SUN2, SUN1	ENSG00000164744, ENSG00000061656, ENSG00000167098, ENSG00000100242, ENSG00000164828	Sad1 and UNC84 domain containing 2, sperm associated antigen 4, Sad1 and UNC84 domain containing 1, Sad1 and UNC84 domain containing 5, Sad1 and UNC84 domain containing 3	NA
HVAEP1-G003345	asmbl_30094	0.582829	TMEM161A, TMEM161B	ENSG00000064545, ENSG00000164180	transmembrane protein 161A, transmembrane protein 161B	NA
HVAEP1-G027722	asmbl_34824	0.58281	RTTN	ENSG00000176225	rotatin	NA
HVAEP1-G027763	asmbl_62613	0.582681	NOL6	ENSG00000165271	nucleolar protein 6	NA
HVAEP1-G024933	asmbl_52835	0.582242	ZNF609, ZNF608	ENSG00000180357, ENSG00000168916	zinc finger protein 609, zinc finger protein 608	NA
HVAEP1-G014147	asmbl_89608	0.581773	THUMPD1	ENSG00000066654	THUMP domain containing 1	NA
HVAEP1-G021301	asmbl_9606	0.581318	NA	NA	NA	NA
HVAEP1-G017565	asmbl_37495	0.581275	RFX5, RFX7	ENSG00000143390, ENSG00000181827	regulatory factor X7, regulatory factor X5	NA
HVAEP1-G019615	asmbl_69415	0.581074	CDK12, CDK13	ENSG00000167258, ENSG00000065883	cyclin dependent kinase 13, cyclin dependent kinase 12	NA
HVAEP1-G011472	asmbl_65708	0.580613	NA	NA	NA	AF272674.1; dishevelled
HVAEP1-G009325	CLYHEMG020692	0.579757	UMPS	ENSG00000114491	uridine monophosphate synthetase	NA
HVAEP1-G015815	asmbl_89897	0.579728	fncm-1	WBGene00018908	FANCM (Fanconi anemia complex component M) homolog	NA
HVAEP1-G013149	asmbl_29773	0.579149	EFCAB14	ENSG00000159658	EF-hand calcium binding domain 14	NA
HVAEP1-G022185	asmbl_62981	0.578743	NA	NA	NA	NA
HVAEP1-G016130	asmbl_66801	0.578627	CEBPZ	ENSG00000115816	CCAAT enhancer binding protein zeta	NA
HVAEP1-G020163	asmbl_59054	0.578541	KAT2A, KAT2B	ENSG00000108773, ENSG00000114166	lysine acetyltransferase 2B, lysine acetyltransferase 2A	NA
HVAEP1-G026609	asmbl_7438	0.578442	NA	NA	NA	NA
HVAEP1-G010196	asmbl_74520	0.578405	STK31	ENSG00000196335	serine/threonine kinase 31	NA
HVAEP1-G005709	asmbl_14264	0.577927	NA	NA	NA	NA
HVAEP1-G010627	asmbl_90933	0.577855	BCAS2	ENSG00000116752	BCAS2 pre-mRNA processing factor	NA
HVAEP1-G022303	asmbl_41665	0.57742	RRP9	ENSG00000114767	ribosomal RNA processing 9, U3 small nucleolar RNA binding protein	NA
HVAEP1-G017049	asmbl_87770	0.576568	TOMM20	ENSG00000173726	translocase of outer mitochondrial membrane 20	NA
HVAEP1-G025923	asmbl_47232	0.576344	TOPORS	ENSG00000197579	TOP1 binding arginine/serine rich protein, E3 ubiquitin ligase	NA
HVAEP1-G025007	asmbl_81454	0.57621	TRMT112	ENSG00000173113	tRNA methyltransferase subunit 11-2	NA
HVAEP1-G006044	asmbl_62174	0.575989	DNAJB5, DNAJB1, DNAJB4	ENSG00000137094, ENSG00000132002, ENSG00000162616	DnaJ heat shock protein family (Hsp40) member B5, DnaJ heat shock protein family (Hsp40) member B1, DnaJ heat shock protein family (Hsp40) member B4	NA
HVAEP1-G011011	asmbl_65695	0.575881	NA	NA	NA	NA
HVAEP1-G015321	asmbl_23001	0.575393	EIF3D	ENSG00000100353	eukaryotic translation initiation factor 3 subunit D	NA
HVAEP1-G001137	asmbl_17175	0.575293	NIP7	ENSG00000132603	nucleolar pre-rRNA processing protein NIP7	NA
HVAEP1-G010954	asmbl_61061	0.575092	AIP, AIPL1	ENSG00000110711, ENSG00000129221	aryl hydrocarbon receptor interacting protein like 1, aryl hydrocarbon receptor interacting protein	NA
HVAEP1-G018412	asmbl_36513	0.5748	SLC22A18, SLC22A18	ENSG00000276130, ENSG00000110628	solute carrier family 22 member 18	NA
HVAEP1-G027400	asmbl_85883	0.574502	SSR1	ENSG00000124783	signal sequence receptor subunit 1	NA
HVAEP1-G027633	asmbl_90146	0.573558	TAF4, TAF4, TAF4B	ENSG00000280529, ENSG00000130699, ENSG00000141384	TATA-box binding protein associated factor 4, TATA-box binding protein associated factor 4b	NA
HVAEP1-G024760	asmbl_78036	0.573374	BHMT2, BHMT	ENSG00000132840, ENSG00000145692	betaine--homocysteine S-methyltransferase 2, betaine--homocysteine S-methyltransferase	NA
HVAEP1-G006513	asmbl_53749	0.572885	Y32F6A.4, Y4C6B.2, Y18D10A.23, R02F2.8, Y59H11AR.4, F21D12.3	WBGene00012529, WBGene00021156, WBGene00012487, WBGene00019837, WBGene00022012, WBGene00017663	hypothetical protein	NA
HVAEP1-G023381	asmbl_46351	0.572703	PAK1IP1, PAK1IP1	ENSG00000285226, ENSG00000111845	PAK1 interacting protein 1	NA
HVAEP1-G015671	asmbl_55246	0.572682	TTC27	ENSG00000018699	tetratricopeptide repeat domain 27	NA
HVAEP1-G005888	asmbl_69077	0.57254	NA	NA	NA	NA
HVAEP1-G002989	asmbl_60276	0.572264	NA	NA	NA	NA
HVAEP1-G016854	asmbl_14728	0.571857	THADA	ENSG00000115970	THADA armadillo repeat containing	NA
HVAEP1-G017206	asmbl_14759	0.570916	POP4	ENSG00000105171	POP4 homolog, ribonuclease P/MRP subunit	NA
HVAEP1-G018695	asmbl_6907	0.570841	AKAP17A	ENSG00000197976	A-kinase anchoring protein 17A	NA
HVAEP1-G020558	asmbl_68356	0.570261	MTPAP, TUT1	ENSG00000107951, ENSG00000149016	mitochondrial poly(A) polymerase, terminal uridylyl transferase 1, U6 snRNA-specific	NA
HVAEP1-G027589	asmbl_42588	0.569847	NA	NA	NA	NA
HVAEP1-G020887	asmbl_17317	0.569228	NA	NA	NA	NA
HVAEP1-G011208	asmbl_10775	0.568398	PA2G4	ENSG00000170515	proliferation-associated 2G4	NA
HVAEP1-G018314	asmbl_71962	0.567986	NFATC2IP	ENSG00000176953	nuclear factor of activated T cells 2 interacting protein	NA
HVAEP1-G019554	asmbl_7837	0.567537	ATXN7L3B, ATXN7L3	ENSG00000253719, ENSG00000087152	ataxin 7 like 3B, ataxin 7 like 3	NA
HVAEP1-G014739	asmbl_83056	0.566942	EIF3B	ENSG00000106263	eukaryotic translation initiation factor 3 subunit B	NA
HVAEP1-G027522	asmbl_71845	0.566736	ARPC4	ENSG00000241553	actin related protein 2/3 complex subunit 4	NA
HVAEP1-G006326	asmbl_24337	0.566	NA	NA	NA	NA
HVAEP1-G016798	asmbl_87730	0.565719	EIF4A3	ENSG00000141543	eukaryotic translation initiation factor 4A3	NA
HVAEP1-G011454	asmbl_33878	0.565408	PGD	ENSG00000142657	phosphogluconate dehydrogenase	NA
HVAEP1-G013561	CLYHEMG022593	0.565095	MEPCE	ENSG00000146834	methylphosphate capping enzyme	NA
HVAEP1-G016417	asmbl_21952	0.564452	SMAD3, SMAD2	ENSG00000166949, ENSG00000175387	SMAD family member 2, SMAD family member 3	NA
HVAEP1-G022542	asmbl_16690	0.563932	NA	NA	NA	NA
HVAEP1-G023610	asmbl_11261	0.563838	EIF3E	ENSG00000104408	eukaryotic translation initiation factor 3 subunit E	NA
HVAEP1-G020998	CLYHEMG002733	0.563748	METTL2B, METTL2A, METTL8	ENSG00000165055, ENSG00000087995, ENSG00000123600	methyltransferase like 2B, methyltransferase like 2A, methyltransferase like 8	NA
HVAEP1-G007628	CLYHEMG023786	0.56341	DCDC2, DCDC2C, DCDC2B	ENSG00000146038, ENSG00000214866, ENSG00000222046	doublecortin domain containing 2, doublecortin domain containing 2C, doublecortin domain containing 2B	NA
HVAEP1-G011057	asmbl_65603	0.563311	POLH	ENSG00000170734	DNA polymerase eta	NA
HVAEP1-G012742	asmbl_7456	0.562959	SLC25A3	ENSG00000075415	solute carrier family 25 member 3	NA
HVAEP1-G010202	asmbl_66571	0.562884	NA	NA	NA	NA
HVAEP1-G011868	asmbl_75088	0.562562	NA	NA	NA	NA
HVAEP1-G014313	asmbl_83700	0.562382	CCDC154	ENSG00000197599	coiled-coil domain containing 154	NA
HVAEP1-G018719	asmbl_63713	0.562159	NA	NA	NA	NA
HVAEP1-G006474	asmbl_32160	0.560279	NA	NA	NA	NA
HVAEP1-G018956	asmbl_37710	0.560257	DHPS	ENSG00000095059	deoxyhypusine synthase	NA
HVAEP1-G019542	asmbl_32659	0.560029	DMC1	ENSG00000100206	DNA meiotic recombinase 1	AB047581.1; DMC1 homologue CnDMC1
HVAEP1-G003755	asmbl_40352	0.559985	TYMS	ENSG00000176890	thymidylate synthetase	NA
HVAEP1-G026919	asmbl_1830	0.559876	TUBGCP6	ENSG00000128159	tubulin gamma complex associated protein 6	NA
HVAEP1-G003584	asmbl_40311	0.559811	NSMCE4A, EID3	ENSG00000107672, ENSG00000255150	NSE4 homolog A, SMC5-SMC6 complex component, EP300 interacting inhibitor of differentiation 3	NA
HVAEP1-G012448	asmbl_1742	0.55959	WDR61	ENSG00000140395	WD repeat domain 61	NA
HVAEP1-G014374	asmbl_22769	0.559521	BRAT1	ENSG00000106009	BRCA1 associated ATM activator 1	NA
HVAEP1-G028858	asmbl_12134	0.559093	NA	NA	NA	NA
HVAEP1-G027445	asmbl_65450	0.558625	AURKA, AURKB, AURKC	ENSG00000087586, ENSG00000178999, ENSG00000105146	aurora kinase A, aurora kinase C, aurora kinase B	NA
HVAEP1-G001402	asmbl_815	0.55816	BMS1	ENSG00000165733	BMS1 ribosome biogenesis factor	NA
HVAEP1-G022084	asmbl_67997	0.557954	TXNDC9	ENSG00000115514	thioredoxin domain containing 9	NA
HVAEP1-G001363	CLYHEMG004738	0.557894	NA	NA	NA	NA
HVAEP1-G016474	asmbl_2926	0.557513	C12orf45	ENSG00000151131	chromosome 12 open reading frame 45	NA
HVAEP1-G010159	asmbl_46098	0.557125	NA	NA	NA	NA
HVAEP1-G004964	asmbl_49356	0.557069	WDR47	ENSG00000085433	WD repeat domain 47	NA
HVAEP1-G021358	asmbl_33927	0.557045	RPA4, RPA2	ENSG00000204086, ENSG00000117748	replication protein A4, replication protein A2	NA
HVAEP1-G022506	asmbl_36043	0.556945	NA	NA	NA	NA
HVAEP1-G011377	asmbl_16061	0.556473	NA	NA	NA	NA
HVAEP1-G024294	asmbl_75309	0.555842	ANKRD24, RAI14, ANKRD35, UACA	ENSG00000089847, ENSG00000039560, ENSG00000198483, ENSG00000137831	ankyrin repeat domain 24, retinoic acid induced 14, uveal autoantigen with coiled-coil domains and ankyrin repeats, ankyrin repeat domain 35	NA
HVAEP1-G021598	asmbl_46417	0.555143	APOB	ENSG00000084674	apolipoprotein B	NA
HVAEP1-G001819	asmbl_85200	0.555111	PSMC3IP	ENSG00000131470	PSMC3 interacting protein	NA
HVAEP1-G016862	asmbl_64659	0.55511	DDX49	ENSG00000105671	DEAD-box helicase 49	NA
HVAEP1-G004622	asmbl_86319	0.5551	TERB1	ENSG00000249961	telomere repeat binding bouquet formation protein 1	NA
HVAEP1-G028585	asmbl_91369	0.555008	SEPTIN7	ENSG00000122545	septin 7	NA
HVAEP1-G028472	asmbl_91420	0.555008	rbm-3.2	WBGene00011156	RNA Binding Motif protein homolog	NA
HVAEP1-G018373	asmbl_89602	0.554153	CEP20, CEP20	ENSG00000276914, ENSG00000133393	centrosomal protein 20	NA
HVAEP1-G007554	asmbl_59221	0.553875	TBC1D2B, TBC1D2	ENSG00000167202, ENSG00000095383	TBC1 domain family member 2, TBC1 domain family member 2B	NA
HVAEP1-G019560	asmbl_89063	0.553791	ZNHIT6	ENSG00000117174	zinc finger HIT-type containing 6	NA
HVAEP1-G024235	asmbl_45596	0.553488	NA	NA	NA	NA
HVAEP1-G026350	asmbl_47890	0.553282	CG5984	FBgn0039500	NA	NA
HVAEP1-G023169	asmbl_819	0.553001	hcls1	ENSXETG00000015412	hematopoietic cell-specific Lyn substrate 1	NA
HVAEP1-G009835	asmbl_60027	0.552979	NA	NA	NA	NA
HVAEP1-G004987	asmbl_48405	0.552412	NA	NA	NA	NA
HVAEP1-G013277	asmbl_57426	0.552059	RUVBL1, RUVBL1	ENSG00000284901, ENSG00000175792	RuvB like AAA ATPase 1	NA
HVAEP1-G021488	asmbl_23147	0.55201	NA	NA	NA	NA
HVAEP1-G020632	asmbl_72337	0.551564	NA	NA	NA	NA
HVAEP1-G024989	asmbl_18361	0.551404	rnp-4	WBGene00004387	RNA-binding protein 8A	NA
HVAEP1-G004353	CLYHEMG019479	0.550846	ARPC5, ARPC5L	ENSG00000162704, ENSG00000136950	actin related protein 2/3 complex subunit 5 like, actin related protein 2/3 complex subunit 5	NA
HVAEP1-G015580	asmbl_13630	0.550123	ATP6V1D	ENSG00000100554	ATPase H+ transporting V1 subunit D	NA
HVAEP1-G004195	asmbl_36699	0.550089	NA	NA	NA	NA
HVAEP1-G012990	asmbl_51305	0.549877	UBR7, UBR7	ENSG00000278787, ENSG00000012963	ubiquitin protein ligase E3 component n-recognin 7	NA
HVAEP1-G004283	asmbl_63911	0.549619	POFUT1	ENSG00000101346	protein O-fucosyltransferase 1	NA
HVAEP1-G006727	asmbl_62203	0.549355	CCT7	ENSG00000135624	chaperonin containing TCP1 subunit 7	NA
HVAEP1-G022487	asmbl_79112	0.548754	ATP6AP1	ENSG00000071553	ATPase H+ transporting accessory protein 1	NA
HVAEP1-G003582	asmbl_14972	0.548395	NA	NA	NA	NA
HVAEP1-G019722	asmbl_7799	0.548106	NA	NA	NA	NA
HVAEP1-G011774	asmbl_15000	0.547724	NA	NA	NA	NA
HVAEP1-G017658	asmbl_87798	0.547666	SF3B2	ENSG00000087365	splicing factor 3b subunit 2	NA
HVAEP1-G018771	asmbl_44414	0.54752	RNFT2, RNFT1	ENSG00000135119, ENSG00000189050	ring finger protein, transmembrane 2, ring finger protein, transmembrane 1	NA
HVAEP1-G015984	CLYHEMG014899	0.547272	NA	NA	NA	NA
HVAEP1-G009296	asmbl_25785	0.54704	NA	NA	NA	NA
HVAEP1-G021685	asmbl_71299	0.546245	CSRP3, CSRP1, CSRP2	ENSG00000129170, ENSG00000159176, ENSG00000175183	cysteine and glycine rich protein 3, cysteine and glycine rich protein 2, cysteine and glycine rich protein 1	NA
HVAEP1-G018274	asmbl_41751	0.546217	HPD	ENSG00000158104	4-hydroxyphenylpyruvate dioxygenase	NA
HVAEP1-G005432	asmbl_62296	0.546188	RSPH1	ENSG00000160188	radial spoke head component 1	NA
HVAEP1-G016355	asmbl_40601	0.545699	NAA40	ENSG00000110583	N-alpha-acetyltransferase 40, NatD catalytic subunit	NA
HVAEP1-G021841	asmbl_22113	0.545581	RFC3	ENSG00000133119	replication factor C subunit 3	NA
HVAEP1-G023383	asmbl_38521	0.544991	CA11, CA10	ENSG00000063180, ENSG00000154975	carbonic anhydrase 11, carbonic anhydrase 10	NA
HVAEP1-G002019	asmbl_53360	0.544884	TTLL12	ENSG00000100304	tubulin tyrosine ligase like 12	NA
HVAEP1-G001670	asmbl_53312	0.544864	GYG1, GYG2	ENSG00000163754, ENSG00000056998	glycogenin 2, glycogenin 1	NA
HVAEP1-G027282	asmbl_51698	0.544791	RBM28	ENSG00000106344	RNA binding motif protein 28	NA
HVAEP1-G003514	asmbl_21387	0.544375	NA	NA	NA	NA
HVAEP1-G021482	asmbl_3944	0.544345	RIBC2, RIBC1	ENSG00000128408, ENSG00000158423	RIB43A domain with coiled-coils 2, RIB43A domain with coiled-coils 1	NA
HVAEP1-G021425	asmbl_43279	0.544124	HPF1	ENSG00000056050	histone PARylation factor 1	NA
HVAEP1-G016878	asmbl_63613	0.543844	NA	NA	NA	NA
HVAEP1-G009897	asmbl_49796	0.543604	SF3A2	ENSG00000104897	splicing factor 3a subunit 2	NA
HVAEP1-G002154	asmbl_41172	0.543496	DNAJC21	ENSG00000168724	DnaJ heat shock protein family (Hsp40) member C21	NA
HVAEP1-G019559	asmbl_41882	0.543258	NA	NA	NA	NA
HVAEP1-G005707	asmbl_46778	0.543129	jar	FBgn0011225	NA	NA
HVAEP1-G002978	asmbl_71167	0.543036	DUSP12	ENSG00000081721	dual specificity phosphatase 12	NA
HVAEP1-G018084	asmbl_3772	0.542559	tbc-8	WBGene00008018	TBC (Tre-2/Bub2/Cdc16) domain family	NA
HVAEP1-G023954	asmbl_36180	0.54253	NA	NA	NA	NA
HVAEP1-G024953	asmbl_18421	0.542506	PCSK1	ENSG00000175426	proprotein convertase subtilisin/kexin type 1	NA
HVAEP1-G015829	asmbl_62024	0.542317	TOGARAM1, TOGARAM2	ENSG00000198718, ENSG00000189350	TOG array regulator of axonemal microtubules 1, TOG array regulator of axonemal microtubules 2	NA
HVAEP1-G026732	asmbl_68836	0.542267	C15orf65, C9orf116	ENSG00000261652, ENSG00000160345	chromosome 15 open reading frame 65, chromosome 9 open reading frame 116	NA
HVAEP1-G016804	asmbl_80570	0.542229	TTLL12	ENSG00000100304	tubulin tyrosine ligase like 12	NA
HVAEP1-G003456	asmbl_88476	0.542211	LAMC2, LAMC1, LAMC3	ENSG00000058085, ENSG00000135862, ENSG00000050555	laminin subunit gamma 3, laminin subunit gamma 1, laminin subunit gamma 2	NA
HVAEP1-G010088	asmbl_70110	0.541211	NA	NA	NA	NA
HVAEP1-G005029	asmbl_21511	0.540911	KIFAP3	ENSG00000075945	kinesin associated protein 3	NA
HVAEP1-G005959	asmbl_54006	0.540707	PUS1	ENSG00000177192	pseudouridine synthase 1	NA
HVAEP1-G016912	asmbl_26718	0.539976	NA	NA	NA	NA
HVAEP1-G020360	asmbl_80079	0.539954	NAA80	ENSG00000243477	N-alpha-acetyltransferase 80, NatH catalytic subunit	NA
HVAEP1-G015692	CLYHEMG007880	0.539895	C1orf87	ENSG00000162598	chromosome 1 open reading frame 87	NA
HVAEP1-G028878	asmbl_78209	0.539878	INO80B, INO80B-WBP1	ENSG00000115274, ENSG00000274049	INO80 complex subunit B,	NA
HVAEP1-G001650	asmbl_70629	0.539786	cki-1, cki-2	WBGene00000516, WBGene00000517	Cyclin-dependent kinase inhibitor 1, CKI family (Cyclin-dependent Kinase Inhibitor)	NA
HVAEP1-G023487	asmbl_36166	0.539731	TSEN34, TSEN34, TSEN34, TSEN34, TSEN34, TSEN34, TSEN34, TSEN34, TSEN34, TSEN34	ENSG00000275165, ENSG00000274796, ENSG00000278622, ENSG00000274129, ENSG00000278712, ENSG00000278605, ENSG00000274078, ENSG00000273896, ENSG00000274672, ENSG00000170892	tRNA splicing endonuclease subunit 34	NA
HVAEP1-G013739	asmbl_13326	0.53843	NA	NA	NA	NA
HVAEP1-G008435	CLYHEMG003462	0.53815	NA	NA	NA	NA
HVAEP1-G005886	asmbl_34218	0.537827	TRABD	ENSG00000170638	TraB domain containing	NA
HVAEP1-G022352	asmbl_49130	0.537466	MAK, CILK1	ENSG00000111837, ENSG00000112144	male germ cell associated kinase, ciliogenesis associated kinase 1	NA
HVAEP1-G024259	asmbl_77954	0.53718	NA	NA	NA	NA
HVAEP1-G016842	asmbl_66895	0.536804	SNRPD2	ENSG00000125743	small nuclear ribonucleoprotein D2 polypeptide	NA
HVAEP1-G002550	asmbl_34313	0.536681	PIN4	ENSG00000102309	peptidylprolyl cis/trans isomerase, NIMA-interacting 4	NA
HVAEP1-G005825	asmbl_85722	0.536601	TEX11	ENSG00000120498	testis expressed 11	NA
HVAEP1-G003311	asmbl_21270	0.536596	EXOSC2	ENSG00000130713	exosome component 2	NA
HVAEP1-G026586	asmbl_53890	0.535506	ATP5F1C	ENSG00000165629	ATP synthase F1 subunit gamma	NA
HVAEP1-G019226	asmbl_77683	0.535179	NA	NA	NA	NA
HVAEP1-G023237	asmbl_23947	0.534917	OSTC	ENSG00000198856	oligosaccharyltransferase complex non-catalytic subunit	NA
HVAEP1-G018363	CLYHEMG010183	0.534296	XRCC6	ENSG00000196419	X-ray repair cross complementing 6	NA
HVAEP1-G010749	asmbl_28966	0.534265	UXT	ENSG00000126756	ubiquitously expressed prefoldin like chaperone	NA
HVAEP1-G006687	asmbl_48051	0.534205	UTP14C, UTP14A	ENSG00000253797, ENSG00000156697	UTP14C small subunit processome component, UTP14A small subunit processome component	NA
HVAEP1-G004161	asmbl_80137	0.534093	SURF4, SURF4	ENSG00000280951, ENSG00000148248	surfeit 4	NA
HVAEP1-G005134	asmbl_77729	0.534042	REV1	ENSG00000135945	REV1 DNA directed polymerase	NA
HVAEP1-G017420	asmbl_1012	0.533886	TAF8	ENSG00000137413	TATA-box binding protein associated factor 8	NA
HVAEP1-G002991	asmbl_65669	0.533761	NA	NA	NA	NA
HVAEP1-G016274	asmbl_85395	0.533622	DCAF5	ENSG00000139990	DDB1 and CUL4 associated factor 5	NA
HVAEP1-G007767	asmbl_138	0.532879	NA	NA	NA	NA
HVAEP1-G016891	asmbl_80554	0.532479	senju	FBgn0031676	NA	NA
HVAEP1-G004040	CLYHEMG016549	0.532468	DDX24, DDX24	ENSG00000273761, ENSG00000089737	DEAD-box helicase 24	NA
HVAEP1-G021385	asmbl_58687	0.532228	POLR3A	ENSG00000148606	RNA polymerase III subunit A	NA
HVAEP1-G011281	asmbl_59483	0.532198	IFT43	ENSG00000119650	intraflagellar transport 43	NA
HVAEP1-G005473	asmbl_17993	0.53218	NSD2, NSD1, NSD3	ENSG00000109685, ENSG00000165671, ENSG00000147548	nuclear receptor binding SET domain protein 3, nuclear receptor binding SET domain protein 2, nuclear receptor binding SET domain protein 1	NA
HVAEP1-G020919	asmbl_66076	0.531653	MARS1	ENSG00000166986	methionyl-tRNA synthetase 1	NA
HVAEP1-G009285	asmbl_5086	0.531476	LDB2, LDB1	ENSG00000169744, ENSG00000198728	LIM domain binding 2, LIM domain binding 1	NA
HVAEP1-G016133	asmbl_62063	0.531475	symk-1	WBGene00017797	SYMpleKin cleavage and polyadenylation factor	NA
HVAEP1-G022532	asmbl_90134	0.531391	TAF1C	ENSG00000103168	TATA-box binding protein associated factor, RNA polymerase I subunit C	NA
HVAEP1-G006413	asmbl_48045	0.531278	TBX19, TBXT	ENSG00000143178, ENSG00000164458	T-box transcription factor T, T-box transcription factor 19	AY366371.1; brachyury (Bra1)
HVAEP1-G006130	asmbl_50105	0.531178	ZUP1	ENSG00000153975	zinc finger containing ubiquitin peptidase 1	NA
HVAEP1-G006627	asmbl_2137	0.530746	PNRC2, PNRC1	ENSG00000189266, ENSG00000146278	proline rich nuclear receptor coactivator 1, proline rich nuclear receptor coactivator 2	NA
HVAEP1-G006611	asmbl_53758	0.530393	NA	NA	NA	NA
HVAEP1-G022076	asmbl_67972	0.530311	MSL3	ENSG00000005302	MSL complex subunit 3	NA
HVAEP1-G008309	asmbl_41977	0.530292	TRAM1L1, TRAM1, TRAM2	ENSG00000174599, ENSG00000067167, ENSG00000065308	translocation associated membrane protein 1, translocation associated membrane protein 2, translocation associated membrane protein 1 like 1	NA
HVAEP1-G008697	asmbl_16348	0.530181	MAPK9, MAPK10, MAPK8	ENSG00000050748, ENSG00000109339, ENSG00000107643	mitogen-activated protein kinase 8, mitogen-activated protein kinase 10, mitogen-activated protein kinase 9	AY651025.1; c-Jun NH2-terminal kinase
HVAEP1-G015564	asmbl_52340	0.529911	nmur-3, npr-33, npr-15	WBGene00017176, WBGene00009278, WBGene00012084	NeuroPeptide Receptor family, Neuropeptide receptor 15, NMUR (NeuroMedin U Receptor) homolog	NA
HVAEP1-G006341	CLYHEMG012963	0.529507	CG31279	FBgn0051279	NA	NA
HVAEP1-G023348	asmbl_12646	0.529311	RRM2B, RRM2	ENSG00000048392, ENSG00000171848	ribonucleotide reductase regulatory TP53 inducible subunit M2B, ribonucleotide reductase regulatory subunit M2	NA
HVAEP1-G005612	asmbl_74439	0.529011	GDI2, GDI1	ENSG00000057608, ENSG00000203879	GDP dissociation inhibitor 2, GDP dissociation inhibitor 1	NA
HVAEP1-G003980	asmbl_60228	0.529001	MAEA	ENSG00000090316	macrophage erythroblast attacher, E3 ubiquitin ligase	NA
HVAEP1-G011502	asmbl_76369	0.528983	DNAJB11	ENSG00000090520	DnaJ heat shock protein family (Hsp40) member B11	NA
HVAEP1-G007154	asmbl_2211	0.528723	CYB5R4	ENSG00000065615	cytochrome b5 reductase 4	NA
HVAEP1-G006548	asmbl_62231	0.528319	POMGNT2	ENSG00000144647	protein O-linked mannose N-acetylglucosaminyltransferase 2 (beta 1,4-)	NA
HVAEP1-G027099	asmbl_67374	0.528298	NA	NA	NA	NA
HVAEP1-G023537	asmbl_47662	0.527713	MRPS2	ENSG00000122140	mitochondrial ribosomal protein S2	NA
HVAEP1-G001602	asmbl_2408	0.527697	TTC12	ENSG00000149292	tetratricopeptide repeat domain 12	NA
HVAEP1-G003448	asmbl_30569	0.527468	FUBP3, KHSRP, FUBP1	ENSG00000107164, ENSG00000088247, ENSG00000162613	KH-type splicing regulatory protein, far upstream element binding protein 3, far upstream element binding protein 1	NA
HVAEP1-G016377	asmbl_44265	0.527431	AK6, AK6	ENSG00000279247, ENSG00000085231	adenylate kinase 6	NA
HVAEP1-G006440	asmbl_2112	0.527229	CG11498	FBgn0039749	NA	NA
HVAEP1-G024111	asmbl_39396	0.527122	NSFL1C, UBXN2B, UBXN2A	ENSG00000088833, ENSG00000215114, ENSG00000173960	NSFL1 cofactor, UBX domain protein 2B, UBX domain protein 2A	NA
HVAEP1-G024398	asmbl_57632	0.52689	MPHOSPH10	ENSG00000124383	M-phase phosphoprotein 10	NA
HVAEP1-G028133	asmbl_43990	0.526779	BOP1, BOP1	ENSG00000285301, ENSG00000261236	BOP1 ribosomal biogenesis factor	NA
HVAEP1-G013088	asmbl_45942	0.526702	SLC35A3	ENSG00000117620	solute carrier family 35 member A3	NA
HVAEP1-G008779	asmbl_270	0.5267	RAB38, RAB32	ENSG00000123892, ENSG00000118508	RAB32, member RAS oncogene family, RAB38, member RAS oncogene family	NA
HVAEP1-G013790	asmbl_51355	0.526475	RNPS1	ENSG00000205937	RNA binding protein with serine rich domain 1	NA
HVAEP1-G007456	asmbl_28556	0.526388	NA	NA	NA	NA
HVAEP1-G025357	asmbl_37292	0.526082	Y47G6A.5	WBGene00021635	Tyrosine-protein kinase	NA
HVAEP1-G007357	asmbl_60457	0.525757	TCP1	ENSG00000120438	t-complex 1	NA
HVAEP1-G017657	asmbl_55232	0.525387	NA	NA	NA	NA
HVAEP1-G023341	asmbl_34522	0.525072	TEKT2	ENSG00000092850	tektin 2	NA
HVAEP1-G018861	asmbl_37281	0.524592	PRMT5	ENSG00000100462	protein arginine methyltransferase 5	NA
HVAEP1-G016657	asmbl_52363	0.524205	TOP2A, TOP2B	ENSG00000131747, ENSG00000077097	DNA topoisomerase II beta, DNA topoisomerase II alpha	NA
HVAEP1-G004462	asmbl_18158	0.523328	NUP153	ENSG00000124789	nucleoporin 153	NA
HVAEP1-G026347	asmbl_47892	0.522854	TKTL1, TKTL2, TKT	ENSG00000007350, ENSG00000151005, ENSG00000163931	transketolase like 1, transketolase like 2, transketolase	NA
HVAEP1-G000027	asmbl_23860	0.522355	CFAP45	ENSG00000213085	cilia and flagella associated protein 45	NA
HVAEP1-G023570	asmbl_36338	0.522171	NME5	ENSG00000112981	NME/NM23 family member 5	NA
HVAEP1-G009782	asmbl_57384	0.521889	ACAA2	ENSG00000167315	acetyl-CoA acyltransferase 2	NA
HVAEP1-G025404	asmbl_20252	0.521453	PTPN9	ENSG00000169410	protein tyrosine phosphatase non-receptor type 9	NA
HVAEP1-G006946	asmbl_4187	0.521417	VWA5B1, VWA5B2	ENSG00000158816, ENSG00000145198	von Willebrand factor A domain containing 5B1, von Willebrand factor A domain containing 5B2	NA
HVAEP1-G014445	asmbl_32658	0.520382	TPRKB	ENSG00000144034	TP53RK binding protein	NA
HVAEP1-G026371	asmbl_1888	0.519537	PMPCB, UQCRC1	ENSG00000105819, ENSG00000010256	peptidase, mitochondrial processing subunit beta, ubiquinol-cytochrome c reductase core protein 1	NA
HVAEP1-G003824	asmbl_87102	0.518838	SYCP3	ENSG00000139351	synaptonemal complex protein 3	JQ906933.1; synaptonemal complex protein 3 (Sycp3)
HVAEP1-G011863	asmbl_65729	0.518516	RPS26	ENSG00000197728	ribosomal protein S26	NA
HVAEP1-G016120	asmbl_75741	0.518483	NA	NA	NA	NA
HVAEP1-G014095	asmbl_4184	0.518228	ATAD5	ENSG00000176208	ATPase family AAA domain containing 5	NA
HVAEP1-G017984	asmbl_76970	0.518136	MRPL13	ENSG00000172172	mitochondrial ribosomal protein L13	NA
HVAEP1-G014611	asmbl_77195	0.518027	MYOCD, MRTFA, MRTFB	ENSG00000141052, ENSG00000196588, ENSG00000186260	myocardin related transcription factor A, myocardin related transcription factor B, myocardin	NA
HVAEP1-G022376	asmbl_36025	0.517844	DNA2	ENSG00000138346	DNA replication helicase/nuclease 2	NA
HVAEP1-G023350	asmbl_79756	0.517392	MAPRE1, MAPRE2, MAPRE3	ENSG00000101367, ENSG00000166974, ENSG00000084764	microtubule associated protein RP/EB family member 2, microtubule associated protein RP/EB family member 1, microtubule associated protein RP/EB family member 3	NA
HVAEP1-G011397	asmbl_47549	0.51737	DDOST	ENSG00000244038	dolichyl-diphosphooligosaccharide--protein glycosyltransferase non-catalytic subunit	NA
HVAEP1-G012642	asmbl_4653	0.517333	NA	NA	NA	NA
HVAEP1-G019471	asmbl_18680	0.517316	TBCK	ENSG00000145348	TBC1 domain containing kinase	NA
HVAEP1-G004056	asmbl_49253	0.515478	CPSF6, CPSF7	ENSG00000111605, ENSG00000149532	cleavage and polyadenylation specific factor 6, cleavage and polyadenylation specific factor 7	NA
HVAEP1-G002552	CLYHEMG011037	0.515369	RNASEH2B	ENSG00000136104	ribonuclease H2 subunit B	NA
HVAEP1-G019596	asmbl_17047	0.515007	CCDC93	ENSG00000125633	coiled-coil domain containing 93	NA
HVAEP1-G016070	asmbl_66804	0.514746	RAB11B, RAB11A	ENSG00000185236, ENSG00000103769	RAB11A, member RAS oncogene family, RAB11B, member RAS oncogene family	NA
HVAEP1-G015301	asmbl_64553	0.514151	BFAR, BFAR	ENSG00000275618, ENSG00000103429	bifunctional apoptosis regulator	NA
HVAEP1-G024811	asmbl_75350	0.513953	ATP5F1A	ENSG00000152234	ATP synthase F1 subunit alpha	NA
HVAEP1-G014681	asmbl_77160	0.513739	PHF5A	ENSG00000100410	PHD finger protein 5A	NA
HVAEP1-G001426	asmbl_18936	0.513458	RCBTB2, RCBTB1	ENSG00000136161, ENSG00000136144	RCC1 and BTB domain containing protein 1, RCC1 and BTB domain containing protein 2	NA
HVAEP1-G019974	CLYHEMG006485	0.512376	NA	NA	NA	NA
HVAEP1-G014696	CLYHEMG006870	0.512161	MAD1L1	ENSG00000002822	mitotic arrest deficient 1 like 1	NA
HVAEP1-G021404	asmbl_66377	0.512141	TARBP1	ENSG00000059588	TAR (HIV-1) RNA binding protein 1	NA
HVAEP1-G005025	asmbl_71177	0.511343	DXO, DXO, DXO, DXO, DXO, DXO	ENSG00000234798, ENSG00000224313, ENSG00000225682, ENSG00000206346, ENSG00000204348, ENSG00000236765	decapping exoribonuclease	NA
HVAEP1-G027804	asmbl_39407	0.51091	GAS8	ENSG00000141013	growth arrest specific 8	NA
HVAEP1-G025115	asmbl_81402	0.510844	MAU2	ENSG00000129933	MAU2 sister chromatid cohesion factor	NA
HVAEP1-G007035	asmbl_25267	0.510514	RPS6KA2, RPS6KA1, RPS6KA1, RPS6KA3, RPS6KA6	ENSG00000071242, ENSG00000281877, ENSG00000117676, ENSG00000177189, ENSG00000072133	ribosomal protein S6 kinase A1, ribosomal protein S6 kinase A3, ribosomal protein S6 kinase A6, ribosomal protein S6 kinase A2	FR796474.1; ribosomal protein S6 kinase 2 alpha protein (RSK gene), strain Basel
HVAEP1-G017297	asmbl_31464	0.510465	NVL	ENSG00000143748	nuclear VCP like	NA
HVAEP1-G026527	asmbl_4793	0.510413	TMEM209	ENSG00000146842	transmembrane protein 209	NA
HVAEP1-G026390	asmbl_21755	0.509902	ANKMY2	ENSG00000106524	ankyrin repeat and MYND domain containing 2	NA
HVAEP1-G024202	asmbl_32606	0.508523	POLR3C	ENSG00000186141	RNA polymerase III subunit C	NA
HVAEP1-G012008	asmbl_35544	0.508345	PCID2	ENSG00000126226	PCI domain containing 2	NA
HVAEP1-G024550	asmbl_51989	0.508202	SNX2, SNX1	ENSG00000205302, ENSG00000028528	sorting nexin 1, sorting nexin 2	NA
HVAEP1-G022058	asmbl_53810	0.508162	RSBN1L, RSBN1	ENSG00000187257, ENSG00000081019	round spermatid basic protein 1 like, round spermatid basic protein 1	NA
HVAEP1-G016579	asmbl_946	0.508106	OTUB1, OTUB2, OTUB2	ENSG00000167770, ENSG00000277276, ENSG00000089723	OTU deubiquitinase, ubiquitin aldehyde binding 2, OTU deubiquitinase, ubiquitin aldehyde binding 1	NA
HVAEP1-G013428	asmbl_70542	0.508084	CCZ1, CCZ1B	ENSG00000122674, ENSG00000146574	CCZ1 homolog B, vacuolar protein trafficking and biogenesis associated, CCZ1 homolog, vacuolar protein trafficking and biogenesis associated	NA
HVAEP1-G013229	asmbl_45785	0.508014	PGM5, PGM1	ENSG00000154330, ENSG00000079739	phosphoglucomutase 5, phosphoglucomutase 1	NA
HVAEP1-G011312	asmbl_68700	0.507922	NA	NA	NA	NA
HVAEP1-G019719	asmbl_44754	0.507781	NA	NA	NA	NA
HVAEP1-G012668	asmbl_68797	0.507713	BICD2, BICD1	ENSG00000185963, ENSG00000151746	BICD cargo adaptor 2, BICD cargo adaptor 1	NA
HVAEP1-G025589	asmbl_57660	0.507132	NA	NA	NA	NA
HVAEP1-G013453	asmbl_3006	0.506654	SRP19	ENSG00000153037	signal recognition particle 19	NA
HVAEP1-G007133	asmbl_32178	0.506618	CPSF3	ENSG00000119203	cleavage and polyadenylation specific factor 3	NA
HVAEP1-G022752	asmbl_3902	0.506172	DEAF1, DEAF1	ENSG00000282712, ENSG00000177030	DEAF1 transcription factor	NA
HVAEP1-G020948	asmbl_67904	0.505994	TRMT61A	ENSG00000166166	tRNA methyltransferase 61A	NA
HVAEP1-G020895	asmbl_11606	0.505889	TFIP11	ENSG00000100109	tuftelin interacting protein 11	NA
HVAEP1-G018830	asmbl_77548	0.505881	COPS8	ENSG00000198612	COP9 signalosome subunit 8	NA
HVAEP1-G018409	asmbl_6917	0.505347	TEKT1	ENSG00000167858	tektin 1	NA
HVAEP1-G002614	asmbl_26062	0.504948	HYOU1, HYOU1	ENSG00000280682, ENSG00000149428	hypoxia up-regulated 1	NA
HVAEP1-G028722	asmbl_83377	0.504947	NA	NA	NA	NA
HVAEP1-G011862	asmbl_65725	0.504803	PHB	ENSG00000167085	prohibitin	NA
HVAEP1-G022369	asmbl_18175	0.504771	LIPF, LIPJ, LIPK, LIPN, LIPM, LIPA	ENSG00000182333, ENSG00000204022, ENSG00000204021, ENSG00000204020, ENSG00000173239, ENSG00000107798	lipase A, lysosomal acid type, lipase family member J, lipase F, gastric type, lipase family member M, lipase family member N, lipase family member K	NA
HVAEP1-G023915	asmbl_60805	0.504632	PPIE	ENSG00000084072	peptidylprolyl isomerase E	NA
HVAEP1-G005141	asmbl_11553	0.504102	MRPL19	ENSG00000115364	mitochondrial ribosomal protein L19	NA
HVAEP1-G022081	CLYHEMG014227	0.503545	RPS3	ENSG00000149273	ribosomal protein S3	AY159356.1; ribosomal protein S3
HVAEP1-G015593	asmbl_50281	0.503026	TMED10	ENSG00000170348	transmembrane p24 trafficking protein 10	NA
HVAEP1-G012079	asmbl_29953	0.502915	ICA1, ICA1L	ENSG00000003147, ENSG00000163596	islet cell autoantigen 1, islet cell autoantigen 1 like	NA
HVAEP1-G028797	asmbl_12579	0.502894	DAD1	ENSG00000129562	defender against cell death 1	NA
HVAEP1-G027227	asmbl_16579	0.502781	ELMO2, ELMO1, ELMO3	ENSG00000062598, ENSG00000155849, ENSG00000102890	engulfment and cell motility 2, engulfment and cell motility 1, engulfment and cell motility 3	NA
HVAEP1-G025442	asmbl_75371	0.502332	VPS45	ENSG00000136631	vacuolar protein sorting 45 homolog	NA
HVAEP1-G001433	asmbl_81071	0.501191	RBMX2	ENSG00000134597	RNA binding motif protein X-linked 2	NA
HVAEP1-G005894	asmbl_48068	0.500835	WASF2, WASF1, WASF3	ENSG00000158195, ENSG00000112290, ENSG00000132970	WASP family member 3, WASP family member 1, WASP family member 2	NA
HVAEP1-G004499	asmbl_38096	0.500225	ENPEP	ENSG00000138792	glutamyl aminopeptidase	NA
HVAEP1-G001998	asmbl_83531	0.500124	BACE1, BACE2	ENSG00000186318, ENSG00000182240	beta-secretase 2, beta-secretase 1	NA
HVAEP1-G005294	asmbl_24414	0.499917	TBC1D12, TBC1D14	ENSG00000108239, ENSG00000132405	TBC1 domain family member 14, TBC1 domain family member 12	NA
HVAEP1-G022492	asmbl_33940	0.499736	LARS1	ENSG00000133706	leucyl-tRNA synthetase 1	NA
HVAEP1-G020737	asmbl_66112	0.499509	NA	NA	NA	NA
HVAEP1-G016500	asmbl_41673	0.499444	UTP25	ENSG00000117597	UTP25 small subunit processor component	NA
HVAEP1-G002586	asmbl_65019	0.499141	RPL8	ENSG00000161016	ribosomal protein L8	NA
HVAEP1-G019926	asmbl_37206	0.499026	CG18585, CG7025, CG14820, CG12374, CG2915, CG4408, CG17633, CG4017	FBgn0031929, FBgn0031930, FBgn0035718, FBgn0033774, FBgn0033241, FBgn0039073, FBgn0032144, FBgn0032143	NA	NA
HVAEP1-G001611	asmbl_582	0.498986	RNF168, RNF169	ENSG00000163961, ENSG00000166439	ring finger protein 169, ring finger protein 168	NA
HVAEP1-G023068	asmbl_75968	0.498781	POC5	ENSG00000152359	POC5 centriolar protein	NA
HVAEP1-G020265	asmbl_74010	0.498646	SARNP	ENSG00000205323	SAP domain containing ribonucleoprotein	AY032618.1; putative SAP domain-containing protein
HVAEP1-G001212	asmbl_27678	0.498261	DDX3Y, DDX3X	ENSG00000067048, ENSG00000215301	DEAD-box helicase 3 Y-linked, DEAD-box helicase 3 X-linked	AB047381.1; CnPL10 for PL10-related protein CnPL10
HVAEP1-G008614	asmbl_13297	0.498179	DGKQ	ENSG00000145214	diacylglycerol kinase theta	NA
HVAEP1-G011700	asmbl_90311	0.498157	TRAIP	ENSG00000183763	TRAF interacting protein	NA
HVAEP1-G020709	asmbl_69473	0.49804	TRIM56	ENSG00000169871	tripartite motif containing 56	NA
HVAEP1-G004475	asmbl_19500	0.498032	NA	NA	NA	NA
HVAEP1-G001607	asmbl_27920	0.497936	FTH1, FTHL17, FTMT, FTL	ENSG00000167996, ENSG00000132446, ENSG00000181867, ENSG00000087086	ferritin heavy chain like 17, ferritin mitochondrial, ferritin light chain, ferritin heavy chain 1	NA
HVAEP1-G026640	CLYHEMG018200	0.497573	MRPL46	ENSG00000259494	mitochondrial ribosomal protein L46	NA
HVAEP1-G018380	CLYHEMG007314	0.497511	PPP4C	ENSG00000149923	protein phosphatase 4 catalytic subunit	NA
HVAEP1-G010365	asmbl_46111	0.497466	NA	NA	NA	NA
HVAEP1-G016931	asmbl_11981	0.496919	CCT4	ENSG00000115484	chaperonin containing TCP1 subunit 4	NA
HVAEP1-G011364	asmbl_90341	0.496164	TTC36	ENSG00000172425	tetratricopeptide repeat domain 36	NA
HVAEP1-G009989	asmbl_58338	0.496084	NA	NA	NA	NA
HVAEP1-G011723	asmbl_14922	0.496062	MRPL16	ENSG00000166902	mitochondrial ribosomal protein L16	NA
HVAEP1-G008142	asmbl_20206	0.496037	FBXO5, FBXO43	ENSG00000112029, ENSG00000156509	F-box protein 43, F-box protein 5	NA
HVAEP1-G012928	asmbl_29794	0.495975	PUM3	ENSG00000080608	pumilio RNA binding family member 3	NA
HVAEP1-G008703	asmbl_41979	0.495898	TRMT6	ENSG00000089195	tRNA methyltransferase 6	NA
HVAEP1-G026947	asmbl_7413	0.495194	NA	NA	NA	NA
HVAEP1-G001538	asmbl_73570	0.495191	KAT7	ENSG00000136504	lysine acetyltransferase 7	NA
HVAEP1-G022703	asmbl_68011	0.494939	PAH	ENSG00000171759	phenylalanine hydroxylase	NA
HVAEP1-G006788	asmbl_30190	0.4946	MAK16	ENSG00000198042	MAK16 homolog	NA
HVAEP1-G006085	CLYHEMG016362	0.494436	RPL26L1, RPL26	ENSG00000037241, ENSG00000161970	ribosomal protein L26 like 1, ribosomal protein L26	NA
HVAEP1-G001792	asmbl_70607	0.493912	NA	NA	NA	NA
HVAEP1-G004626	asmbl_40349	0.493831	NA	NA	NA	NA
HVAEP1-G025296	asmbl_75258	0.493769	NA	NA	NA	NA
HVAEP1-G002000	asmbl_18852	0.493584	DPAGT1	ENSG00000172269	dolichyl-phosphate N-acetylglucosaminephosphotransferase 1	NA
HVAEP1-G023880	asmbl_74590	0.493539	ATXN10	ENSG00000130638	ataxin 10	NA
HVAEP1-G023581	asmbl_69683	0.493342	GLUD1, GLUD2, GLUD2	ENSG00000148672, ENSG00000288118, ENSG00000182890	glutamate dehydrogenase 2, glutamate dehydrogenase 1	NA
HVAEP1-G019507	asmbl_7898	0.493172	MLLT6, MLLT6, MLLT10	ENSG00000275851, ENSG00000275023, ENSG00000078403	MLLT6, PHD finger containing, MLLT10 histone lysine methyltransferase DOT1L cofactor	NA
HVAEP1-G026453	asmbl_80361	0.492944	ELAPOR1, ELAPOR2	ENSG00000116299, ENSG00000164659	endosome-lysosome associated apoptosis and autophagy regulator family member 2, endosome-lysosome associated apoptosis and autophagy regulator 1	NA
HVAEP1-G007971	asmbl_38794	0.492776	DDX54	ENSG00000123064	DEAD-box helicase 54	NA
HVAEP1-G001394	asmbl_64959	0.49237	YEATS2	ENSG00000163872	YEATS domain containing 2	NA
HVAEP1-G006100	asmbl_37386	0.492059	PTPN13, FRMPD2, FRMD6, FRMD1	ENSG00000163629, ENSG00000170324, ENSG00000139926, ENSG00000153303	FERM domain containing 6, FERM and PDZ domain containing 2, protein tyrosine phosphatase non-receptor type 13, FERM domain containing 1	NA
HVAEP1-G027523	asmbl_71846	0.490783	TIMM21	ENSG00000075336	translocase of inner mitochondrial membrane 21	NA
HVAEP1-G007545	asmbl_42121	0.490545	NA	NA	NA	NA
HVAEP1-G022341	asmbl_66422	0.490419	UTP18	ENSG00000011260	UTP18 small subunit processome component	NA
HVAEP1-G021182	asmbl_37218	0.490069	NA	NA	NA	NA
HVAEP1-G003901	asmbl_76626	0.489939	NINL, NIN	ENSG00000101004, ENSG00000100503	ninein like, ninein	NA
HVAEP1-G026312	CLYHEMG021466	0.489383	RANBP3, RANBP3L	ENSG00000031823, ENSG00000164188	RAN binding protein 3, RAN binding protein 3 like	NA
HVAEP1-G004448	asmbl_49380	0.489306	EDF1	ENSG00000107223	endothelial differentiation related factor 1	NA
HVAEP1-G010132	asmbl_86782	0.489082	RPL12	ENSG00000197958	ribosomal protein L12	AJ252184.1; homeoprotein (cnot gene)
HVAEP1-G023038	asmbl_86846	0.488881	HDAC2, HDAC1	ENSG00000196591, ENSG00000116478	histone deacetylase 1, histone deacetylase 2	NA
HVAEP1-G022957	asmbl_11283	0.488852	TAMM41, TAMM41	ENSG00000279643, ENSG00000144559	TAM41 mitochondrial translocator assembly and maintenance homolog	NA
HVAEP1-G021540	asmbl_66379	0.48853	NA	NA	NA	NA
HVAEP1-G012670	CLYHEMG007547	0.488194	NA	NA	NA	NA
HVAEP1-G010839	CLYHEMG005836	0.488088	DDX25, DDX19B, DDX19A	ENSG00000109832, ENSG00000157349, ENSG00000168872	DEAD-box helicase 19B, DEAD-box helicase 19A, DEAD-box helicase 25	NA
HVAEP1-G008403	asmbl_76759	0.487969	PELP1	ENSG00000141456	proline, glutamate and leucine rich protein 1	NA
HVAEP1-G003826	asmbl_12985	0.487638	UCHL5	ENSG00000116750	ubiquitin C-terminal hydrolase L5	NA
HVAEP1-G027737	asmbl_65488	0.487598	NUP93	ENSG00000102900	nucleoporin 93	NA
HVAEP1-G004459	asmbl_5118	0.487519	NA	NA	NA	NA
HVAEP1-G012885	asmbl_40112	0.486849	RPL4	ENSG00000174444	ribosomal protein L4	NA
HVAEP1-G016809	asmbl_31877	0.486714	FAM161A, FAM161B	ENSG00000170264, ENSG00000156050	FAM161 centrosomal protein B, FAM161 centrosomal protein A	NA
HVAEP1-G005941	asmbl_53929	0.486663	CstF64	FBgn0027841	NA	NA
HVAEP1-G021966	asmbl_3911	0.486437	NA	NA	NA	NA
HVAEP1-G007186	asmbl_25748	0.485894	MSTO1	ENSG00000125459	misato mitochondrial distribution and morphology regulator 1	NA
HVAEP1-G021919	asmbl_69719	0.485834	CG42588	FBgn0260965	NA	NA
HVAEP1-G002049	asmbl_28017	0.485639	NA	NA	NA	NA
HVAEP1-G019808	asmbl_44518	0.484821	CCDC12	ENSG00000160799	coiled-coil domain containing 12	NA
HVAEP1-G008307	asmbl_3315	0.484512	NA	NA	NA	NA
HVAEP1-G010827	asmbl_84660	0.484312	NA	NA	NA	NA
HVAEP1-G014212	asmbl_11751	0.483937	NUP62CL, NUP62	ENSG00000198088, ENSG00000213024	nucleoporin 62 C-terminal like, nucleoporin 62	NA
HVAEP1-G001423	asmbl_53532	0.483439	AMMECR1L, AMMECR1	ENSG00000144233, ENSG00000101935	AMMECR nuclear protein 1, AMMECR1 like	NA
HVAEP1-G011600	asmbl_47553	0.483135	NA	NA	NA	NA
HVAEP1-G022137	CLYHEMG019681	0.48294	NXT1, NXT2	ENSG00000132661, ENSG00000101888	nuclear transport factor 2 like export factor 1, nuclear transport factor 2 like export factor 2	NA
HVAEP1-G015661	asmbl_50288	0.482562	POMT2	ENSG00000009830	protein O-mannosyltransferase 2	NA
HVAEP1-G012267	asmbl_16072	0.482314	YBX1, YBX3, YBX2, YBX2	ENSG00000065978, ENSG00000060138, ENSG00000288504, ENSG00000006047	Y-box binding protein 2, Y-box binding protein 3, Y-box binding protein 1	NA
HVAEP1-G023703	asmbl_31207	0.482048	E2F8, E2F7	ENSG00000129173, ENSG00000165891	E2F transcription factor 8, E2F transcription factor 7	NA
HVAEP1-G023957	asmbl_39906	0.482048	RPL36AL, RPL36A, RPL36A-HNRNPH2	ENSG00000165502, ENSG00000241343, ENSG00000257529	ribosomal protein L36a like, ribosomal protein L36a, RPL36A-HNRNPH2 readthrough	NA
HVAEP1-G016783	asmbl_37942	0.481859	PI16	ENSG00000164530	peptidase inhibitor 16	NA
HVAEP1-G016550	asmbl_89807	0.481773	slc-25A29	WBGene00008320	SLC (SoLute Carrier) homolog	NA
HVAEP1-G016576	CLYHEMG001386	0.481772	RAMAC, RAMACL	ENSG00000169612, ENSG00000235272	RNA guanine-7 methyltransferase activating subunit,	NA
HVAEP1-G019555	asmbl_18501	0.481498	CS	ENSG00000062485	citrate synthase	NA
HVAEP1-G006654	asmbl_18034	0.481231	GGH	ENSG00000137563	gamma-glutamyl hydrolase	NA
HVAEP1-G015714	asmbl_8731	0.481171	CSN3	FBgn0027055	NA	NA
HVAEP1-G018454	asmbl_2095	0.481134	SNAP29	ENSG00000099940	synaptosome associated protein 29	NA
HVAEP1-G009333	asmbl_74243	0.480941	HTATSF1	ENSG00000102241	HIV-1 Tat specific factor 1	NA
HVAEP1-G009541	asmbl_62498	0.480743	DHX15	ENSG00000109606	DEAH-box helicase 15	NA
HVAEP1-G014569	asmbl_32629	0.480424	DGKE	ENSG00000153933	diacylglycerol kinase epsilon	NA
HVAEP1-G024421	asmbl_44222	0.480331	CAMK4	ENSG00000152495	calcium/calmodulin dependent protein kinase IV	NA
HVAEP1-G012647	asmbl_24234	0.479956	TMCO6	ENSG00000113119	transmembrane and coiled-coil domains 6	NA
HVAEP1-G016930	asmbl_30837	0.479789	ZNF541, MIDEAS, TRERF1	ENSG00000118156, ENSG00000156030, ENSG00000124496	mitotic deacetylase associated SANT domain protein, transcriptional regulating factor 1, zinc finger protein 541	NA
HVAEP1-G004554	asmbl_51709	0.479639	ANKRD27	ENSG00000105186	ankyrin repeat domain 27	NA
HVAEP1-G012876	asmbl_57094	0.479597	POLE4	ENSG00000115350	DNA polymerase epsilon 4, accessory subunit	NA
HVAEP1-G011484	asmbl_89262	0.479397	CDC42	ENSG00000070831	cell division cycle 42	NA
HVAEP1-G016238	asmbl_12928	0.479164	ABCB10	ENSG00000135776	ATP binding cassette subfamily B member 10	NA
HVAEP1-G025623	asmbl_3640	0.479145	ABHD17B, ABHD17A, ABHD17C	ENSG00000107362, ENSG00000129968, ENSG00000136379	abhydrolase domain containing 17B, depalmitoylase, abhydrolase domain containing 17A, depalmitoylase, abhydrolase domain containing 17C, depalmitoylase	NA
HVAEP1-G024934	CLYHEMG017765	0.478991	NA	NA	NA	NA
HVAEP1-G006542	asmbl_55359	0.478776	ARMC2	ENSG00000118690	armadillo repeat containing 2	NA
HVAEP1-G025733	asmbl_51901	0.478362	SAXO1, SAXO2	ENSG00000155875, ENSG00000188659	stabilizer of axonemal microtubules 1, stabilizer of axonemal microtubules 2	NA
HVAEP1-G009418	CLYHEMG007247	0.477907	NA	NA	NA	NA
HVAEP1-G019972	asmbl_45388	0.477797	GARS1	ENSG00000106105	glycyl-tRNA synthetase 1	NA
HVAEP1-G006411	asmbl_86165	0.477788	MAP3K5, MAP3K6, MAP3K15	ENSG00000197442, ENSG00000142733, ENSG00000180815	mitogen-activated protein kinase kinase kinase 15, mitogen-activated protein kinase kinase kinase 6, mitogen-activated protein kinase kinase kinase 5	NA
HVAEP1-G005829	asmbl_30215	0.477749	SMC6	ENSG00000163029	structural maintenance of chromosomes 6	NA
HVAEP1-G006329	asmbl_43534	0.477281	SCOC	ENSG00000153130	short coiled-coil protein	NA
HVAEP1-G020359	asmbl_68338	0.477269	NACAD, NACA2, NACA	ENSG00000136274, ENSG00000253506, ENSG00000196531	NAC alpha domain containing, nascent polypeptide associated complex subunit alpha, nascent polypeptide associated complex subunit alpha 2	NA
HVAEP1-G021466	asmbl_86396	0.47711	EIF2S1	ENSG00000134001	eukaryotic translation initiation factor 2 subunit alpha	NA
HVAEP1-G017931	asmbl_66948	0.476887	RPL6	ENSG00000089009	ribosomal protein L6	NA
HVAEP1-G014491	asmbl_66221	0.476396	RPL27	ENSG00000131469	ribosomal protein L27	NA
HVAEP1-G026748	asmbl_4731	0.475573	LRGUK	ENSG00000155530	leucine rich repeats and guanylate kinase domain containing	NA
HVAEP1-G027003	asmbl_75552	0.47533	NA	NA	NA	NA
HVAEP1-G028094	asmbl_32306	0.475314	MCM4	ENSG00000104738	minichromosome maintenance complex component 4	NA
HVAEP1-G003607	asmbl_84596	0.474893	CENPA	ENSG00000115163	centromere protein A	NA
HVAEP1-G006205	asmbl_74537	0.474708	NA	NA	NA	NA
HVAEP1-G001605	asmbl_12968	0.474693	CABYR	ENSG00000154040	calcium binding tyrosine phosphorylation regulated	NA
HVAEP1-G022344	asmbl_49133	0.474425	PSMD13	ENSG00000185627	proteasome 26S subunit, non-ATPase 13	NA
HVAEP1-G001495	asmbl_26497	0.474234	NUSAP1	ENSG00000137804	nucleolar and spindle associated protein 1	NA
HVAEP1-G019999	asmbl_46192	0.473978	MRPS25	ENSG00000131368	mitochondrial ribosomal protein S25	NA
HVAEP1-G020164	asmbl_78600	0.473605	METTL4	ENSG00000101574	methyltransferase like 4	NA
HVAEP1-G028807	CLYHEMG005736	0.473537	HAUS4	ENSG00000092036	HAUS augmin like complex subunit 4	NA
HVAEP1-G011523	asmbl_10807	0.473298	CRNKL1	ENSG00000101343	crooked neck pre-mRNA splicing factor 1	NA
HVAEP1-G017402	asmbl_49925	0.473158	DNAL1	ENSG00000119661	dynein axonemal light chain 1	NA
HVAEP1-G018958	asmbl_37709	0.47315	NA	NA	NA	NA
HVAEP1-G014704	asmbl_35077	0.473046	ANAPC10	ENSG00000164162	anaphase promoting complex subunit 10	NA
HVAEP1-G006544	asmbl_55166	0.472873	PCED1A, PCED1B	ENSG00000132635, ENSG00000179715	PC-esterase domain containing 1A, PC-esterase domain containing 1B	NA
HVAEP1-G016211	asmbl_44280	0.472391	SPTLC2, SPTLC3	ENSG00000100596, ENSG00000172296	serine palmitoyltransferase long chain base subunit 3, serine palmitoyltransferase long chain base subunit 2	NA
HVAEP1-G021839	asmbl_90036	0.472316	SEC11A	ENSG00000140612	SEC11 homolog A, signal peptidase complex subunit	NA
HVAEP1-G027272	asmbl_51697	0.47215	RPL13	ENSG00000167526	ribosomal protein L13	NA
HVAEP1-G021668	asmbl_37651	0.472034	SMU1	ENSG00000122692	SMU1 DNA replication regulator and spliceosomal factor	NA
HVAEP1-G004100	asmbl_21277	0.471979	ATP6V1B2, ATP6V1B1	ENSG00000147416, ENSG00000116039	ATPase H+ transporting V1 subunit B2, ATPase H+ transporting V1 subunit B1	NA
HVAEP1-G015659	asmbl_50290	0.471532	NA	NA	NA	NA
HVAEP1-G021800	asmbl_822	0.471388	NUP85	ENSG00000125450	nucleoporin 85	NA
HVAEP1-G019518	asmbl_69264	0.471381	LZTFL1	ENSG00000163818	leucine zipper transcription factor like 1	NA
HVAEP1-G026754	asmbl_14462	0.471328	BRPF1, BRD1, BRPF3	ENSG00000156983, ENSG00000100425, ENSG00000096070	bromodomain containing 1, bromodomain and PHD finger containing 3, bromodomain and PHD finger containing 1	NA
HVAEP1-G009247	asmbl_24613	0.471284	NA	NA	NA	NA
HVAEP1-G005090	asmbl_22174	0.470959	CCNH	ENSG00000134480	cyclin H	NA
HVAEP1-G019839	asmbl_90646	0.470476	PSMD3	ENSG00000108344	proteasome 26S subunit, non-ATPase 3	NA
HVAEP1-G012921	CLYHEMG021298	0.470316	EXOSC6	ENSG00000223496	exosome component 6	NA
HVAEP1-G022403	asmbl_72956	0.470246	SAR1A, SAR1B	ENSG00000079332, ENSG00000152700	secretion associated Ras related GTPase 1A, secretion associated Ras related GTPase 1B	NA
HVAEP1-G023060	asmbl_81121	0.470084	CG31224	FBgn0051224	NA	NA
HVAEP1-G010493	asmbl_33258	0.470074	PHF10	ENSG00000130024	PHD finger protein 10	NA
HVAEP1-G019040	asmbl_37752	0.46956	EIF4ENIF1	ENSG00000184708	eukaryotic translation initiation factor 4E nuclear import factor 1	NA
HVAEP1-G011343	asmbl_33812	0.469558	ACOXL	ENSG00000153093	acyl-CoA oxidase like	NA
HVAEP1-G011522	asmbl_38630	0.469331	KMO	ENSG00000117009	kynurenine 3-monooxygenase	NA
HVAEP1-G023336	asmbl_31167	0.469143	FAXDC2	ENSG00000170271	fatty acid hydroxylase domain containing 2	NA
HVAEP1-G009526	asmbl_88340	0.469021	PPP4R2	ENSG00000163605	protein phosphatase 4 regulatory subunit 2	NA
HVAEP1-G001617	asmbl_41166	0.468952	GPATCH1	ENSG00000076650	G-patch domain containing 1	NA
HVAEP1-G027185	asmbl_44051	0.468947	NPRL2	ENSG00000114388	NPR2 like, GATOR1 complex subunit	NA
HVAEP1-G022927	asmbl_62718	0.468918	NA	NA	NA	NA
HVAEP1-G005091	asmbl_50092	0.468895	VBP1	ENSG00000155959	VHL binding protein 1	NA
HVAEP1-G018848	asmbl_63708	0.46884	Indy, Indy-2, CG33934, CG7309	FBgn0036816, FBgn0260466, FBgn0064119, FBgn0032314	NA	NA
HVAEP1-G023900	asmbl_36274	0.468582	PRIM2	ENSG00000146143	DNA primase subunit 2	NA
HVAEP1-G004284	asmbl_21161	0.468209	EIF3G	ENSG00000130811	eukaryotic translation initiation factor 3 subunit G	NA
HVAEP1-G004918	CLYHEMG003430	0.468069	RPL7A, RPL7A	ENSG00000280858, ENSG00000148303	ribosomal protein L7a	NA
HVAEP1-G018930	asmbl_12719	0.467978	RPL23A	ENSG00000198242	ribosomal protein L23a	NA
HVAEP1-G011341	asmbl_35539	0.467376	SPCS1	ENSG00000114902	signal peptidase complex subunit 1	NA
HVAEP1-G027103	asmbl_18711	0.467324	LMOD3, LMOD1, LMOD2, TMOD2, TMOD3, TMOD4, TMOD1	ENSG00000163380, ENSG00000163431, ENSG00000170807, ENSG00000128872, ENSG00000138594, ENSG00000163157, ENSG00000136842	tropomodulin 1, tropomodulin 3, uncharacterized LOC112268148, tropomodulin 2, leiomodin 3, leiomodin 2, tropomodulin 4, leiomodin 1	NA
HVAEP1-G006695	asmbl_56630	0.466742	TMED9, TMED4	ENSG00000184840, ENSG00000158604	transmembrane p24 trafficking protein 4, transmembrane p24 trafficking protein 9	NA
HVAEP1-G016220	asmbl_85355	0.466177	PAPOLB, PAPOLA, PAPOLG	ENSG00000218823, ENSG00000090060, ENSG00000115421	poly(A) polymerase beta, poly(A) polymerase alpha, poly(A) polymerase gamma	NA
HVAEP1-G006754	asmbl_53917	0.465885	EIF2S3, EIF2S3B	ENSG00000130741, ENSG00000180574	eukaryotic translation initiation factor 2 subunit gamma, eukaryotic translation initiation factor 2 subunit gamma B	NA
HVAEP1-G016805	asmbl_17532	0.465597	NA	NA	NA	NA
HVAEP1-G015999	asmbl_85232	0.465579	OAZ3, OAZ2, OAZ1	ENSG00000143450, ENSG00000180304, ENSG00000104904	ornithine decarboxylase antizyme 1, ornithine decarboxylase antizyme 2, ornithine decarboxylase antizyme 3	NA
HVAEP1-G017190	asmbl_78321	0.465558	LCMT1	ENSG00000205629	leucine carboxyl methyltransferase 1	NA
HVAEP1-G004139	asmbl_60232	0.465517	POLR1F	ENSG00000105849	RNA polymerase I subunit F	NA
HVAEP1-G010103	asmbl_25963	0.465156	WDR4	ENSG00000160193	WD repeat domain 4	NA
HVAEP1-G004132	asmbl_40301	0.465141	NELFB	ENSG00000188986	negative elongation factor complex member B	NA
HVAEP1-G020557	CLYHEMG004981	0.46499	c1galt1	ENSXETG00000036514	protein brambleberry-like	NA
HVAEP1-G005985	asmbl_26289	0.464872	RPL32	ENSG00000144713	ribosomal protein L32	NA
HVAEP1-G016421	asmbl_75342	0.464719	NA	NA	NA	NA
HVAEP1-G009008	asmbl_60455	0.464645	NA	NA	NA	NA
HVAEP1-G022631	asmbl_68087	0.463566	egl-38, pax-2	WBGene00001204, WBGene00003938	hypothetical protein, PAX (Paired box) transcription factor	U96194.1; Pax-B
HVAEP1-G001081	asmbl_28130	0.463381	LSM1	ENSG00000175324	LSM1 homolog, mRNA degradation associated	NA
HVAEP1-G013598	asmbl_28399	0.46329	LSM4	ENSG00000130520	LSM4 homolog, U6 small nuclear RNA and mRNA degradation associated	NA
HVAEP1-G025783	asmbl_72648	0.463084	TICRR	ENSG00000140534	TOPBP1 interacting checkpoint and replication regulator	NA
HVAEP1-G015991	asmbl_77267	0.462885	MAP1LC3C	ENSG00000197769	microtubule associated protein 1 light chain 3 gamma	NA
HVAEP1-G007599	asmbl_82213	0.462838	SMNDC1	ENSG00000119953	survival motor neuron domain containing 1	NA
HVAEP1-G011306	asmbl_75068	0.462598	TMBIM6	ENSG00000139644	transmembrane BAX inhibitor motif containing 6	NA
HVAEP1-G006836	asmbl_6961	0.462563	BOD1, BOD1L2, BOD1L1	ENSG00000145919, ENSG00000228075, ENSG00000038219	biorientation of chromosomes in cell division 1 like 1, biorientation of chromosomes in cell division 1 like 2, biorientation of chromosomes in cell division 1	NA
HVAEP1-G024905	asmbl_82535	0.461121	GPANK1, GPANK1, GPANK1, GPANK1, GPANK1, GPANK1, GPANK1	ENSG00000232312, ENSG00000223932, ENSG00000204438, ENSG00000228605, ENSG00000236011, ENSG00000206408, ENSG00000233210	G-patch domain and ankyrin repeats 1	NA
HVAEP1-G001598	asmbl_62901	0.461114	NA	NA	NA	NA
HVAEP1-G022943	asmbl_69651	0.461041	NA	NA	NA	NA
HVAEP1-G011253	asmbl_84679	0.460691	ESF1	ENSG00000089048	ESF1 nucleolar pre-rRNA processing protein homolog	NA
HVAEP1-G023921	asmbl_35387	0.460455	NA	NA	NA	NA
HVAEP1-G015755	asmbl_26742	0.460135	CAPN9, CAPN3, CAPN1, CAPN8, CAPN2, CAPN11, CAPN12, CAPN13, CAPN14	ENSG00000135773, ENSG00000092529, ENSG00000014216, ENSG00000203697, ENSG00000162909, ENSG00000137225, ENSG00000182472, ENSG00000162949, ENSG00000214711	calpain 3, calpain 11, calpain 1, calpain 13, calpain 14, calpain 12, calpain 9, calpain 8, calpain 2	NA
HVAEP1-G009851	asmbl_49672	0.460101	RPS11	ENSG00000142534	ribosomal protein S11	NA
HVAEP1-G009151	asmbl_70090	0.459841	KIF21A, KIF21B	ENSG00000139116, ENSG00000116852	kinesin family member 21A, kinesin family member 21B	NA
HVAEP1-G023220	asmbl_73763	0.459523	SLC17A9	ENSG00000101194	solute carrier family 17 member 9	NA
HVAEP1-G025563	asmbl_67707	0.459077	FARS2	ENSG00000145982	phenylalanyl-tRNA synthetase 2, mitochondrial	NA
HVAEP1-G022075	asmbl_58706	0.459069	FECH	ENSG00000066926	ferrochelatase	NA
HVAEP1-G007270	asmbl_62567	0.458887	EXO1	ENSG00000174371	exonuclease 1	NA
HVAEP1-G007275	CLYHEMG007051	0.458693	TBCEL, TBCEL-TECTA	ENSG00000154114, ENSG00000285509	tubulin folding cofactor E like,	NA
HVAEP1-G002110	asmbl_81083	0.458564	POLR2H	ENSG00000163882	RNA polymerase II, I and III subunit H	NA
HVAEP1-G019412	asmbl_90602	0.45846	Y32F6A.4, Y4C6B.2, Y18D10A.23, R02F2.8, Y59H11AR.4, F21D12.3	WBGene00012529, WBGene00021156, WBGene00012487, WBGene00019837, WBGene00022012, WBGene00017663	hypothetical protein	NA
HVAEP1-G021326	asmbl_63546	0.458059	SOX4, SOX12, SOX11	ENSG00000124766, ENSG00000177732, ENSG00000176887	SRY-box transcription factor 12, SRY-box transcription factor 4, SRY-box transcription factor 11	JQ994230.1; transcription factor HvSoxC
HVAEP1-G024651	asmbl_67929	0.457824	CCDC124	ENSG00000007080	coiled-coil domain containing 124	NA
HVAEP1-G011148	asmbl_27086	0.457557	ELP5, ELP5	ENSG00000288485, ENSG00000170291	elongator acetyltransferase complex subunit 5	NA
HVAEP1-G023621	asmbl_58716	0.457437	SEPTIN6, SEPTIN8, SEPTIN14, SEPTIN10, SEPTIN11	ENSG00000125354, ENSG00000164402, ENSG00000154997, ENSG00000186522, ENSG00000138758	septin 14, septin 6, septin 11, septin 8, septin 10	NA
HVAEP1-G019413	asmbl_78534	0.457059	ARPC2	ENSG00000163466	actin related protein 2/3 complex subunit 2	NA
HVAEP1-G012973	asmbl_47924	0.456895	PI4KA	ENSG00000241973	phosphatidylinositol 4-kinase alpha	NA
HVAEP1-G025943	asmbl_30699	0.456783	NIPBL	ENSG00000164190	NIPBL cohesin loading factor	NA
HVAEP1-G016437	asmbl_40621	0.456569	MCM5	ENSG00000100297	minichromosome maintenance complex component 5	NA
HVAEP1-G014693	CLYHEMG010901	0.456438	RPL10, RPL10L	ENSG00000147403, ENSG00000165496	ribosomal protein L10 like, ribosomal protein L10	U60651.1; ribosomal protein L10
HVAEP1-G004298	asmbl_47644	0.456396	EIF3M	ENSG00000149100	eukaryotic translation initiation factor 3 subunit M	NA
HVAEP1-G011925	asmbl_28723	0.456136	NA	NA	NA	NA
HVAEP1-G014853	asmbl_22753	0.455659	NA	NA	NA	NA
HVAEP1-G022314	asmbl_19274	0.455655	FKBP6	ENSG00000077800	FKBP prolyl isomerase family member 6 (inactive)	NA
HVAEP1-G028114	asmbl_21718	0.455384	RBM23, RBM39	ENSG00000100461, ENSG00000131051	RNA binding motif protein 39, RNA binding motif protein 23	NA
HVAEP1-G001479	asmbl_53366	0.45518	ECT2	ENSG00000114346	epithelial cell transforming 2	NA
HVAEP1-G018943	asmbl_77535	0.4551	ATP5F1D	ENSG00000099624	ATP synthase F1 subunit delta	NA
HVAEP1-G001534	asmbl_69914	0.454872	ubc-19	WBGene00006714	UBiquitin Conjugating enzyme	NA
HVAEP1-G012598	asmbl_64220	0.454756	MCM2	ENSG00000073111	minichromosome maintenance complex component 2	NA
HVAEP1-G024558	asmbl_57854	0.454648	NA	NA	NA	NA
HVAEP1-G022438	asmbl_84739	0.454494	TMEM185B, TMEM185A	ENSG00000226479, ENSG00000269556	transmembrane protein 185A, transmembrane protein 185B	NA
HVAEP1-G019966	asmbl_78594	0.454101	NA	NA	NA	NA
HVAEP1-G011464	asmbl_28739	0.454071	SAE1	ENSG00000142230	SUMO1 activating enzyme subunit 1	NA
HVAEP1-G002612	asmbl_1036	0.454033	RAB41	ENSG00000147127	RAB41, member RAS oncogene family	NA
HVAEP1-G017561	asmbl_9211	0.453924	NA	NA	NA	NA
HVAEP1-G018472	asmbl_76574	0.453468	NA	NA	NA	NA
HVAEP1-G006076	asmbl_35018	0.453339	ZCCHC4	ENSG00000168228	zinc finger CCHC-type containing 4	NA
HVAEP1-G026430	asmbl_11479	0.453017	DYRK2, DYRK3	ENSG00000127334, ENSG00000143479	dual specificity tyrosine phosphorylation regulated kinase 2, dual specificity tyrosine phosphorylation regulated kinase 3	NA
HVAEP1-G000558	asmbl_65087	0.452768	RPS19	ENSG00000105372	ribosomal protein S19	DQ286051.1; ribosomal protein S19
HVAEP1-G005940	asmbl_22159	0.452748	TENT5C, TENT5D, TENT5B, TENT5A	ENSG00000183508, ENSG00000174016, ENSG00000158246, ENSG00000112773	terminal nucleotidyltransferase 5A, terminal nucleotidyltransferase 5D, terminal nucleotidyltransferase 5B, terminal nucleotidyltransferase 5C	NA
HVAEP1-G001367	asmbl_2447	0.4526	ETFB	ENSG00000105379	electron transfer flavoprotein subunit beta	AY030357.1; electron transfer flavoprotein beta subunit
HVAEP1-G012963	asmbl_11741	0.452547	GTF3C3	ENSG00000119041	general transcription factor IIIC subunit 3	NA
HVAEP1-G013933	asmbl_51374	0.452434	ZNF207	ENSG00000010244	zinc finger protein 207	NA
HVAEP1-G024258	asmbl_77945	0.452428	DAZAP1	ENSG00000071626	DAZ associated protein 1	NA
HVAEP1-G022696	asmbl_6651	0.452377	ADK	ENSG00000156110	adenosine kinase	NA
HVAEP1-G027438	asmbl_55465	0.451934	BBS4	ENSG00000140463	Bardet-Biedl syndrome 4	AY212267.1; Bardet-Biedl Syndrome 4 protein
HVAEP1-G009857	asmbl_58480	0.451878	GRSF1, HNRNPH3, HNRNPF, HNRNPH1, HNRNPH1, HNRNPH2	ENSG00000132463, ENSG00000096746, ENSG00000169813, ENSG00000169045, ENSG00000284254, ENSG00000126945	heterogeneous nuclear ribonucleoprotein H1, G-rich RNA sequence binding factor 1, heterogeneous nuclear ribonucleoprotein H3, heterogeneous nuclear ribonucleoprotein F, heterogeneous nuclear ribonucleoprotein H2	NA
HVAEP1-G009398	asmbl_56460	0.451816	DUSP11	ENSG00000144048	dual specificity phosphatase 11	NA
HVAEP1-G008368	asmbl_2986	0.451712	RPL19	ENSG00000108298	ribosomal protein L19	NA
HVAEP1-G010799	asmbl_90302	0.451389	ERP44	ENSG00000023318	endoplasmic reticulum protein 44	NA
HVAEP1-G003656	asmbl_49371	0.451231	NA	NA	NA	NA
HVAEP1-G024732	asmbl_48501	0.450875	PSMA1	ENSG00000129084	proteasome 20S subunit alpha 1	NA
HVAEP1-G021298	asmbl_90385	0.450578	SPDL1	ENSG00000040275	spindle apparatus coiled-coil protein 1	NA
HVAEP1-G013530	CLYHEMG023309	0.450185	NA	NA	NA	NA
HVAEP1-G022986	asmbl_21101	0.4501	NA	NA	NA	NA
HVAEP1-G007993	asmbl_76807	0.45006	NA	NA	NA	NA
HVAEP1-G014961	asmbl_85100	0.450042	NA	NA	NA	NA
HVAEP1-G020776	asmbl_45481	0.449835	NA	NA	NA	NA
HVAEP1-G009441	asmbl_70712	0.449778	VPS11, VPS11	ENSG00000280616, ENSG00000160695	VPS11 core subunit of CORVET and HOPS complexes	NA
HVAEP1-G008311	asmbl_81565	0.449475	MZB1	ENSG00000170476	marginal zone B and B1 cell specific protein	NA
HVAEP1-G015382	asmbl_82674	0.449372	ECD	ENSG00000122882	ecdysoneless cell cycle regulator	HQ660067.1; SGT1
HVAEP1-G021611	asmbl_38448	0.449278	NA	NA	NA	NA
HVAEP1-G006373	asmbl_81831	0.449155	PBDC1	ENSG00000102390	polysaccharide biosynthesis domain containing 1	NA
HVAEP1-G005767	asmbl_24439	0.448921	NA	NA	NA	NA
HVAEP1-G017405	asmbl_52380	0.448766	ITPKB, ITPKA, ITPKC	ENSG00000143772, ENSG00000137825, ENSG00000086544	inositol-trisphosphate 3-kinase A, inositol-trisphosphate 3-kinase C, inositol-trisphosphate 3-kinase B	NA
HVAEP1-G022594	asmbl_16241	0.448197	NA	NA	NA	NA
HVAEP1-G021071	asmbl_12018	0.44783	EPHX4, EPHX3	ENSG00000172031, ENSG00000105131	epoxide hydrolase 3, epoxide hydrolase 4	NA
HVAEP1-G019396	asmbl_72215	0.447739	BBS12	ENSG00000181004	Bardet-Biedl syndrome 12	NA
HVAEP1-G021516	asmbl_76059	0.447107	PPP1R12C, PPP1R12B, PPP1R12A	ENSG00000125503, ENSG00000077157, ENSG00000058272	protein phosphatase 1 regulatory subunit 12A, protein phosphatase 1 regulatory subunit 12C, protein phosphatase 1 regulatory subunit 12B	NA
HVAEP1-G019968	CLYHEMG003246	0.447036	PTF1A	ENSG00000168267	pancreas associated transcription factor 1a	NA
HVAEP1-G003516	asmbl_12988	0.446925	RPS5	ENSG00000083845	ribosomal protein S5	NA
HVAEP1-G022978	asmbl_11377	0.446924	NA	NA	NA	NA
HVAEP1-G022219	asmbl_48983	0.44668	NA	NA	NA	NA
HVAEP1-G015945	asmbl_50280	0.446425	TTBK2, TTBK1	ENSG00000128881, ENSG00000146216	tau tubulin kinase 2, tau tubulin kinase 1	NA
HVAEP1-G013775	asmbl_89291	0.4464	PFDN1	ENSG00000113068	prefoldin subunit 1	NA
HVAEP1-G025183	asmbl_52872	0.446321	NA	NA	NA	NA
HVAEP1-G004084	asmbl_3244	0.446117	RAB41	ENSG00000147127	RAB41, member RAS oncogene family	NA
HVAEP1-G011245	asmbl_85984	0.445991	EIF3K, EIF3K	ENSG00000282986, ENSG00000178982	eukaryotic translation initiation factor 3 subunit K	NA
HVAEP1-G005447	asmbl_74572	0.445618	GATD3B, GATD3A	ENSG00000280071, ENSG00000160221	glutamine amidotransferase like class 1 domain containing 3B, glutamine amidotransferase like class 1 domain containing 3A	NA
HVAEP1-G006074	asmbl_47012	0.445607	SMTN, SMTNL2, SMTNL1	ENSG00000183963, ENSG00000188176, ENSG00000214872	smoothelin, smoothelin like 1, smoothelin like 2	NA
HVAEP1-G006932	asmbl_22172	0.445214	Ocrl	FBgn0023508	NA	NA
HVAEP1-G004021	asmbl_17742	0.445095	DDR1, DDR1, DDR1, DDR1, DDR1, DDR2	ENSG00000234078, ENSG00000230456, ENSG00000137332, ENSG00000215522, ENSG00000204580, ENSG00000162733	discoidin domain receptor tyrosine kinase 1, discoidin domain receptor tyrosine kinase 2	HM117253.1; strain Ind-Pune discoidin domain receptor tyrosine kinase (DDR)
HVAEP1-G003942	asmbl_28815	0.444991	BUD13	ENSG00000137656	BUD13 homolog	NA
HVAEP1-G016208	CLYHEMG025884	0.444931	SCHIP1, IQCJ-SCHIP1	ENSG00000151967, ENSG00000283154	schwannomin interacting protein 1, IQCJ-SCHIP1 readthrough	NA
HVAEP1-G003717	asmbl_30762	0.444559	NA	NA	NA	NA
HVAEP1-G018374	CLYHEMG001950	0.444421	RFC2	ENSG00000049541	replication factor C subunit 2	NA
HVAEP1-G018666	asmbl_5557	0.444401	NLE1	ENSG00000073536	notchless homolog 1	NA
HVAEP1-G022632	asmbl_63524	0.444301	NA	NA	NA	NA
HVAEP1-G014120	asmbl_67026	0.444154	CG5439	FBgn0032476	NA	NA
HVAEP1-G018462	asmbl_3779	0.444068	SFSWAP	ENSG00000061936	splicing factor SWAP	NA
HVAEP1-G022077	asmbl_67977	0.443879	TFEC, TFEB, MITF, TFE3	ENSG00000105967, ENSG00000112561, ENSG00000187098, ENSG00000068323	transcription factor binding to IGHM enhancer 3, transcription factor EB, transcription factor EC, melanocyte inducing transcription factor	NA
HVAEP1-G027349	asmbl_6875	0.443795	NA	NA	NA	NA
HVAEP1-G002439	asmbl_1090	0.443717	NDUFAF1	ENSG00000137806	NADH:ubiquinone oxidoreductase complex assembly factor 1	NA
HVAEP1-G007781	asmbl_13266	0.443566	SDR16C5	ENSG00000170786	short chain dehydrogenase/reductase family 16C member 5	NA
HVAEP1-G018081	asmbl_37895	0.443476	NA	NA	NA	NA
HVAEP1-G022172	asmbl_36042	0.443447	NA	NA	NA	NA
HVAEP1-G028862	asmbl_83378	0.443375	NA	NA	NA	LN868234.1; Contactin-associated protein 4-like (CNTNAP4L gene), strain Jussy
HVAEP1-G004446	asmbl_6248	0.443368	TYW3	ENSG00000162623	tRNA-yW synthesizing protein 3 homolog	NA
HVAEP1-G012975	asmbl_70554	0.443206	fzy-1	WBGene00001511	WD repeat-containing protein fzy-1	NA
HVAEP1-G019274	asmbl_33035	0.443106	HROB	ENSG00000125319	homologous recombination factor with OB-fold	NA
HVAEP1-G025662	asmbl_81457	0.442688	COG1	ENSG00000166685	component of oligomeric golgi complex 1	NA
HVAEP1-G026329	asmbl_53895	0.442425	CAPZA1, CAPZA3, CAPZA2	ENSG00000116489, ENSG00000177938, ENSG00000198898	capping actin protein of muscle Z-line subunit alpha 3, capping actin protein of muscle Z-line subunit alpha 2, capping actin protein of muscle Z-line subunit alpha 1	NA
HVAEP1-G023226	asmbl_49143	0.442304	EXOSC8	ENSG00000120699	exosome component 8	NA
HVAEP1-G003781	asmbl_40264	0.442296	PPIL3	ENSG00000240344	peptidylprolyl isomerase like 3	NA
HVAEP1-G018445	nbis-gene-101	0.442271	C22orf39	ENSG00000242259	chromosome 22 open reading frame 39	NA
HVAEP1-G002270	asmbl_73511	0.442139	KDM6B, KDM6A, UTY	ENSG00000132510, ENSG00000147050, ENSG00000183878	ubiquitously transcribed tetratricopeptide repeat containing, Y-linked, lysine demethylase 6A, lysine demethylase 6B	NA
HVAEP1-G007705	asmbl_20580	0.441814	DDIT4L, DDIT4	ENSG00000145358, ENSG00000168209	DNA damage inducible transcript 4 like, DNA damage inducible transcript 4	NA
HVAEP1-G010259	asmbl_66455	0.441682	NA	NA	NA	NA
HVAEP1-G014698	asmbl_22686	0.441584	RPL18	ENSG00000063177	ribosomal protein L18	NA
HVAEP1-G003929	asmbl_68216	0.441568	VPS8	ENSG00000156931	VPS8 subunit of CORVET complex	NA
HVAEP1-G011149	asmbl_27083	0.441503	PSMB6, PSMB9, PSMB9, PSMB9, PSMB9, PSMB9, PSMB9, PSMB9, PSMB9	ENSG00000142507, ENSG00000242711, ENSG00000243958, ENSG00000240508, ENSG00000239836, ENSG00000240118, ENSG00000243594, ENSG00000243067, ENSG00000240065	proteasome 20S subunit beta 9, proteasome 20S subunit beta 6	NA
HVAEP1-G005027	asmbl_42481	0.44139	NA	NA	NA	NA
HVAEP1-G015772	asmbl_63640	0.441363	IQCG	ENSG00000114473	IQ motif containing G	NA
HVAEP1-G012988	CLYHEMG021909	0.441233	MUTYH	ENSG00000132781	mutY DNA glycosylase	NA
HVAEP1-G004357	asmbl_83035	0.441198	DNMT1	ENSG00000130816	DNA methyltransferase 1	NA
HVAEP1-G010819	asmbl_90308	0.441184	NA	NA	NA	NA
HVAEP1-G003520	asmbl_40414	0.440835	BCS1L	ENSG00000074582	BCS1 homolog, ubiquinol-cytochrome c reductase complex chaperone	NA
HVAEP1-G017344	asmbl_7744	0.440823	NA	NA	NA	NA
HVAEP1-G010681	asmbl_17891	0.440815	SRM	ENSG00000116649	spermidine synthase	NA
HVAEP1-G021594	CLYHEMG015240	0.440644	MRPL22	ENSG00000082515	mitochondrial ribosomal protein L22	NA
HVAEP1-G015474	asmbl_34067	0.440633	NA	NA	NA	NA
HVAEP1-G018400	asmbl_36501	0.440622	znf205, znf33b	ENSXETG00000040298, ENSXETG00000017171	zinc finger protein 205, zinc finger protein 33B, uncharacterized LOC100135213	NA
HVAEP1-G016763	asmbl_38785	0.440611	REC114	ENSG00000183324	REC114 meiotic recombination protein	NA
HVAEP1-G028467	asmbl_3197	0.440186	ATP6V0D2, ATP6V0D1	ENSG00000147614, ENSG00000159720	ATPase H+ transporting V0 subunit d2, ATPase H+ transporting V0 subunit d1	NA
HVAEP1-G008603	asmbl_82198	0.440125	PDCD2L	ENSG00000126249	programmed cell death 2 like	NA
HVAEP1-G022400	asmbl_43429	0.440083	IPO13	ENSG00000117408	importin 13	NA
HVAEP1-G005738	asmbl_24444	0.439904	SLC17A2	ENSG00000112337	solute carrier family 17 member 2	NA
HVAEP1-G028015	asmbl_14081	0.439746	GLE1	ENSG00000119392	GLE1 RNA export mediator	NA
HVAEP1-G027425	asmbl_51580	0.439451	BCL2L2-PABPN1, PABPN1	ENSG00000258643, ENSG00000100836	poly(A) binding protein nuclear 1, BCL2L2-PABPN1 readthrough	NA
HVAEP1-G005439	asmbl_46851	0.439325	SFXN5	ENSG00000144040	sideroflexin 5	NA
HVAEP1-G016486	asmbl_17575	0.439127	LNPEP, ERAP2, ERAP1	ENSG00000113441, ENSG00000164308, ENSG00000164307	leucyl and cystinyl aminopeptidase, endoplasmic reticulum aminopeptidase 2, endoplasmic reticulum aminopeptidase 1	NA
HVAEP1-G025591	asmbl_57689	0.438946	RPL17, RPL17-C18orf32	ENSG00000265681, ENSG00000215472	RPL17-C18orf32 readthrough, ribosomal protein L17	NA
HVAEP1-G016382	asmbl_14804	0.438804	CDK11B, CDK11A	ENSG00000248333, ENSG00000008128	cyclin dependent kinase 11A, cyclin dependent kinase 11B	NA
HVAEP1-G014703	CLYHEMG003580	0.438772	GPN1	ENSG00000198522	GPN-loop GTPase 1	NA
HVAEP1-G020702	asmbl_87836	0.438736	HINT3	ENSG00000111911	histidine triad nucleotide binding protein 3	NA
HVAEP1-G023184	asmbl_11174	0.438569	SEC24D, SEC24C	ENSG00000150961, ENSG00000176986	SEC24 homolog D, COPII coat complex component, SEC24 homolog C, COPII coat complex component	NA
HVAEP1-G016864	asmbl_52213	0.438208	NA	NA	NA	NA
HVAEP1-G017464	asmbl_89931	0.437508	EXOSC5	ENSG00000077348	exosome component 5	NA
HVAEP1-G016799	asmbl_80580	0.437198	MRPL4	ENSG00000105364	mitochondrial ribosomal protein L4	NA
HVAEP1-G006744	asmbl_34240	0.436894	NA	NA	NA	NA
HVAEP1-G017982	asmbl_53005	0.436555	Y32H12A.9	WBGene00021317	hypothetical protein	NA
HVAEP1-G016954	asmbl_74685	0.43634	TIMM50	ENSG00000105197	translocase of inner mitochondrial membrane 50	NA
HVAEP1-G021205	asmbl_62697	0.436338	NA	NA	NA	NA
HVAEP1-G002518	asmbl_18805	0.43576	NME7	ENSG00000143156	NME/NM23 family member 7	NA
HVAEP1-G008975	asmbl_82337	0.435715	NA	NA	NA	NA
HVAEP1-G008326	nbis-gene-269	0.435611	NA	NA	NA	NA
HVAEP1-G006090	asmbl_30388	0.435384	CTSO, CTSO	ENSG00000263238, ENSG00000256043	cathepsin O	NA
HVAEP1-G012838	asmbl_29636	0.435297	DDX4	ENSG00000152670	DEAD-box helicase 4	AB047382.1; Cnvas1 for vasa-related protein CnVAS1
HVAEP1-G009424	asmbl_24330	0.435104	CCDC186	ENSG00000165813	coiled-coil domain containing 186	NA
HVAEP1-G019111	asmbl_8687	0.435038	USP32, USP6	ENSG00000170832, ENSG00000129204	ubiquitin specific peptidase 6, ubiquitin specific peptidase 32	NA
HVAEP1-G023874	asmbl_3938	0.434941	GTPBP10	ENSG00000105793	GTP binding protein 10, uncharacterized LOC101927446	NA
HVAEP1-G007590	asmbl_16404	0.434782	DCAF13	ENSG00000164934	DDB1 and CUL4 associated factor 13	NA
HVAEP1-G001328	asmbl_27670	0.4345	DGAT2L6, AWAT2, AWAT1, MOGAT3, DGAT2, MOGAT2, MOGAT1	ENSG00000184210, ENSG00000147160, ENSG00000204195, ENSG00000106384, ENSG00000062282, ENSG00000166391, ENSG00000124003	acyl-CoA wax alcohol acyltransferase 2, diacylglycerol O-acyltransferase 2 like 6, acyl-CoA wax alcohol acyltransferase 1, monoacylglycerol O-acyltransferase 3, diacylglycerol O-acyltransferase 2, monoacylglycerol O-acyltransferase 1, monoacylglycerol O-acyltransferase 2	NA
HVAEP1-G011562	asmbl_59494	0.434458	CCDC51	ENSG00000164051	coiled-coil domain containing 51	NA
HVAEP1-G003662	asmbl_48709	0.434319	CFAP157	ENSG00000160401	cilia and flagella associated protein 157	NA
HVAEP1-G019519	asmbl_69274	0.433776	KANSL1, KANSL1, KANSL1, KANSL1L	ENSG00000278458, ENSG00000275867, ENSG00000120071, ENSG00000144445	KAT8 regulatory NSL complex subunit 1, KAT8 regulatory NSL complex subunit 1 like	NA
HVAEP1-G018663	asmbl_37138	0.433268	MVP	ENSG00000013364	major vault protein	NA
HVAEP1-G006198	asmbl_72925	0.43322	ATMIN	ENSG00000166454	ATM interactor	NA
HVAEP1-G025148	asmbl_25080	0.433118	GKAP1	ENSG00000165113	G kinase anchoring protein 1	NA
HVAEP1-G008022	asmbl_60564	0.432732	NA	NA	NA	NA
HVAEP1-G023242	asmbl_23952	0.432695	CDK1	ENSG00000170312	cyclin dependent kinase 1	NA
HVAEP1-G016256	asmbl_34557	0.432679	ZMAT5	ENSG00000100319	zinc finger matrin-type 5	NA
HVAEP1-G023656	asmbl_4546	0.432503	NA	NA	NA	NA
HVAEP1-G025806	asmbl_52794	0.432435	MRPS30	ENSG00000112996	mitochondrial ribosomal protein S30	NA
HVAEP1-G001290	asmbl_16514	0.432361	BCL10	ENSG00000142867	BCL10 immune signaling adaptor	NA
HVAEP1-G002979	asmbl_71156	0.432331	NA	NA	NA	NA
HVAEP1-G016374	asmbl_7626	0.432032	SPATA7	ENSG00000042317	spermatogenesis associated 7	NA
HVAEP1-G003332	asmbl_87096	0.431952	KRR1	ENSG00000111615	KRR1 small subunit processome component homolog	NA
HVAEP1-G026978	asmbl_58027	0.431413	NA	NA	NA	NA
HVAEP1-G003815	asmbl_11065	0.431337	CDC7	ENSG00000097046	cell division cycle 7	NA
HVAEP1-G020076	asmbl_77924	0.431149	ALKBH1	ENSG00000100601	alkB homolog 1, histone H2A dioxygenase	NA
HVAEP1-G006489	asmbl_48107	0.431123	NGDN	ENSG00000129460	neuroguidin	NA
HVAEP1-G023713	asmbl_39126	0.430915	CG11790	FBgn0039265	NA	NA
HVAEP1-G006581	asmbl_61964	0.430858	CPEB2, CPEB4, CPEB3	ENSG00000137449, ENSG00000113742, ENSG00000107864	cytoplasmic polyadenylation element binding protein 2, cytoplasmic polyadenylation element binding protein 3, cytoplasmic polyadenylation element binding protein 4	NA
HVAEP1-G021476	asmbl_67166	0.430839	MIIP	ENSG00000116691	migration and invasion inhibitory protein	NA
HVAEP1-G022014	asmbl_76015	0.430746	NA	NA	NA	NA
HVAEP1-G011632	asmbl_33331	0.430457	NA	NA	NA	NA
HVAEP1-G010513	asmbl_27258	0.430431	HNRNPU, HNRNPUL2-BSCL2, HNRNPUL2, HNRNPUL1	ENSG00000153187, ENSG00000234857, ENSG00000214753, ENSG00000105323	heterogeneous nuclear ribonucleoprotein U like 1, , heterogeneous nuclear ribonucleoprotein U like 2, heterogeneous nuclear ribonucleoprotein U	NA
HVAEP1-G016119	asmbl_90010	0.430215	RPS27AP5, RPS27A	ENSG00000231767, ENSG00000143947	ribosomal protein S27a,	NA
HVAEP1-G026207	asmbl_57176	0.430141	LENG9, LENG9, LENG9, LENG9	ENSG00000278312, ENSG00000275183, ENSG00000274495, ENSG00000273574	leukocyte receptor cluster member 9	NA
HVAEP1-G004612	asmbl_33493	0.42973	ALDH9A1	ENSG00000143149	aldehyde dehydrogenase 9 family member A1	NA
HVAEP1-G011550	asmbl_27118	0.429706	KPNB1	ENSG00000108424	karyopherin subunit beta 1	NA
HVAEP1-G010028	asmbl_8109	0.429571	NA	NA	NA	AY162285.1; 14-3-3 protein B
HVAEP1-G010510	asmbl_55688	0.429069	NA	NA	NA	KC751429.1; Eph1 protein
HVAEP1-G009365	asmbl_50050	0.429015	NOC3L	ENSG00000173145	NOC3 like DNA replication regulator	NA
HVAEP1-G013483	asmbl_37368	0.428525	ZRANB2	ENSG00000132485	zinc finger RANBP2-type containing 2	NA
HVAEP1-G008870	asmbl_13293	0.42844	TAF6	ENSG00000106290	TATA-box binding protein associated factor 6	NA
HVAEP1-G016510	CLYHEMG019939	0.428263	NA	NA	NA	NA
HVAEP1-G001871	asmbl_47582	0.428253	SF3B6	ENSG00000115128	splicing factor 3b subunit 6	NA
HVAEP1-G010006	CLYHEMG004948	0.428237	T01E8.1	WBGene00011331	hypothetical protein	NA
HVAEP1-G003951	asmbl_83280	0.428118	NA	NA	NA	NA
HVAEP1-G023507	CLYHEMG002954	0.428101	STXBP3, STXBP2, STXBP1	ENSG00000116266, ENSG00000076944, ENSG00000136854	syntaxin binding protein 1, syntaxin binding protein 2, syntaxin binding protein 3	NA
HVAEP1-G004247	asmbl_65329	0.427778	PPP1R10, PPP1R10, PPP1R10, PPP1R10, PPP1R10, PPP1R10, PPP1R10	ENSG00000235291, ENSG00000238104, ENSG00000231737, ENSG00000227804, ENSG00000230995, ENSG00000206489, ENSG00000204569	protein phosphatase 1 regulatory subunit 10	NA
HVAEP1-G016622	asmbl_50185	0.427681	CCDC97	ENSG00000142039	coiled-coil domain containing 97	NA
HVAEP1-G027585	asmbl_60074	0.427078	NA	NA	NA	NA
HVAEP1-G000647	CLYHEMG024961	0.42689	CG2816	FBgn0031564	NA	AY225467.1; chordin-like protein
HVAEP1-G010738	asmbl_48150	0.426746	NA	NA	NA	AF162671.1; endothelin converting enzyme (ECE)
HVAEP1-G027989	asmbl_9052	0.426742	CPSF1, CPSF1	ENSG00000285049, ENSG00000071894	cleavage and polyadenylation specific factor 1	NA
HVAEP1-G009332	asmbl_48072	0.426452	PRDM13	ENSG00000112238	PR/SET domain 13	NA
HVAEP1-G017631	CLYHEMG009140	0.426268	SLC25A45, SLC25A47, SLC25A48	ENSG00000162241, ENSG00000140107, ENSG00000145832	solute carrier family 25 member 47, solute carrier family 25 member 48, solute carrier family 25 member 45	NA
HVAEP1-G023095	asmbl_36049	0.425958	EIF3I	ENSG00000084623	eukaryotic translation initiation factor 3 subunit I	NA
HVAEP1-G018842	asmbl_77591	0.425875	METTL16	ENSG00000127804	methyltransferase like 16	NA
HVAEP1-G021940	asmbl_59804	0.425571	ATRX	ENSG00000085224	ATRX chromatin remodeler	NA
HVAEP1-G016884	asmbl_31911	0.425528	SNX6, SNX5, SNX32	ENSG00000129515, ENSG00000089006, ENSG00000172803	sorting nexin 5, sorting nexin 6, sorting nexin 32	NA
HVAEP1-G012146	asmbl_90351	0.425486	WDR33	ENSG00000136709	WD repeat domain 33	NA
HVAEP1-G001929	asmbl_81327	0.424976	GFM1	ENSG00000168827	G elongation factor mitochondrial 1	NA
HVAEP1-G008402	asmbl_67661	0.424847	MYEF2, HNRNPM	ENSG00000104177, ENSG00000099783	myelin expression factor 2, heterogeneous nuclear ribonucleoprotein M	NA
HVAEP1-G015254	asmbl_24170	0.424403	RPL13A	ENSG00000142541	ribosomal protein L13a	NA
HVAEP1-G024910	asmbl_37305	0.424389	IQGAP3, IQGAP1, IQGAP2	ENSG00000183856, ENSG00000140575, ENSG00000145703	IQ motif containing GTPase activating protein 2, IQ motif containing GTPase activating protein 1, IQ motif containing GTPase activating protein 3	AF139186.1; IQGAP
HVAEP1-G016721	asmbl_89828	0.424101	ACTN4, ACTN4, ACTN1, ACTN3, ACTN2	ENSG00000282844, ENSG00000130402, ENSG00000072110, ENSG00000248746, ENSG00000077522	actinin alpha 4, actinin alpha 1, actinin alpha 2, actinin alpha 3	NA
HVAEP1-G019990	asmbl_45362	0.424091	RPS13	ENSG00000110700	ribosomal protein S13	NA
HVAEP1-G022342	asmbl_42923	0.423554	SETD7	ENSG00000145391	SET domain containing 7, histone lysine methyltransferase	NA
HVAEP1-G025610	asmbl_79209	0.423418	MEF2B, BORCS8-MEF2B, MEF2C, MEF2D, MEF2A	ENSG00000213999, ENSG00000064489, ENSG00000081189, ENSG00000116604, ENSG00000068305	, myocyte enhancer factor 2A, myocyte enhancer factor 2C, BORCS8-MEF2B readthrough, myocyte enhancer factor 2B, myocyte enhancer factor 2D	NA
HVAEP1-G013230	asmbl_34001	0.423395	DMAP1	ENSG00000178028	DNA methyltransferase 1 associated protein 1	NA
HVAEP1-G016037	asmbl_31420	0.42327	tpi-1	WBGene00006601	Triosephosphate isomerase	NA
HVAEP1-G027444	asmbl_26154	0.423206	MRPS16	ENSG00000182180	mitochondrial ribosomal protein S16	NA
HVAEP1-G022061	asmbl_36007	0.422995	MEP1A	ENSG00000112818	meprin A subunit alpha	NA
HVAEP1-G018510	asmbl_63441	0.422845	C12orf65	ENSG00000130921	chromosome 12 open reading frame 65	NA
HVAEP1-G015668	asmbl_85203	0.422763	SERTAD2, CDCA4	ENSG00000179833, ENSG00000170779	cell division cycle associated 4, SERTA domain containing 2	NA
HVAEP1-G001892	asmbl_53526	0.422762	NA	NA	NA	NA
HVAEP1-G006934	asmbl_2204	0.422651	PRDX4	ENSG00000123131	peroxiredoxin 4	NA
HVAEP1-G003366	asmbl_11021	0.422156	XRCC5	ENSG00000079246	X-ray repair cross complementing 5	NA
HVAEP1-G016167	asmbl_66436	0.421398	EIF2B1	ENSG00000111361	eukaryotic translation initiation factor 2B subunit alpha	NA
HVAEP1-G004653	asmbl_47657	0.421285	CHCHD5	ENSG00000125611	coiled-coil-helix-coiled-coil-helix domain containing 5	NA
HVAEP1-G023960	asmbl_31220	0.421279	PARP1	ENSG00000143799	poly(ADP-ribose) polymerase 1	NA
HVAEP1-G001120	asmbl_80222	0.421233	VANGL2, VANGL1	ENSG00000162738, ENSG00000173218	VANGL planar cell polarity protein 1, VANGL planar cell polarity protein 2	AM263457.1; putative Strabismus/VanGogh protein (stbm gene), strain Basel
HVAEP1-G002017	asmbl_15355	0.421148	TRIP12	ENSG00000153827	thyroid hormone receptor interactor 12	NA
HVAEP1-G025588	CLYHEMG019372	0.421133	REEP5, REEP6	ENSG00000129625, ENSG00000115255	receptor accessory protein 6, receptor accessory protein 5	NA
HVAEP1-G018354	asmbl_49734	0.421055	PCYT2	ENSG00000185813	phosphate cytidylyltransferase 2, ethanolamine	NA
HVAEP1-G023416	asmbl_24001	0.420967	RAB30	ENSG00000137502	RAB30, member RAS oncogene family	NA
HVAEP1-G021576	asmbl_35875	0.420675	ILK	ENSG00000166333	integrin linked kinase	NA
HVAEP1-G018317	asmbl_37082	0.420509	RNF25	ENSG00000163481	ring finger protein 25	NA
HVAEP1-G011586	asmbl_90350	0.420344	Agtrap	ENSMUSG00000029007	angiotensin II, type I receptor-associated protein	NA
HVAEP1-G021794	asmbl_41345	0.420331	MESR3	FBgn0032694	NA	NA
HVAEP1-G027785	CLYHEMG013820	0.419904	NA	NA	NA	NA
HVAEP1-G021892	asmbl_8571	0.419059	TTI2	ENSG00000129696	TELO2 interacting protein 2	NA
HVAEP1-G025389	asmbl_39573	0.418916	CCT3	ENSG00000163468	chaperonin containing TCP1 subunit 3	NA
HVAEP1-G023648	asmbl_75978	0.418879	GEMIN5	ENSG00000082516	gem nuclear organelle associated protein 5	NA
HVAEP1-G022179	asmbl_6056	0.418848	NA	NA	NA	NA
HVAEP1-G026413	asmbl_34564	0.418717	G6PD	ENSG00000160211	glucose-6-phosphate dehydrogenase	NA
HVAEP1-G026982	asmbl_4879	0.418698	UTP23	ENSG00000147679	UTP23 small subunit processome component	NA
HVAEP1-G001575	asmbl_87180	0.418596	NA	NA	NA	NA
HVAEP1-G023227	asmbl_62788	0.418442	sol-1	WBGene00004944	Suppressor of lurcher protein 1	NA
HVAEP1-G009027	asmbl_3348	0.418135	LSM3	ENSG00000170860	LSM3 homolog, U6 small nuclear RNA and mRNA degradation associated	NA
HVAEP1-G019193	asmbl_35749	0.418078	NA	NA	NA	NA
HVAEP1-G021437	asmbl_3943	0.418027	NA	NA	NA	NA
HVAEP1-G022354	asmbl_43958	0.417973	NA	NA	NA	NA
HVAEP1-G007117	asmbl_46762	0.4179	CCT8L2, CCT8	ENSG00000198445, ENSG00000156261	chaperonin containing TCP1 subunit 8 like 2, chaperonin containing TCP1 subunit 8	NA
HVAEP1-G007265	CLYHEMG000842	0.417779	ATP5PO	ENSG00000241837	ATP synthase peripheral stalk subunit OSCP	NA
HVAEP1-G024894	asmbl_5730	0.417637	KCNK9, KCNK15, KCNK3	ENSG00000169427, ENSG00000124249, ENSG00000171303	potassium two pore domain channel subfamily K member 15, potassium two pore domain channel subfamily K member 3, potassium two pore domain channel subfamily K member 9	NA
HVAEP1-G019068	asmbl_914	0.417221	fkb-6, fkb-2, fkb-8	WBGene00001431, WBGene00001427, WBGene00001433	Peptidylprolyl isomerase	NA
HVAEP1-G021663	asmbl_9843	0.417144	RRAS, RRAS2	ENSG00000126458, ENSG00000133818	RAS related 2, RAS related	X70839.1; RAS2 protein
HVAEP1-G006968	asmbl_62492	0.41699	GEMIN6	ENSG00000152147	gem nuclear organelle associated protein 6	NA
HVAEP1-G003797	asmbl_19860	0.415997	RUVBL2	ENSG00000183207	RuvB like AAA ATPase 2	NA
HVAEP1-G023406	asmbl_62998	0.415987	EXOSC9	ENSG00000123737	exosome component 9	NA
HVAEP1-G012052	asmbl_84993	0.415944	NA	NA	NA	NA
HVAEP1-G021580	asmbl_35952	0.415891	STIM1, STIM2	ENSG00000167323, ENSG00000109689	stromal interaction molecule 2, stromal interaction molecule 1	NA
HVAEP1-G018298	asmbl_40175	0.415867	TMEM134	ENSG00000172663	transmembrane protein 134	NA
HVAEP1-G004354	asmbl_80662	0.415435	NA	NA	NA	NA
HVAEP1-G011664	asmbl_27160	0.414845	VAMP1, VAMP2, VAMP3	ENSG00000139190, ENSG00000220205, ENSG00000049245	vesicle associated membrane protein 1, vesicle associated membrane protein 3, vesicle associated membrane protein 2	NA
HVAEP1-G022660	asmbl_76007	0.414161	PUS3	ENSG00000110060	pseudouridine synthase 3	NA
HVAEP1-G020071	asmbl_54380	0.413723	DAZL, DAZ3, DAZ2, DAZ1, DAZ4	ENSG00000092345, ENSG00000187191, ENSG00000205944, ENSG00000188120, ENSG00000205916	deleted in azoospermia 2, deleted in azoospermia 4, deleted in azoospermia 1, deleted in azoospermia 3, deleted in azoospermia like	NA
HVAEP1-G006173	asmbl_34960	0.413676	SRP72	ENSG00000174780	signal recognition particle 72	NA
HVAEP1-G028480	asmbl_12471	0.413441	NA	NA	NA	NA
HVAEP1-G024494	asmbl_45579	0.413354	NA	NA	NA	NA
HVAEP1-G025840	asmbl_32952	0.413188	DYNC2LI1	ENSG00000138036	dynein cytoplasmic 2 light intermediate chain 1	NA
HVAEP1-G006257	asmbl_71439	0.412613	NOA1	ENSG00000084092	nitric oxide associated 1	NA
HVAEP1-G021300	asmbl_9607	0.412469	LRRC59	ENSG00000108829	leucine rich repeat containing 59	DQ449927.1; leucine-rich repeat 1 (LRR-1)
HVAEP1-G020698	asmbl_36588	0.41242	ATP5MC2, ATP5MC3, ATP5MC1	ENSG00000135390, ENSG00000154518, ENSG00000159199	ATP synthase membrane subunit c locus 2, ATP synthase membrane subunit c locus 3, ATP synthase membrane subunit c locus 1	NA
HVAEP1-G020927	asmbl_17303	0.412211	CHMP5	ENSG00000086065	charged multivesicular body protein 5	NA
HVAEP1-G020734	asmbl_36594	0.412202	ATG9B, ATG9A	ENSG00000181652, ENSG00000198925	autophagy related 9B, autophagy related 9A	NA
HVAEP1-G008406	asmbl_41989	0.411971	EXOSC4	ENSG00000178896	exosome component 4	NA
HVAEP1-G002015	asmbl_53335	0.41189	NA	NA	NA	NA
HVAEP1-G007608	asmbl_74320	0.411759	MCM3AP	ENSG00000160294	minichromosome maintenance complex component 3 associated protein	NA
HVAEP1-G004921	asmbl_42408	0.411101	DPH5	ENSG00000117543	diphthamide biosynthesis 5	NA
HVAEP1-G006670	asmbl_30387	0.410872	NA	NA	NA	NA
HVAEP1-G021325	asmbl_63551	0.410737	USP14	ENSG00000101557	ubiquitin specific peptidase 14	NA
HVAEP1-G021082	asmbl_9738	0.410669	ABITRAM	ENSG00000119328	actin binding transcription modulator	NA
HVAEP1-G020943	asmbl_66062	0.410437	TBC1D5	ENSG00000131374	TBC1 domain family member 5	NA
HVAEP1-G004946	asmbl_17619	0.410376	AIMP1	ENSG00000164022	aminoacyl tRNA synthetase complex interacting multifunctional protein 1	NA
HVAEP1-G003016	asmbl_60273	0.410118	RCN1, RCN3, CALU	ENSG00000049449, ENSG00000142552, ENSG00000128595	reticulocalbin 1, reticulocalbin 3, calumenin	NA
HVAEP1-G026429	asmbl_8873	0.409954	PBRM1	ENSG00000163939	polybromo 1	NA
HVAEP1-G016436	asmbl_75772	0.409859	SPO11	ENSG00000054796	SPO11 initiator of meiotic double stranded breaks	NA
HVAEP1-G021155	asmbl_8537	0.409467	CCDC148	ENSG00000153237	coiled-coil domain containing 148	NA
HVAEP1-G022002	asmbl_48703	0.409408	T21F4.1	WBGene00020658	hypothetical protein	NA
HVAEP1-G009891	asmbl_57028	0.409345	NA	NA	NA	NA
HVAEP1-G001326	asmbl_18927	0.409305	NA	NA	NA	LN868233.1; Contactin-associated protein 4 (CNTNAP4 gene), strain Jussy
HVAEP1-G003882	asmbl_61905	0.409286	NA	NA	NA	NA
HVAEP1-G003991	asmbl_68960	0.409208	AIFM3	ENSG00000183773	apoptosis inducing factor mitochondria associated 3	NA
HVAEP1-G013075	asmbl_19379	0.408987	DIMT1	ENSG00000086189	DIMT1 rRNA methyltransferase and ribosome maturation factor	NA
HVAEP1-G009590	asmbl_49663	0.408841	RPS24	ENSG00000138326	ribosomal protein S24	NA
HVAEP1-G001261	asmbl_81023	0.408764	XRCC1	ENSG00000073050	X-ray repair cross complementing 1	NA
HVAEP1-G003790	asmbl_18165	0.408699	CG4558	FBgn0029914	NA	NA
HVAEP1-G001410	asmbl_73214	0.408604	NA	NA	NA	NA
HVAEP1-G010578	asmbl_76341	0.408574	NABP1, NABP2	ENSG00000173559, ENSG00000139579	nucleic acid binding protein 2, nucleic acid binding protein 1	NA
HVAEP1-G009201	asmbl_46805	0.408565	NA	NA	NA	NA
HVAEP1-G011706	CLYHEMG001618	0.408332	XXYLT1	ENSG00000173950	xyloside xylosyltransferase 1	NA
HVAEP1-G009975	asmbl_83841	0.40823	RASEF	ENSG00000165105	RAS and EF-hand domain containing	NA
HVAEP1-G020798	asmbl_26310	0.408125	MITD1	ENSG00000158411	microtubule interacting and trafficking domain containing 1	NA
HVAEP1-G020951	asmbl_45405	0.408039	EEF1B2, EEF1B2	ENSG00000283391, ENSG00000114942	eukaryotic translation elongation factor 1 beta 2	NA
HVAEP1-G023663	asmbl_36184	0.407991	TCEA2, TCEA1, TCEA3, TCEA3	ENSG00000171703, ENSG00000187735, ENSG00000282941, ENSG00000204219	transcription elongation factor A3, transcription elongation factor A2, transcription elongation factor A1	NA
HVAEP1-G010790	asmbl_27080	0.407921	AFAP1, AFAP1L1, AFAP1L2	ENSG00000196526, ENSG00000157510, ENSG00000169129	actin filament associated protein 1, actin filament associated protein 1 like 2, actin filament associated protein 1 like 1	NA
HVAEP1-G016586	CLYHEMG016250	0.407909	NA	NA	NA	NA
HVAEP1-G016871	asmbl_26757	0.407853	DPP3	ENSG00000254986	dipeptidyl peptidase 3	NA
HVAEP1-G020685	asmbl_62712	0.407619	TSN	ENSG00000211460	translin	NA
HVAEP1-G020784	asmbl_45516	0.407595	SMARCD3, SMARCD2, SMARCD1	ENSG00000082014, ENSG00000108604, ENSG00000066117	SWI/SNF related, matrix associated, actin dependent regulator of chromatin, subfamily d, member 1, SWI/SNF related, matrix associated, actin dependent regulator of chromatin, subfamily d, member 3, SWI/SNF related, matrix associated, actin dependent regulator of chromatin, subfamily d, member 2	NA
HVAEP1-G025493	asmbl_31531	0.407157	C01H6.3	WBGene00007253	hypothetical protein	NA
HVAEP1-G026407	asmbl_58261	0.407144	CHCHD4	ENSG00000163528	coiled-coil-helix-coiled-coil-helix domain containing 4	NA
HVAEP1-G028154	asmbl_39436	0.407017	C12orf43	ENSG00000157895	chromosome 12 open reading frame 43	NA
HVAEP1-G021781	asmbl_31026	0.406974	CDKN1A, CDKN1C, CDKN1C, CDKN1B	ENSG00000124762, ENSG00000273707, ENSG00000129757, ENSG00000111276	cyclin dependent kinase inhibitor 1C, cyclin dependent kinase inhibitor 1A, cyclin dependent kinase inhibitor 1B	NA
HVAEP1-G005843	asmbl_27731	0.406803	DEPTOR	ENSG00000155792	DEP domain containing MTOR interacting protein	NA
HVAEP1-G021726	asmbl_67180	0.406742	MED17	ENSG00000042429	mediator complex subunit 17	NA
HVAEP1-G026825	asmbl_58199	0.406708	RNF113A, RNF113B	ENSG00000125352, ENSG00000139797	ring finger protein 113B, ring finger protein 113A	NA
HVAEP1-G025423	asmbl_84890	0.406655	NA	NA	NA	NA
HVAEP1-G016439	asmbl_84227	0.406327	SRPRB	ENSG00000144867	SRP receptor subunit beta	NA
HVAEP1-G015255	asmbl_24166	0.406269	NOL11	ENSG00000130935	nucleolar protein 11	NA
HVAEP1-G012805	asmbl_25511	0.406174	TNPO2, TNPO1	ENSG00000105576, ENSG00000083312	transportin 1, transportin 2	NA
HVAEP1-G008897	asmbl_60610	0.406056	STT3A	ENSG00000134910	STT3 oligosaccharyltransferase complex catalytic subunit A	NA
HVAEP1-G022977	asmbl_73943	0.405777	C8orf44-SGK3, SGK3, SGK1, SGK2	ENSG00000288602, ENSG00000104205, ENSG00000118515, ENSG00000101049	serum/glucocorticoid regulated kinase 2, serum/glucocorticoid regulated kinase family member 3, C8orf44-SGK3 readthrough, serum/glucocorticoid regulated kinase 1	NA
HVAEP1-G016457	asmbl_63626	0.405575	MCM9	ENSG00000111877	minichromosome maintenance 9 homologous recombination repair factor	NA
HVAEP1-G024543	asmbl_12478	0.405553	skil	ENSXETG00000034936	cysteine/histidine-rich 1	NA
HVAEP1-G024024	asmbl_21128	0.40551	NA	NA	NA	NA
HVAEP1-G019076	asmbl_55968	0.405006	GGT5, GGTLC3, GGT2, GGTLC1, GGT1, GGTLC2	ENSG00000099998, ENSG00000274252, ENSG00000133475, ENSG00000149435, ENSG00000100031, ENSG00000100121	gamma-glutamyltransferase 2, gamma-glutamyltransferase light chain family member 3, gamma-glutamyltransferase light chain 2, gamma-glutamyltransferase light chain 1, gamma-glutamyltransferase 1, gamma-glutamyltransferase 5	NA
HVAEP1-G020113	asmbl_78375	0.404728	PTPRN, PTPRN2	ENSG00000054356, ENSG00000155093	protein tyrosine phosphatase receptor type N2, protein tyrosine phosphatase receptor type N	NA
HVAEP1-G019447	asmbl_45356	0.404539	ORC2	ENSG00000115942	origin recognition complex subunit 2	NA
HVAEP1-G007955	asmbl_60640	0.404518	SPEF1	ENSG00000101222	sperm flagellar 1	NA
HVAEP1-G019080	asmbl_15366	0.404194	NA	NA	NA	NA
HVAEP1-G011591	asmbl_53558	0.404131	NA	NA	NA	AY899806.1; thypedin
HVAEP1-G008240	asmbl_38737	0.404115	RAD21L1, RAD21	ENSG00000244588, ENSG00000164754	RAD21 cohesin complex component like 1, RAD21 cohesin complex component	NA
HVAEP1-G019414	asmbl_45275	0.403983	BZW1, BZW2	ENSG00000082153, ENSG00000136261	basic leucine zipper and W2 domains 2, basic leucine zipper and W2 domains 1	NA
HVAEP1-G011246	asmbl_80691	0.403911	NA	NA	NA	NA
HVAEP1-G012410	asmbl_4843	0.403911	HSPBP1	ENSG00000133265	HSPA (Hsp70) binding protein 1	NA
HVAEP1-G019326	asmbl_8033	0.403877	SPNS1, SPNS3, SPNS2	ENSG00000169682, ENSG00000182557, ENSG00000183018	sphingolipid transporter 1 (putative), sphingolipid transporter 3 (putative), sphingolipid transporter 2	NA
HVAEP1-G017634	asmbl_49910	0.402848	WDR92	ENSG00000243667	WD repeat domain 92	NA
HVAEP1-G008299	asmbl_78749	0.402688	KDM1B	ENSG00000165097	lysine demethylase 1B	NA
HVAEP1-G011194	asmbl_29963	0.402512	NA	NA	NA	NA
HVAEP1-G028144	asmbl_82896	0.402467	ZC3H18	ENSG00000158545	zinc finger CCCH-type containing 18	NA
HVAEP1-G001413	asmbl_53537	0.402	DDX51, DDX51	ENSG00000288503, ENSG00000185163	DEAD-box helicase 51	NA
HVAEP1-G021338	asmbl_73223	0.401585	NA	NA	NA	NA
HVAEP1-G016027	asmbl_74718	0.401478	OMA1	ENSG00000162600	OMA1 zinc metallopeptidase	NA
HVAEP1-G027708	asmbl_85877	0.40128	CTNNBL1	ENSG00000132792	catenin beta like 1	NA
HVAEP1-G019415	asmbl_72152	0.401179	Pkg21D, CG4839	FBgn0000442, FBgn0032187	NA	NA
HVAEP1-G021728	asmbl_41642	0.400957	NA	NA	NA	NA
HVAEP1-G020541	asmbl_9767	0.400635	NA	NA	NA	NA
HVAEP1-G027215	asmbl_45838	0.400558	MOB2	ENSG00000182208	MOB kinase activator 2	NA
HVAEP1-G013866	asmbl_64590	0.399257	NA	NA	NA	NA
HVAEP1-G020836	asmbl_40291	0.399019	NA	NA	NA	NA
HVAEP1-G025687	asmbl_51976	0.398976	ARID3C, ARID3A, ARID3B	ENSG00000205143, ENSG00000116017, ENSG00000179361	AT-rich interaction domain 3A, AT-rich interaction domain 3C, AT-rich interaction domain 3B	NA
HVAEP1-G007963	asmbl_42141	0.398906	NA	NA	NA	NA
HVAEP1-G003958	asmbl_67937	0.398758	ARMC9	ENSG00000135931	armadillo repeat containing 9	NA
HVAEP1-G024553	CLYHEMG016876	0.398631	RPL36	ENSG00000130255	ribosomal protein L36	NA
HVAEP1-G011611	asmbl_89197	0.398252	NA	NA	NA	NA
HVAEP1-G011783	asmbl_33832	0.39811	NA	NA	NA	NA
HVAEP1-G014001	asmbl_22763	0.397955	CCDC137	ENSG00000185298	coiled-coil domain containing 137	NA
HVAEP1-G006204	asmbl_27726	0.39788	NA	NA	NA	NA
HVAEP1-G007774	asmbl_38304	0.397846	RPN2	ENSG00000118705	ribophorin II	NA
HVAEP1-G014367	asmbl_32476	0.397725	WDR72, WDR7	ENSG00000166415, ENSG00000091157	WD repeat domain 7, WD repeat domain 72	NA
HVAEP1-G018980	asmbl_56813	0.39767	NA	NA	NA	NA
HVAEP1-G018150	asmbl_29751	0.397618	RPP30	ENSG00000148688	ribonuclease P/MRP subunit p30	NA
HVAEP1-G006931	asmbl_4134	0.397493	NA	NA	NA	NA
HVAEP1-G019547	CLYHEMG006413	0.397432	PDK2, PDK4, PDK1, PDK3	ENSG00000005882, ENSG00000004799, ENSG00000152256, ENSG00000067992	pyruvate dehydrogenase kinase 3, pyruvate dehydrogenase kinase 4, pyruvate dehydrogenase kinase 1, pyruvate dehydrogenase kinase 2	NA
HVAEP1-G016253	asmbl_31930	0.397217	RPS20	ENSG00000008988	ribosomal protein S20	NA
HVAEP1-G021283	CLYHEMG001511	0.397207	NA	NA	NA	NA
HVAEP1-G009202	asmbl_46812	0.396735	QKI	ENSG00000112531	QKI, KH domain containing RNA binding	NA
HVAEP1-G022523	asmbl_44984	0.396675	NA	NA	NA	NA
HVAEP1-G006457	asmbl_87043	0.396626	TAF12	ENSG00000120656	TATA-box binding protein associated factor 12	NA
HVAEP1-G014736	asmbl_61742	0.396579	EME1, EME2	ENSG00000154920, ENSG00000197774	essential meiotic structure-specific endonuclease subunit 2, essential meiotic structure-specific endonuclease 1	NA
HVAEP1-G012148	asmbl_2557	0.396361	SPSB4, SPSB1, SPSB2	ENSG00000175093, ENSG00000171621, ENSG00000111671	splA/ryanodine receptor domain and SOCS box containing 2, uncharacterized LOC105369632, splA/ryanodine receptor domain and SOCS box containing 1, splA/ryanodine receptor domain and SOCS box containing 4	NA
HVAEP1-G010428	asmbl_33318	0.395992	CTNNAL1	ENSG00000119326	catenin alpha like 1	NA
HVAEP1-G001558	asmbl_16476	0.395841	SDHD	ENSG00000204370	succinate dehydrogenase complex subunit D	NA
HVAEP1-G001527	CLYHEMG019999	0.395819	ATP6AP2	ENSG00000182220	ATPase H+ transporting accessory protein 2	NA
HVAEP1-G002542	asmbl_12958	0.395492	MED4	ENSG00000136146	mediator complex subunit 4	NA
HVAEP1-G001455	asmbl_81011	0.395467	PLSCR2, PLSCR1, PLSCR4, PLSCR5, PLSCR3, PLSCR3	ENSG00000163746, ENSG00000188313, ENSG00000114698, ENSG00000231213, ENSG00000284009, ENSG00000187838	phospholipid scramblase 3, phospholipid scramblase 4, phospholipid scramblase 2, phospholipid scramblase 1, phospholipid scramblase family member 5	NA
HVAEP1-G004244	asmbl_83202	0.395222	ATP13A1	ENSG00000105726	ATPase 13A1	NA
HVAEP1-G005890	asmbl_74255	0.39494	NA	NA	NA	NA
HVAEP1-G021418	asmbl_5964	0.394874	TAF3	ENSG00000165632	TATA-box binding protein associated factor 3	NA
HVAEP1-G023401	asmbl_5614	0.394803	SCPEP1	ENSG00000121064	serine carboxypeptidase 1	NA
HVAEP1-G002026	asmbl_26034	0.394532	DLG3, DLG2, DLG4, DLG1	ENSG00000082458, ENSG00000150672, ENSG00000132535, ENSG00000075711	discs large MAGUK scaffold protein 3, discs large MAGUK scaffold protein 1, discs large MAGUK scaffold protein 2, discs large MAGUK scaffold protein 4	NA
HVAEP1-G022381	CLYHEMG010503	0.394487	PWP1	ENSG00000136045	PWP1 homolog, endonuclein	NA
HVAEP1-G011669	asmbl_55294	0.394405	UGDH	ENSG00000109814	UDP-glucose 6-dehydrogenase	NA
HVAEP1-G024423	asmbl_30618	0.394259	him-4	WBGene00001863	High Incidence of Males (increased X chromosome loss)	LN868237.1; Hemicentin 1-like 1 (HMCN1L1 gene), strain Jussy
HVAEP1-G005407	asmbl_28210	0.393935	SUCLG1	ENSG00000163541	succinate-CoA ligase GDP/ADP-forming subunit alpha	NA
HVAEP1-G016558	CLYHEMG003366	0.393744	EIF5	ENSG00000100664	eukaryotic translation initiation factor 5	NA
HVAEP1-G009955	asmbl_66506	0.39367	Kif3C	FBgn0039925	NA	NA
HVAEP1-G018627	CLYHEMG010403	0.393667	NA	NA	NA	NA
HVAEP1-G014752	asmbl_32505	0.393549	NA	NA	NA	NA
HVAEP1-G006081	asmbl_4246	0.39353	RANBP17, XPO7	ENSG00000204764, ENSG00000130227	exportin 7, RAN binding protein 17	NA
HVAEP1-G006047	asmbl_42280	0.393456	ADGB	ENSG00000118492	androglobin	NA
HVAEP1-G007200	CLYHEMG019160	0.393278	AFDN	ENSG00000130396	afadin, adherens junction formation factor	NA
HVAEP1-G017541	asmbl_45214	0.392674	NA	NA	NA	NA
HVAEP1-G025285	CLYHEMG001518	0.392624	RPS17, RPS17	ENSG00000278229, ENSG00000182774	ribosomal protein S17	NA
HVAEP1-G014730	asmbl_8190	0.392541	RPS2	ENSG00000140988	ribosomal protein S2	NA
HVAEP1-G024310	asmbl_25117	0.392413	ARL14EPL	ENSG00000268223	ADP ribosylation factor like GTPase 14 effector protein like	NA
HVAEP1-G021509	asmbl_849	0.391947	ABCE1	ENSG00000164163	ATP binding cassette subfamily E member 1	NA
HVAEP1-G006396	asmbl_26749	0.391799	hmg-5	WBGene00001975	HMG	NA
HVAEP1-G016641	CLYHEMG009123	0.391667	MEA1	ENSG00000124733	male-enhanced antigen 1	NA
HVAEP1-G011563	asmbl_71014	0.391481	Rho1	FBgn0014020	NA	NA
HVAEP1-G022842	asmbl_58758	0.391381	SIRT1	ENSG00000096717	sirtuin 1	NA
HVAEP1-G021499	asmbl_23149	0.391254	NA	NA	NA	NA
HVAEP1-G026861	asmbl_47900	0.391102	RPL18A	ENSG00000105640	ribosomal protein L18a	NA
HVAEP1-G010364	asmbl_50951	0.391049	spl-1, spl-2, spl-3	WBGene00004981, WBGene00006418, WBGene00022427	Sphingosine-1-phosphate lyase, Sphingosine Phosphate Lyase	NA
HVAEP1-G022078	asmbl_20462	0.390771	RMC1	ENSG00000141452	regulator of MON1-CCZ1	NA
HVAEP1-G006845	asmbl_54398	0.390716	WARS2	ENSG00000116874	tryptophanyl tRNA synthetase 2, mitochondrial	NA
HVAEP1-G018893	asmbl_35767	0.390465	NAA25	ENSG00000111300	N-alpha-acetyltransferase 25, NatB auxiliary subunit	NA
HVAEP1-G023652	asmbl_21098	0.389484	NA	NA	NA	NA
HVAEP1-G020295	CLYHEMG015694	0.38877	ENKUR	ENSG00000151023	enkurin, TRPC channel interacting protein	NA
HVAEP1-G023064	asmbl_75961	0.388519	NA	NA	NA	NA
HVAEP1-G008382	asmbl_14107	0.388389	THEG	ENSG00000105549	theg spermatid protein	NA
HVAEP1-G021352	asmbl_11240	0.388214	ARHGEF17	ENSG00000110237	Rho guanine nucleotide exchange factor 17	NA
HVAEP1-G024119	asmbl_69135	0.388147	METTL17	ENSG00000165792	methyltransferase like 17	NA
HVAEP1-G014646	asmbl_61779	0.387504	LUC7L, LUC7L2, FMC1-LUC7L2	ENSG00000007392, ENSG00000146963, ENSG00000269955	LUC7 like, LUC7 like 2, pre-mRNA splicing factor, FMC1-LUC7L2 readthrough	NA
HVAEP1-G017221	asmbl_62097	0.387334	PDCD2	ENSG00000071994	programmed cell death 2	NA
HVAEP1-G003700	asmbl_5080	0.386851	POLE3	ENSG00000148229	DNA polymerase epsilon 3, accessory subunit	NA
HVAEP1-G014319	asmbl_89458	0.386751	GID4	ENSG00000141034	GID complex subunit 4 homolog	NA
HVAEP1-G027861	asmbl_91416	0.386695	ADI1, ADI1	ENSG00000280830, ENSG00000182551	acireductone dioxygenase 1	NA
HVAEP1-G011832	asmbl_84656	0.386567	ERLEC1	ENSG00000068912	endoplasmic reticulum lectin 1	NA
HVAEP1-G005912	asmbl_26181	0.386418	HECA	ENSG00000112406	hdc homolog, cell cycle regulator	NA
HVAEP1-G023936	asmbl_3986	0.386179	POLR3B	ENSG00000013503	RNA polymerase III subunit B	NA
HVAEP1-G024308	asmbl_45581	0.38611	GPR89A, GPR89B	ENSG00000117262, ENSG00000188092	G protein-coupled receptor 89A, G protein-coupled receptor 89B	NA
HVAEP1-G001216	asmbl_2419	0.385956	ARHGEF9, SPATA13, ARHGEF4	ENSG00000131089, ENSG00000182957, ENSG00000136002	spermatogenesis associated 13, Cdc42 guanine nucleotide exchange factor 9, Rho guanine nucleotide exchange factor 4	NA
HVAEP1-G003698	asmbl_5047	0.385943	SEC22B	ENSG00000265808	SEC22 homolog B, vesicle trafficking protein	NA
HVAEP1-G028814	asmbl_3149	0.385853	CCNE2, CCNE1	ENSG00000175305, ENSG00000105173	cyclin E2, cyclin E1	NA
HVAEP1-G012265	asmbl_84995	0.385851	POLR2D	ENSG00000144231	RNA polymerase II subunit D	NA
HVAEP1-G002503	CLYHEMG004555	0.38582	Vha68-1, Vha68-2	FBgn0265262, FBgn0263598	NA	NA
HVAEP1-G016354	asmbl_52243	0.385674	NA	NA	NA	NA
HVAEP1-G020789	asmbl_78845	0.385596	XB5906919	ENSXETG00000012378	provisional ortholog of methylcrotonoyl-CoA carboxylase 2	NA
HVAEP1-G018677	asmbl_13465	0.385545	EEED8.10	WBGene00017138	Putative RNA-binding protein EEED8.10	NA
HVAEP1-G022069	asmbl_85438	0.385501	LMCD1, TES	ENSG00000071282, ENSG00000135269	LIM and cysteine rich domains 1, testin LIM domain protein	NA
HVAEP1-G001504	asmbl_27899	0.385364	AP1S2, AP1S1, AP1S3	ENSG00000182287, ENSG00000106367, ENSG00000152056	adaptor related protein complex 1 subunit sigma 2, adaptor related protein complex 1 subunit sigma 1, adaptor related protein complex 1 subunit sigma 3	NA
HVAEP1-G010222	asmbl_56819	0.385094	PURG, PURB, PURA	ENSG00000172733, ENSG00000146676, ENSG00000185129	purine rich element binding protein B, purine rich element binding protein G, purine rich element binding protein A	NA
HVAEP1-G018629	asmbl_77543	0.385001	SEPTIN1, SEPTIN5, SEPTIN4	ENSG00000180096, ENSG00000184702, ENSG00000108387	septin 5, septin 1, septin 4	NA
HVAEP1-G006964	asmbl_14292	0.384647	CMSS1	ENSG00000184220	cms1 ribosomal small subunit homolog	NA
HVAEP1-G014097	CLYHEMG010909	0.38454	COX6B2, COX6B1	ENSG00000160471, ENSG00000126267	cytochrome c oxidase subunit 6B1, cytochrome c oxidase subunit 6B2	NA
HVAEP1-G026437	asmbl_74287	0.384435	TMEM72	ENSG00000187783	transmembrane protein 72	NA
HVAEP1-G011720	asmbl_10929	0.383663	NA	NA	NA	NA
HVAEP1-G027901	asmbl_5632	0.383597	NDUFAF6	ENSG00000156170	NADH:ubiquinone oxidoreductase complex assembly factor 6	NA
HVAEP1-G026423	asmbl_1909	0.383542	FANCD2	ENSG00000144554	FA complementation group D2	NA
HVAEP1-G026219	asmbl_87435	0.383508	AP3D1	ENSG00000065000	adaptor related protein complex 3 subunit delta 1	NA
HVAEP1-G002107	asmbl_799	0.383507	ACTR8	ENSG00000113812	actin related protein 8	NA
HVAEP1-G011614	asmbl_27286	0.383289		FBgn0000629	NA	NA
HVAEP1-G011733	asmbl_84637	0.383277	Root	FBgn0039152	NA	NA
HVAEP1-G017246	asmbl_87803	0.383121	MRPS10	ENSG00000048544	mitochondrial ribosomal protein S10	NA
HVAEP1-G013755	asmbl_85157	0.382953	ANKFN1	ENSG00000153930	ankyrin repeat and fibronectin type III domain containing 1	NA
HVAEP1-G021633	asmbl_75936	0.38277	PATL2, PATL1	ENSG00000229474, ENSG00000166889	PAT1 homolog 2, PAT1 homolog 1, processing body mRNA decay factor	NA
HVAEP1-G019819	asmbl_60547	0.382363	MTAP	ENSG00000099810	methylthioadenosine phosphorylase	NA
HVAEP1-G008341	asmbl_60513	0.382215	CLK1, CLK4, CLK3, CLK2, CLK2	ENSG00000013441, ENSG00000113240, ENSG00000179335, ENSG00000261893, ENSG00000176444	CDC like kinase 2, CDC like kinase 3, CDC like kinase 4, CDC like kinase 1	NA
HVAEP1-G013444	asmbl_29503	0.382118	PIF1	ENSG00000140451	PIF1 5'-to-3' DNA helicase	NA
HVAEP1-G027063	asmbl_38941	0.382051	C3orf20	ENSG00000131379	chromosome 3 open reading frame 20	NA
HVAEP1-G010535	asmbl_29371	0.382002	SIPA1, SIPA1L2, SIPA1L1, SIPA1L3	ENSG00000213445, ENSG00000116991, ENSG00000197555, ENSG00000105738	signal induced proliferation associated 1 like 1, signal induced proliferation associated 1 like 3, signal-induced proliferation-associated 1, signal induced proliferation associated 1 like 2	NA
HVAEP1-G022811	asmbl_39130	0.3819	NUDT21	ENSG00000167005	nudix hydrolase 21	NA
HVAEP1-G016264	asmbl_43647	0.381311	RAB1A, RAB1B	ENSG00000138069, ENSG00000174903	RAB1A, member RAS oncogene family, RAB1B, member RAS oncogene family	NA
HVAEP1-G018518	asmbl_77474	0.381203	NA	NA	NA	NA
HVAEP1-G012627	asmbl_1810	0.38094	CACNA1S, CACNA1C, CACNA1C, CACNA1F, CACNA1D	ENSG00000081248, ENSG00000285479, ENSG00000151067, ENSG00000102001, ENSG00000157388	calcium voltage-gated channel subunit alpha1 C, CACNA1C intronic transcript 2, calcium voltage-gated channel subunit alpha1 F, calcium voltage-gated channel subunit alpha1 D, calcium voltage-gated channel subunit alpha1 S	AY461595.1; voltage-gated calcium channel alpha-1 subunit
HVAEP1-G017113	asmbl_85473	0.380898	POLR1D	ENSG00000186184	RNA polymerase I and III subunit D	NA
HVAEP1-G008984	asmbl_74352	0.380383	scrib	FBgn0263289	NA	NA
HVAEP1-G012793	asmbl_29663	0.379817	NA	NA	NA	NA
HVAEP1-G009020	asmbl_60661	0.379785	RNGTT	ENSG00000111880	RNA guanylyltransferase and 5'-phosphatase	NA
HVAEP1-G011919	asmbl_89200	0.379504	DR1	ENSG00000117505	down-regulator of transcription 1	NA
HVAEP1-G015941	asmbl_26671	0.37933	MDH1	ENSG00000014641	malate dehydrogenase 1	NA
HVAEP1-G020237	asmbl_44700	0.379311	CG31224	FBgn0051224	NA	NA
HVAEP1-G008359	asmbl_82386	0.379165	ROR2, ROR1, MUSK	ENSG00000169071, ENSG00000185483, ENSG00000030304	muscle associated receptor tyrosine kinase, receptor tyrosine kinase like orphan receptor 2, receptor tyrosine kinase like orphan receptor 1	HM117255.1; strain Ind-Pune receptor tyrosine kinase (MuSK)
HVAEP1-G014683	asmbl_60911	0.378902	SMG1	ENSG00000157106	SMG1 nonsense mediated mRNA decay associated PI3K related kinase	NA
HVAEP1-G018372	asmbl_89600	0.378702	DPH1	ENSG00000108963	diphthamide biosynthesis 1	NA
HVAEP1-G023347	asmbl_73637	0.378125	PDE3A, PDE3B	ENSG00000172572, ENSG00000152270	phosphodiesterase 3B, phosphodiesterase 3A	NA
HVAEP1-G012292	asmbl_18464	0.377993	NA	NA	NA	NA
HVAEP1-G005267	asmbl_79393	0.377343	TTC14	ENSG00000163728	tetratricopeptide repeat domain 14	NA
HVAEP1-G021372	asmbl_36195	0.377081	IREB2, ACO1	ENSG00000136381, ENSG00000122729	aconitase 1, iron responsive element binding protein 2	NA
HVAEP1-G014900	CLYHEMG022099	0.377019	DCXR	ENSG00000169738	dicarbonyl and L-xylulose reductase	NA
HVAEP1-G006321	asmbl_12611	0.376886	CLPTM1	ENSG00000104853	CLPTM1 regulator of GABA type A receptor forward trafficking	NA
HVAEP1-G005281	asmbl_53698	0.376825	CRCP	ENSG00000241258	CGRP receptor component	NA
HVAEP1-G015744	asmbl_85193	0.37668	RBM25	ENSG00000119707	RNA binding motif protein 25	NA
HVAEP1-G018415	asmbl_35693	0.376419	DDX52, DDX52	ENSG00000277594, ENSG00000278053	DExD-box helicase 52	NA
HVAEP1-G012819	asmbl_87443	0.376414	PRKAA2, PRKAA1	ENSG00000162409, ENSG00000132356	protein kinase AMP-activated catalytic subunit alpha 1, protein kinase AMP-activated catalytic subunit alpha 2	NA
HVAEP1-G026403	asmbl_9513	0.376102	NA	NA	NA	NA
HVAEP1-G016914	asmbl_85400	0.376073	CCDC85C, CCDC85B, CCDC85A	ENSG00000205476, ENSG00000175602, ENSG00000055813	coiled-coil domain containing 85C, coiled-coil domain containing 85A, coiled-coil domain containing 85B	NA
HVAEP1-G005884	asmbl_30370	0.376039	APEX1	ENSG00000100823	apurinic/apyrimidinic endodeoxyribonuclease 1	KM659183.1; apurinic/apyrimidinic endonuclease 1 (APE1)
HVAEP1-G014064	asmbl_12046	0.376015	TP53BP1	ENSG00000067369	tumor protein p53 binding protein 1	NA
HVAEP1-G014722	asmbl_64907	0.375985	FOXJ1	ENSG00000129654	forkhead box J1	NA
HVAEP1-G023402	asmbl_79758	0.375803	DERA	ENSG00000023697	deoxyribose-phosphate aldolase	NA
HVAEP1-G007050	asmbl_25717	0.375658	SFPQ, NONO, PSPC1	ENSG00000116560, ENSG00000147140, ENSG00000121390	paraspeckle component 1, non-POU domain containing octamer binding, splicing factor proline and glutamine rich	NA
HVAEP1-G023560	asmbl_11308	0.375646	hlh-14, hlh-4	WBGene00001958, WBGene00001951	Helix-loop-helix protein 4, Helix Loop Helix	NA
HVAEP1-G017172	asmbl_48229	0.375553	NA	NA	NA	NA
HVAEP1-G027181	asmbl_39094	0.375532	NA	NA	NA	NA
HVAEP1-G003932	asmbl_19460	0.37552	NA	NA	NA	NA
HVAEP1-G025756	asmbl_53256	0.375481	MSH3	ENSG00000113318	mutS homolog 3	NA
HVAEP1-G011619	asmbl_10898	0.375283	EIF5A2, EIF5AL1, EIF5A, EIF5A	ENSG00000163577, ENSG00000253626, ENSG00000288145, ENSG00000132507	eukaryotic translation initiation factor 5A, eukaryotic translation initiation factor 5A like 1, eukaryotic translation initiation factor 5A2	NA
HVAEP1-G020166	asmbl_78607	0.375261	SLC32A1	ENSG00000101438	solute carrier family 32 member 1	NA
HVAEP1-G019250	CLYHEMG006548	0.375204	CHCHD2, CHCHD10, CHCHD10	ENSG00000106153, ENSG00000273607, ENSG00000250479	coiled-coil-helix-coiled-coil-helix domain containing 10, coiled-coil-helix-coiled-coil-helix domain containing 2	NA
HVAEP1-G011091	asmbl_53646	0.375097	PSTK	ENSG00000179988	phosphoseryl-tRNA kinase	NA
HVAEP1-G022821	asmbl_73743	0.374876	FTSJ1	ENSG00000068438	FtsJ RNA 2'-O-methyltransferase 1	NA
HVAEP1-G020121	asmbl_58976	0.374722	TRNT1	ENSG00000072756	tRNA nucleotidyl transferase 1	NA
HVAEP1-G008263	asmbl_14112	0.374673	NOP14	ENSG00000087269	NOP14 nucleolar protein	NA
HVAEP1-G001489	asmbl_43892	0.373936	RNF13, ZNRF4, RNF167	ENSG00000082996, ENSG00000105428, ENSG00000108523	zinc and ring finger 4, ring finger protein 167, ring finger protein 13	NA
HVAEP1-G016736	asmbl_43603	0.37381	PSMD8	ENSG00000099341	proteasome 26S subunit, non-ATPase 8	NA
HVAEP1-G020810	asmbl_88241	0.373468	NA	NA	NA	NA
HVAEP1-G017100	CLYHEMG009127	0.373203	YIPF4	ENSG00000119820	Yip1 domain family member 4	NA
HVAEP1-G017543	asmbl_62090	0.373167	TM7SF2, LBR	ENSG00000149809, ENSG00000143815	transmembrane 7 superfamily member 2, lamin B receptor	NA
HVAEP1-G011493	CLYHEMG001403	0.373166	CAPZB	ENSG00000077549	capping actin protein of muscle Z-line subunit beta	NA
HVAEP1-G005214	asmbl_17955	0.373139	NA	NA	NA	NA
HVAEP1-G012787	asmbl_82809	0.372936	ORC1	ENSG00000085840	origin recognition complex subunit 1	NA
HVAEP1-G025664	asmbl_72732	0.372287	NA	NA	NA	NA
HVAEP1-G019806	asmbl_45092	0.372284	NA	NA	NA	NA
HVAEP1-G001169	asmbl_15345	0.372263	PAK2, PAK3, PAK1	ENSG00000180370, ENSG00000077264, ENSG00000149269	p21 (RAC1) activated kinase 3, p21 (RAC1) activated kinase 1, p21 (RAC1) activated kinase 2	NA
HVAEP1-G023307	CLYHEMG005250	0.372049	SLX1B, SLX1A	ENSG00000181625, ENSG00000132207	SLX1 homolog A, structure-specific endonuclease subunit, SLX1 homolog B, structure-specific endonuclease subunit	NA
HVAEP1-G003640	asmbl_49318	0.371751	Tsp74F	FBgn0036769	NA	NA
HVAEP1-G006906	asmbl_42222	0.371709	CLIC1, CLIC1, CLIC1, CLIC1, CLIC1, CLIC1, CLIC1, CLIC3, CLIC4, CLIC5, CLIC2, CLIC6	ENSG00000223639, ENSG00000226417, ENSG00000226248, ENSG00000226651, ENSG00000230685, ENSG00000206394, ENSG00000213719, ENSG00000169583, ENSG00000169504, ENSG00000112782, ENSG00000155962, ENSG00000159212	chloride intracellular channel 1, chloride intracellular channel 6, chloride intracellular channel 2, chloride intracellular channel 5, chloride intracellular channel 3, chloride intracellular channel 4	NA
HVAEP1-G014159	asmbl_64915	0.371144	TMEM184A, TMEM184B	ENSG00000164855, ENSG00000198792	transmembrane protein 184B, transmembrane protein 184A	NA
HVAEP1-G001822	CLYHEMG010317	0.370999	NA	NA	NA	NA
HVAEP1-G023783	asmbl_81930	0.370877	PFDN6, PFDN6, PFDN6, PFDN6, PFDN6	ENSG00000224782, ENSG00000235692, ENSG00000206283, ENSG00000237335, ENSG00000204220	prefoldin subunit 6	NA
HVAEP1-G015334	asmbl_79803	0.370589	BIRC5	ENSG00000089685	baculoviral IAP repeat containing 5	NA
HVAEP1-G004599	asmbl_86286	0.37049	NA	NA	NA	NA
HVAEP1-G013005	asmbl_19655	0.370465	atf-2	WBGene00000220	ATF (cAMP-dependent transcription factor) family	NA
HVAEP1-G001996	asmbl_73535	0.370419	mys, Itgbn	FBgn0004657, FBgn0010395	NA	NA
HVAEP1-G006672	asmbl_38127	0.370373	XPNPEP1	ENSG00000108039	X-prolyl aminopeptidase 1	NA
HVAEP1-G014395	asmbl_32523	0.370188	IFT27	ENSG00000100360	intraflagellar transport 27	NA
HVAEP1-G013430	asmbl_25495	0.370069	HABP4, SERBP1	ENSG00000130956, ENSG00000142864	hyaluronan binding protein 4, SERPINE1 mRNA binding protein 1	DQ286053.1; unknown
HVAEP1-G008047	asmbl_21763	0.370061	ZnT63C	FBgn0035432	NA	NA
HVAEP1-G011197	asmbl_29427	0.369603	PRIM1	ENSG00000198056	DNA primase subunit 1	NA
HVAEP1-G028646	asmbl_32362	0.369294	DPM1	ENSG00000000419	dolichyl-phosphate mannosyltransferase subunit 1, catalytic	NA
HVAEP1-G016962	asmbl_16247	0.368814	FERMT2, FERMT3, FERMT1	ENSG00000073712, ENSG00000149781, ENSG00000101311	fermitin family member 1, fermitin family member 2, fermitin family member 3	NA
HVAEP1-G024116	CLYHEMG011515	0.368807	TRIP13	ENSG00000071539	thyroid hormone receptor interactor 13	NA
HVAEP1-G016699	asmbl_48296	0.368636	NA	NA	NA	NA
HVAEP1-G006260	asmbl_30241	0.368447	ZCCHC7	ENSG00000147905	zinc finger CCHC-type containing 7	NA
HVAEP1-G027707	asmbl_85872	0.368425	CIAPIN1	ENSG00000005194	cytokine induced apoptosis inhibitor 1	NA
HVAEP1-G019840	asmbl_67439	0.368243	NA	NA	NA	NA
HVAEP1-G006921	asmbl_12855	0.367889	NA	NA	NA	NA
HVAEP1-G005763	asmbl_32915	0.367818	POP1	ENSG00000104356	POP1 homolog, ribonuclease P/MRP subunit	NA
HVAEP1-G022082	asmbl_43468	0.36781	RPL10A	ENSG00000198755	ribosomal protein L10a	NA
HVAEP1-G014790	asmbl_56135	0.367799	ACO2	ENSG00000100412	aconitase 2	NA
HVAEP1-G022166	asmbl_47815	0.366983	NA	NA	NA	NA
HVAEP1-G017790	asmbl_41330	0.366981	NOL10	ENSG00000115761	nucleolar protein 10	NA
HVAEP1-G026622	asmbl_1734	0.366803	BCAP29, BCAP29, BCAP31	ENSG00000283852, ENSG00000075790, ENSG00000185825	B cell receptor associated protein 29, B cell receptor associated protein 31	NA
HVAEP1-G017434	asmbl_16266	0.366785	PNO1	ENSG00000115946	partner of NOB1 homolog	NA
HVAEP1-G025955	asmbl_47258	0.366648	RFX1, RFX1, RFX3, RFX2	ENSG00000288283, ENSG00000132005, ENSG00000080298, ENSG00000087903	regulatory factor X1, regulatory factor X3, regulatory factor X2	NA
HVAEP1-G024595	asmbl_61574	0.366377	OSTF1	ENSG00000134996	osteoclast stimulating factor 1	NA
HVAEP1-G006149	asmbl_5109	0.365816	PAAF1	ENSG00000175575	proteasomal ATPase associated factor 1	NA
HVAEP1-G010842	asmbl_33768	0.365776	CCNL1, CCNL2	ENSG00000163660, ENSG00000221978	cyclin L2, cyclin L1	NA
HVAEP1-G004345	asmbl_24523	0.365695	NA	NA	NA	NA
HVAEP1-G009211	asmbl_88917	0.365357	SF3B4	ENSG00000143368	splicing factor 3b subunit 4	NA
HVAEP1-G009961	asmbl_43205	0.365226	GBE1	ENSG00000114480	1,4-alpha-glucan branching enzyme 1	NA
HVAEP1-G009444	asmbl_47019	0.3651	NCDN	ENSG00000020129	neurochondrin	NA
HVAEP1-G009988	asmbl_10154	0.365038	NA	NA	NA	NA
HVAEP1-G024515	asmbl_61582	0.364967	PSMA4	ENSG00000041357	proteasome 20S subunit alpha 4	NA
HVAEP1-G010898	asmbl_35553	0.364911	NA	NA	NA	NA
HVAEP1-G024774	CLYHEMG019430	0.36478	klp-17, klp-15, klp-16	WBGene00002227, WBGene00002225, WBGene00002226	Kinesin-like protein	NA
HVAEP1-G026587	asmbl_14697	0.364761	SUCLG2	ENSG00000172340	succinate-CoA ligase GDP-forming subunit beta	NA
HVAEP1-G021302	asmbl_9580	0.364599	C11orf16	ENSG00000176029	chromosome 11 open reading frame 16	NA
HVAEP1-G004866	asmbl_42395	0.364564	NA	NA	NA	NA
HVAEP1-G002598	asmbl_1119	0.364229	RANBP6, IPO5	ENSG00000137040, ENSG00000065150	importin 5, RAN binding protein 6	NA
HVAEP1-G010906	asmbl_86960	0.36406	NA	NA	NA	NA
HVAEP1-G028476	asmbl_91254	0.363809	NDUFAF5	ENSG00000101247	NADH:ubiquinone oxidoreductase complex assembly factor 5	NA
HVAEP1-G011330	asmbl_56254	0.363764	RPL11	ENSG00000142676	ribosomal protein L11	NA
HVAEP1-G002328	asmbl_41131	0.363659	SRY	ENSG00000184895	sex determining region Y	NA
HVAEP1-G014707	asmbl_1648	0.363451	NA	NA	NA	NA
HVAEP1-G012294	CLYHEMG011992	0.363402	OLA1	ENSG00000138430	Obg like ATPase 1	NA
HVAEP1-G005084	CLYHEMG018939	0.363368	CFAP58	ENSG00000120051	cilia and flagella associated protein 58	NA
HVAEP1-G008981	asmbl_54701	0.363159	BOLA1	ENSG00000178096	bolA family member 1	NA
HVAEP1-G017552	asmbl_26801	0.362903	LTV1	ENSG00000135521	LTV1 ribosome biogenesis factor	NA
HVAEP1-G013842	asmbl_82771	0.36264	CRLF3	ENSG00000176390	cytokine receptor like factor 3	NA
HVAEP1-G022965	asmbl_69660	0.362271	ACACA, ACACA, ACACB	ENSG00000275176, ENSG00000278540, ENSG00000076555	acetyl-CoA carboxylase alpha, acetyl-CoA carboxylase beta	NA
HVAEP1-G011636	asmbl_29430	0.362083	GOLIM4	ENSG00000173905	golgi integral membrane protein 4	NA
HVAEP1-G013738	asmbl_38815	0.362066	SDF2L1, SDF2	ENSG00000128228, ENSG00000132581	stromal cell derived factor 2 like 1, stromal cell derived factor 2	NA
HVAEP1-G010631	asmbl_57233	0.362054	CG33490, CG32086, CG33489	FBgn0053490, FBgn0052086, FBgn0053489	NA	NA
HVAEP1-G016122	asmbl_75744	0.361973	NA	NA	NA	NA
HVAEP1-G006963	asmbl_14295	0.361793	ptp-2	WBGene00004214	Tyrosine-protein phosphatase non-receptor type ptp-2	NA
HVAEP1-G013223	asmbl_25624	0.361685	NA	NA	NA	NA
HVAEP1-G017027	asmbl_21942	0.36159	Brf	FBgn0038499	NA	NA
HVAEP1-G017550	asmbl_52251	0.361253	ELAC1	ENSG00000141642	elaC ribonuclease Z 1	NA
HVAEP1-G009466	asmbl_53733	0.360894	IBTK, IBTK	ENSG00000283068, ENSG00000005700	inhibitor of Bruton tyrosine kinase	NA
HVAEP1-G024753	asmbl_61602	0.36084	LSG1	ENSG00000041802	large 60S subunit nuclear export GTPase 1	NA
HVAEP1-G020968	asmbl_23878	0.360772	SLC29A2, SLC29A1	ENSG00000174669, ENSG00000112759	solute carrier family 29 member 1 (Augustine blood group), solute carrier family 29 member 2	NA
HVAEP1-G023097	asmbl_86722	0.360771	TMEM214	ENSG00000119777	transmembrane protein 214	NA
HVAEP1-G002169	asmbl_73139	0.360738	NA	NA	NA	NA
HVAEP1-G011400	asmbl_15068	0.360736	USP48	ENSG00000090686	ubiquitin specific peptidase 48	NA
HVAEP1-G003774	asmbl_14653	0.360701	FBXL18	ENSG00000155034	F-box and leucine rich repeat protein 18	NA
HVAEP1-G009414	asmbl_56467	0.360455	BCCIP	ENSG00000107949	BRCA2 and CDKN1A interacting protein	NA
HVAEP1-G023287	asmbl_79187	0.360378	HIRIP3	ENSG00000149929	HIRA interacting protein 3	NA
HVAEP1-G011847	asmbl_14964	0.360241	CHD5, CHD4, CHD3	ENSG00000116254, ENSG00000111642, ENSG00000170004	chromodomain helicase DNA binding protein 4, chromodomain helicase DNA binding protein 5, chromodomain helicase DNA binding protein 3	NA
HVAEP1-G023577	asmbl_69692	0.360121	VDAC3, VDAC2, VDAC1	ENSG00000078668, ENSG00000165637, ENSG00000213585	voltage dependent anion channel 3, voltage dependent anion channel 2, voltage dependent anion channel 1	NA
HVAEP1-G019897	asmbl_61689	0.359814	NA	NA	NA	NA
HVAEP1-G023296	asmbl_73671	0.359783	XBP1	ENSG00000100219	X-box binding protein 1	NA
HVAEP1-G002126	asmbl_53446	0.35942	NA	NA	NA	NA
HVAEP1-G017303	asmbl_90466	0.359367	Rho1	FBgn0014020	NA	NA
HVAEP1-G028521	asmbl_42818	0.359135	C8orf82	ENSG00000213563	chromosome 8 open reading frame 82	NA
HVAEP1-G027962	asmbl_62670	0.358646	CCDC113	ENSG00000103021	coiled-coil domain containing 113	NA
HVAEP1-G008251	asmbl_70289	0.358588	RPLP1	ENSG00000137818	ribosomal protein lateral stalk subunit P1	NA
HVAEP1-G005845	asmbl_46781	0.358505	Snx3	FBgn0038065	NA	NA
HVAEP1-G003678	asmbl_13142	0.358437	RPL27A	ENSG00000166441	ribosomal protein L27a	NA
HVAEP1-G022628	asmbl_73959	0.358231	RPL9	ENSG00000163682	ribosomal protein L9	NA
HVAEP1-G020170	asmbl_68333	0.35816	MED10	ENSG00000133398	mediator complex subunit 10	NA
HVAEP1-G027218	asmbl_90164	0.358088	CHCHD1	ENSG00000172586	coiled-coil-helix-coiled-coil-helix domain containing 1	NA
HVAEP1-G022177	asmbl_36077	0.357949	RAB28	ENSG00000157869	RAB28, member RAS oncogene family	NA
HVAEP1-G028000	asmbl_80180	0.357804	GINS2	ENSG00000131153	GINS complex subunit 2	NA
HVAEP1-G008611	CLYHEMG010704	0.357749	NA	NA	NA	NA
HVAEP1-G001889	CLYHEMG017484	0.357551	LAMTOR4	ENSG00000188186	late endosomal/lysosomal adaptor, MAPK and MTOR activator 4	NA
HVAEP1-G017228	asmbl_16244	0.357242	CLSPN	ENSG00000092853	claspin	Y11678.1; neuropeptide precursor, 558bp
HVAEP1-G008908	asmbl_88655	0.356921	CNST	ENSG00000162852	consortin, connexin sorting protein	NA
HVAEP1-G017189	asmbl_78320	0.35688	NA	NA	NA	NA
HVAEP1-G006234	asmbl_29057	0.356732	TIPRL	ENSG00000143155	TOR signaling pathway regulator	NA
HVAEP1-G016148	asmbl_44270	0.356669	NA	NA	NA	NA
HVAEP1-G028100	asmbl_20824	0.355689	ACIN1	ENSG00000100813	apoptotic chromatin condensation inducer 1	NA
HVAEP1-G018417	asmbl_37698	0.355688	MMAB	ENSG00000139428	metabolism of cobalamin associated B	NA
HVAEP1-G023743	asmbl_84781	0.355612	HPCAL1, HPCA, NCALD	ENSG00000115756, ENSG00000121905, ENSG00000104490	neurocalcin delta, hippocalcin like 1, hippocalcin	NA
HVAEP1-G015882	asmbl_77246	0.355385	FCF1	ENSG00000119616	FCF1 rRNA-processing protein	NA
HVAEP1-G012844	asmbl_5683	0.355235	CG9801	FBgn0037623	NA	NA
HVAEP1-G028254	asmbl_91409	0.355208	KIF15, KIF15	ENSG00000280610, ENSG00000163808	kinesin family member 15	NA
HVAEP1-G006131	asmbl_4208	0.355158	WDR54	ENSG00000005448	WD repeat domain 54	NA
HVAEP1-G024963	asmbl_79460	0.355105	NA	NA	NA	NA
HVAEP1-G018928	asmbl_12723	0.354883	PRR11	ENSG00000068489	proline rich 11	NA
HVAEP1-G014678	asmbl_18514	0.354841	IFI30	ENSG00000216490	IFI30 lysosomal thiol reductase	NA
HVAEP1-G001122	CLYHEMG011920	0.354687	TMEM147	ENSG00000105677	transmembrane protein 147	NA
HVAEP1-G027488	CLYHEMG025275	0.354597	COX4I1, COX4I2	ENSG00000131143, ENSG00000131055	cytochrome c oxidase subunit 4I2, cytochrome c oxidase subunit 4I1	NA
HVAEP1-G023144	asmbl_36279	0.354553	RPS12	ENSG00000112306	ribosomal protein S12	NA
HVAEP1-G020870	asmbl_44459	0.354343	NA	NA	NA	NA
HVAEP1-G022055	asmbl_67953	0.35422	MCTS2P, MCTS1, MCTS1	ENSG00000101898, ENSG00000288295, ENSG00000232119	MCTS1 re-initiation and release factor,	NA
HVAEP1-G019822	asmbl_15550	0.354126	ZNF622	ENSG00000173545	zinc finger protein 622	NA
HVAEP1-G006849	asmbl_22206	0.353879	DHDDS	ENSG00000117682	dehydrodolichyl diphosphate synthase subunit	NA
HVAEP1-G004186	asmbl_24464	0.353811	TTC23L, TTC23	ENSG00000205838, ENSG00000103852	tetratricopeptide repeat domain 23 like, tetratricopeptide repeat domain 23	NA
HVAEP1-G006391	asmbl_62146	0.353809	PNISR	ENSG00000132424	PNN interacting serine and arginine rich protein	NA
HVAEP1-G014153	asmbl_4438	0.353754	LLGL1, LLGL1, LLGL2	ENSG00000284137, ENSG00000131899, ENSG00000073350	LLGL scribble cell polarity complex component 1, LLGL scribble cell polarity complex component 2	NA
HVAEP1-G020159	asmbl_64088	0.353696	NA	NA	NA	NA
HVAEP1-G003571	asmbl_30505	0.353569	CCDC105	ENSG00000160994	coiled-coil domain containing 105	NA
HVAEP1-G023400	asmbl_73747	0.353522	NA	NA	NA	NA
HVAEP1-G018509	CLYHEMG024602	0.353353	SPATA22	ENSG00000141255	spermatogenesis associated 22	NA
HVAEP1-G009542	asmbl_32087	0.353134	NA	NA	NA	NA
HVAEP1-G020873	asmbl_80104	0.353056	NA	NA	NA	NA
HVAEP1-G012180	asmbl_48814	0.352734	SKIL, SKI	ENSG00000136603, ENSG00000157933	SKI proto-oncogene, SKI like proto-oncogene	NA
HVAEP1-G020659	asmbl_78357	0.352492	TMEM106A, TMEM106C, TMEM106B	ENSG00000184988, ENSG00000134291, ENSG00000106460	transmembrane protein 106B, transmembrane protein 106C, transmembrane protein 106A	NA
HVAEP1-G010342	asmbl_46056	0.352277	RPS14	ENSG00000164587	ribosomal protein S14	NA
HVAEP1-G023694	asmbl_31212	0.352171	PR-Set7	FBgn0011474	NA	NA
HVAEP1-G006981	asmbl_31058	0.352137	TMEM128	ENSG00000132406	transmembrane protein 128	NA
HVAEP1-G024803	CLYHEMG018250	0.351931	FRMD5, FRMD3	ENSG00000171877, ENSG00000172159	FERM domain containing 3, FERM domain containing 5	NA
HVAEP1-G006046	asmbl_42305	0.351892	RSPH3	ENSG00000130363	radial spoke head 3	NA
HVAEP1-G019837	asmbl_7817	0.35185	ATF1, CREB1, CREM	ENSG00000123268, ENSG00000118260, ENSG00000095794	cAMP responsive element modulator, activating transcription factor 1, cAMP responsive element binding protein 1	X83872.1; cAMP response element binding protein
HVAEP1-G009682	asmbl_70119	0.35158	PIWIL2	ENSG00000197181	piwi like RNA-mediated gene silencing 2	KF411462.1; Hyli
HVAEP1-G013753	asmbl_78187	0.351511	NA	NA	NA	NA
HVAEP1-G021083	asmbl_82960	0.351358	NA	NA	NA	NA
HVAEP1-G006002	asmbl_47442	0.351023	PITRM1	ENSG00000107959	pitrilysin metallopeptidase 1	NA
HVAEP1-G004849	asmbl_88458	0.351015	MRPL9	ENSG00000143436	mitochondrial ribosomal protein L9	NA
HVAEP1-G017422	asmbl_48588	0.351007	SPRTN	ENSG00000010072	SprT-like N-terminal domain	NA
HVAEP1-G004614	asmbl_30071	0.350558	ODAD3	ENSG00000198003	outer dynein arm docking complex subunit 3	NA
HVAEP1-G027359	asmbl_62675	0.350409	FOXC1, FOXC2	ENSG00000054598, ENSG00000176692	forkhead box C1, forkhead box C2	JQ994211.1; transcription factor FoxA2
HVAEP1-G011814	asmbl_2547	0.350304	NA	NA	NA	NA
HVAEP1-G006276	asmbl_80068	0.350005	TCEANC2	ENSG00000116205	transcription elongation factor A N-terminal and central domain containing 2	NA
HVAEP1-G020393	asmbl_16996	0.349985	RBM33	ENSG00000184863	RNA binding motif protein 33	NA
HVAEP1-G008174	asmbl_31949	0.349965	RPL34	ENSG00000109475	ribosomal protein L34	NA
HVAEP1-G024215	asmbl_37296	0.34996	DAP3	ENSG00000132676	death associated protein 3	NA
HVAEP1-G022289	asmbl_43481	0.349738	CORO7-PAM16, CORO7-PAM16, CORO7, CORO7	ENSG00000278760, ENSG00000103426, ENSG00000282725, ENSG00000262246	CORO7-PAM16 readthrough, coronin 7	NA
HVAEP1-G017041	asmbl_69005	0.349728	CDIN1	ENSG00000186073	CDAN1 interacting nuclease 1	NA
HVAEP1-G002007	asmbl_54083	0.349237	GSK3B, GSK3A	ENSG00000082701, ENSG00000105723	glycogen synthase kinase 3 alpha, glycogen synthase kinase 3 beta	AF272672.1; serine/threonine kinase GSK3
HVAEP1-G005274	asmbl_22255	0.348989	NDUFAF3	ENSG00000178057	NADH:ubiquinone oxidoreductase complex assembly factor 3	NA
HVAEP1-G013531	asmbl_70543	0.348877	INTS7	ENSG00000143493	integrator complex subunit 7	NA
HVAEP1-G001412	asmbl_23029	0.348653	AP1S2, AP1S1, AP1S3	ENSG00000182287, ENSG00000106367, ENSG00000152056	adaptor related protein complex 1 subunit sigma 2, adaptor related protein complex 1 subunit sigma 1, adaptor related protein complex 1 subunit sigma 3	NA
HVAEP1-G018497	asmbl_12024	0.348642	RPAIN	ENSG00000129197	RPA interacting protein	NA
HVAEP1-G019991	asmbl_45361	0.348559	PSMA2	ENSG00000106588	proteasome 20S subunit alpha 2	NA
HVAEP1-G019043	asmbl_30987	0.348053	GNBP-like3, GNBP3, CG30148, GNBP2, GNBP1	FBgn0034511, FBgn0040321, FBgn0050148, FBgn0040322, FBgn0040323	NA	NA
HVAEP1-G018016	asmbl_8588	0.348004	TMED2	ENSG00000086598	transmembrane p24 trafficking protein 2	NA
HVAEP1-G021144	asmbl_55719	0.347899	COPS4	ENSG00000138663	COP9 signalosome subunit 4	NA
HVAEP1-G027641	asmbl_91341	0.347751	PARD6G, PARD6B, PARD6A	ENSG00000178184, ENSG00000124171, ENSG00000102981	par-6 family cell polarity regulator beta, par-6 family cell polarity regulator gamma, par-6 family cell polarity regulator alpha	NA
HVAEP1-G028195	asmbl_12351	0.347739	IPO4, IPO4	ENSG00000285248, ENSG00000196497	importin 4	NA
HVAEP1-G012542	asmbl_4684	0.347625	TMEM186	ENSG00000184857	transmembrane protein 186	NA
HVAEP1-G017830	asmbl_71941	0.347602	NA	NA	NA	NA
HVAEP1-G026353	asmbl_34559	0.347375	DMTF1	ENSG00000135164	cyclin D binding myb like transcription factor 1	NA
HVAEP1-G005826	asmbl_85728	0.347364	DHX34	ENSG00000134815	DExH-box helicase 34	NA
HVAEP1-G005346	CLYHEMG023039	0.347091	ZRANB1	ENSG00000019995	zinc finger RANBP2-type containing 1	NA
HVAEP1-G022862	asmbl_31034	0.347082	UBN1, UBN2	ENSG00000118900, ENSG00000157741	ubinuclein 1, ubinuclein 2	NA
HVAEP1-G006472	CLYHEMG000867	0.347029	PGM3	ENSG00000013375	phosphoglucomutase 3	NA
HVAEP1-G004505	asmbl_68870	0.346993	NOS1AP	ENSG00000198929	nitric oxide synthase 1 adaptor protein	NA
HVAEP1-G004099	asmbl_68890	0.346761	AMZ2, AMZ1	ENSG00000196704, ENSG00000174945	archaelysin family metallopeptidase 1, archaelysin family metallopeptidase 2	NA
HVAEP1-G016347	asmbl_90448	0.346618	PPP1CB	ENSG00000213639	protein phosphatase 1 catalytic subunit beta	NA
HVAEP1-G022459	asmbl_19192	0.346582	IK	ENSG00000113141	IK cytokine	NA
HVAEP1-G019300	asmbl_44335	0.3465	POLDIP2	ENSG00000004142	DNA polymerase delta interacting protein 2	NA
HVAEP1-G024170	asmbl_51532	0.346414	CHTF8	ENSG00000168802	chromosome transmission fidelity factor 8, DERPC proline and glycine rich nuclear protein	NA
HVAEP1-G020660	asmbl_17348	0.346351	PSMC5	ENSG00000087191	proteasome 26S subunit, ATPase 5	NA
HVAEP1-G027680	asmbl_90098	0.345995	HEATR3	ENSG00000155393	HEAT repeat containing 3	NA
HVAEP1-G006108	asmbl_55371	0.345926	NUS1	ENSG00000153989	NUS1 dehydrodolichyl diphosphate synthase subunit	NA
HVAEP1-G017102	asmbl_7725	0.345882	MRPL35	ENSG00000132313	mitochondrial ribosomal protein L35	NA
HVAEP1-G011692	asmbl_29047	0.345579	KIF26B, KIF26B, KIF26A	ENSG00000281216, ENSG00000162849, ENSG00000066735	kinesin family member 26B, kinesin family member 26A	NA
HVAEP1-G009513	asmbl_38262	0.345458	NA	NA	NA	NA
HVAEP1-G027007	asmbl_21035	0.345124	KCND1, KCND2, KCND3	ENSG00000102057, ENSG00000184408, ENSG00000171385	potassium voltage-gated channel subfamily D member 1, potassium voltage-gated channel subfamily D member 2, potassium voltage-gated channel subfamily D member 3	NA
HVAEP1-G010378	asmbl_34398	0.344923	fos-1	WBGene00001345	Transcription factor fos-1	NA
HVAEP1-G003190	asmbl_13163	0.344896	RPS18, RPS18, RPS18, RPS18, RPS18	ENSG00000223367, ENSG00000226225, ENSG00000096150, ENSG00000235650, ENSG00000231500	ribosomal protein S18	NA
HVAEP1-G016606	asmbl_21973	0.344737	PSMB4	ENSG00000159377	proteasome 20S subunit beta 4	NA
HVAEP1-G002669	asmbl_18206	0.344631	NA	NA	NA	NA
HVAEP1-G018071	asmbl_79283	0.343867	ARMC5	ENSG00000140691	armadillo repeat containing 5	NA
HVAEP1-G027355	asmbl_12343	0.343515	NA	NA	NA	NA
HVAEP1-G024502	asmbl_5744	0.343357	NA	NA	NA	EF104647.1; bcl-2
HVAEP1-G027382	asmbl_34793	0.3433	MRPS15	ENSG00000116898	mitochondrial ribosomal protein S15	NA
HVAEP1-G006782	asmbl_81804	0.343278	POLR2B	ENSG00000047315	RNA polymerase II subunit B	NA
HVAEP1-G016376	asmbl_44263	0.343089	YJU2	ENSG00000105248	YJU2 splicing factor homolog	NA
HVAEP1-G005897	asmbl_30406	0.342751	SHTN1	ENSG00000187164	shootin 1	NA
HVAEP1-G019934	asmbl_15562	0.34274	ARPP21, R3HDM2, R3HDM1	ENSG00000172995, ENSG00000179912, ENSG00000048991	cAMP regulated phosphoprotein 21, R3H domain containing 2, R3H domain containing 1	NA
HVAEP1-G002513	asmbl_43731	0.342373	DPP7	ENSG00000176978	dipeptidyl peptidase 7	NA
HVAEP1-G027427	asmbl_42668	0.342276	WRNIP1	ENSG00000124535	WRN helicase interacting protein 1	NA
HVAEP1-G022122	asmbl_43449	0.342149	COQ2	ENSG00000173085	coenzyme Q2, polyprenyltransferase	NA
HVAEP1-G008145	asmbl_8841	0.341778	HMGCLL1, HMGCL	ENSG00000146151, ENSG00000117305	3-hydroxymethyl-3-methylglutaryl-CoA lyase like 1, 3-hydroxy-3-methylglutaryl-CoA lyase	NA
HVAEP1-G010677	asmbl_75060	0.341631	CWC25, CWC25	ENSG00000276761, ENSG00000273559	CWC25 spliceosome associated protein homolog	NA
HVAEP1-G009168	asmbl_66553	0.341371	PHYKPL, ETNPPL	ENSG00000175309, ENSG00000164089	ethanolamine-phosphate phospho-lyase, 5-phosphohydroxy-L-lysine phospho-lyase	NA
HVAEP1-G008372	asmbl_16435	0.341363	TDRD3	ENSG00000083544	tudor domain containing 3	NA
HVAEP1-G023286	asmbl_79183	0.341337	DOK7	ENSG00000175920	docking protein 7	NA
HVAEP1-G012487	CLYHEMG011147	0.341332	CEP41	ENSG00000106477	centrosomal protein 41	NA
HVAEP1-G023531	asmbl_30986	0.341204	NUP58	ENSG00000139496	nucleoporin 58	NA
HVAEP1-G017146	asmbl_52287	0.341135	CDC42SE2, CDC42SE1	ENSG00000158985, ENSG00000197622	CDC42 small effector 2, CDC42 small effector 1	NA
HVAEP1-G027489	asmbl_69632	0.340774	LRRCC1	ENSG00000133739	leucine rich repeat and coiled-coil centrosomal protein 1	NA
HVAEP1-G022664	asmbl_33965	0.340757	NA	NA	NA	NA
HVAEP1-G002438	asmbl_80269	0.340681	INTS4	ENSG00000149262	integrator complex subunit 4	NA
HVAEP1-G027241	asmbl_15681	0.340617	PSMB5, PSMB11, PSMB8, PSMB8, PSMB8, PSMB8, PSMB8, PSMB8, PSMB8, PSMB8	ENSG00000100804, ENSG00000222028, ENSG00000230669, ENSG00000236443, ENSG00000231631, ENSG00000226201, ENSG00000206298, ENSG00000235715, ENSG00000204264, ENSG00000230034	proteasome 20S subunit beta 8, proteasome 20S subunit beta 5, proteasome subunit beta 11	NA
HVAEP1-G026171	asmbl_29733	0.340556	PLD5, PLD3, PLD4	ENSG00000180287, ENSG00000105223, ENSG00000166428	phospholipase D family member 4, phospholipase D family member 3, phospholipase D family member 5	NA
HVAEP1-G017891	CLYHEMG024597	0.34053	GGT5, GGTLC3, GGT2, GGTLC1, GGT1, GGTLC2	ENSG00000099998, ENSG00000274252, ENSG00000133475, ENSG00000149435, ENSG00000100031, ENSG00000100121	gamma-glutamyltransferase 2, gamma-glutamyltransferase light chain family member 3, gamma-glutamyltransferase light chain 2, gamma-glutamyltransferase light chain 1, gamma-glutamyltransferase 1, gamma-glutamyltransferase 5	NA
HVAEP1-G002501	asmbl_15796	0.340253	UPF3A, UPF3B	ENSG00000169062, ENSG00000125351	UPF3A regulator of nonsense mediated mRNA decay, UPF3B regulator of nonsense mediated mRNA decay	NA
HVAEP1-G012064	asmbl_84418	0.34013	MRPL21	ENSG00000197345	mitochondrial ribosomal protein L21	NA
HVAEP1-G001157	asmbl_80248	0.339927	ATP5MGL, ATP5MG	ENSG00000249222, ENSG00000167283	ATP synthase membrane subunit g like, ATP synthase membrane subunit g	NA
HVAEP1-G023032	asmbl_31951	0.339799	NA	NA	NA	MH194569.2; VEGFR-2
HVAEP1-G028393	asmbl_82883	0.339248	UBE2C	ENSG00000175063	ubiquitin conjugating enzyme E2 C	NA
HVAEP1-G018451	asmbl_41529	0.338961	IFT22	ENSG00000128581	intraflagellar transport 22	NA
HVAEP1-G021735	CLYHEMG018496	0.338898	NA	NA	NA	NA
HVAEP1-G011131	asmbl_33793	0.338875	NA	NA	NA	NA
HVAEP1-G017021	asmbl_74739	0.33886	SCX, TCF15	ENSG00000260428, ENSG00000125878	transcription factor 15, scleraxis bHLH transcription factor	NA
HVAEP1-G012818	asmbl_18263	0.338822	TTC4	ENSG00000243725	tetratricopeptide repeat domain 4	NA
HVAEP1-G004923	asmbl_49413	0.338444	ZADH2	ENSG00000180011	zinc binding alcohol dehydrogenase domain containing 2	NA
HVAEP1-G014712	asmbl_82678	0.338426	RPL3L, RPL3	ENSG00000140986, ENSG00000100316	ribosomal protein L3, ribosomal protein L3 like	NA
HVAEP1-G024832	asmbl_77964	0.338076	TRMT13	ENSG00000122435	tRNA methyltransferase 13 homolog	NA
HVAEP1-G005329	asmbl_63352	0.337975	EXOSC3	ENSG00000107371	exosome component 3	NA
HVAEP1-G021525	asmbl_83045	0.337715	NA	NA	NA	NA
HVAEP1-G021671	asmbl_50751	0.337713	NA	NA	NA	NA
HVAEP1-G027186	asmbl_44002	0.337601	GEMIN2	ENSG00000092208	gem nuclear organelle associated protein 2	NA
HVAEP1-G016705	asmbl_62007	0.337572	NA	NA	NA	NA
HVAEP1-G013756	asmbl_24164	0.337315	GRB2	ENSG00000177885	growth factor receptor bound protein 2	NA
HVAEP1-G023810	asmbl_36092	0.3371	DAG1	ENSG00000173402	dystroglycan 1	NA
HVAEP1-G020729	asmbl_78355	0.336679	ATP6V1F	ENSG00000128524	ATPase H+ transporting V1 subunit F	NA
HVAEP1-G022186	asmbl_11229	0.336659	PCM1	ENSG00000078674	pericentriolar material 1	NA
HVAEP1-G007536	asmbl_157	0.336653	NA	NA	NA	NA
HVAEP1-G019173	asmbl_77119	0.336355	SETD1B, SETD1A	ENSG00000139718, ENSG00000099381	SET domain containing 1A, histone lysine methyltransferase, SET domain containing 1B, histone lysine methyltransferase	NA
HVAEP1-G022485	asmbl_85453	0.336185	INPP4B, INPP4A	ENSG00000109452, ENSG00000040933	inositol polyphosphate-4-phosphatase type II B, inositol polyphosphate-4-phosphatase type I A	NA
HVAEP1-G019041	CLYHEMG024056	0.336099	NA	NA	NA	NA
HVAEP1-G026955	asmbl_47848	0.336076	CBLL2, CBLL1	ENSG00000175809, ENSG00000105879	Cbl proto-oncogene like 2, Cbl proto-oncogene like 1	NA
HVAEP1-G021672	asmbl_76207	0.33595	PLK4	ENSG00000142731	polo like kinase 4	NA
HVAEP1-G001492	asmbl_15803	0.33577	EFHC2	ENSG00000183690	EF-hand domain containing 2	NA
HVAEP1-G025274	asmbl_57733	0.335596	NA	NA	NA	NA
HVAEP1-G024034	asmbl_67137	0.335594	MRPS35	ENSG00000061794	mitochondrial ribosomal protein S35	NA
HVAEP1-G017273	asmbl_52306	0.33549	TJP1, TJP1, TJP3, TJP2	ENSG00000277401, ENSG00000104067, ENSG00000105289, ENSG00000119139	tight junction protein 1, tight junction protein 3, tight junction protein 2	AF230482.1; tight junction protein ZO-1 (ZO-1)
HVAEP1-G019104	asmbl_37118	0.335456	H2AC1, H2AJ, H2AC20, H2AC18, H2AC19, H2AC6, H2AC14, H2AC12, H2AC7, H2AW, H2AW, H2AC4, H2AC8, H2AC11, H2AC13, H2AC15, H2AC16, H2AC17, H2AC21	ENSG00000164508, ENSG00000246705, ENSG00000184260, ENSG00000203812, ENSG00000272196, ENSG00000180573, ENSG00000276368, ENSG00000274997, ENSG00000196866, ENSG00000284841, ENSG00000181218, ENSG00000278463, ENSG00000277075, ENSG00000196787, ENSG00000196747, ENSG00000275221, ENSG00000276903, ENSG00000278677, ENSG00000184270	H2A.W histone, H2A clustered histone 11, H2A clustered histone 13, H2A clustered histone 14, H2A clustered histone 12, H2A clustered histone 1, H2A clustered histone 4, H2A clustered histone 15, H2A clustered histone 16, H2A clustered histone 17, H2A clustered histone 6, H2A clustered histone 7, H2A clustered histone 8, H2A.J histone, H2A clustered histone 18, H2A clustered histone 19, H2A cluste…	KY053287.1; strain Ind-Pune histone H2A.X.1
HVAEP1-G027393	asmbl_9036	0.335143	ERAL1	ENSG00000132591	Era like 12S mitochondrial rRNA chaperone 1	NA
HVAEP1-G004240	asmbl_41307	0.335063	TAF2	ENSG00000064313	TATA-box binding protein associated factor 2	NA
HVAEP1-G003766	asmbl_21271	0.334472	DNLZ	ENSG00000213221	DNL-type zinc finger	NA
HVAEP1-G011228	asmbl_29969	0.334464	ceh-37	WBGene00000458	Homeobox protein ceh-37	MH940209.1; homeobox transcription factor Otx1
HVAEP1-G024973	asmbl_46459	0.334446	HINT1	ENSG00000169567	histidine triad nucleotide binding protein 1	NA
HVAEP1-G005906	asmbl_50031	0.334291	ACOXL	ENSG00000153093	acyl-CoA oxidase like	NA
HVAEP1-G001065	asmbl_80244	0.334199	UBA52	ENSG00000221983	ubiquitin A-52 residue ribosomal protein fusion product 1	NA
HVAEP1-G009464	asmbl_2219	0.334014	WTAP	ENSG00000146457	WT1 associated protein	NA
HVAEP1-G023289	asmbl_79194	0.33364	ETFDH	ENSG00000171503	electron transfer flavoprotein dehydrogenase	NA
HVAEP1-G027401	asmbl_44060	0.33346	PIGT	ENSG00000124155	phosphatidylinositol glycan anchor biosynthesis class T	NA
HVAEP1-G006694	asmbl_16841	0.333375	C43H6.6	WBGene00016619	hypothetical protein	NA
HVAEP1-G020886	asmbl_13836	0.333375	TMEM106A, TMEM106C, TMEM106B	ENSG00000184988, ENSG00000134291, ENSG00000106460	transmembrane protein 106B, transmembrane protein 106C, transmembrane protein 106A	NA
HVAEP1-G009297	asmbl_25781	0.333314	D2HGDH	ENSG00000180902	D-2-hydroxyglutarate dehydrogenase	NA
HVAEP1-G006580	asmbl_60366	0.333147	TBC1D32	ENSG00000146350	TBC1 domain family member 32	NA
HVAEP1-G004546	asmbl_67061	0.332971	MGMT	ENSG00000170430	O-6-methylguanine-DNA methyltransferase	NA
HVAEP1-G024198	CLYHEMG009849	0.332946	RPRD1B, RPRD1A	ENSG00000101413, ENSG00000141425	regulation of nuclear pre-mRNA domain containing 1A, regulation of nuclear pre-mRNA domain containing 1B	NA
HVAEP1-G017589	asmbl_30833	0.332869	NA	NA	NA	NA
HVAEP1-G028562	asmbl_65466	0.332693	WDR88	ENSG00000166359	WD repeat domain 88	NA
HVAEP1-G015257	asmbl_71458	0.332232	TMEM11	ENSG00000178307	transmembrane protein 11	NA
HVAEP1-G010468	asmbl_57188	0.332216	RING1, RING1, RING1, RING1, RING1, RING1, RNF2	ENSG00000235107, ENSG00000228520, ENSG00000231115, ENSG00000206287, ENSG00000226788, ENSG00000204227, ENSG00000121481	ring finger protein 1, ring finger protein 2	NA
HVAEP1-G017256	asmbl_90000	0.332122	WDR25	ENSG00000176473	WD repeat domain 25	NA
HVAEP1-G019678	asmbl_44591	0.331986	CFAP221	ENSG00000163075	cilia and flagella associated protein 221	NA
HVAEP1-G027412	asmbl_65820	0.331795	ZDHHC1, ZDHHC11B, ZDHHC11	ENSG00000159714, ENSG00000206077, ENSG00000188818	zinc finger DHHC-type containing 11, zinc finger DHHC-type containing 11B, zinc finger DHHC-type containing 1	NA
HVAEP1-G018831	asmbl_77589	0.331582	CCDC25	ENSG00000147419	coiled-coil domain containing 25	NA
HVAEP1-G023607	asmbl_11256	0.331386	BSDC1	ENSG00000160058	BSD domain containing 1	NA
HVAEP1-G011657	asmbl_27163	0.33122	ATAD3A, ATAD3B, ATAD3C	ENSG00000197785, ENSG00000160072, ENSG00000215915	ATPase family AAA domain containing 3B, ATPase family AAA domain containing 3C, ATPase family AAA domain containing 3A	NA
HVAEP1-G011561	asmbl_36544	0.331065	LPCAT3	ENSG00000111684	lysophosphatidylcholine acyltransferase 3	NA
HVAEP1-G024429	asmbl_16593	0.330917	SUGP1, SUGP2	ENSG00000105705, ENSG00000064607	SURP and G-patch domain containing 1, SURP and G-patch domain containing 2	NA
HVAEP1-G003744	asmbl_33559	0.330871	RPL35	ENSG00000136942	ribosomal protein L35	NA
HVAEP1-G014910	asmbl_12130	0.330672	NA	NA	NA	NA
HVAEP1-G025517	asmbl_82554	0.330555	NA	NA	NA	NA
HVAEP1-G005883	asmbl_86174	0.33037	ZNF784	ENSG00000179922	zinc finger protein 784	NA
HVAEP1-G012877	asmbl_60550	0.330134	PIGM	ENSG00000143315	phosphatidylinositol glycan anchor biosynthesis class M	NA
HVAEP1-G001414	asmbl_80342	0.329951	ARHGEF12, ARHGEF1, ARHGEF11	ENSG00000196914, ENSG00000076928, ENSG00000132694	Rho guanine nucleotide exchange factor 1, uncharacterized LOC100505585, Rho guanine nucleotide exchange factor 11, Rho guanine nucleotide exchange factor 12	NA
HVAEP1-G004858	asmbl_24503	0.329836	CG3552	FBgn0035999	NA	NA
HVAEP1-G001880	asmbl_43746	0.329794	NA	NA	NA	NA
HVAEP1-G011555	asmbl_68633	0.329526	TAF5	ENSG00000148835	TATA-box binding protein associated factor 5	NA
HVAEP1-G023185	asmbl_11182	0.329517	FGF5, FGF6, FGF4, FGF3, FGF7, FGF22, FGF10, FGF9, FGF20, FGF16, FGF14, FGF12, FGF11, FGF11, FGF13	ENSG00000138675, ENSG00000111241, ENSG00000075388, ENSG00000186895, ENSG00000140285, ENSG00000070388, ENSG00000070193, ENSG00000102678, ENSG00000078579, ENSG00000196468, ENSG00000102466, ENSG00000114279, ENSG00000283903, ENSG00000161958, ENSG00000129682	fibroblast growth factor 9, fibroblast growth factor 11, fibroblast growth factor 14, fibroblast growth factor 22, fibroblast growth factor 20, fibroblast growth factor 7, fibroblast growth factor 6, fibroblast growth factor 13, fibroblast growth factor 10, fibroblast growth factor 5, fibroblast growth factor 16, fibroblast growth factor 4, fibroblast growth factor 12, fibroblast growth factor 3	NA
HVAEP1-G026228	asmbl_70547	0.329495	KDM4D, KDM4E, KDM4F, KDM4B, KDM4C, KDM4A	ENSG00000186280, ENSG00000235268, ENSG00000255855, ENSG00000127663, ENSG00000107077, ENSG00000066135	lysine demethylase 4B, lysine demethylase 4C, lysine demethylase 4A, lysine demethylase 4E, , lysine demethylase 4D	NA
HVAEP1-G011516	asmbl_10862	0.329447	SCO2, SCO1	ENSG00000284194, ENSG00000133028	synthesis of cytochrome C oxidase 2, synthesis of cytochrome C oxidase 1	NA
HVAEP1-G025913	asmbl_45789	0.329436	EMC1	ENSG00000127463	ER membrane protein complex subunit 1	NA
HVAEP1-G014653	asmbl_22706	0.329405	CYB5R3, CYB5R1, CYB5R2	ENSG00000100243, ENSG00000159348, ENSG00000166394	cytochrome b5 reductase 3, cytochrome b5 reductase 2, cytochrome b5 reductase 1	NA
HVAEP1-G007120	asmbl_30428	0.329311	NA	NA	NA	NA
HVAEP1-G022627	asmbl_9611	0.329013	TTC29	ENSG00000137473	tetratricopeptide repeat domain 29	NA
HVAEP1-G022178	asmbl_43574	0.328801	COPA	ENSG00000122218	COPI coat complex subunit alpha	NA
HVAEP1-G005764	asmbl_32897	0.328616	WDR18	ENSG00000065268	WD repeat domain 18	NA
HVAEP1-G022820	CLYHEMG005265	0.328294	AGK, AGK	ENSG00000262327, ENSG00000006530	acylglycerol kinase	NA
HVAEP1-G027313	asmbl_51593	0.328272	NA	NA	NA	AF307863.1; glyceraldehyde-3-phosphate dehydrogenase
HVAEP1-G024108	asmbl_69620	0.328136	Nhe1	FBgn0026787	NA	NA
HVAEP1-G023001	asmbl_16632	0.328125	ING2, ING1	ENSG00000168556, ENSG00000153487	inhibitor of growth family member 1, inhibitor of growth family member 2	NA
HVAEP1-G023618	asmbl_67151	0.328099	DKK4, DKK2, DKK1, DKK3	ENSG00000104371, ENSG00000155011, ENSG00000107984, ENSG00000050165	dickkopf WNT signaling pathway inhibitor 1, dickkopf WNT signaling pathway inhibitor 4, dickkopf WNT signaling pathway inhibitor 2, dickkopf WNT signaling pathway inhibitor 3	NA
HVAEP1-G010111	CLYHEMG023777	0.328077	NA	NA	NA	NA
HVAEP1-G001553	asmbl_1094	0.328028	BAG1	ENSG00000107262	BAG cochaperone 1	NA
HVAEP1-G016108	asmbl_89993	0.327918	PPP2R5D, PPP2R5C	ENSG00000112640, ENSG00000078304	protein phosphatase 2 regulatory subunit B'gamma, protein phosphatase 2 regulatory subunit B'delta	NA
HVAEP1-G013445	asmbl_8309	0.327811	PTBP1, PTBP3, PTBP2	ENSG00000011304, ENSG00000119314, ENSG00000117569	polypyrimidine tract binding protein 3, polypyrimidine tract binding protein 1, polypyrimidine tract binding protein 2	NA
HVAEP1-G001572	asmbl_51140	0.327721	ILVBL	ENSG00000105135	ilvB acetolactate synthase like	NA
HVAEP1-G005328	asmbl_50035	0.327617	SNAP91, PICALM	ENSG00000065609, ENSG00000073921	synaptosome associated protein 91, phosphatidylinositol binding clathrin assembly protein	NA
HVAEP1-G023529	nbis-gene-239	0.327354	NA	NA	NA	NA
HVAEP1-G007926	CLYHEMG008536	0.3273	CEP44	ENSG00000164118	centrosomal protein 44	NA
HVAEP1-G009594	asmbl_49648	0.327203	EPS8, EPS8L2, EPS8L1, EPS8L3	ENSG00000151491, ENSG00000177106, ENSG00000131037, ENSG00000198758	epidermal growth factor receptor pathway substrate 8, EPS8 like 2, EPS8 like 1, EPS8 like 3	NA
HVAEP1-G017425	asmbl_1016	0.32701	LCLAT1	ENSG00000172954	lysocardiolipin acyltransferase 1	NA
HVAEP1-G012644	asmbl_24231	0.326962	PSRC1, GTSE1	ENSG00000134222, ENSG00000075218	G2 and S-phase expressed 1, proline and serine rich coiled-coil 1	NA
HVAEP1-G013054	asmbl_91105	0.326814	ATP6V0B	ENSG00000117410	ATPase H+ transporting V0 subunit b	NA
HVAEP1-G028852	asmbl_62600	0.326795	DYNC1LI2, DYNC1LI1	ENSG00000135720, ENSG00000144635	dynein cytoplasmic 1 light intermediate chain 1, dynein cytoplasmic 1 light intermediate chain 2	NA
HVAEP1-G024728	asmbl_75239	0.326679	NA	NA	NA	NA
HVAEP1-G005145	asmbl_86263	0.326609	SH2D6, BLNK, LCP2, CLNK	ENSG00000152292, ENSG00000095585, ENSG00000043462, ENSG00000109684	cytokine dependent hematopoietic cell linker, B cell linker, SH2 domain containing 6, lymphocyte cytosolic protein 2	NA
HVAEP1-G027291	asmbl_71866	0.326545	EFS, BCAR1, BCAR1, NEDD9, CASS4	ENSG00000100842, ENSG00000285460, ENSG00000050820, ENSG00000111859, ENSG00000087589	BCAR1 scaffold protein, Cas family member, neural precursor cell expressed, developmentally down-regulated 9, embryonal Fyn-associated substrate, Cas scaffold protein family member 4	NA
HVAEP1-G008778	asmbl_275	0.326515	ADH5, ADH4, ADH7, ADH1C, ADH1B, ADH1A, ADH6	ENSG00000197894, ENSG00000198099, ENSG00000196344, ENSG00000248144, ENSG00000196616, ENSG00000187758, ENSG00000172955	alcohol dehydrogenase 1B (class I), beta polypeptide, alcohol dehydrogenase 6 (class V), alcohol dehydrogenase 1C (class I), gamma polypeptide, alcohol dehydrogenase 1A (class I), alpha polypeptide, alcohol dehydrogenase 4 (class II), pi polypeptide, alcohol dehydrogenase 7 (class IV), mu or sigma polypeptide, alcohol dehydrogenase 5 (class III), chi polypeptide	NA
HVAEP1-G011384	CLYHEMG010816	0.326255	NA	NA	NA	NA
HVAEP1-G004289	asmbl_36614	0.326215	NUP50	ENSG00000093000	nucleoporin 50	NA
HVAEP1-G017030	asmbl_37950	0.326198	NA	NA	NA	NA
HVAEP1-G023140	asmbl_63030	0.326049	PRKG1	ENSG00000185532	protein kinase cGMP-dependent 1	NA
HVAEP1-G024887	asmbl_84905	0.326008	DDX46	ENSG00000145833	DEAD-box helicase 46	NA
HVAEP1-G027674	asmbl_69138	0.32594	PSMA7, PSMA8	ENSG00000101182, ENSG00000154611	proteasome 20S subunit alpha 8, proteasome 20S subunit alpha 7	NA
HVAEP1-G011200	asmbl_864	0.325926	NA	NA	NA	NA
HVAEP1-G015979	asmbl_14814	0.325916	NA	NA	NA	NA
HVAEP1-G010261	asmbl_40575	0.325822	NA	NA	NA	NA
HVAEP1-G007238	asmbl_81743	0.325801	NA	NA	NA	NA
HVAEP1-G016241	asmbl_16089	0.325609	GSDME, PJVK	ENSG00000105928, ENSG00000204311	gasdermin E, pejvakin	NA
HVAEP1-G026307	asmbl_32926	0.325517	NIM1K	ENSG00000177453	NIM1 serine/threonine protein kinase	NA
HVAEP1-G022297	asmbl_68094	0.325435	NA	NA	NA	NA
HVAEP1-G023422	asmbl_5995	0.325392	WRN	ENSG00000165392	WRN RecQ like helicase	NA
HVAEP1-G003784	asmbl_42493	0.325101	MAN1B1	ENSG00000177239	mannosidase alpha class 1B member 1	NA
HVAEP1-G018931	asmbl_3745	0.325082	SUDS3	ENSG00000111707	SDS3 homolog, SIN3A corepressor complex component	NA
HVAEP1-G021819	asmbl_50778	0.324788	DKK4, DKK2, DKK1, DKK3	ENSG00000104371, ENSG00000155011, ENSG00000107984, ENSG00000050165	dickkopf WNT signaling pathway inhibitor 1, dickkopf WNT signaling pathway inhibitor 4, dickkopf WNT signaling pathway inhibitor 2, dickkopf WNT signaling pathway inhibitor 3	NA
HVAEP1-G001439	asmbl_80924	0.324725	ALDH5A1	ENSG00000112294	aldehyde dehydrogenase 5 family member A1	NA
HVAEP1-G016518	asmbl_1013	0.324496	PSMC1	ENSG00000100764	proteasome 26S subunit, ATPase 1	NA
HVAEP1-G014812	asmbl_19154	0.324178	NA	NA	NA	NA
HVAEP1-G027375	asmbl_21699	0.3239	OPLAH	ENSG00000178814	5-oxoprolinase, ATP-hydrolysing	NA
HVAEP1-G016635	asmbl_90427	0.323827	CG8910	FBgn0025833	NA	NA
HVAEP1-G001895	asmbl_81682	0.32359	ATPAF2	ENSG00000171953	ATP synthase mitochondrial F1 complex assembly factor 2	NA
HVAEP1-G001860	asmbl_47585	0.323475	STAG3, STAG2, STAG1	ENSG00000066923, ENSG00000101972, ENSG00000118007	stromal antigen 2, stromal antigen 3, stromal antigen 1	NA
HVAEP1-G000843	asmbl_28144	0.323041	IWS1	ENSG00000163166	interacts with SUPT6H, CTD assembly factor 1	NA
HVAEP1-G000488	CLYHEMG007078	0.322708	MCCC1	ENSG00000078070	methylcrotonoyl-CoA carboxylase 1	NA
HVAEP1-G005306	asmbl_46958	0.322396	TWNK	ENSG00000107815	twinkle mtDNA helicase	NA
HVAEP1-G018653	asmbl_89631	0.322293	NA	NA	NA	NA
HVAEP1-G020224	asmbl_66057	0.321992	TTLL4	ENSG00000135912	tubulin tyrosine ligase like 4	NA
HVAEP1-G024919	asmbl_64041	0.321947	LARP6	ENSG00000166173	La ribonucleoprotein 6, translational regulator	NA
HVAEP1-G009467	asmbl_30203	0.321748	COPB2	ENSG00000184432	COPI coat complex subunit beta 2	NA
HVAEP1-G020793	asmbl_82681	0.321692	PSMD11	ENSG00000108671	proteasome 26S subunit, non-ATPase 11	NA
HVAEP1-G016793	asmbl_26791	0.321491	YIF1B, YIF1A	ENSG00000167645, ENSG00000174851	Yip1 interacting factor homolog B, membrane trafficking protein, Yip1 interacting factor homolog A, membrane trafficking protein	NA
HVAEP1-G026362	asmbl_21800	0.321209	FAM50A, FAM50B	ENSG00000071859, ENSG00000145945	family with sequence similarity 50 member B, family with sequence similarity 50 member A	NA
HVAEP1-G008393	asmbl_38772	0.321118	NA	NA	NA	NA
HVAEP1-G022884	asmbl_44994	0.3209	OGFOD3	ENSG00000181396	2-oxoglutarate and iron dependent oxygenase domain containing 3	NA
HVAEP1-G004042	asmbl_5081	0.320879	QTRT2	ENSG00000151576	queuine tRNA-ribosyltransferase accessory subunit 2	NA
HVAEP1-G022272	asmbl_59277	0.32086	NA	NA	NA	NA
HVAEP1-G027766	asmbl_1087	0.320793	SUPT4H1	ENSG00000213246	SPT4 homolog, DSIF elongation factor subunit	NA
HVAEP1-G016262	asmbl_73327	0.32079	NUP133	ENSG00000069248	nucleoporin 133	NA
HVAEP1-G007276	asmbl_30188	0.32078	POLR2F	ENSG00000100142	RNA polymerase II, I and III subunit F	NA
HVAEP1-G016096	asmbl_19413	0.320613	RPS16	ENSG00000105193	ribosomal protein S16	AY159357.1; ribosomal protein S16
HVAEP1-G020539	asmbl_68420	0.320269	CWF19L1	ENSG00000095485	CWF19 like cell cycle control factor 1	NA
HVAEP1-G003996	CLYHEMG011874	0.320176	TRNAU1AP	ENSG00000180098	tRNA selenocysteine 1 associated protein 1	NA
HVAEP1-G020176	asmbl_9777	0.320131	PTPRA, PTPRE	ENSG00000132670, ENSG00000132334	protein tyrosine phosphatase receptor type A, protein tyrosine phosphatase receptor type E	NA
HVAEP1-G023351	asmbl_79751	0.320076	TMEM68	ENSG00000167904	transmembrane protein 68	NA
HVAEP1-G001488	asmbl_81654	0.319708	FARP2, FARP1	ENSG00000006607, ENSG00000152767	FERM, ARH/RhoGEF and pleckstrin domain protein 1, FERM, ARH/RhoGEF and pleckstrin domain protein 2	NA
HVAEP1-G005982	asmbl_32816	0.319645	RNF103	ENSG00000239305	ring finger protein 103	NA
HVAEP1-G026577	asmbl_15584	0.31963	IFT122	ENSG00000163913	intraflagellar transport 122	NA
HVAEP1-G025615	asmbl_20113	0.319582	CSNK1G1, CSNK1G2, CSNK1G3	ENSG00000169118, ENSG00000133275, ENSG00000151292	casein kinase 1 gamma 2, casein kinase 1 gamma 1, casein kinase 1 gamma 3	NA
HVAEP1-G020515	asmbl_44587	0.319548	C1orf146	ENSG00000203910	chromosome 1 open reading frame 146	NA
HVAEP1-G027009	asmbl_87675	0.3195	SUV39H2, SUV39H1	ENSG00000152455, ENSG00000101945	suppressor of variegation 3-9 homolog 1, suppressor of variegation 3-9 homolog 2	NA
HVAEP1-G005618	CLYHEMG017183	0.319495	POLR2E	ENSG00000099817	RNA polymerase II, I and III subunit E	NA
HVAEP1-G006945	asmbl_4172	0.319296	MSH2	ENSG00000095002	mutS homolog 2	NA
HVAEP1-G021204	CLYHEMG004483	0.318863	FAM221A	ENSG00000188732	family with sequence similarity 221 member A	NA
HVAEP1-G009383	CLYHEMG000454	0.318524	CG6761	FBgn0036031	NA	NA
HVAEP1-G002013	asmbl_15270	0.318164	NEIL1	ENSG00000140398	nei like DNA glycosylase 1	NA
HVAEP1-G026196	asmbl_47239	0.31795	UROD	ENSG00000126088	uroporphyrinogen decarboxylase	NA
HVAEP1-G003546	asmbl_63919	0.317797	PELI3, PELI1, PELI2	ENSG00000174516, ENSG00000197329, ENSG00000139946	pellino E3 ubiquitin protein ligase family member 2, pellino E3 ubiquitin protein ligase 1, pellino E3 ubiquitin protein ligase family member 3	NA
HVAEP1-G022486	asmbl_66396	0.317733	MICU3, MICU2	ENSG00000155970, ENSG00000165487	mitochondrial calcium uptake 2, mitochondrial calcium uptake family member 3	NA
HVAEP1-G022745	asmbl_68026	0.317715	SEC31B, SEC31A	ENSG00000075826, ENSG00000138674	SEC31 homolog A, COPII coat complex component, SEC31 homolog B, COPII coat complex component	NA
HVAEP1-G016414	asmbl_9193	0.31765	RTF1	ENSG00000137815	RTF1 homolog, Paf1/RNA polymerase II complex component	NA
HVAEP1-G011667	asmbl_8465	0.317506	CSTF1	ENSG00000101138	cleavage stimulation factor subunit 1	NA
HVAEP1-G016568	CLYHEMG020595	0.317403	PRPF31, PRPF31	ENSG00000275885, ENSG00000105618	pre-mRNA processing factor 31	NA
HVAEP1-G007549	asmbl_3341	0.317384	OSBPL2, OSBPL1A	ENSG00000130703, ENSG00000141447	oxysterol binding protein like 1A, oxysterol binding protein like 2	NA
HVAEP1-G016874	asmbl_17811	0.317304	TSNAX, TSNAX-DISC1	ENSG00000116918, ENSG00000270106	translin associated factor X,	NA
HVAEP1-G021059	asmbl_44561	0.317258	CLASP1, CLASP2	ENSG00000074054, ENSG00000163539	cytoplasmic linker associated protein 2, cytoplasmic linker associated protein 1	NA
HVAEP1-G001211	asmbl_80908	0.316992	DAW1	ENSG00000123977	dynein assembly factor with WD repeats 1	NA
HVAEP1-G019234	asmbl_35701	0.316979	SMTN, SMTNL2, SMTNL1	ENSG00000183963, ENSG00000188176, ENSG00000214872	smoothelin, smoothelin like 1, smoothelin like 2	NA
HVAEP1-G013004	asmbl_47246	0.316975	AP-1mu	FBgn0024833	NA	NA
HVAEP1-G005194	asmbl_4215	0.316831	THOC1	ENSG00000079134	THO complex 1	NA
HVAEP1-G021473	nbis-gene-27	0.316818	TUSC3, MAGT1	ENSG00000104723, ENSG00000102158	tumor suppressor candidate 3, magnesium transporter 1	NA
HVAEP1-G001872	asmbl_43945	0.316727	EIF2A	ENSG00000144895	eukaryotic translation initiation factor 2A	NA
HVAEP1-G003802	asmbl_48406	0.316709	MORN5	ENSG00000185681	MORN repeat containing 5	NA
HVAEP1-G003560	asmbl_68905	0.316705	Mps1	FBgn0000063	NA	NA
HVAEP1-G008312	asmbl_82404	0.31667	SF1	ENSG00000168066	splicing factor 1	NA
HVAEP1-G021062	CLYHEMG024027	0.316633	CDK2, CDK3	ENSG00000123374, ENSG00000250506	cyclin dependent kinase 2, cyclin dependent kinase 3	NA
HVAEP1-G017130	asmbl_7383	0.316628	ABHD12B, ABHD12	ENSG00000131969, ENSG00000100997	abhydrolase domain containing 12, lysophospholipase, abhydrolase domain containing 12B	NA
HVAEP1-G025841	asmbl_25615	0.31656	MARCHF4, MARCHF9, MARCHF11	ENSG00000144583, ENSG00000139266, ENSG00000183654	membrane associated ring-CH-type finger 11, membrane associated ring-CH-type finger 9, membrane associated ring-CH-type finger 4	NA
HVAEP1-G007794	asmbl_82245	0.316411	PPP3CC, PPP3CA, PPP3CB	ENSG00000120910, ENSG00000138814, ENSG00000107758	protein phosphatase 3 catalytic subunit gamma, protein phosphatase 3 catalytic subunit alpha, protein phosphatase 3 catalytic subunit beta	NA
HVAEP1-G020915	asmbl_44598	0.316374	NA	NA	NA	NA
HVAEP1-G018111	asmbl_64981	0.316297	DRG1	ENSG00000185721	developmentally regulated GTP binding protein 1	NA
HVAEP1-G025644	asmbl_65918	0.316043	CRTC2, CRTC3, CRTC1	ENSG00000160741, ENSG00000140577, ENSG00000105662	CREB regulated transcription coactivator 1, CREB regulated transcription coactivator 3, CREB regulated transcription coactivator 2	NA
HVAEP1-G015994	asmbl_86060	0.315968	TECPR2	ENSG00000196663	tectonin beta-propeller repeat containing 2	NA
HVAEP1-G020127	asmbl_88260	0.315904	ARHGAP9, ARHGAP15, ARHGAP12, ARHGAP27, ARHGAP27, ARHGAP27	ENSG00000123329, ENSG00000075884, ENSG00000165322, ENSG00000276907, ENSG00000159314, ENSG00000276836	Rho GTPase activating protein 27, Rho GTPase activating protein 12, Rho GTPase activating protein 9, Rho GTPase activating protein 15	NA
HVAEP1-G025735	asmbl_44225	0.315817	ECI1	ENSG00000167969	enoyl-CoA delta isomerase 1	NA
HVAEP1-G025604	asmbl_39738	0.315453	NA	NA	NA	EU035763.1; bcl-2-like 5
HVAEP1-G014632	asmbl_51388	0.315352	REXO5	ENSG00000005189	RNA exonuclease 5	NA
HVAEP1-G013090	asmbl_57084	0.315231	SDR39U1	ENSG00000100445	short chain dehydrogenase/reductase family 39U member 1	NA
HVAEP1-G018889	asmbl_12717	0.315231	ELP3	ENSG00000134014	elongator acetyltransferase complex subunit 3	NA
HVAEP1-G002335	asmbl_6556	0.314947	PFDN2	ENSG00000143256	prefoldin subunit 2	NA
HVAEP1-G005714	asmbl_61315	0.314945	MIX23	ENSG00000160124	mitochondrial matrix import factor 23	NA
HVAEP1-G016180	asmbl_17568	0.314858	ATL3, ATL1, ATL2	ENSG00000184743, ENSG00000198513, ENSG00000119787	atlastin GTPase 1, atlastin GTPase 2, atlastin GTPase 3	NA
HVAEP1-G028567	CLYHEMG013330	0.31477	KIAA1143, KIAA1143	ENSG00000281665, ENSG00000163807	KIAA1143	NA
HVAEP1-G017067	asmbl_74747	0.314741	CNIH1, CNIH2, CNIH3	ENSG00000100528, ENSG00000174871, ENSG00000143786	cornichon family AMPA receptor auxiliary protein 1, cornichon family AMPA receptor auxiliary protein 3, cornichon family AMPA receptor auxiliary protein 2	NA
HVAEP1-G020516	asmbl_62730	0.314625	OS9	ENSG00000135506	OS9 endoplasmic reticulum lectin	NA
HVAEP1-G007007	asmbl_85791	0.314383	NSUN6	ENSG00000241058	NOP2/Sun RNA methyltransferase 6	NA
HVAEP1-G010242	asmbl_52105	0.314317	ZMAT2	ENSG00000146007	zinc finger matrin-type 2	NA
HVAEP1-G026733	asmbl_21745	0.314284	COPG1, COPG2	ENSG00000181789, ENSG00000158623	COPI coat complex subunit gamma 2, COPI coat complex subunit gamma 1	NA
HVAEP1-G010496	asmbl_79923	0.314231	RCCD1	ENSG00000166965	RCC1 domain containing 1	NA
HVAEP1-G027049	asmbl_68856	0.314231	PSMD6	ENSG00000163636	proteasome 26S subunit, non-ATPase 6	NA
HVAEP1-G006180	asmbl_47473	0.314208	CRYZL1	ENSG00000205758	crystallin zeta like 1	NA
HVAEP1-G021104	asmbl_9787	0.314195	CALCOCO2, CALCOCO1, TAX1BP1	ENSG00000136436, ENSG00000012822, ENSG00000106052	Tax1 binding protein 1, calcium binding and coiled-coil domain 1, calcium binding and coiled-coil domain 2	NA
HVAEP1-G015374	asmbl_64768	0.314175	PARP3	ENSG00000041880	poly(ADP-ribose) polymerase family member 3	NA
HVAEP1-G016907	CLYHEMG008964	0.314056	HSCB	ENSG00000100209	HscB mitochondrial iron-sulfur cluster cochaperone	NA
HVAEP1-G017890	asmbl_926	0.314043	INTS2	ENSG00000108506	integrator complex subunit 2	NA
HVAEP1-G027591	CLYHEMG005593	0.313607	CNOT11	ENSG00000158435	CCR4-NOT transcription complex subunit 11	NA
HVAEP1-G010451	asmbl_29859	0.313521	LRRC47	ENSG00000130764	leucine rich repeat containing 47	NA
HVAEP1-G014523	asmbl_91714	0.313323	CHTF18	ENSG00000127586	chromosome transmission fidelity factor 18	NA
HVAEP1-G001706	asmbl_53368	0.313234	NA	NA	NA	NA
HVAEP1-G023619	CLYHEMG015858	0.313085	HADHB	ENSG00000138029	hydroxyacyl-CoA dehydrogenase trifunctional multienzyme complex subunit beta	NA
HVAEP1-G010271	asmbl_55754	0.312958	ZC3H4, ZC3H8, ZC3H6	ENSG00000130749, ENSG00000144161, ENSG00000188177	zinc finger CCCH-type containing 4, zinc finger CCCH-type containing 8, zinc finger CCCH-type containing 6	NA
HVAEP1-G020466	asmbl_15506	0.312478	CLP1	ENSG00000172409	cleavage factor polyribonucleotide kinase subunit 1	NA
HVAEP1-G018779	asmbl_44393	0.312438	PRPF19	ENSG00000110107	pre-mRNA processing factor 19	NA
HVAEP1-G005975	asmbl_47982	0.312433	KATNA1, KATNAL1	ENSG00000186625, ENSG00000102781	katanin catalytic subunit A1 like 1, katanin catalytic subunit A1	NA
HVAEP1-G006908	asmbl_48020	0.312008	TFG	ENSG00000114354	trafficking from ER to golgi regulator	NA
[truncated: 3,980 more rows]

## Sheet: Legend
Supplemental Data S17. Expression correlation scores for orthologous gene pairs in the Hydra and Clytia cell atlases. Ortholog pairs were deemed to have similar expression in Clytia and Hydra if their pseudo-cell correlation score was ≥ 0.65. In addition to the Hydra and Clytia gene IDs and the pseudo-cell correlation score, each row also contains functional annotations based on bilaterian orthol…
