# Supplementary material for: A chromosome-scale epigenetic map of the Hydra genome reveals conserved regulators of cell state
Source: HighWire-hosted journal article supplement (doi:10.1101/gr.277040.122), 2023-01-13
Supplement: Supplemental_Table_S1.xlsx [file Supplemental_Table_S1.xlsx]

## Sheet: Table S1
		C. elegans	D. melanogaster	D. rerio	M. musculus	H. sapiens	N. vectensis	H. viridissima	H. vulgaris
Exon Size (bp)	1st Q	109	155	91	94	92	78	85	78
	Median	164	286	132	134	132	122	141	130
	3rd Q	274	619	196	200	194	213	275	242
Intron Size (bp)	1st Q	47	59	149	464	509	231	125	144
	Median	63	71	1095	1330	1547	436	235	634
	3rd Q	329	369.5	2675	3271	4154	819	727	3744.75
Gene Size (bp)	1st Q	1201	1135	5582.5	6165.25	8819	773	1850	741
	Median	2000	2060	13107	16539	25136	2472	4407	2326
	3rd Q	3561	4568	31064	42825.5	66071	6124	10100.5	18908
Intergenic Distance (bp)	1st Q	354	277	2789.75	5033	4976.5	1129	769	2352
	Median	925	951	7430	16831	19689.5	3518	2838	10992
	3rd Q	2583	2783	22019.5	51821.5	65689.8	7909	7177	24895

## Sheet: Legend
Table S1. Summary statistics for exon size, intron size, gene size, and intergenic distance across different metazoan genomes.
