# Supplementary material for: A chromosome-scale epigenetic map of the Hydra genome reveals conserved regulators of cell state
Source: HighWire-hosted journal article supplement (doi:10.1101/gr.277040.122), 2023-01-13
Supplement: Supplemental_Table_S2.xlsx [file Supplemental_Table_S2.xlsx]

## Sheet: Table S2
	H. vulgaris, strain AEP genome (This Study)	H. vulgaris, strain 105 genome v3 (Simakov et al., 2022)	H. vulgaris, strain 105 genome v2 (Chapman et al., 2010; arusha.nhgri.nih.gov/hydra)	H. vulgaris, strain AEP protein models (This Study)	H. vulgaris, strain 105 protein models (Chapman et al., 2010; arusha.nhgri.nih.gov/hydra)
Genes	NA	NA	NA	28917	33820
Isoforms	NA	NA	NA	37784	36059
Complete BUSCOs	866 (90.7%)	862 (90.3%)	821 (86.1%)	903 (94.7%)	790 (82.8%)
Complete and single-copy BUSCOs	859 (90.0%)	857 (89.8%)	808 (84.7%)	890 (93.3%)	767 (80.4%)
Complete and duplicated BUSCOs	7 (0.7%)	5 (0.5%)	13 (1.4%)	13 (1.4%)	23 (2.4%)
Fragmented BUSCOs	39 (4.1%)	41 ( 4.3%)	61 (6.4%)	16 (1.7%)	86 (9.0%)
Missing BUSCOs	49 (5.2%)	51 (5.4%)	72 (7.5%)	35 (3.6%)	78 (8.2%)
	H. vulgaris, strain AEP LRv2 Transcriptome (Siebert et al., 2019)	H. oligactis strain Innsbruck female12 genome (This study)	H. oligactis, strain CR genome (Vogg et al., 2019)	H. oligactis strain Innsbruck female12 protein models (This Study)	H. viridissima genome (Hamada et al., 2020)
Genes	NA	NA	NA	60590	NA
Isoforms	38749	NA	NA	63777	NA
Complete BUSCOs	913 (95.7%)	841 (88.2%)	444 (46.5%)	823 (86.2%)	839 (88.0%)
Complete and single-copy BUSCOs	876 (91.8%)	718 (75.3%)	357 (37.4%)	731 (76.6%)	828 (86.8%)
Complete and duplicated BUSCOs	37 (3.9%)	123 (12.9%)	87 (9.1%)	92 (9.6%)	11 (1.2%)
Fragmented BUSCOs	9 (0.9%)	63 (6.6%)	290 (30.4%)	74 (7.8%)	59 (6.2%)
Missing BUSCOs	32 (3.4%)	50 (5.2%)	220 (23.1%)	57 (6.0%)	56 (5.8%)
	H. viridissima protein models (Hamada et al., 2020)	C. hemisphaerica genome V2 (Leclère et al., 2019; marimba.obs-vlfr.fr/organism/Clytia/hemisphaerica)	C. hemisphaerica V2 protein models (Leclère et al., 2019; marimba.obs-vlfr.fr/organism/Clytia/hemisphaerica)	C. hemisphaerica protein models (this study)
Genes	21467	NA	19133	30058
Isoforms	25978	NA	28659	52872
Complete BUSCOs	841 (88.2%)	743 (77.9%)	774 (81.1%)	830 (87.0%)
Complete and single-copy BUSCOs	830 (87.0%)	708 (74.2%)	688 (72.1%)	792 (83.0%)
Complete and duplicated BUSCOs	11 (1.2%)	35 (3.7%)	86 (9.0%)	38 (4.0%)
Fragmented BUSCOs	41 (4.3%)	92 (9.6%)	28 (2.9%)	30 (3.1%)
Missing BUSCOs	72 (7.5%)	119 (12.5%)	152 (16.0%)	94 (9.9%)

## Sheet: Legend
Table S2. Benchmarking Universal Single Copy Orthologs (BUSCOs) statistics for hydrozoan reference sequences.
