# Supplementary material for: A chromosome-scale epigenetic map of the Hydra genome reveals conserved regulators of cell state
Source: HighWire-hosted journal article supplement (doi:10.1101/gr.277040.122), 2023-01-13
Supplement: Supplemental_Table_S3.xlsx [file Supplemental_Table_S3.xlsx]

## Sheet: Table S3
H. vulgaris, strain AEP		H. vulgaris, strain 105
Chromosome Numbers	Chromosome Genbank Accessions	Chromosome Numbers	Chromosome Genbank Accessions
1	CM044149.1	4	CM039215.1
2	CM044150.1	6	CM039217.1
3	CM044151.1	3	CM039214.1
4	CM044152.1	12	CM039223.1
5	CM044153.1	15	CM039226.1
6	CM044154.1	8	CM039219.1
7	CM044155.1	14	CM039225.1
8	CM044156.1	11	CM039222.1
9	CM044157.1	5	CM039216.1
10	CM044158.1	10	CM039221.1
11	CM044159.1	7	CM039218.1
12	CM044160.1	2	CM039213.1
13	CM044161.1	9	CM039220.1
14	CM044162.1	13	CM039224.1
15	CM044163.1	1	CM039212.1

## Sheet: Legend
Table S3. Equivalent chromosome number and Genbank accession numbers for the strain AEP and the strain 105 genome assemblies. Note that the chromosome numbering for the version of the strain AEP H. vulgaris assembly available via GenBank (Accession JALDPZ000000000) was changed to be consistent with the numbering used for the strain 105 H. vulgaris assembly (Accession JAGKSS000000000) (Simakov et …
