# Supplementary material for: A chromosome-scale epigenetic map of the Hydra genome reveals conserved regulators of cell state
Source: HighWire-hosted journal article supplement (doi:10.1101/gr.277040.122), 2023-01-13
Supplement: Supplemental_Table_S4.xlsx [file Supplemental_Table_S4.xlsx]

## Sheet: Table S4
	Species	A. millepora	R. esculentum	N. vectensis	N. vectensis
	Citation	Hoencamp et al., 2021	N/A (Sanger TOL)	Zimmerman et al., 2020	N/A (Sanger TOL)
	Replicates	2	1	1	1
	assembly size	387 Mb	257 Mb	252 Mb	269 Mb
	reads	64,576,612 (50X)	203,573,974 (238X)	241,716,709 (288X)	475,467,724 (530X)
	Read Length	2x150 bp	2x150 bp	2x150 bp	2x150 bp
	unique reads	39,163,880 (30X; 60.65%)	142,811,706 (167X; 70.15%)	162,332,213 (193X; 67.16%)	294,161,335 (328X; 61.87%)
	Hi-C contacts	16,893,507 (13X; 26.16% / 43.14%)	97,836,678 (114X; 48.06% / 68.51%)	50,984,147 (61X; 21.09% / 31.41%)	146,525,449 (163X; 30.82% / 49.81%)
	Pair Type (L-I-O-R)	24% - 26% - 26% - 24%	25% - 25% - 25% - 25%	25% - 25% - 25% - 25%	25% - 25% - 25% - 25%
	Inter-chromsomal	7,703,862 (6X; 11.93% / 19.67%)	47,285,042 (55X; 23.23% / 33.11%)	12,491,699 (15X; 5.17% / 7.70%)	46,489,587 (52X; 9.78% / 15.80%)
	Intra-chromosomal, short range (<20Kb)	6,600,992 (5X; 10.22% / 16.85%)	32,005,516 (37X; 15.72% / 22.41%)	22,977,892 (27X; 9.51% / 14.15%)	66,087,147 (74X; 13.90% / 22.47%)
	Intra-chromosomal, short range (<20Kb)	2,588,561 (2X; 4.01% / 6.61%)	18,545,741 (22X; 9.11% / 12.99%)	15,514,452 (18X; 6.42% / 9.56%)	33,948,066 (38X; 7.14% / 11.54%)
	Species	D. lineata	H. octoradiatus	H. vulgaris, strain 105	H. vulgaris, strain AEP
	Citation	N/A (Sanger TOL)	N/A (Sanger TOL)	Simakov et al., 2022	This Study
	Replicates	1	1	2	1
	assembly size	313 Mb	262 Mb	819 Mb	901 Mb				v
	reads	148,743,511 (143X)	411,740,981 (471X)	712,495,485 (174X)	511,738,011 (170X)
	Read Length	2x150 bp	2x150 bp	2x100 bp	2x150 bp
	unique reads	93,862,593 (90X; 63.10%)	282,744,407 (324X; 68.67%)	388,566,548 (95X; 54.54%)	279,407,833 (93X; 54.6%)
	Hi-C contacts	42,181,472 (40X; 28.36% / 44.94%)	174,865,091 (200X; 42.47% / 61.85%)	123,753,379 (30X; 17.37% / 31.85%)	201,337,201 (67X; 39.34% / 72.06%)
	Pair Type (L-I-O-R)	25% - 25% - 25% - 25%	25% - 25% - 25% - 25%	25% - 25% - 25% - 25%	25% - 25% - 25% - 25%
	Inter-chromsomal	12,988,275 (12X; 8.73% / 13.84%)	103,849,889 (119X; 25.22% / 36.73%)	57,383,434 (14X; 8.05% / 14.77%)	28,943,300 (10X; 5.66% / 10.36%)
	Intra-chromosomal, short range (<20Kb)	22,841,329 (22X; 15.36% / 24.33%)	37,047,946 (42X; 9.00% / 13.10%)	56,121,418 (14X; 7.88% / 14.44%)	87,784,428 (29X; 17.15% / 31.42%)
	Intra-chromosomal, short range (<20Kb)	6,351,660 (6X; 4.27% / 6.77%)	66,800,982 (76X; 16.22% / 23.63%)	10,247,830 (2.5X; 1.44% / 2.64%)	84,608,809 (28X; 16.53% / 30.28%)

## Sheet: Legend
Table S4. Library quality statistics for cnidarian Hi-C sequencing libraries.
