# Supplementary material for: A chromosome-scale epigenetic map of the Hydra genome reveals conserved regulators of cell state
Source: HighWire-hosted journal article supplement (doi:10.1101/gr.277040.122), 2023-01-13
Supplement: Supplemental_Table_S5.xlsx [file Supplemental_Table_S5.xlsx]

## Sheet: Table S5
Species	Citation	Download Source
Acropora millepora	Ying et al., 2019	ncbi.nlm.nih.gov/genome/2652
Adineta vaga	Flot et al., 2013	metazoa.ensembl.org/Adineta_vaga/Info/Index
Amphimedon queenslandica	Srivastava et al., 2010; Fernandez-Valverde et al., 2015	metazoa.ensembl.org/Amphimedon_queenslandica/Info/Index
Aurelia aurita	Gold et al., 2019	davidadlergold.faculty.ucdavis.edu/jellyfish/
Bombyx mori	Xia et al., 2008; Duan et al., 2009	metazoa.ensembl.org/Bombyx_mori/Info/Index
Branchiostoma lanceolatum	Marlétaz et al., 2018	metazoa.ensembl.org/Branchiostoma_lanceolatum/Info/Index
Caenorhabditis elegans	Harris et. al., 2019; ﻿C. elegans Sequencing Consortium, 1998	uswest.ensembl.org/Caenorhabditis_elegans/Info/Index
Callorhinchus milii	﻿Venkatesh et al., 2014	uswest.ensembl.org/Callorhinchus_milii/Info/Index
Calvadosia cruxmelitensis	Odhera et al., 2019	github.com/josephryan/Ohdera_et_al_2018/tree/master/AA_Files
Cassiopea xamachana	Odhera et al., 2019	mycocosm.jgi.doe.gov/Casxa1/Casxa1.home.html
Ciona intestinalis	Satou et al., 2008	uswest.ensembl.org/Ciona_intestinalis/Info/Index
Clytia hemisphaerica	Leclère et al., 2019; marimba.obs-vlfr.fr/organism/Clytia/hemisphaerica	Final protein models were generated by this study
Daphnia pulex	﻿Colbourne et al., 2011 and ﻿Colbourne et al., 2005	metazoa.ensembl.org/Daphnia_pulex/Info/Annotation/
Drosophila melanogaster	﻿Adams et al., 2000 and Clark et al., 2007	uswest.ensembl.org/Drosophila_melanogaster/Info/Index
Ephydatia muelleri	Kenny et al., 2020	spaces.facsci.ualberta.ca/ephybase/
Exaiptasia diaphana	Baumgarten et al., 2015	www.ncbi.nlm.nih.gov/genome/92231
Gallus gallus	﻿Hillier et al., 2004	uswest.ensembl.org/Gallus_gallus/Info/Index
Hofstenia miamia	Gehrke et al., 2019	metazoa.ensembl.org/Hofstenia_miamia/Info/Index
Homo sapiens	International Human Genome Sequencing Consortium, 2001; Venter et al., 2001; Genome Reference Consortium	uswest.ensembl.org/Homo_sapiens/Info/Index
Hydra circumcincta*	Wong et al., 2019	Obtained by contacting study authors
Hydra oligactis*	Wong et al., 2019	Obtained by contacting study authors
Hydra viridissima	Hamada et al., 2020	marinegenomics.oist.jp/hydra_viridissima_a99/viewer/download?project_id=82
Hydra vulgaris, strain 105	Chapman et al., 2010	arusha.nhgri.nih.gov/hydra/download/genemodels_proteins/hydra2.0_genemodels.aa.gz
Hydractinia echinata*	NA	research.nhgri.nih.gov/hydractinia/
Latimeria chalumnae	NA	uswest.ensembl.org/Latimeria_chalumnae/Info/Index
Lepisosteus oculatus	Braasch et al., 2016	uswest.ensembl.org/Lepisosteus_oculatus/Info/Index
Mnemiopsis leidyi	Ryan et al., 2013 and Moreland et al., 2020	research.nhgri.nih.gov/mnemiopsis/download/download.cgi?dl=proteome
Monosiga brevicollis	﻿King et al., 2008	protists.ensembl.org/Monosiga_brevicollis_mx1_gca_000002865/Info/Index
Morbakka virulenta	Khalturin et al., 2019	marinegenomics.oist.jp/morbakka_virulenta/viewer/download?project_id=70
Mus Musculus	Mouse Genome Sequencing Consortium, 2002; Genome Reference Consortium	uswest.ensembl.org/Mus_musculus/Info/Index
Nematostella vectensis	﻿Zimmermann et al., 2020	simrbase.stowers.org/starletseaanemone
Octopus bimaculoides	Albertin et al., 2015	metazoa.ensembl.org/Octopus_bimaculoides/Info/Index
Patiria miniata	﻿Kudtarkar and ﻿Cameron, 2017	legacy.echinobase.org/Echinobase/PmDownload
Petromyzon marinus	Smith et al., 2013	uswest.ensembl.org/Petromyzon_marinus/Info/Index
Pleurobrachia bachei	Moroz et al., 2014	neurobase.rc.ufl.edu/Pleurobrachia/download
Porites lutea	Robbins et al., 2019	plut.reefgenomics.org/download/
Praesagittifera naikaiensis	Arimoto et al., 2019	gigadb.org/dataset/100564
Rhopilema esculentum	Li et al., 2020	gigadb.org/dataset/view/id/100720/File_page
Schmidtea mediterranea	Robb et al., 2015	planosphere.stowers.org/smedgd
Scolanthus callimorphus	Zimmermann et al., 2020	simrbase.stowers.org/wormanemone
Strongylocentrotus purpuratus	Sea Urchin Genome Sequencing Consortium 2006 and Cameron et al., 2009	metazoa.ensembl.org/Strongylocentrotus_purpuratus/Info/Index
Trichoplax adhaerens	Srivastava et al., 2008	metazoa.ensembl.org/Trichoplax_adhaerens/Info/Index
Xenopus tropicalis	Hellsten et al., 2010	uswest.ensembl.org/Xenopus_tropicalis/Info/Index

## Sheet: Legend
Table S5. List of sources for proteomes used in the OrthoFinder analysis. * indicates transcriptomes that were translated into protein sequence before being used in the analysis.
