# Supplementary figures and images for: A chromosome-scale epigenetic map of the Hydra genome reveals conserved regulators of cell state
Source: HighWire-hosted journal article supplement (doi:10.1101/gr.277040.122), 2023-01-13

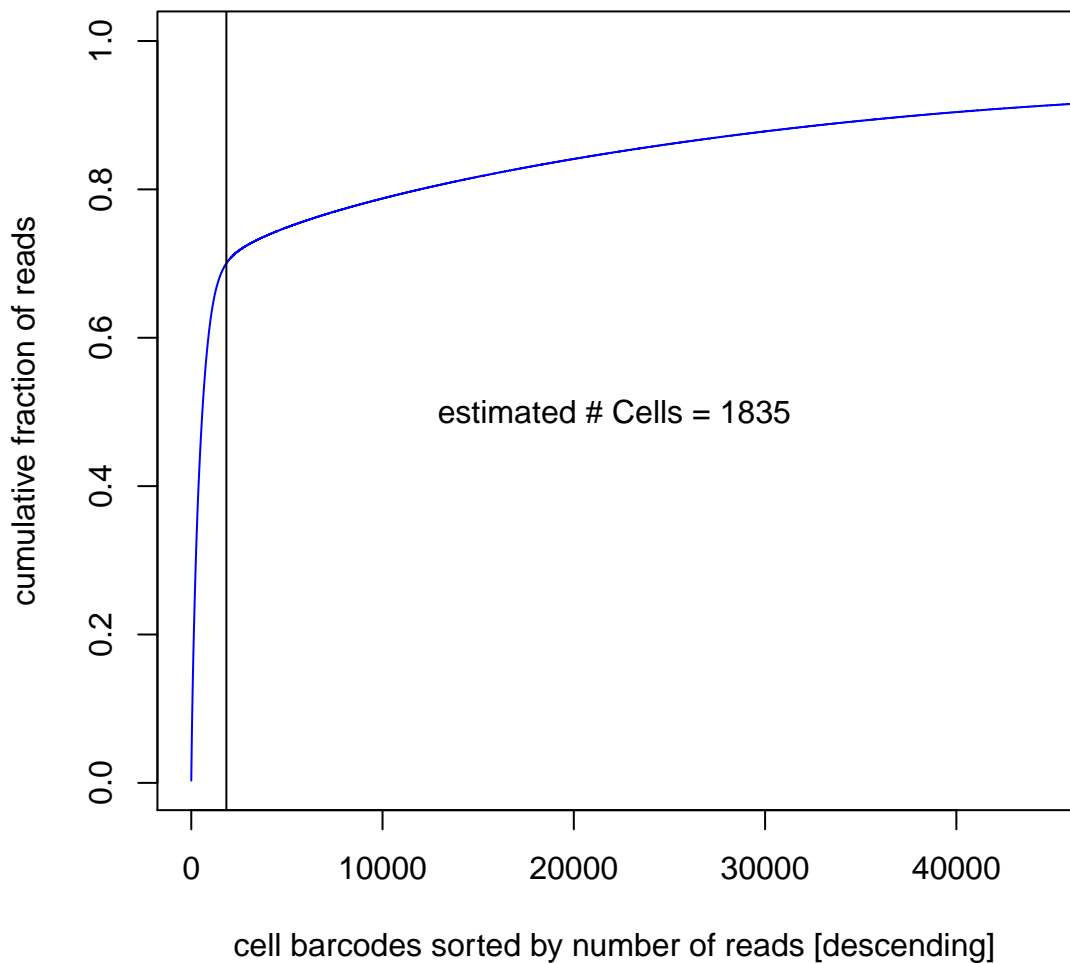

Supplement: Supplemental_Code_S1.tar.gz [file D01-D1_S1.pdf › Supplemental_Code_S1/05_hydraAtlasReMap/01_mapping/dgeGeneration/D01-D1_S1/D01-D1_S1.pdf]

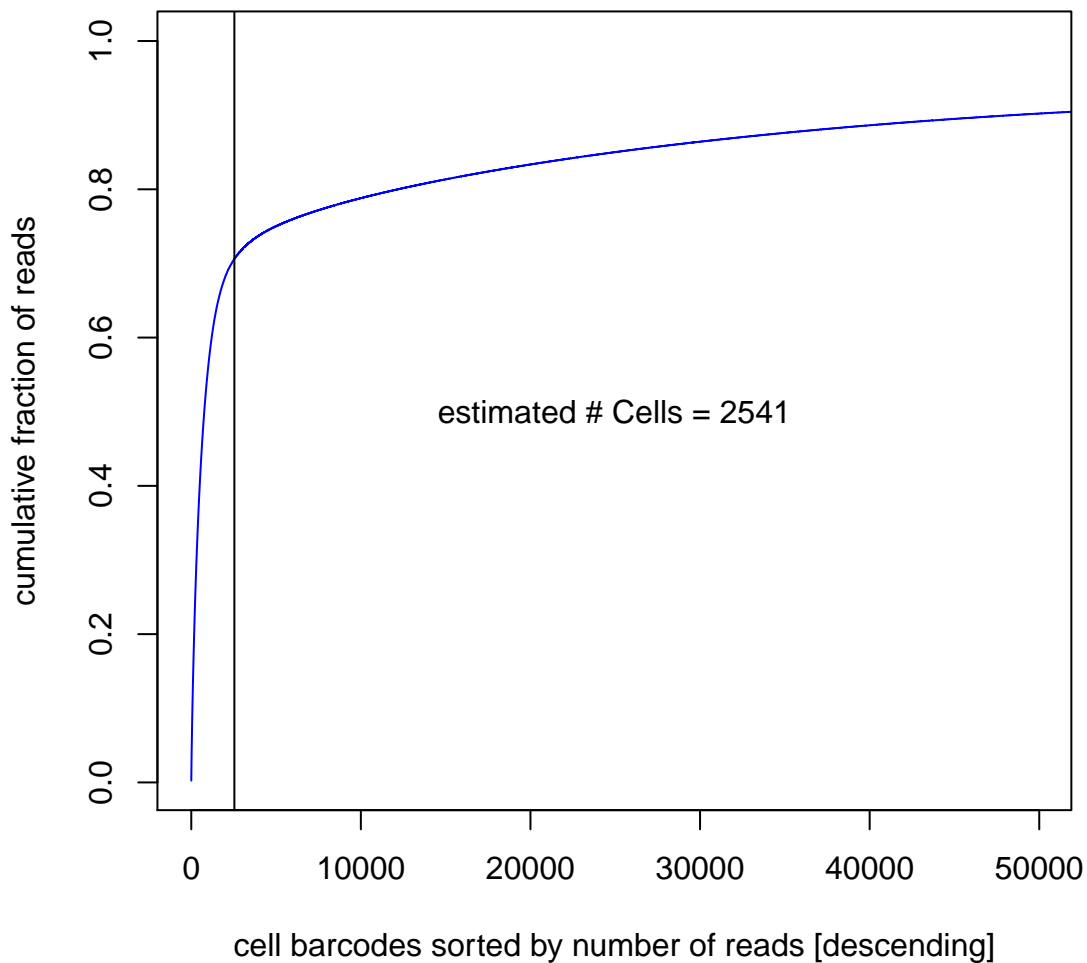

Supplement: Supplemental_Code_S1.tar.gz [file D01-P2_S4.pdf › Supplemental_Code_S1/05_hydraAtlasReMap/01_mapping/dgeGeneration/D01-P2_S4/D01-P2_S4.pdf]

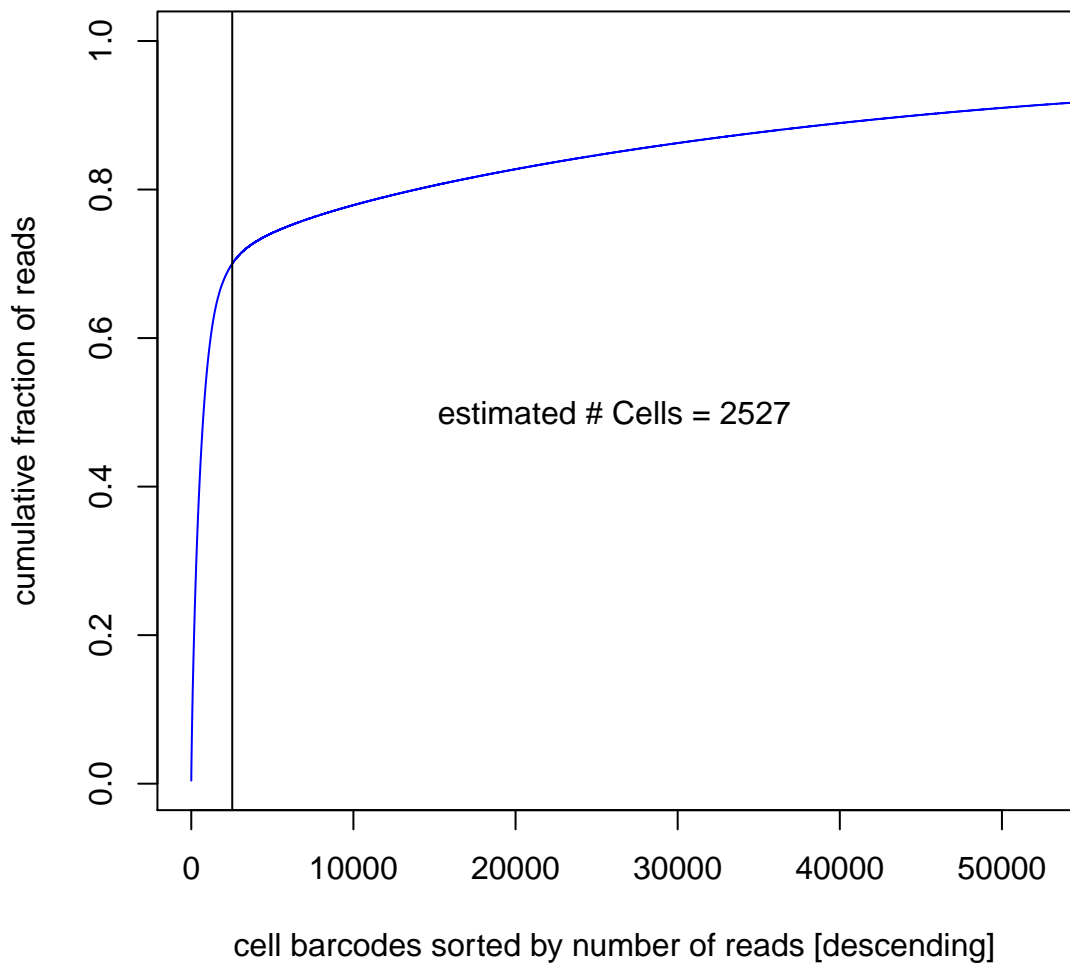

Supplement: Supplemental_Code_S1.tar.gz [file D02-CO_S2.pdf › Supplemental_Code_S1/05_hydraAtlasReMap/01_mapping/dgeGeneration/D02-CO_S2/D02-CO_S2.pdf]

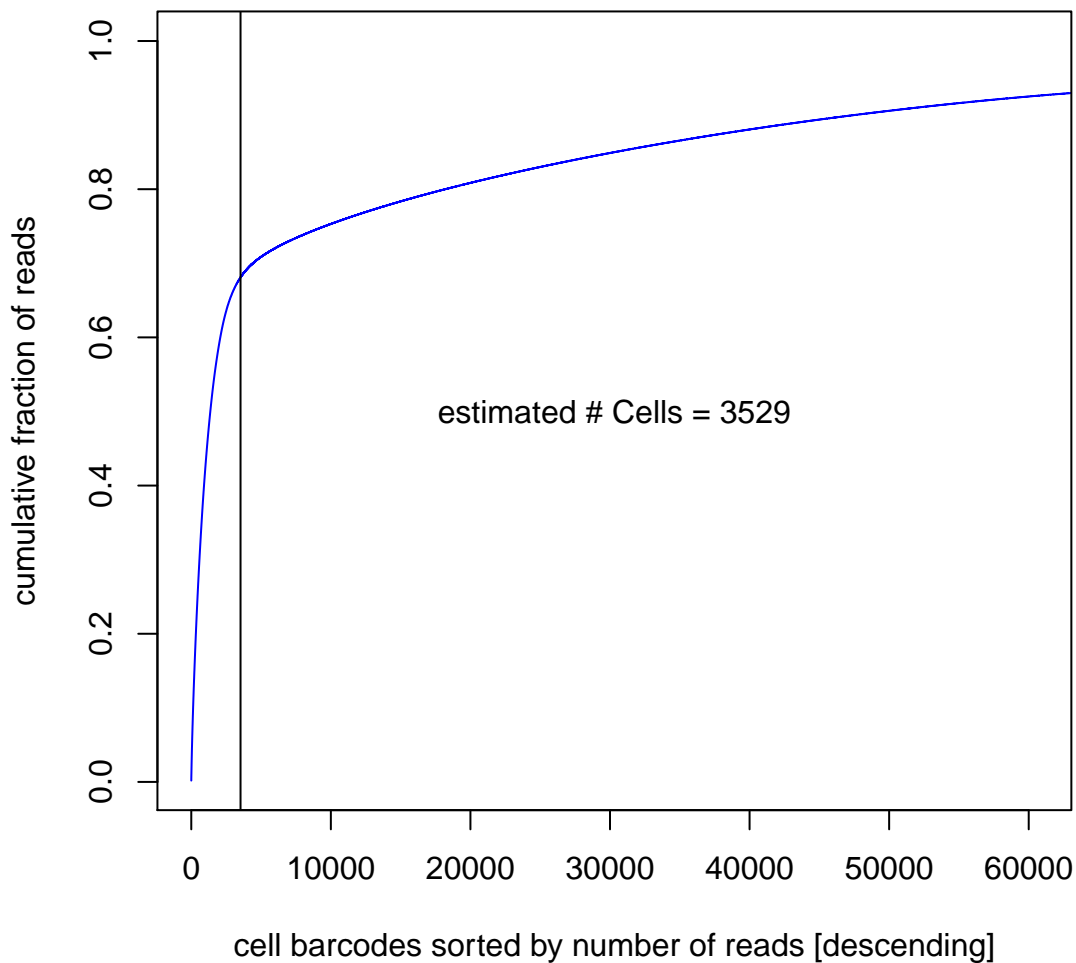

Supplement: Supplemental_Code_S1.tar.gz [file D02-P1_S3.pdf › Supplemental_Code_S1/05_hydraAtlasReMap/01_mapping/dgeGeneration/D02-P1_S3/D02-P1_S3.pdf]

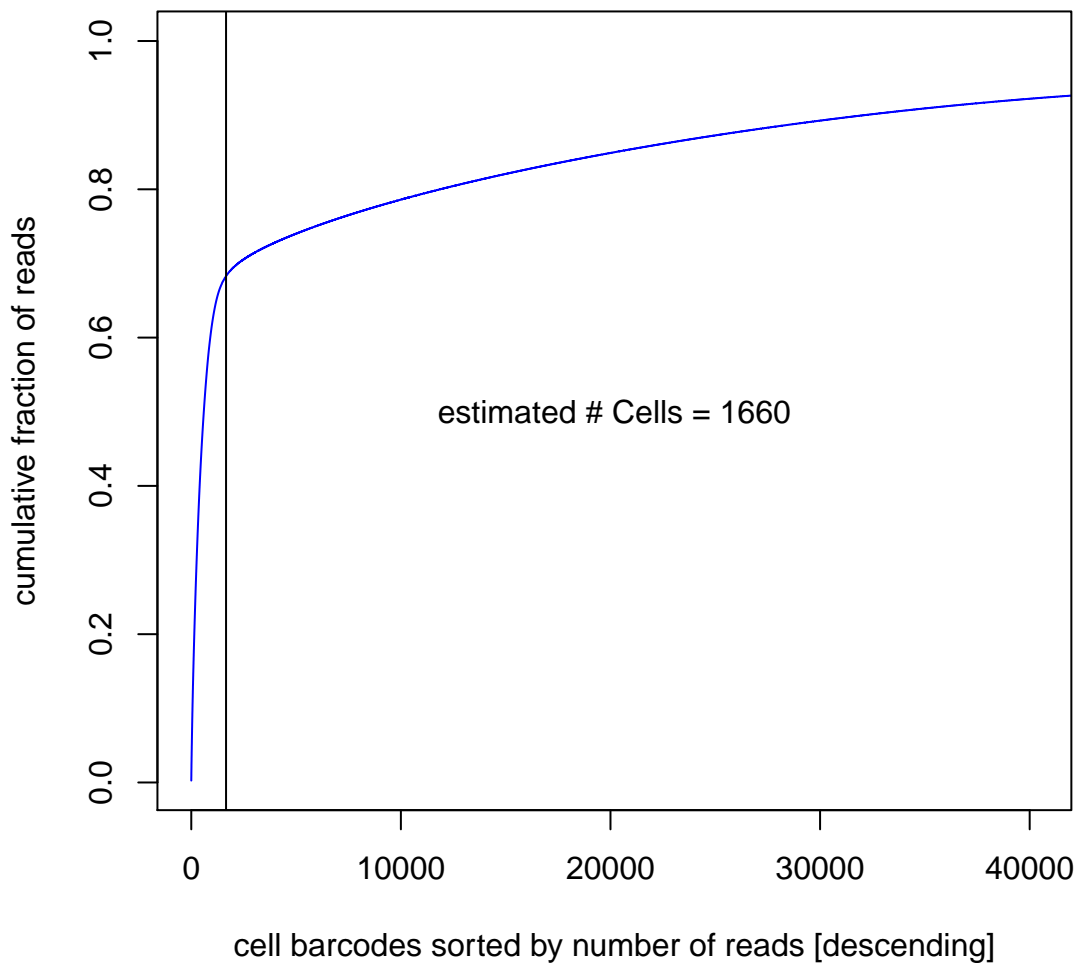

Supplement: Supplemental_Code_S1.tar.gz [file D02-PB_S4.pdf › Supplemental_Code_S1/05_hydraAtlasReMap/01_mapping/dgeGeneration/D02-PB_S4/D02-PB_S4.pdf]

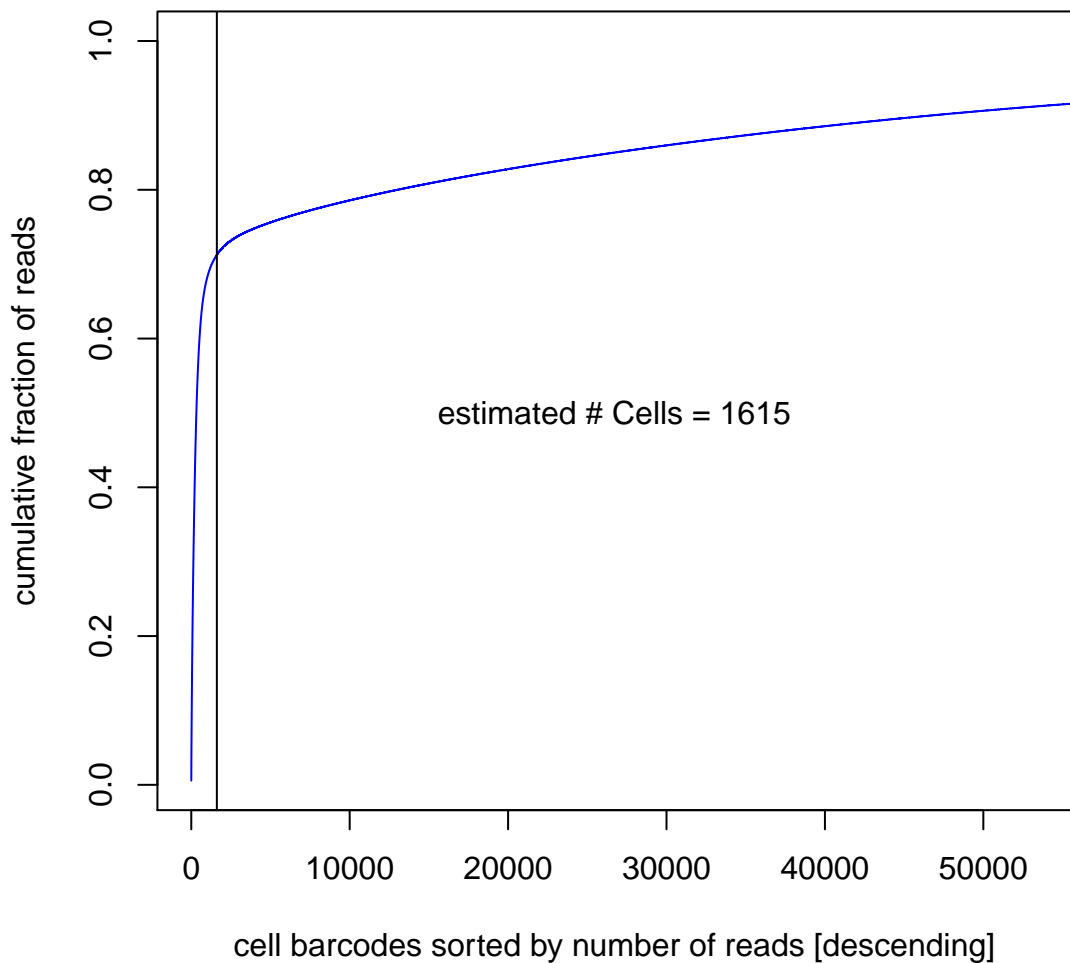

Supplement: Supplemental_Code_S1.tar.gz [file D03-FM_S3.pdf › Supplemental_Code_S1/05_hydraAtlasReMap/01_mapping/dgeGeneration/D03-FM_S3/D03-FM_S3.pdf]

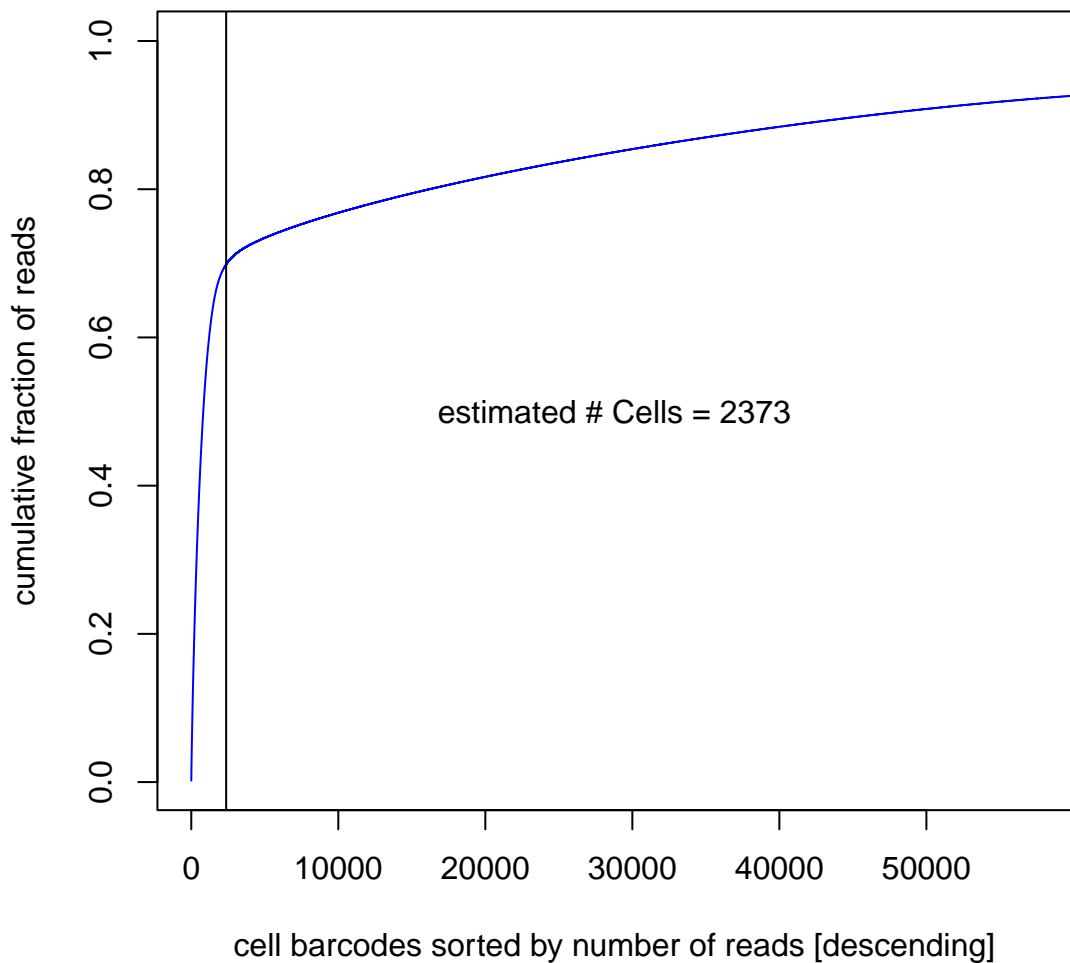

Supplement: Supplemental_Code_S1.tar.gz [file D03-KI_S1.pdf › Supplemental_Code_S1/05_hydraAtlasReMap/01_mapping/dgeGeneration/D03-KI_S1/D03-KI_S1.pdf]

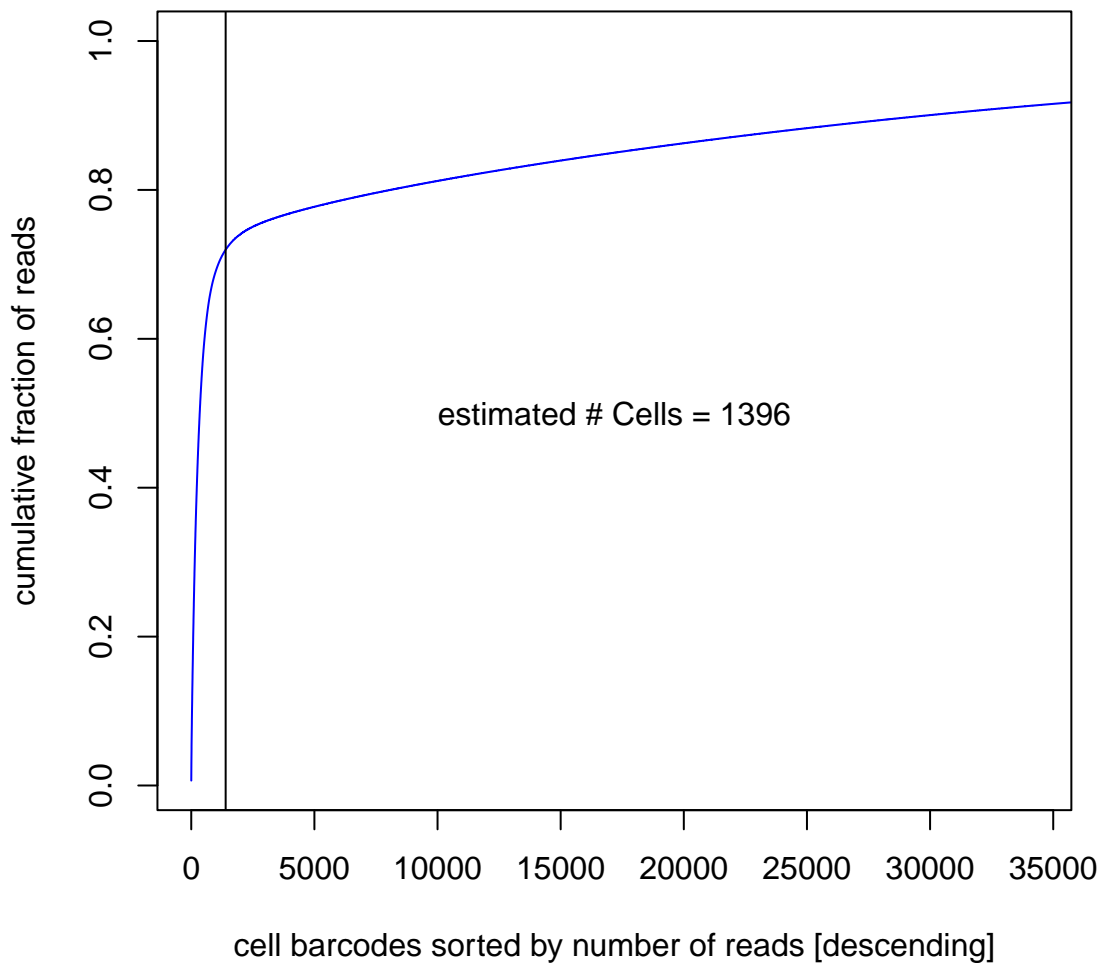

Supplement: Supplemental_Code_S1.tar.gz [file D03-MA_S2.pdf › Supplemental_Code_S1/05_hydraAtlasReMap/01_mapping/dgeGeneration/D03-MA_S2/D03-MA_S2.pdf]

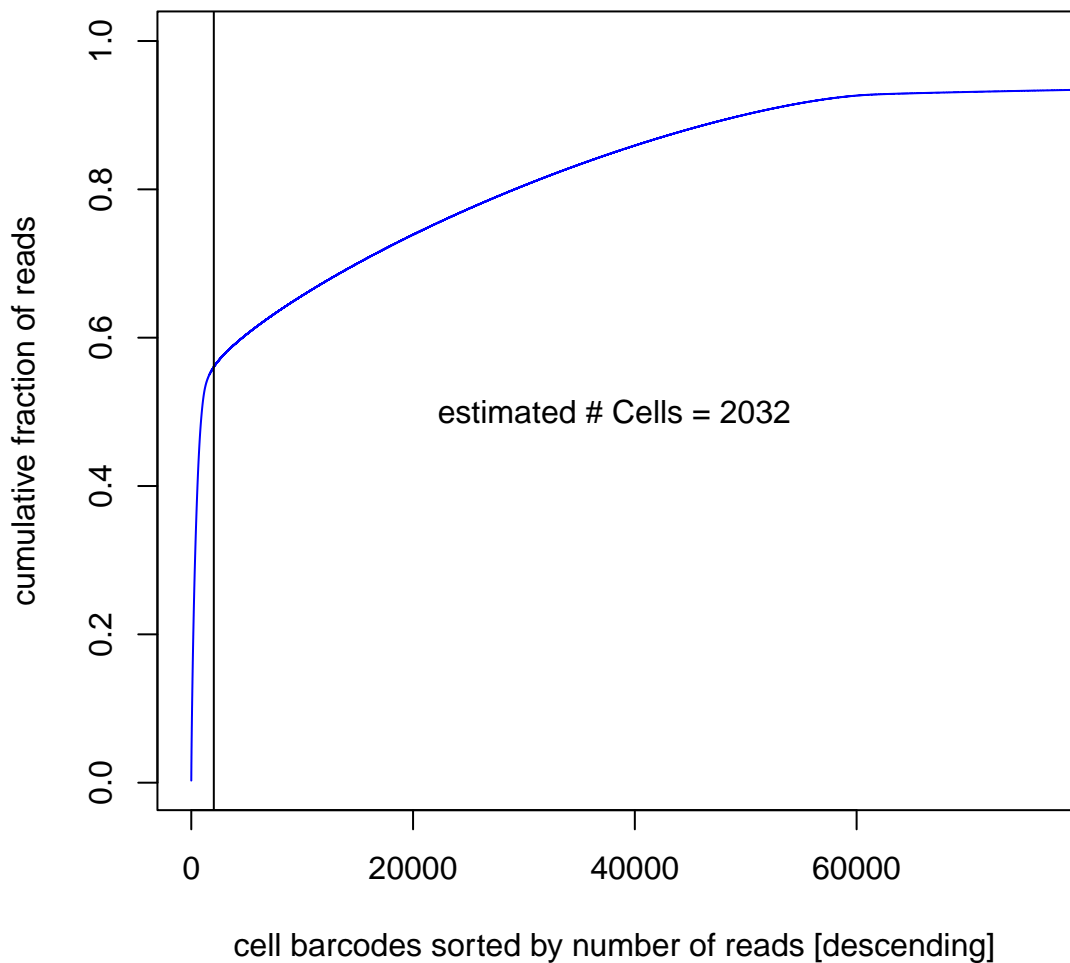

Supplement: Supplemental_Code_S1.tar.gz [file D06-FM_S1.pdf › Supplemental_Code_S1/05_hydraAtlasReMap/01_mapping/dgeGeneration/D06-FM_S1/D06-FM_S1.pdf]

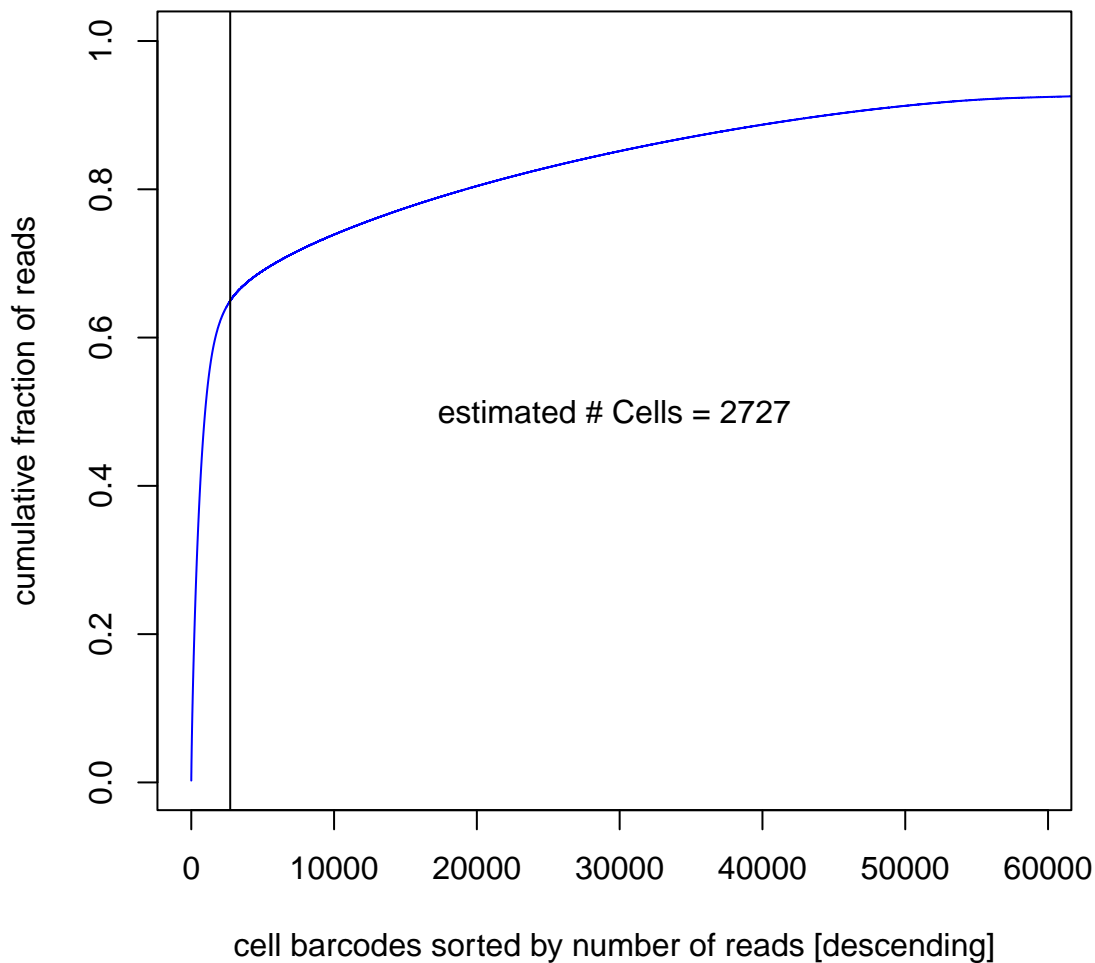

Supplement: Supplemental_Code_S1.tar.gz [file D06-KI_S4.pdf › Supplemental_Code_S1/05_hydraAtlasReMap/01_mapping/dgeGeneration/D06-KI_S4/D06-KI_S4.pdf]

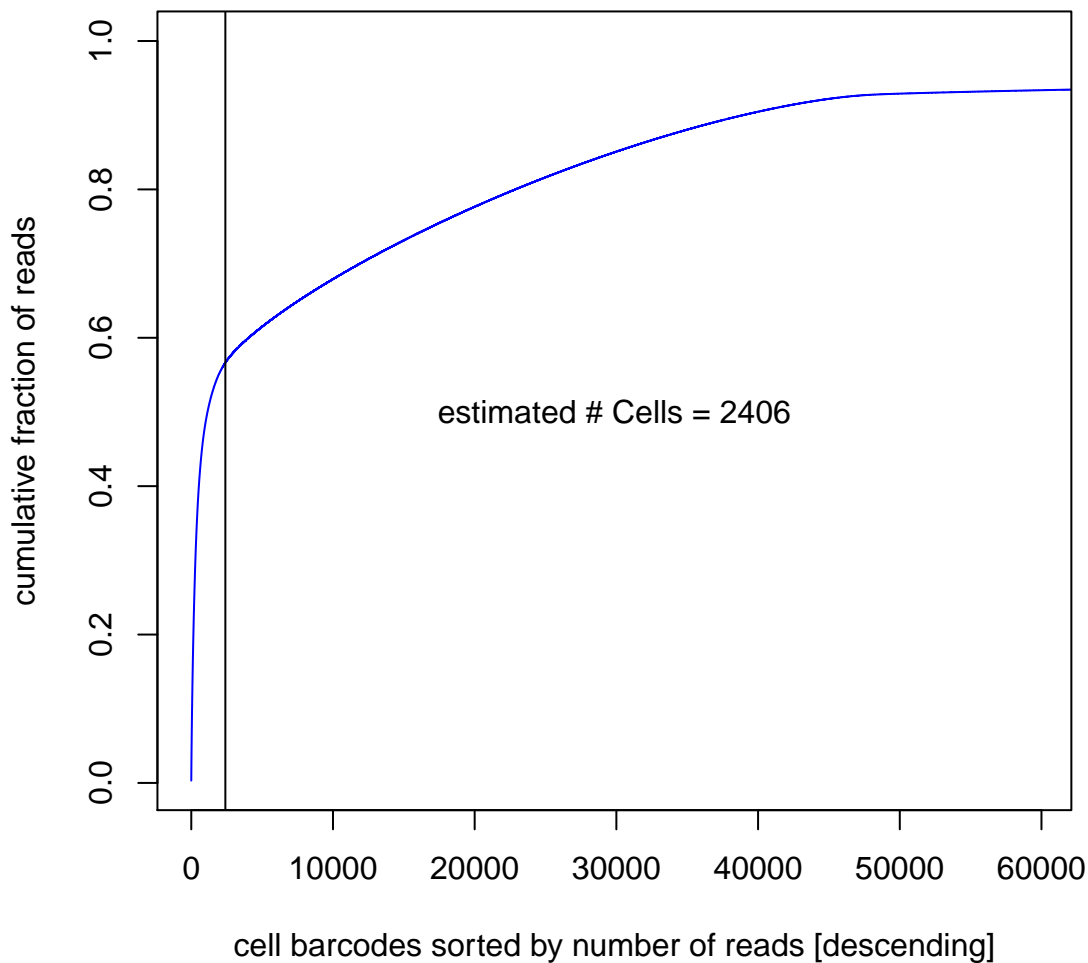

Supplement: Supplemental_Code_S1.tar.gz [file D06-MA_S3.pdf › Supplemental_Code_S1/05_hydraAtlasReMap/01_mapping/dgeGeneration/D06-MA_S3/D06-MA_S3.pdf]

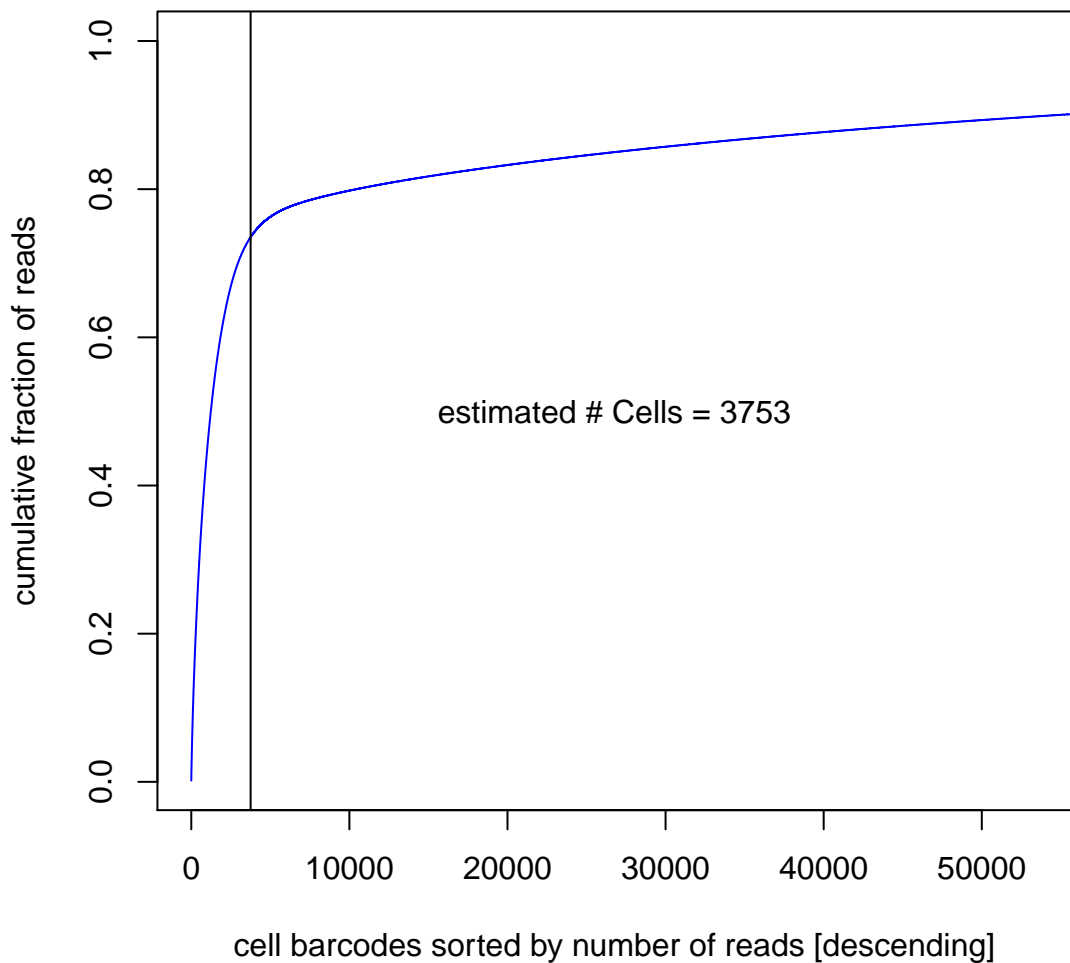

Supplement: Supplemental_Code_S1.tar.gz [file D11-BU_S2.pdf › Supplemental_Code_S1/05_hydraAtlasReMap/01_mapping/dgeGeneration/D11-BU_S2/D11-BU_S2.pdf]

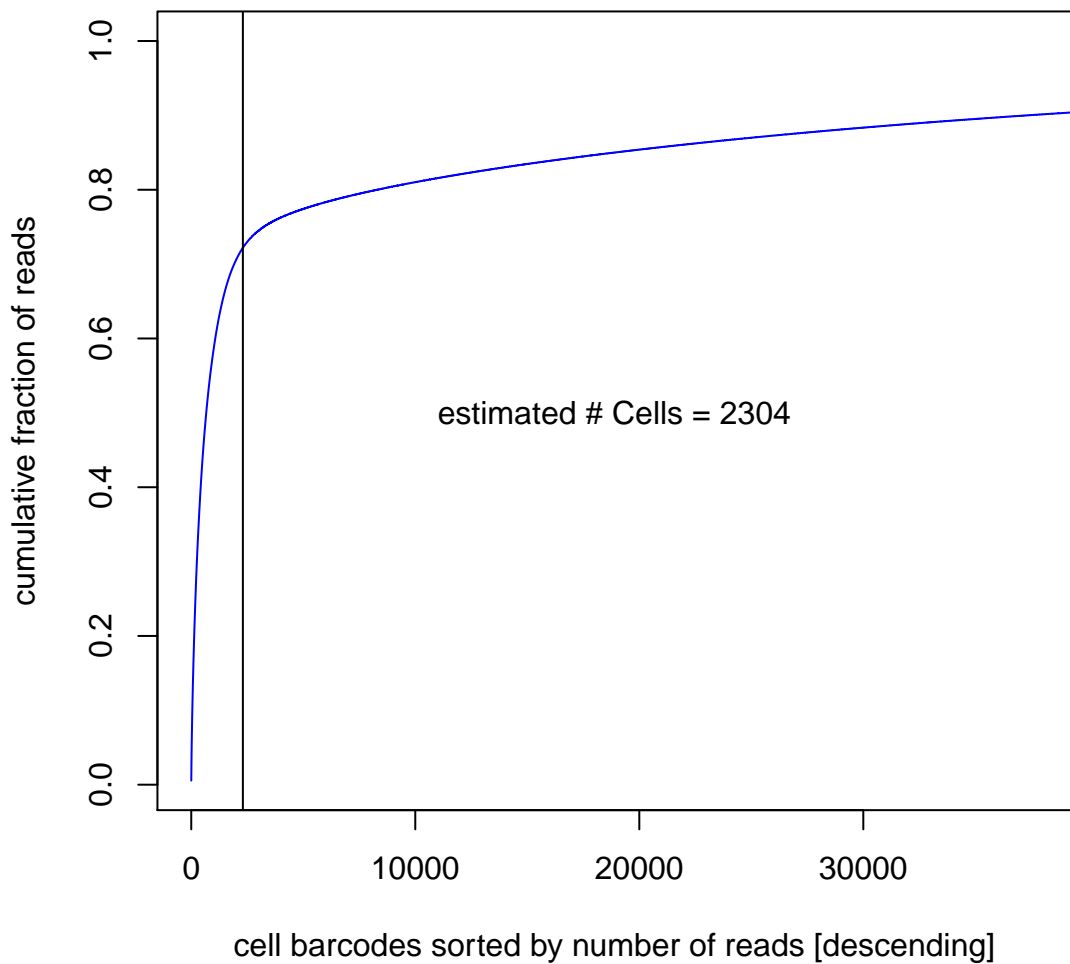

Supplement: Supplemental_Code_S1.tar.gz [file D11-PO_S1.pdf › Supplemental_Code_S1/05_hydraAtlasReMap/01_mapping/dgeGeneration/D11-PO_S1/D11-PO_S1.pdf]

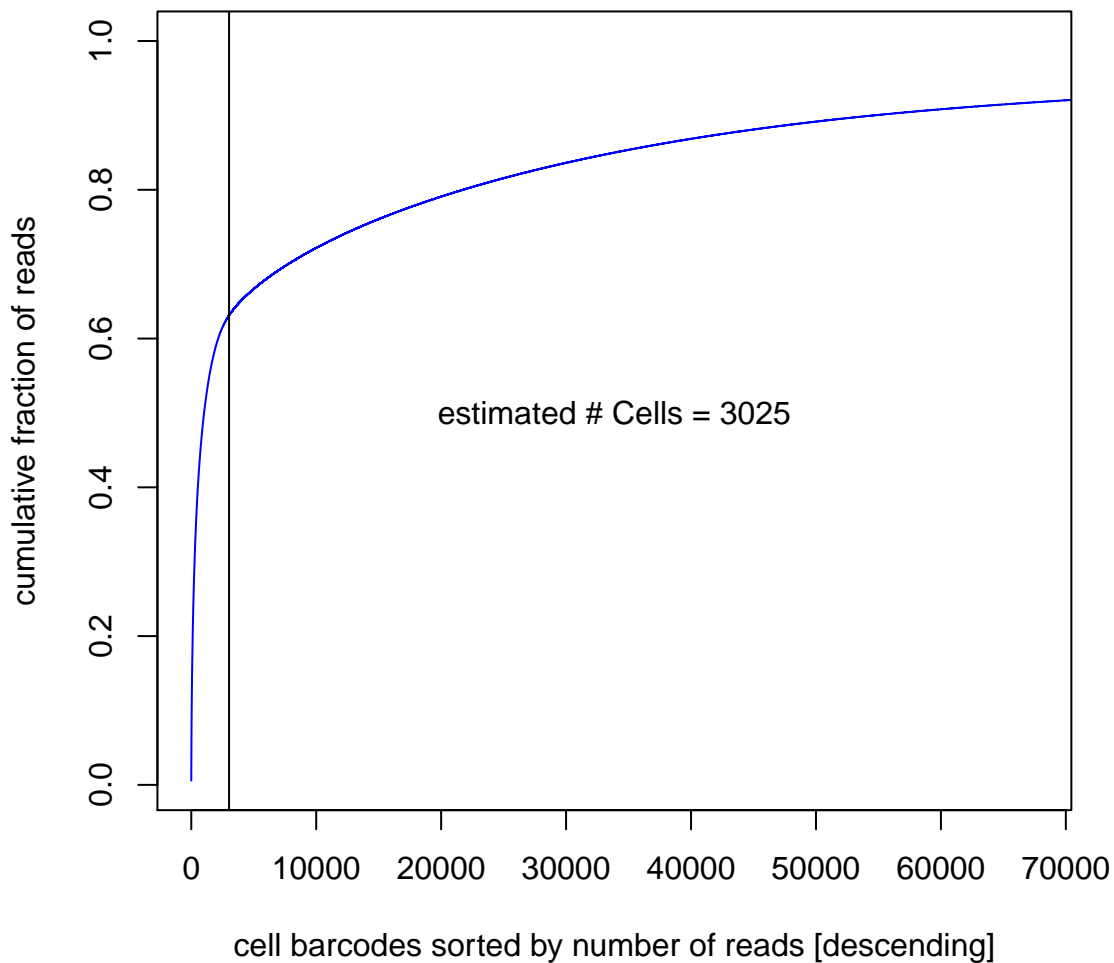

Supplement: Supplemental_Code_S1.tar.gz [file D12-N1_S1.pdf › Supplemental_Code_S1/05_hydraAtlasReMap/01_mapping/dgeGeneration/D12-N1_S1/D12-N1_S1.pdf]

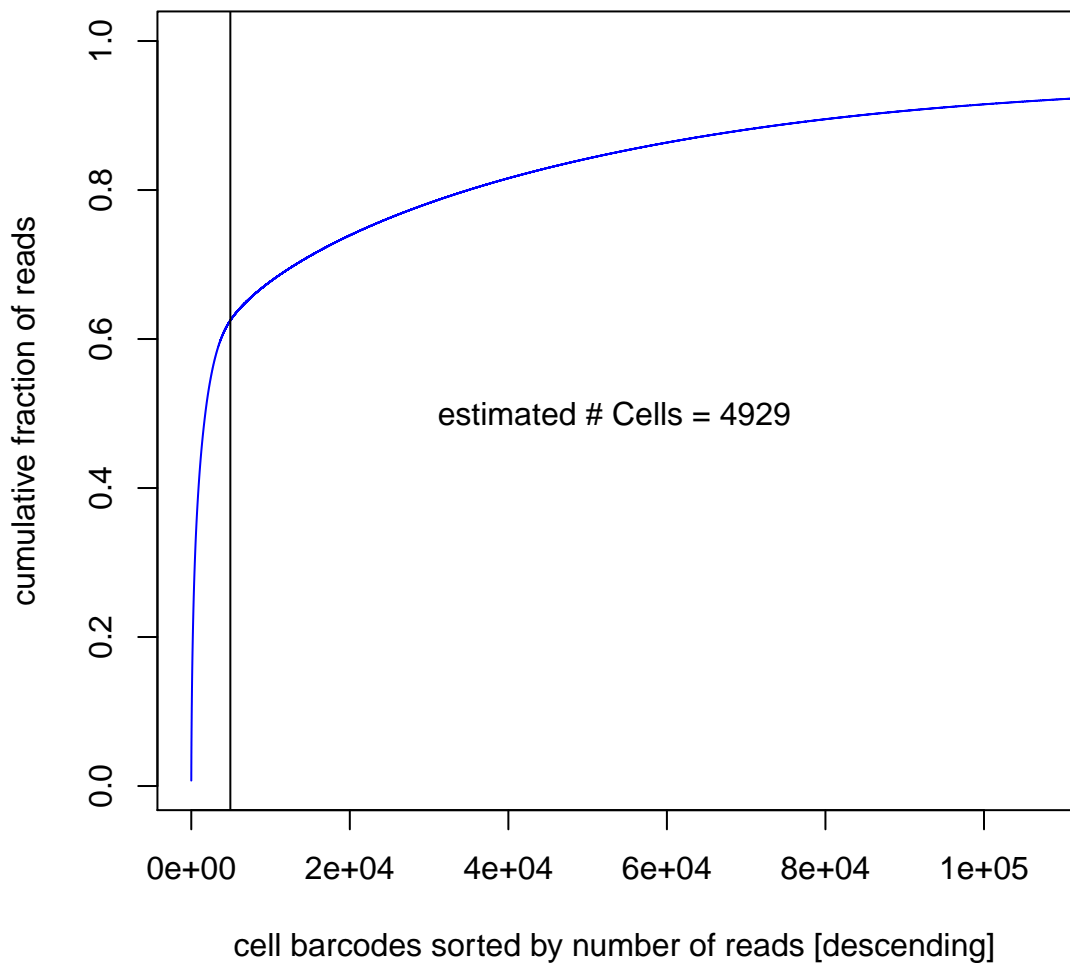

Supplement: Supplemental_Code_S1.tar.gz [file D12-N2_S2.pdf › Supplemental_Code_S1/05_hydraAtlasReMap/01_mapping/dgeGeneration/D12-N2_S2/D12-N2_S2.pdf]
